# Supplementary material for: Exportin Crm1 is repurposed as a docking protein to generate microtubule organizing centers at the nuclear pore
Source: eLife. 2018 May 29;7:e33465. doi: 10.7554/eLife.33465 (PMC6008054; doi:10.7554/eLife.33465)
Supplement: Supplementary file 1. [file elife-33465-supp1.xlsx]

## Sheet: Yeast strains, listed by figure
Yeast strains used in this work
Lab strain number	Genotype	Figure	Source
KS7611	h- KanMX:nmt81:GFP-mto1[1-9A1-549]-HTB:hphMX4 mto2[17A]:hphMX6 ade6-210 leu1-32 ura4-D18	Fig1 C,D,E,F	This study
KS8371	h- KanMX6:nmt81:GFP-mto1[131-9A1-549]-HTB:hphMX4 mto2[17A]:hphMX6 ade6-210 leu1-32 ura4-D18	Fig1 C,E,F	This study
KS819	h+ mto1-GFP:KanMX ade6-216 leu1-32 ura4-D18	Fig1S1 A	Sawin lab
KS5209	h- mto1[1-549]-GFP:KanMX6 ade6-210 leu1-32 ura4-D18	Fig1S1 A	Sawin lab
KS5940	h- mto1[131-1115]-GFP:KanMX6 ade6-210 ura4-D18 leu1-32	Fig1S1 A	Sawin lab
KS5922	h- mto1[131-549]-GFP:KanMX6 ade6-210 ura4-D18 leu1-32	Fig1S1 A	Sawin lab
KS5609	h+ mto1[1-549]-GFP:KanMX6 ade6-210 leu1-32 ura4-D18	Fig1S1 B	Sawin lab
KS5750	h+ mto1[1-9A1-549]-GFP:KanMX ade6-216 leu1-32 ura4-D18	Fig1S1 B	Sawin lab
KS6080	h+ mto1[131-9A1-549]-GFP:KanMX6 ade6-216 leu1-32 ura4-D18	Fig1S1 B	Sawin lab
KS6339	h+ mto1[131-549]-GFP:KanMX6 hphMX6:nmt81:mCh-atb2 ade6-210 ura4-D18 leu1-32	Fig1S1 B	Sawin lab
KS7611	h- KanMX:nmt81:GFP-mto1[1-9A1-549]-HTB:hphMX4 mto2[17A]:hphMX6 ade6-210 leu1-32 ura4-D18	Fig1S1 C	This study
KS8371	h- KanMX6:nmt81:GFP-mto1[131-9A1-549]-HTB:hphMX4 mto2[17A]:hphMX6 ade6-210 leu1-32 ura4-D18	Fig1S1 C	This study
KS7217	h- mto1[1-9A1-549]-GFP:KanMX6 ade6-216 leu1-32 ura4-D18	Fig1S1 D	This study
KS8253	h+ mto1[1-9A1-549]-GFP alp7∆::ura4+ ade6-216 leu1-32 ura4-D18	Fig1S1 D	This study (parent strain alp7∆::ura4+ (KS7884) used for strain construction is from M. Sato lab (MS109))
KS7380	h+ mto1[1-9A1-549]-GFP:KanMX6 nup146-3×mcherry:KanMX6 nup132Δ::NatMX6 ade6-216 leu1-32 ura4-D18	Fig2 A	This study
KS5750	h+ mto1[1-9A1-549]-GFP:KanMX ade6-216 leu1-32 ura4-D18	Fig2 B	Sawin lab
KS7255	h+ mto1[1-9A1-549]-GFP:KanMX6 nup146-3×mcherry:KanMX6 ade6-216 leu1-32 ura4-D18	Fig3 A	This study
KS9340	h+ mto1[1-9A1-549]-GFP:KanMX6 nup146-3×mcherry:KanMX6 crm1-C529A ade6-216 leu1-32 ura4-D18	Fig3 B	This study
KS7669	h- NatMX:nmt1:GFP-mto1[1-9A1-549]-HTB:hphMX4 mto2[17A]:hphMX6 ade6-210 leu1-32 ura4-D18	Fig3 C	This study
KS8066	h+ mto1[1-9A1-549]:hphMX6 alp7-3GFP:KanMX nup146-3xmcherry:KanMX6 ade6-216 leu1-32 ura4-D18	Fig3S1 A	This study (parent strain alp7-3GFP:KanMX (KS7888) used for strain construction is from M. Sato lab (MS1000))
KS7255	h+ mto1[1-9A1-549]-GFP:KanMX6 nup146-3×mcherry:KanMX6 ade6-216 leu1-32 ura4-D18	Fig3S1 B	This study
KS9221	h+ mto1[1-9A1-549]-GFP:KanMX6 nup146-3×mcherry:KanMX6 crm1-C529S ade6-216 leu1-32 ura4-D18	Fig3S1 B,C	This study
KS9336	h+ mto1[1-9A1-549]-GFP:KanMX6 nup146-3×mcherry:KanMX6 crm1-C529V ade6-216 leu1-32 ura4-D18	Fig3S1 B,C	This study
KS9338	h+ mto1[1-9A1-549]-GFP:KanMX6 nup146-3×mcherry:KanMX6 crm1-C529T ade6-216 leu1-32 ura4-D18	Fig3S1 B,C	This study
KS9340	h+ mto1[1-9A1-549]-GFP:KanMX6 nup146-3×mcherry:KanMX6 crm1-C529A ade6-216 leu1-32 ura4-D18	Fig3S1 B	This study
KS7669	h- NatMX:nmt1:GFP-mto1[1-9A1-549]-HTB:hphMX4 mto2[17A]:hphMX6 ade6-210 leu1-32 ura4-D18	Fig3S1 D	This study
KS516	h- ade6-216 ura4-D18 leu1-32	Fig3S2	Sawin lab
KS7611	h- KanMX:nmt81:GFP-mto1[1-9A1-549]-HTB:hphMX4 mto2[17A]:hphMX6 ade6-210 leu1-32 ura4-D18	Fig4 C,D	This study
KS8573	h+ KanMX6:nmt81:GFP-mto1[26-9A1-549]-HTB:hphMX4 mto2[17A]:hphMX6 ade6-216 leu-132 ura4-D18	Fig4 C,D	This study
KS9467	h- kanMX:nmt81:GFP-mto1[1-12]-GST:NatMX6 ade6-210 leu1-32 ura4-D18	Fig4 E	This study
KS9469	h- kanMX:nmt81:GFP-mto1[1-29]-GST:NatMX6 ade6-210 leu1-32 ura4-D18	Fig4 E,F	This study
KS9471	h- kanMX:nmt81:GFP-mto1[1-29]-13Myc:NatMX6 ade6-210 leu1-32 ura4-D18	Fig4 E	This study
KS7611	h- KanMX:nmt81:GFP-mto1[1-9A1-549]-HTB:hphMX4 mto2[17A]:hphMX6 ade6-210 leu1-32 ura4-D18	Fig4S1	This study
KS8573	h+ KanMX6:nmt81:GFP-mto1[26-9A1-549]-HTB:hphMX4 mto2[17A]:hphMX6 ade6-216 leu-132 ura4-D18	Fig4S1	This study
KS7217	h- mto1[1-9A1-549]-GFP:KanMX6 ade6-216 leu1-32 ura4-D18	Fig5	This study
KS8607	h+ mto1[1-9A1-549]-GFP:KanMX nmt41:spi1+:NatMX6(Chr3) ade6-216 leu1-32	Fig5	This study
KS8610	h+ mto1[1-9A1-549]-GFP:KanMX nmt41:spi1[T23N]:NatMX6 (Chr3) ade6-216 leu1-32	Fig5	This study
KS8613	h+ mto1[1-9A1-549]-GFP:KanMX nmt41:spi1[Q68L]:NatMX6 (Chr3) ade6-216 leu1-32	Fig5	This study
KS7217	h- mto1[1-9A1-549]-GFP:KanMX6 ade6-216 leu1-32 ura4-D18	Fig5S1 A	This study
KS8607	h+ mto1[1-9A1-549]-GFP:KanMX nmt41:spi1+:NatMX6(Chr3) ade6-216 leu1-32	Fig5S1 A	This study
KS8610	h+ mto1[1-9A1-549]-GFP:KanMX nmt41:spi1[T23N]:NatMX6 (Chr3) ade6-216 leu1-32	Fig5S1 A	This study
KS8613	h+ mto1[1-9A1-549]-GFP:KanMX nmt41:spi1[Q68L]:NatMX6 (Chr3) ade6-216 leu1-32	Fig5S1 A	This study
KS9016	h+ mto1[1-9A1-549]-GFP:KanMX nmt81:GST-NLS-mCherry:Leu+ hphMX6 (Chr3) ade6-216 leu1-32	Fig5S1 B	This study (parent strain nmt81:GST-NLS-mCherry:Leu+ (KS8278) used for strain construction is from S. Oliferenko lab (SO7393))
KS8959	h+ mto1[1-9A1-549]-GFP:KanMX nmt41:spi1+:NatMX6 (Chr3) nmt81:GST-NLS-mCherry:Leu+ ade6-216 leu1-32	Fig5S1 B	This study (parent strain nmt81:GST-NLS-mCherry:Leu+ (KS8278) used for strain construction is from S. Oliferenko lab (SO7393))
KS8961	h+ mto1[1-9A1-549]-GFP:KanMX nmt41:spi1[T23N]:NatMX6 (Chr3) nmt81:GST-NLS-mCherry:Leu+ ade6-216 leu1-32	Fig5S1 B	This study (parent strain nmt81:GST-NLS-mCherry:Leu+ (KS8278) used for strain construction is from S. Oliferenko lab (SO7393))
KS8962	h+ mto1[1-9A1-549]-GFP:KanMX nmt41:spi1[Q68L]:NatMX6 (Chr3) nmt81:GST-NLS-mCherry:Leu+ ade6-216 leu1-32	Fig5S1 B	This study (parent strain nmt81:GST-NLS-mCherry:Leu+ (KS8278) used for strain construction is from S. Oliferenko lab (SO7393))
KS7217	h- mto1[1-9A1-549]-GFP:KanMX6 ade6-216 leu1-32 ura4-D18	Fig6 B	This study
KS8396	h- mto1[1-9A1-549]-GFP:KanMX6 nup146[FG5-12Δ] ade6-210 leu1-32 ura4-D18	Fig6 B	This study
KS516	h- ade6-216 ura4-D18 leu1-32	Fig6 C	Sawin lab
KS8360	h- nup146[FG5-12Δ] ade6-210 leu1-32 ura4-D18	Fig6 C	This study
KS5358	h+ mto1[1-549]-GFP:KanMX6 hphMX6:nmt81:GFP-atb2 alp4-tdT:natMX6 ade6-210 leu1-32 ura4-D18	Fig6 D,E	Sawin lab
KS8384	h+ mto1[1-549]-GFP:KanMX6 hphMX6:nmt81:GFP-atb2 alp4-tdT:natMX6 nup146[FG5-12Δ] ade6-210 leu1-32 ura4-D18	Fig6 D,E	This study
KS9021	h+ KanMX:nmt81:GFP-mto1[1-9A1-549]-HTB:hphMX4 mto2[17A]:hphMX6 car2∆::NatMX6 arg1-230 lys3-37	Fig6 F	This study
KS9077	h- KanMX:nmt81:GFP-mto1[1-9A1-549]-HTB:hphMX4 mto2[17A]:hphMX6 car2∆::NatMX6 nup146[FG5-12∆] arg1-230 lys3-37	Fig6 F	This study
KS8401	h- mto1[1-9A1-549]-GFP:KanMX6 nup146[FG5-12∆]-3xmCherry:NatMX ade6-210 leu1-32 ura4-D18	Fig6S1 B	This study
KS9021	h+ KanMX:nmt81:GFP-mto1[1-9A1-549]-HTB:hphMX4 mto2[17A]:hphMX6 car2∆::NatMX6 arg1-230 lys3-37	Fig6S1 C	This study
KS9077	h- KanMX:nmt81:GFP-mto1[1-9A1-549]-HTB:hphMX4 mto2[17A]:hphMX6 car2∆::NatMX6 nup146[FG5-12∆] arg1-230 lys3-37	Fig6S1 C	This study
KS7742	h- hphMX6 (Chr3)	Materials and methods	This study (from I. Hagan lab)
KS8254	h+ nup146-rpl42+:NatMX6 rpl42.sP56Q leu1-32 ura4-D18	Materials and methods	This study (parent strain rpl42.sP56Q (KS8072) used for strain construction is from I. Hagan lab (IH8794))
KS7192	h- mto1[131-9A1-549]-GFP:KanMX6 car2∆::KanMX4 arg1-230 lys3-37	Suppl. File 2	This study
KS7194	h- mto1[1-9A1-549]-GFP:KanMX6 car2∆::KanMX4 arg1-230 lys3-37	Suppl. File 2	This study

## Sheet: Plasmids
Plasmids used in the work
Lab plasmid number	Description	Source
n/a	pJET1.2/blunt	Thermo Fisher Scientific
pKS698	pFA6a-GST:natMX6	Van Driessche et al., PMID:16200506
pKS1413	pFA6a-13Myc:natMX6	Van Driessche et al., PMID:16200506
pKS713	pFA6a-natMX6-P3nmt1-GFP	Van Driessche et al., PMID:16200506
pKS1167	pFA6a-3xmcherry:kanMX6	Lab stock
pKS1412	pFA6a-rpl42-NatMX6	Fennessy et al., PMID:24848109
pKS1511	pJET-nup146 genomic DNA	This study
pKS1514	pJET-nup146[FG5-12Δ] genomic DNA	This study
pKS1595	pJET-spi1[T23N] genomic DNA	This study
pKS1596	pJET-spi1[Q68L] genomic DNA	This study
pKS1597	pINTH41-spi1+ genomic DNA	This study
pKS1598	pINTH41-spi1[T23N] genomic DNA	This study
pKS1599	pINTH41-spi1[Q68L] genomic DNA	This study
pKS1603	pJET-spi1+ genomic DNA	This study
pKS1613	pINTH41	Fennessy et al., PMID:24848109
pKS170	pFA6a-kanMX6:nmt81-GFP	Bähler et al., PMID:9717240
pKS1734	pMA-T_Crm1C529S	This study
pKS1735	pMA-T_Crm1C529A	This study
pKS1737	pMA-T_Crm1C529T	This study
pKS1738	pMA-T_Crm1C529V	This study
pKS465	pFA6a-HTB:hphMX4	Tagwerker et al., PMID:16432255
pKS693	pFA6a-natMX6	Hentges et al., PMID:16200533
pKS706	pFA6a-natMX6:nmt81	Van Driessche et al., PMID:16200506

## Sheet: Oligonucleotides
Oligonucleotides used in this work
Lab oligo number	Sequence	Description	Use
OKS2460	ACTATCTTAGGGAGTTTGAGCGACAAGACGCATTTCGTAATGGTGTCTTTAAAAGGCTTACTAGTCTGAAAAAGGCCGATCGGATCCCCGGGTTAATTAA	Fwd nup146 c-terminal tagging	generate nup146-3xmCherry strain
OKS2461	TATGAATTTCTATTTATATTAAACCGTAAACATAATTTAGGAAACATCCATCAACTGAAATCCATATATTTTTGGTAAATGAATTCGAGCTCGTTTAAAC	Rev nup146 c-terminal tagging	generate nup146-3xmCherry strain
OKS2570	GCCATATTCTATCCCTAAGGGTATTAAGGAGTCAAATAGACGATAACCGCCAGTATCAGTACTGATATCGTCAAATAGTCCGGATCCCCGGGTTAATTAA	Fwd nup132 deletion by natMX6	generate nup132 deletion strain
OKS2571	AATGATCAAGGGACTCGGATGAAACCTATCTAACCAAAATTCTTTTATTATCTAATGGGTTTGTATGATTAAGATAAAGGGAATTCGAGCTCGTTTAAAC	Rev nup132 deletion by natMX6	generate nup132 deletion strain
OKS2105	TGATGAGAATGGAGCAACAATGGCGGGAAGATGTTGACCAACTCCAGGAATATGTCGAAGAGATTACCCAAGAACTCCAGCGGATCCCCGGGTTAATTAA	Fwd for C-terminal mto1 tagging mto1[1-549], for all C-terminal tagging	generate nmt81:GFP-mto1[1/26/131-9A1-549]-HTB strains
OKS2116	TATAAATCTTGGAATTAGCTTATTTTGTCAATTAAATTCTCCAACTAAGTAGATATGTACTGGTGATTAAGAAAAGCTATGAATTCGAGCTCGTTTAAAC	Rev for the kanMX-based C-term deletions of mto1. Can be used with tags or without tags.	generate nmt81:GFP-mto1[1/26/131-9A1-549]-HTB strains, nmt81:GFP-mto1[1-12]-GST, and nmt81:GFP-mto1[1-12/29]-GST/13Myc strains
OKS444	ACTACATATATGCCATAGCGTATCAATAGGCATATCTTCGATCCCATACTTTCTTTTAACAATTAACAATTTAAGAAAGAGAATTCGAGCTCGTTTAAAC	Fwd for knock-in of 5' end of mto1. To make nmt:(+/-GFP) mto1 N-terminal deletions	generate nmt81:GFP-mto1[1/26/131-9A1-549]-HTB strains
OKS346	TCCGTCAGCGAAAGACCAGCTAAATTATCCACTAGAACATTAAAGTTATTACTATCTAACTCACTGGAATTTTCTTCCATTTTGTATAGTTCATCCATGC	Rev for knock-in of 5' end of mto1. This is for a GFP tag on N-terminus of the protein.	generate nmt81:GFP-mto1[1-9A1-549]-HTB strain
OKS3346	TCGTCTTTTGATGTAGAAGAGGGTAATTGCCGAGATCCTTCCTTTCTGGGTGATAAAATGCGACGAACTTCCTCGTCCGTTTTGTATAGTTCATCCATGC	Rev to make nmt81:GFP-mto1[26-9A1-549] N-terminal truncation	generate nmt81:GFP-mto1[26-9A1-549]-HTB strain
OKS445	CTATCTTCTTCATACTGCTCTTGGCTCTGAAACCCTTGATTAGCCGTAAGTACGGGAGAAAGCTGTTCATCATCAGTAGTTTTGTATAGTTCATCCATGC	Rev to make nmt81:GFP-mto1[131-9A1-549] N-terminal truncation.	generate nmt81:GFP-mto1[131-9A1-549]-HTB strain
OKS2673	CATTGAACACCATAAGTGAAAGTAGTGAC	Fwd amplify NatMX6:nmt1 from pKS713 for KanMX6:nmt81 swap in KS7390	generate nmt1:GFP-mto1[1-9A1-549]-HTB strain
OKS2676	ATCACGCTAACATTTGATTAAAATAGAAC	Rev amplify NatMX6:nmt1 from pKS713 for KanMX6:nmt81 swap in KS7390	generate nmt1:GFP-mto1[1-9A1-549]-HTB strain
OKS 3853	CTGCTTTGGATTTGCTTATGTCGAAGTTCGTTTTCTAATCAATTATGGAAGAAAATTCCAGTGAGTTAGATAGTAATAACCGGATCCCCGGGTTAATTAA	Fwd for generating nmt81:GFP-Mto1[1-12]-GST strain	generate nmt81:GFP-Mto1[1-12]-GST strain
OKS 3854	AAAATTCCAGTGAGTTAGATAGTAATAACTTTAATGTTCTAGTGGATAATTTAGCTGGTCTTTCGCTGACGGACGAGGAACGGATCCCCGGGTTAATTAA	Fwd for generating nmt81:GFP-Mto1[1-29]-GST/13Myc strains	generate nmt81:GFP-Mto1[1-29]-GST/13Myc strains
OKS3063	CTGCAAAAGCAAATTTCTATTGTGAGTC	Fwd nup146 mutagenesis, in 5’ flanking region of nup146, 528 bp upstream of start codon	generate pJET-nup146+ genomic DNA plasmid
OKS3067	TCTTTACCAGCATTCAAAGTTCAATTGAG	Rev nup146 mutagenesis, in 3’ flanking region of nup146, 539 bp downstream of stop codon	generate pJET-nup146+ genomic DNA plasmid
OKS3093	AGATTTAGCACCCGAAGAAGC	Rev nup146 FG5-12 deletion from pJET-full length nup146	generate pJET-nup146[FG5-12∆] genomic DNA plasmid
OKS3094	CCATTATCTGGTGCTGCTACT	Fwd nup146 FG5-12 deletion from pJET-full length nup146	generate pJET-nup146[FG5-12∆] genomic DNA plasmid
OKS3098	AATATCACAAATTACTTATGCACAAGTGAACGTTGGCCGTGCAATTCGTCATTTAGCTGGCAACTGAATCGAATATTTTAATAGACTACAGAAGAAAAAC	Fwd Nup146 mutagenesis, amplify FG5-12 deleted Nup146 from pJET-Nup146 FG5-12 deletion plasmids	generate nup146[FG5-12∆] strain
OKS3099	CACGACGTATCACAATGCATTATGAATTTCTATTTATATTAAACCGTAAACATAATTTAGGAAACATCCATCAACTGAAATCCATATATTTTTGGTAAAT	Rev Nup146 mutagenesis, amplify FG5-12 deleted Nup146 from pJET-Nup146 FG5-12 deletion plasmids	generate nup146[FG5-12∆] strain
OKS3290	TCCCCATATGGCTCAACCACAAAAC	Fwd amplify Spi1 DNA from genomic DNA, with NdeI site	generate pJET-spi1+ genomic DNA plasmid
OKS3291	AGGGGGATCCTTACAAATCAGCGTC	Rev amplify Spi1 DNA from genomic DNA, with BamHI site	generate pJET-spi1+ genomic DNA plasmid
OKS3139	AGACCAGCGGTATCCCAAACATTAAAGC	Rev to make Q68L mutation for Spi1, CAA to CTT	generate pJET-spi1[Q68L] genomic DNA plasmid
OKS3140	TGAAAAGTTAGGTGGCCTTCGTGATGG	Fwd to make Q68L mutation for Spi1, CAA to CTT	generate pJET-spi1[Q68L] genomic DNA plasmid
OKS3336	TACCGGTAAGAACACGTTCGTCAAG	Fwd quikchange to make spi1 T23N mutation, ACC to AAC	generate pJET-spi1[T23N] genomic DNA plasmid
OKS3337	CTTGACGAACGTGTTCTTACCGGTA	Rev quikchange to make spi1 T23N mutation, ACC to AAC, paired with OKS 3336	generate pJET-spi1[T23N] genomic DNA plasmid
OKS2487	TTTGTTAAAATCCCTTTGATTTGTTTTAC	Rev colony PCR to check nup146 deletion/C-terminal tagging. In 3’UTR of nup146, 219nt away from nup146 stop codon	confirm the tagging of rpl42-natmx6 at the C-terminus of nup146
OKS3047	AAATGTTAGCGTGATTTATATTTTTTTTC	Fwd colony PCR to check nup146 C-terminal tagging. In Ttef, 152bp away from PmeI cutting site	confirm the tagging of rpl42-natmx6 at the C-terminus of nup146
OKS3154	ATTATCCTGAAATGAATGTTATTAAAGAC	Fwd colony PCR to check FG5-12 deletion of nup146, 230bp away from ligation junction (upstream of FG5)	confirm nup146[FG5-12∆] in cells after transformed nup146[FG5-12∆] fragment into KS8254
OKS3155	TCCGCTAGTAACGTATTATTAGAAAACTG	Rev colony PCR to check FG5-12 deletion of nup146, 233bp away from ligation junction (downstream of FG12)	confirm nup146[FG5-12∆] in cells after transformed nup146[FG5-12∆] fragment into KS8254
OKS3069	TATCACAAATTACTTATGCACAAGTGAAC	Fwd1 for both full-length, FG5-12 deletion sequencing, in 5' UTR of nup146, 98bp away from start codon	sequencing pJET-nup146+/[FG5-12∆] genomic DNA
OKS3070	CTAACGTTCTCAAAGACTCTGCAAGC	Fwd2 for both full-length, FG5-12 deletion sequencing, in CDS of nup146, 365bp away from start codon (including intron 1)	sequencing pJET-nup146+/[FG5-12∆] genomic DNA
OKS3071	TGTCGAATGTATTAGTTGGATAGAGAATC	Fwd3 for both full-length, FG5-12 deletion sequencing, in CDS of nup146, 816bp away from start codon (including intron 1)	sequencing pJET-nup146+/[FG5-12∆] genomic DNA
OKS3072	GGATTGTTCTCCATTACCTATTGTTTG	Fwd4 for both full-length, FG5-12 deletion sequencing, in CDS of nup146, 1279bp away from start codon (including intron 1)	sequencing pJET-nup146+/[FG5-12∆] genomic DNA
OKS3073	CTCTAATATGAATCAGAAACTTGATTTTG	Fwd5 for full-length sequencing, in CDS of nup146, 1740bp away from start codon (including intron 1)	sequencing pJET-nup146+ genomic DNA
OKS3074	GGAAAAAATTTTTCTATTTTTGGTAAAAC	Fwd6 for full-length sequencing, in CDS of nup146, 2203bp away from start codon (including intron 1)	sequencing pJET-nup146+ genomic DNA
OKS3075	TAAACCTTTAGTCGAGAAAGAAAGTAAGC	Fwd7 for full-length sequencing, in CDS of nup146, 2661bp away from start codon (including intron 1)	sequencing pJET-nup146+ genomic DNA
OKS3076	CCTTTTTCTTCTCCTAAATTAAAATTAGC	Fwd8 for full-length sequencing, in CDS of nup146, 3121bp away from start codon (including intron 1)	sequencing pJET-nup146+ genomic DNA
OKS3077	GATCCAGGTTACTAGATTGTTGAAGGC	Fwd9 for full-length sequencing, in CDS of nup146, 3557bp away from start codon (including intron 1)	sequencing pJET-nup146+ genomic DNA
OKS3078	TCTTTAAAAGGCTTACTAGTCTGAAAAAG	Fwd10 for full-length sequencing, in CDS of nup146, 4010bp away from start codon (including intron 1)	sequencing pJET-nup146+ genomic DNA
OKS3079	ATGTCTAAACCTTAAACTTTAGAAGGAAC	Fwd11 for full-length sequencing, in 3’ UTR of nup146, 4272bp away from start codon (including intron 1)	sequencing pJET-nup146+ genomic DNA
OKS3146	AAGCCGCTTCAATTTTTGGTAGTAG	Fwd5 nup146 FG5-12 deletion sequencing, in CDS, 1753bp away from start codon	sequencing pJET-nup146[FG5-12∆] genomic DNA
OKS3147	TCTGAAAATGATAATGAAAAAGCTGAAG	Fwd6 nup146 FG5-12 deletion sequencing, in CDS, 2229bp away from start codon	sequencing pJET-nup146[FG5-12∆] genomic DNA
OKS3148	GTTCAACTCCTCCAAAAATACATGAAG	Fwd7 nup146 FG5-12 deletion sequencing, in CDS, 2724bp away from start codon	sequencing pJET-nup146[FG5-12∆] genomic DNA
OKS3149	GAGTACATTGAAGGTCAAACGTCAAC	Fwd8 nup146 FG5-12 deletion sequencing, in CDS, 3190bp away from start codon	sequencing pJET-nup146[FG5-12∆] genomic DNA
OKS3150	TAGAAAAGGATATTAAAAGAATGGCGAC	Fwd9 nup146 FG5-12 deletion sequencing, in CDS, 3661bp away from start codon	sequencing pJET-nup146[FG5-12∆] genomic DNA
OKS3744	TTAGAAACGTTACCATTGAATGTCTTACC	Fwd to amplify Crm1-C529S/A/T/V sequence from yeast genomic DNA, 183bp upstream of the start site of full 1288 bp Crm1 fragment	amplify crm1-C529S/A/T/V DNA fragment from genomic DNA for sequencing the mutation at crm1 residue 529
OKS3747	TTATCAAATTAAGAACTTCGGCATCAC	Rev to amplify Crm1-C529S/A/T/V sequence from yeast genomic DNA, 203bp downstream of the stop site of full 1288 bp Crm1 fragment	amplify crm1-C529S/A/T/V DNA fragment from genomic DNA for sequencing the mutation at crm1 residue 529
OKS3735	TCTATGCGTGAGGTTCTTGTGTAC	Fwd1 to sequence Crm1-C529S/A/T/V mutation in genomic DNA, 216bp upstream of Crm1-C529S/A/T/V	sequencing Crm1-C529S/A/T/V mutation in genomic DNA
OKS3736	CAAAATTTGAATACTCTTTGTTGGG	Fwd2 to sequence Crm1-C529S/A/T/V mutation in genomic DNA, 108bp upstream of Crm1-C529S/A/T/V	sequencing Crm1-C529S/A/T/V mutation in genomic DNA
OKS3737	GAAATTTCCAATGAGCTTTTAAAAAG	Rev1 to sequence Crm1-C529S/A/T/V mutation in genomic DNA, 100bp downstream of Crm1-C529S/A/T/V	sequencing Crm1-C529S/A/T/V mutation in genomic DNA
OKS3738	ATTTTTGAGCAATCTTAATGAATGTATC	Rev2 to sequence Crm1-C529S/A/T/V mutation in genomic DNA, 199bp downstream of Crm1-C529S/A/T/V	sequencing Crm1-C529S/A/T/V mutation in genomic DNA
pJET1.2 Forward Sequencing Primer, 23-mer	CGACTCACTATAGGGAGAGCGGC	pJET1.2 Forward Sequencing Primer, 23-mer	sequencing pJET-spi1+/[Q68L]/[T23N] plasmids
pJET1.2 Reverse Sequencing Primer, 24-mer	AAGAACATCGATTTTCCATGGCAG	pJET1.2 Reverse Sequencing Primer, 24-mer	sequencing pJET-spi1+/[Q68L]/[T23N] plasmids. Sequencing pJET-nup146+/[FG5-12∆] plasmids
