# Supplementary material for: Exportin Crm1 is repurposed as a docking protein to generate microtubule organizing centers at the nuclear pore
Source: eLife. 2018 May 29;7:e33465. doi: 10.7554/eLife.33465 (PMC6008054; doi:10.7554/eLife.33465)
Supplement: Supplementary file 2. [file elife-33465-supp2.xlsx]

## Sheet: E130212_proteinGroups_all
Protein IDs	Majority protein IDs	Peptide counts (all)	Peptide counts (razor+unique)	Peptide counts (unique)	Fasta headers	Proteins	Peptides	Razor + unique peptides	Unique peptides	Sequence coverage [%]	Unique + razor sequence coverage [%]	Unique sequence coverage [%]	Mol. weight [kDa]	Sequence length	Sequence lengths	PEP	Ratio H/L	Ratio H/L normalized	Ratio H/L variability [%]	Ratio H/L count	Intensity	Intensity L	Intensity H	Only identified by site	Reverse	Contaminant	id	Peptide IDs	Peptide is razor	Mod. peptide IDs	Evidence IDs	MS/MS IDs	Best MS/MS	Oxidation (M) site IDs	Oxidation (M) site positions
SPAC1002.09c	SPAC1002.09c	10	10	10	>SPAC1002.09c |dld1|dldh|dihydrolipoamide dehydrogenase Dld1|Schizosaccharomyces pombe|chr 1|||Manual	1	10	10	10	30.1	30.1	30.1	54.731	511	511	1.6061e-195	2.3119	2.1909	20.785	22	3946800000	1053300000	2893500000				43	276;609;896;1572;2228;2576;2878;2879;3446;3565	True;True;True;True;True;True;True;True;True;True	291;645;948;949;950;1681;1682;2423;2809;2810;3129;3130;3751;3752;3884;3885	435;1049;1050;1051;1488;1489;1490;1491;1492;2563;2564;3665;4274;4275;4276;4709;4710;4711;5597;5598;5599;5600;5601;5785;5786;5787	620;1511;1512;1513;1514;2133;2134;2135;2136;2137;2138;2139;2140;2141;2142;3680;3681;5253;6124;6125;6126;6714;6715;6716;6717;6718;6719;8021;8022;8023;8024;8025;8026;8288;8289;8290;8291;8292	620;1513;2134;3681;5253;6125;6715;6718;8023;8290	42;43;44;45;46	126;127;220;333;363
SPAC1002.12c	SPAC1002.12c	1	1	1	>SPAC1002.12c |||succinate-semialdehyde dehydrogenase |Schizosaccharomyces pombe|chr 1|||Manual	1	1	1	1	2	2	2	58.833	547	547	3.0611e-05	NaN	NaN	NaN	0	0	0	0				44	704	TRUE	747	1189	1710	1710
SPAC1006.07;SPAC1F5.10	SPAC1006.07	4;1	4;1	4;1	>SPAC1006.07 |||translation initiation factor eIF4A |Schizosaccharomyces pombe|chr 1|||Manual	2	4	4	4	19.6	19.6	19.6	44.436	392	392;394	6.1296e-31	0.83177	1.0228	12.057	6	446950000	229890000	217060000				45	148;216;895;1307	True;True;True;True	155;228;229;947;1391	258;350;351;352;1487;2150	367;498;499;500;501;2132;3089;3090	367;499;2132;3089	47	164
SPAC1006.09	SPAC1006.09	5	5	5	>SPAC1006.09 |win1|SPAC1250.06c, SPAPJ730.01|MAP kinase kinase kinase Win1|Schizosaccharomyces pombe|chr 1|||Manual	1	5	5	5	4.6	4.6	4.6	163.27	1436	1436	4.1742e-29	0.77202	0.94559	75.194	5	168330000	86826000	81505000				46	1257;1672;1904;2000;2796	True;True;True;True;True	1336;1787;2035;2139;2140;3046	2052;2725;3056;3195;3196;4581	2950;3916;3917;4380;4589;4590;6547	2950;3916;4380;4590;6547	48	1072
SPAC1071.07c;SPCC1393.03	SPAC1071.07c;SPCC1393.03	3;3	3;3	3;3	>SPAC1071.07c |rps1502|rps15-2, rps15|40S ribosomal protein S15 |Schizosaccharomyces pombe|chr 1|||Manual;>SPCC1393.03 |rps1501|rps15-1|40S ribosomal protein S15 |Schizosaccharomyces pombe|chr 3|||Manual	2	3	3	3	44.2	44.2	44.2	17.633	154	154;153	7.1159e-98	0.94597	1.113	12.805	5	1145700000	553590000	592100000				47	1016;1730;2326	True;True;True	1075;1853;2526;2527;2528	1673;1674;2818;3820;3821;3822;3823;3824	2397;2398;2399;2400;4052;4053;5464;5465;5466;5467;5468	2398;4053;5466	49;50	92;98
SPAC1071.08	SPAC1071.08	1	1	1	>SPAC1071.08 |rpp203|rpp2-3, rla6|60S acidic ribosomal protein P2C subunit|Schizosaccharomyces pombe|chr 1|||Manual	1	1	1	1	15.5	15.5	15.5	11.114	110	110	1.812e-17	NaN	NaN	NaN	0	0	0	0				48	564	TRUE	595	972;973	1398;1399	1399
SPAC1071.10c;SPCC1020.01c	SPAC1071.10c	33;7	33;7	33;7	>SPAC1071.10c |pma1||P-type proton ATPase, P3-type Pma1|Schizosaccharomyces pombe|chr 1|||Manual	2	33	33	33	39.1	39.1	39.1	99.883	919	919;1010	1.2495e-283	0.87141	1.0379	28.956	52	5709900000	2954700000	2755300000				49	42;46;532;929;1045;1046;1144;1499;1524;1537;1620;1698;1758;1998;2165;2166;2476;2575;2638;2756;3296;3297;3416;3444;3445;3476;3477;3609;3656;3721;3742;3771;3772	True;True;True;True;True;True;True;True;True;True;True;True;True;True;True;True;True;True;True;True;True;True;True;True;True;True;True;True;True;True;True;True;True	45;49;562;984;1106;1107;1108;1216;1595;1624;1638;1639;1640;1733;1819;1884;2137;2339;2340;2341;2342;2703;2808;2878;3005;3592;3593;3720;3749;3750;3785;3786;3936;3986;4056;4077;4109;4110	77;81;919;1540;1541;1720;1721;1722;1875;1876;1877;2431;2476;2496;2497;2498;2499;2500;2501;2627;2628;2774;2860;3193;3519;3520;3521;3522;3523;4127;4272;4273;4362;4532;4533;5377;5378;5379;5556;5595;5596;5666;5667;5668;5882;5947;6045;6073;6114;6115;6116;6117;6118	109;110;115;116;1328;2213;2214;2215;2469;2470;2471;2472;2473;2474;2475;2709;2710;2711;2712;3493;3494;3559;3589;3590;3591;3592;3593;3594;3595;3596;3772;3773;3774;3983;3984;4107;4586;4587;5041;5042;5043;5044;5045;5046;5047;5048;5049;5050;5922;5923;6118;6119;6120;6121;6122;6123;6248;6484;6485;6486;6487;7673;7674;7675;7676;7677;7678;7959;8018;8019;8020;8121;8122;8123;8124;8428;8521;8664;8665;8703;870…	110;116;1328;2213;2469;2475;2710;3494;3559;3596;3774;3984;4107;4587;5042;5046;5923;6121;6248;6484;7675;7678;7959;8018;8020;8121;8123;8428;8521;8665;8703;8760;8765	51;52;53;54	525;528;554;629
SPAC1093.05	SPAC1093.05	2	2	2	>SPAC1093.05 |||ATP-dependent RNA helicase Hca4 |Schizosaccharomyces pombe|chr 1|||Manual	1	2	2	2	4.2	4.2	4.2	83.67	735	735	3.3234e-18	NaN	NaN	NaN	1	39026000	9313200	29713000				50	2737;3281	True;True	2984;3575	4508;4509;5348	6447;6448;7630	6448;7630
SPAC10F6.01c	SPAC10F6.01c	9	9	9	>SPAC10F6.01c |sir1|SPAC4C5.05c|sulfite reductase Sir1|Schizosaccharomyces pombe|chr 1|||Manual	1	9	9	9	10.8	10.8	10.8	163.84	1473	1473	1.7694e-101	0.99124	1.1885	22.069	12	695730000	324360000	371370000				51	312;1680;1808;2035;2053;2740;2969;3103;3521	True;True;True;True;True;True;True;True;True	329;1799;1936;2178;2179;2198;2987;3229;3377;3837	498;2741;2742;2927;3236;3237;3263;4512;4513;4860;4861;5055;5730	722;3938;3939;4200;4645;4646;4647;4691;6453;6454;6455;6456;6457;6458;6937;6938;6939;6940;7212;8209	722;3938;4200;4646;4691;6458;6939;7212;8209	55	1308
SPAC10F6.03c	SPAC10F6.03c	2	2	2	>SPAC10F6.03c |cts1||CTP synthase Cts1 |Schizosaccharomyces pombe|chr 1|||Manual	1	2	2	2	5.7	5.7	5.7	66.867	600	600	5.1187e-21	0.64068	0.78519	41.793	2	226730000	128650000	98077000				52	1756;3312	True;True	1882;3610	2858;5404;5405	4104;4105;7712;7713	4105;7713
SPAC10F6.09c	SPAC10F6.09c	3	3	3	>SPAC10F6.09c |psm3|smc3|mitotic cohesin complex subunit Psm3|Schizosaccharomyces pombe|chr 1|||Manual	1	3	3	3	4.4	4.4	4.4	136.85	1194	1194	1.2172e-20	0.82534	1.0027	23.593	2	88701000	49470000	39230000				53	2839;2870;3042	True;True;True	3089;3121;3309	4664;4701;4961	6659;6704;7081	6659;6704;7081
SPAC10F6.13c	SPAC10F6.13c	3	3	3	>SPAC10F6.13c |||aspartate aminotransferase |Schizosaccharomyces pombe|chr 1|||Manual	1	3	3	3	14.9	14.9	14.9	46.14	409	409	8.5946e-60	1.2759	1.5635	35.791	3	258990000	116840000	142150000				54	0;1418;1449	True;True;True	0;1510;1544	0;2300;2342	0;3296;3297;3358;3359	0;3297;3359
SPAC110.04c	SPAC110.04c	14	14	14	>SPAC110.04c |pss1|ssp1, SPAP14E8.01c|heat shock protein Pss1|Schizosaccharomyces pombe|chr 1|||Manual	1	14	14	14	25.4	25.4	25.4	80.374	720	720	3.5631e-95	0.91748	1.0326	26.613	17	1408300000	678120000	730200000				55	197;206;506;843;2324;2503;2566;2619;2642;2672;2993;3324;3343;3558	True;True;True;True;True;True;True;True;True;True;True;True;True;True	208;218;535;892;2524;2731;2799;2857;2882;2913;3255;3622;3641;3877	326;338;339;340;841;1385;3816;3817;4166;4167;4260;4334;4335;4367;4412;4413;4892;5418;5419;5451;5776	461;462;481;482;483;484;485;1221;1991;5458;5459;5460;5461;5969;5970;6099;6100;6206;6207;6208;6209;6253;6320;6321;6322;6323;6983;7732;7733;7734;7795;8275	462;482;1221;1991;5460;5970;6100;6209;6253;6321;6983;7732;7795;8275
SPAC1142.04	SPAC1142.04	4	4	4	>SPAC1142.04 |||Noc complex subunit Noc2 family |Schizosaccharomyces pombe|chr 1|||Manual	1	4	4	4	9.1	9.1	9.1	81.127	707	707	5.9084e-49	0.96581	1.1018	15.126	5	227860000	99287000	128570000				56	942;1586;1853;2520	True;True;True;True	997;1697;1982;2749	1556;1557;2582;2991;4191	2234;2235;2236;2237;3705;3706;3707;4298;6007;6008	2237;3707;4298;6007
SPAC1142.06	SPAC1142.06	1	1	1	>SPAC1142.06 |get3||GET complex ATPase subunit Get3 |Schizosaccharomyces pombe|chr 1|||Manual	1	1	1	1	3	3	3	36.548	329	329	0.020634	NaN	NaN	NaN	1	29036000	15708000	13328000				57	741	TRUE	786	1242	1780	1780
SPAC11D3.02c	SPAC11D3.02c	1	1	1	>SPAC11D3.02c |||ELLA family acetyltransferase |Schizosaccharomyces pombe|chr 1|||Manual	1	1	1	1	12	12	12	17.414	150	150	0.0068749	NaN	NaN	NaN	1	22904000	10314000	12590000				58	1562	TRUE	1670	2547	3660	3660
SPAC11D3.09	SPAC11D3.09	1	1	1	>SPAC11D3.09 |||agmatinase |Schizosaccharomyces pombe|chr 1|||Manual	1	1	1	1	2.5	2.5	2.5	42.879	394	394	0.013336	NaN	NaN	NaN	1	7103600	3880500	3223100				59	3152	TRUE	3430	5132	7318;7319	7319
SPAC11D3.14c	SPAC11D3.14c	1	1	1	>SPAC11D3.14c |||oxoprolinase |Schizosaccharomyces pombe|chr 1|||Manual	1	1	1	1	1.3	1.3	1.3	138.78	1260	1260	2.6211e-05	NaN	NaN	NaN	1	27216000	14471000	12744000				60	3060	TRUE	3328	4988	7119;7120	7120
SPAC11D3.15	SPAC11D3.15	1	1	1	>SPAC11D3.15 |||5-oxoprolinase |Schizosaccharomyces pombe|chr 1|||Manual	1	1	1	1	1.1	1.1	1.1	143.72	1317	1317	8.1817e-11	NaN	NaN	NaN	0	0	0	0				61	906	TRUE	961	1506	2162	2162
SPAC11E3.05	SPAC11E3.05	1	1	1	>SPAC11E3.05 |||ubiquitin-protein ligase E3, human WDR59 ortholog|Schizosaccharomyces pombe|chr 1|||Manual	1	1	1	1	1.5	1.5	1.5	149.06	1323	1323	3.0533e-05	0.64301	0.88721	18.919	2	31162000	19044000	12118000				62	994	TRUE	1053	1642;1643	2350;2351	2351
SPAC11E3.15	SPAC11E3.15	3	3	3	>SPAC11E3.15 |rpl22|SPAP8A3.01|60S ribosomal protein L22 |Schizosaccharomyces pombe|chr 1|||Manual	1	3	3	3	41.9	41.9	41.9	13.32	117	117	9.6387e-51	0.73432	0.91387	11.215	5	380030000	199470000	180560000				63	1169;3122;3601	True;True;True	1241;3399;3928	1907;1908;1909;1910;5090;5859;5860	2754;2755;2756;2757;2758;7262;8401;8402	2754;7262;8401
SPAC11G7.02	SPAC11G7.02	8	8	8	>SPAC11G7.02 |pub1||HECT-type ubiquitin-protein ligase E3 Pub1|Schizosaccharomyces pombe|chr 1|||Manual	1	8	8	8	14.5	14.5	14.5	87.267	767	767	7.1646e-51	0.71707	0.91975	23.692	7	411110000	229430000	181680000				64	491;976;1528;1551;2250;2259;3292;3417	True;True;True;True;True;True;True;True	518;1033;1628;1659;2448;2458;3587;3721	762;763;1606;2480;2481;2530;3716;3733;5368;5557	1111;1112;1113;1114;2304;3566;3567;3568;3569;3637;5319;5320;5343;7662;7960	1111;2304;3566;3637;5320;5343;7662;7960	56	108
SPAC11G7.03	SPAC11G7.03	1	1	1	>SPAC11G7.03 |idh1|glu3|isocitrate dehydrogenase |Schizosaccharomyces pombe|chr 1|||Manual	1	1	1	1	7.6	7.6	7.6	38.758	356	356	1.1796e-18	NaN	NaN	NaN	1	85301000	43582000	41718000				65	1089	TRUE	1154	1793	2585;2586;2587	2587
SPBC337.08c;SPAC589.10c;SPAC6G10.11c;SPAC11G7.04;SPAC1805.12c	SPBC337.08c;SPAC589.10c;SPAC6G10.11c;SPAC11G7.04;SPAC1805.12c	3;3;3;3;3	3;3;3;3;3	3;3;3;3;3	>SPBC337.08c |ubi4||ubiquitin|Schizosaccharomyces pombe|chr 2|||Manual;>SPAC589.10c |||ribomal-ubiquitin fusion protein Ubi5 |Schizosaccharomyces pombe|chr 1|||Manual;>SPAC6G10.11c |ubi3||ribosomal-ubiquitin fusion protein Ubi3 |Schizosaccharomyces pombe|c	5	3	3	3	31.4	31.4	31.4	42.972	382	382;150;150;128;128	1.322e-32	0.67063	0.8321	3.8906	4	618930000	348630000	270300000				66	2473;3212;3213	True;True;True	2700;3494;3495	4123;5216;5217;5218	5914;5915;7431;7432;7433;7434;7435	5914;7431;7434
SPAC11H11.06	SPAC11H11.06	5	5	5	>SPAC11H11.06 |arp2|SPAC22F8.01|ARP2/3 actin-organizing complex subunit Arp2|Schizosaccharomyces pombe|chr 1|||Manual	1	5	5	5	6.7	6.7	6.7	44.23	390	390	7.0265e-40	0.65128	0.81749	38.893	4	196420000	103520000	92893000				67	403;404;771;3781;3782	True;True;True;True;True	426;427;816;4120;4121	628;629;1286;6139;6140	913;914;1843;8794;8795;8796;8797	913;914;1843;8795;8796
SPAC12B10.14c	SPAC12B10.14c	1	1	1	>SPAC12B10.14c |ppk2||serine/threonine protein kinase Ppk2 |Schizosaccharomyces pombe|chr 1|||Manual	1	1	1	1	2.7	2.7	2.7	74.525	665	665	1.6616e-05	NaN	NaN	NaN	1	12550000	7709900	4839800				68	2605	TRUE	2843	4317	6182	6182
SPAC12G12.01c	SPAC12G12.01c	1	1	1	>SPAC12G12.01c ||SPAC630.02|ubiquitin-protein ligase E3|Schizosaccharomyces pombe|chr 1|||Manual	1	1	1	1	1.8	1.8	1.8	101.95	905	905	0.00075692	NaN	NaN	NaN	1	24566000	15380000	9186600				69	6	TRUE	6	8	9	9
SPAC12G12.04	SPAC12G12.04	6	6	6	>SPAC12G12.04 |mcp60|hsp60|mitochondrial heat shock protein Hsp60/Mcp60|Schizosaccharomyces pombe|chr 1|||Manual	1	6	6	6	11.2	11.2	11.2	62.167	582	582	8.6306e-48	0.85552	1.0038	21.13	6	371000000	183470000	187530000				70	908;1042;1617;2932;2933;3586	True;True;True;True;True;True	963;1103;1730;3187;3188;3907	1508;1717;2624;4804;4805;5816	2164;2165;2465;2466;3769;6866;6867;6868;8331;8332	2164;2465;3769;6866;6868;8331
SPAC12G12.05c	SPAC12G12.05c	2	2	2	>SPAC12G12.05c |taf9||SAGA complex/ transcription initiation factor Taf9|Schizosaccharomyces pombe|chr 1|||Manual	1	2	2	2	33.7	33.7	33.7	18.448	163	163	3.8408e-29	1.4644	1.7825	14.618	4	412720000	133210000	279510000				71	1682;1784	True;True	1801;1802;1911	2744;2745;2897;2898	3941;3942;4153;4154;4155	3942;4154	57	100
SPAC139.02c	SPAC139.02c	1	1	1	>SPAC139.02c |oac1||mitochondrial anion transporter |Schizosaccharomyces pombe|chr 1|||Manual	1	1	1	1	3.8	3.8	3.8	35.547	320	320	0.015461	NaN	NaN	NaN	1	44885000	21879000	23006000				72	934	TRUE	989	1546	2221	2221
SPAC13A11.02c	SPAC13A11.02c	2	2	2	>SPAC13A11.02c |erg11||sterol 14-demethylase |Schizosaccharomyces pombe|chr 1|||Manual	1	2	2	2	9.1	9.1	9.1	56.331	495	495	3.3143e-21	1.353	1.6033	20.64	2	129860000	50685000	79175000				73	814;1459	True;True	862;1554	1348;2356	1944;3380;3381	1944;3380
SPAC13A11.04c	SPAC13A11.04c	1	1	1	>SPAC13A11.04c |ubp8||SAGA complex ubiquitin C-terminal hydrolase Ubp8|Schizosaccharomyces pombe|chr 1|||Manual	1	1	1	1	5.6	5.6	5.6	51.72	449	449	1.7822e-10	NaN	NaN	NaN	1	25499000	7021800	18477000				74	909	TRUE	964	1509	2166	2166
SPAC13D1.01c;SPAC167.08;SPAC19D5.09c;SPAC26A3.13c;SPAC27E2.08;SPAC2E1P3.03c;SPAC9.04;SPAPB15E9.03c;SPBC1289.17;SPBC9B6.02c;SPCC1020.14	SPAC13D1.01c;SPAC167.08;SPAC19D5.09c;SPAC26A3.13c;SPAC27E2.08;SPAC2E1P3.03c;SPAC9.04;SPAPB15E9.03c;SPBC1289.17;SPBC9B6.02c;SPCC1020.14	1;1;1;1;1;1;1;1;1;1;1	1;1;1;1;1;1;1;1;1;1;1	1;1;1;1;1;1;1;1;1;1;1	>SPAC13D1.01c |Tf2-7||retrotransposable element|Schizosaccharomyces pombe|chr 1|||Manual;>SPAC167.08 |Tf2-2|SPAC1705.01c|retrotransposable element|Schizosaccharomyces pombe|chr 1|||Manual;>SPAC19D5.09c |Tf2-8|SPAC13D1.02c|retrotransposable element|Schizosa	11	1	1	1	1.4	1.4	1.4	154.95	1333	1333;1333;1333;1333;1333;1333;1333;1333;1333;1333;1333	0.0052556	NaN	NaN	NaN	1	17961000	7969800	9991400				75	3833	TRUE	4175	6215;6216	8909;8910	8909
SPAC13F5.06c	SPAC13F5.06c	3	3	3	>SPAC13F5.06c |sec10||exocyst complex subunit Sec10 |Schizosaccharomyces pombe|chr 1|||Manual	1	3	3	3	5.5	5.5	5.5	92.515	811	811	8.763e-15	0.96103	1.1735	21.05	3	80372000	45321000	35051000				76	1208;1760;3407	True;True;True	1280;1886;3711	1971;2862;5543	2839;4110;7942;7943	2839;4110;7943
SPAC13G6.02c	SPAC13G6.02c	5	5	5	>SPAC13G6.02c |rps101|rps1-1, rps3a-1|40S ribosomal protein S3a|Schizosaccharomyces pombe|chr 1|||Manual	1	5	5	5	25.8	25.8	25.8	28.488	252	252	1.5506e-71	0.71464	0.89075	16.592	10	1225300000	658190000	567080000				77	301;1298;1299;1513;2669	True;True;True;True;True	316;1380;1381;1611;2910	473;474;2135;2136;2137;2138;2139;2452;2453;4408	680;681;3066;3067;3068;3069;3070;3071;3072;3073;3521;3522;3523;6312;6313	680;3066;3069;3521;6312
SPAC13G6.06c	SPAC13G6.06c	1	1	1	>SPAC13G6.06c |gcv2||glycine cleavage complex subunit P |Schizosaccharomyces pombe|chr 1|||Manual	1	1	1	1	1.6	1.6	1.6	114.23	1031	1031	0.024286	NaN	NaN	NaN	0	0	0	0				78	3105	TRUE	3379	5057	7214	7214
SPAC13G6.07c	SPAC13G6.07c	5	1	1	>SPAC13G6.07c |rps601|rps6-1|40S ribosomal protein S6|Schizosaccharomyces pombe|chr 1|||Manual	1	5	1	1	31	7.1	7.1	27.499	239	239	1.0627e-81	0.93806	0.89171	0.96346	2	379280000	193930000	185350000				79	675;844;1436;2133;2447	False;True;False;False;False	715;893;1530;1531;2293;2294;2672;2673	1141;1142;1386;1387;2325;2326;2327;2328;3453;3454;4088;4089	1636;1637;1638;1639;1992;1993;1994;3331;3332;3333;3334;3335;3336;3337;4949;4950;4951;4952;4953;5866;5867	1639;1994;3337;4951;5866	58;59	32;63
SPAC13G6.11c	SPAC13G6.11c	1	1	1	>SPAC13G6.11c |erg12||mevalonate kinase Erg12 |Schizosaccharomyces pombe|chr 1|||Manual	1	1	1	1	4.2	4.2	4.2	43.406	404	404	4.012e-30	0.873	0.98818	6.0467	2	117820000	63782000	54042000				80	1963	TRUE	2102	3147;3148	4513;4514;4515	4514
SPAC13G7.01c	SPAC13G7.01c	2	2	2	>SPAC13G7.01c |erg7|SPAC4G9.21c|lanosterol synthase Erg7 |Schizosaccharomyces pombe|chr 1|||Manual	1	2	2	2	2.8	2.8	2.8	82.818	721	721	0.0061261	1.654	1.8416	55.997	2	12288000	5833800	6453900				81	326;2410	True;True	343;2632	520;4033	752;5786	752;5786
SPAC13G7.02c	SPAC13G7.02c	14	1	1	>SPAC13G7.02c |ssa1||heat shock protein Ssa1 |Schizosaccharomyces pombe|chr 1|||Manual	1	14	1	1	26.9	2.2	2.2	70.142	644	644	1.8105e-240	NaN	NaN	NaN	1	106130000	58515000	47615000				82	267;395;663;1268;2253;2354;2355;2433;2763;2764;3112;3169;3290;3610	False;False;False;False;False;False;False;False;False;False;True;False;False;False	282;417;702;1347;2452;2563;2564;2565;2566;2656;3012;3013;3387;3447;3585;3937	420;421;613;614;615;1127;2069;2070;3725;3876;3877;3878;3879;3880;3881;4063;4540;4541;5067;5068;5150;5151;5152;5153;5364;5365;5366;5883	596;597;598;599;890;891;892;893;1618;1619;2981;2982;2983;2984;5332;5545;5546;5547;5548;5549;5550;5551;5552;5553;5554;5555;5556;5557;5558;5831;5832;6495;6496;7227;7228;7229;7343;7344;7345;7346;7347;7348;7349;7350;7655;7656;7657;7658;7659;8429	597;893;1618;2984;5332;5548;5556;5831;6495;6496;7227;7345;7659;8429	60	59
SPAC140.01	SPAC140.01	1	1	1	>SPAC140.01 |sdh2||succinate dehydrogenase |Schizosaccharomyces pombe|chr 1|||Manual	1	1	1	1	4	4	4	31.425	275	275	0.022865	NaN	NaN	NaN	0	0	0	0				83	456	TRUE	481	711	1033	1033
SPAC140.02	SPAC140.02	3	3	3	>SPAC140.02 |gar2||nucleolar protein required for rRNA processing|Schizosaccharomyces pombe|chr 1|||Manual	1	3	3	3	9	9	9	52.987	500	500	1.3795e-12	1.153	1.4999	4.1873	2	238940000	103180000	135760000				84	1700;1820;2198	True;True;True	1821;1948;2389	2777;2949;2950;3618	3987;4239;4240;5180	3987;4239;5180	61	333
SPAC1420.02c	SPAC1420.02c	2	2	2	>SPAC1420.02c |cct5||chaperonin-containing T-complex epsilon subunit Cct5|Schizosaccharomyces pombe|chr 1|||Manual	1	2	2	2	7.5	7.5	7.5	59.377	546	546	2.6746e-19	0.8103	0.99144	22.288	3	146610000	78002000	68607000				85	119;1469	True;True	124;1564	220;221;2367	310;311;312;3402;3403	311;3402
SPAC1420.03;SPAPB8E5.02c	SPAC1420.03;SPAPB8E5.02c	3;3	3;3	3;3	>SPAC1420.03 |rpn501|rpn5-a, rpn5|19S proteasome regulatory subunit Rpn501|Schizosaccharomyces pombe|chr 1|||Manual;>SPAPB8E5.02c |rpn502|rpn5, rpn5-b|19S proteasome regulatory subunit Rpn502|Schizosaccharomyces pombe|chr 1|||Manual	2	3	3	3	13.3	13.3	13.3	51.618	443	443;443	5.8417e-73	1.0849	1.0279	24.469	3	215100000	106900000	108200000				86	90;2482;2937	True;True;True	94;2709;3195	183;4135;4815	263;264;5931;6885	264;5931;6885
SPAC144.03	SPAC144.03	2	2	2	>SPAC144.03 |ade2|min10, min3|adenylosuccinate synthetase Ade2|Schizosaccharomyces pombe|chr 1|||Manual	1	2	2	2	9.7	9.7	9.7	47.876	434	434	1.2539e-27	0.88548	0.98047	52.096	2	97851000	49325000	48526000				87	1823;3412	True;True	1951;3716	2953;5549	4244;4245;7950;7951;7952	4244;7952
SPAC144.11;SPAC31G5.03	SPAC144.11;SPAC31G5.03	3;3	3;3	3;3	>SPAC144.11 |rps1102|rps11-2, rps11|40S ribosomal protein S11 |Schizosaccharomyces pombe|chr 1|||Manual;>SPAC31G5.03 |rps1101|rps11-1|40S ribosomal protein S11 |Schizosaccharomyces pombe|chr 1|||Manual	2	3	3	3	19.7	19.7	19.7	17.5	152	152;152	8.7933e-14	0.8497	1.039	24.348	4	24223000	10875000	13348000				88	1085;1356;2283	True;True;True	1150;1448;2482	1786;1787;2216;2217;3762;3763	2569;2570;3180;3181;3182;5384;5385;5386	2569;3182;5386
SPAC144.14	SPAC144.14	2	2	2	>SPAC144.14 |klp8||kinesin-like protein Klp8|Schizosaccharomyces pombe|chr 1|||Manual	1	2	2	2	4.1	4.1	4.1	57.253	511	511	8.3988e-05	0.46491	0.51922	216.62	2	68989000	37831000	31158000				89	1283;1969	True;True	1364;2108	2095;3154	3018;4525	3018;4525
SPAC1486.04c	SPAC1486.04c	1	1	1	>SPAC1486.04c |alm1||medial ring protein Alm1|Schizosaccharomyces pombe|chr 1|||Manual	1	1	1	1	1.1	1.1	1.1	197.86	1727	1727	8.1867e-17	NaN	NaN	NaN	1	67708000	28191000	39517000				90	3352	TRUE	3653	5465	7818;7819	7818
SPAC14C4.11	SPAC14C4.11	2	2	2	>SPAC14C4.11 |||polyphosphate synthetase |Schizosaccharomyces pombe|chr 1|||Manual	1	2	2	2	3.3	3.3	3.3	85.444	734	734	1.4623e-08	0.63368	0.76862	67.427	2	51674000	27059000	24615000				91	1937;3116	True;True	2073;3393	3103;5081	4443;4444;4445;7250	4445;7250
SPAC14C4.14	SPAC14C4.14	5	5	5	>SPAC14C4.14 |atp1||F1-ATPase alpha subunit|Schizosaccharomyces pombe|chr 1|||Manual	1	5	5	5	11.4	11.4	11.4	58.587	536	536	2.3733e-64	0.76377	0.8945	9.0149	6	739270000	382740000	356530000				92	318;1082;2999;3275;3635	True;True;True;True;True	335;1147;3261;3568;3963	507;1779;1780;4900;5335;5917	733;2558;2559;2560;2561;6994;7608;8473;8474	733;2560;6994;7608;8473
SPAC1556.01c	SPAC1556.01c	1	1	1	>SPAC1556.01c |rad50|SPAP4C9.01c|DNA repair protein Rad50|Schizosaccharomyces pombe|chr 1|||Manual	1	1	1	1	1.4	1.4	1.4	149.03	1285	1285	2.061e-05	NaN	NaN	NaN	1	23726000	12878000	10848000				93	2314	TRUE	2514	3803	5441	5441
SPAC1556.02c	SPAC1556.02c	2	2	2	>SPAC1556.02c |sdh1||succinate dehydrogenase Sdh1 |Schizosaccharomyces pombe|chr 1|||Manual	1	2	2	2	4.4	4.4	4.4	70.465	641	641	4.4122e-16	0.7207	0.88253	16.739	2	121670000	63732000	57936000				94	324;1739	True;True	341;1864	516;517;2831	746;747;4070	747;4070
SPAC1565.01	SPAC1565.01	1	1	1	>SPAC1565.01 |||conserved fungal protein|Schizosaccharomyces pombe|chr 1|||Manual	1	1	1	1	11.2	11.2	11.2	27.052	242	242	0.0071974	NaN	NaN	NaN	1	30157000	22320000	7837100				95	1563	TRUE	1671	2548	3661	3661
SPAC1565.05	SPAC1565.05	8	8	8	>SPAC1565.05 |||sequence orphan|Schizosaccharomyces pombe|chr 1|||Manual	1	8	8	8	12.8	12.8	12.8	86.679	773	773	7.5314e-67	0.74014	0.87794	10.646	4	76265000	41750000	34515000				96	156;274;425;510;733;927;1117;2153	True;True;True;True;True;True;True;True	163;289;449;539;776;982;1188;2321	268;432;433;668;848;1230;1538;1842;3497	378;616;617;618;969;1231;1761;2210;2660;5009;5010	378;616;969;1231;1761;2210;2660;5009
SPAC1565.08	SPAC1565.08	9	9	9	>SPAC1565.08 |cdc48|SPAC6F12.01, dsc6|AAA family ATPase Cdc48|Schizosaccharomyces pombe|chr 1|||Manual	1	9	9	9	19.8	19.8	19.8	90.124	815	815	3.0469e-86	0.65694	0.80385	17.712	14	944940000	532450000	412500000				97	2;293;583;614;840;1430;2635;2914;3654	True;True;True;True;True;True;True;True;True	2;308;615;650;889;1524;2874;3166;3167;3984	2;3;4;460;461;462;463;1006;1007;1057;1381;2317;4356;4357;4766;4767;4768;5942	3;4;5;664;665;666;667;1443;1444;1445;1446;1447;1520;1985;3321;6237;6238;6239;6240;6802;6803;6804;6805;8514;8515	3;667;1444;1520;1985;3321;6238;6802;8515	62	364
SPAC15A10.02	SPAC15A10.02	3	3	3	>SPAC15A10.02 |taf12||transcription factor TFIID complex subunit A/ SAGA complex subunit|Schizosaccharomyces pombe|chr 1|||Manual	1	3	3	3	12.7	12.7	12.7	49.195	450	450	1.6011e-26	1.9475	2.6636	12.825	3	561410000	163480000	397930000				98	299;1120;2397	True;True;True	314;1191;2615	470;1846;1847;4000	676;2666;2667;2668;5722	676;2668;5722
SPAC1635.01	SPAC1635.01	2	2	2	>SPAC1635.01 |||mitochondrial outer membrane voltage-dependent anion-selective channel |Schizosaccharomyces pombe|chr 1|||Manual	1	2	2	2	12.8	12.8	12.8	29.653	282	282	2.4627e-28	1.0638	1.3065	10.134	3	550760000	250790000	299970000				99	414;3063	True;True	438;3331	652;4992;4993	945;946;7126;7127;7128	946;7127
SPAC1687.01	SPAC1687.01	1	1	1	>SPAC1687.01 |rpc19|rpa17, SPAPYUL23.01|DNA-directed RNA polymerase I and III subunit Rpc19|Schizosaccharomyces pombe|chr 1|||Manual	1	1	1	1	24	24	24	13.721	125	125	2.2249e-25	NaN	NaN	NaN	1	142740000	65127000	77609000				100	1262	TRUE	1341	2057	2958;2959	2959
SPAC1687.05	SPAC1687.05	4	4	4	>SPAC1687.05 |pli1||SUMO E3 ligase Pli1|Schizosaccharomyces pombe|chr 1|||Manual	1	4	4	4	5.9	5.9	5.9	80.722	727	727	2.742e-13	0.89232	1.0231	99.537	3	101260000	42026000	59238000				101	1712;2592;2721;3679	True;True;True;True	1834;2829;2967;4011	2794;4299;4487;5983	4011;6160;6424;8572	4011;6160;6424;8572
SPAC1687.06c	SPAC1687.06c	4	4	4	>SPAC1687.06c |rpl44|rpl28|60S ribosomal protein L28/L44 |Schizosaccharomyces pombe|chr 1|||Manual	1	4	4	4	39.6	39.6	39.6	14.755	134	134	2.2245e-29	0.53249	0.73472	24.44	5	200560000	128520000	72040000				102	781;2611;3026;3027	True;True;True;True	827;2849;3291;3292	1302;4324;4325;4939;4940	1872;1873;1874;1875;6190;6191;6192;6193;7051;7052;7053	1875;6190;7052;7053
SPAC16C9.06c	SPAC16C9.06c	5	5	5	>SPAC16C9.06c |upf1||ATP-dependent RNA helicase Upf1|Schizosaccharomyces pombe|chr 1|||Manual	1	5	5	5	6.5	6.5	6.5	104.53	925	925	3.1573e-27	0.78418	0.89472	11.008	5	244120000	119840000	124280000				103	1053;1336;1785;2384;3351	True;True;True;True;True	1115;1423;1912;2597;3652	1730;2187;2899;3967;5464	2487;3139;3140;4156;5681;5682;7816;7817	2487;3139;4156;5681;7816
SPAC16E8.07c	SPAC16E8.07c	1	1	1	>SPAC16E8.07c |vph1||V-type ATPase V0 subunit a |Schizosaccharomyces pombe|chr 1|||Manual	1	1	1	1	1.1	1.1	1.1	94.158	831	831	0.032328	NaN	NaN	NaN	0	0	0	0				104	963	TRUE	1019	1581	2270	2270
SPAC16E8.09	SPAC16E8.09	2	2	2	>SPAC16E8.09 |scd1|ral1|RhoGEF Scd1|Schizosaccharomyces pombe|chr 1|||Manual	1	2	2	2	3.6	3.6	3.6	99.101	872	872	2.1359e-06	0.80755	0.95496	21.029	2	32936000	16922000	16014000				105	217;3354	True;True	230;3655	353;5467	502;7821	502;7821
SPAC1751.03	SPAC1751.03	3	3	3	>SPAC1751.03 ||SPAC31A2.01|translation initiation factor eIF3m|Schizosaccharomyces pombe|chr 1|||Manual	1	3	3	3	13.4	13.4	13.4	45.085	402	402	2.4248e-13	0.85699	1.0035	1.0899	2	84487000	49931000	34556000				106	630;1909;2007	True;True;True	668;2040;2148	1082;3062;3204	1552;4388;4602	1552;4388;4602
SPAC1782.01	SPAC1782.01	1	1	1	>SPAC1782.01 |ecm29|SPAPYUG7.07|proteasome component Ecm29|Schizosaccharomyces pombe|chr 1|||Manual	1	1	1	1	0.7	0.7	0.7	190.97	1679	1679	0.0017902	NaN	NaN	NaN	1	14082000	8863400	5218500				107	1474	TRUE	1569	2374	3414	3414
SPAC1782.06c	SPAC1782.06c	3	3	3	>SPAC1782.06c |phb1||prohibitin Phb1 |Schizosaccharomyces pombe|chr 1|||Manual	1	3	3	3	20.9	20.9	20.9	31.053	282	282	8.3659e-45	0.65914	0.80004	11.941	2	100490000	59568000	40924000				108	2257;2552;3715	True;True;True	2456;2784;4050	3731;4242;6037	5340;5341;6071;8647;8648;8649;8650	5340;6071;8650
SPAC1782.07	SPAC1782.07	1	1	1	>SPAC1782.07 |qcr8||ubiquinol-cytochrome-c reductase complex subunit 7|Schizosaccharomyces pombe|chr 1|||Manual	1	1	1	1	14.1	14.1	14.1	10.467	92	92	0.013622	NaN	NaN	NaN	1	19371000	11885000	7486500				109	3331	TRUE	3629	5435	7771	7771
SPAC1783.05;SPAC3G6.01	SPAC1783.05	7;1	7;1	7;1	>SPAC1783.05 |hrp1|chd1|ATP-dependent DNA helicase Hrp1|Schizosaccharomyces pombe|chr 1|||Manual	2	7	7	7	7	7	7	158.55	1373	1373;1388	4.3038e-34	1.535	1.8817	94.448	7	253990000	85335000	168650000				110	931;980;2159;2196;3313;3506;3591	True;True;True;True;True;True;True	986;1037;2331;2387;3611;3821;3913	1543;1610;3508;3616;5406;5710;5823	2217;2308;5027;5177;5178;7714;8181;8182;8342	2217;2308;5027;5178;7714;8181;8342
SPAC1783.08c;SPCC576.11	SPAC1783.08c;SPCC576.11	4;4	4;4	4;4	>SPAC1783.08c |rpl1502|rpl15-2|60S ribosomal protein L15b |Schizosaccharomyces pombe|chr 1|||Manual;>SPCC576.11 |rpl15||60S ribosomal protein L15 |Schizosaccharomyces pombe|chr 3|||Manual	2	4	4	4	22.4	22.4	22.4	23.822	201	201;201	1.4873e-23	0.70463	0.76394	16.006	3	48348000	27888000	20460000				111	672;981;1111;1364	True;True;True;True	712;1038;1182;1456	1138;1611;1836;2226;2227	1631;1632;2309;2654;3193;3194	1631;2309;2654;3193
SPAC1786.03	SPAC1786.03	6	6	6	>SPAC1786.03 |cut11|SPAC24C9.01|spindle pole body docking protein Cut11|Schizosaccharomyces pombe|chr 1|||Manual	1	6	6	6	11.8	11.8	11.8	69.354	601	601	9.0309e-33	1.2191	1.4423	28.094	6	90339000	41515000	48823000				112	253;1322;1323;1606;3025;3756	True;True;True;True;True;True	268;1409;1410;1718;3290;4093	403;2170;2171;2610;4938;6095	573;3117;3118;3119;3745;3746;7050;8733	573;3118;3119;3746;7050;8733
SPAC17A2.01	SPAC17A2.01	1	1	1	>SPAC17A2.01 |bsu1|sod1, car1, SPAC1B1.05, bsu1|high-affinity import carrier for pyridoxine, pyridoxal, and pyridoxamine Bsu1|Schizosaccharomyces pombe|chr 1|||Manual	1	1	1	1	1.7	1.7	1.7	58.484	526	526	0.018506	NaN	NaN	NaN	1	4027000	2231900	1795100				113	2341	TRUE	2547	3854	5513	5513
SPAC17A2.02c	SPAC17A2.02c	1	1	1	>SPAC17A2.02c |||DUF887 family protein|Schizosaccharomyces pombe|chr 1|||Manual	1	1	1	1	4.5	4.5	4.5	33.042	290	290	0.00060411	NaN	NaN	NaN	1	9687400	4484700	5202700				114	2992	TRUE	3254	4891	6982	6982
SPAC17A2.03c	SPAC17A2.03c	2	2	2	>SPAC17A2.03c |vma6||V-type ATPase V0 subunit d |Schizosaccharomyces pombe|chr 1|||Manual	1	2	2	2	8.5	8.5	8.5	39.323	343	343	2.2504e-13	NaN	NaN	NaN	1	24071000	15453000	8618500				115	153;2106	True;True	160;2254	265;3352	375;4815	375;4815
SPAC17A2.13c	SPAC17A2.13c	4	4	4	>SPAC17A2.13c |rad25||14-3-3 protein Rad25|Schizosaccharomyces pombe|chr 1|||Manual	1	4	4	4	27	27	27	30.369	270	270	5.1371e-64	0.68468	0.83163	7.9361	5	235990000	123650000	112340000				116	1535;1646;2305;3773	True;True;True;True	1636;1760;1761;2504;4111	2494;2670;2671;3791;6119;6120	3587;3842;3843;3844;3845;5425;8766;8767;8768	3587;3843;5425;8766	63	28
SPAC17A5.03;SPAPB8E5.06c	SPAC17A5.03;SPAPB8E5.06c	14;14	14;14	14;14	>SPAC17A5.03 |rpl301|rpl3-1, rpl3|60S ribosomal protein L3|Schizosaccharomyces pombe|chr 1|||Manual;>SPAPB8E5.06c |rpl302|rpl3-2, rpl3-b|60S ribosomal protein L3|Schizosaccharomyces pombe|chr 1|||Manual	2	14	14	14	34	34	34	43.802	388	388;388	7.4316e-196	0.69437	0.81087	25.089	24	3009800000	1644200000	1365600000				117	80;124;192;408;1067;1501;1504;2882;2883;2884;2975;3339;3751;3752	True;True;True;True;True;True;True;True;True;True;True;True;True;True	84;129;130;203;431;1129;1598;1599;1602;3133;3134;3135;3235;3236;3637;4087;4088;4089	169;170;227;228;319;635;1749;2434;2435;2440;4715;4716;4717;4718;4719;4720;4721;4867;4868;5444;5445;6088;6089;6090	245;246;247;322;323;324;449;450;923;2514;3498;3499;3505;3506;6726;6727;6728;6729;6730;6731;6732;6733;6734;6735;6736;6737;6947;6948;6949;7784;7785;7786;7787;8724;8725;8726	245;322;449;923;2514;3499;3506;6730;6733;6737;6949;7786;8724;8726	64;65;66	179;214;323
SPAC17A5.06	SPAC17A5.06	2	2	2	>SPAC17A5.06 |ptr8||transcription factor TFIIH complex ERCC-3 subunit|Schizosaccharomyces pombe|chr 1|||Manual	1	2	2	2	3.1	3.1	3.1	91.344	804	804	6.3176e-05	NaN	NaN	NaN	1	15739000	1360700	14378000				118	1757;1876	True;True	1883;2005	2859;3017	4106;4328	4106;4328
SPAC17A5.13	SPAC17A5.13	1	1	1	>SPAC17A5.13 |||GTP cyclohydrolase |Schizosaccharomyces pombe|chr 1|||Manual	1	1	1	1	8.5	8.5	8.5	26.492	235	235	0.0077785	NaN	NaN	NaN	1	49426000	23660000	25766000				119	1015	TRUE	1074	1672	2396	2396
SPAC17A5.14	SPAC17A5.14	2	2	2	>SPAC17A5.14 |exo2||exonuclease II Exo2|Schizosaccharomyces pombe|chr 1|||Manual	1	2	2	2	2.4	2.4	2.4	152.59	1328	1328	4.0104e-14	0.97001	1.1115	69.305	3	99334000	48956000	50379000				120	538;1881	True;True	568;2010	929;930;3024	1339;1340;4336;4337	1339;4336
SPAC17A5.15c	SPAC17A5.15c	2	2	2	>SPAC17A5.15c |||glutamate-tRNA ligase |Schizosaccharomyces pombe|chr 1|||Manual	1	2	2	2	5.4	5.4	5.4	80.749	716	716	2.6032e-25	0.76868	0.94132	5.0233	2	72766000	39565000	33201000				121	1567;2265	True;True	1675;2464	2554;3740	3668;3669;5356;5357;5358	3669;5358
SPAC17C9.03	SPAC17C9.03	4	4	4	>SPAC17C9.03 |tif471||translation initiation factor eIF4G|Schizosaccharomyces pombe|chr 1|||Manual	1	4	4	4	3.2	3.2	3.2	154.03	1403	1403	8.2306e-31	0.5888	0.7182	17.512	3	152520000	91180000	61339000				122	447;448;656;1281	True;True;True;True	472;473;695;1362	700;701;1116;2093	1015;1016;1017;1018;1019;1020;1599;3016	1018;1020;1599;3016
SPAC17C9.10	SPAC17C9.10	1	1	1	>SPAC17C9.10 |stm1||G-protein coupled receptor Stm1|Schizosaccharomyces pombe|chr 1|||Manual	1	1	1	1	4.4	4.4	4.4	30.614	271	271	0.00021215	NaN	NaN	NaN	1	19468000	8832000	10636000				123	2827	TRUE	3077	4649;4650	6639;6640	6639
SPAC17G6.06	SPAC17G6.06	2	2	2	>SPAC17G6.06 |rps2401|rps24-1, rps24|40S ribosomal protein S24 |Schizosaccharomyces pombe|chr 1|||Manual	1	2	2	2	11.9	11.9	11.9	15.47	134	134	2.809e-14	0.776	0.85496	10.254	2	70121000	40323000	29798000				124	3276;3277	True;True	3569;3570	5336;5337	7609;7610;7611	7610;7611
SPAC17G6.09	SPAC17G6.09	1	1	1	>SPAC17G6.09 |sec62||ER protein translocation subcomplex subunit Sec62 |Schizosaccharomyces pombe|chr 1|||Manual	1	1	1	1	3.7	3.7	3.7	31.585	273	273	1.1121e-10	NaN	NaN	NaN	0	0	0	0				125	1864	TRUE	1993	3003;3004	4311;4312	4312
SPAC17G6.16c	SPAC17G6.16c	1	1	1	>SPAC17G6.16c |ysh1||mRNA cleavage and polyadenylation specificity factor complex endoribonuclease subunit Ysh1|Schizosaccharomyces pombe|chr 1|||Manual	1	1	1	1	1.3	1.3	1.3	85.989	757	757	0.014949	NaN	NaN	NaN	1	22348000	18408000	3940200				126	3514	TRUE	3830	5722	8199	8199
SPAC17G8.07	SPAC17G8.07	1	1	1	>SPAC17G8.07 |yaf9||YEATS family histone acetyltransferase subunit Yaf9|Schizosaccharomyces pombe|chr 1|||Manual	1	1	1	1	7.4	7.4	7.4	24.946	217	217	1.8736e-26	NaN	NaN	NaN	0	0	0	0				127	1215	TRUE	1289	1981	2850	2850
SPAC17H9.05	SPAC17H9.05	1	1	1	>SPAC17H9.05 |ebp2||rRNA processing protein Ebp2 |Schizosaccharomyces pombe|chr 1|||Manual	1	1	1	1	6	6	6	37.818	333	333	1.8444e-07	NaN	NaN	NaN	1	81407000	18985000	62422000				128	1983	TRUE	2122	3175	4560	4560
SPAC17H9.12c	SPAC17H9.12c	1	1	1	>SPAC17H9.12c |||mitochondrial cytochrome c-heme linkage protein Cyc2 |Schizosaccharomyces pombe|chr 1|||Manual	1	1	1	1	7.9	7.9	7.9	29.375	266	266	0.0070603	NaN	NaN	NaN	1	27532000	19191000	8340400				129	1442	TRUE	1537	2335	3347	3347
SPAC17H9.13c	SPAC17H9.13c	2	2	2	>SPAC17H9.13c |||glutamate 5-kinase |Schizosaccharomyces pombe|chr 1|||Manual	1	2	2	2	3.2	3.2	3.2	43.933	402	402	9.8416e-11	0.55608	0.6994	7.395	2	109900000	71433000	38463000				130	1062;1386	True;True	1124;1478	1743;2255	2505;2506;3234	2505;3234
SPAC1805.05	SPAC1805.05	2	2	2	>SPAC1805.05 |cki3||serine/threonine protein kinase Cki3|Schizosaccharomyces pombe|chr 1|||Manual	1	2	2	2	5.2	5.2	5.2	50.214	439	439	2.0002e-06	NaN	NaN	NaN	1	47480000	19808000	27672000				131	2834;3094	True;True	3084;3368	4658;5042	6650;6651;7194	6651;7194
SPAC1805.06c	SPAC1805.06c	1	1	1	>SPAC1805.06c |hem2||porphobilinogen synthase Hem2 |Schizosaccharomyces pombe|chr 1|||Manual	1	1	1	1	3	3	3	36.12	329	329	0.0062695	NaN	NaN	NaN	1	10965000	6912000	4052800				132	647	TRUE	686	1106	1587	1587
SPAC1805.11c	SPAC1805.11c	2	1	1	>SPAC1805.11c |rps2602|rps26-2|40S ribosomal protein S26 |Schizosaccharomyces pombe|chr 1|||Manual	1	2	1	1	17.6	10.1	10.1	13.862	119	119	6.3263e-06	NaN	NaN	NaN	1	6817700	3888700	2929000				133	1977;2332	True;False	2116;2537	3167;3841	4545;5496	4545;5496
SPAC1805.13	SPAC1805.13	5	5	5	>SPAC1805.13 |rpl14||60S ribosomal protein L14 |Schizosaccharomyces pombe|chr 1|||Manual	1	5	5	5	31.3	31.3	31.3	15.21	134	134	5.4046e-71	0.73429	0.89357	21.45	10	1419000000	741140000	677830000				134	1684;2935;3584;3748;3749	True;True;True;True;True	1804;3192;3193;3905;4083;4084;4085	2747;2748;2749;2750;4811;4812;4813;5813;6080;6081;6082;6083;6084;6085;6086	3944;3945;3946;3947;3948;6879;6880;6881;6882;6883;8328;8715;8716;8717;8718;8719;8720;8721;8722	3945;6879;8328;8716;8719	67;68	63;114
SPAC1805.17	SPAC1805.17	2	2	2	>SPAC1805.17 |crm1|caf2, SPAC1B2.01|importin family nuclear export receptor Crm1|Schizosaccharomyces pombe|chr 1|||Manual	1	2	2	2	2	2	2	123.57	1078	1078	6.3162e-06	NaN	NaN	NaN	1	10450000	4044200	6405700				135	4;3759	True;True	4;4096	6;6099	7;8739	7;8739
SPAC1834.02	SPAC1834.02	17	17	17	>SPAC1834.02 |aro1||pentafunctional aromatic polypeptide Aro1 |Schizosaccharomyces pombe|chr 1|||Manual	1	17	17	17	15.8	15.8	15.8	173.78	1573	1573	7.535e-124	0.81724	0.96137	54.903	12	742360000	385600000	356760000				136	379;673;708;756;757;918;1055;1313;1438;1687;2304;2320;2543;3164;3322;3507;3516	True;True;True;True;True;True;True;True;True;True;True;True;True;True;True;True;True	398;713;751;801;802;973;1117;1399;1533;1808;2503;2520;2772;3442;3620;3822;3832	583;1139;1194;1268;1269;1526;1732;2158;2330;2755;3790;3809;4220;5145;5416;5711;5724;5725	842;1633;1634;1716;1819;1820;2192;2489;2490;3098;3339;3340;3953;5424;5447;5448;6045;7336;7728;7729;8183;8184;8201;8202;8203	842;1633;1716;1819;1820;2192;2489;3098;3339;3953;5424;5447;6045;7336;7728;8184;8202
SPAC1834.03c;SPBC1105.12;SPBC8D2.03c	SPAC1834.03c;SPBC1105.12;SPBC8D2.03c	11;11;11	11;11;11	11;11;11	>SPAC1834.03c |hhf1|h4.1|histone H4 h4.1|Schizosaccharomyces pombe|chr 1|||Manual;>SPBC1105.12 |hhf3|h4.3|histone H4 h4.3|Schizosaccharomyces pombe|chr 2|||Manual;>SPBC8D2.03c |hhf2|ams3, h4.2|histone H4 h4.2|Schizosaccharomyces pombe|chr 2|||Manual	3	11	11	11	67	67	67	11.423	103	103;103;103	1.3363e-80	1.431	1.7704	23.056	16	4063600000	1432900000	2630700000				137	406;1324;1402;1403;1608;1718;1719;1720;3167;3315;3316	True;True;True;True;True;True;True;True;True;True;True	429;1411;1494;1495;1721;1840;1841;1842;3445;3613;3614	632;633;2172;2279;2280;2281;2282;2614;2615;2800;2801;2802;2803;5148;5408;5409;5410	919;920;921;3120;3266;3267;3268;3269;3752;3753;3754;3755;4019;4020;4021;4022;4023;4024;4025;4026;4027;7341;7716;7717;7718;7719;7720;7721	919;3120;3266;3269;3753;4019;4023;4026;7341;7716;7721
SPAC1834.04;SPBC1105.11c;SPBC8D2.04	SPAC1834.04;SPBC1105.11c;SPBC8D2.04	3;3;3	3;3;3	3;3;3	>SPAC1834.04 |hht1||histone H3 h3.1|Schizosaccharomyces pombe|chr 1|||Manual;>SPBC1105.11c |hht3|h3.3|histone H3 h3.3|Schizosaccharomyces pombe|chr 2|||Manual;>SPBC8D2.04 |hht2|h3.2|histone H3 h3.2|Schizosaccharomyces pombe|chr 2|||Manual	3	3	3	3	34.6	34.6	34.6	15.357	136	136;136;136	3.1134e-21	0.98654	1.126	158.08	3	89196000	69136000	20060000				138	540;773;2974	True;True;True	570;818;3234	932;1288;4866	1342;1845;6946	1342;1845;6946
SPAC1834.08	SPAC1834.08	6	6	6	>SPAC1834.08 |mak1|phk3|histidine kinase Mak1|Schizosaccharomyces pombe|chr 1|||Manual	1	6	6	6	5.9	5.9	5.9	184.58	1639	1639	1.3766e-71	0.60714	0.68743	30.003	4	271660000	166160000	105500000				139	359;453;824;902;1803;2855	True;True;True;True;True;True	377;478;873;957;1931;3105	561;707;1360;1501;2922;4684	806;1026;1027;1028;1958;2154;2155;4193;6680;6681	806;1028;1958;2154;4193;6681
SPAC1834.11c	SPAC1834.11c	2	2	2	>SPAC1834.11c |sec18||secretory pathway protein Sec18 |Schizosaccharomyces pombe|chr 1|||Manual	1	2	2	2	3.2	3.2	3.2	87.553	792	792	4.0262e-10	1.1264	1.2904	116.48	2	87851000	32910000	54940000				140	943;2231	True;True	998;2427	1558;3669	2238;5257;5258	2238;5257
SPAC1851.02	SPAC1851.02	2	2	2	>SPAC1851.02 |slc1||1-acylglycerol-3-phosphate O-acyltransferase Slc1 |Schizosaccharomyces pombe|chr 1|||Manual	1	2	2	2	8.2	8.2	8.2	31.393	279	279	1.8444e-07	0.72255	0.85442	34.821	2	34417000	20220000	14197000				141	349;3489	True;True	367;3803	549;5690	793;8157	793;8157
SPAC1851.03	SPAC1851.03	1	1	1	>SPAC1851.03 |ckb1||CK2 family regulatory subunit Ckb1|Schizosaccharomyces pombe|chr 1|||Manual	1	1	1	1	6.1	6.1	6.1	26.677	231	231	0.0019906	NaN	NaN	NaN	1	24501000	9500000	15001000				142	1207	TRUE	1279	1970	2838	2838
SPAC18B11.03c	SPAC18B11.03c	1	1	1	>SPAC18B11.03c |||N-acetyltransferase |Schizosaccharomyces pombe|chr 1|||Manual	1	1	1	1	3.4	3.4	3.4	50.516	447	447	0.011181	NaN	NaN	NaN	1	66484000	21619000	44864000				143	3134	TRUE	3412	5111	7289	7289
SPAC18B11.08c	SPAC18B11.08c	2	2	2	>SPAC18B11.08c |||conserved fungal protein|Schizosaccharomyces pombe|chr 1|||Manual	1	2	2	2	15.8	15.8	15.8	10.295	95	95	1.1307e-06	NaN	NaN	NaN	1	199030000	108880000	90144000				144	247;2610	True;True	261;2848	394;4323	558;6189	558;6189
SPAC18B11.10	SPAC18B11.10	2	2	2	>SPAC18B11.10 |tup11||transcriptional corepressor Tup11|Schizosaccharomyces pombe|chr 1|||Manual	1	2	2	2	8	8	8	67.33	614	614	3.4253e-09	1.0243	1.3254	9.1603	2	46903000	22188000	24715000				145	282;1734	True;True	297;1858	442;2824	629;630;4060	629;4060
SPAC18G6.05c	SPAC18G6.05c	9	9	9	>SPAC18G6.05c |||translation elongation regulator Gcn1 |Schizosaccharomyces pombe|chr 1|||Manual	1	9	9	9	4.5	4.5	4.5	297.33	2670	2670	1.3411e-84	0.69837	0.80069	32.93	7	126460000	75790000	50672000				146	93;1674;1955;1956;1989;2285;2967;3265;3377	True;True;True;True;True;True;True;True;True	97;1790;2094;2095;2128;2484;3227;3557;3679	187;2728;3138;3139;3182;3765;4858;5322;5499	269;3920;4500;4501;4502;4503;4570;5389;6935;7591;7871	269;3920;4500;4503;4570;5389;6935;7591;7871
SPAC18G6.07c	SPAC18G6.07c	1	1	1	>SPAC18G6.07c |mra1||ribosome biogenesis protein Mra1|Schizosaccharomyces pombe|chr 1|||Manual	1	1	1	1	3.1	3.1	3.1	39.775	359	359	4.1088e-07	NaN	NaN	NaN	1	34913000	18864000	16049000				147	782	TRUE	828	1303	1876;1877	1877
SPAC18G6.14c	SPAC18G6.14c	5	5	5	>SPAC18G6.14c |rps7||40S ribosomal protein S7 |Schizosaccharomyces pombe|chr 1|||Manual	1	5	5	5	37.9	37.9	37.9	21.947	195	195	1.2985e-42	0.7969	0.94317	24.529	8	1377800000	726980000	650820000				148	165;1503;2394;3216;3401	True;True;True;True;True	174;1601;2612;3498;3705	280;281;2438;2439;3996;5221;5222;5532;5533	397;398;399;400;3502;3503;3504;5716;7439;7440;7441;7442;7443;7928;7929;7930	400;3502;5716;7443;7929
SPAC1952.05	SPAC1952.05	7	7	7	>SPAC1952.05 |gcn5|kat2|SAGA complex histone acetyltransferase catalytic subunit Gcn5|Schizosaccharomyces pombe|chr 1|||Manual	1	7	7	7	18.9	18.9	18.9	51.975	454	454	1.8732e-93	2.2282	2.4757	23.064	14	2453900000	698230000	1755600000				149	852;1003;1004;1039;1289;3652;3776	True;True;True;True;True;True;True	901;1062;1063;1099;1100;1370;3981;3982;4114	1404;1405;1406;1655;1656;1657;1707;1708;1709;1710;1711;1712;2105;5939;5940;6123	2020;2021;2022;2368;2369;2370;2371;2372;2373;2374;2375;2451;2452;2453;2454;2455;2456;2457;2458;2459;2460;3031;3032;8509;8510;8511;8771	2022;2370;2372;2455;3032;8510;8771	69;70	134;211
SPAC1952.09c	SPAC1952.09c	2	2	2	>SPAC1952.09c |||acetyl-CoA hydrolase |Schizosaccharomyces pombe|chr 1|||Manual	1	2	2	2	3.3	3.3	3.3	57.915	521	521	1.9342e-08	0.67927	0.93203	22.919	2	63018000	37176000	25842000				150	1309;1310	True;True	1393;1394	2152;2153	3092;3093	3092;3093
SPAC1952.11c	SPAC1952.11c	1	1	1	>SPAC1952.11c |ure2||urease Ure2|Schizosaccharomyces pombe|chr 1|||Manual	1	1	1	1	2	2	2	91.181	835	835	0.0086495	NaN	NaN	NaN	1	6623800	4920900	1702900				151	570	TRUE	601	983	1413	1413
SPAC1952.16	SPAC1952.16	1	1	1	>SPAC1952.16 |rga9||RhoGAP, GTPase activator towards Rho/Rac/Cdc42-like small GTPases |Schizosaccharomyces pombe|chr 1|||Manual	1	1	1	1	2.8	2.8	2.8	76.867	670	670	1.537e-08	NaN	NaN	NaN	1	44351000	23988000	20363000				152	1798	TRUE	1926	2914;2915	4176;4177;4178;4179	4176
SPAC19A8.04	SPAC19A8.04	2	2	2	>SPAC19A8.04 |erg5||C-22 sterol desaturase Erg5|Schizosaccharomyces pombe|chr 1|||Manual	1	2	2	2	5.2	5.2	5.2	62.27	543	543	3.4927e-16	NaN	NaN	NaN	1	99857000	50755000	49101000				153	1127;1991	True;True	1199;2130	1856;3184	2683;4573	2683;4573
SPAC19A8.08	SPAC19A8.08	2	2	2	>SPAC19A8.08 |upf2||nonsense-mediated decay protein Upf2|Schizosaccharomyces pombe|chr 1|||Manual	1	2	2	2	3.1	3.1	3.1	122.09	1049	1049	3.1167e-16	NaN	NaN	NaN	1	11750000	7019500	4730000				154	1329;1814	True;True	1416;1942	2178;2936	3127;4218	3127;4218
SPAC19A8.15	SPAC19A8.15	2	2	2	>SPAC19A8.15 |trp2||tryptophan synthase |Schizosaccharomyces pombe|chr 1|||Manual	1	2	2	2	2.9	2.9	2.9	75.436	697	697	3.2002e-05	NaN	NaN	NaN	1	83620000	46519000	37101000				155	1236;2340	True;True	1312;2546	2017;3853	2902;5512	2902;5512
SPAC19B12.04;SPBC19G7.03c	SPAC19B12.04;SPBC19G7.03c	4;4	4;4	4;4	>SPAC19B12.04 |rps3001|rps30-1|40S ribosomal protein S30 |Schizosaccharomyces pombe|chr 1|||Manual;>SPBC19G7.03c |rps3002|rps30-2, rps30|40S ribosomal protein S30 |Schizosaccharomyces pombe|chr 2|||Manual	2	4	4	4	21.3	21.3	21.3	6.9101	61	61;61	2.1932e-26	0.78694	0.95973	15.283	7	465150000	215790000	249360000				156	821;822;2573;2574	True;True;True;True	869;870;871;2806;2807	1355;1356;1357;1358;4269;4270;4271	1952;1953;1954;1955;1956;6114;6115;6116;6117	1953;1956;6116;6117	71	50
SPCC622.08c;SPAC19G12.06c	SPCC622.08c;SPAC19G12.06c	4;4	4;4	4;4	>SPCC622.08c |hta1||histone H2A alpha|Schizosaccharomyces pombe|chr 3|||Manual;>SPAC19G12.06c |hta2||histone H2A beta|Schizosaccharomyces pombe|chr 1|||Manual	2	4	4	4	50	50	50	13.878	132	132;131	5.7817e-102	1.5007	1.9249	27.25	8	3839400000	1364800000	2474500000				157	1095;1858;2220;3411	True;True;True;True	1160;1987;2415;3715	1800;1801;1802;1803;2997;3654;3655;5547;5548	2594;2595;2596;2597;2598;2599;2600;2601;2602;4305;5234;5235;5236;5237;7948;7949	2600;4305;5237;7949
SPAC19G12.08	SPAC19G12.08	2	2	2	>SPAC19G12.08 |scs7||sphingosine hydroxylase Scs7|Schizosaccharomyces pombe|chr 1|||Manual	1	2	2	2	6.6	6.6	6.6	40.229	347	347	0.00014797	NaN	NaN	NaN	1	4310800	2165800	2145000				158	499;2811	True;True	528;3061	832;4608	1209;6584	1209;6584
SPAC19G12.17	SPAC19G12.17	1	1	1	>SPAC19G12.17 |new10||enhancer of rudimentary homolog|Schizosaccharomyces pombe|chr 1|||Manual	1	1	1	1	10.6	10.6	10.6	12.204	104	104	0.015385	0.63497	0.81728	3.4272	2	8209000	4357600	3851400				159	3261	TRUE	3552	5314;5315	7582;7583	7582
SPAC1A6.04c	SPAC1A6.04c	1	1	1	>SPAC1A6.04c |plb1||phospholipase B homolog Plb1|Schizosaccharomyces pombe|chr 1|||Manual	1	1	1	1	2.1	2.1	2.1	67.118	613	613	2.5808e-06	NaN	NaN	NaN	1	47879000	17429000	30450000				160	2980	TRUE	3241	4875	6961	6961
SPAC1A6.09c	SPAC1A6.09c	1	1	1	>SPAC1A6.09c |lag1||sphingosine N-acyltransferase Lag1|Schizosaccharomyces pombe|chr 1|||Manual	1	1	1	1	2.8	2.8	2.8	45.668	390	390	0.048954	NaN	NaN	NaN	1	8740200	5384300	3355900				161	3185	TRUE	3465	5177	7383	7383
SPAC1B1.01	SPAC1B1.01	1	1	1	>SPAC1B1.01 |deb1|rdp1|transcription factor Deb1/Rdp1|Schizosaccharomyces pombe|chr 1|||Manual	1	1	1	1	4.8	4.8	4.8	51.766	478	478	2.8571e-20	NaN	NaN	NaN	1	95154000	29536000	65618000				162	2308	TRUE	2508	3796	5432	5432
SPAC1B2.03c	SPAC1B2.03c	3	3	3	>SPAC1B2.03c |||GNS1/SUR4 family protein |Schizosaccharomyces pombe|chr 1|||Manual	1	3	3	3	17.1	17.1	17.1	38.337	334	334	6.639e-29	0.80227	0.74017	57.204	3	357010000	186630000	170380000				163	43;2119;3148	True;True;True	46;2273;3426	78;3424;5128	111;112;4916;7312	112;4916;7312
SPAC1B3.12c	SPAC1B3.12c	1	1	1	>SPAC1B3.12c |rpb10||DNA-directed RNA polymerase I, II, and III subunit Rpb10|Schizosaccharomyces pombe|chr 1|||Manual	1	1	1	1	15.5	15.5	15.5	8.2757	71	71	2.3689e-05	NaN	NaN	NaN	1	25972000	12700000	13272000				164	2138	TRUE	2302	3468	4969;4970	4970
SPAC1B3.13	SPAC1B3.13	2	2	2	>SPAC1B3.13 |||U3 snoRNP-associated protein Nan1 |Schizosaccharomyces pombe|chr 1|||Manual	1	2	2	2	3.7	3.7	3.7	88.937	806	806	4.0268e-07	0.78678	0.92867	36.804	2	14621000	7917600	6703000				165	382;3693	True;True	401;4025	586;6002	845;8596	845;8596
SPAC1B3.14	SPAC1B3.14	1	1	1	>SPAC1B3.14 |vma3||V-type ATPase V0 subunit c |Schizosaccharomyces pombe|chr 1|||Manual	1	1	1	1	11.2	11.2	11.2	16.325	161	161	0.0013224	0.72656	0.88278	6.5723	2	85524000	51465000	34059000				166	116	TRUE	120;121	216;217	305;306	306
SPAC1B3.16c	SPAC1B3.16c	3	3	3	>SPAC1B3.16c |vht1||vitamin H transporter Vth1|Schizosaccharomyces pombe|chr 1|||Manual	1	3	3	3	4.9	4.9	4.9	62.821	568	568	3.7229e-09	0.91532	1.085	11.888	3	85766000	43680000	42085000				167	2874;3702;3758	True;True;True	3125;4034;4095	4705;6014;6098	6709;8610;8737;8738	6709;8610;8738
SPAC1D4.04	SPAC1D4.04	3	3	3	>SPAC1D4.04 |cct2||chaperonin-containing T-complex beta subunit Cct2|Schizosaccharomyces pombe|chr 1|||Manual	1	3	3	3	9.9	9.9	9.9	56.676	527	527	6.5424e-19	0.69929	0.80064	4.5828	2	102670000	50049000	52623000				168	137;2013;2018	True;True;True	143;2155;2160	242;3211;3216	341;4610;4617;4618	341;4610;4617
SPAC1D4.08	SPAC1D4.08	1	1	1	>SPAC1D4.08 |pis1||CDP-diacylglycerol--inositol 3-phosphatidyltransferase Pis1 |Schizosaccharomyces pombe|chr 1|||Manual	1	1	1	1	6.8	6.8	6.8	28.366	251	251	1.9932e-18	1.055	1.1354	6.0894	2	154460000	71990000	82469000				169	2451	TRUE	2677	4093;4094	5871;5872;5873;5874;5875	5872
SPAC1F12.07	SPAC1F12.07	4	4	4	>SPAC1F12.07 |||phosphoserine aminotransferase |Schizosaccharomyces pombe|chr 1|||Manual	1	4	4	4	12.3	12.3	12.3	42.797	389	389	4.9405e-46	0.83902	0.80933	34.469	5	256710000	144340000	112370000				170	1202;1776;2596;2886	True;True;True;True	1274;1903;2833;3137	1963;1964;2887;4304;4723	2830;2831;2832;4142;6166;6740;6741	2830;4142;6166;6740
SPAC1F3.09	SPAC1F3.09	1	1	1	>SPAC1F3.09 |mug161||CwfJ family protein, splicing factor |Schizosaccharomyces pombe|chr 1|||Manual	1	1	1	1	2.3	2.3	2.3	63.216	561	561	0.00022085	NaN	NaN	NaN	1	18764000	9238200	9525500				171	3443	TRUE	3748	5594	8017	8017
SPAC1F5.06	SPAC1F5.06	1	1	1	>SPAC1F5.06 |lsh1||ER heat shock protein Lhs1 |Schizosaccharomyces pombe|chr 1|||Manual	1	1	1	1	1.9	1.9	1.9	94.897	848	848	0.0015861	NaN	NaN	NaN	1	10417000	6637700	3779700				172	13	TRUE	13	32	47	47
SPAC1F5.11c	SPAC1F5.11c	44	41	41	>SPAC1F5.11c |tra2||phosphatidylinositol kinase-related protein Tra2|Schizosaccharomyces pombe|chr 1|||Manual	1	44	41	41	14.1	13.7	13.7	420.78	3655	3655	6.4537e-224	0.64401	0.73619	33.539	41	1223200000	707850000	515370000				173	146;196;213;261;358;385;396;576;742;789;829;1040;1125;1176;1217;1494;1536;1558;1704;1790;1792;1906;1910;1911;1912;2083;2162;2200;2230;2306;2318;2322;2365;2387;2671;2873;2875;3070;3072;3214;3397;3404;3433;3834	True;True;True;True;True;True;True;True;True;True;True;True;True;True;True;True;True;True;True;True;True;True;False;False;False;True;True;True;True;True;True;True;True;True;True;True;True;True;True;True;True;True;True;True	153;207;225;276;376;405;418;608;787;835;878;1101;1197;1248;1291;1590;1637;1666;1826;1917;1919;1920;2037;2041;2042;2043;2229;2336;2393;2425;2426;2505;2518;2522;2577;2600;2601;2912;3124;3126;3338;3340;3496;3701;3708;3738;4176	256;325;347;413;560;591;616;994;995;1243;1312;1366;1713;1714;1854;1919;1920;1983;2426;2495;2538;2539;2784;2905;2907;2908;3058;3063;3064;3065;3066;3067;3308;3515;3626;3667;3668;3792;3807;3811;3812;3897;3970;3971;4411;4704;4706;5002;5005;5006;5007;5219;5528;5540;5581;6217	364;365;460;494;587;588;805;853;894;1426;1427;1428;1781;1889;1967;2461;2462;2679;2771;2772;2852;3485;3486;3588;3648;3649;3998;4165;4168;4169;4382;4389;4390;4391;4392;4393;4394;4395;4396;4754;5037;5196;5255;5256;5426;5445;5450;5451;5452;5579;5686;5687;5688;5689;6318;6319;6707;6708;6710;7144;7148;7149;7150;7436;7437;7922;7938;7998;7999;8911;8912	365;460;494;587;805;853;894;1428;1781;1889;1967;2462;2679;2771;2852;3485;3588;3649;3998;4165;4169;4382;4390;4392;4395;4754;5037;5196;5255;5426;5445;5450;5579;5688;6318;6707;6710;7144;7150;7437;7922;7938;7999;8911	72;73;74	423;1777;3365
SPAC1F7.02c	SPAC1F7.02c	5	5	5	>SPAC1F7.02c |has1||ATP-dependent RNA helicase Has1 |Schizosaccharomyces pombe|chr 1|||Manual	1	5	5	5	11.9	11.9	11.9	65.261	578	578	3.563e-31	0.8927	0.99783	35.686	5	148910000	76885000	72026000				174	558;2759;2785;2856;3179	True;True;True;True;True	589;3008;3035;3106;3457	963;964;4536;4564;4685;5167;5168	1387;1388;6490;6527;6682;7369;7370	1388;6490;6527;6682;7370	75	439
SPAC1F7.05	SPAC1F7.05	5	5	5	>SPAC1F7.05 |cdc22||ribonucleoside reductase large subunit Cdc22|Schizosaccharomyces pombe|chr 1|||Manual	1	5	5	5	9.6	9.6	9.6	91.998	811	811	2.2071e-64	0.81277	0.93655	16.021	6	438130000	236270000	201860000				175	1119;2534;2631;3365;3408	True;True;True;True;True	1190;2763;2870;3667;3712	1844;1845;4207;4208;4350;5484;5544	2663;2664;2665;6028;6029;6227;7848;7944;7945	2665;6029;6227;7848;7945
SPAC1F7.13c;SPBC2F12.07c;SPBC839.04	SPAC1F7.13c;SPBC2F12.07c;SPBC839.04	3;3;3	3;3;3	3;3;3	>SPAC1F7.13c |rpl801|rpl8-1, rpl18, rpk5a, rpl2-1, SPAC21E11.02c|60S ribosomal protein L8 |Schizosaccharomyces pombe|chr 1|||Manual;>SPBC2F12.07c |rpl802|rpl8-2, rpk37, rpk5b|60S ribosomal protein L8 |Schizosaccharomyces pombe|chr 2|||Manual;>SPBC839.04 |r	3	3	3	3	21.7	21.7	21.7	27.1	253	253;253;253	6.3569e-28	0.62551	0.76368	22.764	4	1163600000	646050000	517590000				176	1032;2203;2731	True;True;True	1092;2396;2977	1695;1696;1697;3629;4499	2431;2432;2433;2434;2435;2436;5200;6437	2432;5200;6437
SPAC1F8.07c	SPAC1F8.07c	15	15	15	>SPAC1F8.07c |||pyruvate decarboxylase |Schizosaccharomyces pombe|chr 1|||Manual	1	15	15	15	43.8	43.8	43.8	61.547	568	568	4.8049e-236	0.91546	0.99662	69.563	29	4046900000	2351000000	1695900000				177	5;21;553;671;865;1084;1383;1644;2062;2063;2421;3117;3168;3677;3678	True;True;True;True;True;True;True;True;True;True;True;True;True;True;True	5;22;584;711;914;1149;1475;1758;2207;2208;2643;3394;3446;4007;4008;4009;4010	7;43;44;45;956;957;1137;1434;1783;1784;1785;2251;2252;2667;2668;3273;3274;3275;3276;3277;4050;5082;5083;5149;5972;5973;5974;5975;5976;5977;5978;5979;5980;5981;5982	8;64;65;66;67;68;69;70;1376;1377;1629;1630;2056;2564;2565;2566;2567;2568;3227;3228;3229;3230;3838;3839;3840;4704;4705;4706;4707;4708;4709;4710;4711;4712;5815;7251;7252;7342;8554;8555;8556;8557;8558;8559;8560;8561;8562;8563;8564;8565;8566;8567;8568;8569;8570;8571	8;66;1376;1630;2056;2566;3229;3839;4704;4710;5815;7252;7342;8564;8571	76;77	9;331
SPAC20G4.01	SPAC20G4.01	2	2	2	>SPAC20G4.01 |caf16|SPAC22F8.13|CCR4-Not complex subunit Caf16 |Schizosaccharomyces pombe|chr 1|||Manual	1	2	2	2	7.5	7.5	7.5	31.292	280	280	0.0058777	1.3061	1.5926	41.224	2	33487000	14249000	19238000				178	679;3430	True;True	719;3735	1146;5574	1644;7984	1644;7984
SPAC20G4.07c	SPAC20G4.07c	1	1	1	>SPAC20G4.07c |sts1|erg4|C-24|Schizosaccharomyces pombe|chr 1|||Manual	1	1	1	1	2.4	2.4	2.4	52.545	453	453	0.00030649	NaN	NaN	NaN	0	0	0	0				179	1174	TRUE	1246	1917	2769	2769
SPAC20G4.08	SPAC20G4.08	1	1	1	>SPAC20G4.08 ||SPAC4F10.01|conserved fungal protein|Schizosaccharomyces pombe|chr 1|||Manual	1	1	1	1	2.3	2.3	2.3	119.23	1076	1076	0.010608	NaN	NaN	NaN	1	18736000	12140000	6595400				180	3819	TRUE	4160	6194	8881;8882	8881
SPAC20G8.03	SPAC20G8.03	2	2	2	>SPAC20G8.03 |itr2||MFS myo-inositol transporter|Schizosaccharomyces pombe|chr 1|||Manual	1	2	2	2	3.9	3.9	3.9	61.136	557	557	3.2459e-05	1.4074	1.5692	25.491	2	18904000	7023000	11881000				181	1243;3596	True;True	1320;3918	2033;5829	2922;2923;8348	2923;8348
SPAC20G8.04c	SPAC20G8.04c	1	1	1	>SPAC20G8.04c |||mitochondrial electron transfer flavoprotein-ubiquinone oxidoreductase |Schizosaccharomyces pombe|chr 1|||Manual	1	1	1	1	2.4	2.4	2.4	69.472	632	632	1.1352e-05	NaN	NaN	NaN	1	28384000	19783000	8601500				182	2734	TRUE	2981	4505	6444	6444
SPAC20G8.06	SPAC20G8.06	13	13	13	>SPAC20G8.06 |not1||CCR4-Not complex subunit Not1 |Schizosaccharomyces pombe|chr 1|||Manual	1	13	13	13	9.3	9.3	9.3	237.13	2100	2100	6.2797e-105	0.64484	0.75486	27	13	475440000	282660000	192780000				183	222;528;685;723;1673;1871;2270;2297;2696;3235;3236;3288;3729	True;True;True;True;True;True;True;True;True;True;True;True;True	235;558;725;766;1788;1789;2000;2469;2496;2940;3524;3525;3583;4064	358;914;1154;1210;2726;2727;3011;3746;3781;3782;4451;4452;5270;5271;5272;5360;5361;6054	507;1319;1320;1657;1658;1740;3918;3919;4320;4321;5366;5410;5411;5412;6373;6374;7511;7512;7513;7514;7515;7649;7650;8676	507;1320;1658;1740;3918;4321;5366;5411;6373;7511;7515;7649;8676
SPAC20G8.09c	SPAC20G8.09c	10	10	10	>SPAC20G8.09c |||ribosome biogenesis ATPase |Schizosaccharomyces pombe|chr 1|||Manual	1	10	10	10	15.3	15.3	15.3	116.46	1033	1033	4.0607e-68	0.83343	1.0106	22.005	12	394000000	208860000	185130000				184	471;482;753;1653;1947;2002;2047;3136;3141;3142	True;True;True;True;True;True;True;True;True;True	498;509;798;1768;2085;2142;2192;3414;3419;3420	736;737;749;1262;2679;3125;3126;3198;3256;5113;5119;5120	1076;1077;1095;1811;3855;4483;4484;4485;4486;4592;4593;4681;4682;4683;7291;7300;7301	1077;1095;1811;3855;4484;4593;4683;7291;7300;7301
SPAC222.07c	SPAC222.07c	8	8	8	>SPAC222.07c |hri2||eIF2 alpha kinase Hri2|Schizosaccharomyces pombe|chr 1|||Manual	1	8	8	8	17.2	17.2	17.2	73.366	639	639	1.1453e-56	0.98093	1.279	18.84	10	1003500000	478070000	525460000				185	775;1713;1796;1833;2137;2593;2919;3760	True;True;True;True;True;True;True;True	821;1835;1924;1961;2301;2830;3172;4097	1294;2795;2912;2970;3467;4300;4776;4777;4778;6100	1857;1858;1859;4012;4013;4174;4269;4270;4968;6161;6162;6817;6818;6819;6820;6821;8740	1859;4013;4174;4270;4968;6162;6818;8740	78	399
SPAC222.09	SPAC222.09	1	1	1	>SPAC222.09 |seb1||RNA-binding protein Seb1|Schizosaccharomyces pombe|chr 1|||Manual	1	1	1	1	1.9	1.9	1.9	66.439	620	620	0.0074757	NaN	NaN	NaN	1	15571000	5799500	9771800				186	1737	TRUE	1861	2827	4065	4065
SPAC222.12c	SPAC222.12c	9	9	9	>SPAC222.12c |atp2||F1-ATPase beta subunit Atp2|Schizosaccharomyces pombe|chr 1|||Manual	1	9	9	9	31.8	31.8	31.8	56.875	525	525	5.6237e-187	0.81884	0.84706	17.719	10	752890000	412220000	340670000				187	755;1000;1301;1372;2606;2793;3298;3353;3823	True;True;True;True;True;True;True;True;True	800;1059;1383;1464;2844;3043;3594;3654;4164	1265;1266;1267;1652;2141;2142;2237;4318;4577;5380;5381;5466;6199	1814;1815;1816;1817;1818;2362;2363;3076;3077;3208;3209;6183;6541;6542;7679;7680;7820;8887;8888;8889	1816;2362;3077;3209;6183;6541;7680;7820;8889
SPAC222.14c	SPAC222.14c	2	2	2	>SPAC222.14c |||GTP binding protein Sey1 |Schizosaccharomyces pombe|chr 1|||Manual	1	2	2	2	2.5	2.5	2.5	87.509	762	762	2.6228e-08	NaN	NaN	NaN	1	13801000	6620700	7180200				188	2185;3184	True;True	2370;3464	3588;5176	5145;7382	5145;7382
SPAC227.18	SPAC227.18	3	3	3	>SPAC227.18 |lys3|SPAC2F7.01|saccharopine dehydrogenase Lys3|Schizosaccharomyces pombe|chr 1|||Manual	1	3	3	3	16.3	16.3	16.3	41.392	368	368	5.5725e-12	2.5857	3.1735	13.307	2	250140000	58162000	191980000				189	606;1030;1226	True;True;True	642;1090;1301	1046;1693;1996	1508;2428;2871;2872	1508;2428;2872
SPAC22A12.04c;SPAC5D6.01	SPAC22A12.04c;SPAC5D6.01	7;7	7;7	7;7	>SPAC22A12.04c |rps2201|rps22-1, rps15a-1|40S ribosomal protein S15a |Schizosaccharomyces pombe|chr 1|||Manual;>SPAC5D6.01 |rps2202|rps22-2, rps15a-2|40S ribosomal protein S15a |Schizosaccharomyces pombe|chr 1|||Manual	2	7	7	7	40.8	40.8	40.8	14.76	130	130;130	1.347e-66	0.7803	1.0043	9.4134	10	1191300000	590880000	600440000				190	394;1460;1816;2531;2532;3582;3583	True;True;True;True;True;True;True	416;1555;1944;2760;2761;3903;3904	612;2357;2939;2940;2941;2942;4203;4204;4205;5810;5811;5812	889;3382;4221;4222;4223;4224;4225;4226;4227;4228;4229;6023;6024;6025;6026;8322;8323;8324;8325;8326;8327	889;3382;4229;6025;6026;8325;8327
SPAC22A12.07c	SPAC22A12.07c	1	1	1	>SPAC22A12.07c |ogm1|oma1|protein O-mannosyltransferase Ogm1|Schizosaccharomyces pombe|chr 1|||Manual	1	1	1	1	1.6	1.6	1.6	101.33	893	893	0.0052069	NaN	NaN	NaN	1	6825000	2719300	4105700				191	20	TRUE	21	42	60;61;62;63	62
SPAC22A12.10	SPAC22A12.10	2	2	2	>SPAC22A12.10 |||diacylglycerol cholinephosphotransferase/ diacylglycerol ethanolaminesphotransferase |Schizosaccharomyces pombe|chr 1|||Manual	1	2	2	2	6.2	6.2	6.2	44.083	386	386	0.00041002	0.91406	1.0028	22.851	2	65993000	30798000	35196000				192	3763;3815	True;True	4100;4156	6104;6190	8744;8876	8744;8876
SPAC22A12.15c	SPAC22A12.15c	9	9	9	>SPAC22A12.15c |bip1|bip|ER heat shock protein BiP|Schizosaccharomyces pombe|chr 1|||Manual	1	9	9	9	14.5	14.5	14.5	73.226	663	663	7.0657e-102	0.85517	0.93242	14.921	12	1072000000	512230000	559740000				193	170;802;1439;1465;1521;1550;3218;3568;3569	True;True;True;True;True;True;True;True;True	179;180;848;1534;1560;1621;1658;3500;3888;3889	286;287;288;289;1329;2331;2332;2362;2473;2529;5224;5791;5792;5793	406;407;408;409;1916;1917;3341;3342;3343;3390;3391;3555;3636;7446;7447;8296;8297;8298;8299	406;1916;3343;3391;3555;3636;7447;8296;8297	79	337
SPAC22A12.16	SPAC22A12.16	2	2	2	>SPAC22A12.16 |||ATP-citrate synthase subunit 2 |Schizosaccharomyces pombe|chr 1|||Manual	1	2	2	2	7.7	7.7	7.7	53.942	492	492	3.4436e-12	NaN	NaN	NaN	1	40240000	25065000	15175000				194	294;1929	True;True	309;2065	464;3092	668;4427	668;4427
SPAC22E12.07	SPAC22E12.07	1	1	1	>SPAC22E12.07 |rna1||Ran GAP Rna1|Schizosaccharomyces pombe|chr 1|||Manual	1	1	1	1	5.4	5.4	5.4	43.235	386	386	1.2171e-55	NaN	NaN	NaN	1	12308000	4981600	7326800				195	835	TRUE	884	1374;1375	1977;1978	1978
SPAC22F3.07c	SPAC22F3.07c	2	2	2	>SPAC22F3.07c |atp20||F0-ATPase subunit G |Schizosaccharomyces pombe|chr 1|||Manual	1	2	2	2	22	22	22	13.64	118	118	9.6736e-11	0.86919	0.99382	38.649	3	61929000	42363000	19566000				196	584;1164	True;True	616;1236	1008;1009;1902	1448;1449;1450;1451;2746	1450;2746
SPAC22F3.13	SPAC22F3.13	2	2	2	>SPAC22F3.13 |tsc1||hamartin|Schizosaccharomyces pombe|chr 1|||Manual	1	2	2	2	2	2	2	103.43	899	899	1.4231e-08	0.83998	0.99336	14.847	2	46630000	24900000	21730000				197	1343;3301	True;True	1432;3597	2197;5385	3153;3154;7684	3154;7684
SPAC22F8.08	SPAC22F8.08	3	3	3	>SPAC22F8.08 |sec24|sfb2|COPII cargo receptor Sec24/Sfb2 subunit|Schizosaccharomyces pombe|chr 1|||Manual	1	3	3	3	4.9	4.9	4.9	101.9	926	926	2.5415e-31	0.79605	0.94179	5.9928	2	33352000	18549000	14803000				198	1885;2448;2823	True;True;True	2014;2674;3073	3030;4090;4644	4345;5868;6634	4345;5868;6634
SPAC22G7.06c	SPAC22G7.06c	47	47	47	>SPAC22G7.06c |ura1||carbamoyl-phosphate synthase |Schizosaccharomyces pombe|chr 1|||Manual	1	47	47	47	30.5	30.5	30.5	248.31	2244	2244	0	0.72692	0.88811	31.189	53	5339500000	2824500000	2515000000				199	125;221;232;430;505;509;547;649;747;748;813;924;925;977;1056;1077;1185;1219;1242;1303;1340;1657;1749;1754;1755;1838;1865;2004;2031;2043;2098;2588;2674;2736;2741;2865;2997;3032;3086;3190;3268;3311;3503;3606;3629;3761;3814	True;True;True;True;True;True;True;True;True;True;True;True;True;True;True;True;True;True;True;True;True;True;True;True;True;True;True;True;True;True;True;True;True;True;True;True;True;True;True;True;True;True;True;True;True;True;True	131;234;245;246;454;534;538;578;688;792;793;861;979;980;1034;1118;1139;1257;1293;1319;1385;1386;1429;1772;1874;1880;1881;1966;1994;2144;2174;2188;2245;2824;2917;2918;2983;2988;3116;3259;3297;3359;3470;3560;3608;3609;3818;3933;3957;4098;4155	229;357;369;370;371;674;840;846;847;943;1108;1251;1252;1347;1533;1534;1535;1536;1607;1733;1734;1762;1933;1985;1986;2031;2032;2144;2145;2194;2683;2684;2847;2855;2856;2857;2975;3005;3200;3232;3251;3252;3336;4294;4422;4423;4507;4514;4696;4896;4897;4946;5033;5182;5325;5401;5402;5403;5707;5877;5878;5907;5908;6101;6189	325;506;522;523;524;976;977;1220;1227;1228;1229;1230;1354;1589;1793;1794;1795;1941;1942;1943;2203;2204;2205;2206;2207;2208;2305;2491;2492;2493;2494;2530;2787;2855;2856;2857;2919;2920;2921;3079;3080;3148;3860;3861;4089;4101;4102;4103;4277;4313;4596;4597;4640;4673;4674;4675;4795;4796;6152;6333;6334;6335;6336;6337;6446;6459;6697;6988;6989;6990;7063;7183;7389;7595;7596;7597;7708;7709;7710;7711;8177;8…	325;506;523;977;1220;1230;1354;1589;1793;1794;1943;2204;2208;2305;2493;2530;2787;2855;2920;3079;3148;3861;4089;4101;4103;4277;4313;4596;4640;4673;4795;6152;6335;6446;6459;6697;6989;7063;7183;7389;7597;7710;8178;8422;8463;8741;8875	80;81;82;83;84	22;344;1122;1385;1960
SPAC22H12.04c	SPAC22H12.04c	9	9	9	>SPAC22H12.04c |rps102|rps1-2, rps3a-2|40S ribosomal protein S3a |Schizosaccharomyces pombe|chr 1|||Manual	1	9	9	9	33.7	33.7	33.7	28.521	252	252	1.9872e-121	0.78233	0.95425	12.488	17	3071700000	1587900000	1483800000				200	290;291;626;1296;1297;1516;1802;2670;3633	True;True;True;True;True;True;True;True;True	305;306;664;1378;1379;1614;1930;2911;3961	455;456;457;1076;1077;2130;2131;2132;2133;2134;2457;2458;2921;4409;4410;5914;5915	655;656;657;658;659;660;1543;1544;1545;1546;3058;3059;3060;3061;3062;3063;3064;3065;3528;3529;4190;4191;4192;6314;6315;6316;6317;8469;8470;8471	655;659;1546;3059;3065;3528;4191;6314;8471
SPAC23A1.08c;SPCC1322.15	SPAC23A1.08c;SPCC1322.15	2;2	2;2	2;2	>SPAC23A1.08c |rpl3401|rpl34, rpl34-1|60S ribosomal protein L34|Schizosaccharomyces pombe|chr 1|||Manual;>SPCC1322.15 |rpl3402|rpl34, rpl34-2|60S ribosomal protein L34|Schizosaccharomyces pombe|chr 3|||Manual	2	2	2	2	25	25	25	12.87	112	112;111	1.3492e-21	0.71234	0.85524	11.082	3	432660000	197780000	234880000				201	74;360	True;True	78;378	162;163;562	231;232;233;234;807;808	233;808
SPAC23A1.10;SPBC839.15c;SPCC794.09c	SPAC23A1.10;SPBC839.15c;SPCC794.09c	23;23;23	23;23;23	23;23;23	>SPAC23A1.10 |tef102|ef1a-b|translation elongation factor EF-1 alpha Ef1a-b|Schizosaccharomyces pombe|chr 1|||Manual;>SPBC839.15c |ef1a-c||translation elongation factor EF-1 alpha Ef1a-c|Schizosaccharomyces pombe|chr 2|||Manual;>SPCC794.09c |ef1a-a||transl	3	23	23	23	54.8	54.8	54.8	49.674	460	460;460;460	0	0.72563	0.80703	20.054	68	17810000000	9296100000	8513400000				202	418;533;599;650;661;662;670;881;882;913;914;1223;1224;2120;2199;2484;2998;3009;3197;3309;3390;3803;3804	True;True;True;True;True;True;True;True;True;True;True;True;True;True;True;True;True;True;True;True;True;True;True	442;563;634;689;700;701;710;932;933;968;969;1298;1299;2274;2390;2391;2392;2711;3260;3271;3272;3477;3605;3606;3693;3694;4142;4143	656;657;658;920;921;1033;1034;1035;1109;1110;1122;1123;1124;1125;1126;1136;1455;1456;1457;1458;1459;1460;1461;1462;1463;1513;1514;1515;1516;1517;1518;1519;1520;1993;1994;3425;3619;3620;3621;3622;3623;3624;3625;4137;4898;4899;4911;4912;4913;4914;4915;4916;4917;5191;5192;5193;5194;5195;5395;5396;5397;5398;5517;5518;5519;5520;5521;6165;6166;6167;6168;6169;6170;6171	951;952;953;954;955;1329;1330;1331;1488;1489;1490;1491;1492;1493;1590;1591;1592;1608;1609;1610;1611;1612;1613;1614;1615;1616;1617;1628;2082;2083;2084;2085;2086;2087;2088;2089;2090;2091;2092;2093;2094;2095;2171;2172;2173;2174;2175;2176;2177;2178;2179;2180;2181;2182;2183;2867;2868;2869;4917;4918;5181;5182;5183;5184;5185;5186;5187;5188;5189;5190;5191;5192;5193;5194;5195;5933;6991;6992;6993;7010;7011…	951;1331;1492;1592;1611;1616;1628;2087;2095;2177;2182;2867;2869;4917;5191;5933;6992;7015;7400;7702;7911;8837;8844	85;86;87;88;89;90;91	155;206;274;292;402;408;427
SPAC23A1.11;SPBC839.13c	SPAC23A1.11;SPBC839.13c	2;2	2;2	2;2	>SPAC23A1.11 |rpl1602|rpl16-2|60S ribosomal protein L13/L16 |Schizosaccharomyces pombe|chr 1|||Manual;>SPBC839.13c |rpl1601||60S ribosomal protein L13/L16 |Schizosaccharomyces pombe|chr 2|||Manual	2	2	2	2	14.2	14.2	14.2	22.005	197	197;197	5.7181e-39	NaN	NaN	NaN	0	0	0	0				203	974;3658	True;True	1031;3988	1600;5949	2298;8523	2298;8523
SPAC23A1.14c	SPAC23A1.14c	2	2	2	>SPAC23A1.14c |||uncharacterised trans-sulfuration enzyme |Schizosaccharomyces pombe|chr 1|||Manual	1	2	2	2	9.5	9.5	9.5	43.284	398	398	7.0415e-06	NaN	NaN	NaN	1	49758000	28475000	21283000				204	345;1072	True;True	363;1134	543;1756	781;2522	781;2522
SPAC23C11.02c;SPBP4H10.13	SPAC23C11.02c;SPBP4H10.13	5;5	5;5	5;5	>SPAC23C11.02c |rps23||40S ribosomal protein S23 |Schizosaccharomyces pombe|chr 1|||Manual;>SPBP4H10.13 |rps2302|rps23-2|40S ribosomal protein S23 |Schizosaccharomyces pombe|chr 2|||Manual	2	5	5	5	34.3	34.3	34.3	15.655	143	143;143	1.1991e-47	0.83092	1.0177	36.143	6	267460000	146180000	121280000				205	1619;1861;3347;3348;3607	True;True;True;True;True	1732;1990;3647;3648;3934	2626;3000;5459;5460;5879;5880	3771;4308;7808;7809;7810;8424;8425;8426	3771;4308;7809;7810;8425
SPAC23C11.05	SPAC23C11.05	2	2	2	>SPAC23C11.05 |||inorganic pyrophosphatase |Schizosaccharomyces pombe|chr 1|||Manual	1	2	2	2	10.4	10.4	10.4	32.467	289	289	2.1973e-09	0.68484	0.81229	4.7874	2	126560000	63718000	62846000				206	2242;3151	True;True	2438;3429	3704;5131	5302;7316;7317	5302;7316
SPAC23C11.09	SPAC23C11.09	1	1	1	>SPAC23C11.09 |ala1|ars1|mitochondrial and cytoplasmic alanine-tRNA ligase Ala1 |Schizosaccharomyces pombe|chr 1|||Manual	1	1	1	1	1.1	1.1	1.1	107.38	959	959	0.0059767	NaN	NaN	NaN	1	28875000	18453000	10422000				207	693	TRUE	734	1165	1669	1669
SPAC23C11.11	SPAC23C11.11	4	4	4	>SPAC23C11.11 |cka1|orb5|serine/threonine protein kinase Cka1|Schizosaccharomyces pombe|chr 1|||Manual	1	4	4	4	21.1	21.1	21.1	39.527	332	332	2.8404e-42	0.70477	0.82189	38.749	4	206840000	114260000	92580000				208	923;1321;2819;3502	True;True;True;True	978;1408;3069;3817	1532;2169;4640;5705;5706	2202;3116;6628;8175;8176	2202;3116;6628;8175
SPAC23C11.14	SPAC23C11.14	1	1	1	>SPAC23C11.14 |zhf1|zhf|zinc ion transporter Zhf1|Schizosaccharomyces pombe|chr 1|||Manual	1	1	1	1	3.9	3.9	3.9	42.941	387	387	7.3876e-26	NaN	NaN	NaN	1	42093000	24585000	17508000				209	2640	TRUE	2880	4364;4365	6250;6251	6251
SPAC23C11.16	SPAC23C11.16	4	4	4	>SPAC23C11.16 |plo1||Polo kinase Plo1|Schizosaccharomyces pombe|chr 1|||Manual	1	4	4	4	10.8	10.8	10.8	77.301	683	683	3.0384e-58	2.9643	3.3995	20.453	3	386540000	148120000	238420000				210	1227;2287;2367;3786	True;True;True;True	1302;2486;2579;4125	1997;1998;3768;3899;6144	2873;2874;5392;5582;8802;8803	2874;5392;5582;8802	92	145
SPAC23C4.11	SPAC23C4.11	1	1	1	>SPAC23C4.11 |atp18||F0-ATPase subunit J |Schizosaccharomyces pombe|chr 1|||Manual	1	1	1	1	11.7	11.7	11.7	6.8049	60	60	0.0095268	NaN	NaN	NaN	1	23885000	7812500	16073000				211	2701	TRUE	2945	4457	6380	6380
SPAC23C4.12	SPAC23C4.12	2	2	1	>SPAC23C4.12 |hhp2||serine/threonine protein kinase Hhp2|Schizosaccharomyces pombe|chr 1|||Manual	1	2	2	1	6.5	6.5	3.5	45.831	400	400	1.102e-10	7.2089	8.7981	53.084	2	39989000	3062600	36926000				212	945;3304	True;True	1000;3600	1561;5388	2241;7688	2241;7688
SPAC23D3.02	SPAC23D3.02	1	1	1	>SPAC23D3.02 |rfc2||DNA replication factor C complex subunit Rfc2|Schizosaccharomyces pombe|chr 1|||Manual	1	1	1	1	3.2	3.2	3.2	37.876	340	340	0.0018041	NaN	NaN	NaN	1	16588000	9225500	7362300				213	2786	TRUE	3036	4565	6528	6528
SPAC23D3.04c	SPAC23D3.04c	1	1	1	>SPAC23D3.04c |gpd2||glycerol-3-phosphate dehydrogenase Gpd2|Schizosaccharomyces pombe|chr 1|||Manual	1	1	1	1	3.2	3.2	3.2	40.874	373	373	2.6046e-07	NaN	NaN	NaN	1	49970000	18853000	31117000				214	3159	TRUE	3437	5140	7329	7329
SPAC23D3.06c	SPAC23D3.06c	1	1	1	>SPAC23D3.06c |nup146||nucleoporin Nup146|Schizosaccharomyces pombe|chr 1|||Manual	1	1	1	1	1.2	1.2	1.2	145.78	1325	1325	0.002922	2.0008	2.4416	13.776	2	28075000	7937000	20138000				215	422	TRUE	446	664;665	962;963	963
SPAC23D3.09	SPAC23D3.09	1	1	1	>SPAC23D3.09 |arp42|arp4|SWI/SNF and RSC complex subunit Arp42|Schizosaccharomyces pombe|chr 1|||Manual	1	1	1	1	4.7	4.7	4.7	47.1	424	424	1.9053e-08	NaN	NaN	NaN	1	28052000	13650000	14402000				216	2516	TRUE	2745	4187	6002;6003	6003
SPAC23D3.12	SPAC23D3.12	3	3	3	>SPAC23D3.12 |||inorganic phosphate transporter |Schizosaccharomyces pombe|chr 1|||Manual	1	3	3	3	6.8	6.8	6.8	62.315	559	559	2.2736e-18	0.56754	0.69461	4.3315	4	52329000	32410000	19919000				217	1141;1972;3579	True;True;True	1213;2111;3900	1871;3159;3160;5806	2705;4531;4532;8317	2705;4531;8317
SPAC23E2.01	SPAC23E2.01	1	1	1	>SPAC23E2.01 |fep1|gaf2|iron-sensing transcription factor Fep1|Schizosaccharomyces pombe|chr 1|||Manual	1	1	1	1	2	2	2	60.611	564	564	1.401e-06	NaN	NaN	NaN	1	47523000	12882000	34641000				218	2398	TRUE	2616	4001	5723;5724	5724
SPAC23G3.01	SPAC23G3.01	9	9	9	>SPAC23G3.01 |rpb2|SPAC521.06|RNA polymerase II complex subunit Rpb2|Schizosaccharomyces pombe|chr 1|||Manual	1	9	9	9	9.9	9.9	9.9	137.85	1210	1210	1.1416e-94	0.61749	0.79478	39.181	7	261490000	141860000	119630000				219	22;70;539;1229;1500;1570;1702;3410;3828	True;True;True;True;True;True;True;True;True	23;74;569;1305;1596;1597;1679;1823;3714;4169	46;157;931;2003;2432;2433;2560;2779;5546;6205	71;225;226;1341;2880;3495;3496;3497;3677;3989;7947;8897	71;226;1341;2880;3496;3677;3989;7947;8897	93	367
SPAC23G3.02c	SPAC23G3.02c	16	16	16	>SPAC23G3.02c |sib1||ferrichrome synthetase Sib1|Schizosaccharomyces pombe|chr 1|||Manual	1	16	16	16	3.3	3.3	3.3	559.84	4924	4924	5.4021e-65	0.62995	0.71877	43.569	15	192480000	104280000	88206000				220	452;1279;1292;1302;1426;1437;1576;1654;1655;1769;1868;2486;2922;3074;3201;3409	True;True;True;True;True;True;True;True;True;True;True;True;True;True;True;True	477;1359;1373;1384;1519;1520;1532;1686;1769;1770;1895;1997;2713;3175;3343;3482;3713	706;2088;2108;2143;2312;2313;2329;2569;2680;2681;2873;3008;4139;4783;5011;5200;5545	1025;3011;3035;3078;3313;3314;3315;3316;3338;3687;3856;3857;4123;4317;5935;6828;7154;7412;7946	1025;3011;3035;3078;3313;3338;3687;3856;3857;4123;4317;5935;6828;7154;7412;7946
SPAC23G3.04	SPAC23G3.04	1	1	1	>SPAC23G3.04 |ies4||Ino80 complex subunit Ies4|Schizosaccharomyces pombe|chr 1|||Manual	1	1	1	1	7.2	7.2	7.2	21.142	194	194	0.0074649	NaN	NaN	NaN	1	27961000	6864500	21097000				221	2698	TRUE	2942	4454	6377	6377
SPAC23G3.06	SPAC23G3.06	15	15	15	>SPAC23G3.06 |||U3 snoRNP protein Nop58 |Schizosaccharomyces pombe|chr 1|||Manual	1	15	15	15	44.1	44.1	44.1	55.758	508	508	2.1007e-233	1.1285	1.1994	22.683	24	2759900000	1251300000	1508600000				222	260;397;669;910;1269;1759;1772;1886;2174;2510;2829;2921;3376;3577;3738	True;True;True;True;True;True;True;True;True;True;True;True;True;True;True	275;419;709;965;1348;1885;1898;1899;2015;2354;2355;2739;3079;3174;3678;3897;3898;4073	412;617;618;1134;1135;1510;2071;2861;2878;2879;2880;2881;3031;3565;3566;3567;3568;4180;4652;4782;5498;5803;5804;6065;6066	586;895;896;897;1626;1627;2167;2168;2985;2986;4108;4109;4129;4130;4131;4132;4133;4134;4135;4136;4346;5114;5115;5116;5117;5118;5119;5991;5992;6643;6826;6827;7870;8314;8315;8693;8694;8695	586;897;1626;2168;2985;4108;4135;4346;5119;5992;6643;6826;7870;8315;8694	94;95;96	195;280;307
SPAC23G3.10c	SPAC23G3.10c	2	2	2	>SPAC23G3.10c |ssr3||SWI/SNF and RSC complex subunit Ssr3|Schizosaccharomyces pombe|chr 1|||Manual	1	2	2	2	8	8	8	49.759	425	425	6.4711e-09	0.94413	1.191	28.266	2	43247000	17464000	25783000				223	219;2753	True;True	232;3002	355;4529	504;6480	504;6480
SPAC23G3.11	SPAC23G3.11	2	2	2	>SPAC23G3.11 |rpn6||19S proteasome regulatory subunit Rpn6 |Schizosaccharomyces pombe|chr 1|||Manual	1	2	2	2	7.1	7.1	7.1	47.341	421	421	4.2205e-26	0.8852	1.048	21.873	2	64937000	32406000	32531000				224	2325;2745	True;True	2525;2992	3818;3819;4518	5462;5463;6464	5463;6464
SPAC23H3.09c	SPAC23H3.09c	1	1	1	>SPAC23H3.09c |gly1||threonine aldolase Gly1 |Schizosaccharomyces pombe|chr 1|||Manual	1	1	1	1	4.3	4.3	4.3	41.318	376	376	1.5583e-11	NaN	NaN	NaN	1	64825000	34012000	30813000				225	1452	TRUE	1547	2346	3365;3366	3366
SPAC23H4.06	SPAC23H4.06	1	1	1	>SPAC23H4.06 |gln1||glutamate-ammonia ligase Gln1|Schizosaccharomyces pombe|chr 1|||Manual	1	1	1	1	4.2	4.2	4.2	40.018	359	359	8.2888e-09	NaN	NaN	NaN	1	60478000	25709000	34769000				226	3534	TRUE	3851	5745	8230;8231;8232	8231
SPAC23H4.10c	SPAC23H4.10c	8	8	8	>SPAC23H4.10c |thi4||thiamine-phosphate dipyrophosphorylase/hydroxyethylthiazole kinase|Schizosaccharomyces pombe|chr 1|||Manual	1	8	8	8	16.8	16.8	16.8	55.565	518	518	6.059e-168	0.91052	0.94982	22.411	14	1420900000	691610000	729250000				227	250;446;1178;1815;2584;2816;2960;3457	True;True;True;True;True;True;True;True	265;471;1250;1943;2819;3066;3220;3766	399;400;699;1923;1924;2937;2938;4288;4617;4618;4846;4847;4848;5636;5637;5638	566;567;568;569;1013;1014;2775;2776;2777;4219;4220;6142;6143;6598;6599;6600;6919;6920;6921;6922;8073;8074;8075;8076;8077	567;1013;2775;4219;6142;6600;6920;8077
SPAC24C9.12c	SPAC24C9.12c	6	6	6	>SPAC24C9.12c |||glycine hydroxymethyltransferase |Schizosaccharomyces pombe|chr 1|||Manual	1	6	6	6	18.6	18.6	18.6	51.86	467	467	3.7122e-54	0.4425	0.43324	32.634	8	761390000	519070000	242320000				228	611;1404;1926;3493;3494;3835	True;True;True;True;True;True	647;1496;2060;2061;3807;3808;4177	1053;1054;2283;3087;3088;5695;5696;6218	1516;1517;3270;4421;4422;4423;8162;8163;8164;8913	1516;3270;4423;8162;8164;8913	97	125
SPAC24H6.04	SPAC24H6.04	1	1	1	>SPAC24H6.04 |hxk1||hexokinase 1|Schizosaccharomyces pombe|chr 1|||Manual	1	1	1	1	4.5	4.5	4.5	53.597	484	484	2.6729e-09	NaN	NaN	NaN	1	40425000	21178000	19246000				229	3210	TRUE	3492	5214	7428	7428
SPBC29A3.12;SPAC24H6.07	SPBC29A3.12;SPAC24H6.07	4;4	4;4	4;4	>SPBC29A3.12 |rps902|rps9-2, rps9b|40S ribosomal protein S9 |Schizosaccharomyces pombe|chr 2|||Manual;>SPAC24H6.07 |rps901|rps9-1, rps9a|40S ribosomal protein S9|Schizosaccharomyces pombe|chr 1|||Manual	2	4	4	4	21.4	21.4	21.4	22.245	192	192;191	7.8301e-12	0.67878	0.8263	15.667	5	153660000	79654000	74001000				230	577;1651;2143;2463	True;True;True;True	609;1766;2308;2690	996;2677;3476;3477;4112	1429;3852;4980;4981;4982;5900;5901	1429;3852;4981;5901
SPAC25B8.11	SPAC25B8.11	1	1	1	>SPAC25B8.11 |||transcription factor |Schizosaccharomyces pombe|chr 1|||Manual	1	1	1	1	1.5	1.5	1.5	74.715	654	654	0.0072516	NaN	NaN	NaN	0	0	0	0				231	86	TRUE	90	176	255	255
SPAC25G10.05c	SPAC25G10.05c	2	2	2	>SPAC25G10.05c |his1||ATP phosphoribosyltransferase|Schizosaccharomyces pombe|chr 1|||Manual	1	2	2	2	11.9	11.9	11.9	34.029	310	310	1.9452e-13	0.768	0.88453	13.342	2	33173000	16258000	16915000				232	275;1478	True;True	290;1573	434;2378	619;3419;3420	619;3419
SPAC25G10.08	SPAC25G10.08	6	6	6	>SPAC25G10.08 |||translation initiation factor eIF3b |Schizosaccharomyces pombe|chr 1|||Manual	1	6	6	6	12.7	12.7	12.7	84.034	725	725	3.1731e-36	0.72471	0.92446	28.589	6	366010000	199250000	166760000				233	2268;2441;2976;3037;3472;3626	True;True;True;True;True;True	2467;2665;3237;3302;3781;3954	3743;4079;4869;4952;5661;5904	5361;5854;5855;6950;6951;7069;8113;8114;8458;8459	5361;5854;6951;7069;8114;8459
SPAC26A3.04;SPAC3A12.10	SPAC26A3.04;SPAC3A12.10	5;5	5;5	5;5	>SPAC26A3.04 |rpl2002|rpl20, rpl20-2|60S ribosomal protein L20 |Schizosaccharomyces pombe|chr 1|||Manual;>SPAC3A12.10 |rpl2001|rpl20-1, rpl20, yl17b, rpl18a-2|60S ribosomal protein L20a |Schizosaccharomyces pombe|chr 1|||Manual	2	5	5	5	31.2	31.2	31.2	20.599	176	176;176	6.5498e-33	0.63845	0.7824	14.351	3	96202000	56108000	40094000				234	204;288;1609;2949;3399	True;True;True;True;True	216;303;1722;3207;3703	336;453;2616;4832;4833;5530	479;653;3756;6903;6904;7925;7926	479;653;3756;6904;7925
SPAC26A3.05	SPAC26A3.05	14	14	14	>SPAC26A3.05 |chc1||clathrin heavy chain Chc1 |Schizosaccharomyces pombe|chr 1|||Manual	1	14	14	14	12.3	12.3	12.3	190.02	1666	1666	5.6227e-106	0.50886	0.62119	25.381	13	349940000	203920000	146010000				235	104;169;258;832;1152;1640;1675;1822;1854;1875;2614;3468;3525;3735	True;True;True;True;True;True;True;True;True;True;True;True;True;True	108;178;273;881;1224;1754;1791;1950;1983;2004;2852;3777;3841;4070	201;285;409;1370;1888;2662;2729;2952;2992;3015;3016;4328;5655;5735;6061	288;405;581;1972;2725;3831;3921;4242;4243;4299;4326;4327;6198;8103;8104;8217;8686	288;405;581;1972;2725;3831;3921;4242;4299;4327;6198;8104;8217;8686	98	601
SPAC26A3.07c;SPBC17G9.10	SPAC26A3.07c;SPBC17G9.10	2;2	2;2	2;2	>SPAC26A3.07c |rpl1101|rpl11-1, rpl11|60S ribosomal protein L11 |Schizosaccharomyces pombe|chr 1|||Manual;>SPBC17G9.10 |rpl1102|rpl11-2|60S ribosomal protein L11 |Schizosaccharomyces pombe|chr 2|||Manual	2	2	2	2	15.5	15.5	15.5	19.891	174	174;174	8.1565e-19	0.81148	0.87177	13.478	3	538930000	259610000	279320000				236	1354;2073	True;True	1446;2218	2212;3293;3294	3173;3174;4733;4734	3174;4734
SPAC26A3.10	SPAC26A3.10	1	1	1	>SPAC26A3.10 |cnt6||centaurin ADOP ribosylation factor GTPase activating protein family |Schizosaccharomyces pombe|chr 1|||Manual	1	1	1	1	1.7	1.7	1.7	104.5	923	923	0.0021788	NaN	NaN	NaN	1	12298000	8538700	3759000				237	3406	TRUE	3710	5542	7941	7941
SPAC26F1.03	SPAC26F1.03	37	37	37	>SPAC26F1.03 |pda1||pyruvate dehydrogenase e1 component alpha subunit Pda1 |Schizosaccharomyces pombe|chr 1|||Manual	1	37	37	37	81.4	81.4	81.4	45.137	409	409	0	2.6974	2.9797	34.683	119	85519000000	19473000000	66047000000				238	26;242;243;364;465;853;877;919;961;962;984;985;987;1078;1079;1080;1148;1194;1387;1388;1529;1530;1630;1696;1697;2093;2094;2234;2364;2579;2590;2591;2771;2951;2952;3777;3831	True;True;True;True;True;True;True;True;True;True;True;True;True;True;True;True;True;True;True;True;True;True;True;True;True;True;True;True;True;True;True;True;True;True;True;True;True	27;256;257;382;492;902;927;928;974;1017;1018;1041;1042;1043;1045;1140;1141;1142;1143;1144;1145;1220;1266;1479;1480;1629;1630;1631;1743;1744;1817;1818;2239;2240;2241;2430;2576;2813;2814;2827;2828;3020;3021;3209;3210;4115;4116;4172;4173	51;52;384;385;386;387;388;566;728;1407;1408;1409;1410;1411;1412;1413;1414;1415;1416;1417;1418;1419;1450;1451;1527;1579;1580;1614;1615;1616;1617;1618;1619;1620;1621;1622;1623;1624;1625;1626;1627;1628;1630;1763;1764;1765;1766;1767;1768;1769;1770;1771;1772;1773;1774;1775;1776;1777;1881;1882;1883;1884;1943;1944;1945;1946;1947;1948;1949;1950;1951;2256;2257;2258;2482;2483;2484;2485;2486;2639;2640;2641;…	78;79;80;544;545;546;547;548;549;550;551;815;1065;1066;2023;2024;2025;2026;2027;2028;2029;2030;2031;2032;2033;2034;2035;2036;2075;2076;2077;2193;2194;2195;2267;2268;2269;2312;2313;2314;2315;2316;2317;2318;2319;2320;2321;2322;2323;2324;2325;2326;2327;2328;2329;2330;2331;2332;2334;2531;2532;2533;2534;2535;2536;2537;2538;2539;2540;2541;2542;2543;2544;2545;2546;2547;2548;2549;2550;2551;2552;2553;2554…	79;544;550;815;1066;2024;2075;2194;2267;2269;2328;2332;2334;2534;2541;2556;2717;2804;3235;3237;3570;3575;3802;3973;3979;4780;4786;5281;5575;6133;6157;6159;6506;6906;6908;8782;8905	99;100;101;102;103;104;105;106;107	156;170;227;246;256;274;299;342;362
SPAC26F1.06	SPAC26F1.06	3	3	3	>SPAC26F1.06 |gpm1||monomeric 2,3-bisphosphoglycerate |Schizosaccharomyces pombe|chr 1|||Manual	1	3	3	3	19.9	19.9	19.9	23.765	211	211	1.4744e-19	0.90829	1.1006	31.047	5	213390000	102460000	110930000				239	199;1043;3504	True;True;True	210;211;1104;3819	328;329;330;1718;5708	465;466;467;468;469;2467;8179	467;2467;8179	108	172
SPAC26F1.13c	SPAC26F1.13c	2	2	2	>SPAC26F1.13c |lrs1||cytoplasmic leucine-tRNA ligase Lrs1 |Schizosaccharomyces pombe|chr 1|||Manual	1	2	2	2	3.7	3.7	3.7	126.45	1111	1111	4.924e-08	0.74774	0.78823	21.264	2	99035000	54422000	44613000				240	1033;2553	True;True	1093;2785	1698;4243	2437;6072	2437;6072
SPBC336.10c;SPAC26H5.10c	SPBC336.10c;SPAC26H5.10c	1;1	1;1	1;1	>SPBC336.10c |tif512||translation elongation factor eIF5A |Schizosaccharomyces pombe|chr 2|||Manual;>SPAC26H5.10c |tif51||translation elongation factor eIF5A |Schizosaccharomyces pombe|chr 1|||Manual	2	1	1	1	7.1	7.1	7.1	18.563	169	169;157	1.8702e-07	NaN	NaN	NaN	1	18989000	11543000	7446200				241	3434	TRUE	3739	5582	8000	8000
SPAC27D7.07c	SPAC27D7.07c	1	1	1	>SPAC27D7.07c |smd1||Sm snRNP core protein Smd1|Schizosaccharomyces pombe|chr 1|||Manual	1	1	1	1	18.8	18.8	18.8	13.089	117	117	4.4405e-23	NaN	NaN	NaN	0	0	0	0				242	3838	TRUE	4180	6222	8918	8918
SPAC27D7.14c	SPAC27D7.14c	1	1	1	>SPAC27D7.14c |tpr1|SPAC637.02c|RNA polymerase II associated Paf1 complex subunit Tpr1|Schizosaccharomyces pombe|chr 1|||Manual	1	1	1	1	0.9	0.9	0.9	119.15	1039	1039	0.00040617	NaN	NaN	NaN	1	38248000	16965000	21283000				243	69	TRUE	73	156	224	224
SPAC27E2.09	SPAC27E2.09	5	5	5	>SPAC27E2.09 |mak2|phk1|histidine kinase Mak2|Schizosaccharomyces pombe|chr 1|||Manual	1	5	5	5	2.5	2.5	2.5	264.62	2310	2310	1.4902e-16	0.72222	0.85067	16.262	5	84781000	53761000	31020000				244	880;1896;2069;3099;3186	True;True;True;True;True	931;2025;2214;3373;3466	1454;3043;3286;5047;5048;5178	2081;4363;4364;4724;7201;7202;7203;7204;7384	2081;4363;4724;7202;7384
SPAC27E2.10c	SPAC27E2.10c	1	1	1	>SPAC27E2.10c |rfc3|SPAPJ698.01c|DNA replication factor C complex subunit Rfc3|Schizosaccharomyces pombe|chr 1|||Manual	1	1	1	1	3.8	3.8	3.8	38.439	342	342	1.5065e-16	NaN	NaN	NaN	0	0	0	0				245	1209	TRUE	1281	1972	2840	2840
SPAC27F1.06c	SPAC27F1.06c	2	2	2	>SPAC27F1.06c |||FKBP-type peptidyl-prolyl cis-trans isomerase |Schizosaccharomyces pombe|chr 1|||Manual	1	2	2	2	7.7	7.7	7.7	40.54	362	362	1.6339e-07	1.4128	1.7219	49.912	2	65027000	22761000	42266000				246	1036;3561	True;True	1096;3880	1702;5779	2443;8278;8279	2443;8278
SPAC27F1.09c	SPAC27F1.09c	1	1	1	>SPAC27F1.09c |prp10|sap155|U2 snRNP-associated protein Sap155|Schizosaccharomyces pombe|chr 1|||Manual	1	1	1	1	1.2	1.2	1.2	132.67	1166	1166	0.047432	NaN	NaN	NaN	0	0	0	0				247	2818	TRUE	3068	4639	6627	6627
SPAC29A4.02c	SPAC29A4.02c	5	5	5	>SPAC29A4.02c |||translation elongation factor EF-1 gamma subunit|Schizosaccharomyces pombe|chr 1|||Manual	1	5	5	5	21.8	21.8	21.8	45.701	409	409	1.3482e-47	0.8655	0.95346	1.8833	4	247050000	129700000	117350000				248	71;416;878;1695;2042	True;True;True;True;True	75;440;929;1816;2187	158;654;1452;2766;3250	227;949;2078;2079;3969;4672	227;949;2079;3969;4672
SPAC29A4.04c	SPAC29A4.04c	21	21	21	>SPAC29A4.04c |cbf5||pseudouridylate synthase Cbf5 |Schizosaccharomyces pombe|chr 1|||Manual	1	21	21	21	47.3	47.3	47.3	53.11	474	474	1.486e-208	1.0961	1.3553	34.266	26	2071100000	907070000	1164000000				249	365;473;634;1192;1480;1765;1778;1927;2227;2380;2381;2612;2628;2636;2939;3080;3118;3464;3465;3611;3746	True;True;True;True;True;True;True;True;True;True;True;True;True;True;True;True;True;True;True;True;True	383;500;672;1264;1576;1891;1905;2062;2063;2422;2592;2593;2850;2867;2875;2876;3197;3352;3395;3773;3774;3938;4081	567;739;1088;1941;2406;2407;2869;2889;3089;3090;3664;3922;3923;4326;4347;4358;4359;4817;5021;5084;5085;5646;5647;5648;5649;5884;6077	816;817;1080;1559;2798;3455;3456;4118;4144;4424;4425;5251;5252;5623;5624;5625;5626;5627;6194;6195;6224;6241;6242;6243;6887;6888;7165;7166;7167;7253;7254;7255;8087;8088;8089;8090;8091;8092;8093;8430;8710;8711	817;1080;1559;2798;3455;4118;4144;4424;5251;5623;5627;6194;6224;6242;6888;7166;7255;8088;8090;8430;8711	109;110;111;112	11;291;346;362
SPAC29A4.11	SPAC29A4.11	1	1	1	>SPAC29A4.11 |rga3||Rho-type GTPase activating protein Rga3|Schizosaccharomyces pombe|chr 1|||Manual	1	1	1	1	1.9	1.9	1.9	108.65	969	969	0.00018534	NaN	NaN	NaN	1	9947100	5949200	3997900				250	2970	TRUE	3230	4862	6941	6941
SPAC29A4.20	SPAC29A4.20	2	2	2	>SPAC29A4.20 |elp3|kat9|elongator complex, histone acetyltransferase subunit Elp3 |Schizosaccharomyces pombe|chr 1|||Manual	1	2	2	2	4.2	4.2	4.2	61.849	544	544	4.3961e-10	0.75788	0.92893	10.034	2	156650000	80238000	76412000				251	1293;2408	True;True	1374;2630	2109;4030	3036;5783	3036;5783
SPAC29B12.01	SPAC29B12.01	3	3	3	>SPAC29B12.01 |ino80|SPAC3G6.12|SNF2 family helicase Ino80|Schizosaccharomyces pombe|chr 1|||Manual	1	3	3	3	2.5	2.5	2.5	183.05	1604	1604	2.199e-10	1.4883	1.7053	23.951	3	37678000	17195000	20483000				252	1554;1683;2456	True;True;True	1662;1803;2682	2533;2746;4102	3641;3943;5888	3641;3943;5888
SPAC29B12.04	SPAC29B12.04	1	1	1	>SPAC29B12.04 |snz1||pyridoxine biosynthesis protein|Schizosaccharomyces pombe|chr 1|||Manual	1	1	1	1	5.4	5.4	5.4	31.403	296	296	0.017889	NaN	NaN	NaN	1	27961000	13801000	14160000				253	1291	TRUE	1372	2107	3034	3034
SPAC29B12.06c	SPAC29B12.06c	1	1	1	>SPAC29B12.06c |rcd1||RNA-binding protein, CCR4-NOT complex subunit Rcd1|Schizosaccharomyces pombe|chr 1|||Manual	1	1	1	1	4.2	4.2	4.2	32.211	283	283	0.011331	NaN	NaN	NaN	1	28651000	16590000	12061000				254	2050	TRUE	2195	3259	4686	4686
SPAC29B12.08	SPAC29B12.08	1	1	1	>SPAC29B12.08 |clr5||Clr5 protein|Schizosaccharomyces pombe|chr 1|||Manual	1	1	1	1	1.9	1.9	1.9	75.679	689	689	0.0002346	NaN	NaN	NaN	1	17519000	8403500	9115400				255	178	TRUE	188	298	423	423
SPAC2C4.16c;SPAC521.05	SPAC2C4.16c;SPAC521.05	1;1	1;1	1;1	>SPAC2C4.16c |rps801|rps8-1, rps8|40S ribosomal protein S8 |Schizosaccharomyces pombe|chr 1|||Manual;>SPAC521.05 |rps802|rps8-2|40S ribosomal protein S8 |Schizosaccharomyces pombe|chr 1|||Manual	2	1	1	1	13	13	13	22.593	200	200;200	3.736e-06	NaN	NaN	NaN	1	60256000	32781000	27475000				256	2650	TRUE	2890	4378	6270;6271	6271	113	121
SPAC2E1P3.04	SPAC2E1P3.04	1	1	1	>SPAC2E1P3.04 |cao1|spao1|copper amine oxidase Cao1|Schizosaccharomyces pombe|chr 1|||Manual	1	1	1	1	1.3	1.3	1.3	81.24	712	712	0.00017032	NaN	NaN	NaN	1	15739000	7246400	8492400				257	1157	TRUE	1229	1895	2734	2734
SPAC2E1P5.03	SPAC2E1P5.03	1	1	1	>SPAC2E1P5.03 |||DNAJ domain protein Erj5 |Schizosaccharomyces pombe|chr 1|||Manual	1	1	1	1	3	3	3	34.787	303	303	0.0030192	NaN	NaN	NaN	1	28360000	12613000	15747000				258	713	TRUE	756	1200	1727	1727
SPAC2F3.03c	SPAC2F3.03c	1	1	1	>SPAC2F3.03c |rpa49|rpa51|DNA-directed RNA polymerase I complex subunit Rpa49 |Schizosaccharomyces pombe|chr 1|||Manual	1	1	1	1	3.5	3.5	3.5	48.066	425	425	1.6774e-08	NaN	NaN	NaN	0	0	0	0				259	1642	TRUE	1756	2665	3835	3835
SPAC2F3.10	SPAC2F3.10	1	1	1	>SPAC2F3.10 |vps54||GARP complex subunit Vps54 |Schizosaccharomyces pombe|chr 1|||Manual	1	1	1	1	2.4	2.4	2.4	107.95	949	949	1.1355e-10	NaN	NaN	NaN	1	28270000	17234000	11036000				260	2868	TRUE	3119	4699	6701	6701
SPAC2F7.05c	SPAC2F7.05c	3	3	3	>SPAC2F7.05c |||translation initiation factor eIF5 |Schizosaccharomyces pombe|chr 1|||Manual	1	3	3	3	6.6	6.6	6.6	44.944	395	395	2.4491e-15	0.83693	1.0162	29.696	4	218370000	114850000	103520000				261	1925;1964;1965	True;True;True	2058;2059;2103;2104	3085;3086;3149;3150	4419;4420;4516;4517;4518;4519	4419;4516;4519	114	314
SPAC2F7.11	SPAC2F7.11	1	1	1	>SPAC2F7.11 |nrd1|msa2|RNA-binding protein Nrd1|Schizosaccharomyces pombe|chr 1|||Manual	1	1	1	1	2.8	2.8	2.8	57.76	529	529	4.2089e-06	NaN	NaN	NaN	0	0	0	0				262	2256	TRUE	2455	3729;3730	5338;5339	5338
SPAC2G11.02	SPAC2G11.02	2	2	2	>SPAC2G11.02 |urb2||ribosome biogenesis protein Urb2 |Schizosaccharomyces pombe|chr 1|||Manual	1	2	2	2	1.7	1.7	1.7	151.57	1318	1318	1.483e-05	0.8291	0.98174	22.917	2	32222000	16197000	16025000				263	819;1615	True;True	867;1728	1353;2622	1950;3767	1950;3767
SPAC2G11.11c	SPAC2G11.11c	4	4	4	>SPAC2G11.11c |prh1||ATP-dependent RNA helicase Prh1 |Schizosaccharomyces pombe|chr 1|||Manual	1	4	4	4	5.3	5.3	5.3	80.604	719	719	2.9555e-23	0.99368	1.1386	17.679	4	148510000	77949000	70561000				264	1187;2917;3204;3205	True;True;True;True	1259;3170;3485;3486	1935;4772;4773;5203;5204	2789;2790;6809;6810;7415;7416;7417;7418	2789;6810;7416;7418
SPAC30.01c	SPAC30.01c	2	2	2	>SPAC30.01c |sec72|sec7b|Sec7 domain protein, ARF GEF Sec72|Schizosaccharomyces pombe|chr 1|||Manual	1	2	2	2	1	1	1	206.8	1822	1822	9.15e-08	0.46808	0.55345	46.295	2	30872000	21455000	9417000				265	131;3189	True;True	137;3469	236;5181	335;7388	335;7388
SPAC30C2.04	SPAC30C2.04	2	2	2	>SPAC30C2.04 |||cofactor for methionyl-and glutamyl-tRNA synthetases |Schizosaccharomyces pombe|chr 1|||Manual	1	2	2	2	10.2	10.2	10.2	50.606	450	450	4.5604e-15	NaN	NaN	NaN	1	33007000	11097000	21910000				266	87;1484	True;True	91;1580	177;2413	256;3466	256;3466
SPAC30D11.03	SPAC30D11.03	1	1	1	>SPAC30D11.03 |ddx27|drs1|ATP-dependent RNA helicase Ddx27/Drs1 |Schizosaccharomyces pombe|chr 1|||Manual	1	1	1	1	1.5	1.5	1.5	85.452	754	754	0.00018453	NaN	NaN	NaN	1	23313000	12735000	10578000				267	3049	TRUE	3316	4969;4970	7091;7092	7092
SPAC30D11.12	SPAC30D11.12	7	7	5	>SPAC30D11.12 |rpl3802|rpl38-2, rps38|60S ribosomal protein L38 |Schizosaccharomyces pombe|chr 1|||Manual	1	7	7	5	68.9	68.9	52.7	8.3388	74	74	5.307e-67	0.69385	0.77591	19.469	9	746560000	436190000	310370000				268	1721;1992;2413;2524;2549;3795;3796	True;True;True;True;True;True;True	1843;2131;2635;2753;2781;4134;4135	2804;3185;4036;4196;4239;6154;6155;6156;6157	4028;4029;4574;5789;6014;6015;6068;8817;8818;8819;8820;8821;8822;8823;8824	4028;4574;5789;6015;6068;8817;8823
SPAC31A2.05c	SPAC31A2.05c	1	1	1	>SPAC31A2.05c |mis4||adherin, cohesin loading factor Mis4|Schizosaccharomyces pombe|chr 1|||Manual	1	1	1	1	0.6	0.6	0.6	180.72	1587	1587	0.005431	NaN	NaN	NaN	0	0	0	0				269	1775	TRUE	1902	2886	4141	4141
SPAC31A2.16	SPAC31A2.16	1	1	1	>SPAC31A2.16 |gef2||RhoGEF Gef2|Schizosaccharomyces pombe|chr 1|||Manual	1	1	1	1	1.4	1.4	1.4	126.54	1101	1101	0.034006	NaN	NaN	NaN	1	17549000	12637000	4912900				270	1100	TRUE	1165	1809	2608	2608
SPAC31G5.04	SPAC31G5.04	2	2	2	>SPAC31G5.04 |lys12||homoisocitrate dehydrogenase Lys12|Schizosaccharomyces pombe|chr 1|||Manual	1	2	2	2	8	8	8	39.256	362	362	1.8106e-18	NaN	NaN	NaN	1	34522000	20001000	14521000				271	1462;2739	True;True	1557;2986	2359;4511	3385;6451;6452	3385;6452
SPAC31G5.05c	SPAC31G5.05c	1	1	1	>SPAC31G5.05c |||ribulose phosphate 3-epimerase |Schizosaccharomyces pombe|chr 1|||Manual	1	1	1	1	6.6	6.6	6.6	25.205	228	228	0.0016523	NaN	NaN	NaN	0	0	0	0				272	1165	TRUE	1237	1903	2747	2747
SPAC323.04	SPAC323.04	1	1	1	>SPAC323.04 |||mitochondrial ATPase |Schizosaccharomyces pombe|chr 1|||Manual	1	1	1	1	2.7	2.7	2.7	54.841	487	487	1.7771e-08	NaN	NaN	NaN	0	0	0	0				273	3285	TRUE	3580	5356	7643	7643
SPAC328.03	SPAC328.03	3	3	3	>SPAC328.03 |tps1||alpha,alpha-trehalose-phosphate synthase [UDP-forming]|Schizosaccharomyces pombe|chr 1|||Manual	1	3	3	3	9.9	9.9	9.9	58.493	513	513	5.1343e-54	0.67936	0.82476	66.28	2	82227000	41506000	40722000				274	692;1221;3643	True;True;True	733;1295;3971	1164;1989;5926	1668;2860;8485;8486	1668;2860;8486
SPAC328.10c;SPAC8C9.08	SPAC328.10c;SPAC8C9.08	5;5	5;5	5;5	>SPAC328.10c |rps502|rps5-2|40S ribosomal protein S5 |Schizosaccharomyces pombe|chr 1|||Manual;>SPAC8C9.08 |rps5||40S ribosomal protein S5 |Schizosaccharomyces pombe|chr 1|||Manual	2	5	5	5	31.5	31.5	31.5	22.357	203	203;203	1.991e-49	0.81	0.86665	12.629	7	849950000	455800000	394150000				275	1728;1729;2633;2792;3549	True;True;True;True;True	1851;1852;2872;3042;3867	2816;2817;4352;4353;4575;4576;5764	4050;4051;6229;6230;6231;6538;6539;6540;8258;8259	4050;4051;6230;6540;8258
SPAC32A11.04c	SPAC32A11.04c	1	1	1	>SPAC32A11.04c |tif212|tif22, SPAC6B12.17c|translation initiation factor eIF2 beta subunit |Schizosaccharomyces pombe|chr 1|||Manual	1	1	1	1	7.8	7.8	7.8	35.96	321	321	5.4161e-18	NaN	NaN	NaN	0	0	0	0				276	2641	TRUE	2881	4366	6252	6252
SPAC343.05	SPAC343.05	5	5	5	>SPAC343.05 |vma1||V-type ATPase V1 domain, subunit A|Schizosaccharomyces pombe|chr 1|||Manual	1	5	5	5	15.7	15.7	15.7	68.805	619	619	5.9629e-51	0.80267	0.92768	33.533	7	458540000	234740000	223800000				277	519;1122;1218;2452;3764	True;True;True;True;True	548;1193;1194;1292;2678;4101	899;1850;1851;1984;4095;4096;6105	1297;2673;2674;2675;2853;2854;5876;5877;5878;5879;5880;8745	1297;2674;2853;5880;8745	115	213
SPAC343.16	SPAC343.16	1	1	1	>SPAC343.16 |lys2||homoaconitate hydratase Lys2|Schizosaccharomyces pombe|chr 1|||Manual	1	1	1	1	2.2	2.2	2.2	78.024	721	721	1.4143e-21	NaN	NaN	NaN	0	0	0	0				278	907	TRUE	962	1507	2163	2163
SPAC3A11.07	SPAC3A11.07	5	5	5	>SPAC3A11.07 |||NADH dehydrogenase |Schizosaccharomyces pombe|chr 1|||Manual	1	5	5	5	13.8	13.8	13.8	61.674	551	551	1.8532e-55	0.72637	0.87313	16.457	5	343800000	185500000	158300000				279	130;1304;2399;3034;3137	True;True;True;True;True	136;1387;2617;3299;3415	235;2146;4002;4948;5114;5115	333;334;3081;5725;5726;7065;7292;7293;7294;7295;7296	334;3081;5726;7065;7295
SPAC3A11.12c	SPAC3A11.12c	6	6	6	>SPAC3A11.12c |rpt5|pam2, tbp1|19S proteasome regulatory subunit Rpt5 |Schizosaccharomyces pombe|chr 1|||Manual	1	6	6	6	19.9	19.9	19.9	48.835	438	438	3.4384e-45	0.77143	0.97193	27.332	8	553260000	295260000	258010000				280	479;555;1637;2920;3227;3438	True;True;True;True;True;True	506;586;1751;3173;3513;3514;3743	746;960;2658;4779;4780;4781;5255;5256;5587;5588	1091;1382;1383;3827;6822;6823;6824;6825;7494;7495;8005;8006;8007	1091;1383;3827;6824;7494;8005	116	309
SPAC3A12.07	SPAC3A12.07	1	1	1	>SPAC3A12.07 |rpb11||RNA polymerase II complex subunit Rpb11|Schizosaccharomyces pombe|chr 1|||Manual	1	1	1	1	13.8	13.8	13.8	14.127	123	123	0.00032804	NaN	NaN	NaN	0	0	0	0				281	2171	TRUE	2350	3559	5108	5108	117	1
SPAC3A12.18	SPAC3A12.18	7	7	7	>SPAC3A12.18 |zwf1|SPAC9.01|glucose-6-phosphate 1-dehydrogenase |Schizosaccharomyces pombe|chr 1|||Manual	1	7	7	7	20	20	20	57.204	500	500	2.1852e-65	0.93034	0.97893	29.269	7	382760000	193630000	189120000				282	1;376;1175;1743;1766;3106;3107	True;True;True;True;True;True;True	1;395;1247;1868;1892;3380;3381	1;579;1918;2839;2840;2870;5058;5059	1;2;837;2770;4079;4080;4081;4119;4120;7215;7216;7217;7218	1;837;2770;4081;4120;7216;7218
SPAC3C7.01c	SPAC3C7.01c	1	1	1	>SPAC3C7.01c ||SPAC732.03c|inositol polyphosphate phosphatase |Schizosaccharomyces pombe|chr 1|||Manual	1	1	1	1	1.3	1.3	1.3	70.859	611	611	0.023802	NaN	NaN	NaN	1	22450000	10213000	12238000				283	640	TRUE	678	1095	1571	1571
SPAC3C7.08c	SPAC3C7.08c	2	2	2	>SPAC3C7.08c |elf1||AAA family ATPase Elf1|Schizosaccharomyces pombe|chr 1|||Manual	1	2	2	2	2.8	2.8	2.8	116.7	1057	1057	2.3614e-11	0.81116	0.99281	17.082	3	103140000	53596000	49548000				284	1877;3432	True;True	2006;3737	3018;5579;5580	4329;7992;7993;7994;7995;7996;7997	4329;7993
SPAC3F10.11c	SPAC3F10.11c	2	2	2	>SPAC3F10.11c |abc2||glutathione S-conjugate-exporting ATPase Abc2|Schizosaccharomyces pombe|chr 1|||Manual	1	2	2	2	1.9	1.9	1.9	166.94	1478	1478	1.5306e-07	0.42641	0.53457	72.472	2	46587000	26525000	20063000				285	2986;3666	True;True	3247;3996	4882;4883;5957	6972;6973;8532;8533	6972;8532
SPAC3G6.04	SPAC3G6.04	1	1	1	>SPAC3G6.04 |rnp24||RNA-binding protein Rnp24|Schizosaccharomyces pombe|chr 1|||Manual	1	1	1	1	4.3	4.3	4.3	42.073	369	369	3.6693e-08	NaN	NaN	NaN	1	28028000	11759000	16269000				286	2929	TRUE	3184	4801	6862;6863	6862
SPAC3G9.03;SPCC1322.11	SPAC3G9.03;SPCC1322.11	6;6	6;6	6;6	>SPAC3G9.03 |rpl2301|rpl23-1|60S ribosomal protein L23|Schizosaccharomyces pombe|chr 1|||Manual;>SPCC1322.11 |rpl2302|rpl23-2|60S ribosomal protein L23|Schizosaccharomyces pombe|chr 3|||Manual	2	6	6	6	43.9	43.9	43.9	14.882	139	139;139	1.0875e-81	0.68785	0.8442	15.515	19	2974200000	1610400000	1363900000				287	1351;1541;1943;1944;2194;2323	True;True;True;True;True;True	1442;1443;1646;1647;2079;2080;2081;2082;2383;2384;2523	2208;2209;2508;2509;3116;3117;3118;3119;3120;3121;3122;3606;3607;3608;3609;3610;3611;3612;3613;3813;3814;3815	3167;3168;3169;3605;3606;4467;4468;4469;4470;4471;4472;4473;4474;4475;4476;4477;4478;4479;4480;5165;5166;5167;5168;5169;5170;5171;5172;5173;5453;5454;5455;5456;5457	3169;3606;4469;4478;5169;5453	118;119;120;121	15;25;59;76
SPAC3G9.06	SPAC3G9.06	1	1	1	>SPAC3G9.06 |frs2||cytoplasmic phenylalanine-tRNA ligase alpha subunit Frs2 |Schizosaccharomyces pombe|chr 1|||Manual	1	1	1	1	3	3	3	56.266	499	499	0.032174	NaN	NaN	NaN	1	45972000	31252000	14720000				288	369	TRUE	387	571	823	823
SPAC3G9.08	SPAC3G9.08	1	1	1	>SPAC3G9.08 |png1||ING family homolog Png1|Schizosaccharomyces pombe|chr 1|||Manual	1	1	1	1	8.5	8.5	8.5	31.275	283	283	0.0040016	NaN	NaN	NaN	1	22891000	12154000	10737000				289	2743	TRUE	2990	4516	6461	6461
SPAC3G9.09c	SPAC3G9.09c	2	2	2	>SPAC3G9.09c |tif211|eIF2alpha|translation initiation factor eIF2 alpha subunit|Schizosaccharomyces pombe|chr 1|||Manual	1	2	2	2	6.9	6.9	6.9	34.525	306	306	1.4548e-33	0.74804	0.71029	19.062	2	241040000	133710000	107330000				290	2058;2059	True;True	2203;2204	3269;3270	4699;4700;4701	4699;4701
SPAC3H1.02c	SPAC3H1.02c	1	1	1	>SPAC3H1.02c |||metallopeptidase |Schizosaccharomyces pombe|chr 1|||Manual	1	1	1	1	2	2	2	117.42	1036	1036	0.10517	NaN	NaN	NaN	0	26632000	26632000	0	+			291	2179	TRUE	2361	3576	5129	5129	122;123	744;748
SPAC3H1.07	SPAC3H1.07	2	2	2	>SPAC3H1.07 |aru1|car3|arginase Aru1|Schizosaccharomyces pombe|chr 1|||Manual	1	2	2	2	9.9	9.9	9.9	35.703	323	323	3.9001e-16	0.60225	0.73373	68.697	3	375130000	230310000	144830000				292	108;2255	True;True	112;2454	205;206;3728	292;293;294;5337	292;5337
SPAC3H5.05c;SPBC18H10.13	SPAC3H5.05c;SPBC18H10.13	6;6	6;6	6;6	>SPAC3H5.05c |rps1401|rps14-1, rps14|40S ribosomal protein S14 |Schizosaccharomyces pombe|chr 1|||Manual;>SPBC18H10.13 |rps1402|rps14-2|40S ribosomal protein S14 |Schizosaccharomyces pombe|chr 2|||Manual	2	6	6	6	59	59	59	14.699	139	139;139	7.2448e-16	0.6774	0.77968	35.582	6	177710000	89993000	87721000				293	302;367;1233;1234;2724;3243	True;True;True;True;True;True	317;385;1309;1310;2970;3534	475;569;2012;2013;2014;4490;5285	682;820;821;2895;2896;2897;2898;2899;6428;7533	682;821;2895;2898;6428;7533
SPAC3H5.07	SPAC3H5.07	6	6	6	>SPAC3H5.07 |rpl702|rpl7-2, rpl7, rpl7b|60S ribosomal protein L7|Schizosaccharomyces pombe|chr 1|||Manual	1	6	6	6	35.2	35.2	35.2	28.449	250	250	1.569e-77	0.75948	0.7211	26.815	7	710420000	407380000	303030000				294	141;1371;2416;3361;3362;3818	True;True;True;True;True;True	147;1463;2638;3663;3664;4159	246;247;2235;2236;4042;5477;5478;6193	346;347;348;349;3205;3206;3207;5802;5803;7840;7841;7842;8880	349;3206;5803;7840;7842;8880
SPAC3H5.12c;SPBC11C11.09c	SPAC3H5.12c;SPBC11C11.09c	2;2	2;2	2;2	>SPAC3H5.12c |rpl501|rpl5-1, rpl5|60S ribosomal protein L5 |Schizosaccharomyces pombe|chr 1|||Manual;>SPBC11C11.09c |rpl502|rpl5-2, rpl5b|60S ribosomal protein L5|Schizosaccharomyces pombe|chr 2|||Manual	2	2	2	2	17.3	17.3	17.3	33.459	294	294;294	3.4976e-26	0.64902	0.89551	19.047	3	152890000	86817000	66076000				295	842;3690	True;True	891;4022	1383;1384;5999	1987;1988;1989;1990;8592	1990;8592
SPAC458.02c	SPAC458.02c	1	1	1	>SPAC458.02c |||mRNP complex |Schizosaccharomyces pombe|chr 1|||Manual	1	1	1	1	4.7	4.7	4.7	53.735	468	468	0.01077	NaN	NaN	NaN	1	51654000	19538000	32116000				296	1555	TRUE	1663	2534	3642	3642
SPAC458.03	SPAC458.03	2	2	2	>SPAC458.03 |tel2||Tel2/Rad-5/Clk-2 family protein Tel2|Schizosaccharomyces pombe|chr 1|||Manual	1	2	2	2	2.8	2.8	2.8	99.049	868	868	2.0512e-17	NaN	NaN	NaN	1	12763000	4998800	7764400				297	72;1717	True;True	76;1839	159;160;2799	228;229;4018	228;4018
SPAC4A8.05c	SPAC4A8.05c	6	6	6	>SPAC4A8.05c |myp2|myo3|myosin II heavy chain Myo3|Schizosaccharomyces pombe|chr 1|||Manual	1	6	6	6	3.9	3.9	3.9	242.57	2104	2104	3.4552e-32	0.58332	0.71014	16.714	5	162560000	98207000	64354000				298	340;763;2215;2402;2494;3259	True;True;True;True;True;True	358;808;2409;2620;2722;3550	537;1276;3646;4005;4155;5312	775;1829;1830;5224;5730;5955;7578;7579;7580	775;1830;5224;5730;5955;7578
SPAC4A8.07c	SPAC4A8.07c	1	1	1	>SPAC4A8.07c |||sphingoid long chain base kinase |Schizosaccharomyces pombe|chr 1|||Manual	1	1	1	1	1.7	1.7	1.7	51.288	458	458	0.00067805	NaN	NaN	NaN	0	0	0	0				299	344	TRUE	362	542	780	780
SPAC4A8.11c	SPAC4A8.11c	25	25	25	>SPAC4A8.11c |fas2|lsd1|fatty acid synthase alpha subunit Lsd1|Schizosaccharomyces pombe|chr 1|||Manual	1	25	25	25	24.5	24.5	24.5	202.17	1842	1842	0	0.73645	0.83434	22.136	32	2533700000	1430300000	1103400000				300	114;306;514;808;834;866;956;1253;1350;1659;1660;1753;1825;2128;2205;2343;2498;2877;3031;3082;3111;3244;3250;3389;3692	True;True;True;True;True;True;True;True;True;True;True;True;True;True;True;True;True;True;True;True;True;True;True;True;True	118;323;543;854;883;915;1012;1331;1440;1441;1774;1775;1879;1953;2285;2398;2550;2551;2726;3128;3296;3354;3385;3386;3535;3541;3692;4024	213;489;875;876;1336;1337;1372;1373;1435;1574;2046;2047;2206;2207;2686;2687;2854;2955;2956;3443;3631;3858;3859;3860;4159;4160;4708;4945;5024;5063;5064;5065;5066;5286;5287;5298;5299;5516;6001	302;707;1263;1264;1927;1928;1974;1975;1976;2057;2058;2259;2940;2941;2942;2943;3165;3166;3863;3864;3865;3866;3867;4099;4100;4248;4249;4250;4937;5202;5518;5519;5520;5960;5961;5962;5963;6712;6713;7061;7062;7171;7223;7224;7225;7226;7534;7535;7536;7537;7538;7555;7556;7899;7900;8595	302;707;1264;1928;1975;2057;2259;2942;3166;3865;3867;4099;4248;4937;5202;5520;5960;6713;7062;7171;7225;7535;7556;7900;8595	124	333
SPAC4A8.16c	SPAC4A8.16c	2	2	2	>SPAC4A8.16c |tif33|SPAC823.01c|translation initiation factor eIF3c|Schizosaccharomyces pombe|chr 1|||Manual	1	2	2	2	5.1	5.1	5.1	104.37	918	918	5.3284e-44	0.59672	0.67108	25.58	2	127660000	75771000	51891000				301	915;2351	True;True	970;2559	1521;3869	2184;5533;5534	2184;5533
SPAC4D7.01c	SPAC4D7.01c	1	1	1	>SPAC4D7.01c |sec71|sec7a, SPAP8A3.15c|Sec7 domain protein, ARF GEF |Schizosaccharomyces pombe|chr 1|||Manual	1	1	1	1	0.5	0.5	0.5	206.93	1811	1811	9.9513e-05	NaN	NaN	NaN	1	17095000	11469000	5625600				302	1464	TRUE	1559	2361	3389	3389
SPAC4D7.05	SPAC4D7.05	5	5	5	>SPAC4D7.05 |sum1|tif34|translation initiation factor eIF3i|Schizosaccharomyces pombe|chr 1|||Manual	1	5	5	5	22.9	22.9	22.9	36.811	328	328	1.3911e-32	0.65951	0.83175	36.15	5	189240000	121660000	67577000				303	830;879;2180;2499;2625	True;True;True;True;True	879;930;2362;2727;2863	1367;1453;3577;4161;4341	1968;2080;5130;5964;6215	1968;2080;5130;5964;6215
SPAC4D7.09	SPAC4D7.09	1	1	1	>SPAC4D7.09 |tif223||translation initiation factor eIF2B gamma subunit |Schizosaccharomyces pombe|chr 1|||Manual	1	1	1	1	3.5	3.5	3.5	50.461	458	458	3.2386e-09	NaN	NaN	NaN	0	0	0	0				304	3614	TRUE	3941	5887	8436	8436
SPAC4D7.10c	SPAC4D7.10c	5	5	5	>SPAC4D7.10c |spt20||SAGA complex subunit Spt20|Schizosaccharomyces pombe|chr 1|||Manual	1	5	5	5	18.8	18.8	18.8	54.028	473	473	6.6221e-106	1.9437	2.3855	15.807	9	1171300000	360390000	810880000				305	697;1395;1764;2420;2807	True;True;True;True;True	740;1487;1890;2642;3057	1177;1178;1179;2269;2270;2867;2868;4048;4049;4602	1690;1691;1692;1693;1694;1695;3253;3254;4116;4117;5812;5813;5814;6577	1694;3253;4116;5812;6577
SPAC4F10.09c	SPAC4F10.09c	4	4	4	>SPAC4F10.09c |||ribosome biogenesis protein Noc1 |Schizosaccharomyces pombe|chr 1|||Manual	1	4	4	4	6.2	6.2	6.2	97.992	860	860	1.4442e-08	1.2732	1.4597	32.598	4	114530000	56219000	58313000				306	1401;1589;2526;2936	True;True;True;True	1493;1700;2755;3194	2278;2585;2586;4198;4814	3265;3711;3712;6017;6884	3265;3711;6017;6884
SPAC4F10.10c	SPAC4F10.10c	2	2	2	>SPAC4F10.10c |mnn9||mannosyltransferase complex subunit, Anp family Mnn9 |Schizosaccharomyces pombe|chr 1|||Manual	1	2	2	2	9.5	9.5	9.5	38.296	337	337	8.0756e-05	0.78151	0.92446	49.192	2	43692000	24545000	19147000				307	2300;2595	True;True	2499;2832	3786;4303	5418;6165	5418;6165
SPAC4F8.06	SPAC4F8.06	2	2	2	>SPAC4F8.06 |||mitochondrial ribosomal protein subunit S12 |Schizosaccharomyces pombe|chr 1|||Manual	1	2	2	2	21.6	21.6	21.6	17.867	162	162	2.3132e-07	0.88178	1.0766	17.278	2	54110000	30275000	23835000				308	255;3033	True;True	270;3298	405;4947	575;7064	575;7064
SPAC4F8.07c	SPAC4F8.07c	7	7	7	>SPAC4F8.07c |hxk2||hexokinase 2|Schizosaccharomyces pombe|chr 1|||Manual	1	7	7	7	25.7	25.7	25.7	50.92	455	455	1.3037e-55	0.77901	0.93015	23.789	9	506220000	243430000	262790000				309	419;516;780;2182;2312;3374;3420	True;True;True;True;True;True;True	443;545;826;2365;2366;2512;3676;3724;3725	659;878;1301;3580;3581;3800;5495;5496;5560;5561	956;1266;1267;1870;1871;5133;5134;5135;5438;7866;7867;7868;7964;7965	956;1266;1870;5135;5438;7867;7964	125;126	289;374
SPAC4F8.11	SPAC4F8.11	1	1	1	>SPAC4F8.11 |||WD repeat protein, human WDR24 family|Schizosaccharomyces pombe|chr 1|||Manual	1	1	1	1	1.8	1.8	1.8	93.227	846	846	0.024591	NaN	NaN	NaN	0	0	0	0				310	2843	TRUE	3093	4669	6665	6665
SPAC4F8.12c	SPAC4F8.12c	1	1	1	>SPAC4F8.12c |spp42|cwf6|U5 snRNP complex subunit Spp42|Schizosaccharomyces pombe|chr 1|||Manual	1	1	1	1	0.3	0.3	0.3	274.55	2363	2363	0.00021564	NaN	NaN	NaN	1	7192600	4953900	2238600				311	1414	TRUE	1506	2296	3290	3290
SPAC4G8.02c	SPAC4G8.02c	1	1	1	>SPAC4G8.02c |sss1||translocon gamma subunit Sss1 |Schizosaccharomyces pombe|chr 1|||Manual	1	1	1	1	17.1	17.1	17.1	7.7912	70	70	0.0033042	0.82618	1.0597	3.398	2	8710800	4251800	4459100				312	2235	TRUE	2431	3695;3696	5291;5292	5292
SPAC4G9.08c	SPAC4G9.08c	3	3	3	>SPAC4G9.08c |rpc2||DNA-directed RNA polymerase III complex subunit Rpc2|Schizosaccharomyces pombe|chr 1|||Manual	1	3	3	3	3.2	3.2	3.2	130.24	1165	1165	1.0209e-08	0.77246	0.91252	22.454	2	24092000	13882000	10210000				313	1110;1419;3689	True;True;True	1181;1511;4021	1835;2301;5998	2653;3298;8591	2653;3298;8591
SPAC4G9.09c	SPAC4G9.09c	10	10	10	>SPAC4G9.09c |arg11||N-acetyl-gamma-glutamyl-phosphate reductase/acetylglutamate kinase|Schizosaccharomyces pombe|chr 1|||Manual	1	10	10	10	20.5	20.5	20.5	97.704	885	885	1.838e-148	1.2921	1.4133	20.47	12	1237600000	501910000	735710000				314	35;321;451;864;1276;1425;2222;2293;2299;3418	True;True;True;True;True;True;True;True;True;True	36;338;476;913;1356;1518;2417;2492;2498;3722	63;511;704;705;1432;1433;2085;2311;3658;3776;3784;3785;5558	95;737;738;1023;1024;2052;2053;2054;2055;3007;3008;3312;5242;5402;5403;5404;5414;5415;5416;5417;7961;7962	95;738;1023;2055;3008;3312;5242;5403;5417;7961
SPAC4G9.15	SPAC4G9.15	1	1	1	>SPAC4G9.15 |||ketoreductase |Schizosaccharomyces pombe|chr 1|||Manual	1	1	1	1	4.7	4.7	4.7	37.307	341	341	0.00026882	NaN	NaN	NaN	1	25241000	10912000	14329000				315	78	TRUE	82	167	240	240
SPAC4G9.16c	SPAC4G9.16c	2	1	1	>SPAC4G9.16c |rpl901|rpl9-1|60S ribosomal protein L9|Schizosaccharomyces pombe|chr 1|||Manual	1	2	1	1	21.1	9.5	9.5	21.513	190	190	1.6442e-36	0.81802	1.0043	4.2421	2	343000000	179430000	163570000				316	2090;3036	False;True	2236;3301	3322;4950;4951	4771;7067;7068	4771;7067
SPAC4G9.20c	SPAC4G9.20c	1	1	1	>SPAC4G9.20c |||mitochondrial carrier with solute carrier repeats |Schizosaccharomyces pombe|chr 1|||Manual	1	1	1	1	6.7	6.7	6.7	32.743	298	298	1.6705e-20	NaN	NaN	NaN	0	0	0	0				317	19	TRUE	20	41	59	59
SPAC4H3.10c	SPAC4H3.10c	22	22	22	>SPAC4H3.10c |pyk1||pyruvate kinase |Schizosaccharomyces pombe|chr 1|||Manual	1	22	22	22	65.6	65.6	65.6	55.514	509	509	0	0.81504	0.92257	20.669	31	4908100000	2448200000	2459900000				318	52;65;167;271;374;846;998;1034;1035;1274;1505;1506;1522;2170;2243;2244;2555;2556;2615;3119;3344;3813	True;True;True;True;True;True;True;True;True;True;True;True;True;True;True;True;True;True;True;True;True;True	55;68;69;176;286;393;895;1057;1094;1095;1354;1603;1604;1622;2349;2439;2440;2441;2787;2788;2853;3396;3642;3643;4153;4154	88;150;151;152;283;427;428;429;577;1390;1391;1647;1648;1649;1650;1699;1700;1701;2082;2441;2442;2443;2474;3558;3705;3706;3707;3708;4245;4246;4247;4329;5086;5452;5453;6185;6186;6187;6188	128;215;216;217;218;219;403;608;609;610;611;612;834;1999;2000;2001;2355;2356;2357;2358;2359;2360;2438;2439;2440;2441;2442;3000;3001;3002;3507;3508;3509;3510;3511;3556;3557;5107;5303;5304;5305;5306;5307;5308;5309;5310;6074;6075;6076;6077;6078;6199;6200;6201;7256;7257;7258;7796;7797;7798;8869;8870;8871;8872;8873;8874	128;218;403;609;834;2001;2356;2438;2442;3002;3507;3509;3557;5107;5307;5310;6074;6077;6199;7257;7797;8873	127;128;129;130	216;337;375;430
SPAC4H3.14c	SPAC4H3.14c	2	2	2	>SPAC4H3.14c |||sequence orphan|Schizosaccharomyces pombe|chr 1|||Manual	1	2	2	2	12.8	12.8	12.8	39.799	345	345	9.8865e-09	0.65384	0.86983	35.049	2	42834000	27025000	15810000				319	1582;2461	True;True	1693;2687	2577;4109	3696;5897	3696;5897
SPAC513.01c;SPCP31B10.07	SPAC513.01c;SPCP31B10.07	26;26	26;26	26;26	>SPAC513.01c |eft201|eft2-1, etf2, SPAPYUK71.04c|translation elongation factor 2 |Schizosaccharomyces pombe|chr 1|||Manual;>SPCP31B10.07 |eft202||translation elongation factor 2 |Schizosaccharomyces pombe|chr 3|||Manual	2	26	26	26	45.1	45.1	45.1	93.23	842	842;842	0	0.77977	0.87618	26.435	43	5182500000	2736600000	2446000000				320	79;310;346;743;764;794;795;885;937;1005;1201;1211;1344;1345;1380;1394;1420;1483;1520;1547;2092;2329;2330;2431;2985;3345	True;True;True;True;True;True;True;True;True;True;True;True;True;True;True;True;True;True;True;True;True;True;True;True;True;True	83;327;364;788;809;840;841;936;992;1064;1273;1283;1284;1285;1433;1434;1472;1486;1512;1513;1579;1619;1620;1655;2238;2533;2534;2535;2654;3246;3644;3645	168;495;496;544;545;1244;1245;1277;1278;1319;1320;1321;1469;1550;1551;1658;1659;1961;1962;1974;1975;1976;1977;2198;2199;2200;2247;2248;2268;2302;2303;2411;2412;2470;2471;2472;2525;2526;3324;3835;3836;3837;3838;3839;4061;4881;5454;5455;5456;5457	241;242;243;244;718;719;720;782;783;784;1782;1783;1784;1831;1832;1833;1902;1903;1904;1905;1906;2103;2226;2227;2228;2376;2377;2378;2825;2826;2827;2828;2829;2842;2843;2844;2845;3155;3156;3157;3158;3222;3223;3251;3252;3299;3300;3301;3302;3462;3463;3464;3465;3550;3551;3552;3553;3554;3631;3632;4774;5485;5486;5487;5488;5489;5490;5491;5492;5493;5494;5829;6970;6971;7799;7800;7801;7802;7803;7804;7805;7806	241;719;783;1783;1831;1903;1904;2103;2226;2377;2827;2844;3156;3157;3223;3252;3302;3463;3554;3631;4774;5485;5494;5829;6971;7805	131;132;133;134;135;136;137;138;139	13;22;275;335;337;573;588;593;804
SPAC56E4.03	SPAC56E4.03	1	1	1	>SPAC56E4.03 |||aromatic aminotransferase |Schizosaccharomyces pombe|chr 1|||Manual	1	1	1	1	2.5	2.5	2.5	53.166	474	474	0.015667	NaN	NaN	NaN	1	11899000	4137400	7762100				321	1139	TRUE	1211	1869	2702	2702
SPAC56E4.04c	SPAC56E4.04c	37	37	37	>SPAC56E4.04c |cut6||acetyl-CoA/biotin carboxylase|Schizosaccharomyces pombe|chr 1|||Manual	1	37	37	37	24.2	24.2	24.2	256.84	2280	2280	0	0.76204	0.92979	20.786	46	3457400000	1843600000	1613800000				322	330;347;644;758;788;807;939;958;989;1073;1250;1255;1271;1367;1421;1441;1467;1546;1733;1856;1928;1939;1940;1980;2015;2146;2342;2395;2601;2666;2694;2695;2768;2837;2899;3066;3769	True;True;True;True;True;True;True;True;True;True;True;True;True;True;True;True;True;True;True;True;True;True;True;True;True;True;True;True;True;True;True;True;True;True;True;True;True	347;365;683;803;834;853;994;1014;1047;1135;1328;1333;1334;1350;1459;1514;1536;1562;1654;1857;1985;2064;2075;2076;2119;2157;2312;2548;2549;2613;2839;2907;2938;2939;3017;3087;3150;3334;4107	524;546;1101;1102;1270;1310;1311;1335;1553;1576;1632;1757;1758;2042;2049;2050;2073;2074;2075;2230;2231;2304;2305;2306;2334;2364;2365;2524;2823;2995;3091;3106;3107;3170;3171;3213;3483;3855;3856;3857;3997;4310;4402;4448;4449;4450;4545;4662;4740;4997;4998;6111	757;758;785;1580;1581;1582;1583;1821;1885;1886;1887;1888;1926;2230;2262;2263;2336;2523;2524;2525;2935;2945;2946;2947;2948;2988;2989;2990;2991;2992;2993;3197;3198;3199;3303;3304;3305;3306;3345;3346;3394;3395;3396;3397;3630;4059;4302;4303;4426;4448;4449;4450;4451;4548;4549;4550;4551;4612;4613;4991;5514;5515;5516;5517;5717;6172;6304;6370;6371;6372;6501;6502;6655;6656;6762;6763;7135;7136;7137;8752	758;785;1583;1821;1885;1926;2230;2263;2336;2524;2935;2945;2989;3197;3305;3346;3394;3630;4059;4302;4426;4448;4450;4548;4613;4991;5517;5717;6172;6304;6370;6372;6502;6656;6762;7137;8752	140;141	355;999
SPAC56F8.03	SPAC56F8.03	6	6	6	>SPAC56F8.03 |||translation initiation factor IF2 |Schizosaccharomyces pombe|chr 1|||Manual	1	6	6	6	6.5	6.5	6.5	119.93	1079	1079	2.9024e-21	0.55491	0.69791	21.079	6	77210000	46434000	30775000				323	1362;1649;1841;2550;3241;3359	True;True;True;True;True;True	1454;1764;1969;2782;3532;3661	2224;2675;2978;4240;5283;5475	3191;3849;4281;6069;7531;7835	3191;3849;4281;6069;7531;7835
SPAC57A10.12c	SPAC57A10.12c	4	4	4	>SPAC57A10.12c |ura3||dihydroorotate dehydrogenase Ura3|Schizosaccharomyces pombe|chr 1|||Manual	1	4	4	4	16.3	16.3	16.3	48.295	443	443	7.7124e-36	0.9268	1.0153	17.821	6	243970000	136280000	107680000				324	1163;2655;2842;2995	True;True;True;True	1235;2895;3092;3257	1901;4386;4387;4667;4668;4894	2743;2744;2745;6280;6281;6282;6283;6663;6664;6985;6986	2743;6282;6663;6986
SPAC57A7.04c	SPAC57A7.04c	1	1	1	>SPAC57A7.04c |pabp||mRNA export shuttling protein|Schizosaccharomyces pombe|chr 1|||Manual	1	1	1	1	3.1	3.1	3.1	71.512	653	653	0.00016973	NaN	NaN	NaN	0	0	0	0				325	3539	TRUE	3856	5751	8240	8240
SPAC57A7.08	SPAC57A7.08	1	1	1	>SPAC57A7.08 |pzh1||serine/threonine protein phosphatase Pzh1|Schizosaccharomyces pombe|chr 1|||Manual	1	1	1	1	2.1	2.1	2.1	57.131	515	515	0.00027677	NaN	NaN	NaN	1	27682000	13652000	14030000				326	1399	TRUE	1491	2276	3263	3263
SPAC57A7.10c	SPAC57A7.10c	7	7	7	>SPAC57A7.10c |sec21||coatomer gamma subunit Sec21 |Schizosaccharomyces pombe|chr 1|||Manual	1	7	7	7	12.4	12.4	12.4	100.93	905	905	2.6351e-104	0.7329	0.83895	24.166	6	591040000	323610000	267440000				327	1334;1335;1588;2432;2464;2752;2964	True;True;True;True;True;True;True	1421;1422;1699;2655;2691;3001;3224	2185;2186;2584;4062;4113;4528;4853	3136;3137;3138;3709;3710;5830;5902;6478;6479;6928;6929	3136;3138;3709;5830;5902;6478;6928
SPAC57A7.11	SPAC57A7.11	1	1	1	>SPAC57A7.11 |mip1||WD repeat protein, Raptor homolog Mip1|Schizosaccharomyces pombe|chr 1|||Manual	1	1	1	1	1.4	1.4	1.4	148.53	1313	1313	0.00078005	NaN	NaN	NaN	1	15248000	9774900	5473400				328	1580	TRUE	1691	2575	3694	3694
SPAC589.12	SPAC589.12	1	1	1	>SPAC589.12 ||SPAC688.01|glycosylceramide biosynthesis protein |Schizosaccharomyces pombe|chr 1|||Manual	1	1	1	1	1.1	1.1	1.1	110.03	971	971	0.001203	NaN	NaN	NaN	0	0	0	0				329	3333	TRUE	3631	5437	7773	7773
SPAC5H10.06c	SPAC5H10.06c	4	4	4	>SPAC5H10.06c |adh4||alcohol dehydrogenase Adh4|Schizosaccharomyces pombe|chr 1|||Manual	1	4	4	4	14.7	14.7	14.7	45.527	422	422	4.6998e-98	0.1434	0.17611	90.755	3	545500000	508380000	37120000				330	1147;1741;1742;2957	True;True;True;True	1219;1866;1867;3215;3216	1880;2833;2834;2835;2836;2837;2838;4841;4842	2716;4073;4074;4075;4076;4077;4078;6914;6915	2716;4073;4077;6915	142	189
SPAC5H10.10	SPAC5H10.10	3	3	3	>SPAC5H10.10 |||NADPH dehydrogenase |Schizosaccharomyces pombe|chr 1|||Manual	1	3	3	3	10.7	10.7	10.7	44.983	392	392	1.3863e-15	0.72181	0.88335	12.966	2	103740000	54753000	48988000				331	766;2955;3730	True;True;True	811;3213;4065	1280;4839;6055	1836;6911;8677	1836;6911;8677
SPAC607.03c	SPAC607.03c	4	4	4	>SPAC607.03c |snu13||U3 snoRNP-associated protein Snu13|Schizosaccharomyces pombe|chr 1|||Manual	1	4	4	4	51.2	51.2	51.2	13.535	125	125	1.4437e-72	1.2665	1.5409	23.767	4	863340000	375210000	488130000				332	33;81;82;1658	True;True;True;True	34;85;86;1773	59;171;172;2685	91;248;249;250;251;3862	91;248;250;3862
SPAC607.05	SPAC607.05	1	1	1	>SPAC607.05 |rpn9||19S proteasome regulatory subunit Rpn9|Schizosaccharomyces pombe|chr 1|||Manual	1	1	1	1	3.1	3.1	3.1	43.457	381	381	1.9739e-07	NaN	NaN	NaN	1	41829000	27558000	14271000				333	1374	TRUE	1466	2239	3211	3211
SPAC630.03	SPAC630.03	2	2	2	>SPAC630.03 |arp3|act2|actin-like protein Arp3|Schizosaccharomyces pombe|chr 1|||Manual	1	2	2	2	7.3	7.3	7.3	47.373	427	427	1.2484e-06	NaN	NaN	NaN	1	25209000	14687000	10523000				334	495;1763	True;True	524;1889	828;2866	1205;4115	1205;4115
SPAC630.13c	SPAC630.13c	1	1	1	>SPAC630.13c |tsc2||tuberin|Schizosaccharomyces pombe|chr 1|||Manual	1	1	1	1	0.5	0.5	0.5	154.81	1339	1339	0.0030921	NaN	NaN	NaN	1	11851000	7932400	3918300				335	825	TRUE	874	1361	1959	1959
SPAC637.04	SPAC637.04	4	4	4	>SPAC637.04 |||cargo-transport protein Ypp1 |Schizosaccharomyces pombe|chr 1|||Manual	1	4	4	4	5.1	5.1	5.1	98.306	862	862	2.3673e-37	0.68482	0.81	2.2972	2	46537000	26679000	19859000				336	351;1777;2096;2887	True;True;True;True	369;1904;2243;3138	553;2888;3334;4724	797;4143;4792;4793;6742	797;4143;4793;6742
SPAC637.05c	SPAC637.05c	6	6	6	>SPAC637.05c |vma2||V-type ATPase V1 subunit B|Schizosaccharomyces pombe|chr 1|||Manual	1	6	6	6	21.9	21.9	21.9	55.841	503	503	4.0642e-76	0.73281	0.89727	26.543	6	324600000	172030000	152570000				337	1136;1368;1490;2478;2616;3145	True;True;True;True;True;True	1208;1460;1586;2705;2854;3423	1866;2232;2419;2420;4129;4330;5123;5124	2698;2699;3200;3201;3202;3476;3477;5925;6202;7305;7306	2698;3202;3476;5925;6202;7306
SPAC637.07	SPAC637.07	3	3	3	>SPAC637.07 |moe1||translation initiation factor eIF3d Moe1|Schizosaccharomyces pombe|chr 1|||Manual	1	3	3	3	9.3	9.3	9.3	62.636	567	567	5.1139e-16	0.70577	0.82796	19.16	2	68768000	46283000	22485000				338	289;2692;3035	True;True;True	304;2936;3300	454;4446;4949	654;6368;7066	654;6368;7066
SPAC637.10c	SPAC637.10c	1	1	1	>SPAC637.10c |rpn10|pus1|19S proteasome regulatory subunit Rpn10|Schizosaccharomyces pombe|chr 1|||Manual	1	1	1	1	5.3	5.3	5.3	27.14	243	243	0.0076094	NaN	NaN	NaN	1	10766000	4642100	6123700				339	681	TRUE	721	1148	1647	1647
SPAC644.04	SPAC644.04	2	2	2	>SPAC644.04 |pct1||RNA 5-triphosphatase|Schizosaccharomyces pombe|chr 1|||Manual	1	2	2	2	6.3	6.3	6.3	35.444	303	303	0.0057979	3.0518	2.9332	43.704	9	1701800000	403870000	1297900000				340	2117;2118	True;True	2271;2272	3415;3416;3417;3418;3419;3420;3421;3422;3423	4902;4903;4904;4905;4906;4907;4908;4909;4910;4911;4912;4913;4914;4915	4904;4913
SPAC644.11c	SPAC644.11c	1	1	1	>SPAC644.11c |pkp1||mitochondrial pyruvate dehydrogenase |Schizosaccharomyces pombe|chr 1|||Manual	1	1	1	1	2.8	2.8	2.8	48.187	425	425	0.00020603	NaN	NaN	NaN	0	0	0	0				341	106	TRUE	110	203	290	290
SPBC3B9.13c;SPAC644.15	SPBC3B9.13c;SPAC644.15	1;1	1;1	1;1	>SPBC3B9.13c |rpp102|rpp1-2|60S acidic ribosomal protein Rpp1-2|Schizosaccharomyces pombe|chr 2|||Manual;>SPAC644.15 |rpp101|rpp1-1|60S acidic ribosomal protein Rpp1-1|Schizosaccharomyces pombe|chr 1|||Manual	2	1	1	1	28.2	28.2	28.2	11.171	110	110;109	6.9464e-66	NaN	NaN	NaN	1	131270000	63219000	68048000				342	2659	TRUE	2900	4394	6293;6294	6294
SPAC664.02c	SPAC664.02c	2	2	2	>SPAC664.02c |arp8||actin-like protein, Ino80 complex subunit Arp8|Schizosaccharomyces pombe|chr 1|||Manual	1	2	2	2	2.7	2.7	2.7	75.192	662	662	1.043e-07	1.2135	1.398	54.729	2	23980000	10592000	13388000				343	836;1843	True;True	885;1971	1376;2980	1979;4284	1979;4284
SPAC664.04c;SPBC18H10.14	SPAC664.04c;SPBC18H10.14	9;9	9;9	9;9	>SPAC664.04c |rps1602|rps16-2, rps16|40S ribosomal protein S16 |Schizosaccharomyces pombe|chr 1|||Manual;>SPBC18H10.14 |rps1601|rps16-1|40S ribosomal protein S16 |Schizosaccharomyces pombe|chr 2|||Manual	2	9	9	9	54.3	54.3	54.3	15.395	140	140;140	4.3242e-66	0.73558	0.87892	121.68	11	1130700000	643080000	487650000				344	155;200;201;2145;3202;3542;3588;3667;3668	True;True;True;True;True;True;True;True;True	162;212;213;2311;3483;3859;3909;3997;3998	267;331;332;3481;3482;5201;5754;5818;5819;5958;5959;5960;5961	377;470;471;472;473;474;4989;4990;7413;8243;8244;8245;8335;8336;8337;8534;8535;8536;8537;8538;8539	377;471;474;4990;7413;8245;8336;8538;8539
SPAC664.05	SPAC664.05	3	3	3	>SPAC664.05 |rpl13||60S ribosomal protein L13 |Schizosaccharomyces pombe|chr 1|||Manual	1	3	3	3	13	13	13	23.529	208	208	8.8939e-25	0.66756	0.82649	16.325	6	755920000	407980000	347940000				345	979;1287;3673	True;True;True	1036;1368;4003	1609;2101;2102;2103;5967;5968	2307;3025;3026;3027;3028;3029;8547;8548;8549	2307;3025;8548
SPAC664.06	SPAC664.06	3	3	3	>SPAC664.06 |rlp7|rpl7|ribosomal protein L7-like Rlp7 involved in ribosome biogenesis |Schizosaccharomyces pombe|chr 1|||Manual	1	3	3	3	18.5	18.5	18.5	29.165	249	249	1.2776e-11	0.66081	0.78293	14.961	2	81129000	54940000	26189000				346	760;1451;2272	True;True;True	805;1546;2471	1272;1273;2345;3748	1824;1825;3363;3364;5369	1825;3363;5369
SPAC664.11	SPAC664.11	7	7	7	>SPAC664.11 |ssc1|ssp1|mitochondrial heat shock protein Hsp70|Schizosaccharomyces pombe|chr 1|||Manual	1	7	7	7	15.4	15.4	15.4	72.976	674	674	8.4712e-62	0.73523	0.89588	44.914	7	587210000	355340000	231870000				347	202;455;463;922;1783;3022;3334	True;True;True;True;True;True;True	214;480;490;977;1910;3287;3632	333;710;725;726;1531;2896;4935;5438	475;1032;1059;1060;1061;1062;2201;4152;7045;7046;7774;7775	475;1032;1062;2201;4152;7046;7775
SPAC694.02	SPAC694.02	11	11	11	>SPAC694.02 |||DEAD/DEAH box helicase|Schizosaccharomyces pombe|chr 1|||Manual	1	11	11	11	9.7	9.7	9.7	195.06	1717	1717	8.5595e-96	0.60746	0.71969	22.902	11	373470000	219090000	154380000				348	12;128;129;761;765;854;1676;2838;2954;3001;3318	True;True;True;True;True;True;True;True;True;True;True	12;134;135;806;810;903;1792;3088;3212;3263;3616	31;233;234;1274;1279;1420;1421;2730;4663;4838;4902;5412	46;330;331;332;1826;1827;1834;1835;2037;2038;2039;3922;6657;6658;6910;6997;7724	46;330;332;1826;1835;2038;3922;6658;6910;6997;7724	143	1363
SPAC694.05c;SPBC3D6.15	SPAC694.05c;SPBC3D6.15	15;14	15;14	15;14	>SPAC694.05c |rps2502|rps25-2, rps25|40S ribosomal protein S25 |Schizosaccharomyces pombe|chr 1|||Manual;>SPBC3D6.15 |rps2501|rps25-1|40S ribosomal protein S25 |Schizosaccharomyces pombe|chr 2|||Manual	2	15	15	15	85.4	85.4	85.4	9.9586	89	89;88	9.7555e-66	0.81077	0.99405	16.745	18	1051600000	495000000	556640000				349	257;434;435;440;709;710;1018;1155;1156;1358;1360;2142;2422;2769;2770	True;True;True;True;True;True;True;True;True;True;True;True;True;True;True	272;458;459;464;752;753;1077;1227;1228;1450;1452;2307;2644;3018;3019	407;408;681;682;690;691;1195;1196;1677;1891;1892;1893;1894;2219;2222;3475;4051;4546;4547	578;579;580;987;988;989;990;1000;1001;1002;1717;1718;1719;1720;1721;2404;2405;2728;2729;2730;2731;2732;2733;3184;3187;3188;4979;5816;6503;6504	579;987;989;1001;1718;1719;2405;2730;2732;3184;3188;4979;5816;6503;6504	144	49
SPAC6B12.07c	SPAC6B12.07c	1	1	1	>SPAC6B12.07c |||ubiquitin-protein ligase E3 |Schizosaccharomyces pombe|chr 1|||Manual	1	1	1	1	2.1	2.1	2.1	53.403	470	470	6.925e-06	NaN	NaN	NaN	1	30115000	16090000	14024000				350	724	TRUE	767	1211	1741	1741
SPAC6B12.12	SPAC6B12.12	2	2	2	>SPAC6B12.12 |tom70||mitochondrial TOM complex subunit Tom70 |Schizosaccharomyces pombe|chr 1|||Manual	1	2	2	2	5.1	5.1	5.1	69.516	625	625	4.7372e-19	0.79834	0.96488	15.275	2	121780000	59548000	62235000				351	163;826	True;True	172;875	278;1362	394;395;1960;1961	394;1961
SPAC6B12.15	SPAC6B12.15	6	6	6	>SPAC6B12.15 |cpc2|rkp1|RACK1 ortholog Cpc2|Schizosaccharomyces pombe|chr 1|||Manual	1	6	6	6	15.6	15.6	15.6	34.851	314	314	2.7767e-34	0.86875	1.0465	44.197	5	521370000	258830000	262540000				352	437;787;2773;2774;2775;3662	True;True;True;True;True;True	461;833;3023;3024;3025;3992	684;1309;4551;4552;4553;5953	992;1883;1884;6509;6510;6511;8527;8528	992;1884;6509;6510;6511;8528
SPAC6C3.04	SPAC6C3.04	1	1	1	>SPAC6C3.04 |cit1||citrate synthase Cit1|Schizosaccharomyces pombe|chr 1|||Manual	1	1	1	1	3.3	3.3	3.3	54.16	483	483	0.00046878	NaN	NaN	NaN	0	0	0	0				353	2845	TRUE	3095	4671	6667	6667
SPAC6F12.05c	SPAC6F12.05c	6	6	6	>SPAC6F12.05c |tnr3||thiamine diphosphokinase Tnr3|Schizosaccharomyces pombe|chr 1|||Manual	1	6	6	6	17.4	17.4	17.4	64.235	569	569	8.8279e-42	0.65914	0.80633	9.7558	7	293830000	175130000	118700000				354	236;1064;1140;1244;2709;3367	True;True;True;True;True;True	250;1126;1212;1321;2955;3669	375;376;1746;1870;2034;2035;4474;5486	528;529;2509;2510;2511;2703;2704;2924;2925;6401;7851	529;2510;2704;2925;6401;7851
SPAC6F12.07	SPAC6F12.07	2	2	2	>SPAC6F12.07 |tom20||mitochondrial TOM complex subunit Tom20 |Schizosaccharomyces pombe|chr 1|||Manual	1	2	2	2	23	23	23	17.529	152	152	3.4408e-19	0.9012	1.0189	1.0775	2	261610000	127250000	134360000				355	851;3308	True;True	900;3604	1403;5394	2018;2019;7699;7700	2018;7700
SPAC6F12.10c	SPAC6F12.10c	1	1	1	>SPAC6F12.10c |ade3|min11|phosphoribosylformylglycinamidine synthase Ade3 |Schizosaccharomyces pombe|chr 1|||Manual	1	1	1	1	1.5	1.5	1.5	144.86	1323	1323	9.1117e-12	NaN	NaN	NaN	1	66023000	27799000	38225000				356	719	TRUE	762	1206	1736	1736
SPAC6F12.11c	SPAC6F12.11c	1	1	1	>SPAC6F12.11c |sfc1||transcription factor TFIIIC complex A box associated subunit Sfc1|Schizosaccharomyces pombe|chr 1|||Manual	1	1	1	1	3.3	3.3	3.3	52.744	456	456	1.6438e-06	NaN	NaN	NaN	1	15449000	8325800	7122700				357	3160	TRUE	3438	5141	7330;7331	7331
SPAC6F12.13c	SPAC6F12.13c	1	1	1	>SPAC6F12.13c |fps1||geranyltranstransferase Fps1|Schizosaccharomyces pombe|chr 1|||Manual	1	1	1	1	2.6	2.6	2.6	39.516	347	347	0.00023426	NaN	NaN	NaN	1	42942000	20231000	22711000				358	2762	TRUE	3011	4539	6493;6494	6493
SPAC6F6.03c	SPAC6F6.03c	3	3	3	>SPAC6F6.03c |||ribosome export GTPase |Schizosaccharomyces pombe|chr 1|||Manual	1	3	3	3	10.1	10.1	10.1	59.913	537	537	1.9264e-18	1.7835	2.2309	106.7	2	136160000	54638000	81519000				359	1949;3386;3442	True;True;True	2087;3689;3747	3128;5512;5593	4488;7889;8016	4488;7889;8016
SPAC6F6.07c	SPAC6F6.07c	3	3	3	>SPAC6F6.07c |rps13||40S ribosomal protein S13 |Schizosaccharomyces pombe|chr 1|||Manual	1	3	3	3	39.7	39.7	39.7	16.953	151	151	8.5674e-38	0.60727	0.62017	5.6138	4	561320000	334160000	227160000				360	237;1527;3413	True;True;True	251;1627;3717	377;378;2479;5550	530;531;532;533;534;535;3563;3564;3565;7953	531;3565;7953
SPAC6F6.11c	SPAC6F6.11c	1	1	1	>SPAC6F6.11c |||pyridoxine-pyridoxal-pyridoxamine kinase |Schizosaccharomyces pombe|chr 1|||Manual	1	1	1	1	4.5	4.5	4.5	33.998	309	309	0.0074373	NaN	NaN	NaN	0	0	0	0				361	2703	TRUE	2948	4460	6386	6386
SPAC6F6.15	SPAC6F6.15	1	1	1	>SPAC6F6.15 |ypt5||GTPase Ypt5|Schizosaccharomyces pombe|chr 1|||Manual	1	1	1	1	6.6	6.6	6.6	22.985	211	211	8.3572e-07	NaN	NaN	NaN	1	19714000	12146000	7568300				362	3057	TRUE	3324	4981	7108	7108
SPAC6G10.02c	SPAC6G10.02c	19	19	19	>SPAC6G10.02c |tea3||cell end marker Tea3|Schizosaccharomyces pombe|chr 1|||Manual	1	19	19	19	25.1	25.1	25.1	127.75	1125	1125	0	0.55227	0.61598	22.766	28	2582300000	1625600000	956670000				363	188;189;240;370;462;754;1116;1328;1431;1432;1472;1515;2339;2370;2466;2910;3422;3705;3789	True;True;True;True;True;True;True;True;True;True;True;True;True;True;True;True;True;True;True	199;200;254;388;489;799;1187;1415;1525;1526;1567;1613;2545;2582;2693;3162;3727;4038;4128	313;314;315;382;572;724;1263;1264;1841;2177;2318;2319;2320;2371;2455;2456;3851;3852;3903;3904;4115;4116;4760;4761;5563;6020;6021;6147;6148	440;441;442;443;541;542;824;825;826;1056;1057;1058;1812;1813;2659;3126;3322;3323;3324;3408;3409;3526;3527;5510;5511;5589;5590;5591;5592;5593;5905;5906;5907;6794;6795;6796;7967;8618;8619;8620;8621;8622;8806;8807;8808	442;443;541;825;1058;1812;2659;3126;3323;3324;3409;3526;5511;5593;5905;6794;7967;8619;8806
SPAC6G10.03c	SPAC6G10.03c	1	1	1	>SPAC6G10.03c |||mitochondrial cardiolipin-specific phospholipase |Schizosaccharomyces pombe|chr 1|||Manual	1	1	1	1	4.7	4.7	4.7	48.72	428	428	0.012884	NaN	NaN	NaN	0	0	0	0				364	1821	TRUE	1949	2951	4241	4241
SPAC6G10.05c	SPAC6G10.05c	2	2	2	>SPAC6G10.05c |trs120||TRAPP complex subunit Trs120 |Schizosaccharomyces pombe|chr 1|||Manual	1	2	2	2	2.2	2.2	2.2	137.76	1210	1210	5.674e-12	0.46941	0.55566	5.9574	2	29311000	19561000	9749800				365	2719;2825	True;True	2965;3075	4485;4646;4647	6422;6636;6637	6422;6637
SPAC6G10.08	SPAC6G10.08	3	3	3	>SPAC6G10.08 |idp1||isocitrate dehydrogenase Idp1 |Schizosaccharomyces pombe|chr 1|||Manual	1	3	3	3	9.6	9.6	9.6	49.478	439	439	1.063e-09	1.5801	1.9415	38.788	4	383910000	139880000	244030000				366	2264;3273;3766	True;True;True	2463;3566;4103	3738;3739;5332;6107	5352;5353;5354;5355;7605;8747	5355;7605;8747
SPAC6G10.09	SPAC6G10.09	2	2	2	>SPAC6G10.09 |||alpha glucosidase I Gls1 |Schizosaccharomyces pombe|chr 1|||Manual	1	2	2	2	2.8	2.8	2.8	92.888	808	808	0.00089581	NaN	NaN	NaN	1	33837000	13202000	20635000				367	441;1805	True;True	465;1933	692;2924	1003;4196	1003;4196
SPAC6G9.09c;SPCC330.14c	SPAC6G9.09c;SPCC330.14c	1;1	1;1	1;1	>SPAC6G9.09c |rpl2401|rpl24-01, rpl24|60S ribosomal protein L24 |Schizosaccharomyces pombe|chr 1|||Manual;>SPCC330.14c |rpl2402|rpl24-2|60S ribosomal protein L24 |Schizosaccharomyces pombe|chr 3|||Manual	2	1	1	1	5.4	5.4	5.4	16.836	149	149;149	0.0011977	NaN	NaN	NaN	1	19502000	9312900	10189000				368	2030	TRUE	2173	3231	4638;4639	4638
SPAC977.14c;SPAC750.01	SPAC977.14c;SPAC750.01	1;1	1;1	1;1	>SPAC977.14c |||aldo/keto reductase, unknown biological role|Schizosaccharomyces pombe|chr 1|||Manual;>SPAC750.01 |||aldo/keto reductase family protein|Schizosaccharomyces pombe|chr 1|||Manual	2	1	1	1	3.7	3.7	3.7	39.914	351	351;325	0.00027104	NaN	NaN	NaN	1	20138000	10787000	9351100				369	3127	TRUE	3405	5096	7270;7271	7271
SPAC767.01c	SPAC767.01c	6	6	6	>SPAC767.01c |vps1|SPAC9G1.14c|dynamin family protein Vps1|Schizosaccharomyces pombe|chr 1|||Manual	1	6	6	6	14.7	14.7	14.7	75.79	678	678	9.1724e-69	1.0795	1.208	22.768	5	252880000	106780000	146100000				370	1158;1314;1492;2930;3381;3820	True;True;True;True;True;True	1230;1400;1588;3185;3683;4161	1896;2159;2422;4802;5505;6195;6196	2735;3099;3100;3480;6864;7881;8883;8884	2735;3100;3480;6864;7881;8884
SPAC7D4.07c	SPAC7D4.07c	1	1	1	>SPAC7D4.07c |trx1||cytosolic thioredoxin Trx1|Schizosaccharomyces pombe|chr 1|||Manual	1	1	1	1	14.6	14.6	14.6	11.297	103	103	0.0048178	1.0729	1.1669	4.0391	2	26968000	12701000	14267000				371	2237	TRUE	2433	3698;3699	5295;5296	5296
SPAC806.03c	SPAC806.03c	2	2	1	>SPAC806.03c |rps2601|rps26-1, rps26|40S ribosomal protein S26 |Schizosaccharomyces pombe|chr 1|||Manual	1	2	2	1	20	20	20	13.876	120	120	4.4616e-08	0.75838	0.91953	21.17	3	103440000	58220000	45221000				372	2332;2333	True;True	2537;2538;2539	3841;3842;3843	5496;5497;5498;5499	5496;5497	145	44
SPAC821.05	SPAC821.05	1	1	1	>SPAC821.05 |||translation initiation factor eIF3h |Schizosaccharomyces pombe|chr 1|||Manual	1	1	1	1	3.6	3.6	3.6	39.78	357	357	1.5911e-09	0.58374	0.62557	11.763	2	144040000	83606000	60436000				373	1845	TRUE	1973;1974	2982;2983	4286;4287;4288	4287	146	332
SPAC821.11	SPAC821.11	1	1	1	>SPAC821.11 |pro1||gamma-glutamyl phosphate reductase Pro1 |Schizosaccharomyces pombe|chr 1|||Manual	1	1	1	1	5.8	5.8	5.8	48.706	451	451	6.9691e-20	NaN	NaN	NaN	1	45733000	25208000	20525000				374	2207	TRUE	2401	3636	5212	5212
SPAC823.08c	SPAC823.08c	1	1	1	>SPAC823.08c |||ATP-dependent RNA helicase Rrp3 |Schizosaccharomyces pombe|chr 1|||Manual	1	1	1	1	1.5	1.5	1.5	51.863	465	465	0.0016498	NaN	NaN	NaN	1	13380000	7347200	6033300				375	3778	TRUE	4117	6135	8788;8789	8788
SPAC823.12	SPAC823.12	1	1	1	>SPAC823.12 |vps11||HOPs complex subunit Pep5/Vps11 |Schizosaccharomyces pombe|chr 1|||Manual	1	1	1	1	1.4	1.4	1.4	102.52	906	906	2.6453e-09	NaN	NaN	NaN	1	49136000	27385000	21750000				376	1806	TRUE	1934	2925	4197;4198	4198
SPAC824.06	SPAC824.06	1	1	1	>SPAC824.06 |tim14||TIM23 translocase complex subunit Tim14 |Schizosaccharomyces pombe|chr 1|||Manual	1	1	1	1	12.9	12.9	12.9	15.271	140	140	2.0347e-06	NaN	NaN	NaN	1	11087000	4366700	6720300				377	2950	TRUE	3208	4834	6905	6905
SPAC890.04c	SPAC890.04c	3	3	3	>SPAC890.04c |||ribosome biogenesis protein Ytm1 |Schizosaccharomyces pombe|chr 1|||Manual	1	3	3	3	10	10	10	48.334	440	440	8.3062e-12	0.84622	0.92107	69.342	3	57879000	36945000	20934000				378	3091;3125;3743	True;True;True	3364;3403;4078	5038;5094;6074	7189;7267;8705;8706	7189;7267;8705
SPAC890.05	SPAC890.05	1	1	1	>SPAC890.05 |||ribosome biogenesis protein, G-pathc domain, PINX1 family |Schizosaccharomyces pombe|chr 1|||Manual	1	1	1	1	6	6	6	31.878	284	284	1.6765e-05	NaN	NaN	NaN	1	26337000	11025000	15312000				379	30	TRUE	31	56	85;86	85
SPAC890.08	SPAC890.08	2	2	2	>SPAC890.08 |rpl31||60S ribosomal protein L31 |Schizosaccharomyces pombe|chr 1|||Manual	1	2	2	2	15	15	15	13.261	113	113	0.0010728	0.9958	1.2156	39.07	2	17004000	8663700	8340500				380	2607;2649	True;True	2845;2889	4319;4377	6184;6269	6184;6269
SPAC8C9.12c	SPAC8C9.12c	1	1	1	>SPAC8C9.12c |||mitochondrial iron ion transporter |Schizosaccharomyces pombe|chr 1|||Manual	1	1	1	1	4.3	4.3	4.3	32.652	303	303	1.3161e-08	NaN	NaN	NaN	0	0	0	0				381	715	TRUE	758	1202	1730	1730
SPAC8C9.14	SPAC8C9.14	6	6	6	>SPAC8C9.14 |prr1||transcription factor Prr1|Schizosaccharomyces pombe|chr 1|||Manual	1	6	6	6	14.5	14.5	14.5	60.045	539	539	5.1586e-36	0.88019	0.98299	23.313	6	251990000	131440000	120540000				382	772;1842;2044;2045;2315;2427	True;True;True;True;True;True	817;1970;2189;2190;2515;2649;2650	1287;2979;3253;3254;3804;4056;4057	1844;4282;4283;4676;4677;4678;4679;5442;5823;5824	1844;4282;4677;4678;5442;5823	147	197
SPAC8E11.02c	SPAC8E11.02c	3	3	3	>SPAC8E11.02c |rad24||14-3-3 protein Rad24|Schizosaccharomyces pombe|chr 1|||Manual	1	3	3	3	24.4	24.4	24.4	30.082	270	270	2.0936e-46	0.91431	0.96048	10.804	3	173960000	103010000	70950000				383	1093;2418;2465	True;True;True	1158;2640;2692	1798;4045;4114	2592;5808;5903;5904	2592;5808;5903
SPAC8E11.10	SPAC8E11.10	2	2	2	>SPAC8E11.10 |||sorbose reductase |Schizosaccharomyces pombe|chr 1|||Manual	1	2	2	2	12.9	12.9	12.9	27.437	255	255	2.3303e-21	0.86885	0.9881	26.661	2	102520000	56046000	46471000				384	176;3639	True;True	186;3967	296;5921	420;8480	420;8480
SPAC8F11.04	SPAC8F11.04	3	3	3	>SPAC8F11.04 |||U3 snoRNP-associated protein Cic1/Utp30 family |Schizosaccharomyces pombe|chr 1|||Manual	1	3	3	3	16.9	16.9	16.9	41.357	373	373	1.1637e-17	0.79936	0.91649	17.034	3	180290000	91087000	89201000				385	361;1154;3270	True;True;True	379;1226;3563	563;1890;5329	809;2727;7601	809;2727;7601
SPAC9.03c	SPAC9.03c	5	5	5	>SPAC9.03c |brr2|spp41|U5 snRNP complex subunit Brr2 |Schizosaccharomyces pombe|chr 1|||Manual	1	5	5	5	2.5	2.5	2.5	248.81	2176	2176	2.6736e-16	0.65371	0.79063	33.444	3	82312000	43421000	38892000				386	228;541;2562;2639;3726	True;True;True;True;True	241;571;2795;2879;4061	365;933;4256;4363;6050	516;1343;6093;6249;8672	516;1343;6093;6249;8672
SPAC9.07c	SPAC9.07c	4	4	4	>SPAC9.07c |||GTPase Rbg1 |Schizosaccharomyces pombe|chr 1|||Manual	1	4	4	4	17.2	17.2	17.2	40.375	366	366	1.8191e-26	0.73026	0.80686	3.083	4	166260000	94295000	71965000				387	870;1381;3424;3672	True;True;True;True	919;1473;3729;4002	1439;2249;5566;5567;5966	2063;3224;3225;7971;7972;7973;8546	2063;3225;7972;8546
SPAC9.09	SPAC9.09	20	20	20	>SPAC9.09 |met26||homocysteine methyltransferase Met26|Schizosaccharomyces pombe|chr 1|||Manual	1	20	20	20	41.5	41.5	41.5	85.339	764	764	1.4082e-162	0.87614	1.0712	22.94	29	4064900000	1945000000	2119900000				388	177;256;383;508;935;946;947;959;1137;1795;1890;1891;2005;2514;2563;3563;3575;3685;3686;3830	True;True;True;True;True;True;True;True;True;True;True;True;True;True;True;True;True;True;True;True	187;271;402;403;537;990;1001;1002;1015;1209;1923;2019;2020;2145;2146;2743;2796;3882;3895;4017;4018;4171	297;406;587;588;589;844;845;1547;1548;1562;1563;1577;1867;2911;3035;3036;3037;3201;3202;4185;4257;5781;5782;5799;5800;5801;5994;5995;6207;6208;6209	421;422;576;577;846;847;848;849;850;1224;1225;1226;2222;2223;2224;2242;2243;2244;2264;2265;2700;4173;4351;4352;4353;4354;4355;4598;4599;4600;5997;5998;5999;6094;6095;8281;8282;8283;8307;8308;8309;8310;8311;8312;8586;8587;8588;8899;8900;8901;8902	422;577;847;1225;2223;2242;2243;2265;2700;4173;4352;4353;4599;5999;6094;8282;8311;8586;8588;8900	148;149	97;543
SPAC9.10	SPAC9.10	1	1	1	>SPAC9.10 |thi9||thiamine transporter Thi9|Schizosaccharomyces pombe|chr 1|||Manual	1	1	1	1	2.5	2.5	2.5	65.069	591	591	0.011644	NaN	NaN	NaN	1	16547000	9547400	6999300				389	421	TRUE	445	663	961	961
SPAC926.04c	SPAC926.04c	10	10	10	>SPAC926.04c |hsp90|swo1, git10|Hsp90 chaperone|Schizosaccharomyces pombe|chr 1|||Manual	1	10	10	10	22.7	22.7	22.7	80.595	704	704	2.6508e-140	1.005	1.133	27.139	14	1059900000	501710000	558230000				390	368;481;1121;1327;1532;1724;1750;3017;3802;3811	True;True;True;True;True;True;True;True;True;True	386;508;1192;1414;1633;1846;1847;1875;3282;4141;4151	570;748;1848;1849;2175;2176;2489;2807;2808;2848;2849;4930;6164;6182;6183	822;1093;1094;2669;2670;2671;2672;3123;3124;3125;3580;4032;4033;4090;4091;4092;7039;8835;8836;8863;8864;8865;8866;8867	822;1093;2669;3125;3580;4033;4092;7039;8835;8867	150	178
SPAC926.07c	SPAC926.07c	1	1	1	>SPAC926.07c |dlc2||dynein light chain Dlc2 |Schizosaccharomyces pombe|chr 1|||Manual	1	1	1	1	15.3	15.3	15.3	9.8224	85	85	2.5849e-06	NaN	NaN	NaN	1	19382000	10235000	9147000				391	799	TRUE	845	1326	1913	1913
SPAC926.08c	SPAC926.08c	2	2	2	>SPAC926.08c |||Brix domain protein Rpf2 |Schizosaccharomyces pombe|chr 1|||Manual	1	2	2	2	8.5	8.5	8.5	36.071	317	317	2.6023e-10	0.67524	0.79826	41.745	2	101550000	41817000	59735000				392	2835;3488	True;True	3085;3802	4659;4660;5689	6652;6653;8156	6652;8156
SPAC926.09c	SPAC926.09c	30	30	30	>SPAC926.09c |fas1||fatty acid synthase beta subunit Fas1|Schizosaccharomyces pombe|chr 1|||Manual	1	30	30	30	22.2	22.2	22.2	230.56	2073	2073	1.3612e-272	0.68836	0.85945	22.983	37	2436400000	1301100000	1135300000				393	97;133;244;449;563;618;905;944;951;1009;1038;1088;1108;1193;1538;1548;1819;1953;2066;2757;2850;2891;3102;3284;3323;3325;3383;3475;3540;3669	True;True;True;True;True;True;True;True;True;True;True;True;True;True;True;True;True;True;True;True;True;True;True;True;True;True;True;True;True;True	101;139;258;474;594;655;960;999;1006;1007;1068;1098;1153;1179;1265;1641;1656;1947;2092;2211;3006;3100;3142;3376;3579;3621;3623;3685;3686;3784;3857;3999	192;238;389;702;971;1063;1505;1559;1560;1568;1569;1663;1664;1665;1705;1706;1792;1831;1832;1942;2502;2527;2947;2948;3135;3280;4534;4677;4730;4731;5053;5054;5354;5355;5417;5420;5507;5508;5664;5665;5752;5962;5963	276;277;337;552;553;1021;1397;1528;1529;2161;2239;2240;2251;2252;2253;2383;2384;2385;2386;2448;2449;2450;2583;2584;2648;2649;2799;2800;3597;3598;3633;4235;4236;4237;4238;4495;4496;4497;4716;4717;6488;6673;6749;6750;6751;6752;7210;7211;7641;7642;7730;7731;7735;7883;7884;8117;8118;8119;8120;8241;8540;8541;8542;8543	276;337;552;1021;1397;1528;2161;2239;2252;2385;2449;2584;2649;2800;3598;3633;4237;4497;4716;6488;6673;6750;7211;7641;7731;7735;7884;8118;8241;8543	151;152	853;1874
SPAC959.08	SPAC959.08	2	1	1	>SPAC959.08 |rpl2102|rpl21-2, rpl21|60S ribosomal protein L21 |Schizosaccharomyces pombe|chr 1|||Manual	1	2	1	1	30.6	19.4	19.4	18.353	160	160	1.182e-27	NaN	NaN	NaN	1	36709000	24232000	12477000				394	2618;3128	True;False	2856;3406	4333;5097	6205;7272	6205;7272
SPAC977.12;SPBPB8B6.05c	SPAC977.12;SPBPB8B6.05c	1;1	1;1	1;1	>SPAC977.12 |||L-asparaginase |Schizosaccharomyces pombe|chr 1|||Manual;>SPBPB8B6.05c |||L-asparaginase |Schizosaccharomyces pombe|chr 2|||Manual	2	1	1	1	3.7	3.7	3.7	38.115	356	356;356	3.8049e-09	NaN	NaN	NaN	1	24981000	8008000	16973000				395	3398	TRUE	3702	5529	7923;7924	7924
SPAC9E9.03	SPAC9E9.03	3	3	3	>SPAC9E9.03 |leu2||3-isopropylmalate dehydratase Leu2 |Schizosaccharomyces pombe|chr 1|||Manual	1	3	3	3	7.1	7.1	7.1	82.782	758	758	1.0489e-33	NaN	NaN	NaN	1	36547000	21936000	14611000				396	535;3258;3448	True;True;True	565;3549;3754	924;925;5311;5603	1334;1335;7576;7577;8028	1335;7577;8028	153	112
SPAC9E9.07c	SPAC9E9.07c	1	1	1	>SPAC9E9.07c |ypt2||GTPase Ypt2|Schizosaccharomyces pombe|chr 1|||Manual	1	1	1	1	8	8	8	22.755	200	200	3.9451e-06	NaN	NaN	NaN	1	59303000	30975000	28328000				397	3319	TRUE	3617	5413	7725	7725
SPAC9E9.09c	SPAC9E9.09c	8	8	8	>SPAC9E9.09c |||aldehyde dehydrogenase |Schizosaccharomyces pombe|chr 1|||Manual	1	8	8	8	35.6	35.6	35.6	54.768	503	503	5.8514e-160	0.82014	0.98121	15.166	10	2634000000	1371700000	1262300000				398	362;823;1065;3056;3329;3600;3682;3836	True;True;True;True;True;True;True;True	380;872;1127;3323;3627;3927;4014;4178	564;1359;1747;4980;5432;5857;5858;5990;5991;6219;6220	810;811;1957;2512;7106;7107;7764;7765;7766;8399;8400;8580;8581;8582;8914;8915;8916	811;1957;2512;7107;7766;8399;8581;8916
SPAC9E9.10c	SPAC9E9.10c	1	1	1	>SPAC9E9.10c |cbh1|cbh|CENP-B homolog Cbh1|Schizosaccharomyces pombe|chr 1|||Manual	1	1	1	1	2.5	2.5	2.5	59.865	514	514	0.00066363	NaN	NaN	NaN	1	70120000	24977000	45144000				399	278	TRUE	293	437	623	623
SPAC9G1.02	SPAC9G1.02	2	2	2	>SPAC9G1.02 |wis4|wak1, wik1|MAP kinase kinase kinase Wis4|Schizosaccharomyces pombe|chr 1|||Manual	1	2	2	2	2	2	2	160.54	1401	1401	1.6102e-18	NaN	NaN	NaN	1	22879000	12655000	10224000				400	1662;2894	True;True	1777;3145	2689;4734;4735	3869;3870;6755;6756	3869;6756
SPAC9G1.03c	SPAC9G1.03c	5	5	5	>SPAC9G1.03c |rpl3001|rpl30-1, rpl30|60S ribosomal protein L30 |Schizosaccharomyces pombe|chr 1|||Manual	1	5	5	5	41.3	41.3	41.3	11.591	109	109	5.2818e-23	0.69864	0.82424	31.91	4	181010000	104410000	76593000				401	173;246;1600;1789;2693	True;True;True;True;True	183;260;1712;1916;2937	293;393;2602;2603;2904;4447	414;557;3735;3736;3737;4163;4164;6369	414;557;3736;4163;6369
SPAC9G1.13c	SPAC9G1.13c	1	1	1	>SPAC9G1.13c |swc4||Swr1 complex subunit Swc4|Schizosaccharomyces pombe|chr 1|||Manual	1	1	1	1	3.7	3.7	3.7	50.383	437	437	3.7903e-18	NaN	NaN	NaN	1	32202000	22179000	10023000				402	809	TRUE	855	1338	1929	1929
SPACUNK4.10	SPACUNK4.10	1	1	1	>SPACUNK4.10 |||glyoxylate reductase |Schizosaccharomyces pombe|chr 1|||Manual	1	1	1	1	3.6	3.6	3.6	36.701	334	334	0.00036807	NaN	NaN	NaN	0	0	0	0				403	3191	TRUE	3471	5183	7390	7390
SPACUNK4.16c	SPACUNK4.16c	2	2	2	>SPACUNK4.16c |||alpha,alpha-trehalose-phosphate synthase |Schizosaccharomyces pombe|chr 1|||Manual	1	2	2	2	3	3	3	106.82	944	944	3.5985e-05	0.82937	0.95042	38.737	2	45864000	24687000	21176000				404	2266;3065	True;True	2465;3333	3741;4996	5359;7133;7134	5359;7133
SPAP27G11.10c	SPAP27G11.10c	1	1	1	>SPAP27G11.10c |nup184||nucleoporin Nup184|Schizosaccharomyces pombe|chr 1|||Manual	1	1	1	1	0.8	0.8	0.8	176.96	1564	1564	4.4791e-13	NaN	NaN	NaN	0	0	0	0				405	1446	TRUE	1541	2339	3355	3355
SPAP27G11.13c	SPAP27G11.13c	4	4	4	>SPAP27G11.13c |nop10||snoRNP pseudouridylase box H/ACA snoRNP complex protein |Schizosaccharomyces pombe|chr 1|||Manual	1	4	4	4	56.2	56.2	56.2	7.6578	64	64	3.6722e-22	1.1032	1.3293	33.298	11	497710000	218510000	279200000				406	702;786;2135;2571	True;True;True;True	745;832;2297;2298;2299;2804	1186;1187;1307;1308;3458;3459;3460;3461;3462;3463;3464;3465;4267	1707;1708;1881;1882;4958;4959;4960;4961;4962;4963;4964;4965;4966;6112	1707;1882;4960;6112	154;155	1;4
SPAP7G5.02c	SPAP7G5.02c	2	2	2	>SPAP7G5.02c |gua2||GMP synthase [glutamine-hydrolyzing] Gua2 |Schizosaccharomyces pombe|chr 1|||Manual	1	2	2	2	4.8	4.8	4.8	60.044	539	539	2.4726e-14	0.62866	0.81632	2.2417	2	71390000	37284000	34107000				407	1259;1780	True;True	1338;1907	2054;2891	2952;4146	2952;4146
SPAP7G5.04c	SPAP7G5.04c	4	4	4	>SPAP7G5.04c |lys1||aminoadipate-semialdehyde dehydrogenase|Schizosaccharomyces pombe|chr 1|||Manual	1	4	4	4	4.8	4.8	4.8	156.89	1419	1419	2.282e-45	0.9731	1.1949	29.693	7	391960000	174350000	217610000				408	837;3100;3176;3655	True;True;True;True	886;3374;3454;3985	1377;5049;5050;5164;5943;5944;5945;5946	1980;7205;7206;7365;7366;8516;8517;8518;8519;8520	1980;7206;7366;8520
SPAP7G5.05	SPAP7G5.05	4	1	1	>SPAP7G5.05 |rpl1002|rpl10-2, rpl10|60S ribosomal protein L10|Schizosaccharomyces pombe|chr 1|||Manual	1	4	1	1	30.8	5	5	25.359	221	221	1.1837e-33	0.80794	0.98795	34.373	2	83641000	39306000	44335000				409	115;993;1225;3545	False;False;False;True	119;1052;1300;3863	214;215;1641;1995;5759;5760	303;304;2348;2349;2870;8253;8254	303;2349;2870;8253	156	136
SPAP8A3.07c	SPAP8A3.07c	2	2	2	>SPAP8A3.07c |||phospho-2-dehydro-3-deoxyheptonate aldolase |Schizosaccharomyces pombe|chr 1|||Manual	1	2	2	2	13.7	13.7	13.7	40.638	372	372	6.7408e-08	0.89526	1.06	21.255	2	100840000	58799000	42044000				410	560;2500	True;True	591;2728	966;967;4162	1390;1391;5965	1391;5965
SPAP8A3.08	SPAP8A3.08	3	3	3	>SPAP8A3.08 |cdc4||myosin II light chain|Schizosaccharomyces pombe|chr 1|||Manual	1	3	3	3	28.4	28.4	28.4	15.661	141	141	7.124e-16	NaN	NaN	NaN	1	23243000	14119000	9124500				411	859;2972;2973	True;True;True	908;3232;3233	1426;4864;4865	2046;6944;6945	2046;6944;6945
SPAP8A3.09c	SPAP8A3.09c	2	2	2	>SPAP8A3.09c |paa1||protein phosphatase regulatory subunit Paa1|Schizosaccharomyces pombe|chr 1|||Manual	1	2	2	2	7.5	7.5	7.5	66.616	590	590	3.1945e-33	0.65871	0.78001	19.235	2	75456000	43591000	31865000				412	1461;1663	True;True	1556;1778	2358;2690	3383;3384;3871;3872	3383;3871
SPAPB17E12.11	SPAPB17E12.11	3	3	3	>SPAPB17E12.11 |||oligosaccharyltransferase gamma subunit Ost3 |Schizosaccharomyces pombe|chr 1|||Manual	1	3	3	3	15.5	15.5	15.5	34.983	309	309	3.2734e-28	1.0208	1.0116	59.892	4	254330000	124600000	129730000				413	2296;2787;2788	True;True;True	2495;3037;3038	3780;4566;4567;4568	5408;5409;6529;6530;6531	5408;6529;6531
SPAPB17E12.13	SPAPB17E12.13	6	6	3	>SPAPB17E12.13 |rpl1802|rpl18-2|60S ribosomal protein L18 |Schizosaccharomyces pombe|chr 1|||Manual	1	6	6	3	33.7	33.7	27.3	21.184	187	187	3.892e-72	0.70801	0.86968	19.509	5	413820000	216180000	197630000				414	94;95;520;1058;2022;3293	True;True;True;True;True;True	98;99;549;1120;2164;3588	188;189;190;900;1736;3221;5369	270;271;272;273;1298;1299;2496;4624;7663	270;273;1299;2496;4624;7663
SPAPB1E7.07	SPAPB1E7.07	19	19	19	>SPAPB1E7.07 |glt1||glutamate synthase Glt1 |Schizosaccharomyces pombe|chr 1|||Manual	1	19	19	19	14.3	14.3	14.3	232.85	2111	2111	3.0015e-151	0.8871	1.0028	29.553	21	1328400000	656230000	672170000				415	45;99;140;596;682;899;1028;1389;1447;1752;1840;2080;2360;2515;2847;3349;3358;3559;3713	True;True;True;True;True;True;True;True;True;True;True;True;True;True;True;True;True;True;True	48;103;146;631;722;953;954;1088;1481;1542;1878;1968;2226;2571;2744;3097;3649;3660;3878;4048	80;194;245;1029;1030;1149;1150;1496;1497;1498;1691;2259;2260;2340;2853;2977;3303;3888;4186;4673;5461;5474;5777;6033;6034	114;279;345;1484;1485;1648;1649;1650;1651;1652;2147;2148;2149;2150;2426;3238;3239;3240;3356;4097;4098;4279;4280;4748;5566;6000;6001;6669;7811;7812;7833;7834;8276;8641;8642	114;279;345;1485;1650;2149;2426;3239;3356;4098;4279;4748;5566;6001;6669;7812;7833;8276;8641
SPAPB1E7.12	SPAPB1E7.12	5	5	1	>SPAPB1E7.12 |rps602|rps6-2, rps6|40S ribosomal protein S6 |Schizosaccharomyces pombe|chr 1|||Manual	1	5	5	1	31	31	7.1	27.475	239	239	7.0492e-82	0.70952	0.91958	15.791	11	1373100000	749710000	623350000				416	675;845;1436;2133;2447	True;True;True;True;True	715;894;1530;1531;2293;2294;2672;2673	1141;1142;1388;1389;2325;2326;2327;2328;3453;3454;4088;4089	1636;1637;1638;1639;1995;1996;1997;1998;3331;3332;3333;3334;3335;3336;3337;4949;4950;4951;4952;4953;5866;5867	1639;1998;3337;4951;5866	58;59	32;63
SPAPB8E5.03	SPAPB8E5.03	2	2	2	>SPAPB8E5.03 |mae1||malic acid transport protein Mae1|Schizosaccharomyces pombe|chr 1|||Manual	1	2	2	2	4.6	4.6	4.6	49.304	438	438	1.2984e-05	NaN	NaN	NaN	1	21701000	10678000	11022000				417	850;2519	True;True	899;2748	1402;4190	2016;2017;6006	2016;6006
SPAPB8E5.07c	SPAPB8E5.07c	6	6	6	>SPAPB8E5.07c |||ribosome biogenesis protein Rrp12 |Schizosaccharomyces pombe|chr 1|||Manual	1	6	6	6	7.7	7.7	7.7	130.53	1163	1163	1.0061e-29	0.81626	0.99608	22.782	5	105450000	58323000	47122000				418	227;341;2864;2990;3088;3827	True;True;True;True;True;True	240;359;3115;3252;3361;4168	364;538;539;4695;4888;4889;5035;6204	515;776;777;6695;6696;6979;6980;7185;8896	515;776;6696;6980;7185;8896
SPAPB8E5.09	SPAPB8E5.09	7	7	7	>SPAPB8E5.09 |rvb1||AAA family ATPase Rvb1|Schizosaccharomyces pombe|chr 1|||Manual	1	7	7	7	23	23	23	50.052	456	456	1.014e-93	0.9695	1.1082	23.677	9	1098600000	542340000	556250000				419	174;1001;2485;3064;3554;3555;3832	True;True;True;True;True;True;True	184;1060;2712;3332;3873;3874;4174	294;1653;4138;4994;4995;5771;5772;5773;6213;6214	415;416;2364;2365;5934;7129;7130;7131;7132;8268;8269;8270;8271;8906;8907;8908	416;2364;5934;7132;8269;8271;8907
SPAPJ691.03	SPAPJ691.03	2	2	2	>SPAPJ691.03 |||mitochondrial conserved eukaryotic protein|Schizosaccharomyces pombe|chr 1|||Manual	1	2	2	2	25.6	25.6	25.6	9.3085	86	86	2.7418e-07	0.80423	0.91935	2.8733	2	43607000	19937000	23671000				420	31;3098	True;True	32;3372	57;5046	87;88;89;7200	87;7200
SPAPJ696.01c	SPAPJ696.01c	3	3	3	>SPAPJ696.01c |vps17||retromer complex subunit Vps17|Schizosaccharomyces pombe|chr 1|||Manual	1	3	3	3	6.9	6.9	6.9	60.92	549	549	1.2551e-21	0.56846	0.79488	21.535	3	56980000	40673000	16307000				421	1903;2599;3006	True;True;True	2034;2836;2837;3268	3055;4307;4308;4908	4379;6169;6170;7006	4379;6170;7006	157	447
SPAPJ698.02c	SPAPJ698.02c	4	4	3	>SPAPJ698.02c |rps002|rpsa-2, rps0-2, rps0|40S ribosomal protein S0B|Schizosaccharomyces pombe|chr 1|||Manual	1	4	4	3	23.7	23.7	19.5	31.42	287	287	1.2293e-79	0.7407	0.92931	71.636	4	687940000	299490000	388460000				422	57;803;1786;2765	True;True;True;True	60;849;1913;3014	94;1330;2900;4542	138;139;1918;1919;4157;6497;6498	138;1918;4157;6497
SPAPYUG7.03c	SPAPYUG7.03c	1	1	1	>SPAPYUG7.03c |mid2||medial ring protein Mid2|Schizosaccharomyces pombe|chr 1|||Manual	1	1	1	1	1.8	1.8	1.8	78.96	706	706	8.3802e-14	NaN	NaN	NaN	0	0	0	0				423	801	TRUE	847	1328	1915	1915
SPBC106.03	SPBC106.03	1	1	1	>SPBC106.03 |||DUF1776 family protein|Schizosaccharomyces pombe|chr 2|||Manual	1	1	1	1	3.9	3.9	3.9	40.006	357	357	0.00020401	NaN	NaN	NaN	1	26324000	16310000	10013000				424	1204	TRUE	1276	1966;1967	2834;2835	2834
SPBC106.04	SPBC106.04	1	1	1	>SPBC106.04 |ada1||adenosine deaminase Ada1 |Schizosaccharomyces pombe|chr 2|||Manual	1	1	1	1	1.4	1.4	1.4	95.886	831	831	0.00045295	NaN	NaN	NaN	1	38732000	13057000	25675000				425	2735	TRUE	2982	4506	6445	6445
SPBC106.06	SPBC106.06	9	9	9	>SPBC106.06 |cct4||chaperonin-containing T-complex delta subunit Cct4|Schizosaccharomyces pombe|chr 2|||Manual	1	9	9	9	29.8	29.8	29.8	56.968	527	527	7.4871e-85	0.91579	0.93088	16.156	11	920910000	470270000	450640000				426	85;405;591;917;1473;1557;1748;2139;3002	True;True;True;True;True;True;True;True;True	89;428;626;972;1568;1665;1873;2303;3264	175;630;631;1022;1524;1525;2372;2373;2537;2846;3469;4903	254;915;916;917;918;1474;2189;2190;2191;3410;3411;3412;3413;3646;3647;4088;4971;6998	254;915;1474;2191;3413;3647;4088;4971;6998	158	47
SPBC106.16	SPBC106.16	1	1	1	>SPBC106.16 |pre6||20S proteasome component alpha 4 Pre6|Schizosaccharomyces pombe|chr 2|||Manual	1	1	1	1	5.4	5.4	5.4	28.277	259	259	0.030673	NaN	NaN	NaN	0	0	0	0				427	1934	TRUE	2070	3099	4435	4435
SPBC106.18	SPBC106.18	5	5	2	>SPBC106.18 |rpl2501|rpl25a|60S ribosomal protein L25 |Schizosaccharomyces pombe|chr 2|||Manual	1	5	5	2	53.9	53.9	31.2	15.835	141	141	9.0842e-90	0.64826	0.64736	27.829	9	1039900000	593260000	446600000				428	1534;1699;1997;2108;3005	True;True;True;True;True	1635;1820;2136;2256;3267	2491;2492;2493;2775;2776;3191;3192;3354;4907	3582;3583;3584;3585;3586;3985;3986;4582;4583;4584;4585;4817;4818;7005	3584;3985;4583;4817;7005
SPBC1105.01	SPBC1105.01	1	1	1	>SPBC1105.01 |rrp12|SPBPB7E8.03|rRNA processing protein Rrp12-like |Schizosaccharomyces pombe|chr 2|||Manual	1	1	1	1	1.1	1.1	1.1	112.87	1001	1001	0.00014479	NaN	NaN	NaN	1	11621000	5556800	6064200				429	313	TRUE	330	499	723	723
SPBC1105.02c	SPBC1105.02c	6	6	6	>SPBC1105.02c |lys4||homocitrate synthase |Schizosaccharomyces pombe|chr 2|||Manual	1	6	6	6	19.4	19.4	19.4	46.292	418	418	1.1572e-74	1.0252	1.0811	13.295	7	1025300000	494000000	531320000				430	142;461;792;2240;2675;3548	True;True;True;True;True;True	148;149;488;838;2436;2919;3866	248;249;722;723;1316;3702;4424;5763	350;351;352;1052;1053;1054;1055;1895;1896;1897;5299;5300;6338;6339;8257	351;1055;1897;5299;6338;8257	159	342
SPBC1105.04c	SPBC1105.04c	2	2	2	>SPBC1105.04c |cbp1|abp1|CENP-B homolog|Schizosaccharomyces pombe|chr 2|||Manual	1	2	2	2	5	5	5	59.839	522	522	0.00029674	1.3167	1.6074	34.24	2	74486000	32913000	41573000				431	2738;3452	True;True	2985;3760	4510;5611	6449;6450;8042	6450;8042
SPBC1105.07c	SPBC1105.07c	1	1	1	>SPBC1105.07c |||nuclear pore associated protein Thp1-Sac3 complex subunit |Schizosaccharomyces pombe|chr 2|||Manual	1	1	1	1	3.6	3.6	3.6	50.836	442	442	1.777e-25	NaN	NaN	NaN	0	0	0	0				432	2857	TRUE	3107	4686	6683	6683
SPBC119.01	SPBC119.01	3	3	3	>SPBC119.01 |rpn3|SPBPJ4664.07|19S proteasome regulatory subunit Rpn3|Schizosaccharomyces pombe|chr 2|||Manual	1	3	3	3	10.7	10.7	10.7	57.346	497	497	1.9082e-24	0.81352	0.9958	57.184	3	114830000	64519000	50309000				433	150;2403;3305	True;True;True	157;2621;3601	261;262;4006;5389	371;372;5731;7689;7690	371;5731;7690	160	48
SPBC119.10	SPBC119.10	1	1	1	>SPBC119.10 |asn1||asparagine synthetase|Schizosaccharomyces pombe|chr 2|||Manual	1	1	1	1	3.2	3.2	3.2	63.24	557	557	7.992e-37	1.0839	1.3265	0.80776	2	138680000	55741000	82943000				434	1770	TRUE	1896	2874;2875;2876	4124;4125;4126;4127	4127
SPBC11B10.01	SPBC11B10.01	5	5	5	>SPBC11B10.01 |alg2|SPBC32H8.14|mannosyltransferase complex subunit Alg2 |Schizosaccharomyces pombe|chr 2|||Manual	1	5	5	5	13	13	13	57.166	506	506	1.0053e-20	0.86936	0.98666	15.945	5	126500000	67053000	59449000				435	797;1150;1457;1560;1656	True;True;True;True;True	843;1222;1552;1668;1771	1324;1886;2353;2542;2682	1911;2722;2723;3376;3652;3653;3858;3859	1911;2723;3376;3653;3859
SPBC11B10.10c	SPBC11B10.10c	1	1	1	>SPBC11B10.10c |pht1||histone H2A variant H2A.Z, Pht1|Schizosaccharomyces pombe|chr 2|||Manual	1	1	1	1	6.5	6.5	6.5	15.025	139	139	0.0030192	NaN	NaN	NaN	0	48042000	48042000	0				436	107	TRUE	111	204	291	291
SPBC11C11.07	SPBC11C11.07	5	2	2	>SPBC11C11.07 |rpl1801|rpl18-1, rpl18|60S ribosomal protein L18|Schizosaccharomyces pombe|chr 2|||Manual	1	5	2	2	29.9	23.5	23.5	21.19	187	187	6.6909e-75	0.68564	0.8825	13.122	3	475270000	260610000	214650000				437	94;96;520;1058;3294	False;True;False;False;True	98;100;549;1120;3589;3590	188;189;191;900;1736;5370;5371;5372	270;271;274;275;1298;1299;2496;7664;7665;7666;7667	270;274;1299;2496;7665	161	94
SPBC11G11.03	SPBC11G11.03	1	1	1	>SPBC11G11.03 |mrt4||mRNA turnover and ribosome assembly protein Mrt4 |Schizosaccharomyces pombe|chr 2|||Manual	1	1	1	1	8.7	8.7	8.7	26.663	241	241	6.3744e-07	NaN	NaN	NaN	1	48165000	27481000	20685000				438	111	TRUE	115	210	299	299
SPBC11G11.05	SPBC11G11.05	1	1	1	>SPBC11G11.05 |rpa34||DNA-directed RNA polymerase I complex subunit Rpa34 |Schizosaccharomyces pombe|chr 2|||Manual	1	1	1	1	9.6	9.6	9.6	28.01	251	251	2.5124e-26	NaN	NaN	NaN	1	103160000	41929000	61227000				439	2733	TRUE	2980	4504	6443	6443
SPBC1215.02c	SPBC1215.02c	5	5	5	>SPBC1215.02c |naa25|arm1, mdm20|NatB N-acetyltransferase complex regulatory subunit Naa25|Schizosaccharomyces pombe|chr 2|||Manual	1	5	5	5	8.4	8.4	8.4	92.456	811	811	1.7871e-29	0.78867	1.0116	19.634	3	80284000	44474000	35809000				440	2103;2104;2298;2301;3391	True;True;True;True;True	2251;2252;2497;2500;3695	3349;3350;3783;3787;5522	4812;4813;5413;5419;7913	4812;4813;5413;5419;7913	162	293
SPBC1271.02	SPBC1271.02	8	8	8	>SPBC1271.02 |stt3||oligosaccharyltransferase subunit Stt3|Schizosaccharomyces pombe|chr 2|||Manual	1	8	8	8	10.4	10.4	10.4	84.973	752	752	2.0669e-61	0.99054	1.1345	20.284	7	306530000	137660000	168880000				441	833;897;1523;1957;2188;2352;2551;3233	True;True;True;True;True;True;True;True	882;951;1623;2096;2375;2560;2783;3522	1371;1493;1494;2475;3140;3594;3870;4241;5266;5267	1973;2143;2144;3558;4504;4505;5151;5535;5536;6070;7506;7507	1973;2143;3558;4504;5151;5535;6070;7507
SPBC1271.14	SPBC1271.14	1	1	1	>SPBC1271.14 |||glutamate N-acetyltransferase |Schizosaccharomyces pombe|chr 2|||Manual	1	1	1	1	1.6	1.6	1.6	47.287	445	445	0.045351	NaN	NaN	NaN	1	2310800	730470	1580300				442	579	TRUE	611	999	1433	1433
SPBC1289.03c	SPBC1289.03c	2	2	2	>SPBC1289.03c |spi1||Ran GTPase Spi1|Schizosaccharomyces pombe|chr 2|||Manual	1	2	2	2	11.6	11.6	11.6	24.555	216	216	3.1634e-19	0.52744	0.64512	14.321	3	342440000	203240000	139200000				443	2388;2918	True;True	2602;3171	3972;4774;4775	5690;6811;6812;6813;6814;6815;6816	5690;6812
SPBC1289.07c	SPBC1289.07c	3	3	3	>SPBC1289.07c |rpc40|rpa42|DNA-directed RNA polymerase I and III subunit Rpc40|Schizosaccharomyces pombe|chr 2|||Manual	1	3	3	3	17.2	17.2	17.2	39.154	348	348	9.8986e-29	0.90773	1.0412	10.103	3	246210000	130940000	115270000				444	1889;1990;2109	True;True;True	2018;2129;2257	3034;3183;3355	4349;4350;4571;4572;4819	4349;4572;4819
SPBC12C2.11	SPBC12C2.11	3	3	3	>SPBC12C2.11 ||SPBC21D10.02|glutamine-fructose-6-phosphate transaminase |Schizosaccharomyces pombe|chr 2|||Manual	1	3	3	3	6.8	6.8	6.8	77.321	696	696	1.1757e-24	0.90552	1.0689	23.151	2	68199000	34671000	33528000				445	714;2064;2086	True;True;True	757;2209;2232	1201;3278;3316	1728;1729;4713;4762	1728;4713;4762
SPBC12D12.03	SPBC12D12.03	3	3	3	>SPBC12D12.03 |cct1||chaperonin-containing T-complex alpha subunit Cct1|Schizosaccharomyces pombe|chr 2|||Manual	1	3	3	3	10.3	10.3	10.3	60.046	556	556	1.9904e-19	0.88319	1.077	18.762	2	173870000	86081000	87790000				446	762;2401;3648	True;True;True	807;2619;3977	1275;4004;5933	1828;5729;8498	1828;5729;8498
SPBC1347.02	SPBC1347.02	1	1	1	>SPBC1347.02 |fkbp39||FKBP-type peptidyl-prolyl cis-trans isomerase |Schizosaccharomyces pombe|chr 2|||Manual	1	1	1	1	3.3	3.3	3.3	39.301	361	361	0.00037722	NaN	NaN	NaN	1	30366000	14080000	16286000				447	2861	TRUE	3111	4690	6687	6687
SPBC1347.06c	SPBC1347.06c	1	1	1	>SPBC1347.06c |cki1||serine/threonine protein kinase Cki1|Schizosaccharomyces pombe|chr 2|||Manual	1	1	1	1	2.7	2.7	2.7	50.424	446	446	0.018117	NaN	NaN	NaN	0	0	0	0				448	562	TRUE	593	970	1396	1396
SPBC13A2.03	SPBC13A2.03	2	2	2	>SPBC13A2.03 |||phosphatidate cytidylyltransferase |Schizosaccharomyces pombe|chr 2|||Manual	1	2	2	2	3	3	3	49.936	439	439	6.4788e-06	1.0777	1.2013	8.6314	4	26463000	13965000	12498000				449	1113;2129	True;True	1184;2286;2287	1838;3444;3445;3446	2656;4938;4939;4940	2656;4938	163	228
SPBC13G1.02	SPBC13G1.02	2	2	2	>SPBC13G1.02 |||mannose-1-phosphate guanyltransferase |Schizosaccharomyces pombe|chr 2|||Manual	1	2	2	2	6.3	6.3	6.3	46.096	414	414	7.9328e-15	0.6431	0.82487	29.088	3	173910000	98249000	75666000				450	168;779	True;True	177;825	284;1299;1300	404;1866;1867;1868;1869	404;1868
SPBC146.13c	SPBC146.13c	1	1	1	>SPBC146.13c |myo1||myosin type I|Schizosaccharomyces pombe|chr 2|||Manual	1	1	1	1	1.7	1.7	1.7	135.71	1217	1217	2.2714e-08	NaN	NaN	NaN	0	0	0	0				451	2358	TRUE	2569	3886	5564	5564
SPBC146.14c	SPBC146.14c	13	13	13	>SPBC146.14c |sec26|SPBC337.01c|coatomer beta subunit |Schizosaccharomyces pombe|chr 2|||Manual	1	13	13	13	23.4	23.4	23.4	104.7	940	940	1.882e-184	0.75824	0.88068	24.529	16	683550000	346030000	337530000				452	139;152;272;1613;1797;1818;1878;2211;2383;2663;3081;3517;3642	True;True;True;True;True;True;True;True;True;True;True;True;True	145;159;287;1726;1925;1946;2007;2405;2596;2904;3353;3833;3970	244;264;430;2620;2913;2944;2945;2946;3019;3020;3640;3964;3965;3966;4399;5022;5023;5726;5924;5925	343;344;374;613;614;3762;3763;3764;3765;4175;4231;4232;4233;4234;4330;4331;4332;5217;5678;5679;5680;6299;7168;7169;7170;8204;8483;8484	344;374;614;3764;4175;4232;4331;5217;5680;6299;7169;8204;8483
SPBC14C8.02	SPBC14C8.02	4	4	4	>SPBC14C8.02 |tim44||TIM23 translocase complex subunit Tim44 |Schizosaccharomyces pombe|chr 2|||Manual	1	4	4	4	14.5	14.5	14.5	48.549	427	427	3.9669e-28	0.84615	1.0331	23.979	3	77414000	39122000	38292000				453	629;1897;2282;3320	True;True;True;True	667;2026;2481;3618	1081;3044;3045;3761;5414	1551;4365;4366;4367;4368;5383;7726	1551;4367;5383;7726
SPBC14C8.12	SPBC14C8.12	1	1	1	>SPBC14C8.12 |rpb8||DNA-directed RNA polymerase I, II and III subunit Rpb8|Schizosaccharomyces pombe|chr 2|||Manual	1	1	1	1	9.6	9.6	9.6	14.3	125	125	3.2429e-07	NaN	NaN	NaN	1	38893000	20117000	18776000				454	2009	TRUE	2151	3207	4605	4605
SPBC14C8.14c	SPBC14C8.14c	3	3	3	>SPBC14C8.14c |pol5||DNA polymerase phi|Schizosaccharomyces pombe|chr 2|||Manual	1	3	3	3	4.4	4.4	4.4	109.72	959	959	6.3493e-26	0.81815	0.99901	16.243	3	110640000	51768000	58875000				455	1220;2508;2554	True;True;True	1294;2737;2786	1987;1988;4177;4244	2858;2859;5984;5985;5986;6073	2859;5985;6073
SPBC14C8.17c	SPBC14C8.17c	3	3	3	>SPBC14C8.17c |spt8|sep9|SAGA complex subunit Spt8|Schizosaccharomyces pombe|chr 2|||Manual	1	3	3	3	11	11	11	58.418	526	526	4.0417e-64	1.8419	2.2493	12.053	5	1440300000	456700000	983600000				456	100;1099;3697	True;True;True	104;1164;4029	195;196;1807;1808;6007;6008	280;281;282;2606;2607;8601;8602	281;2607;8602
SPBC14F5.03c	SPBC14F5.03c	4	4	4	>SPBC14F5.03c |kap123||karyopherin Kap123|Schizosaccharomyces pombe|chr 2|||Manual	1	4	4	4	6.5	6.5	6.5	117.83	1067	1067	3.2481e-51	0.69642	0.78884	10.945	5	216750000	124480000	92273000				457	194;1974;2909;3623	True;True;True;True	205;2113;3161;3951	321;322;3163;4759;5901	455;456;457;4535;4536;6793;8453;8454;8455	455;4535;6793;8455
SPBC14F5.04c	SPBC14F5.04c	14	14	14	>SPBC14F5.04c |pgk1||phosphoglycerate kinase Pgk1 |Schizosaccharomyces pombe|chr 2|||Manual	1	14	14	14	41.8	41.8	41.8	43.963	414	414	2.1856e-123	0.78356	0.94483	21.306	15	1980000000	1020000000	959960000				458	191;638;1455;1603;1624;1664;2344;2345;2880;3166;3341;3342;3719;3821	True;True;True;True;True;True;True;True;True;True;True;True;True;True	202;676;1550;1715;1737;1779;2552;2553;3131;3444;3639;3640;4054;4162	317;318;1092;1093;2351;2607;2633;2691;2692;3861;3862;4712;4713;5147;5449;5450;6043;6197	445;446;447;448;1567;1568;3374;3741;3781;3782;3873;3874;3875;5521;5522;6720;6721;6722;6723;6724;7338;7339;7340;7792;7793;7794;8660;8885	446;1567;3374;3741;3782;3874;5521;5522;6720;7339;7792;7794;8660;8885
SPBC14F5.05c	SPBC14F5.05c	5	5	5	>SPBC14F5.05c |sam1||S-adenosylmethionine synthetase|Schizosaccharomyces pombe|chr 2|||Manual	1	5	5	5	32.5	32.5	32.5	41.831	382	382	3.0688e-101	0.61346	0.77661	40.474	7	1877900000	1041700000	836110000				459	184;1264;1976;2624;3121	True;True;True;True;True	195;1343;2115;2862;3398	307;2060;2061;2062;3166;4340;5089	434;2962;2963;2964;2965;2966;2967;2968;2969;4542;4543;4544;6214;7261	434;2969;4542;6214;7261	164	125
SPBC14F5.09c	SPBC14F5.09c	2	2	2	>SPBC14F5.09c |ade8||adenylosuccinate lyase Ade8|Schizosaccharomyces pombe|chr 2|||Manual	1	2	2	2	7.1	7.1	7.1	54.307	482	482	5.0535e-10	0.7111	0.79187	27.876	2	49975000	27872000	22102000				460	1533;2853	True;True	1634;3103	2490;4682	3581;6678	3581;6678
SPBC14F5.12c	SPBC14F5.12c	1	1	1	>SPBC14F5.12c |cbh2||CENP-B homolog Cbh2|Schizosaccharomyces pombe|chr 2|||Manual	1	1	1	1	2.1	2.1	2.1	59.69	514	514	1.0956e-05	NaN	NaN	NaN	1	25060000	5484100	19576000				461	1170	TRUE	1242	1911	2759	2759
SPBC14F5.13c	SPBC14F5.13c	2	2	2	>SPBC14F5.13c |||vacuolar membrane alkaline phosphatase |Schizosaccharomyces pombe|chr 2|||Manual	1	2	2	2	5.1	5.1	5.1	58.666	532	532	2.8547e-13	NaN	NaN	NaN	1	25611000	12144000	13467000				462	2676;3008	True;True	2920;3270	4425;4910	6340;7009	6340;7009
SPBC1539.03c	SPBC1539.03c	3	3	3	>SPBC1539.03c |||argininosuccinate lyase |Schizosaccharomyces pombe|chr 2|||Manual	1	3	3	3	13.7	13.7	13.7	51.571	460	460	1.12e-64	0.77517	0.92209	20.602	3	247560000	123130000	124420000				463	798;2876;3303	True;True;True	844;3127;3599	1325;4707;5387	1912;6711;7686;7687	1912;6711;7686	165	368
SPBC1539.04	SPBC1539.04	6	6	6	>SPBC1539.04 |tts1||tetra spanning protein 1, Tts1|Schizosaccharomyces pombe|chr 2|||Manual	1	6	6	6	29	29	29	31.57	279	279	5.9935e-18	0.84986	1.0377	18.781	6	149560000	80205000	69353000				464	284;680;2056;2065;3019;3602	True;True;True;True;True;True	299;720;2201;2210;3284;3929	444;1147;3267;3279;4932;5861	634;1645;1646;4697;4714;4715;7041;8403;8404	634;1646;4697;4715;7041;8403
SPBC1539.05	SPBC1539.05	1	1	1	>SPBC1539.05 |cog3||Golgi transport complex subunit Cog3 |Schizosaccharomyces pombe|chr 2|||Manual	1	1	1	1	2	2	2	85.998	735	735	0.040851	NaN	NaN	NaN	1	24184000	12731000	11453000				465	1908	TRUE	2039	3061	4387	4387
SPBC1539.09c	SPBC1539.09c	1	1	1	>SPBC1539.09c |trp1||anthranilate synthase component II |Schizosaccharomyces pombe|chr 2|||Manual	1	1	1	1	1.7	1.7	1.7	83.039	759	759	1.6959e-06	NaN	NaN	NaN	1	16967000	9025400	7941500				466	3687	TRUE	4019	5996	8589	8589
SPBC15D4.01c	SPBC15D4.01c	1	1	1	>SPBC15D4.01c |klp9|SPBC2D10.21c|kinesin-like protein Klp9|Schizosaccharomyces pombe|chr 2|||Manual	1	1	1	1	2.2	2.2	2.2	71.451	633	633	0.0023966	NaN	NaN	NaN	1	16042000	6932900	9109100				467	2854	TRUE	3104	4683	6679	6679
SPBC1604.05	SPBC1604.05	7	7	7	>SPBC1604.05 |pgi1||glucose-6-phosphate isomerase |Schizosaccharomyces pombe|chr 2|||Manual	1	7	7	7	25.5	25.5	25.5	60.883	550	550	5.2813e-120	0.88065	0.87901	27.767	9	519170000	266070000	253100000				468	354;518;1342;1801;2150;2385;3115	True;True;True;True;True;True;True	372;547;1431;1929;2316;2598;3392	556;898;2196;2919;2920;3487;3488;3489;3490;3491;3968;5080	800;1295;1296;3151;3152;4186;4187;4188;4189;4996;4997;4998;4999;5000;5683;5684;7248;7249	800;1295;3151;4186;4997;5684;7249
SPBC1604.14c	SPBC1604.14c	2	2	2	>SPBC1604.14c |shk1|pak1, orb2|PAK-related kinase Shk1|Schizosaccharomyces pombe|chr 2|||Manual	1	2	2	2	4.6	4.6	4.6	72.357	658	658	5.2554e-14	0.83764	1.0201	60.815	3	88661000	47385000	41276000				469	1423;2434	True;True	1516;2657	2308;2309;4064	3309;3310;5833	3309;5833
SPBC1677.03c	SPBC1677.03c	5	5	5	>SPBC1677.03c |||mitochondrial threonine ammonia-lyase |Schizosaccharomyces pombe|chr 2|||Manual	1	5	5	5	11.7	11.7	11.7	66.543	600	600	8.84e-29	0.90885	0.92483	42.69	5	293830000	146610000	147220000				470	1740;2218;2258;2594;2778	True;True;True;True;True	1865;2413;2457;2831;3028	2832;3652;3732;4301;4302;4556	4071;4072;5232;5342;6163;6164;6516;6517	4071;5232;5342;6163;6516
SPBC1683.03c	SPBC1683.03c	1	1	1	>SPBC1683.03c |||membrane transporter |Schizosaccharomyces pombe|chr 2|||Manual	1	1	1	1	3.9	3.9	3.9	56.954	519	519	0.0114	NaN	NaN	NaN	1	26529000	10047000	16483000				471	224	TRUE	237	360	509	509
SPBC1683.04	SPBC1683.04	1	1	1	>SPBC1683.04 |||glycosyl hydrolase family 3 |Schizosaccharomyces pombe|chr 2|||Manual	1	1	1	1	1	1	1	93.168	832	832	0.010139	NaN	NaN	NaN	0	0	0	0				472	1308	TRUE	1392	2151	3091	3091
SPBC1685.09	SPBC1685.09	7	7	7	>SPBC1685.09 |rps29||40S ribosomal protein S29 |Schizosaccharomyces pombe|chr 2|||Manual	1	7	7	7	64.3	64.3	64.3	6.6575	56	56	2.6561e-72	0.97178	1.1941	30.091	10	1273600000	591250000	682310000				473	120;121;627;1625;2521;2522;3741	True;True;True;True;True;True;True	125;126;665;1738;2750;2751;4076	222;223;224;1078;1079;2634;4192;4193;4194;6071;6072	313;314;315;316;317;318;1547;1548;3783;3784;6009;6010;6011;6012;8701;8702	314;318;1547;3784;6009;6012;8702
SPBC1685.10	SPBC1685.10	9	9	9	>SPBC1685.10 |rps27||40S ribosomal protein S27 |Schizosaccharomyces pombe|chr 2|||Manual	1	9	9	9	55.4	55.4	55.4	9.1718	83	83	5.1836e-45	0.69867	0.85896	17.771	17	1866800000	992320000	874450000				474	270;1829;1923;1924;2497;2702;3481;3482;3483	True;True;True;True;True;True;True;True;True	285;1957;2054;2055;2056;2057;2725;2946;2947;3791;3792;3793;3794;3795;3796	426;2963;3081;3082;3083;3084;4158;4458;4459;5675;5676;5677;5678;5679;5680;5681;5682	607;4262;4413;4414;4415;4416;4417;4418;5958;5959;6381;6382;6383;6384;6385;8134;8135;8136;8137;8138;8139;8140;8141;8142;8143;8144;8145;8146;8147;8148	607;4262;4415;4418;5959;6385;8137;8140;8148	166;167;168	16;33;74
SPBC1685.13	SPBC1685.13	3	3	3	>SPBC1685.13 |fhn1||Fhn1 plasma membrane organization protein|Schizosaccharomyces pombe|chr 2|||Manual	1	3	3	3	18.6	18.6	18.6	20.273	183	183	2.0582e-10	1.4118	1.7252	9.153	3	50603000	16484000	34119000				475	990;2223;2558	True;True;True	1048;2418;2790	1633;3659;4249	2337;2338;5243;5244;5245;6081	2338;5244;6081	169	180
SPBC16A3.08c	SPBC16A3.08c	2	2	2	>SPBC16A3.08c |||Stm1 homolog |Schizosaccharomyces pombe|chr 2|||Manual	1	2	2	2	12.3	12.3	12.3	30.949	284	284	3.4385e-17	0.9502	1.0751	50.222	2	281870000	128450000	153420000				476	1612;2294	True;True	1725;2493	2619;3777;3778	3761;5405;5406	3761;5406
SPBC16A3.15c	SPBC16A3.15c	7	7	3	>SPBC16A3.15c |nda2||tubulin alpha 1|Schizosaccharomyces pombe|chr 2|||Manual	1	7	7	3	25.7	25.7	12.7	51.152	455	455	2.5752e-72	0.72095	0.88361	43.158	10	820700000	445880000	374820000				477	311;890;1239;1773;2805;3124;3161	True;True;True;True;True;True;True	328;941;1315;1900;3055;3401;3402;3439	497;1477;2021;2022;2023;2882;2883;4596;4597;5092;5093;5142	721;2115;2116;2906;2907;2908;2909;4137;4138;6569;6570;6571;7265;7266;7332	721;2115;2906;4137;6569;7266;7332	170	96
SPBC16C6.07c	SPBC16C6.07c	5	5	5	>SPBC16C6.07c |rpt1||19S proteasome regulatory subunit Rpt1 |Schizosaccharomyces pombe|chr 2|||Manual	1	5	5	5	18.7	18.7	18.7	48.965	438	438	1.6697e-36	0.5782	0.79335	32.372	4	381150000	214440000	166710000				478	603;1987;2895;3224;3498	True;True;True;True;True	639;2126;3146;3509;3812;3813	1043;3180;4736;5250;5700;5701	1505;4566;4567;6757;6758;7487;8169;8170	1505;4566;6757;7487;8169	171	336
SPBC16C6.09	SPBC16C6.09	1	1	1	>SPBC16C6.09 |ogm4|oma4|protein O-mannosyltransferase Ogm4|Schizosaccharomyces pombe|chr 2|||Manual	1	1	1	1	1.4	1.4	1.4	90.09	778	778	0.0022149	NaN	NaN	NaN	0	0	0	0				479	2928	TRUE	3183	4800	6861	6861
SPBC16C6.11;SPAC3H5.10	SPBC16C6.11	5;2	5;2	5;2	>SPBC16C6.11 |rpl3201|rpl32-1|60S ribosomal protein L32|Schizosaccharomyces pombe|chr 2|||Manual	2	5	5	5	39.4	39.4	39.4	14.445	127	127;127	8.7076e-43	0.86124	0.93166	13.908	6	516280000	264850000	251430000				480	8;776;1115;2391;2392	True;True;True;True;True	8;822;1186;2605;2606;2607;2608	10;11;1295;1840;3987;3988;3989;3990;3991	11;12;1860;2658;5705;5706;5707;5708;5709;5710	12;1860;2658;5706;5707	172	84
SPBC16C6.12c	SPBC16C6.12c	1	1	1	>SPBC16C6.12c |||Las1-like protein|Schizosaccharomyces pombe|chr 2|||Manual	1	1	1	1	2.6	2.6	2.6	54.306	470	470	0.00010021	NaN	NaN	NaN	0	0	0	0				481	2754	TRUE	3003	4530	6481	6481
SPBC16C6.13c	SPBC16C6.13c	5	5	5	>SPBC16C6.13c |sec27||coatomer beta subunit |Schizosaccharomyces pombe|chr 2|||Manual	1	5	5	5	10.3	10.3	10.3	89.802	796	796	1.3165e-23	0.84421	0.99933	31.768	4	175460000	87949000	87509000				482	231;569;1701;3622;3661	True;True;True;True;True	244;600;1822;3950;3991	368;982;2778;5899;5900;5952	520;521;1412;3988;8450;8451;8452;8526	521;1412;3988;8451;8526
SPBC16D10.03	SPBC16D10.03	1	1	1	>SPBC16D10.03 |pgp2||metallopeptidase Pgp2|Schizosaccharomyces pombe|chr 2|||Manual	1	1	1	1	2.3	2.3	2.3	37.515	346	346	0.0010889	NaN	NaN	NaN	1	31207000	19513000	11694000				483	339	TRUE	357	536	773;774	774
SPBC16D10.06	SPBC16D10.06	1	1	1	>SPBC16D10.06 |zrt1||ZIP zinc transporter Zrt1|Schizosaccharomyces pombe|chr 2|||Manual	1	1	1	1	3.9	3.9	3.9	45.271	408	408	0.00053877	0.26417	0.30175	16.263	3	33108000	26059000	7049400				484	689	TRUE	729;730	1158;1159;1160	1662;1663;1664	1662	173	170
SPBC16D10.11c;SPCC1259.01c	SPBC16D10.11c;SPCC1259.01c	5;5	5;5	5;5	>SPBC16D10.11c |rps1801|rps18-1|40S ribosomal protein S18 |Schizosaccharomyces pombe|chr 2|||Manual;>SPCC1259.01c |rps1802|rps18-2, SPCC825.06c|40S ribosomal protein S18 |Schizosaccharomyces pombe|chr 3|||Manual	2	5	5	5	36.8	36.8	36.8	17.435	152	152;152	3.6955e-96	0.69141	0.83985	20.565	7	222650000	123650000	99002000				485	91;1475;1883;2565;2889	True;True;True;True;True	95;1570;2012;2798;3140	184;185;2375;3026;4259;4726;4727;4728	265;266;3415;4340;6097;6098;6745;6746;6747	265;3415;4340;6098;6746
SPBC16E9.10c	SPBC16E9.10c	1	1	1	>SPBC16E9.10c |||AAA family ATPase Rix7 |Schizosaccharomyces pombe|chr 2|||Manual	1	1	1	1	1.9	1.9	1.9	86.178	779	779	1.9642e-13	NaN	NaN	NaN	1	35935000	22192000	13744000				486	3646	TRUE	3975	5930	8491;8492;8493;8494	8493
SPBC16E9.11c	SPBC16E9.11c	7	7	7	>SPBC16E9.11c |pub3||HECT-type ubiquitin-protein ligase Pub3 |Schizosaccharomyces pombe|chr 2|||Manual	1	7	7	7	11.7	11.7	11.7	89.259	786	786	3.5538e-28	0.99345	1.1862	18.519	10	404680000	198750000	205930000				487	469;523;1511;2511;2968;3023;3578	True;True;True;True;True;True;True	496;553;1609;2740;3228;3288;3899	734;907;908;909;2448;2449;2450;4181;4859;4936;5805	1073;1074;1308;1309;1310;1311;3516;3517;3518;3519;5993;6936;7047;8316	1073;1311;3517;5993;6936;7047;8316
SPBC16G5.05c	SPBC16G5.05c	1	1	1	>SPBC16G5.05c |||VAP family protein |Schizosaccharomyces pombe|chr 2|||Manual	1	1	1	1	4.2	4.2	4.2	41.234	383	383	1.8351e-06	NaN	NaN	NaN	1	37502000	19246000	18256000				488	573	TRUE	604	986;987	1416;1417	1417
SPBC16G5.14c	SPBC16G5.14c	4	4	4	>SPBC16G5.14c |rps3||40S ribosomal protein S3 |Schizosaccharomyces pombe|chr 2|||Manual	1	4	4	4	20.5	20.5	20.5	27.553	249	249	3.6671e-75	0.70385	0.90436	23.758	4	493120000	234600000	258520000				489	636;717;718;3621	True;True;True;True	674;760;761;3949	1090;1204;1205;5898	1561;1562;1563;1732;1733;1734;1735;8448;8449	1562;1732;1735;8448
SPBC16G5.18	SPBC16G5.18	1	1	1	>SPBC16G5.18 |erg24||C-14 sterol reductase Erg24 |Schizosaccharomyces pombe|chr 2|||Manual	1	1	1	1	3.1	3.1	3.1	48.56	424	424	0.00070879	NaN	NaN	NaN	1	17555000	9511300	8044100				490	3774	TRUE	4112	6121	8769	8769
SPBC16H5.02	SPBC16H5.02	31	31	31	>SPBC16H5.02 |pfk1||6-phosphofructokinase |Schizosaccharomyces pombe|chr 2|||Manual	1	31	31	31	41.9	41.9	41.9	102.55	942	942	0	0.73327	0.87504	28.584	53	9395800000	5043600000	4352200000				491	73;426;459;460;483;777;876;884;1037;1173;1577;1597;2039;2040;2076;2077;2217;2440;2491;2681;2682;2683;2684;2801;2802;2961;3069;3350;3370;3680;3681	True;True;True;True;True;True;True;True;True;True;True;True;True;True;True;True;True;True;True;True;True;True;True;True;True;True;True;True;True;True;True	77;450;485;486;487;510;823;926;935;1097;1245;1687;1709;2184;2185;2221;2222;2411;2412;2663;2664;2719;2925;2926;2927;2928;3051;3052;3221;3337;3650;3651;3672;4012;4013	161;669;717;718;719;720;721;750;1296;1297;1448;1449;1467;1468;1703;1704;1916;2570;2596;3247;3248;3298;3299;3648;3649;3650;3651;4073;4074;4075;4076;4077;4078;4151;4152;4431;4432;4433;4434;4435;4436;4587;4588;4589;4590;4591;4592;4593;4849;5001;5462;5463;5489;5490;5984;5985;5986;5987;5988;5989	230;970;1043;1044;1045;1046;1047;1048;1049;1050;1051;1096;1097;1861;1862;1863;1864;2073;2074;2099;2100;2101;2102;2444;2445;2446;2447;2768;3688;3727;4666;4667;4668;4669;4740;4741;4742;5226;5227;5228;5229;5230;5231;5845;5846;5847;5848;5849;5850;5851;5852;5853;5950;5951;6348;6349;6350;6351;6352;6353;6354;6355;6557;6558;6559;6560;6561;6562;6563;6564;6565;6923;7141;7142;7143;7813;7814;7815;7855;7856;7…	230;970;1047;1050;1097;1862;2074;2101;2446;2768;3688;3727;4666;4669;4740;4741;5228;5850;5951;6351;6352;6353;6355;6558;6565;6923;7143;7815;7859;8574;8579	174;175;176;177	60;551;598;928
SPBC16H5.08c	SPBC16H5.08c	3	3	3	>SPBC16H5.08c |||ribosome biogenesis ATPase, Arb family ABCF2-like |Schizosaccharomyces pombe|chr 2|||Manual	1	3	3	3	11.8	11.8	11.8	69.212	618	618	1.6079e-57	0.62335	0.72248	59.826	7	673650000	357940000	315710000				492	17;2984;3637	True;True;True	17;18;3245;3965	36;37;38;39;4879;4880;5919	52;53;54;55;56;6966;6967;6968;6969;8476;8477;8478	52;6968;8478	178;179	202;214
SPBC16H5.10c	SPBC16H5.10c	8	8	8	>SPBC16H5.10c |prp43||ATP-dependent RNA helicase Prp43 |Schizosaccharomyces pombe|chr 2|||Manual	1	8	8	8	11.7	11.7	11.7	83.803	735	735	5.401e-51	1.045	1.1888	26.384	9	331410000	143520000	187900000				493	229;230;1396;1507;2723;3182;3183;3727	True;True;True;True;True;True;True;True	242;243;1488;1605;2969;3460;3461;3462;3463;4062	366;367;2271;2272;2444;4489;5172;5173;5174;5175;6051	517;518;519;3255;3256;3257;3258;3512;6427;7375;7376;7377;7378;7379;7380;7381;8673	517;519;3257;3512;6427;7375;7379;8673	180	210
SPBC16H5.12c	SPBC16H5.12c	1	1	1	>SPBC16H5.12c ||SPNGAF91|conserved fungal protein|Schizosaccharomyces pombe|chr 2|||Manual	1	1	1	1	1.6	1.6	1.6	82.52	737	737	1.4615e-06	NaN	NaN	NaN	1	37795000	21291000	16505000				494	1860	TRUE	1989	2999	4307	4307
SPBC1703.07	SPBC1703.07	7	7	7	>SPBC1703.07 |||ATP citrate synthase subunit 1 |Schizosaccharomyces pombe|chr 2|||Manual	1	7	7	7	14.5	14.5	14.5	67.203	615	615	4.2508e-74	1.0652	1.2607	23.126	7	267170000	125280000	141890000				495	101;444;1847;1848;2766;3140;3310	True;True;True;True;True;True;True	105;468;1976;1977;3015;3418;3607	197;198;695;696;2985;2986;4543;5118;5399;5400	283;284;285;1006;1007;1008;4291;4292;6499;7299;7706;7707	283;1007;4291;4292;6499;7299;7706
SPBC1703.13c	SPBC1703.13c	7	7	7	>SPBC1703.13c |||mitochondrial inorganic phosphate transporter |Schizosaccharomyces pombe|chr 2|||Manual	1	7	7	7	28.3	28.3	28.3	33.843	311	311	1.5973e-50	0.69891	0.79429	37.712	4	366910000	210880000	156030000				496	928;955;1448;1476;2547;2991;3736	True;True;True;True;True;True;True	983;1011;1543;1571;2778;3253;4071	1539;1573;2341;2376;4229;4890;6062	2211;2212;2258;3357;3416;6057;6981;8687;8688	2212;2258;3357;3416;6057;6981;8687
SPBC1703.14c	SPBC1703.14c	2	2	2	>SPBC1703.14c |top1||DNA topoisomerase I|Schizosaccharomyces pombe|chr 2|||Manual	1	2	2	2	3.2	3.2	3.2	93.979	814	814	1.6964e-12	1.5317	1.8577	0.6535	2	109900000	37950000	71953000				497	2317;3317	True;True	2517;3615	3806;5411	5444;7722;7723	5444;7723
SPBC1709.02c	SPBC1709.02c	2	2	2	>SPBC1709.02c |vrs1|vas1, SPBC1734.18c, ValRS1|cytoplasmic valine-tRNA ligase Vrs1/Vas1|Schizosaccharomyces pombe|chr 2|||Manual	1	2	2	2	3.1	3.1	3.1	111.32	980	980	1.7404e-26	0.59343	0.70131	61.87	2	40049000	26288000	13761000				498	315;3053	True;True	332;3320	502;4977	726;7103	726;7103
SPBC1709.05	SPBC1709.05	22	22	22	>SPBC1709.05 |sks2|hsc1|heat shock protein, ribosome associated molecular chaperone Sks2|Schizosaccharomyces pombe|chr 2|||Manual	1	22	22	22	57.1	57.1	57.1	67.205	613	613	0	1.2628	1.2456	39.306	37	14275000000	5730700000	8544000000				499	223;266;975;1195;1266;1267;1378;1379;1592;2377;2386;2444;2648;2782;2783;2813;2934;3114;3289;3440;3441;3537	True;True;True;True;True;True;True;True;True;True;True;True;True;True;True;True;True;True;True;True;True;True	236;281;1032;1267;1345;1346;1470;1471;1703;1704;2589;2599;2668;2669;2888;3032;3033;3063;3189;3190;3191;3391;3584;3745;3746;3854	359;419;1601;1602;1603;1604;1605;1952;2065;2066;2067;2068;2244;2245;2246;2589;2590;2591;3918;3969;4082;4083;4084;4376;4560;4561;4562;4611;4612;4806;4807;4808;4809;4810;5078;5079;5362;5363;5590;5591;5592;5748;5749	508;595;2299;2300;2301;2302;2303;2815;2973;2974;2975;2976;2977;2978;2979;2980;3217;3218;3219;3220;3221;3715;3716;3717;3718;3719;3720;5616;5685;5858;5859;5860;5861;6268;6521;6522;6523;6524;6525;6588;6589;6590;6869;6870;6871;6872;6873;6874;6875;6876;6877;6878;7244;7245;7246;7247;7651;7652;7653;7654;8009;8010;8011;8012;8013;8014;8015;8235;8236;8237;8238	508;595;2299;2815;2976;2978;3218;3219;3715;5616;5685;5858;6268;6524;6525;6590;6872;7247;7654;8009;8013;8238	181;182;183	124;562;563
SPBC1711.05	SPBC1711.05	4	4	4	>SPBC1711.05 |||nucleocytoplasmic transport chaperone Srp40 |Schizosaccharomyces pombe|chr 2|||Manual	1	4	4	4	8.9	8.9	8.9	47.427	451	451	3.7426e-38	1.4082	1.4024	18.393	5	434660000	175300000	259350000				500	2302;2303;2815;3372	True;True;True;True	2501;2502;3065;3674	3788;3789;4615;4616;5493	5420;5421;5422;5423;6594;6595;6596;6597;7864	5420;5423;6596;7864
SPBC1711.06	SPBC1711.06	10	10	5	>SPBC1711.06 |rpl401|rpl4-1, rpl4|60S ribosomal protein L4 |Schizosaccharomyces pombe|chr 2|||Manual	1	10	10	5	37.7	37.7	22.9	39.91	363	363	7.5492e-161	0.68781	0.81123	21.355	19	3611200000	1936300000	1674900000				501	3;420;883;1197;1936;2400;2578;2603;2646;3714	True;True;True;True;True;True;True;True;True;True	3;444;934;1269;2072;2618;2812;2841;2886;4049	5;660;661;662;1464;1465;1466;1954;1955;3101;3102;4003;4279;4280;4312;4313;4314;4374;6035;6036	6;957;958;959;960;2096;2097;2098;2818;2819;4437;4438;4439;4440;4441;4442;5727;5728;6130;6131;6174;6175;6176;6177;6178;6179;6263;6264;6265;8643;8644;8645;8646	6;957;2098;2818;4440;5728;6131;6177;6265;8646
SPBC1711.16	SPBC1711.16	1	1	1	>SPBC1711.16 |||WD repeat protein |Schizosaccharomyces pombe|chr 2|||Manual	1	1	1	1	2.1	2.1	2.1	57.336	516	516	0.00015161	NaN	NaN	NaN	1	26572000	14266000	12306000				502	2804	TRUE	3054	4595	6568	6568
SPBC1734.03	SPBC1734.03	1	1	1	>SPBC1734.03 ||SPBC337.19|dihydropteroatesynthase/2-amino-4-hydroxy-6-hydroxymethyldihydropteridinediphosphokinase/dihydroneopterin aldolase |Schizosaccharomyces pombe|chr 2|||Manual	1	1	1	1	1.2	1.2	1.2	81.925	733	733	0.041875	NaN	NaN	NaN	0	0	0	0				503	3462	TRUE	3771	5644	8085	8085
SPBC1734.11	SPBC1734.11	3	3	3	>SPBC1734.11 |mas5||DNAJ domain protein Mas5 |Schizosaccharomyces pombe|chr 2|||Manual	1	3	3	3	16.7	16.7	16.7	44.821	407	407	1.6133e-56	0.73567	0.80379	16.25	6	1207900000	571230000	636710000				504	701;1453;2099	True;True;True	744;1548;2246	1184;1185;2347;2348;2349;3337	1702;1703;1704;1705;1706;3367;3368;3369;3370;3371;3372;4797;4798	1706;3371;4798
SPBC1734.12c	SPBC1734.12c	1	1	1	>SPBC1734.12c |alg12||dolichyl pyrophosphate Man7GlcNAc2 alpha-1,6-mannosyltransferase Alg12 |Schizosaccharomyces pombe|chr 2|||Manual	1	1	1	1	1.5	1.5	1.5	62.88	546	546	0.022792	NaN	NaN	NaN	0	0	0	0				505	3699	TRUE	4031	6010	8604	8604
SPBC1734.13	SPBC1734.13	1	1	1	>SPBC1734.13 |atp3||F1-ATPase gamma subunit |Schizosaccharomyces pombe|chr 2|||Manual	1	1	1	1	6.3	6.3	6.3	33.577	301	301	3.6558e-10	NaN	NaN	NaN	0	0	0	0				506	2429	TRUE	2652	4059	5827	5827
SPBC1734.16c	SPBC1734.16c	1	1	1	>SPBC1734.16c |pst3||SIN3 family co-repressor Pst3|Schizosaccharomyces pombe|chr 2|||Manual	1	1	1	1	1.1	1.1	1.1	132.88	1154	1154	0.00037412	NaN	NaN	NaN	1	10599000	6438700	4160100				507	212	TRUE	224	346	493	493
SPBC1773.10c	SPBC1773.10c	4	4	4	>SPBC1773.10c |nrs1|ded81|cytoplasmic asparagine-tRNA ligase Nrs1 |Schizosaccharomyces pombe|chr 2|||Manual	1	4	4	4	9.7	9.7	9.7	63.869	568	568	3.0317e-33	0.78305	0.92316	19.407	5	377340000	201220000	176120000				508	527;900;1408;3062	True;True;True;True	557;955;1500;3330	913;1499;2288;4990;4991	1317;1318;2151;3278;3279;7123;7124;7125	1318;2151;3278;7125
SPBC1778.10c	SPBC1778.10c	1	1	1	>SPBC1778.10c |ppk21|SPBC4C3.11|serine/threonine protein kinase Ppk21|Schizosaccharomyces pombe|chr 2|||Manual	1	1	1	1	2.7	2.7	2.7	62.715	551	551	9.3411e-06	NaN	NaN	NaN	0	0	0	0				509	1888	TRUE	2017	3033	4348	4348
SPBC17A3.04c	SPBC17A3.04c	6	6	6	>SPBC17A3.04c |rar1|mrs1, mes1|cytoplasmic methionine-tRNA ligase Mrs1 |Schizosaccharomyces pombe|chr 2|||Manual	1	6	6	6	13.4	13.4	13.4	88.88	782	782	2.1581e-109	0.74042	0.91132	29.339	11	1220600000	660340000	560270000				510	36;1017;1109;1811;2262;3839	True;True;True;True;True;True	37;1076;1180;1939;2461;4181	64;65;1675;1676;1833;1834;2930;2931;2932;3736;6223	96;97;2401;2402;2403;2650;2651;2652;4204;4205;4206;4207;4208;4209;4210;4211;5347;5348;5349;5350;8919	97;2401;2652;4211;5349;8919	184	590
SPBC17D1.06	SPBC17D1.06	10	10	10	>SPBC17D1.06 |dbp3||ATP-dependent RNA helicase Dbp3 |Schizosaccharomyces pombe|chr 2|||Manual	1	10	10	10	24.6	24.6	24.6	63.912	578	578	6.3726e-27	0.84709	1.0001	18.656	6	103740000	46042000	57699000				511	335;377;999;1166;1627;2260;2538;3170;3530;3634	True;True;True;True;True;True;True;True;True;True	353;396;1058;1238;1740;2459;2767;3448;3846;3962	531;580;581;1651;1904;2636;3734;4214;5154;5740;5916	767;838;839;2361;2748;2749;2750;3786;3787;5344;6035;7351;7352;8224;8472	767;838;2361;2750;3787;5344;6035;7351;8224;8472
SPBC17D11.02c	SPBC17D11.02c	1	1	1	>SPBC17D11.02c |hrd1||ubiquitin-protein ligase Hrd1, synviolin family|Schizosaccharomyces pombe|chr 2|||Manual	1	1	1	1	2.1	2.1	2.1	75.656	677	677	3.4876e-12	0.85328	1.0983	1.803	2	17446000	7410100	10036000				512	2604	TRUE	2842	4315;4316	6180;6181	6180
SPBC17D11.04c	SPBC17D11.04c	1	1	1	>SPBC17D11.04c |nto1||histone acetyltransferase complex subunit Nto1 |Schizosaccharomyces pombe|chr 2|||Manual	1	1	1	1	1.8	1.8	1.8	88.256	767	767	2.5125e-05	NaN	NaN	NaN	1	44057000	16722000	27336000				513	2747	TRUE	2994	4520	6467	6467
SPBC17D11.05	SPBC17D11.05	8	8	8	>SPBC17D11.05 |tif32||translation initiation factor eIF3a|Schizosaccharomyces pombe|chr 2|||Manual	1	8	8	8	14.3	14.3	14.3	107.07	932	932	1.9055e-62	0.72258	0.87979	20.271	9	553780000	295730000	258040000				514	872;1210;1641;1647;1671;1731;2213;2755	True;True;True;True;True;True;True;True	921;1282;1755;1762;1786;1854;2407;3004	1441;1442;1973;2663;2664;2672;2724;2819;3643;4531	2065;2066;2067;2841;3832;3833;3834;3846;3915;4054;4055;5221;6482;6483	2067;2841;3832;3846;3915;4054;5221;6482
SPBC17D11.07c	SPBC17D11.07c	5	5	5	>SPBC17D11.07c |rpn2||19S proteasome regulatory subunit Rpn2 |Schizosaccharomyces pombe|chr 2|||Manual	1	5	5	5	9.1	9.1	9.1	107.28	965	965	1.517e-72	0.7197	0.90585	21.855	6	415820000	232190000	183630000				515	44;734;1470;1879;3647	True;True;True;True;True	47;777;1565;2008;3976	79;1231;1232;2368;3021;3022;5931;5932	113;1762;1763;1764;1765;1766;3404;4333;4334;8495;8496;8497	113;1766;3404;4334;8495
SPBC17G9.03c	SPBC17G9.03c	1	1	1	>SPBC17G9.03c |krs1||cytoplasmic lysine-tRNA ligase Krs1 |Schizosaccharomyces pombe|chr 2|||Manual	1	1	1	1	2.5	2.5	2.5	67.493	591	591	0.0027189	NaN	NaN	NaN	0	0	0	0				516	2168	TRUE	2344	3526;3527	5053;5054	5054
SPBC17G9.04c	SPBC17G9.04c	1	1	1	>SPBC17G9.04c |nup85|ptr5|nucleoporin Nup85|Schizosaccharomyces pombe|chr 2|||Manual	1	1	1	1	2.7	2.7	2.7	78.021	675	675	0.02523	NaN	NaN	NaN	1	20941000	9310200	11631000				517	2718	TRUE	2964	4484	6421	6421
SPBC17G9.07	SPBC17G9.07	1	1	1	>SPBC17G9.07 |rps2402|rps24-2|40S ribosomal protein S24 |Schizosaccharomyces pombe|chr 2|||Manual	1	1	1	1	11.2	11.2	11.2	15.539	134	134	2.2612e-08	NaN	NaN	NaN	1	56593000	32840000	23753000				518	2977	TRUE	3238	4870	6952;6953	6953
SPBC17G9.09	SPBC17G9.09	3	3	3	>SPBC17G9.09 |tif213||translation initiation factor eIF2 gamma subunit |Schizosaccharomyces pombe|chr 2|||Manual	1	3	3	3	9.9	9.9	9.9	48.78	446	446	2.6594e-43	0.94349	1.1135	11.668	3	231140000	116920000	114220000				519	56;1076;3799	True;True;True	59;1138;4138	93;1761;6160	136;137;2528;2529;8829;8830	137;2529;8829
SPBC17G9.11c	SPBC17G9.11c	13	13	13	>SPBC17G9.11c |pyr1||pyruvate carboxylase Pyr1|Schizosaccharomyces pombe|chr 2|||Manual	1	13	13	13	16.9	16.9	16.9	130.86	1185	1185	2.2674e-106	0.87021	1.0999	25.017	12	742260000	391980000	350280000				520	342;363;769;770;1508;1571;1835;1920;2078;3394;3429;3624;3638	True;True;True;True;True;True;True;True;True;True;True;True;True	360;381;814;815;1606;1680;1963;2051;2223;2224;3698;3734;3952;3966	540;565;1284;1285;2445;2561;2562;2972;3077;3300;3301;5525;5573;5902;5920	778;812;813;814;1841;1842;3513;3678;3679;4273;4274;4408;4409;4743;4744;4745;4746;7917;7918;7919;7983;8456;8479	778;814;1841;1842;3513;3678;4274;4409;4745;7918;7983;8456;8479	185	648
SPBC1815.01	SPBC1815.01	18	18	18	>SPBC1815.01 |eno101|eno1|enolase |Schizosaccharomyces pombe|chr 2|||Manual	1	18	18	18	59.2	59.2	59.2	47.435	439	439	0	0.8374	0.96153	21.692	26	5202600000	2592200000	2610400000				521	59;60;157;158;238;239;352;964;1196;1628;1738;2054;2187;2411;2725;3550;3747;3798	True;True;True;True;True;True;True;True;True;True;True;True;True;True;True;True;True;True	62;63;164;165;166;167;252;253;370;1020;1268;1741;1862;1863;2199;2373;2374;2633;2971;3868;4082;4137	96;97;98;269;270;271;272;379;380;381;554;1582;1953;2637;2828;2829;2830;3264;3265;3591;3592;3593;4034;4491;4492;4493;5765;5766;6078;6079;6159	142;143;144;145;146;379;380;381;382;383;384;385;536;537;538;539;540;798;2271;2272;2816;2817;3788;4066;4067;4068;4069;4692;4693;4694;4695;5148;5149;5150;5787;6429;6430;6431;8260;8261;8712;8713;8714;8827;8828	142;143;381;385;536;540;798;2272;2816;3788;4068;4693;5149;5787;6430;8260;8713;8827	186;187;188;189	49;116;361;370
SPBC1826.01c	SPBC1826.01c	3	3	3	>SPBC1826.01c |mot1||TATA-binding protein associated factor Mot1 |Schizosaccharomyces pombe|chr 2|||Manual	1	3	3	3	2.2	2.2	2.2	217.63	1953	1953	1.1357e-21	1.3216	1.5634	20.497	3	187180000	73315000	113870000				522	331;594;1919	True;True;True	348;629;2050	525;1026;3076	759;760;1479;1480;1481;4407	759;1480;4407
SPBC18E5.04	SPBC18E5.04	4	4	1	>SPBC18E5.04 |rpl1001|rpl10-1, rpl10|60S ribosomal protein L10|Schizosaccharomyces pombe|chr 2|||Manual	1	4	4	1	30.8	30.8	5	25.373	221	221	1.1158e-34	0.7352	0.90314	18.811	5	959990000	514350000	445650000				523	115;993;1225;3544	True;True;True;True	119;1052;1300;3861;3862	214;215;1641;1995;5757;5758	303;304;2348;2349;2870;8249;8250;8251;8252	303;2349;2870;8252	190	136
SPBC18E5.11c	SPBC18E5.11c	1	1	1	>SPBC18E5.11c |edc3|SPBC23G7.01c|enhancer of mRNA decapping Edc3 |Schizosaccharomyces pombe|chr 2|||Manual	1	1	1	1	5.9	5.9	5.9	49.218	454	454	3.8448e-36	NaN	NaN	NaN	1	52032000	25178000	26854000				524	3271	TRUE	3564	5330	7602	7602
SPBC18H10.02	SPBC18H10.02	3	3	3	>SPBC18H10.02 |lcf1||long-chain-fatty-acid-CoA ligase Lcf1|Schizosaccharomyces pombe|chr 2|||Manual	1	3	3	3	6.5	6.5	6.5	75.965	676	676	9.4564e-32	0.72856	0.88672	27.133	4	212060000	115970000	96099000				525	2331;3220;3478	True;True;True	2536;3503;3787	3840;5227;5669;5670	5495;7452;7453;8125;8126;8127	5495;7453;8126
SPBC18H10.03	SPBC18H10.03	2	2	2	>SPBC18H10.03 |tif35||translation initiation factor eIF3g|Schizosaccharomyces pombe|chr 2|||Manual	1	2	2	2	12.8	12.8	12.8	31.494	282	282	9.7683e-49	0.67594	0.74229	39.623	2	170460000	115840000	54616000				526	472;1971	True;True	499;2110	738;3158	1078;1079;4530	1079;4530
SPBC18H10.12c	SPBC18H10.12c	8	8	8	>SPBC18H10.12c |rpl701||60S ribosomal protein L7|Schizosaccharomyces pombe|chr 2|||Manual	1	8	8	8	46.2	46.2	46.2	28.73	251	251	2.0687e-145	0.71334	0.85638	22.955	14	1315500000	737090000	578370000				527	53;297;307;308;588;1161;2415;3817	True;True;True;True;True;True;True;True	56;312;324;325;621;622;1233;2637;4158	89;90;468;490;491;492;493;1015;1016;1017;1899;4040;4041;6192	129;130;131;132;133;673;708;709;710;711;712;713;714;715;1460;1461;1462;1463;1464;1465;1466;2740;2741;5799;5800;5801;8879	132;673;711;715;1460;2741;5801;8879	191	134
SPBC1921.01c	SPBC1921.01c	4	4	4	>SPBC1921.01c |rpl35b|rpl37-1, rpl37|60S ribosomal protein L35a |Schizosaccharomyces pombe|chr 2|||Manual	1	4	4	4	29.6	29.6	29.6	12.187	108	108	3.3586e-19	0.60655	0.7807	10.543	6	74322000	46953000	27369000				528	1131;1398;2812;3471	True;True;True;True	1203;1490;3062;3780	1861;2275;4609;4610;5659;5660	2691;3262;6585;6586;6587;8110;8111;8112	2691;3262;6587;8112
SPBC1921.07c	SPBC1921.07c	5	5	5	>SPBC1921.07c |sgf29|SPBC21D10.13|SAGA complex subunit Sgf29|Schizosaccharomyces pombe|chr 2|||Manual	1	5	5	5	27	27	27	27.519	244	244	9.5831e-50	2.3008	2.7138	3.6334	2	292780000	72655000	220130000				529	565;1105;3580;3581;3805	True;True;True;True;True	596;1176;3901;3902;4144	974;1826;5807;5808;5809;6172	1400;2636;8318;8319;8320;8321;8846	1400;2636;8318;8321;8846	192	76
SPBC19C2.07	SPBC19C2.07	11	11	11	>SPBC19C2.07 |fba1||fructose-bisphosphate aldolase Fba1|Schizosaccharomyces pombe|chr 2|||Manual	1	11	11	11	58.9	58.9	58.9	39.57	358	358	0	0.92085	0.98538	23.948	22	3732200000	1870500000	1861600000				530	277;536;580;903;1240;1241;1973;2751;2925;3286;3543	True;True;True;True;True;True;True;True;True;True;True	292;566;612;958;1316;1317;1318;2112;2999;3000;3178;3581;3860	436;926;927;1000;1502;1503;2024;2025;2026;2027;2028;2029;2030;3161;3162;4525;4526;4527;4787;4788;5357;5755;5756	621;622;1336;1337;1434;1435;2156;2157;2158;2159;2910;2911;2912;2913;2914;2915;2916;2917;2918;4533;4534;6473;6474;6475;6476;6477;6835;6836;6837;7644;7645;8246;8247;8248	621;1336;1435;2158;2911;2917;4534;6475;6837;7645;8247	193;194	105;141
SPBC19C2.14	SPBC19C2.14	1	1	1	>SPBC19C2.14 |smd3||Sm snRNP core protein Smd3|Schizosaccharomyces pombe|chr 2|||Manual	1	1	1	1	9.3	9.3	9.3	11.033	97	97	0.00031354	NaN	NaN	NaN	1	25420000	11400000	14020000				531	735	TRUE	778	1233	1767	1767
SPBC19C7.06	SPBC19C7.06	11	11	11	>SPBC19C7.06 |prs1||cytoplasmic proline-tRNA ligase Prs1 |Schizosaccharomyces pombe|chr 2|||Manual	1	11	11	11	25.1	25.1	25.1	78.874	716	716	3.6848e-110	0.72953	0.79643	23.979	9	537340000	274160000	263180000				532	113;450;480;1493;1735;2748;2940;3012;3474;3492;3683	True;True;True;True;True;True;True;True;True;True;True	117;475;507;1589;1859;2995;3198;3275;3783;3806;4015	212;703;747;2423;2424;2425;2825;4521;4818;4819;4920;5663;5694;5992	301;1022;1092;3481;3482;3483;3484;4061;6468;6889;6890;7027;8116;8161;8583;8584	301;1022;1092;3484;4061;6468;6890;7027;8116;8161;8583
SPBC19F5.02c	SPBC19F5.02c	1	1	1	>SPBC19F5.02c |utp4||U3 snoRNP protein Utp4 |Schizosaccharomyces pombe|chr 2|||Manual	1	1	1	1	2.4	2.4	2.4	79.121	710	710	1.3763e-06	NaN	NaN	NaN	1	36427000	15789000	20639000				533	705	TRUE	748	1190;1191	1711;1712	1712
SPBC19F5.03	SPBC19F5.03	2	2	2	>SPBC19F5.03 |||inositol polyphosphate phosphatase |Schizosaccharomyces pombe|chr 2|||Manual	1	2	2	2	3.7	3.7	3.7	68.712	598	598	2.8308e-05	0.79653	0.97782	10.853	2	252440000	135910000	116530000				534	997;1874	True;True	1056;2003	1646;3014	2354;4324;4325	2354;4324
SPBC19F5.04	SPBC19F5.04	1	1	1	>SPBC19F5.04 |||aspartate kinase |Schizosaccharomyces pombe|chr 2|||Manual	1	1	1	1	3.5	3.5	3.5	56.812	519	519	1.0216e-35	NaN	NaN	NaN	1	50694000	23550000	27145000				535	1761	TRUE	1887	2863;2864	4111;4112;4113	4111
SPBC19F5.05c	SPBC19F5.05c	1	1	1	>SPBC19F5.05c |ppp1|SPBC25D12.01c|pescadillo-family BRCT domain protein |Schizosaccharomyces pombe|chr 2|||Manual	1	1	1	1	1.3	1.3	1.3	69.188	607	607	0.00065311	NaN	NaN	NaN	0	0	0	0				536	785	TRUE	831	1306	1880	1880
SPBC19F8.08;SPAC959.07;SPBC21B10.10	SPBC19F8.08;SPAC959.07;SPBC21B10.10	10;9;9	10;9;9	10;9;9	>SPBC19F8.08 |rps401|rps4-1, rps4, SPBC25H2.17c|40S ribosomal protein S4 |Schizosaccharomyces pombe|chr 2|||Manual;>SPAC959.07 |rps403|rps4-3, rps4|40S ribosomal protein S4 |Schizosaccharomyces pombe|chr 1|||Manual;>SPBC21B10.10 |rps402|rps4-2|40S ribosoma	3	10	10	10	46.9	46.9	46.9	29.688	262	262;262;262	3.4519e-109	0.70101	0.85585	20.436	12	894370000	510850000	383520000				537	265;521;537;1935;2016;3079;3336;3337;3431;3538	True;True;True;True;True;True;True;True;True;True	280;550;567;2071;2158;3350;3351;3634;3635;3736;3855	418;901;902;903;928;3100;3214;5019;5020;5440;5441;5442;5575;5576;5577;5578;5750	594;1300;1301;1302;1338;4436;4614;4615;7163;7164;7777;7778;7779;7780;7781;7782;7985;7986;7987;7988;7989;7990;7991;8239	594;1300;1338;4436;4614;7163;7779;7781;7990;8239
SPBC19G7.01c	SPBC19G7.01c	1	1	1	>SPBC19G7.01c |msh2|swi8, mut3, SPBC24C6.12c|MutS protein homolog 2|Schizosaccharomyces pombe|chr 2|||Manual	1	1	1	1	1.3	1.3	1.3	109.74	982	982	8.5201e-07	NaN	NaN	NaN	0	0	0	0				538	1260	TRUE	1339	2055	2953	2953
SPBC19G7.05c	SPBC19G7.05c	3	1	1	>SPBC19G7.05c |bgs1|cps1, drc1|1,3-beta-glucan synthase catalytic subunit Bgs1|Schizosaccharomyces pombe|chr 2|||Manual	1	3	1	1	1.8	0.9	0.9	199.67	1729	1729	2.6338e-06	NaN	NaN	NaN	1	2970800	1667400	1303300				539	1145;3260;3613	True;False;False	1217;3551;3940	1878;5313;5886	2713;2714;7581;8434;8435	2713;7581;8434
SPBC19G7.17	SPBC19G7.17	1	1	1	>SPBC19G7.17 ||SPBC36B7.01|translocon subunit Sec61 homolog |Schizosaccharomyces pombe|chr 2|||Manual	1	1	1	1	4	4	4	52.438	475	475	3.1095e-10	NaN	NaN	NaN	1	18993000	11621000	7372000				540	707	TRUE	750	1193	1715	1715
SPBC1A4.02c	SPBC1A4.02c	7	7	7	>SPBC1A4.02c |leu1|SPBC1E8.07c|3-isopropylmalate dehydrogenase Leu1|Schizosaccharomyces pombe|chr 2|||Manual	1	7	7	7	30.7	30.7	30.7	39.732	371	371	2.5667e-126	0.95275	1.129	18.456	12	1636000000	751300000	884750000				541	916;1481;1638;1639;2353;2897;3824	True;True;True;True;True;True;True	971;1577;1752;1753;2561;2562;3148;4165	1522;1523;2408;2409;2659;2660;2661;3871;3872;3873;3874;3875;4738;6200	2185;2186;2187;2188;3457;3458;3459;3460;3828;3829;3830;5537;5538;5539;5540;5541;5542;5543;5544;6760;8890;8891	2187;3457;3828;3830;5542;6760;8890	195	228
SPBC1A4.03c	SPBC1A4.03c	2	2	2	>SPBC1A4.03c |top2|ptr11|DNA topoisomerase II|Schizosaccharomyces pombe|chr 2|||Manual	1	2	2	2	2.2	2.2	2.2	167.89	1485	1485	7.7035e-20	NaN	NaN	NaN	1	41476000	19466000	22010000				542	688;3612	True;True	728;3939	1157;5885	1661;8431;8432;8433	1661;8432
SPBC1A4.05	SPBC1A4.05	2	2	2	>SPBC1A4.05 |blt1||Blt1|Schizosaccharomyces pombe|chr 2|||Manual	1	2	2	2	5.6	5.6	5.6	78.116	700	700	1.0177e-12	NaN	NaN	NaN	1	29809000	17465000	12343000				543	1590;1681	True;True	1701;1800	2587;2743	3713;3940	3713;3940
SPBC1A4.08c	SPBC1A4.08c	6	6	6	>SPBC1A4.08c |cct3||chaperonin-containing T-complex gamma subunit Cct3|Schizosaccharomyces pombe|chr 2|||Manual	1	6	6	6	20.6	20.6	20.6	58.48	528	528	2.893e-103	0.84512	0.90176	24.646	10	849230000	454890000	394340000				544	32;1463;2154;3251;3632;3703	True;True;True;True;True;True	33;1558;2322;2323;3542;3960;4035;4036	58;2360;3498;3499;3500;5300;5911;5912;5913;6015;6016;6017;6018	90;3386;3387;3388;5011;5012;5013;5014;5015;7557;7558;8466;8467;8468;8611;8612;8613;8614;8615;8616	90;3386;5013;7558;8468;8615	196;197	47;170
SPBC1D7.04	SPBC1D7.04	2	2	2	>SPBC1D7.04 |mlo3||RNA binding protein Mlo3|Schizosaccharomyces pombe|chr 2|||Manual	1	2	2	2	19.1	19.1	19.1	21.791	199	199	7.0726e-21	0.55191	0.55292	92.797	2	109550000	71016000	38534000				545	1273;2896	True;True	1353;3147	2081;4737	2999;6759	2999;6759	198	3
SPBC1E8.02	SPBC1E8.02	1	1	1	>SPBC1E8.02 |||ubiquitin family protein |Schizosaccharomyces pombe|chr 2|||Manual	1	1	1	1	2	2	2	66.566	603	603	0.0049412	NaN	NaN	NaN	1	14397000	8869700	5527500				546	2836	TRUE	3086	4661	6654	6654
SPBC20F10.01	SPBC20F10.01	2	2	2	>SPBC20F10.01 |gar1|SPBC25H2.01c|snoRNP pseudouridylase box H/ACA snoRNP complex protein Gar1|Schizosaccharomyces pombe|chr 2|||Manual	1	2	2	2	15.5	15.5	15.5	20.131	194	194	5.804e-17	0.9407	1.0261	10.952	2	251320000	118530000	132790000				547	1377;3415	True;True	1469;3719	2243;5555	3215;3216;7958	3216;7958
SPBC211.06	SPBC211.06	2	2	2	>SPBC211.06 |gfh1||gamma tubulin complex subunit Gfh1|Schizosaccharomyces pombe|chr 2|||Manual	1	2	2	2	4.9	4.9	4.9	66.764	577	577	0.00019409	NaN	NaN	NaN	1	15080000	11070000	4009300				548	572;1258	True;True	603;1337	985;2053	1415;2951	1415;2951
SPBC211.07c	SPBC211.07c	1	1	1	>SPBC211.07c |ubc8||ubiquitin conjugating enzyme Ubc8 |Schizosaccharomyces pombe|chr 2|||Manual	1	1	1	1	14.1	14.1	14.1	20.99	184	184	7.7283e-15	NaN	NaN	NaN	1	26243000	16502000	9740700				549	3809	TRUE	4149	6180	8861	8861
SPBC215.05	SPBC215.05	4	4	4	>SPBC215.05 |gpd1||glycerol-3-phosphate dehydrogenase Gpd1|Schizosaccharomyces pombe|chr 2|||Manual	1	4	4	4	19	19	19	41.995	385	385	1.1087e-40	1.0455	1.1988	7.273	5	309080000	133750000	175330000				550	2006;2561;2832;3790	True;True;True;True	2147;2794;3082;4129	3203;4254;4255;4656;6149	4601;6090;6091;6092;6648;8809;8810	4601;6092;6648;8810
SPBC215.09c	SPBC215.09c	9	9	9	>SPBC215.09c |erg10||acetyl-CoA C-acetyltransferase Erg10 |Schizosaccharomyces pombe|chr 2|||Manual	1	9	9	9	34.9	34.9	34.9	40.997	395	395	1.0861e-67	0.76146	0.89248	17.173	8	685000000	348230000	336770000				551	68;1235;1251;1252;1261;3247;3368;3546;3744	True;True;True;True;True;True;True;True;True	72;1311;1329;1330;1340;3538;3670;3864;4079	155;2015;2016;2043;2044;2045;2056;5293;5487;5761;6075	222;223;2900;2901;2936;2937;2938;2939;2954;2955;2956;2957;7547;7548;7852;8255;8707;8708	223;2900;2936;2938;2957;7548;7852;8255;8707
SPBC216.07c;SPBC30D10.10c	SPBC216.07c	13;1	13;1	13;1	>SPBC216.07c |tor2|SPBC646.01c|phosphatidylinositol kinase Tor2|Schizosaccharomyces pombe|chr 2|||Manual	2	13	13	13	8.1	8.1	8.1	266.38	2337	2337;2335	1.4711e-126	0.77316	0.91145	19.162	12	531990000	276750000	255250000				552	18;264;1167;1686;1781;1837;1862;1882;2014;2501;2697;3217;3572	True;True;True;True;True;True;True;True;True;True;True;True;True	19;279;1239;1807;1908;1965;1991;2011;2156;2729;2941;3499;3892	40;416;417;1905;2753;2754;2892;2893;2974;3001;3025;3212;4163;4453;5223;5796	57;58;592;593;2751;2752;3951;3952;4147;4148;4149;4276;4309;4338;4339;4611;5966;6375;6376;7444;7445;8302;8303	58;593;2752;3951;4149;4276;4309;4339;4611;5966;6376;7445;8302
SPBC21B10.04c	SPBC21B10.04c	1	1	1	>SPBC21B10.04c |nrf1||GTPase regulator Nrf1|Schizosaccharomyces pombe|chr 2|||Manual	1	1	1	1	10.7	10.7	10.7	13.388	122	122	0.010807	NaN	NaN	NaN	1	14414000	6685400	7728400				553	2994	TRUE	3256	4893	6984	6984
SPBC21C3.13	SPBC21C3.13	6	2	2	>SPBC21C3.13 |rps1901|rps19-1|40S ribosomal protein S19 |Schizosaccharomyces pombe|chr 2|||Manual	1	6	2	2	36.8	11.8	11.8	16.15	144	144	2.0422e-55	0.74895	0.9426	13.212	4	535120000	266140000	268980000				554	485;559;711;2111;2195;3126	True;False;True;False;False;False	512;590;754;2260;2385;2386;3404	752;753;965;1197;1198;3359;3614;3615;5095	1099;1100;1101;1102;1389;1722;1723;1724;4823;5174;5175;5176;7268;7269	1100;1389;1724;4823;5176;7268	199	28
SPBC21C3.20c	SPBC21C3.20c	1	1	1	>SPBC21C3.20c |git1||C2 domain protein Git1|Schizosaccharomyces pombe|chr 2|||Manual	1	1	1	1	0.8	0.8	0.8	128.3	1098	1098	0.0029135	NaN	NaN	NaN	1	16264000	12588000	3676300				555	135	TRUE	141	240	339	339
SPBC21D10.09c	SPBC21D10.09c	4	4	4	>SPBC21D10.09c |||ubiquitin-protein ligase E3 |Schizosaccharomyces pombe|chr 2|||Manual	1	4	4	4	3.3	3.3	3.3	184.37	1610	1610	1.3519e-32	0.77302	0.91452	32.48	2	45374000	21823000	23551000				556	1415;1958;2700;3792	True;True;True;True	1507;2097;2944;4131	2297;3141;4456;6151	3291;4506;6379;8813	3291;4506;6379;8813
SPBC21H7.02	SPBC21H7.02	3	3	3	>SPBC21H7.02 |taf10||SAGA complex/transcription factor TFIID complex subunit Taf10|Schizosaccharomyces pombe|chr 2|||Manual	1	3	3	3	20.5	20.5	20.5	23.526	215	215	6.6281e-46	1.7682	2.0981	12.574	4	319370000	99685000	219690000				557	1068;3306;3307	True;True;True	1130;3602;3603	1750;5390;5391;5392;5393	2515;7691;7692;7693;7694;7695;7696;7697;7698	2515;7693;7696
SPBC23E6.04c	SPBC23E6.04c	11	11	11	>SPBC23E6.04c |utp10||U3 snoRNP-associated protein Utp10 |Schizosaccharomyces pombe|chr 2|||Manual	1	11	11	11	10.4	10.4	10.4	186.41	1649	1649	8.8691e-86	0.83773	0.91403	30.049	10	364870000	182020000	182850000				558	320;737;1186;1263;1422;1450;1834;1855;3335;3495;3510	True;True;True;True;True;True;True;True;True;True;True	337;780;1258;1342;1515;1545;1962;1984;3633;3809;3826	510;1235;1934;2058;2059;2307;2343;2344;2971;2993;2994;5439;5697;5718	736;1770;2788;2960;2961;3307;3308;3360;3361;3362;4271;4272;4300;4301;7776;8165;8193;8194	736;1770;2788;2961;3308;3362;4272;4300;7776;8165;8193
SPBC23G7.12c	SPBC23G7.12c	9	9	9	>SPBC23G7.12c |rpt6|let1|19S proteasome regulatory subunit Rpt6 |Schizosaccharomyces pombe|chr 2|||Manual	1	9	9	9	30	30	30	45.069	403	403	3.9427e-111	0.66548	0.82438	27.151	14	1121200000	605200000	516000000				559	534;543;620;1179;1180;1317;1901;3226;3453	True;True;True;True;True;True;True;True;True	564;573;657;1251;1252;1403;1404;2032;3511;3512;3761	922;923;936;937;938;1068;1925;1926;2162;2163;3052;5252;5253;5254;5612	1332;1333;1347;1348;1349;1534;2778;2779;3106;3107;3108;4375;4376;7489;7490;7491;7492;7493;8043	1332;1347;1534;2778;2779;3107;4376;7489;8043	200;201	135;270
SPBC244.02c	SPBC244.02c	1	1	1	>SPBC244.02c |||U3 snoRNP-associated protein Utp6 |Schizosaccharomyces pombe|chr 2|||Manual	1	1	1	1	1.6	1.6	1.6	55.644	488	488	0.010264	NaN	NaN	NaN	1	22523000	11526000	10998000				560	1611	TRUE	1724	2618	3760	3760
SPBC24C6.04	SPBC24C6.04	7	7	7	>SPBC24C6.04 |||delta-1-pyrroline-5-carboxylate dehydrogenase |Schizosaccharomyces pombe|chr 2|||Manual	1	7	7	7	22.6	22.6	22.6	60.218	548	548	2.3792e-85	0.92268	1.0776	18.997	9	826840000	412750000	414090000				561	34;2777;2890;3369;3414;3663;3722	True;True;True;True;True;True;True	35;3027;3141;3671;3718;3993;4057	60;61;62;4555;4729;5488;5551;5552;5553;5554;5954;6046	92;93;94;6513;6514;6515;6748;7853;7854;7954;7955;7956;7957;8529;8666;8667	92;6515;6748;7854;7955;8529;8667
SPBC24C6.05	SPBC24C6.05	3	3	3	>SPBC24C6.05 |sec28||coatomer epsilon subunit |Schizosaccharomyces pombe|chr 2|||Manual	1	3	3	3	18.8	18.8	18.8	31.774	288	288	2.1319e-205	NaN	NaN	NaN	1	7286700	4394100	2892600				562	1670;2423;3010	True;True;True	1785;2645;3273	2721;2722;2723;4052;4918	3912;3913;3914;5817;7024	3913;5817;7024
SPBC25B2.07c	SPBC25B2.07c	2	2	2	>SPBC25B2.07c |mug164||microtubule-associated protein Mug164|Schizosaccharomyces pombe|chr 2|||Manual	1	2	2	2	4.8	4.8	4.8	55.388	517	517	3.0801e-10	0.63593	0.81852	12.796	3	40783000	19184000	21599000				563	296;1471	True;True	311;1566	467;2369;2370	671;672;3405;3406;3407	672;3405
SPBC25B2.09c	SPBC25B2.09c	2	2	2	>SPBC25B2.09c |mrs1|rrs1|mitochondrial and cytoplasmic arginine-tRNA ligase Rrs1/Mrs1 |Schizosaccharomyces pombe|chr 2|||Manual	1	2	2	2	5.3	5.3	5.3	70.689	618	618	1.0824e-18	NaN	NaN	NaN	1	27671000	12233000	15438000				564	1794;2978	True;True	1922;3239	2910;4871	4172;6954	4172;6954
SPBC25D12.03c	SPBC25D12.03c	2	2	2	>SPBC25D12.03c |mcm7||MCM complex subunit Mcm7|Schizosaccharomyces pombe|chr 2|||Manual	1	2	2	2	3.7	3.7	3.7	85.621	760	760	9.2375e-09	0.81593	0.96628	13.174	2	68959000	33953000	35006000				565	210;3356	True;True	222;3657	344;5469	490;491;7825	490;7825
SPBC25D12.04	SPBC25D12.04	1	1	1	>SPBC25D12.04 |suc22||ribonucleotide reductase small subunit Suc22|Schizosaccharomyces pombe|chr 2|||Manual	1	1	1	1	4.1	4.1	4.1	45.405	391	391	0.0001801	NaN	NaN	NaN	1	16374000	9373800	6999700				566	818	TRUE	866	1352	1949	1949
SPBC25H2.02	SPBC25H2.02	17	17	17	>SPBC25H2.02 |trs1|ths1|cytoplasmic threonine-tRNA ligase Trs1 |Schizosaccharomyces pombe|chr 2|||Manual	1	17	17	17	42	42	42	80.137	703	703	0	0.56986	0.6637	17.767	20	2393800000	1454300000	939470000				567	11;468;530;531;926;1002;1024;1048;1181;1182;1232;2136;2539;3266;3340;3670;3779	True;True;True;True;True;True;True;True;True;True;True;True;True;True;True;True;True	11;495;560;561;981;1061;1084;1110;1253;1254;1308;2300;2768;3558;3638;4000;4118	30;733;916;917;918;1537;1654;1684;1685;1724;1725;1927;1928;1929;1930;2010;2011;3466;4215;5323;5446;5447;5448;5964;6136;6137	45;1072;1323;1324;1325;1326;1327;2209;2366;2367;2414;2415;2416;2477;2478;2479;2780;2781;2782;2783;2784;2892;2893;2894;4967;6036;6037;7592;7788;7789;7790;7791;8544;8790;8791;8792	45;1072;1323;1327;2209;2367;2416;2477;2780;2783;2892;4967;6036;7592;7790;8544;8792
SPBC25H2.05	SPBC25H2.05	1	1	1	>SPBC25H2.05 |egd2|nac1|nascent polypeptide-associated complex alpha subunit Egd2|Schizosaccharomyces pombe|chr 2|||Manual	1	1	1	1	7.5	7.5	7.5	18.785	173	173	1.8354e-09	NaN	NaN	NaN	1	54881000	20843000	34037000				568	2263	TRUE	2462	3737	5351	5351
SPBC25H2.11c	SPBC25H2.11c	21	21	21	>SPBC25H2.11c |spt7||SAGA complex bromodomain subunit Spt7|Schizosaccharomyces pombe|chr 2|||Manual	1	21	21	21	28	28	28	112.9	992	992	0	1.7004	2.0874	23.064	39	6259200000	1994500000	4264700000				569	399;438;567;568;691;1061;1231;1355;2127;2130;2131;2490;2749;2750;2821;2822;2831;2863;3768;3785;3810	True;True;True;True;True;True;True;True;True;True;True;True;True;True;True;True;True;True;True;True;True	421;422;462;598;599;732;1123;1307;1447;2283;2284;2288;2289;2718;2996;2997;2998;3071;3072;3081;3113;3114;4106;4124;4150	620;621;622;623;685;686;687;976;977;978;979;980;981;1163;1741;1742;2006;2007;2008;2009;2213;2214;2215;3440;3441;3442;3447;3448;4147;4148;4149;4150;4522;4523;4524;4642;4643;4654;4655;4692;4693;4694;6110;6143;6181	900;901;902;903;904;905;993;994;995;996;1402;1403;1404;1405;1406;1407;1408;1409;1410;1411;1667;2502;2503;2504;2885;2886;2887;2888;2889;2890;2891;3175;3176;3177;3178;3179;4934;4935;4936;4941;4942;5946;5947;5948;5949;6469;6470;6471;6472;6630;6631;6632;6633;6645;6646;6647;6689;6690;6691;6692;6693;6694;8750;8751;8800;8801;8862	905;995;1408;1411;1667;2503;2891;3179;4935;4941;4942;5946;6469;6472;6632;6633;6645;6694;8751;8800;8862	202;203;204;205	1;357;559;703
SPBC25H2.13c	SPBC25H2.13c	1	1	1	>SPBC25H2.13c |cdc20|pol2|DNA polymerase epsilon catalytic subunit Pol2|Schizosaccharomyces pombe|chr 2|||Manual	1	1	1	1	0.5	0.5	0.5	252.88	2199	2199	2.5285e-06	NaN	NaN	NaN	1	10818000	5182600	5635400				570	3104	TRUE	3378	5056	7213	7213
SPBC25H2.14	SPBC25H2.14	1	1	1	>SPBC25H2.14 |mug16||UNC-50 family protein|Schizosaccharomyces pombe|chr 2|||Manual	1	1	1	1	3.8	3.8	3.8	27.765	235	235	0.015808	NaN	NaN	NaN	0	0	0	0				571	1138	TRUE	1210	1868	2701	2701
SPBC26H8.01	SPBC26H8.01	17	17	17	>SPBC26H8.01 |thi2|nmt2|thiazole biosynthetic enzyme|Schizosaccharomyces pombe|chr 2|||Manual	1	17	17	17	57.3	57.3	57.3	35.274	328	328	7.7765e-271	0.81422	0.93786	22.716	31	5693900000	2949100000	2744800000				572	23;24;51;248;328;348;617;1575;1677;1678;1725;1726;1727;2132;2589;3061;3181	True;True;True;True;True;True;True;True;True;True;True;True;True;True;True;True;True	24;25;54;262;345;366;653;654;1685;1793;1794;1795;1796;1797;1848;1849;1850;2290;2291;2292;2825;2826;3329;3459	47;48;49;87;395;522;547;548;1060;1061;1062;2568;2731;2732;2733;2734;2735;2736;2737;2738;2809;2810;2811;2812;2813;2814;2815;3449;3450;3451;3452;4295;4296;4989;5171	72;73;74;75;76;126;127;559;754;755;786;787;788;789;790;791;792;1525;1526;1527;3685;3686;3923;3924;3925;3926;3927;3928;3929;3930;3931;3932;3933;3934;3935;4034;4035;4036;4037;4038;4039;4040;4041;4042;4043;4044;4045;4046;4047;4048;4049;4943;4944;4945;4946;4947;4948;6153;6154;6155;6156;7121;7122;7374	72;75;126;559;755;789;1525;3686;3930;3933;4038;4043;4045;4946;6156;7121;7374	206;207;208;209;210;211;212	256;261;279;284;295;302;303
SPBC26H8.03	SPBC26H8.03	4	4	4	>SPBC26H8.03 |cho2||phosphatidylethanolamine N-methyltransferase Cho2|Schizosaccharomyces pombe|chr 2|||Manual	1	4	4	4	5.5	5.5	5.5	102.76	905	905	1.5846e-18	NaN	NaN	NaN	1	23528000	9184700	14343000				573	1999;2091;2214;3237	True;True;True;True	2138;2237;2408;3526	3194;3323;3644;3645;5273;5274	4588;4772;4773;5222;5223;7516;7517	4588;4773;5222;7517
SPBC26H8.04c	SPBC26H8.04c	1	1	1	>SPBC26H8.04c |||DEP domain protein|Schizosaccharomyces pombe|chr 2|||Manual	1	1	1	1	0.7	0.7	0.7	169.99	1496	1496	0.0032599	NaN	NaN	NaN	0	0	0	0				574	3562	TRUE	3881	5780	8280	8280
SPBC26H8.07c	SPBC26H8.07c	7	7	7	>SPBC26H8.07c |nda3|ben1, alp12|tubulin beta Nda3|Schizosaccharomyces pombe|chr 2|||Manual	1	7	7	7	24.3	24.3	24.3	49.471	448	448	4.7209e-68	0.83686	1.0399	52.129	10	1434800000	523940000	910910000				575	690;887;888;1286;2181;2359;3791	True;True;True;True;True;True;True	731;938;939;1367;2363;2364;2570;4130	1161;1162;1472;1473;1474;1475;2100;3578;3579;3887;6150	1665;1666;2109;2110;2111;2112;2113;3024;5131;5132;5565;8811;8812	1665;2109;2112;3024;5132;5565;8811	213	363
SPBC26H8.08c	SPBC26H8.08c	2	2	2	>SPBC26H8.08c |grn1||GTPase Grn1|Schizosaccharomyces pombe|chr 2|||Manual	1	2	2	2	8.1	8.1	8.1	52.434	470	470	2.0494e-21	0.89503	1.0924	12.256	3	78361000	43985000	34375000				576	871;3378	True;True	920;3680	1440;5500;5501	2064;7872;7873	2064;7872
SPBC27.08c	SPBC27.08c	4	4	4	>SPBC27.08c |sua1|SPBC28F2.01c|sulfate adenylyltransferase|Schizosaccharomyces pombe|chr 2|||Manual	1	4	4	4	15.1	15.1	15.1	54.754	490	490	2.0384e-33	0.90145	1.1081	15.101	8	722880000	359220000	363650000				577	1694;2011;3508;3826	True;True;True;True	1815;2153;3823;3824;4167	2764;2765;3209;5712;5713;5714;5715;5716;6203	3966;3967;3968;4607;4608;8185;8186;8187;8188;8189;8190;8191;8895	3967;4608;8189;8895	214	225
SPBC27B12.03c	SPBC27B12.03c	2	2	2	>SPBC27B12.03c |erg32||C-5 sterol desaturase Erg32|Schizosaccharomyces pombe|chr 2|||Manual	1	2	2	2	9.4	9.4	9.4	39.063	329	329	1.7266e-16	NaN	NaN	NaN	1	21500000	14274000	7225600				578	2121;3541	True;True	2275;3858	3426;5753	4919;8242	4919;8242
SPBC27B12.08	SPBC27B12.08	1	1	1	>SPBC27B12.08 |sip1||Pof6 interacting protein Sip1, predicted AP-1 accessory protein|Schizosaccharomyces pombe|chr 2|||Manual	1	1	1	1	0.6	0.6	0.6	217.69	1919	1919	0.048289	NaN	NaN	NaN	0	0	0	0				579	2177	TRUE	2358	3571	5122	5122
SPBC27B12.13	SPBC27B12.13	1	1	1	>SPBC27B12.13 |tom40|SPBC8D2.22|mitochondrial TOM complex subunit Tom40 |Schizosaccharomyces pombe|chr 2|||Manual	1	1	1	1	4.9	4.9	4.9	37.552	344	344	8.2544e-05	NaN	NaN	NaN	1	21339000	11458000	9880900				580	623	TRUE	661	1072	1539	1539
SPBC28E12.06c	SPBC28E12.06c	4	4	4	>SPBC28E12.06c |lvs1|SPBC3H7.16|beige protein homolog |Schizosaccharomyces pombe|chr 2|||Manual	1	4	4	4	1.7	1.7	1.7	295.65	2609	2609	5.2468e-09	0.42806	0.5068	20.023	2	32625000	21634000	10991000				581	1945;2295;2712;3657	True;True;True;True	2083;2494;2958;3987	3123;3779;4478;5948	4481;5407;6409;8522	4481;5407;6409;8522
SPBC28F2.03	SPBC28F2.03	1	1	1	>SPBC28F2.03 |ppi1|cyp2|cyclophilin family peptidyl-prolyl cis-trans isomerase Cyp2|Schizosaccharomyces pombe|chr 2|||Manual	1	1	1	1	7.4	7.4	7.4	17.402	162	162	6.5064e-07	NaN	NaN	NaN	1	23937000	10439000	13498000				582	1454	TRUE	1549	2350	3373	3373
SPBC28F2.10c	SPBC28F2.10c	2	2	2	>SPBC28F2.10c |ngg1|ada3|SAGA complex subunit Ngg1|Schizosaccharomyces pombe|chr 2|||Manual	1	2	2	2	13.2	13.2	13.2	62.407	551	551	6.6433e-29	1.8121	2.2999	28.7	2	289370000	98209000	191160000				583	2885;3587	True;True	3136;3908	4722;5817	6738;6739;8333;8334	6738;8334
SPBC28F2.11	SPBC28F2.11	1	1	1	>SPBC28F2.11 |||HMG box protein|Schizosaccharomyces pombe|chr 2|||Manual	1	1	1	1	4.2	4.2	4.2	33.891	310	310	1.2732e-05	NaN	NaN	NaN	1	60849000	14080000	46769000				584	1643	TRUE	1757	2666	3836;3837	3837
SPBC28F2.12	SPBC28F2.12	3	3	3	>SPBC28F2.12 |rpb1||RNA polymerase II large subunit Rpb1|Schizosaccharomyces pombe|chr 2|||Manual	1	3	3	3	2.5	2.5	2.5	194.16	1752	1752	1.6199e-12	0.75965	0.82721	16.84	3	106360000	59472000	46887000				585	1270;1583;2454	True;True;True	1349;1694;2680	2072;2578;4099	2987;3697;3698;5883	2987;3697;5883
SPBC29A10.04	SPBC29A10.04	1	1	1	>SPBC29A10.04 |psm1|smc1|mitotic cohesin complex subunit Psm1|Schizosaccharomyces pombe|chr 2|||Manual	1	1	1	1	1.5	1.5	1.5	140.52	1228	1228	0.0019661	NaN	NaN	NaN	0	0	0	0				586	2840	TRUE	3090	4665	6660	6660
SPBC29A10.07	SPBC29A10.07	2	2	2	>SPBC29A10.07 |pom152||nucleoporin Pom152|Schizosaccharomyces pombe|chr 2|||Manual	1	2	2	2	1.9	1.9	1.9	139.58	1250	1250	5.9174e-05	0.87885	1.008	24.078	2	56048000	30256000	25792000				587	1779;2953	True;True	1906;3211	2890;4837	4145;6909	4145;6909
SPBC29A3.01	SPBC29A3.01	1	1	1	>SPBC29A3.01 |ccc2||copper transporting ATPase Ccc2 |Schizosaccharomyces pombe|chr 2|||Manual	1	1	1	1	1.3	1.3	1.3	97.894	904	904	0.0056313	NaN	NaN	NaN	0	0	0	0				588	2781	TRUE	3031	4559	6520	6520
SPBC29A3.02c	SPBC29A3.02c	1	1	1	>SPBC29A3.02c |his7||phosphoribosyl-AMP cyclohydrolase/phosphoribosyl-ATP pyrophosphohydrolase His7|Schizosaccharomyces pombe|chr 2|||Manual	1	1	1	1	3.8	3.8	3.8	46.182	417	417	5.8198e-09	NaN	NaN	NaN	0	0	0	0				589	3221	TRUE	3504	5228	7454	7454
SPBC29A3.04	SPBC29A3.04	6	6	6	>SPBC29A3.04 |rpl8||60S ribosomal protein L7a/L8 |Schizosaccharomyces pombe|chr 2|||Manual	1	6	6	6	18.9	18.9	18.9	28.606	259	259	1.7401e-32	0.77488	0.77582	28.774	7	788470000	429060000	359410000				590	2057;2348;2707;3280;3739;3740	True;True;True;True;True;True	2202;2556;2953;3574;4074;4075	3268;3865;4471;5347;6067;6068;6069;6070	4698;5525;5526;6397;7629;8696;8697;8698;8699;8700	4698;5526;6397;7629;8698;8699
SPBC29A3.06	SPBC29A3.06	1	1	1	>SPBC29A3.06 |||CGI-48 family |Schizosaccharomyces pombe|chr 2|||Manual	1	1	1	1	3.2	3.2	3.2	62.472	555	555	6.9814e-17	NaN	NaN	NaN	1	46229000	32378000	13851000				591	1491	TRUE	1587	2421	3478;3479	3478
SPBC29A3.18	SPBC29A3.18	2	2	2	>SPBC29A3.18 |cyt1||cytochrome c1 Cyt1 |Schizosaccharomyces pombe|chr 2|||Manual	1	2	2	2	8.5	8.5	8.5	34.34	307	307	2.4652e-08	0.86647	1.0597	28.922	2	20167000	13093000	7074100				592	497;1216	True;True	526;1290	830;1982	1207;2851	1207;2851
SPBC29B5.03c	SPBC29B5.03c	4	4	4	>SPBC29B5.03c |rpl26||60S ribosomal protein L26 |Schizosaccharomyces pombe|chr 2|||Manual	1	4	4	4	14.3	14.3	14.3	14.341	126	126	1.291e-14	0.69977	0.84311	11.687	4	492510000	274190000	218320000				593	736;1519;1549;3515	True;True;True;True	779;1618;1657;3831	1234;2469;2528;5723	1768;1769;3547;3548;3549;3634;3635;8200	1769;3549;3634;8200
SPBC2D10.10c	SPBC2D10.10c	10	10	10	>SPBC2D10.10c |fib1|fib|fibrillarin|Schizosaccharomyces pombe|chr 2|||Manual	1	10	10	10	47.9	47.9	47.9	32.04	305	305	9.4724e-106	1.0477	1.2876	55.54	15	3947800000	1868200000	2079600000				594	1051;1285;1429;1444;1445;1635;2167;2814;3449;3533	True;True;True;True;True;True;True;True;True;True	1113;1366;1523;1539;1540;1749;2343;3064;3755;3850	1728;2097;2098;2099;2316;2337;2338;2653;2654;2655;3524;3525;4613;4614;5604;5744	2483;2484;3020;3021;3022;3023;3319;3320;3349;3350;3351;3352;3353;3354;3820;3821;3822;3823;3824;5051;5052;6591;6592;6593;8029;8229	2484;3023;3320;3349;3351;3822;5052;6592;8029;8229
SPBC2D10.14c	SPBC2D10.14c	18	18	18	>SPBC2D10.14c |myo51||myosin type V|Schizosaccharomyces pombe|chr 2|||Manual	1	18	18	18	18	18	18	167.66	1471	1471	3.4068e-216	0.92945	0.99659	24.243	17	1303300000	596450000	706810000				595	7;14;84;796;1060;1142;1828;2001;2046;2425;2426;2533;2662;2713;2959;3011;3500;3762	True;True;True;True;True;True;True;True;True;True;True;True;True;True;True;True;True;True	7;14;88;842;1122;1214;1956;2141;2191;2647;2648;2762;2903;2959;3218;3219;3274;3815;4099	9;33;174;1322;1323;1739;1740;1872;1873;2962;3197;3255;4054;4055;4206;4398;4479;4844;4845;4919;5703;6102;6103	10;48;253;1907;1908;1909;1910;2499;2500;2501;2706;2707;4260;4261;4591;4680;5820;5821;5822;6027;6298;6410;6411;6412;6917;6918;7025;7026;8172;8173;8742;8743	10;48;253;1908;2501;2707;4260;4591;4680;5821;5822;6027;6298;6412;6917;7026;8173;8742	215	632
SPBC2F12.03c	SPBC2F12.03c	1	1	1	>SPBC2F12.03c |||EST1 family protein |Schizosaccharomyces pombe|chr 2|||Manual	1	1	1	1	1.3	1.3	1.3	98.567	891	891	0.00048491	NaN	NaN	NaN	0	0	0	0				596	2767	TRUE	3016	4544	6500	6500
SPBC2F12.04	SPBC2F12.04	3	2	2	>SPBC2F12.04 |rpl1701|rpl17, rpl17-1|60S ribosomal protein L17|Schizosaccharomyces pombe|chr 2|||Manual	1	3	2	2	18.2	5.3	5.3	20.814	187	187	2.3665e-24	0.88533	0.89802	19.193	2	153070000	79901000	73165000				597	678;3018;3608	True;True;False	718;3283;3935	1145;4931;5881	1642;1643;7040;8427	1643;7040;8427
SPBC2F12.14c	SPBC2F12.14c	3	3	3	>SPBC2F12.14c |gua1||IMP dehydrogenase Gua1 |Schizosaccharomyces pombe|chr 2|||Manual	1	3	3	3	9.9	9.9	9.9	57.026	524	524	1.3024e-39	0.89895	0.91505	8.3191	3	344630000	168340000	176290000				598	749;2647;2820	True;True;True	794;2887;3070	1253;1254;4375;4641	1796;1797;6266;6267;6629	1796;6267;6629
SPBC2G2.04c	SPBC2G2.04c	1	1	1	>SPBC2G2.04c |mmf1|pmf1|YjgF family protein Mmf1|Schizosaccharomyces pombe|chr 2|||Manual	1	1	1	1	11.7	11.7	11.7	17.543	162	162	5.6603e-11	NaN	NaN	NaN	0	0	0	0				599	2437	TRUE	2660	4068	5837	5837
SPBC2G2.08	SPBC2G2.08	3	3	3	>SPBC2G2.08 |ade9||C-1-tetrahydrofolatesynthase/methylenetetrahydrofolatedehydrogenase/methylenetetrahydrofolatecyclohydrolase/ formyltetrahydrofolatesynthetase |Schizosaccharomyces pombe|chr 2|||Manual	1	3	3	3	5	5	5	105.76	972	972	9.5746e-20	0.74914	0.82696	11.816	3	233100000	129480000	103620000				600	1824;2079;3000	True;True;True	1952;2225;3262	2954;3302;4901	4246;4247;4747;6995;6996	4247;4747;6996
SPBC2G5.01	SPBC2G5.01	1	1	1	>SPBC2G5.01 |||DUF1682 family protein|Schizosaccharomyces pombe|chr 2|||Manual	1	1	1	1	2.9	2.9	2.9	43.097	374	374	9.3421e-08	0.95485	1.1677	13.96	2	92769000	55333000	37435000				601	2396	TRUE	2614	3998;3999	5718;5719;5720;5721	5720
SPBC2G5.05	SPBC2G5.05	6	6	6	>SPBC2G5.05 |||transketolase |Schizosaccharomyces pombe|chr 2|||Manual	1	6	6	6	19.4	19.4	19.4	75.181	685	685	3.8298e-60	0.81132	0.99533	10.58	10	959560000	465680000	493880000				602	2507;2732;3110;3242;3473;3651	True;True;True;True;True;True	2736;2978;2979;3384;3533;3782;3980	4175;4176;4500;4501;4502;4503;5062;5284;5662;5937;5938	5981;5982;5983;6438;6439;6440;6441;6442;7222;7532;8115;8507;8508	5982;6438;7222;7532;8115;8508	216	37
SPBC2G5.06c	SPBC2G5.06c	12	12	12	>SPBC2G5.06c |hmt2|cad1|sulfide-quinone oxidoreductase|Schizosaccharomyces pombe|chr 2|||Manual	1	12	12	12	39.9	39.9	39.9	51.574	459	459	1.5089e-295	0.97405	1.1002	22.019	16	2301200000	1081700000	1219500000				603	561;767;949;1353;1787;1788;2307;2316;2907;3526;3527;3757	True;True;True;True;True;True;True;True;True;True;True;True	592;812;1004;1445;1914;1915;2506;2507;2516;3159;3842;3843;4094	968;969;1281;1566;2211;2901;2902;2903;3793;3794;3795;3805;4756;4757;5736;5737;6096;6097	1392;1393;1394;1395;1837;2247;2248;2249;3171;3172;4158;4159;4160;4161;4162;5427;5428;5429;5430;5431;5443;6790;6791;8218;8219;8220;8221;8734;8735;8736	1395;1837;2247;3172;4158;4160;5428;5443;6791;8219;8221;8735	217	212
SPBC30D10.03c	SPBC30D10.03c	1	1	1	>SPBC30D10.03c |||IMP 5-nucleotidase |Schizosaccharomyces pombe|chr 2|||Manual	1	1	1	1	4.2	4.2	4.2	45.805	405	405	2.5764e-05	NaN	NaN	NaN	1	13359000	8680000	4678700				604	1762	TRUE	1888	2865	4114	4114
SPBC30D10.07c	SPBC30D10.07c	1	1	1	>SPBC30D10.07c |||biotin-protein ligase |Schizosaccharomyces pombe|chr 2|||Manual	1	1	1	1	1.9	1.9	1.9	70.631	631	631	0.017625	NaN	NaN	NaN	1	18409000	9950800	8458500				605	687	TRUE	727	1156	1660	1660
SPBC30D10.13c	SPBC30D10.13c	24	24	24	>SPBC30D10.13c |pdb1||pyruvate dehydrogenase e1 component beta subunit Pdb1|Schizosaccharomyces pombe|chr 2|||Manual	1	24	24	24	73.2	73.2	73.2	39.623	366	366	0	2.2339	2.3091	35.201	109	81427000000	18992000000	62434000000				606	9;10;410;432;466;517;589;590;938;968;969;1479;1812;2567;2791;3109;3222;3223;3388;3402;3403;3597;3598;3653	True;True;True;True;True;True;True;True;True;True;True;True;True;True;True;True;True;True;True;True;True;True;True;True	9;10;433;456;493;546;623;624;625;993;1024;1025;1574;1575;1940;2800;3041;3383;3505;3506;3507;3508;3691;3706;3707;3919;3920;3921;3922;3923;3924;3983	12;13;14;15;16;17;18;19;20;21;22;23;24;25;26;27;28;29;637;638;639;640;676;677;678;679;729;730;879;880;881;882;883;884;885;886;887;888;889;890;891;892;893;894;895;896;897;1018;1019;1020;1021;1552;1587;1588;1589;1590;1591;1592;2379;2380;2381;2382;2383;2384;2385;2386;2387;2388;2389;2390;2391;2392;2393;2394;2395;2396;2397;2398;2399;2400;2401;2402;2403;2404;2405;2933;2934;4261;4572;4573;4574;5061;5229…	13;14;15;16;17;18;19;20;21;22;23;24;25;26;27;28;29;30;31;32;33;34;35;36;37;38;39;40;41;42;43;44;925;926;927;928;929;980;981;982;983;984;1067;1068;1069;1268;1269;1270;1271;1272;1273;1274;1275;1276;1277;1278;1279;1280;1281;1282;1283;1284;1285;1286;1287;1288;1289;1290;1291;1292;1293;1294;1467;1468;1469;1470;1471;1472;1473;2229;2279;2280;2281;2282;2283;2284;2285;2286;2287;2288;3421;3422;3423;3424;342…	24;44;928;983;1067;1275;1468;1473;2229;2281;2288;3421;4213;6101;6535;7221;7456;7476;7897;7935;7937;8355;8388;8513	218;219;220;221;222	38;138;316;333;338
SPBC31A8.01c	SPBC31A8.01c	3	3	3	>SPBC31A8.01c |rtn1|cwl1, SPBC651.13c|reticulon-like protein Rtn1|Schizosaccharomyces pombe|chr 2|||Manual	1	3	3	3	5.8	5.8	5.8	33.659	308	308	1.972e-06	0.82152	1.0048	6.7039	3	17717000	9157900	8559100				607	1019;1097;2779	True;True;True	1078;1162;3029	1678;1805;4557	2406;2407;2604;6518	2406;2604;6518
SPBC31F10.06c	SPBC31F10.06c	5	5	5	>SPBC31F10.06c |sar1||ADP-ribosylation factor Sar1|Schizosaccharomyces pombe|chr 2|||Manual	1	5	5	5	44.2	44.2	44.2	21.28	190	190	1.1898e-50	0.5805	0.64353	19.422	5	261220000	162950000	98270000				608	55;1027;1685;2003;3556	True;True;True;True;True	58;1087;1805;1806;2143;3875	92;1690;2751;2752;3199;5774	135;2424;2425;3949;3950;4594;4595;8272	135;2425;3950;4594;8272	223	48
SPBC31F10.14c	SPBC31F10.14c	1	1	1	>SPBC31F10.14c |hip3|hir3|HIRA interacting protein Hip3|Schizosaccharomyces pombe|chr 2|||Manual	1	1	1	1	0.8	0.8	0.8	186.7	1630	1630	0.034125	NaN	NaN	NaN	0	0	0	0				609	2334	TRUE	2540	3844	5500	5500
SPBC31F10.15c	SPBC31F10.15c	1	1	1	>SPBC31F10.15c |atp15||F0-ATPase epsilon subunit |Schizosaccharomyces pombe|chr 2|||Manual	1	1	1	1	17.9	17.9	17.9	7.7406	67	67	0.010382	NaN	NaN	NaN	1	2796000	1427300	1368700				610	2424	TRUE	2646	4053	5818;5819	5818
SPBC32F12.04	SPBC32F12.04	5	5	5	>SPBC32F12.04 |gtb1|tug1|gamma-tubulin Gtb1|Schizosaccharomyces pombe|chr 2|||Manual	1	5	5	5	18.6	18.6	18.6	49.965	446	446	2.7948e-37	0.43748	0.51792	87.931	6	361950000	269720000	92226000				611	2667;3589;3590;3645;3806	True;True;True;True;True	2908;3910;3911;3912;3974;4145	4403;4404;5820;5821;5822;5929;6173	6305;6306;8338;8339;8340;8341;8490;8847;8848	6306;8338;8339;8490;8847	224	377
SPBC32F12.11;SPBC354.12	SPBC32F12.11	27;11	27;11	27;11	>SPBC32F12.11 |tdh1|gpd1|glyceraldehyde-3-phosphate dehydrogenase Tdh1|Schizosaccharomyces pombe|chr 2|||Manual	2	27	27	27	74.4	74.4	74.4	35.869	336	336;335	0	0.48458	0.53245	27.578	60	18635000000	11895000000	6740200000				612	27;400;654;655;841;1665;2037;2038;2067;2068;2084;2085;2627;2634;3163;3450;3451;3455;3459;3460;3461;3466;3564;3630;3631;3706;3723	True;True;True;True;True;True;True;True;True;True;True;True;True;True;True;True;True;True;True;True;True;True;True;True;True;True;True	28;423;693;694;890;1780;2181;2182;2183;2212;2213;2230;2231;2865;2866;2873;3441;3756;3757;3758;3759;3763;3764;3768;3769;3770;3775;3883;3958;3959;4039;4058	53;624;1114;1115;1382;2693;2694;2695;3239;3240;3241;3242;3243;3244;3245;3246;3281;3282;3283;3284;3285;3309;3310;3311;3312;3313;3314;3315;4343;4344;4345;4346;4354;4355;5144;5605;5606;5607;5608;5609;5610;5614;5615;5616;5617;5618;5619;5620;5621;5622;5623;5624;5625;5626;5627;5628;5629;5630;5631;5632;5633;5634;5641;5642;5643;5650;5651;5783;5784;5909;5910;6022;6023;6047	81;906;1597;1598;1986;3876;3877;3878;3879;3880;3881;3882;4650;4651;4652;4653;4654;4655;4656;4657;4658;4659;4660;4661;4662;4663;4664;4665;4718;4719;4720;4721;4722;4723;4755;4756;4757;4758;4759;4760;4761;6217;6218;6219;6220;6221;6222;6223;6232;6233;6234;6235;6236;7334;7335;8030;8031;8032;8033;8034;8035;8036;8037;8038;8039;8040;8041;8045;8046;8047;8048;8049;8050;8051;8052;8053;8054;8055;8056;8057;80…	81;906;1597;1598;1986;3877;4650;4662;4718;4722;4757;4759;6221;6234;7334;8032;8036;8059;8082;8083;8084;8094;8285;8464;8465;8624;8669	225;226;227	130;175;231
SPBC32H8.12c	SPBC32H8.12c	21	21	17	>SPBC32H8.12c |act1|cps8|actin Act1|Schizosaccharomyces pombe|chr 2|||Manual	1	21	21	17	72.3	72.3	58.7	41.764	375	375	0	0.74181	0.90374	23.534	51	22532000000	11484000000	11047000000				613	92;249;316;355;429;457;546;774;904;1049;1071;1510;1693;1703;2122;2176;3038;3278;3355;3807;3808	True;True;True;True;True;True;True;True;True;True;True;True;True;True;True;True;True;True;True;True;True	96;263;264;333;373;453;482;483;576;577;819;820;959;1111;1133;1608;1814;1824;1825;2276;2277;2278;2357;3303;3571;3572;3656;4146;4147;4148	186;396;397;398;503;504;505;557;673;712;713;714;715;941;942;1289;1290;1291;1292;1293;1504;1726;1755;2447;2761;2762;2763;2780;2781;2782;2783;3427;3428;3429;3430;3431;3432;3433;3434;3570;4953;4954;5338;5339;5340;5341;5342;5343;5344;5345;5468;6174;6175;6176;6177;6178;6179	267;268;560;561;562;563;564;565;727;728;729;730;731;801;975;1034;1035;1036;1037;1038;1039;1040;1041;1352;1353;1846;1847;1848;1849;1850;1851;1852;1853;1854;1855;1856;2160;2480;2481;2520;2521;3515;3962;3963;3964;3965;3990;3991;3992;3993;3994;3995;3996;3997;4920;4921;4922;4923;4924;4925;4926;4927;4928;5121;7070;7071;7072;7073;7612;7613;7614;7615;7616;7617;7618;7619;7620;7621;7622;7623;7624;7625;7626…	268;565;730;801;975;1039;1352;1855;2160;2481;2521;3515;3963;3993;4926;5121;7071;7617;7823;8849;8858	37;228;229;230;231;232;233	1;16;82;176;190;283;305
SPBC336.04	SPBC336.04	1	1	1	>SPBC336.04 |cdc6|pol3, pold, mis10|DNA polymerase delta catalytic subunit Cdc6|Schizosaccharomyces pombe|chr 2|||Manual	1	1	1	1	1.3	1.3	1.3	123.57	1086	1086	4.0819e-09	NaN	NaN	NaN	1	14762000	7380100	7381700				614	941	TRUE	996	1555	2232;2233	2232
SPCC569.01c;SPBC337.02c;SPCP20C8.01c	SPCC569.01c;SPBC337.02c;SPCP20C8.01c	1;1;1	1;1;1	1;1;1	>SPCC569.01c |||cell surface glycoprotein |Schizosaccharomyces pombe|chr 3|||Manual;>SPBC337.02c |||cell surface glycoprotein |Schizosaccharomyces pombe|chr 2|||Manual;>SPCP20C8.01c |||cell surface glycoprotein |Schizosaccharomyces pombe|chr 3|||Manual	3	1	1	1	5.9	5.9	5.9	38.275	323	323;305;247	2.4536e-14	NaN	NaN	NaN	1	36570000	24892000	11678000				615	1661	TRUE	1776	2688	3868	3868
SPBC337.05c	SPBC337.05c	11	11	11	>SPBC337.05c |cct8||chaperonin-containing T-complex theta subunit Cct8|Schizosaccharomyces pombe|chr 2|||Manual	1	11	11	11	37.7	37.7	37.7	59.955	546	546	9.0536e-147	0.86153	0.9626	28.756	14	976130000	504010000	472110000				616	147;507;1007;1008;1482;1807;2088;2275;2557;3330;3660	True;True;True;True;True;True;True;True;True;True;True	154;536;1066;1067;1578;1935;2234;2474;2789;3628;3990	257;842;843;1661;1662;2410;2926;3318;3319;3751;3752;4248;5433;5434;5951	366;1222;1223;2380;2381;2382;3461;4199;4764;4765;4766;5372;5373;5374;6079;6080;7767;7768;7769;7770;8525	366;1223;2380;2381;3461;4199;4765;5372;6080;7768;8525
SPBC342.04	SPBC342.04	1	1	1	>SPBC342.04 |rpn1301|rpn13, rpn13a|19S proteasome regulatory subunit Rpn13a|Schizosaccharomyces pombe|chr 2|||Manual	1	1	1	1	4.1	4.1	4.1	31.82	291	291	5.2565e-08	NaN	NaN	NaN	1	21668000	12334000	9333800				617	407	TRUE	430	634	922	922
SPBC354.01	SPBC354.01	2	2	2	>SPBC354.01 |gtp1|SPBC649.06|GTP binding protein Gtp1 |Schizosaccharomyces pombe|chr 2|||Manual	1	2	2	2	9.9	9.9	9.9	40.749	363	363	2.5209e-18	0.67951	0.8005	11.366	2	63668000	39342000	24326000				618	1123;3052	True;True	1195;3319	1852;4976	2676;2677;7100;7101;7102	2677;7102
SPBC354.02c	SPBC354.02c	1	1	1	>SPBC354.02c |sec61||translocon alpha subunit Sec61|Schizosaccharomyces pombe|chr 2|||Manual	1	1	1	1	4.2	4.2	4.2	53.253	479	479	5.3036e-06	NaN	NaN	NaN	1	26481000	18354000	8127600				619	721	TRUE	764	1208	1738	1738
SPBC354.14c	SPBC354.14c	2	2	2	>SPBC354.14c |vac8||vacuolar protein Vac8 |Schizosaccharomyces pombe|chr 2|||Manual	1	2	2	2	5.5	5.5	5.5	60.232	550	550	8.8979e-11	0.87549	1.0681	61.458	2	26484000	14943000	11541000				620	1933;2034	True;True	2069;2177	3098;3235	4434;4644	4434;4644
SPBC359.02	SPBC359.02	2	2	2	>SPBC359.02 |alr2||alanine racemase Alr2 |Schizosaccharomyces pombe|chr 2|||Manual	1	2	2	2	9.5	9.5	9.5	41.147	370	370	5.8833e-25	0.76557	0.7254	35.192	3	286920000	164340000	122580000				621	235;292	True;True	249;307	374;458;459	527;661;662;663	527;662
SPBC359.05	SPBC359.05	1	1	1	>SPBC359.05 |abc3||ABC transporter Abc3, unknown specificity|Schizosaccharomyces pombe|chr 2|||Manual	1	1	1	1	0.6	0.6	0.6	166.61	1465	1465	0.019711	NaN	NaN	NaN	0	0	0	0				622	2981	TRUE	3242	4876	6962	6962
SPBC36.03c	SPBC36.03c	1	1	1	>SPBC36.03c |||spermidine family transporter |Schizosaccharomyces pombe|chr 2|||Manual	1	1	1	1	2	2	2	59.169	538	538	7.913e-07	NaN	NaN	NaN	1	48181000	20426000	27755000				623	1996	TRUE	2135	3190	4580;4581	4581
SPBC36.04	SPBC36.04	1	1	1	>SPBC36.04 |cys11|cys1a|cysteine synthase|Schizosaccharomyces pombe|chr 2|||Manual	1	1	1	1	4	4	4	37.853	351	351	3.4727e-12	NaN	NaN	NaN	1	29450000	15896000	13553000				624	3557	TRUE	3876	5775	8273;8274	8274
SPBC36.05c	SPBC36.05c	1	1	1	>SPBC36.05c |clr6||histone deacetylase |Schizosaccharomyces pombe|chr 2|||Manual	1	1	1	1	3.7	3.7	3.7	46.111	405	405	0.00030529	NaN	NaN	NaN	1	10241000	5680500	4560400				625	2560	TRUE	2793	4253	6089	6089
SPBC36.07	SPBC36.07	4	4	4	>SPBC36.07 |iki3||elongator subunit Iki3 |Schizosaccharomyces pombe|chr 2|||Manual	1	4	4	4	3.4	3.4	3.4	141.61	1253	1253	2.3366e-20	0.77451	0.8878	26.101	3	143080000	74209000	68868000				626	1006;1081;1352;2226	True;True;True;True	1065;1146;1444;2421	1660;1778;2210;3663	2379;2557;3170;5250	2379;2557;3170;5250	234	674
SPBC365.03c	SPBC365.03c	2	2	1	>SPBC365.03c |rpl2101|rpl21, rpl21-1|60S ribosomal protein L21 |Schizosaccharomyces pombe|chr 2|||Manual	1	2	2	1	25.6	25.6	14.4	18.38	160	160	1.2612e-32	NaN	NaN	NaN	1	37086000	25635000	11451000				627	122;3128	True;True	127;3406	225;5097	319;320;7272	320;7272
SPBC365.15	SPBC365.15	1	1	1	>SPBC365.15 |alp4||gamma tubulin complex Spc97/GCP2 subunit Alp4|Schizosaccharomyces pombe|chr 2|||Manual	1	1	1	1	1.8	1.8	1.8	90.157	784	784	7.5595e-06	NaN	NaN	NaN	1	99170000	58378000	40792000				628	875	TRUE	925	1447	2072	2072
SPBC36B7.09	SPBC36B7.09	2	2	2	>SPBC36B7.09 |gcn2|ppk28, SPBP18G5.01|eIF2 alpha kinase Gcn2|Schizosaccharomyces pombe|chr 2|||Manual	1	2	2	2	1.5	1.5	1.5	181.19	1576	1576	4.2731e-13	NaN	NaN	NaN	1	34230000	24109000	10120000				629	1596;2012	True;True	1708;2154	2595;3210	3726;4609	3726;4609
SPBC3B8.03	SPBC3B8.03	1	1	1	>SPBC3B8.03 |||saccharopine dehydrogenase |Schizosaccharomyces pombe|chr 2|||Manual	1	1	1	1	4.9	4.9	4.9	49.938	450	450	5.6763e-13	NaN	NaN	NaN	1	57090000	29958000	27133000				630	332	TRUE	349;350	526;527	761;762;763	761	235	84
SPBC3D6.02	SPBC3D6.02	1	1	1	>SPBC3D6.02 |but2||But2 family protein But2|Schizosaccharomyces pombe|chr 2|||Manual	1	1	1	1	3.8	3.8	3.8	43.625	390	390	3.7644e-06	NaN	NaN	NaN	0	0	0	0				631	3837	TRUE	4179	6221	8917	8917
SPBC3D6.05	SPBC3D6.05	1	1	1	>SPBC3D6.05 |ptp4||phosphatidate cytidylyltransferase Ptp4 |Schizosaccharomyces pombe|chr 2|||Manual	1	1	1	1	3.2	3.2	3.2	24.397	218	218	0.0093558	NaN	NaN	NaN	0	0	0	0				632	3447	TRUE	3753	5602	8027	8027
SPBC3D6.12	SPBC3D6.12	2	2	2	>SPBC3D6.12 |||U3 snoRNA associated protein Dip2 |Schizosaccharomyces pombe|chr 2|||Manual	1	2	2	2	3.4	3.4	3.4	103.43	922	922	6.5356e-08	NaN	NaN	NaN	1	23447000	7298000	16149000				633	1400;2347	True;True	1492;2555	2277;3864	3264;5524	3264;5524
SPBC3E7.05c	SPBC3E7.05c	3	3	3	>SPBC3E7.05c |||human mitofilin ortholog |Schizosaccharomyces pombe|chr 2|||Manual	1	3	3	3	7.1	7.1	7.1	63.214	550	550	3.2559e-23	0.65543	0.7753	12.642	2	63219000	36260000	26959000				634	211;2060;2772	True;True;True	223;2205;3022	345;3271;4550	492;4702;6507;6508	492;4702;6507
SPBC3E7.15c	SPBC3E7.15c	1	1	1	>SPBC3E7.15c |lac1|SPBC4F6.02c, mug83|sphingosine N-acyltransferase Lac1|Schizosaccharomyces pombe|chr 2|||Manual	1	1	1	1	2.1	2.1	2.1	45.335	384	384	0.0099803	NaN	NaN	NaN	1	2771800	1440700	1331200				635	25	TRUE	26	50	77	77
SPBC3E7.16c	SPBC3E7.16c	1	1	1	>SPBC3E7.16c |leu3|SPBC4F6.03c|2-isopropylmalate synthase Leu3|Schizosaccharomyces pombe|chr 2|||Manual	1	1	1	1	3.8	3.8	3.8	64.041	584	584	4.1114e-14	NaN	NaN	NaN	1	51000000	34332000	16668000				636	1114	TRUE	1185	1839	2657	2657
SPBC3F6.02c	SPBC3F6.02c	3	3	3	>SPBC3F6.02c |||3 beta-hydroxysteroid dehydrogenase/delta 5-->4-isomerase |Schizosaccharomyces pombe|chr 2|||Manual	1	3	3	3	10.3	10.3	10.3	38.317	340	340	9.6429e-06	NaN	NaN	NaN	1	17659000	10618000	7040200				637	2496;3346;3641	True;True;True	2724;3646;3969	4157;5458;5923	5957;7807;8482	5957;7807;8482
SPBC3H7.03c	SPBC3H7.03c	6	6	6	>SPBC3H7.03c |||2-oxoglutarate dehydrogenase |Schizosaccharomyces pombe|chr 2|||Manual	1	6	6	6	9.1	9.1	9.1	114.16	1009	1009	1.2341e-63	0.47564	0.58414	48.325	7	651170000	396260000	254910000				638	1318;1319;2795;2916;3007;3149	True;True;True;True;True;True	1405;1406;3045;3169;3269;3427	2164;2165;4580;4770;4771;4909;5129	3109;3110;3111;6545;6546;6807;6808;7007;7008;7313;7314	3109;3111;6545;6808;7008;7313
SPBC3H7.05c	SPBC3H7.05c	1	1	1	>SPBC3H7.05c |||mitochondrial Membrane Bound O-Acyl Transferase |Schizosaccharomyces pombe|chr 2|||Manual	1	1	1	1	3.4	3.4	3.4	41.737	357	357	0.0019866	NaN	NaN	NaN	1	11827000	7755100	4072000				639	3700	TRUE	4032	6011	8605	8605
SPBC3H7.15	SPBC3H7.15	2	1	1	>SPBC3H7.15 |hhp1||serine/threonine protein kinase Hhp1|Schizosaccharomyces pombe|chr 2|||Manual	1	2	1	1	6.6	3.3	3.3	42.45	365	365	2.6707e-10	NaN	NaN	NaN	1	79633000	30251000	49383000				640	1326;3304	True;False	1413;3600	2174;5388	3122;7688	3122;7688
SPBC4.03c	SPBC4.03c	3	3	3	>SPBC4.03c |||COPII-coated vesicle component Sfb3 |Schizosaccharomyces pombe|chr 2|||Manual	1	3	3	3	6.2	6.2	6.2	98.068	891	891	9.0518e-13	0.74133	0.90644	22.492	3	76838000	39464000	37374000				641	1844;2175;2321	True;True;True	1972;2356;2521	2981;3569;3810	4285;5120;5449	4285;5120;5449
SPBC4.07c	SPBC4.07c	4	4	4	>SPBC4.07c |rpt2|mts2|19S proteasome regulatory subunit Rpt2|Schizosaccharomyces pombe|chr 2|||Manual	1	4	4	4	11.4	11.4	11.4	50.06	448	448	1.5328e-118	0.67683	0.85089	20.744	2	181900000	94746000	87153000				642	161;162;233;3225	True;True;True;True	170;171;247;3510	276;277;372;5251	391;392;393;525;7488	392;393;525;7488	236	315
SPBC405.01	SPBC405.01	2	2	2	>SPBC405.01 |ade1|min4, SPBC4C3.02c|phosphoribosylamine-glycine ligase|Schizosaccharomyces pombe|chr 2|||Manual	1	2	2	2	3.2	3.2	3.2	85.23	788	788	1.3836e-18	0.77211	0.94034	3.4286	2	90088000	42961000	47126000				643	1497;2125	True;True	1593;2281	2429;3438	3491;4932	3491;4932
SPBC405.06	SPBC405.06	1	1	1	>SPBC405.06 |||DNAJ protein Xdj1 |Schizosaccharomyces pombe|chr 2|||Manual	1	1	1	1	2.9	2.9	2.9	46.126	413	413	3.5581e-07	NaN	NaN	NaN	1	27696000	12749000	14947000				644	1413	TRUE	1505	2295	3289	3289
SPBC405.07;SPCC970.05	SPBC405.07;SPCC970.05	4;4	4;4	4;4	>SPBC405.07 |rpl3602|rpl36-2, rpl36|60S ribosomal protein L36|Schizosaccharomyces pombe|chr 2|||Manual;>SPCC970.05 |rpl3601|rpl36-1|60S ribosomal protein L36|Schizosaccharomyces pombe|chr 3|||Manual	2	4	4	4	33.3	33.3	33.3	11.258	99	99;99	3.4299e-30	0.73198	0.90894	13.362	6	760050000	384030000	376020000				645	171;251;920;2632	True;True;True;True	181;266;975;2871	290;291;401;1528;1529;4351	410;411;412;570;571;2196;2197;2198;2199;6228	411;570;2199;6228
SPBC409.18	SPBC409.18	1	1	1	>SPBC409.18 |||phosphatidic acid phosphatase |Schizosaccharomyces pombe|chr 2|||Manual	1	1	1	1	6.5	6.5	6.5	31.192	279	279	0.0034007	NaN	NaN	NaN	1	12569000	6506900	6062000				646	3659	TRUE	3989	5950	8524	8524
SPBC428.02c	SPBC428.02c	3	3	3	>SPBC428.02c |eca39|SPBC582.12c|branched chain amino acid aminotransferase Eca39|Schizosaccharomyces pombe|chr 2|||Manual	1	3	3	3	8	8	8	47.855	427	427	5.7991e-22	0.97962	1.1972	40.817	3	95858000	43139000	52720000				647	1416;1417;1857	True;True;True	1508;1509;1986	2298;2299;2996	3292;3293;3294;3295;4304	3293;3295;4304
SPBC428.04	SPBC428.04	1	1	1	>SPBC428.04 |apq12||nuclear membrane organization protein Apq12 |Schizosaccharomyces pombe|chr 2|||Manual	1	1	1	1	10.4	10.4	10.4	12.762	115	115	1.3915e-07	NaN	NaN	NaN	1	11271000	6652700	4618700				648	2881	TRUE	3132	4714	6725	6725
SPBC428.05c	SPBC428.05c	3	3	3	>SPBC428.05c |arg12||argininosuccinate synthase |Schizosaccharomyces pombe|chr 2|||Manual	1	3	3	3	12.9	12.9	12.9	46.084	410	410	3.6668e-06	0.78839	0.90698	33.552	2	54231000	28964000	25267000				649	220;667;2052	True;True;True	233;706;2197	356;1131;3262	505;1623;4690	505;1623;4690
SPBC428.11	SPBC428.11	1	1	1	>SPBC428.11 ||met17|homocysteine synthase Met17|Schizosaccharomyces pombe|chr 2|||Manual	1	1	1	1	3	3	3	46.408	429	429	0.011827	NaN	NaN	NaN	1	63076000	23132000	39944000				650	329	TRUE	346	523	756	756
SPBC428.14	SPBC428.14	1	1	1	>SPBC428.14 |||1-acylglycerol-3-phosphate acyltransferase |Schizosaccharomyces pombe|chr 2|||Manual	1	1	1	1	2.9	2.9	2.9	41.354	350	350	0.00057876	NaN	NaN	NaN	1	38824000	11356000	27468000				651	1715	TRUE	1837	2797	4016	4016
SPBC428.19c	SPBC428.19c	1	1	1	>SPBC428.19c |utp15||U3 snoRNP protein Utp15 |Schizosaccharomyces pombe|chr 2|||Manual	1	1	1	1	3.2	3.2	3.2	54.111	494	494	7.5834e-12	NaN	NaN	NaN	1	27522000	16445000	11078000				652	635	TRUE	673	1089	1560	1560
SPBC428.20c	SPBC428.20c	2	2	2	>SPBC428.20c |alp6|SPBC902.01c|gamma tubulin complex Spc98/GCP3 subunit Alp6|Schizosaccharomyces pombe|chr 2|||Manual	1	2	2	2	2.2	2.2	2.2	95.996	832	832	1.6815e-14	0.53914	0.67584	2.1265	2	48325000	31856000	16469000				653	1212;2587	True;True	1286;2823	1978;4293	2846;6151	2846;6151
SPBC4B4.08	SPBC4B4.08	1	1	1	>SPBC4B4.08 |ght2||hexose transporter Ght2|Schizosaccharomyces pombe|chr 2|||Manual	1	1	1	1	2.4	2.4	2.4	58.845	531	531	0.00011305	NaN	NaN	NaN	1	16452000	14757000	1695300				654	3780	TRUE	4119	6138	8793	8793
SPBC4B4.09	SPBC4B4.09	1	1	1	>SPBC4B4.09 |usp105|prp39|U1 snRNP-associated protein Usp105|Schizosaccharomyces pombe|chr 2|||Manual	1	1	1	1	1.8	1.8	1.8	71.246	612	612	8.5658e-07	NaN	NaN	NaN	1	30338000	16920000	13417000				655	1489	TRUE	1585	2418	3474;3475	3475
SPBC4C3.03	SPBC4C3.03	1	1	1	>SPBC4C3.03 |||homoserine kinase |Schizosaccharomyces pombe|chr 2|||Manual	1	1	1	1	4.1	4.1	4.1	36.608	338	338	0.00018545	NaN	NaN	NaN	1	49927000	33112000	16815000				656	166	TRUE	175	282	401;402	402
SPBC4C3.05c	SPBC4C3.05c	7	7	7	>SPBC4C3.05c |nuc1|rpa1|DNA-directed RNA polymerase I complex large subunit Nuc1|Schizosaccharomyces pombe|chr 2|||Manual	1	7	7	7	7	7	7	189.24	1689	1689	1.7587e-30	0.96331	1.0198	24.056	9	548450000	249860000	298590000				657	686;921;1880;2209;2453;2502;3209	True;True;True;True;True;True;True	726;976;2009;2403;2679;2730;3491	1155;1530;3023;3638;4097;4098;4164;4165;5213	1659;2200;4335;5214;5881;5882;5967;5968;7427	1659;2200;4335;5214;5881;5967;7427
SPBC4C3.07	SPBC4C3.07	1	1	1	>SPBC4C3.07 |||translation initiation factor eIF3f|Schizosaccharomyces pombe|chr 2|||Manual	1	1	1	1	3.6	3.6	3.6	33.251	302	302	0.0001893	NaN	NaN	NaN	1	35298000	17098000	18200000				658	2982	TRUE	3243	4877	6963	6963
SPBC4F6.04	SPBC4F6.04	4	1	1	>SPBC4F6.04 |rpl2502|rpl25b, rpl23a-2|60S ribosomal protein L25 |Schizosaccharomyces pombe|chr 2|||Manual	1	4	1	1	40.4	17.7	17.7	15.767	141	141	3.8354e-60	NaN	NaN	NaN	1	39026000	19891000	19135000				659	1534;1699;1997;3024	False;False;False;True	1635;1820;2136;3289	2491;2492;2493;2775;2776;3191;3192;4937	3582;3583;3584;3585;3586;3985;3986;4582;4583;4584;4585;7048;7049	3584;3985;4583;7048
SPBC4F6.07c	SPBC4F6.07c	2	2	2	>SPBC4F6.07c |||ATP-dependent RNA helicase Mak5 |Schizosaccharomyces pombe|chr 2|||Manual	1	2	2	2	4.5	4.5	4.5	73.249	648	648	1.7056e-08	0.81287	0.9355	8.2589	2	52521000	24141000	28379000				660	371;2097	True;True	389;2244	573;3335	827;828;4794	827;4794
SPBC4F6.14	SPBC4F6.14	2	2	2	>SPBC4F6.14 |||RNA-binding protein |Schizosaccharomyces pombe|chr 2|||Manual	1	2	2	2	5.5	5.5	5.5	77.033	674	674	1.2433e-06	0.69182	0.84424	25.585	3	124800000	71009000	53790000				661	1146;2313	True;True	1218;2513	1879;3801;3802	2715;5439;5440	2715;5440
SPBC4F6.18c	SPBC4F6.18c	2	2	2	>SPBC4F6.18c |arf1||ADP-ribosylation factor, Arf family Arf1|Schizosaccharomyces pombe|chr 2|||Manual	1	2	2	2	21.1	21.1	21.1	20.618	180	180	1.4242e-39	1.5445	1.9349	43.999	2	111350000	44220000	67129000				662	1143;2158	True;True	1215;2329;2330	1874;3506;3507	2708;5024;5025;5026	2708;5026	237	110
SPBC530.03c	SPBC530.03c	1	1	1	>SPBC530.03c |bag102|bag1-b|BAG family molecular chaperone regulator Bag102 |Schizosaccharomyces pombe|chr 2|||Manual	1	1	1	1	5.8	5.8	5.8	23.325	206	206	3.265e-07	NaN	NaN	NaN	1	21149000	13310000	7838800				663	1938	TRUE	2074	3104;3105	4446;4447	4446
SPBC530.05	SPBC530.05	4	4	4	>SPBC530.05 |||transcription factor |Schizosaccharomyces pombe|chr 2|||Manual	1	4	4	4	8.4	8.4	8.4	85.198	762	762	1.0866e-34	1.2733	1.4602	14.285	3	84132000	38103000	46029000				664	1456;1946;3044;3728	True;True;True;True	1551;2084;3311;4063	2352;3124;4963;6052;6053	3375;4482;7083;7084;8674;8675	3375;4482;7084;8675
SPBC530.10c	SPBC530.10c	6	6	6	>SPBC530.10c |anc1||mitochondrial adenine nucleotide carrier Anc1|Schizosaccharomyces pombe|chr 2|||Manual	1	6	6	6	22.7	22.7	22.7	35.02	322	322	7.2899e-95	0.68356	0.71549	17.972	6	1109300000	563760000	545510000				665	857;1012;1866;3047;3732;3733	True;True;True;True;True;True	906;1071;1995;3314;4067;4068	1424;1668;3006;4967;6057;6058;6059	2042;2043;2389;2390;4314;7089;8680;8681;8682;8683;8684	2042;2389;4314;7089;8680;8683	238	61
SPBC543.02c	SPBC543.02c	1	1	1	>SPBC543.02c |||DNAJ/TPR domain protein DNAJC7 family|Schizosaccharomyces pombe|chr 2|||Manual	1	1	1	1	4.8	4.8	4.8	53.304	476	476	2.7164e-10	NaN	NaN	NaN	1	38972000	27046000	11926000				666	1830	TRUE	1958	2964	4263	4263
SPBC543.04	SPBC543.04	1	1	1	>SPBC543.04 |||Npr2/3 complex subunit Npr3 |Schizosaccharomyces pombe|chr 2|||Manual	1	1	1	1	1.7	1.7	1.7	66.868	585	585	0.0061843	NaN	NaN	NaN	0	0	0	0				667	132	TRUE	138	237	336	336
SPBC543.06c	SPBC543.06c	1	1	1	>SPBC543.06c |dbp8||ATP-dependent RNA helicase Dbp8 |Schizosaccharomyces pombe|chr 2|||Manual	1	1	1	1	3.1	3.1	3.1	50.771	453	453	1.085e-12	NaN	NaN	NaN	1	19884000	13265000	6619400				668	467	TRUE	494	731;732	1070;1071	1071
SPBC56F2.02;SPCC1682.14	SPBC56F2.02;SPCC1682.14	4;4	4;4	4;4	>SPBC56F2.02 |rpl1901|rpl19-1|60S ribosomal protein L19|Schizosaccharomyces pombe|chr 2|||Manual;>SPCC1682.14 |rpl1902|rpl19-2|60S ribosomal protein L19|Schizosaccharomyces pombe|chr 3|||Manual	2	4	4	4	22.3	22.3	22.3	22.723	193	193;193	6.7405e-15	0.68774	0.83843	13.141	3	44875000	25818000	19057000				669	198;604;1184;3665	True;True;True;True	209;640;1256;3995	327;1044;1932;5956	463;464;1506;2786;8531	463;1506;2786;8531
SPBC56F2.04	SPBC56F2.04	5	5	5	>SPBC56F2.04 |utp20||U3 snoRNP protein Utp20 |Schizosaccharomyces pombe|chr 2|||Manual	1	5	5	5	2.6	2.6	2.6	285.22	2493	2493	4.8766e-40	0.73045	0.89207	11.679	3	57542000	31602000	25939000				670	648;720;1424;2048;3143	True;True;True;True;True	687;763;1517;2193;3421	1107;1207;2310;3257;5121	1588;1737;3311;4684;7302	1588;1737;3311;4684;7302
SPBC56F2.07c	SPBC56F2.07c	2	2	2	>SPBC56F2.07c |||ribosome biogenesis factor recycling AAA family ATPase |Schizosaccharomyces pombe|chr 2|||Manual	1	2	2	2	4.2	4.2	4.2	88.471	809	809	1.2406e-23	0.83775	0.93598	11.239	2	39379000	24986000	14393000				671	309;3547	True;True	326;3865	494;5762	716;717;8256	716;8256
SPBC56F2.09c	SPBC56F2.09c	6	6	6	>SPBC56F2.09c |arg5||arginine specific carbamoyl-phosphate synthase subunit Arg5 |Schizosaccharomyces pombe|chr 2|||Manual	1	6	6	6	26.5	26.5	26.5	45.661	415	415	3.7129e-71	0.8298	1.004	12.473	8	994000000	556400000	437600000				672	164;305;874;2241;2513;3816	True;True;True;True;True;True	173;322;923;924;2437;2742;4157	279;487;488;1444;1445;1446;3703;4183;4184;6191	396;704;705;706;2069;2070;2071;5301;5995;5996;8877;8878	396;705;2069;5301;5996;8878	239	393
SPBC56F2.12	SPBC56F2.12	2	2	2	>SPBC56F2.12 |ilv5||acetohydroxyacid reductoisomerase |Schizosaccharomyces pombe|chr 2|||Manual	1	2	2	2	8.9	8.9	8.9	45.188	404	404	9.454e-48	0.95275	1.0921	28.192	5	167640000	86563000	81074000				673	586;991	True;True	618;1049;1050	1012;1634;1635;1636;1637;1638	1456;2339;2340;2341;2342;2343;2344;2345	1456;2345	240	149
SPBC577.02	SPBC577.02	6	4	4	>SPBC577.02 |rpl3801|rpl38-1|60S ribosomal protein L38 |Schizosaccharomyces pombe|chr 2|||Manual	1	6	4	4	55.4	39.2	39.2	8.4919	74	74	2.5106e-28	0.61968	0.7592	28.548	4	314130000	173040000	141090000				674	2412;2442;2455;2525;3795;3796	True;True;True;True;False;False	2634;2666;2681;2754;4134;4135	4035;4080;4100;4101;4197;6154;6155;6156;6157	5788;5856;5884;5885;5886;5887;6016;8817;8818;8819;8820;8821;8822;8823;8824	5788;5856;5887;6016;8817;8823
SPBC577.06c	SPBC577.06c	4	4	4	>SPBC577.06c |stt4||1-phosphatidylinositol 4-kinase Stt4 |Schizosaccharomyces pombe|chr 2|||Manual	1	4	4	4	2.9	2.9	2.9	213.96	1877	1877	4.3428e-27	0.57448	0.67884	39.577	4	84643000	51668000	32975000				675	1366;2430;2848;2867	True;True;True;True	1458;2653;3098;3118	2229;4060;4674;4675;4698	3196;5828;6670;6671;6700	3196;5828;6671;6700
SPBC582.06c	SPBC582.06c	1	1	1	>SPBC582.06c |mcp6|hrs1, mug3|horsetail movement protein Hrs1/Mcp6|Schizosaccharomyces pombe|chr 2|||Manual	1	1	1	1	6.1	6.1	6.1	38.103	327	327	2.1788e-15	NaN	NaN	NaN	0	0	0	0				676	3095	TRUE	3369	5043	7195	7195
SPBC582.07c	SPBC582.07c	1	1	1	>SPBC582.07c |rpn7||19S proteasome regulatory subunit Rpn7|Schizosaccharomyces pombe|chr 2|||Manual	1	1	1	1	4.6	4.6	4.6	46.68	409	409	2.4393e-08	0.75136	0.91368	13.971	2	74299000	48160000	26139000				677	179	TRUE	189	299;300	424;425	424
SPBC646.05c	SPBC646.05c	1	1	1	>SPBC646.05c |erg9||squalene synthase Erg9 |Schizosaccharomyces pombe|chr 2|||Manual	1	1	1	1	4.8	4.8	4.8	53.321	460	460	1.3531e-10	NaN	NaN	NaN	1	40934000	25552000	15381000				678	1707	TRUE	1829	2787	4002;4003	4002
SPBC646.07c	SPBC646.07c	8	8	8	>SPBC646.07c |||enoyl reductase |Schizosaccharomyces pombe|chr 2|||Manual	1	8	8	8	26.1	26.1	26.1	34.64	295	295	2.9609e-32	0.92975	1.1008	7.9228	8	280210000	133900000	146310000				679	628;784;1347;1540;2797;2828;3750;3784	True;True;True;True;True;True;True;True	666;830;1436;1644;1645;3047;3078;4086;4123	1080;1305;2202;2505;2506;2507;4582;4651;6087;6142	1549;1550;1879;3160;3601;3602;3603;3604;6548;6641;6642;8723;8799	1550;1879;3160;3604;6548;6641;8723;8799	241	290
SPBC646.09c	SPBC646.09c	1	1	1	>SPBC646.09c |int6|yin6|eIF3e subunit Int6|Schizosaccharomyces pombe|chr 2|||Manual	1	1	1	1	4.4	4.4	4.4	57.114	501	501	0.021798	NaN	NaN	NaN	0	0	0	0				680	645	TRUE	684	1103	1584	1584
SPBC646.10c	SPBC646.10c	26	26	26	>SPBC646.10c |||U3 snoRNP protein Nop56 |Schizosaccharomyces pombe|chr 2|||Manual	1	26	26	26	61.2	61.2	61.2	55.388	497	497	2.4408e-247	1.1529	1.3017	21.981	41	3969100000	1714800000	2254300000				681	49;259;375;698;911;1189;1190;1594;1618;2141;2172;2201;2202;2229;2361;2479;2492;2493;2542;2687;3171;3172;3279;3595;3599;3737	True;True;True;True;True;True;True;True;True;True;True;True;True;True;True;True;True;True;True;True;True;True;True;True;True;True	52;274;394;741;966;1261;1262;1706;1731;2305;2306;2351;2352;2394;2395;2424;2572;2573;2706;2720;2721;2771;2931;3449;3450;3573;3917;3925;3926;4072	84;410;411;578;1180;1511;1937;1938;1939;2593;2625;3471;3472;3473;3474;3560;3561;3562;3563;3627;3628;3666;3889;3890;4130;4131;4153;4154;4218;4219;4440;5155;5156;5157;5158;5346;5827;5828;5855;5856;6063;6064	120;121;122;582;583;584;585;835;836;1696;1697;2169;2792;2793;2794;2795;2796;3722;3723;3770;4973;4974;4975;4976;4977;4978;5109;5110;5111;5112;5197;5198;5199;5254;5567;5568;5569;5570;5926;5927;5952;5953;5954;6042;6043;6044;6361;7353;7354;7355;7356;7357;7358;7628;8346;8347;8397;8398;8689;8690;8691;8692	121;583;835;1697;2169;2792;2796;3723;3770;4978;5110;5198;5199;5254;5570;5926;5953;5954;6044;6361;7355;7357;7628;8347;8397;8689	242;243;244;245	191;255;292;424
SPBC646.11	SPBC646.11	10	10	10	>SPBC646.11 |cct6||chaperonin-containing T-complex zeta subunit Cct6|Schizosaccharomyces pombe|chr 2|||Manual	1	10	10	10	29.7	29.7	29.7	58.548	535	535	3.8449e-220	0.763	0.91352	22.86	7	790140000	420980000	369150000				682	529;894;1101;2163;2164;2216;2609;2664;3120;3513	True;True;True;True;True;True;True;True;True;True	559;946;1166;1167;2337;2338;2410;2847;2905;3397;3829	915;1486;1810;1811;1812;3516;3517;3518;3647;4321;4322;4400;5087;5088;5721	1321;1322;2130;2131;2609;2610;2611;5038;5039;5040;5225;6186;6187;6188;6300;6301;6302;7259;7260;8198	1322;2130;2610;5039;5040;5225;6187;6301;7259;8198	246	504
SPBC646.12c	SPBC646.12c	1	1	1	>SPBC646.12c |gap1|src1, sar1|GTPase activating protein Gap1|Schizosaccharomyces pombe|chr 2|||Manual	1	1	1	1	2.1	2.1	2.1	87.539	766	766	0.0038663	NaN	NaN	NaN	0	0	0	0				683	3560	TRUE	3879	5778	8277	8277
SPBC646.16	SPBC646.16	1	1	1	>SPBC646.16 |||20S proteasome component alpha 1 |Schizosaccharomyces pombe|chr 2|||Manual	1	1	1	1	7.4	7.4	7.4	26.539	244	244	6.3692e-16	NaN	NaN	NaN	1	62809000	24463000	38346000				684	3522	TRUE	3838	5731	8210;8211	8210
SPBC649.02	SPBC649.02	6	6	2	>SPBC649.02 |rps1902|rps19-2, rps19|40S ribosomal protein S19 |Schizosaccharomyces pombe|chr 2|||Manual	1	6	6	2	37.1	37.1	16.1	16.062	143	143	3.338e-77	0.89658	1.0488	31.47	6	533480000	270740000	262730000				685	117;486;559;2111;2195;3126	True;True;True;True;True;True	122;513;590;2260;2385;2386;3404	218;754;755;756;965;3359;3614;3615;5095	307;308;1103;1104;1105;1389;4823;5174;5175;5176;7268;7269	308;1103;1389;4823;5176;7268	199	28
SPBC651.01c	SPBC651.01c	2	2	2	>SPBC651.01c |nog1|SPBC725.18c|GTP binding protein Nog1 |Schizosaccharomyces pombe|chr 2|||Manual	1	2	2	2	6.2	6.2	6.2	72.798	642	642	1.5886e-34	0.71779	0.87962	21.794	3	236790000	128900000	107880000				686	1930;2269	True;True	2066;2468	3093;3744;3745	4428;5362;5363;5364;5365	4428;5364
SPBC660.11	SPBC660.11	1	1	1	>SPBC660.11 |tcg1|mug187|single-stranded telomeric binding protein Tgc1|Schizosaccharomyces pombe|chr 2|||Manual	1	1	1	1	4.3	4.3	4.3	38.002	349	349	1.547e-08	NaN	NaN	NaN	0	0	0	0				687	856	TRUE	905	1423	2041	2041
SPBC660.16	SPBC660.16	7	7	7	>SPBC660.16 |||phosphogluconate dehydrogenase, decarboxylating|Schizosaccharomyces pombe|chr 2|||Manual	1	7	7	7	28	28	28	53.679	492	492	4.4733e-50	0.99027	1.1337	28.106	7	501370000	262230000	239140000				688	103;431;2481;2800;3628;3707;3745	True;True;True;True;True;True;True	107;455;2708;3050;3956;4040;4080	200;675;4133;4134;4586;5906;6024;6076	287;978;979;5929;5930;6555;6556;8461;8627;8709	287;978;5929;6556;8461;8627;8709
SPBC685.06	SPBC685.06	2	1	1	>SPBC685.06 |rps001|rps0-1, rpsa-1, rps0|40S ribosomal protein S0A |Schizosaccharomyces pombe|chr 2|||Manual	1	2	1	1	8.2	4.1	4.1	31.759	292	292	8.9767e-10	0.62899	0.76768	11.259	2	26895000	15324000	11571000				689	803;1602	False;True	849;1714	1330;2605;2606	1918;1919;3739;3740	1918;3739
SPBC685.07c;SPCC74.05	SPBC685.07c;SPCC74.05	3;2	3;2	3;2	>SPBC685.07c |rpl2701|rpl27-1|60S ribosomal protein L27|Schizosaccharomyces pombe|chr 2|||Manual;>SPCC74.05 |rpl2702|rpl27-2|60S ribosomal protein L27 |Schizosaccharomyces pombe|chr 3|||Manual	2	3	3	3	39	39	39	15.389	136	136;136	2.6137e-27	0.66971	0.85901	21.433	4	255920000	154480000	101440000				690	2665;2746;3718	True;True;True	2906;2993;4053	4401;4519;6041;6042	6303;6465;6466;8657;8658;8659	6303;6465;8659
SPBC691.03c	SPBC691.03c	3	3	3	>SPBC691.03c |apl3||AP-2 adaptor complex subunit Alp3 |Schizosaccharomyces pombe|chr 2|||Manual	1	3	3	3	3.5	3.5	3.5	100.08	878	878	4.9185e-12	1.3632	1.6104	57.402	2	68918000	31000000	37917000				691	373;2651;3511	True;True;True	392;2891;3827	576;4379;5719	833;6272;8195;8196	833;6272;8195
SPBC691.04	SPBC691.04	1	1	1	>SPBC691.04 |||mitochondrial ATP-dependent RNA helicase Mss116 |Schizosaccharomyces pombe|chr 2|||Manual	1	1	1	1	3.4	3.4	3.4	59.449	535	535	0.0077463	NaN	NaN	NaN	0	0	0	0				692	2938	TRUE	3196	4816	6886	6886
SPBC6B1.05c	SPBC6B1.05c	1	1	1	>SPBC6B1.05c |atg7||ubiquitin-like conjugating enzyme Atg7|Schizosaccharomyces pombe|chr 2|||Manual	1	1	1	1	1.1	1.1	1.1	73.362	649	649	0.025208	2.5474	2.9179	8.7776	2	31486000	10212000	21274000				693	2409	TRUE	2631	4031;4032	5784;5785	5785
SPBC6B1.08c	SPBC6B1.08c	1	1	1	>SPBC6B1.08c |ofd1||2-oxoglutarate and Fe|Schizosaccharomyces pombe|chr 2|||Manual	1	1	1	1	2.1	2.1	2.1	59.177	515	515	2.9685e-07	NaN	NaN	NaN	0	0	0	0				694	3695	TRUE	4027	6004;6005	8598;8599	8599
SPBC713.02c	SPBC713.02c	1	1	1	>SPBC713.02c |ubp15|ubpD, ubp21|ubiquitin C-terminal hydrolase Ubp15|Schizosaccharomyces pombe|chr 2|||Manual	1	1	1	1	1.1	1.1	1.1	130.83	1129	1129	3.8885e-05	NaN	NaN	NaN	1	22938000	13962000	8976000				695	2652	TRUE	2892	4380;4381	6273;6274	6274
SPBC713.03	SPBC713.03	1	1	1	>SPBC713.03 |||mitochondrial D-lactate dehydrogenase, cytochrome |Schizosaccharomyces pombe|chr 2|||Manual	1	1	1	1	3.8	3.8	3.8	58.472	526	526	0.00034527	0.83306	1.0109	24.28	2	113470000	63938000	49532000				696	2617	TRUE	2855	4331;4332	6203;6204	6203
SPBC725.09c	SPBC725.09c	2	2	2	>SPBC725.09c |hob3||BAR adaptor protein Hob3|Schizosaccharomyces pombe|chr 2|||Manual	1	2	2	2	14.4	14.4	14.4	30.094	264	264	6.1601e-15	0.7969	0.97055	15.01	2	54157000	28337000	25820000				697	651;1162	True;True	690;1234	1111;1900	1593;2742	1593;2742
SPBC725.16	SPBC725.16	4	4	4	>SPBC725.16 |res1|sct1|MBF transcription factor complex subunit Res1|Schizosaccharomyces pombe|chr 2|||Manual	1	4	4	4	11.5	11.5	11.5	72.441	637	637	1.6746e-53	1.0652	1.2335	13.398	2	96877000	39652000	57226000				698	1357;2041;2184;2495	True;True;True;True	1449;2186;2369;2723	2218;3249;3587;4156	3183;4670;4671;5144;5956	3183;4671;5144;5956	247	159
SPBC776.01	SPBC776.01	1	1	1	>SPBC776.01 |rpl29||60S ribosomal protein L29|Schizosaccharomyces pombe|chr 2|||Manual	1	1	1	1	18	18	18	7.2021	61	61	8.169e-07	NaN	NaN	NaN	1	18424000	8455500	9968500				699	642	TRUE	680	1097	1573;1574	1573
SPBC776.04	SPBC776.04	4	4	4	>SPBC776.04 |sec2302|sec23-b|COPII cargo receptor subunit Sec23b |Schizosaccharomyces pombe|chr 2|||Manual	1	4	4	4	7.7	7.7	7.7	85.381	765	765	5.0234e-19	0.75919	0.9259	44.986	2	24429000	13702000	10727000				700	319;1168;1887;3625	True;True;True;True	336;1240;2016;3953	508;509;1906;3032;5903	734;735;2753;4347;8457	735;2753;4347;8457
SPBC776.08c	SPBC776.08c	2	2	2	>SPBC776.08c |||Nrap |Schizosaccharomyces pombe|chr 2|||Manual	1	2	2	2	2.8	2.8	2.8	126.08	1097	1097	7.6619e-11	0.59461	0.72459	6.0677	2	64095000	35567000	28527000				701	954;3469	True;True	1010;3778	1572;5656	2256;2257;8105	2257;8105
SPBC776.09	SPBC776.09	4	4	4	>SPBC776.09 |ste13||ATP-dependent RNA helicase Ste13|Schizosaccharomyces pombe|chr 2|||Manual	1	4	4	4	15.5	15.5	15.5	54.794	485	485	1.1295e-41	0.892	1.0601	15.278	4	199700000	102950000	96749000				702	58;1029;1094;2457	True;True;True;True	61;1089;1159;2683	95;1692;1799;4103	140;141;2427;2593;5889;5890;5891	141;2427;2593;5889
SPBC776.11	SPBC776.11	3	1	1	>SPBC776.11 |rpl2801|rpl28-1|60S ribosomal protein L27/L28|Schizosaccharomyces pombe|chr 2|||Manual	1	3	1	1	35.1	14.9	14.9	16.685	148	148	9.1015e-26	NaN	NaN	NaN	1	113910000	59078000	54827000				703	2350;2371;2742	True;False;False	2558;2583;2989	3868;3905;3906;3907;4515	5531;5532;5594;5595;5596;5597;6460	5532;5595;6460
SPBC776.15c	SPBC776.15c	5	5	5	>SPBC776.15c |kgd2||dihydrolipoamide S-succinyltransferase, e2 component of oxoglutarate dehydrogenase complex Kdg2 |Schizosaccharomyces pombe|chr 2|||Manual	1	5	5	5	20.4	20.4	20.4	48.964	452	452	8.1552e-137	0.5983	0.54802	21.347	13	2319800000	1456600000	863210000				704	28;602;1222;2206;3248	True;True;True;True;True	29;637;638;1296;1297;2399;2400;3539	54;1039;1040;1041;1042;1990;1991;1992;3632;3633;3634;3635;5294;5295;5296	82;1500;1501;1502;1503;1504;2861;2862;2863;2864;2865;2866;5203;5204;5205;5206;5207;5208;5209;5210;5211;7549;7550;7551;7552	82;1502;2864;5210;7551	248;249;250;251	279;338;415;416
SPBC776.17	SPBC776.17	1	1	1	>SPBC776.17 |||rRNA processing protein Rrp7 |Schizosaccharomyces pombe|chr 2|||Manual	1	1	1	1	5.5	5.5	5.5	27.974	238	238	1.0098e-06	NaN	NaN	NaN	1	59981000	32940000	27041000				705	1466	TRUE	1561	2363	3392;3393	3392
SPBC800.03	SPBC800.03	1	1	1	>SPBC800.03 |clr3||histone deacetylase |Schizosaccharomyces pombe|chr 2|||Manual	1	1	1	1	1.7	1.7	1.7	76.791	687	687	1.8138e-06	NaN	NaN	NaN	1	27083000	13657000	13426000				706	333	TRUE	351	528	764	764
SPBC800.04c	SPBC800.04c	3	3	2	>SPBC800.04c |rpl4301|rpl43-1, rpl43, rpl37a-1|60S ribosomal protein L37a |Schizosaccharomyces pombe|chr 2|||Manual	1	3	3	2	27.7	27.7	20.2	10.422	94	94	5.6473e-33	0.83807	1.0272	25.245	4	217770000	121130000	96643000				707	1610;1984;3479	True;True;True	1723;2123;3788	2617;3176;5671;5672	3757;3758;3759;4561;8128;8129;8130;8131	3757;4561;8129
SPBC800.05c	SPBC800.05c	6	2	2	>SPBC800.05c |atb2|tub1, alp2, ban5|tubulin alpha 2|Schizosaccharomyces pombe|chr 2|||Manual	1	6	2	2	20.7	7.6	7.6	50.535	449	449	8.4062e-52	0.58879	0.75521	23.377	3	127360000	76305000	51059000				708	311;889;1238;1773;2805;3161	False;True;True;False;False;False	328;940;1314;1900;3055;3439	497;1476;2019;2020;2882;2883;4596;4597;5142	721;2114;2904;2905;4137;4138;6569;6570;6571;7332	721;2114;2904;4137;6569;7332
SPBC800.06	SPBC800.06	2	2	2	>SPBC800.06 |brx1||ribosome biogenesis protein Brx1 |Schizosaccharomyces pombe|chr 2|||Manual	1	2	2	2	11.2	11.2	11.2	33.899	295	295	9.0969e-13	0.78678	0.9829	11.391	2	73334000	43181000	30154000				709	995;3373	True;True	1054;3675	1644;5494	2352;7865	2352;7865
SPBC83.02c	SPBC83.02c	2	1	1	>SPBC83.02c |rpl4302|rpl43-2, rpl43, rpl37a-2|60S ribosomal protein L37a |Schizosaccharomyces pombe|chr 2|||Manual	1	2	1	1	26.6	19.1	19.1	10.38	94	94	1.2207e-12	0.70992	0.87042	3.7582	2	170620000	82714000	87910000				710	1984;3180	False;True	2123;3458	3176;5169;5170	4561;7371;7372;7373	4561;7373
SPBC83.08	SPBC83.08	4	4	4	>SPBC83.08 |rvb2||AAA family ATPase Rvb2|Schizosaccharomyces pombe|chr 2|||Manual	1	4	4	4	15.3	15.3	15.3	51.561	465	465	3.9762e-48	1.044	1.2484	24.146	7	1172200000	560540000	611670000				711	180;2151;3253;3720	True;True;True;True	190;191;2317;2318;3544;4055	301;302;303;3492;3493;5303;5304;5305;6044	426;427;428;429;430;5001;5002;5003;5004;5005;7562;7563;7564;7565;8661;8662;8663	429;5003;7565;8662	252	348
SPBC83.14c	SPBC83.14c	1	1	1	>SPBC83.14c |rfc5||DNA replication factor C complex subunit Rfc5 |Schizosaccharomyces pombe|chr 2|||Manual	1	1	1	1	4.2	4.2	4.2	40.403	358	358	0.0003922	NaN	NaN	NaN	1	17759000	14584000	3175200				712	3338	TRUE	3636	5443	7783	7783
SPBC83.15	SPBC83.15	1	1	1	>SPBC83.15 |||ribosome biogenesis protein Nsa1 |Schizosaccharomyces pombe|chr 2|||Manual	1	1	1	1	4.1	4.1	4.1	43.767	387	387	1.5274e-06	NaN	NaN	NaN	1	13781000	10477000	3304700				713	1565	TRUE	1673	2551	3665	3665
SPBC839.07	SPBC839.07	1	1	1	>SPBC839.07 |ibp1||Cdc25 family phosphatase Ibp1|Schizosaccharomyces pombe|chr 2|||Manual	1	1	1	1	13.8	13.8	13.8	15.778	138	138	8.2513e-08	NaN	NaN	NaN	0	0	0	0				714	1373	TRUE	1465	2238	3210	3210
SPBC839.08c	SPBC839.08c	1	1	1	>SPBC839.08c |its8||pig-N |Schizosaccharomyces pombe|chr 2|||Manual	1	1	1	1	1.2	1.2	1.2	106.4	935	935	1.3453e-17	NaN	NaN	NaN	0	0	0	0				715	1747	TRUE	1872	2845	4087	4087
SPBC839.16	SPBC839.16	6	6	6	>SPBC839.16 |||C1-5,6,7,8-tetrahydrofolate |Schizosaccharomyces pombe|chr 2|||Manual	1	6	6	6	12.1	12.1	12.1	101.2	937	937	4.0504e-32	0.80185	0.86553	18.177	6	415580000	218200000	197380000				716	209;791;1031;2908;3051;3267	True;True;True;True;True;True	221;837;1091;3160;3318;3559	343;1315;1694;4758;4973;4974;4975;5324	488;489;1893;1894;2429;2430;6792;7096;7097;7098;7099;7593;7594	488;1894;2429;6792;7099;7593
SPBC887.10	SPBC887.10	1	1	1	>SPBC887.10 |mcs4||response regulator Mcs4|Schizosaccharomyces pombe|chr 2|||Manual	1	1	1	1	5.2	5.2	5.2	57.239	522	522	1.0799e-14	NaN	NaN	NaN	1	29267000	20018000	9248800				717	1614	TRUE	1727	2621	3766	3766
SPBC887.14c	SPBC887.14c	1	1	1	>SPBC887.14c |pfh1|pif1|5 to 3 DNA helicase, involved in DNA recombination and repair Pif1|Schizosaccharomyces pombe|chr 2|||Manual	1	1	1	1	1.9	1.9	1.9	90.049	805	805	2.3354e-05	NaN	NaN	NaN	1	11639000	7758500	3880900				718	2931	TRUE	3186	4803	6865	6865
SPBC887.15c	SPBC887.15c	2	2	2	>SPBC887.15c |sur2||sphingosine hydroxylase Sur2|Schizosaccharomyces pombe|chr 2|||Manual	1	2	2	2	9.2	9.2	9.2	34.19	293	293	3.7764e-15	1.4214	1.6138	35.647	2	70942000	37898000	33045000				719	2310;3753	True;True	2510;4090	3798;6091	5434;5435;5436;8727	5435;8727
SPBC887.18c	SPBC887.18c	12	12	12	>SPBC887.18c |hfi1||SAGA complex subunit Hfi1|Schizosaccharomyces pombe|chr 2|||Manual	1	12	12	12	46	46	46	37.945	339	339	9.576e-176	1.9762	2.0565	25.408	22	4680300000	1441800000	3238500000				720	118;554;1025;1026;1434;1768;2336;2337;2903;3228;3229;3574	True;True;True;True;True;True;True;True;True;True;True;True	123;585;1085;1086;1528;1894;2542;2543;3155;3515;3516;3517;3894	219;958;959;1686;1687;1688;1689;2322;2323;2872;3846;3847;3848;3849;4749;4750;4751;4752;5257;5258;5259;5260;5798	309;1378;1379;1380;1381;2417;2418;2419;2420;2421;2422;2423;3326;3327;3328;3329;4122;5502;5503;5504;5505;5506;5507;5508;6778;6779;6780;6781;6782;6783;6784;7496;7497;7498;7499;7500;8305;8306	309;1379;2420;2422;3326;4122;5503;5505;6784;7496;7499;8305	253	46
SPBC8D2.06	SPBC8D2.06	5	5	5	>SPBC8D2.06 |irs1||cytoplasmic isoleucine-tRNA ligase Irs1 |Schizosaccharomyces pombe|chr 2|||Manual	1	5	5	5	7.4	7.4	7.4	122.91	1064	1064	3.9299e-39	0.90967	1.1113	34.597	4	134200000	66665000	67534000				721	378;1124;1346;3013;3509	True;True;True;True;True	397;1196;1435;3276;3825	582;1853;2201;4921;4922;5717	840;841;2678;3159;7028;7029;8192	841;2678;3159;7029;8192
SPBC8D2.18c	SPBC8D2.18c	1	1	1	>SPBC8D2.18c |||adenosylhomocysteinase |Schizosaccharomyces pombe|chr 2|||Manual	1	1	1	1	3.7	3.7	3.7	47.383	433	433	8.037e-07	NaN	NaN	NaN	1	49094000	20993000	28101000				722	566	TRUE	597	975	1401	1401
SPBC8E4.03	SPBC8E4.03	1	1	1	>SPBC8E4.03 |||agmatinase 2 |Schizosaccharomyces pombe|chr 2|||Manual	1	1	1	1	3.9	3.9	3.9	45.901	413	413	5.6318e-06	NaN	NaN	NaN	1	41654000	18189000	23465000				723	1809	TRUE	1937	2928	4201;4202	4202
SPBC902.02c	SPBC902.02c	2	2	2	>SPBC902.02c |ctf18|chl12|RFC-like complex subunit Ctf18|Schizosaccharomyces pombe|chr 2|||Manual	1	2	2	2	5.3	5.3	5.3	108.65	960	960	1.2268e-05	1.0929	1.4178	130.19	2	63992000	7466400	56526000				724	1054;2780	True;True	1116;3030	1731;4558	2488;6519	2488;6519
SPBC902.06	SPBC902.06	20	20	20	>SPBC902.06 |mto2||MT organizer Mto2|Schizosaccharomyces pombe|chr 2|||Manual	1	20	20	20	80.9	80.9	80.9	44.017	397	397	0	0.75986	0.95334	21.477	77	68205000000	32128000000	36078000000				725	412;601;610;700;1128;1245;1941;2112;2414;2661;2686;2817;2830;2926;2958;3282;3283;3327;3603;3604	True;True;True;True;True;True;True;True;True;True;True;True;True;True;True;True;True;True;True;True	435;436;636;646;743;1200;1322;1323;2077;2261;2262;2636;2902;2930;3067;3080;3179;3180;3181;3217;3576;3577;3578;3625;3930;3931	643;644;645;646;1037;1038;1052;1182;1183;1857;2036;2037;3108;3109;3110;3111;3112;3113;3114;3360;3361;3362;3363;3364;3365;3366;4037;4038;4039;4396;4397;4438;4439;4619;4620;4621;4622;4623;4624;4625;4626;4627;4628;4629;4630;4631;4632;4633;4634;4635;4636;4637;4638;4653;4789;4790;4791;4792;4793;4794;4795;4796;4797;4798;4843;5349;5350;5351;5352;5353;5422;5423;5424;5425;5426;5427;5428;5429;5430;5862;586…	932;933;934;935;936;937;938;1495;1496;1497;1498;1499;1515;1699;1700;1701;2684;2685;2926;2927;2928;2929;4452;4453;4454;4455;4456;4457;4458;4459;4460;4461;4462;4463;4464;4465;4824;4825;4826;4827;4828;4829;4830;4831;4832;4833;4834;4835;4836;4837;4838;4839;4840;5790;5791;5792;5793;5794;5795;5796;5797;5798;6296;6297;6357;6358;6359;6360;6601;6602;6603;6604;6605;6606;6607;6608;6609;6610;6611;6612;6613;6…	938;1498;1515;1699;2684;2929;4457;4840;5791;6296;6358;6603;6644;6850;6916;7631;7638;7756;8406;8416	254;255;256;257;258;259;260	51;59;95;186;191;280;336
SPBC947.02	SPBC947.02	1	1	1	>SPBC947.02 |apl2||AP-1 adaptor complex subunit beta subunit Apl2|Schizosaccharomyces pombe|chr 2|||Manual	1	1	1	1	2.9	2.9	2.9	76.681	683	683	0.020747	NaN	NaN	NaN	0	0	0	0				726	3132	TRUE	3410	5106	7283	7283
SPBC947.15c	SPBC947.15c	7	7	7	>SPBC947.15c |||mitochondrial NADH dehydrogenase |Schizosaccharomyces pombe|chr 2|||Manual	1	7	7	7	12.3	12.3	12.3	60.78	551	551	7.4683e-43	0.72194	0.82788	15.526	5	229360000	135360000	93998000				727	936;1206;1525;1689;1954;2161;2844	True;True;True;True;True;True;True	991;1278;1625;1810;2093;2334;2335;3094	1549;1969;2477;2757;3136;3137;3513;3514;4670	2225;2837;3560;3955;4498;4499;5035;5036;6666	2225;2837;3560;3955;4499;5035;6666	261	505
SPBC9B6.04c	SPBC9B6.04c	5	5	5	>SPBC9B6.04c |tuf1||mitochondrial translation elongation factor EF-Tu Tuf1|Schizosaccharomyces pombe|chr 2|||Manual	1	5	5	5	11.4	11.4	11.4	48.282	439	439	2.1587e-57	0.8359	1.0177	28.25	10	314920000	184040000	130880000				728	1552;1604;1921;1922;3083	True;True;True;True;True	1660;1716;2052;2053;3355;3356	2531;2608;3078;3079;3080;5025;5026;5027;5028;5029	3638;3742;3743;4410;4411;4412;7172;7173;7174;7175;7176;7177;7178	3638;3742;4411;4412;7176	262;263	235;255
SPBP16F5.03c	SPBP16F5.03c	235	235	232	>SPBP16F5.03c |tra1||SAGA complex phosphatidylinositol pseudokinase Tra1|Schizosaccharomyces pombe|chr 2|||Manual	1	235	235	232	62.7	62.7	62.4	422.33	3699	3699	0	1.7988	2.0742	29.913	329	49261000000	16175000000	33086000000				729	75;143;144;145;193;215;241;245;262;287;334;337;350;353;366;409;423;445;458;464;470;474;475;476;477;484;496;524;556;575;607;615;616;625;632;633;643;653;657;738;739;744;745;752;804;810;811;812;831;858;861;862;886;948;957;970;1021;1022;1023;1041;1057;1083;1103;1104;1106;1133;1134;1135;1159;1160;1198;1228;1247;1248;1330;1331;1337;1339;1393;1409;1443;1477;1487;1488;1495;1496;1526;1531;1553;1556;1561;1…	True;True;True;True;True;True;True;True;True;True;True;True;True;True;True;True;True;True;True;True;True;True;True;True;True;True;True;True;True;True;True;True;True;True;True;True;True;True;True;True;True;True;True;True;True;True;True;True;True;True;True;True;True;True;True;True;True;True;True;True;True;True;True;True;True;True;True;True;True;True;True;True;True;True;True;True;True;True;True;True…	79;150;151;152;204;227;255;259;277;302;352;355;368;371;384;432;447;469;470;484;491;497;501;502;503;504;511;525;554;587;606;607;643;651;652;663;670;671;681;682;692;696;781;782;783;784;789;790;797;850;856;857;858;859;860;880;907;910;911;937;1003;1013;1026;1080;1081;1082;1083;1102;1119;1148;1170;1171;1172;1173;1174;1175;1177;1205;1206;1207;1231;1232;1270;1303;1304;1325;1326;1417;1418;1424;1425;1427;…	164;250;251;252;253;254;255;320;349;383;390;391;392;414;451;452;529;530;534;550;551;552;555;568;636;666;697;698;716;727;735;740;741;742;743;744;751;829;910;961;989;990;991;992;993;1047;1058;1059;1075;1084;1085;1086;1087;1098;1099;1100;1113;1117;1236;1237;1238;1239;1240;1246;1247;1248;1260;1261;1331;1332;1339;1340;1341;1342;1343;1344;1345;1346;1368;1369;1425;1428;1429;1430;1470;1471;1564;1565;1575…	235;236;353;354;355;356;357;358;359;360;361;362;363;451;452;453;454;496;497;543;554;555;556;589;590;650;651;652;765;766;770;771;794;795;796;799;818;819;924;964;965;1009;1010;1011;1012;1042;1063;1064;1075;1081;1082;1083;1084;1085;1086;1087;1088;1098;1206;1312;1384;1385;1419;1420;1421;1422;1423;1424;1425;1509;1521;1522;1523;1524;1542;1554;1555;1556;1557;1558;1575;1576;1577;1578;1579;1595;1596;1600;…	235;355;359;363;452;496;543;555;590;651;766;770;794;799;819;924;964;1009;1042;1063;1075;1082;1084;1086;1088;1098;1206;1312;1384;1424;1509;1521;1524;1542;1556;1557;1577;1595;1600;1771;1778;1785;1788;1809;1921;1933;1939;1940;1970;2045;2048;2050;2106;2245;2260;2289;2411;2412;2413;2464;2495;2562;2626;2635;2638;2693;2695;2696;2737;2739;2820;2879;2932;2933;3128;3129;3142;3145;3250;3283;3348;3418;3469;3…	264;265;266;267;268;269;270;271;272;273;274;275;276;277;278;279;280;281;282;283;284;285;286;287;288;289;290;291;292;293;294;295;296	263;410;414;420;494;520;835;839;957;979;1098;1136;1357;1448;1570;1593;1682;1833;1845;2064;2205;2361;2418;2574;2724;2837;2942;3228;3455;3456;3485;3643;3691
SPBP16F5.08c	SPBP16F5.08c	1	1	1	>SPBP16F5.08c |||flavin dependent monooxygenase |Schizosaccharomyces pombe|chr 2|||Manual	1	1	1	1	2.5	2.5	2.5	49.889	447	447	0.0076378	NaN	NaN	NaN	1	15742000	9990100	5751400				730	1485	TRUE	1581	2414	3467	3467
SPBP18G5.03	SPBP18G5.03	1	1	1	>SPBP18G5.03 |toc1||Tor complex Tor2 interacting protein 1|Schizosaccharomyces pombe|chr 2|||Manual	1	1	1	1	1.9	1.9	1.9	48.791	430	430	0.00052019	NaN	NaN	NaN	1	27850000	16110000	11740000				731	2010	TRUE	2152	3208	4606	4606
SPBP19A11.03c	SPBP19A11.03c	16	16	16	>SPBP19A11.03c |mts4|rpn1|19S proteasome regulatory subunit Mts4|Schizosaccharomyces pombe|chr 2|||Manual	1	16	16	16	25.9	25.9	25.9	97.998	891	891	1.6834e-197	0.7243	0.89113	15.499	20	2187500000	1199600000	987890000				732	54;89;149;751;1502;1518;1967;2152;2224;2470;2505;3255;3256;3428;3467;3812	True;True;True;True;True;True;True;True;True;True;True;True;True;True;True;True	57;93;156;796;1600;1617;2106;2319;2320;2419;2697;2734;3546;3547;3733;3776;4152	91;182;259;260;1257;1258;1259;2436;2437;2467;2468;3152;3494;3495;3496;3660;3661;4120;4172;5307;5308;5572;5652;5653;5654;6184	134;261;262;368;369;370;1803;1804;1805;1806;1807;1808;3500;3501;3544;3545;3546;4521;4522;5006;5007;5008;5246;5247;5911;5978;7567;7568;7569;7570;7571;7982;8096;8097;8098;8099;8100;8101;8102;8868	134;261;368;1807;3501;3545;4521;5007;5247;5911;5978;7568;7571;7982;8098;8868	297;298	742;810
SPBP19A11.07c	SPBP19A11.07c	1	1	1	>SPBP19A11.07c ||SPBP4H10.02c|human C17orf28 ortholog 2|Schizosaccharomyces pombe|chr 2|||Manual	1	1	1	1	1.7	1.7	1.7	79.557	688	688	0.0028107	NaN	NaN	NaN	1	11117000	6109900	5007300				733	2212	TRUE	2406	3641;3642	5218;5219;5220	5219
SPBP22H7.08;SPAC31G5.17c	SPBP22H7.08;SPAC31G5.17c	2;1	2;1	2;1	>SPBP22H7.08 |rps1002|rps10-2, rps10B|40S ribosomal protein S10 |Schizosaccharomyces pombe|chr 2|||Manual;>SPAC31G5.17c |rps1001|rps10-1|40S ribosomal protein S10 |Schizosaccharomyces pombe|chr 1|||Manual	2	2	2	2	19	19	19	16.443	147	147;144	1.475e-07	0.99579	1.1409	7.1113	2	70637000	36809000	33829000				734	138;1112	True;True	144;1183	243;1837	342;2655	342;2655
SPBP23A10.07	SPBP23A10.07	8	8	8	>SPBP23A10.07 |rpa2||DNA-directed RNA polymerase I complex subunit Rpa2|Schizosaccharomyces pombe|chr 2|||Manual	1	8	8	8	10.4	10.4	10.4	131.69	1174	1174	3.5879e-76	0.82615	0.9832	19.847	11	373940000	203540000	170400000				735	208;323;443;552;1410;1872;2190;3041	True;True;True;True;True;True;True;True	220;340;467;583;1502;2001;2377;2378;3308	342;513;514;515;694;955;2291;2292;3012;3596;3597;3598;3599;4960	487;740;741;742;743;744;745;1005;1373;1374;1375;3284;3285;3286;4322;5153;5154;5155;5156;5157;5158;7080	487;741;1005;1374;3286;4322;5156;7080	299	947
SPBP23A10.08	SPBP23A10.08	1	1	1	>SPBP23A10.08 |alp5|arp4|actin-like protein Arp4|Schizosaccharomyces pombe|chr 2|||Manual	1	1	1	1	2.3	2.3	2.3	48.772	433	433	7.7918e-05	NaN	NaN	NaN	1	74840000	14357000	60482000				736	3188	TRUE	3468	5180	7387	7387
SPBP35G2.07	SPBP35G2.07	23	23	23	>SPBP35G2.07 |ilv1||acetolactate synthase catalytic subunit|Schizosaccharomyces pombe|chr 2|||Manual	1	23	23	23	48	48	48	73.193	669	669	0	0.82927	0.97876	39.485	36	6430900000	3043500000	3387300000				737	494;652;658;659;660;971;972;1129;1306;1375;1376;1584;1585;1631;1970;2583;2657;2923;2924;3649;3650;3701;3709	True;True;True;True;True;True;True;True;True;True;True;True;True;True;True;True;True;True;True;True;True;True;True	522;523;691;697;698;699;1027;1028;1029;1201;1389;1390;1467;1468;1695;1696;1745;2109;2818;2898;3176;3177;3978;3979;4033;4042;4043	825;826;827;1112;1118;1119;1120;1121;1594;1595;1596;1597;1858;1859;2148;2149;2240;2241;2242;2579;2580;2581;2647;3155;3156;3157;4286;4287;4390;4391;4392;4784;4785;4786;5934;5935;5936;6012;6013;6026;6027	1201;1202;1203;1204;1594;1601;1602;1603;1604;1605;1606;1607;2290;2291;2292;2293;2294;2295;2686;2687;2688;2689;3084;3085;3086;3087;3088;3212;3213;3214;3699;3700;3701;3702;3703;3704;3811;3812;3813;4526;4527;4528;4529;6137;6138;6139;6140;6141;6287;6288;6289;6290;6829;6830;6831;6832;6833;6834;8499;8500;8501;8502;8503;8504;8505;8506;8606;8607;8608;8609;8629;8630;8631;8632;8633;8634	1203;1594;1602;1603;1607;2290;2292;2686;3085;3212;3214;3700;3704;3813;4527;6141;6290;6829;6833;8502;8503;8607;8630	300;301;302;303	266;523;580;639
SPBP4H10.06c	SPBP4H10.06c	1	1	1	>SPBP4H10.06c |cut14|smc2|condensin complex subunit Cut14|Schizosaccharomyces pombe|chr 2|||Manual	1	1	1	1	1.5	1.5	1.5	134.14	1172	1172	1.8055e-11	NaN	NaN	NaN	1	38303000	17840000	20464000				738	2105	TRUE	2253	3351	4814	4814
SPBP4H10.08	SPBP4H10.08	1	1	1	>SPBP4H10.08 |qcr10||Reiske ISP-associated protein, ubiquinol-cytochrome-c reductase complex subunit Qcr10 |Schizosaccharomyces pombe|chr 2|||Manual	1	1	1	1	8.9	8.9	8.9	9.1247	79	79	0.0041884	NaN	NaN	NaN	0	0	0	0				739	3153	TRUE	3431	5133	7320	7320
SPBP4H10.11c	SPBP4H10.11c	3	3	3	>SPBP4H10.11c |lcf2||long-chain-fatty-acid-CoA ligase|Schizosaccharomyces pombe|chr 2|||Manual	1	3	3	3	7.7	7.7	7.7	75.79	689	689	4.2849e-18	0.61344	0.67876	34.049	3	134100000	66803000	67296000				740	1810;1846;2311	True;True;True	1938;1975;2511	2929;2984;3799	4203;4289;4290;5437	4203;4290;5437
SPBP8B7.02	SPBP8B7.02	2	2	2	>SPBP8B7.02 |||sequence orphan|Schizosaccharomyces pombe|chr 2|||Manual	1	2	2	2	18.4	18.4	18.4	30.025	261	261	2.2956e-52	0.88226	1.1477	32.334	3	150920000	75394000	75531000				741	2536;2841	True;True	2765;3091	4210;4211;4666	6031;6032;6661;6662	6031;6662
SPBP8B7.03c	SPBP8B7.03c	10	5	5	>SPBP8B7.03c |rpl402|rpl4-2, rpl4|60S ribosomal protein L4 |Schizosaccharomyces pombe|chr 2|||Manual	1	10	5	5	30	15.2	15.2	39.767	363	363	4.1403e-129	0.71197	0.76363	25.103	10	1393500000	821900000	571590000				742	883;967;1197;1936;2400;2577;2603;2644;2645;3716	False;True;False;False;False;True;False;True;True;True	934;1023;1269;2072;2618;2811;2841;2884;2885;4051	1464;1465;1466;1586;1954;1955;3101;3102;4003;4277;4278;4312;4313;4314;4369;4370;4371;4372;4373;6038;6039	2096;2097;2098;2278;2818;2819;4437;4438;4439;4440;4441;4442;5727;5728;6127;6128;6129;6174;6175;6176;6177;6178;6179;6255;6256;6257;6258;6259;6260;6261;6262;8651;8652;8653;8654;8655	2098;2278;2818;4440;5728;6128;6177;6255;6258;8653
SPBP8B7.05c	SPBP8B7.05c	1	1	1	>SPBP8B7.05c |||carbonic anhydrase |Schizosaccharomyces pombe|chr 2|||Manual	1	1	1	1	5.5	5.5	5.5	37.009	328	328	6.8708e-12	NaN	NaN	NaN	1	86038000	39888000	46150000				743	3553	TRUE	3872	5770	8266;8267	8266
SPBP8B7.06	SPBP8B7.06	1	1	1	>SPBP8B7.06 |rpp201|rpp2, rpp2-1|60S acidic ribosomal protein P2A subunit |Schizosaccharomyces pombe|chr 2|||Manual	1	1	1	1	20.9	20.9	20.9	11.158	110	110	1.4259e-56	NaN	NaN	NaN	0	0	0	0				744	1203	TRUE	1275	1965	2833	2833
SPBP8B7.16c	SPBP8B7.16c	3	2	2	>SPBP8B7.16c |dbp2||ATP-dependent RNA helicase Dbp2|Schizosaccharomyces pombe|chr 2|||Manual	1	3	2	2	9.6	7.6	7.6	61.547	550	550	1.4771e-27	1.0379	1.3312	41.314	3	179140000	105680000	73456000				745	585;912;2148	True;True;False	617;967;2314	1010;1011;1512;3485	1452;1453;1454;1455;2170;4993	1453;2170;4993
SPBP8B7.18c	SPBP8B7.18c	4	4	4	>SPBP8B7.18c |||TENA/THI family protein|Schizosaccharomyces pombe|chr 2|||Manual	1	4	4	4	16	16	16	61.354	551	551	1.8023e-33	0.87962	0.95091	41.265	4	128220000	60503000	67717000				746	298;433;1468;3711	True;True;True;True	313;457;1563;4045	469;680;2366;6029	674;675;985;986;3398;3399;3400;3401;8636;8637	675;985;3401;8637
SPBP8B7.19	SPBP8B7.19	2	2	2	>SPBP8B7.19 |spt16||FACT complex component Spt16|Schizosaccharomyces pombe|chr 2|||Manual	1	2	2	2	2.7	2.7	2.7	116.45	1019	1019	1.8308e-09	NaN	NaN	NaN	1	48641000	40718000	7923400				747	66;3734	True;True	70;4069	153;6060	220;8685	220;8685
SPBP8B7.20c	SPBP8B7.20c	2	2	2	>SPBP8B7.20c |||RNA methyltransferase Nop2 |Schizosaccharomyces pombe|chr 2|||Manual	1	2	2	2	5.1	5.1	5.1	68.934	608	608	2.0927e-29	0.77141	0.94894	10.821	3	203400000	108860000	94541000				748	2487;2637	True;True	2714;2877	4140;4360;4361	5936;6244;6245;6246;6247	5936;6245
SPBP8B7.29	SPBP8B7.29	1	1	1	>SPBP8B7.29 |||para-aminobenzoate synthase |Schizosaccharomyces pombe|chr 2|||Manual	1	1	1	1	1.7	1.7	1.7	80.598	718	718	0.022537	NaN	NaN	NaN	1	19105000	14866000	4239600				749	2860	TRUE	3110	4689	6686	6686
SPBPB21E7.07	SPBPB21E7.07	1	1	1	>SPBPB21E7.07 |aes1|SPAPB21E7.07|enhancer of RNA-mediated gene silencing|Schizosaccharomyces pombe|chr 2|||Manual	1	1	1	1	7.8	7.8	7.8	32.228	296	296	2.0086e-12	NaN	NaN	NaN	0	0	0	0				750	965	TRUE	1021	1583	2273	2273
SPBPJ4664.04	SPBPJ4664.04	23	23	23	>SPBPJ4664.04 |||coatomer alpha subunit |Schizosaccharomyces pombe|chr 2|||Manual	1	23	23	23	24.4	24.4	24.4	136.37	1207	1207	1.7545e-101	0.84795	1.009	33.616	23	1048200000	546350000	501870000				751	154;172;338;817;891;1011;1020;1090;1149;1359;1382;1895;2126;2134;2366;2660;2679;2911;2912;3135;3162;3675;3676	True;True;True;True;True;True;True;True;True;True;True;True;True;True;True;True;True;True;True;True;True;True;True	161;182;356;865;942;1070;1079;1155;1221;1451;1474;2024;2282;2295;2296;2578;2901;2923;3163;3164;3413;3440;4005;4006	266;292;535;1351;1478;1667;1679;1794;1885;2220;2221;2250;3042;3439;3455;3456;3457;3898;4395;4428;4429;4762;4763;4764;5112;5143;5970;5971	376;413;772;1947;1948;2117;2388;2408;2409;2588;2721;3185;3186;3226;4362;4933;4954;4955;4956;4957;5580;5581;6295;6343;6344;6345;6797;6798;6799;6800;7290;7333;8552;8553	376;413;772;1948;2117;2388;2408;2588;2721;3186;3226;4362;4933;4956;5581;6295;6345;6798;6800;7290;7333;8552;8553	304	42
SPBPJ4664.06	SPBPJ4664.06	1	1	1	>SPBPJ4664.06 |gpt1||UDP-glucose-glycoprotein glucosyltransferase Gpt1|Schizosaccharomyces pombe|chr 2|||Manual	1	1	1	1	0.7	0.7	0.7	165.47	1448	1448	0.0058439	NaN	NaN	NaN	0	0	0	0				752	151	TRUE	158	263	373	373
SPCC1020.06c	SPCC1020.06c	2	2	2	>SPCC1020.06c |tal1||transaldolase |Schizosaccharomyces pombe|chr 3|||Manual	1	2	2	2	7.8	7.8	7.8	35.238	322	322	0.0010746	NaN	NaN	NaN	1	43752000	20313000	23439000				753	1581;3165	True;True	1692;3443	2576;5146	3695;7337	3695;7337
SPCC1183.01	SPCC1183.01	2	2	2	>SPCC1183.01 |sec15|SPCC1672.13|exocyst complex subunit Sec15 |Schizosaccharomyces pombe|chr 3|||Manual	1	2	2	2	3.1	3.1	3.1	88.549	768	768	3.4939e-07	0.75776	0.86842	26.044	2	40734000	25312000	15422000				754	134;2233	True;True	140;2429	239;3671	338;5260	338;5260
SPCC1183.07	SPCC1183.07	10	10	10	>SPCC1183.07 |||U3 snoRNP-associated protein Rrp5 |Schizosaccharomyces pombe|chr 3|||Manual	1	10	10	10	7.9	7.9	7.9	187.52	1690	1690	2.3522e-56	0.96279	1.1402	56.73	10	439680000	207800000	231880000				755	76;641;863;1188;1205;1369;1370;3144;3499;3620	True;True;True;True;True;True;True;True;True;True	80;679;912;1260;1277;1461;1462;3422;3814;3948	165;1096;1431;1936;1968;2233;2234;5122;5702;5897	237;1572;2051;2791;2836;3203;3204;7303;7304;8171;8446;8447	237;1572;2051;2791;2836;3203;3204;7304;8171;8447
SPCC1183.08c;SPBC30D10.18c	SPCC1183.08c	7;1	7;1	7;1	>SPCC1183.08c |rpl101|rpl1-1, rpl10a-1|60S ribosomal protein L10a|Schizosaccharomyces pombe|chr 3|||Manual	2	7	7	7	33.8	33.8	33.8	23.917	216	216;216	4.5573e-61	0.67132	0.75877	47.285	8	958190000	539240000	418950000				756	102;768;783;1622;1950;1951;2913	True;True;True;True;True;True;True	106;813;829;1735;2088;2089;2090;3165	199;1282;1283;1304;2631;3129;3130;3131;4765	286;1838;1839;1840;1878;3778;3779;4489;4490;4491;6801	286;1838;1878;3778;4489;4491;6801	305	62
SPCC11E10.08	SPCC11E10.08	1	1	1	>SPCC11E10.08 |rik1||silencing protein Rik1|Schizosaccharomyces pombe|chr 3|||Manual	1	1	1	1	0.9	0.9	0.9	118.12	1040	1040	0.024878	NaN	NaN	NaN	1	12523000	12071000	452400				757	1325	TRUE	1412	2173	3121	3121
SPCC1223.02	SPCC1223.02	5	5	5	>SPCC1223.02 |nmt1|thi3|no message in thiamine Nmt1|Schizosaccharomyces pombe|chr 3|||Manual	1	5	5	5	19.7	19.7	19.7	38.965	346	346	1.9308e-83	0.67584	0.80722	14.977	4	325810000	189180000	136630000				758	269;357;1047;1435;2989	True;True;True;True;True	284;375;1109;1529;3251	425;559;1723;2324;4887	606;804;2476;3330;6977;6978	606;804;2476;3330;6978
SPCC1223.06	SPCC1223.06	3	3	3	>SPCC1223.06 |tea1|alp8|cell end marker Tea1|Schizosaccharomyces pombe|chr 3|||Manual	1	3	3	3	4.5	4.5	4.5	127.43	1147	1147	2.6159e-26	0.77954	0.95269	32.569	2	73597000	39632000	33965000				759	98;273;2784	True;True;True	102;288;3034	193;431;4563	278;615;6526	278;615;6526
SPCC1223.07c	SPCC1223.07c	6	6	6	>SPCC1223.07c |drs1||cytoplasmic aspartate-tRNA ligase Drs1 |Schizosaccharomyces pombe|chr 3|||Manual	1	6	6	6	15.7	15.7	15.7	66.67	580	580	2.871e-97	0.74891	0.91989	17.298	5	307750000	167830000	139920000				760	1237;1723;2467;3249;3396;3644	True;True;True;True;True;True	1313;1845;2694;3540;3700;3972;3973	2018;2806;4117;5297;5527;5927;5928	2903;4031;5908;7553;7554;7921;8487;8488;8489	2903;4031;5908;7553;7921;8487	306	557
SPCC1223.08c	SPCC1223.08c	7	7	7	>SPCC1223.08c |dfr1||dihydrofolate reductase Dfr1|Schizosaccharomyces pombe|chr 3|||Manual	1	7	7	7	26.2	26.2	26.2	51.522	461	461	1.9929e-77	0.72308	0.88771	19.439	9	800080000	423450000	376630000				761	126;356;454;827;828;2051;3400	True;True;True;True;True;True;True	132;374;479;876;877;2196;3704	230;558;708;709;1363;1364;1365;3260;3261;5531	326;327;802;803;1029;1030;1031;1962;1963;1964;1965;1966;4687;4688;4689;7927	327;802;1031;1963;1965;4688;7927
SPCC1235.02	SPCC1235.02	4	4	4	>SPCC1235.02 |bio2|SPCC320.01c|biotin synthase|Schizosaccharomyces pombe|chr 3|||Manual	1	4	4	4	12.1	12.1	12.1	40.65	363	363	3.4936e-17	1.0583	1.2898	25.375	5	292920000	121400000	171530000				762	621;1486;2261;3101	True;True;True;True	658;659;1582;2460;3375	1069;1070;2415;3735;5051;5052	1535;1536;3468;5345;5346;7207;7208;7209	1536;3468;5345;7208
SPCC1235.09	SPCC1235.09	1	1	1	>SPCC1235.09 |hif2||Set3 complex subunit Hif2|Schizosaccharomyces pombe|chr 3|||Manual	1	1	1	1	2.1	2.1	2.1	62.758	564	564	0.010675	NaN	NaN	NaN	1	17930000	11641000	6289100				763	3704	TRUE	4037	6019	8617	8617
SPCC1235.14	SPCC1235.14	5	5	5	>SPCC1235.14 |ght5||hexose transporter Ght5|Schizosaccharomyces pombe|chr 3|||Manual	1	5	5	5	9.9	9.9	9.9	60.32	546	546	1.1784e-29	1.1789	1.4091	14.196	2	234590000	114990000	119610000				764	411;637;2335;3783;3800	True;True;True;True;True	434;675;2541;4122;4139	641;642;1091;3845;6141;6161;6162	930;931;1564;1565;1566;5501;8798;8831;8832	931;1566;5501;8798;8831	307	219
SPCC1235.15	SPCC1235.15	1	1	1	>SPCC1235.15 |dga1|SPCC548.01|diacylglycerol O-acyltransferase Dga1|Schizosaccharomyces pombe|chr 3|||Manual	1	1	1	1	3.5	3.5	3.5	39.485	345	345	0.010136	NaN	NaN	NaN	1	25076000	12268000	12808000				765	1151	TRUE	1223	1887	2724	2724
SPCC1259.02c	SPCC1259.02c	1	1	1	>SPCC1259.02c |||Endoplasmic Reticulum metallopeptidase 1 |Schizosaccharomyces pombe|chr 3|||Manual	1	1	1	1	1.5	1.5	1.5	91.841	822	822	1.6477e-06	NaN	NaN	NaN	1	10190000	3844900	6345500				766	1130	TRUE	1202	1860	2690	2690
SPCC1259.09c	SPCC1259.09c	11	11	11	>SPCC1259.09c |pdx1||pyruvate dehydrogenase protein x component, Pdx1 |Schizosaccharomyces pombe|chr 3|||Manual	1	11	11	11	34.9	34.9	34.9	50.883	456	456	1.9751e-139	2.2298	2.3805	22.62	15	3932100000	1076900000	2855300000				767	393;478;549;1361;1870;2292;2710;2711;2904;3387;3767	True;True;True;True;True;True;True;True;True;True;True	415;505;580;1453;1999;2491;2956;2957;3156;3690;4104;4105	610;611;745;945;946;2223;3010;3775;4475;4476;4477;4753;5513;6108;6109	886;887;888;1089;1090;1356;1357;1358;3189;3190;4319;5400;5401;6402;6403;6404;6405;6406;6407;6408;6785;7890;7891;7892;7893;7894;8748;8749	888;1089;1356;3190;4319;5400;6402;6406;6785;7892;8749	308	360
SPCC1281.06c	SPCC1281.06c	7	7	7	>SPCC1281.06c |||acyl-coA desaturase |Schizosaccharomyces pombe|chr 3|||Manual	1	7	7	7	24.6	24.6	24.6	54.438	479	479	6.5758e-102	0.96276	1.1823	31.453	11	1001700000	489930000	511750000				768	402;1384;2249;2680;3157;3158;3263	True;True;True;True;True;True;True	425;1476;2447;2924;3435;3436;3554;3555	626;627;2253;3714;3715;4430;5138;5139;5317;5318;5319;5320	909;910;911;912;3231;5317;5318;6346;6347;7327;7328;7585;7586;7587;7588	910;3231;5317;6346;7327;7328;7585	309	385
SPCC132.04c	SPCC132.04c	1	1	1	>SPCC132.04c |gdh2||NAD-dependent glutamate dehydrogenase Gdh2 |Schizosaccharomyces pombe|chr 3|||Manual	1	1	1	1	1.4	1.4	1.4	125.71	1106	1106	3.8159e-09	NaN	NaN	NaN	1	25327000	6546700	18780000				769	2204	TRUE	2397	3630	5201	5201
SPCC1322.04	SPCC1322.04	4	4	4	>SPCC1322.04 |fyu1||UTP-glucose-1-phosphate uridylyltransferase Fyu1|Schizosaccharomyces pombe|chr 3|||Manual	1	4	4	4	12.8	12.8	12.8	56.429	506	506	1.4566e-35	0.81848	0.96757	12.305	4	136800000	73886000	62917000				770	587;1294;1626;3731	True;True;True;True	619;620;1375;1739;4066	1013;1014;2110;2635;6056	1457;1458;1459;3037;3785;8678;8679	1458;3037;3785;8679	310	57
SPCC1322.13	SPCC1322.13	2	2	2	>SPCC1322.13 |ade6|min1|phosphoribosylaminoimidazole carboxylase Ade6|Schizosaccharomyces pombe|chr 3|||Manual	1	2	2	2	4.7	4.7	4.7	60.013	552	552	2.9561e-09	NaN	NaN	NaN	1	24304000	13807000	10496000				771	110;2871	True;True	114;3122	209;4702	298;6705	298;6705
SPCC1322.14c	SPCC1322.14c	1	1	1	>SPCC1322.14c |vtc4||vacuolar transporter chaperone |Schizosaccharomyces pombe|chr 3|||Manual	1	1	1	1	1.4	1.4	1.4	83.634	721	721	0.00035961	NaN	NaN	NaN	1	7175200	3370000	3805200				772	1498	TRUE	1594	2430	3492	3492
SPCC1322.16	SPCC1322.16	2	2	2	>SPCC1322.16 |phb2||prohibitin Phb2 |Schizosaccharomyces pombe|chr 3|||Manual	1	2	2	2	8.7	8.7	8.7	32.338	288	288	7.0208e-12	NaN	NaN	NaN	1	32627000	16327000	16300000				773	3519;3535	True;True	3835;3852	5728;5746	8206;8207;8233	8207;8233	311	276
SPCC13B11.01	SPCC13B11.01	16	16	16	>SPCC13B11.01 |adh1|adh|alcohol dehydrogenase Adh1|Schizosaccharomyces pombe|chr 3|||Manual	1	16	16	16	55.1	55.1	55.1	37.396	350	350	3.4015e-139	3.6089	3.8223	34.053	24	3991100000	682950000	3308100000				774	664;952;1191;1736;2173;2468;2469;2705;2706;3039;3040;3154;3155;3427;3627;3829	True;True;True;True;True;True;True;True;True;True;True;True;True;True;True;True	703;1008;1263;1860;2353;2695;2696;2950;2951;2952;3304;3305;3306;3307;3432;3433;3732;3955;4170	1128;1570;1940;2826;3564;4118;4119;4462;4463;4464;4465;4466;4467;4468;4469;4470;4955;4956;4957;4958;4959;5134;5135;5136;5570;5571;5905;6206	1620;2254;2797;4062;4063;4064;5113;5909;5910;6388;6389;6390;6391;6392;6393;6394;6395;6396;7074;7075;7076;7077;7078;7079;7321;7322;7323;7324;7325;7977;7978;7979;7980;7981;8460;8898	1620;2254;2797;4063;5113;5909;5910;6389;6393;7074;7077;7321;7322;7979;8460;8898	312;313;314;315	63;230;268;273
SPCC1442.06	SPCC1442.06	1	1	1	>SPCC1442.06 |pre8||20S proteasome component alpha 2, Pre8 |Schizosaccharomyces pombe|chr 3|||Manual	1	1	1	1	5.3	5.3	5.3	26.404	245	245	0.013395	NaN	NaN	NaN	0	0	0	0				775	2017	TRUE	2159	3215	4616	4616
SPCC1442.10c	SPCC1442.10c	1	1	1	>SPCC1442.10c |rpb3||RNA polymerase II subunit 3|Schizosaccharomyces pombe|chr 3|||Manual	1	1	1	1	6.7	6.7	6.7	33.716	297	297	5.1613e-36	NaN	NaN	NaN	1	88313000	44379000	43935000				776	2368	TRUE	2580	3900	5583;5584	5584
SPCC1442.12	SPCC1442.12	1	1	1	>SPCC1442.12 |pps1||phosphatidylserine synthase Pps1|Schizosaccharomyces pombe|chr 3|||Manual	1	1	1	1	6.2	6.2	6.2	26.525	240	240	8.0887e-12	NaN	NaN	NaN	1	43006000	18762000	24245000				777	1836	TRUE	1964	2973	4275	4275
SPCC1494.06c	SPCC1494.06c	3	3	3	>SPCC1494.06c |||ATP-dependent RNA helicase Dbp9 |Schizosaccharomyces pombe|chr 3|||Manual	1	3	3	3	6.2	6.2	6.2	67.45	595	595	1.8983e-12	0.69324	0.77362	24.931	4	92004000	52442000	39562000				778	384;960;3050	True;True;True	404;1016;3317	590;1578;4971;4972	851;852;2266;7093;7094;7095	851;2266;7093
SPCC14G10.02	SPCC14G10.02	1	1	1	>SPCC14G10.02 ||SPCC18B5.13|ribosome biogenesis protein Urb1 |Schizosaccharomyces pombe|chr 3|||Manual	1	1	1	1	0.7	0.7	0.7	179.23	1568	1568	2.8991e-07	NaN	NaN	NaN	0	0	0	0				779	1771	TRUE	1897	2877	4128	4128
SPCC162.02c	SPCC162.02c	4	4	4	>SPCC162.02c |||AMP-binding dehydrogenase |Schizosaccharomyces pombe|chr 3|||Manual	1	4	4	4	6.3	6.3	6.3	109.85	981	981	6.2867e-30	0.81996	0.99131	27.866	3	120720000	68099000	52621000				780	105;674;1688;2602	True;True;True;True	109;714;1809;2840	202;1140;2756;4311	289;1635;3954;6173	289;1635;3954;6173
SPCC162.09c	SPCC162.09c	8	8	8	>SPCC162.09c |hmg1|its12|3-hydroxy-3-methylglutaryl-CoA reductase Hmg1|Schizosaccharomyces pombe|chr 3|||Manual	1	8	8	8	11.7	11.7	11.7	114.88	1053	1053	1.8118e-40	1.0294	1.217	29.16	4	113680000	58122000	55558000				781	380;684;1542;1839;3014;3187;3505;3636	True;True;True;True;True;True;True;True	399;724;1648;1967;3277;3467;3820;3964	584;1153;2510;2976;4923;5179;5709;5918	843;1656;3607;4278;7030;7385;7386;8180;8475	843;1656;3607;4278;7030;7386;8180;8475
SPCC162.12	SPCC162.12	1	1	1	>SPCC162.12 |tco89|SPCC1753.06c|TORC1 subunit Tco89|Schizosaccharomyces pombe|chr 3|||Manual	1	1	1	1	4.9	4.9	4.9	49.212	451	451	0.0011394	0.59341	0.67766	7.9725	2	10192000	6536300	3655400				782	127	TRUE	133	231;232	328;329	328
SPCC1620.06c	SPCC1620.06c	2	2	2	>SPCC1620.06c |||ribose-phosphate pyrophosphokinase |Schizosaccharomyces pombe|chr 3|||Manual	1	2	2	2	8.1	8.1	8.1	34.779	321	321	3.3425e-17	0.67353	0.79674	17.779	2	57405000	35564000	21842000				783	336;1433	True;True	354;1527	532;533;2321	768;769;3325	768;3325
SPCC1620.08	SPCC1620.08	1	1	1	>SPCC1620.08 |||succinate-CoA ligase beta subunit |Schizosaccharomyces pombe|chr 3|||Manual	1	1	1	1	6.7	6.7	6.7	47.287	433	433	7.016e-05	NaN	NaN	NaN	1	41737000	25970000	15767000				784	2862	TRUE	3112	4691	6688	6688
SPCC1620.11	SPCC1620.11	1	1	1	>SPCC1620.11 |nup97|mug87|nucleoporin Nic96 homolog|Schizosaccharomyces pombe|chr 3|||Manual	1	1	1	1	1.9	1.9	1.9	97.563	851	851	0.00013098	NaN	NaN	NaN	0	0	0	0				785	722	TRUE	765	1209	1739	1739
SPCC1620.14c	SPCC1620.14c	1	1	1	>SPCC1620.14c |snf22|SPCC830.01c|ATP-dependent DNA helicase Snf22|Schizosaccharomyces pombe|chr 3|||Manual	1	1	1	1	0.8	0.8	0.8	189.91	1680	1680	0.08888	NaN	NaN	NaN	1	5070100	3659200	1410900	+			786	1288	TRUE	1369	2104	3030	3030	316	993
SPCC1672.02c	SPCC1672.02c	3	3	3	>SPCC1672.02c |sap1||switch-activating protein Sap1|Schizosaccharomyces pombe|chr 3|||Manual	1	3	3	3	18.5	18.5	18.5	29.127	254	254	1.3354e-14	1.4781	1.7091	36.231	2	142320000	54092000	88231000				787	873;1091;3287	True;True;True	922;1156;3582	1443;1795;5358;5359	2068;2589;7646;7647;7648	2068;2589;7647
SPCC1672.03c	SPCC1672.03c	2	2	2	>SPCC1672.03c |||guanine deaminase |Schizosaccharomyces pombe|chr 3|||Manual	1	2	2	2	7.2	7.2	7.2	58.046	527	527	1.1168e-05	0.67725	0.82461	24.471	2	58659000	34647000	24012000				788	1913;2483	True;True	2044;2710	3068;4136	4397;5932	4397;5932
SPCC1672.06c	SPCC1672.06c	1	1	1	>SPCC1672.06c |asp1|vip1|inositol hexakisphosphate kinase/inositol pyrophosphate synthase |Schizosaccharomyces pombe|chr 3|||Manual	1	1	1	1	1	1	1	105.68	920	920	0.016176	NaN	NaN	NaN	1	11400000	7517100	3883200				789	1214	TRUE	1288	1980	2849	2849
SPCC1672.07	SPCC1672.07	3	3	3	>SPCC1672.07 |||U3 snoRNP-associated protein Utp21 |Schizosaccharomyces pombe|chr 3|||Manual	1	3	3	3	5.7	5.7	5.7	100.57	902	902	2.6958e-07	0.83655	0.90927	10.588	3	29279000	13894000	15385000				790	557;2512;3193	True;True;True	588;2741;3473	962;4182;5185	1386;5994;7392	1386;5994;7392
SPCC1672.12c	SPCC1672.12c	1	1	1	>SPCC1672.12c |get4||ER membrane insertion protein Get4 |Schizosaccharomyces pombe|chr 3|||Manual	1	1	1	1	5	5	5	34.352	303	303	9.0802e-11	NaN	NaN	NaN	1	53384000	29671000	23713000				791	225	TRUE	238	361	510;511	511
SPCC1682.01	SPCC1682.01	1	1	1	>SPCC1682.01 |qcr9||ubiquinol-cytochrome-c reductase complex subunit 9 |Schizosaccharomyces pombe|chr 3|||Manual	1	1	1	1	15.3	15.3	15.3	9.7879	85	85	1.8673e-09	NaN	NaN	NaN	1	25024000	17264000	7759900				792	234	TRUE	248	373	526	526
SPCC1682.02c	SPCC1682.02c	2	2	2	>SPCC1682.02c |mcm3||MCM complex subunit Mcm3|Schizosaccharomyces pombe|chr 3|||Manual	1	2	2	2	1.7	1.7	1.7	97.48	879	879	2.3231e-07	1.0623	1.3361	79.755	2	44510000	23020000	21490000				793	2189;3092	True;True	2376;3365	3595;5039	5152;7190	5152;7190
SPCC1682.05c	SPCC1682.05c	2	2	2	>SPCC1682.05c |srp68||signal recognition particle subunit |Schizosaccharomyces pombe|chr 3|||Manual	1	2	2	2	3.7	3.7	3.7	67.859	597	597	6.0132e-08	0.4713	0.57558	6.0525	2	55707000	34171000	21536000				794	29;83	True;True	30;87	55;173	83;84;252	83;252
SPCC1682.10	SPCC1682.10	1	1	1	>SPCC1682.10 |rpn8||19S proteasome regulatory subunit Rpn8 |Schizosaccharomyces pombe|chr 3|||Manual	1	1	1	1	4.9	4.9	4.9	35.595	324	324	7.9375e-32	NaN	NaN	NaN	0	0	0	0				795	317	TRUE	334	506	732	732
SPCC1682.12c	SPCC1682.12c	1	1	1	>SPCC1682.12c |ubp16||ubiquitin C-terminal hydrolase Ubp16|Schizosaccharomyces pombe|chr 3|||Manual	1	1	1	1	5	5	5	51.581	457	457	1.0121e-16	NaN	NaN	NaN	1	42710000	25477000	17233000				796	778	TRUE	824	1298	1865	1865
SPCC1682.16	SPCC1682.16	5	5	5	>SPCC1682.16 |rpt4||19S proteasome regulatory subunit Rpt4 |Schizosaccharomyces pombe|chr 3|||Manual	1	5	5	5	16.2	16.2	16.2	43.608	388	388	6.0507e-47	0.63597	0.78434	20.807	7	457690000	262240000	195450000				797	578;619;2866;3203;3594	True;True;True;True;True	610;656;3117;3484;3916	997;998;1064;1065;1066;1067;4697;5202;5826	1430;1431;1432;1530;1531;1532;1533;6698;6699;7414;8345	1431;1532;6699;7414;8345
SPCC16A11.02	SPCC16A11.02	4	4	4	>SPCC16A11.02 |utp13|SPCC63.16|U3 snoRNP-associated protein Utp13 |Schizosaccharomyces pombe|chr 3|||Manual	1	4	4	4	8.2	8.2	8.2	85.871	777	777	2.6654e-26	0.92552	1.1056	34.049	4	159560000	74858000	84706000				798	950;1341;1873;3156	True;True;True;True	1005;1430;2002;3434	1567;2195;3013;5137	2250;3149;3150;4323;7326	2250;3150;4323;7326
SPCC16A11.16c	SPCC16A11.16c	1	1	1	>SPCC16A11.16c |rpn1302|rpn13, rpn13b|19S proteasome regulatory subunit Rpn13b|Schizosaccharomyces pombe|chr 3|||Manual	1	1	1	1	4.6	4.6	4.6	43.902	388	388	1.1874e-22	NaN	NaN	NaN	0	0	0	0				799	1096	TRUE	1161	1804	2603	2603
SPCC16A11.17	SPCC16A11.17	1	1	1	>SPCC16A11.17 |mcm4|cdc21, SPCC24B10.01|MCM complex subunit Mcm4/Cdc21|Schizosaccharomyces pombe|chr 3|||Manual	1	1	1	1	1.3	1.3	1.3	101.54	911	911	3.6211e-07	NaN	NaN	NaN	1	15336000	8961000	6375100				800	940	TRUE	995	1554	2231	2231
SPCC16C4.09	SPCC16C4.09	2	2	2	>SPCC16C4.09 |sts5|orb4|RNB-like protein|Schizosaccharomyces pombe|chr 3|||Manual	1	2	2	2	2.8	2.8	2.8	117.6	1066	1066	1.6063e-14	0.82173	1.0577	31.825	2	52328000	24791000	27537000				801	1010;1126	True;True	1069;1198	1666;1855	2387;2680;2681;2682	2387;2681
SPCC16C4.13c;SPCC31H12.04c	SPCC16C4.13c;SPCC31H12.04c	2;2	2;2	2;2	>SPCC16C4.13c |rpl1201|rpl12-1, rpl12.1|60S ribosomal protein L12.1/L12A|Schizosaccharomyces pombe|chr 3|||Manual;>SPCC31H12.04c |rpl1202|rpl12-2, rpl12|60S ribosomal protein L12.1/L12A|Schizosaccharomyces pombe|chr 3|||Manual	2	2	2	2	12.1	12.1	12.1	17.666	165	165;165	7.5258e-24	0.79477	0.97301	2.8786	2	181180000	100260000	80927000				802	436;2379	True;True	460;2591	683;3921	991;5622	991;5622
SPCC16C4.15	SPCC16C4.15	1	1	1	>SPCC16C4.15 |rml2||mitochondrial ribosomal protein subunit L2 |Schizosaccharomyces pombe|chr 3|||Manual	1	1	1	1	5	5	5	40.246	362	362	1.7433e-05	NaN	NaN	NaN	1	38149000	23052000	15097000				803	1804	TRUE	1932	2923	4194;4195	4194
SPCC16C4.18c	SPCC16C4.18c	7	7	7	>SPCC16C4.18c |taf6|taf50|histone H4-like TAF Taf6, SAGA complex subunit|Schizosaccharomyces pombe|chr 3|||Manual	1	7	7	7	21	21	21	50.272	452	452	3.7722e-63	1.8096	2.2244	22.667	8	922930000	284060000	638870000				804	372;389;439;593;1348;3528;3529	True;True;True;True;True;True;True	390;391;411;463;628;1437;1438;3844;3845	574;575;606;688;689;1025;2203;2204;5738;5739	829;830;831;832;881;997;998;999;1478;3161;3162;3163;8222;8223	831;881;999;1478;3162;8222;8223	317;318;319	238;397;439
SPCC1739.13	SPCC1739.13	30	30	17	>SPCC1739.13 |ssa2||heat shock protein Ssa2 |Schizosaccharomyces pombe|chr 3|||Manual	1	30	30	17	49	49	26.3	70.232	647	647	0	0.86242	1.1002	18.488	62	25192000000	11553000000	13639000000				805	267;268;283;285;286;322;395;417;608;663;1268;1517;1598;1599;2008;2074;2075;2253;2354;2355;2433;2689;2690;2763;2764;3113;3169;3290;3380;3610	True;True;True;True;True;True;True;True;True;True;True;True;True;True;True;True;True;True;True;True;True;True;True;True;True;True;True;True;True;True	282;283;298;300;301;339;417;441;644;702;1347;1615;1616;1710;1711;2149;2150;2219;2220;2452;2563;2564;2565;2566;2656;2933;2934;3012;3013;3388;3389;3390;3447;3585;3682;3937	420;421;422;423;424;443;445;446;447;448;449;450;512;613;614;615;655;1048;1127;2069;2070;2459;2460;2461;2462;2463;2464;2465;2466;2597;2598;2599;2600;2601;3205;3206;3295;3296;3297;3725;3876;3877;3878;3879;3880;3881;4063;4442;4443;4444;4540;4541;5069;5070;5071;5072;5073;5074;5075;5076;5077;5150;5151;5152;5153;5364;5365;5366;5503;5504;5883	596;597;598;599;600;601;602;603;604;605;631;632;633;635;636;637;638;639;640;641;642;643;644;645;646;647;648;649;739;890;891;892;893;950;1510;1618;1619;2981;2982;2983;2984;3530;3531;3532;3533;3534;3535;3536;3537;3538;3539;3540;3541;3542;3543;3728;3729;3730;3731;3732;3733;3734;4603;4604;4735;4736;4737;4738;4739;5332;5545;5546;5547;5548;5549;5550;5551;5552;5553;5554;5555;5556;5557;5558;5831;5832;636…	597;605;633;639;649;739;893;950;1510;1618;2984;3538;3730;3734;4603;4737;4739;5332;5548;5556;5831;6364;6366;6495;6496;7236;7345;7659;7879;8429	60;320;321;322;323	59;85;120;123;516
SPCC1795.04c	SPCC1795.04c	2	2	2	>SPCC1795.04c |pre10||20S proteasome component alpha 7, Pre10 |Schizosaccharomyces pombe|chr 3|||Manual	1	2	2	2	7.5	7.5	7.5	28.031	253	253	0.00050488	0.91696	1.0821	2.1243	2	118510000	62363000	56151000				806	1074;1075	True;True	1136;1137	1759;1760	2526;2527	2526;2527
SPCC1795.11	SPCC1795.11	9	9	8	>SPCC1795.11 |sum3|ded1, slh3, moc2|translation initiation RNA helicase Sum3|Schizosaccharomyces pombe|chr 3|||Manual	1	9	9	8	28	28	28	69.758	636	636	5.644e-150	0.75619	0.92246	25.818	13	1339400000	704670000	634680000				807	413;571;759;930;2110;2148;3058;3059;3605	True;True;True;True;True;True;True;True;True	437;602;804;985;2258;2259;2314;3325;3326;3327;3932	647;648;649;650;651;984;1271;1542;3356;3357;3358;3485;4982;4983;4984;4985;4986;4987;5876	939;940;941;942;943;944;1414;1822;1823;2216;4820;4821;4822;4993;7109;7110;7111;7112;7113;7114;7115;7116;7117;7118;8420;8421	939;1414;1822;2216;4821;4993;7112;7118;8421	324;325;326	247;344;442
SPCC1795.12c	SPCC1795.12c	1	1	1	>SPCC1795.12c |||sequence orphan|Schizosaccharomyces pombe|chr 3|||Manual	1	1	1	1	11.6	11.6	11.6	13.316	112	112	0.00011902	NaN	NaN	NaN	1	13986000	5079500	8906800				808	2585	TRUE	2820	4289	6144	6144
SPCC18.14c	SPCC18.14c	4	4	4	>SPCC18.14c |rpp0||60S acidic ribosomal protein Rpp0 |Schizosaccharomyces pombe|chr 3|||Manual	1	4	4	4	22.1	22.1	22.1	33.565	312	312	2.1436e-39	0.72166	0.87662	20.408	5	542840000	279210000	263630000				809	901;966;3264;3801	True;True;True;True	956;1022;3556;4140	1500;1584;1585;5321;6163	2152;2153;2274;2275;2276;2277;7589;7590;8833;8834	2152;2277;7590;8834
SPCC1827.03c	SPCC1827.03c	5	5	5	>SPCC1827.03c |||acetyl-CoA ligase |Schizosaccharomyces pombe|chr 3|||Manual	1	5	5	5	20.3	20.3	20.3	56.274	512	512	5.4449e-44	1.0092	1.24	29.055	7	704900000	335150000	369750000				810	226;254;1566;2477;2722	True;True;True;True;True	239;269;1674;2704;2968	362;363;404;2552;2553;4128;4488	512;513;514;574;3666;3667;5924;6425;6426	512;574;3667;5924;6425
SPCC1827.06c	SPCC1827.06c	4	4	4	>SPCC1827.06c |||aspartate semialdehyde dehydrogenase |Schizosaccharomyces pombe|chr 3|||Manual	1	4	4	4	12.9	12.9	12.9	38.55	357	357	1.7088e-17	1.1324	1.0605	20.065	3	297640000	139950000	157690000				811	597;712;2570;3421	True;True;True;True	632;755;2803;3726	1031;1199;4266;5562	1486;1725;1726;6110;6111;7966	1486;1726;6111;7966
SPCC1840.02c;SPAC24C9.07c	SPCC1840.02c	10;2	10;2	8;0	>SPCC1840.02c |bgs4|orb11, cwg1|1,3-beta-glucan synthase subunit Bgs4|Schizosaccharomyces pombe|chr 3|||Manual	2	10	10	8	5.7	5.7	4.9	225.18	1955	1955;1894	4.1238e-24	0.64129	0.76051	16.559	9	149380000	91145000	58239000				812	800;1282;1338;1774;1782;1918;1948;2273;3260;3613	True;True;True;True;True;True;True;True;True;True	846;1363;1426;1901;1909;2049;2086;2472;3551;3940	1327;2094;2190;2884;2885;2894;2895;3075;3127;3749;5313;5886	1914;3017;3144;4139;4140;4150;4151;4406;4487;5370;7581;8434;8435	1914;3017;3144;4140;4151;4406;4487;5370;7581;8434
SPCC1840.09	SPCC1840.09	1	1	1	>SPCC1840.09 |||NAD dependent epimerase/dehydratase family protein|Schizosaccharomyces pombe|chr 3|||Manual	1	1	1	1	6.9	6.9	6.9	29.919	276	276	2.0305e-11	NaN	NaN	NaN	1	54099000	26002000	28097000				813	401	TRUE	424	625	907;908	907
SPCC188.02	SPCC188.02	1	1	1	>SPCC188.02 |par1||protein phosphatase regulatory subunit Par1|Schizosaccharomyces pombe|chr 3|||Manual	1	1	1	1	2.6	2.6	2.6	63.345	548	548	2.7374e-11	NaN	NaN	NaN	0	0	0	0				814	515	TRUE	544	877	1265	1265
SPCC188.06c	SPCC188.06c	1	1	1	>SPCC188.06c |srp54||signal recognition particle subunit Srp54|Schizosaccharomyces pombe|chr 3|||Manual	1	1	1	1	4.2	4.2	4.2	56.697	522	522	1.193e-06	NaN	NaN	NaN	1	43145000	21658000	21487000				815	1859	TRUE	1988	2998	4306	4306
SPCC18B5.01c	SPCC18B5.01c	7	7	7	>SPCC18B5.01c |bfr1|hba2, SPCPJ732.04c|brefeldin A efflux transporter Bfr1|Schizosaccharomyces pombe|chr 3|||Manual	1	7	7	7	5.2	5.2	5.2	171.75	1530	1530	5.8089e-50	0.9536	1.1489	13.787	5	226400000	111930000	114480000				816	343;600;932;1092;2309;3108;3425	True;True;True;True;True;True;True	361;635;987;1157;2509;3382;3730	541;1036;1544;1796;1797;3797;5060;5568	779;1494;2218;2590;2591;5433;7219;7974	779;1494;2218;2590;5433;7219;7974
SPCC18B5.03	SPCC18B5.03	1	1	1	>SPCC18B5.03 |wee1||M phase inhibitor protein kinase Wee1|Schizosaccharomyces pombe|chr 3|||Manual	1	1	1	1	3.2	3.2	3.2	96.26	877	877	2.1818e-24	NaN	NaN	NaN	1	93839000	51806000	42034000				817	1744	TRUE	1869	2841	4082;4083	4082
SPCC18B5.05c	SPCC18B5.05c	1	1	1	>SPCC18B5.05c |||phosphomethylpyrimidine kinase |Schizosaccharomyces pombe|chr 3|||Manual	1	1	1	1	4.3	4.3	4.3	35.839	327	327	6.4596e-13	NaN	NaN	NaN	1	21693000	8413600	13279000				818	2714	TRUE	2960	4480	6413;6414;6415	6413
SPCC1906.01	SPCC1906.01	8	8	8	>SPCC1906.01 |mpg1||mannose-1-phosphate guanyltransferase Mpg1|Schizosaccharomyces pombe|chr 3|||Manual	1	8	8	8	42.1	42.1	42.1	39.718	363	363	1.8181e-103	0.63738	0.7341	20.541	12	1549100000	921970000	627100000				819	123;424;501;1086;1230;2480;2956;3384	True;True;True;True;True;True;True;True	128;448;530;1151;1306;2707;3214;3687	226;667;835;836;1788;1789;2004;2005;4132;4840;5509;5510	321;966;967;968;1213;1214;1215;1216;2571;2572;2573;2574;2575;2576;2881;2882;2883;2884;5928;6912;6913;7885;7886	321;966;1214;2575;2882;5928;6912;7885	327	218
SPCC191.02c	SPCC191.02c	3	3	3	>SPCC191.02c ||SPCC417.14c|acetyl-CoA ligase |Schizosaccharomyces pombe|chr 3|||Manual	1	3	3	3	6.9	6.9	6.9	73.035	662	662	3.3009e-07	0.44403	0.57152	44.355	2	295740000	197620000	98117000				820	498;1052;1118	True;True;True	527;1114;1189	831;1729;1843	1208;2485;2486;2661;2662	1208;2486;2662
SPCC1919.09	SPCC1919.09	1	1	1	>SPCC1919.09 |tif6||translation initiation factor eIF6|Schizosaccharomyces pombe|chr 3|||Manual	1	1	1	1	10.2	10.2	10.2	26.232	244	244	6.9914e-08	NaN	NaN	NaN	1	40176000	25469000	14707000				821	2537	TRUE	2766	4212;4213	6033;6034	6033
SPCC1919.10c	SPCC1919.10c	10	10	10	>SPCC1919.10c |myo52||myosin type V|Schizosaccharomyces pombe|chr 3|||Manual	1	10	10	10	8.9	8.9	8.9	175.15	1516	1516	5.2042e-84	0.64678	0.78515	13.5	9	459250000	266640000	192610000				822	2113;2219;2708;2715;2716;2962;3199;3200;3576;3708	True;True;True;True;True;True;True;True;True;True	2263;2414;2954;2961;2962;3222;3480;3481;3896;4041	3367;3653;4472;4473;4481;4482;4850;5198;5199;5802;6025	4841;5233;6398;6399;6400;6416;6417;6418;6924;7409;7410;7411;8313;8628	4841;5233;6398;6416;6418;6924;7409;7410;8313;8628	328	397
SPCC1919.15	SPCC1919.15	2	2	2	>SPCC1919.15 |brl1|SPCC790.01, rfp2|ubiquitin-protein ligase E3 Brl1|Schizosaccharomyces pombe|chr 3|||Manual	1	2	2	2	4	4	4	80.722	692	692	4.3398e-15	0.32407	0.36224	19.514	2	47148000	35139000	12009000				823	1716;2049	True;True	1838;2194	2798;3258	4017;4685	4017;4685
SPCC23B6.01c	SPCC23B6.01c	2	2	2	>SPCC23B6.01c |||oxysterol binding protein |Schizosaccharomyces pombe|chr 3|||Manual	1	2	2	2	6.9	6.9	6.9	54.647	479	479	9.9337e-12	NaN	NaN	NaN	0	0	0	0				824	732;1578	True;True	775;1688	1229;2571	1760;3689	1760;3689
SPCC23B6.05c	SPCC23B6.05c	1	1	1	>SPCC23B6.05c |ssb3|rpa3|DNA replication factor A subunit Ssb3|Schizosaccharomyces pombe|chr 3|||Manual	1	1	1	1	6.7	6.7	6.7	11.793	104	104	0.04267	NaN	NaN	NaN	1	8266800	6714800	1552000				825	2072	TRUE	2217	3292	4732	4732
SPCC24B10.08c	SPCC24B10.08c	3	3	3	>SPCC24B10.08c |ada2||SAGA complex subunit Ada2|Schizosaccharomyces pombe|chr 3|||Manual	1	3	3	3	11.7	11.7	11.7	50.477	437	437	2.2479e-57	1.8834	2.016	16.114	3	968300000	329840000	638460000				826	1087;1968;3328	True;True;True	1152;2107;3626	1790;1791;3153;5431	2577;2578;2579;2580;2581;2582;4523;4524;7763	2582;4523;7763
SPCC24B10.09;SPBC839.05c	SPCC24B10.09;SPBC839.05c	3;2	3;2	3;2	>SPCC24B10.09 |rps1702|rps17-2, rps17|40S ribosomal protein S17 |Schizosaccharomyces pombe|chr 3|||Manual;>SPBC839.05c |rps1701|rps17-1|40S ribosomal protein S17 |Schizosaccharomyces pombe|chr 2|||Manual	2	3	3	3	31.1	31.1	31.1	15.534	132	132;131	1.4742e-11	0.78235	1.1444	17.788	3	446290000	231870000	214420000				827	195;1153;3640	True;True;True	206;1225;3968	323;324;1889;5922	458;459;2726;8481	459;2726;8481
SPCC24B10.21	SPCC24B10.21	2	2	2	>SPCC24B10.21 |tpi1|tpi|triosephosphate isomerase|Schizosaccharomyces pombe|chr 3|||Manual	1	2	2	2	16.9	16.9	16.9	27.227	249	249	2.0385e-23	0.84207	0.96536	35.522	3	331250000	171140000	160120000				828	694;1458	True;True	735;1553	1166;2354;2355	1670;3377;3378;3379	1670;3377
SPCC285.03	SPCC285.03	2	2	2	>SPCC285.03 |||ATP-dependent RNA helicase Dbp6 |Schizosaccharomyces pombe|chr 3|||Manual	1	2	2	2	4.1	4.1	4.1	68.344	604	604	2.5202e-06	NaN	NaN	NaN	1	28220000	16365000	11855000				829	2319;3215	True;True	2519;3497	3808;5220	5446;7438	5446;7438
SPCC285.08	SPCC285.08	1	1	1	>SPCC285.08 |ret2||coatomer delta subunit Ret2 |Schizosaccharomyces pombe|chr 3|||Manual	1	1	1	1	7.1	7.1	7.1	27.097	240	240	9e-06	0.78035	0.95434	3.7975	2	179440000	95398000	84044000				830	3585	TRUE	3906	5814;5815	8329;8330	8330
SPCC285.14	SPCC285.14	1	1	1	>SPCC285.14 |trs130||TRAPP complex subunit Trs130 |Schizosaccharomyces pombe|chr 3|||Manual	1	1	1	1	1.3	1.3	1.3	132.87	1150	1150	0.00026057	NaN	NaN	NaN	1	29713000	15445000	14268000				831	3512	TRUE	3828	5720	8197	8197
SPCC290.03c	SPCC290.03c	1	1	1	>SPCC290.03c |nup186||nucleoporin Nup186|Schizosaccharomyces pombe|chr 3|||Manual	1	1	1	1	0.7	0.7	0.7	186.41	1647	1647	5.4951e-05	NaN	NaN	NaN	0	0	0	0				832	2232	TRUE	2428	3670	5259	5259
SPCC306.08c	SPCC306.08c	5	5	5	>SPCC306.08c |||malate dehydrogenase |Schizosaccharomyces pombe|chr 3|||Manual	1	5	5	5	24	24	24	35.787	341	341	4.7111e-24	0.96885	1.0434	80.816	5	508460000	283650000	224810000				833	214;839;3366;3793;3794	True;True;True;True;True	226;888;3668;4132;4133	348;1380;5485;6152;6153	495;1984;7849;7850;8814;8815;8816	495;1984;7849;8814;8816
SPCC306.09c	SPCC306.09c	1	1	1	>SPCC306.09c |cap1|cap|adenylyl cyclase-associated protein Cap1|Schizosaccharomyces pombe|chr 3|||Manual	1	1	1	1	2.5	2.5	2.5	60.243	551	551	3.0071e-06	NaN	NaN	NaN	1	11791000	7725200	4066300				834	3043	TRUE	3310	4962	7082	7082
SPCC31H12.05c	SPCC31H12.05c	1	1	1	>SPCC31H12.05c |sds21||serine/threonine protein phosphatase Sds21|Schizosaccharomyces pombe|chr 3|||Manual	1	1	1	1	3.4	3.4	3.4	36.829	322	322	4.0725e-05	NaN	NaN	NaN	1	14931000	7394100	7536900				835	1290	TRUE	1371	2106	3033	3033
SPCC31H12.07	SPCC31H12.07	1	1	1	>SPCC31H12.07 |sec231|sec23a, SPCC5E4.01|COPII cargo receptor subunit Sec23a |Schizosaccharomyces pombe|chr 3|||Manual	1	1	1	1	2.2	2.2	2.2	84.844	759	759	1.1435e-05	NaN	NaN	NaN	1	54423000	29516000	24908000				836	953	TRUE	1009	1571	2255	2255
SPCC320.10	SPCC320.10	1	1	1	>SPCC320.10 |srp72||signal recognition particle subunit Srp72 |Schizosaccharomyces pombe|chr 3|||Manual	1	1	1	1	2	2	2	63.28	561	561	5.2629e-07	NaN	NaN	NaN	1	23465000	13623000	9841900				837	2284	TRUE	2483	3764	5387;5388	5387
SPCC330.09	SPCC330.09	1	1	1	>SPCC330.09 |||rRNA processing protein Enp2 |Schizosaccharomyces pombe|chr 3|||Manual	1	1	1	1	2.7	2.7	2.7	72.238	634	634	0.00012042	NaN	NaN	NaN	1	33704000	14207000	19497000				838	574	TRUE	605	988	1418	1418
SPCC330.12c	SPCC330.12c	1	1	1	>SPCC330.12c |sdh3||succinate dehydrogenase |Schizosaccharomyces pombe|chr 3|||Manual	1	1	1	1	8.9	8.9	8.9	20.136	180	180	0.00020098	NaN	NaN	NaN	1	10560000	6397400	4162300				839	816	TRUE	864	1350	1946	1946
SPCC338.13	SPCC338.13	1	1	1	>SPCC338.13 |cog4||Golgi transport complex subunit Cog4 |Schizosaccharomyces pombe|chr 3|||Manual	1	1	1	1	1.5	1.5	1.5	85.349	738	738	0.00022329	NaN	NaN	NaN	0	0	0	0				840	820	TRUE	868	1354	1951	1951
SPCC338.15	SPCC338.15	2	2	2	>SPCC338.15 |wbp1||dolichyl-di-phosphooligosaccharide-protein glycotransferase subunit Wbp1 |Schizosaccharomyces pombe|chr 3|||Manual	1	2	2	2	12.1	12.1	12.1	48.898	437	437	2.7605e-21	0.83869	0.82135	9.0695	2	127820000	64066000	63754000				841	3085;3423	True;True	3358;3728	5032;5564;5565	7182;7968;7969;7970	7182;7969
SPCC364.03	SPCC364.03	3	3	2	>SPCC364.03 |rpl1702|rpl17-2, rpl17|60S ribosomal protein L17 |Schizosaccharomyces pombe|chr 3|||Manual	1	3	3	2	23	23	10.2	20.827	187	187	3.3576e-37	0.79702	0.77784	3.0641	3	318800000	165570000	153230000				842	3020;3021;3608	True;True;True	3285;3286;3935	4933;4934;5881	7042;7043;7044;8427	7042;7043;8427
SPCC364.07	SPCC364.07	2	2	2	>SPCC364.07 ||SPCC4G3.01|D-3 phosphoglycerate dehydrogenase |Schizosaccharomyces pombe|chr 3|||Manual	1	2	2	2	7.3	7.3	7.3	50.882	466	466	2.074e-18	1.459	1.7808	16.058	2	37544000	12545000	24999000				843	3003;3765	True;True	3265;4102	4904;4905;6106	6999;7000;7001;8746	7000;8746
SPCC417.07c	SPCC417.07c	46	46	46	>SPCC417.07c |mto1|mbo1, mod20|MT organizer Mto1|Schizosaccharomyces pombe|chr 3|||Manual	1	46	46	46	28.9	28.9	28.9	128.47	1115	1115	0	0.90881	1.1228	26.034	160	66208000000	30679000000	35528000000				844	67;386;387;388;511;512;513;550;551;695;696;1284;1405;1406;1407;1543;1544;1545;1591;1607;2070;2101;2102;2115;2116;2123;2144;2169;2210;2225;2369;2404;2438;2489;2504;2540;2541;2564;2568;2901;2902;3219;3239;3240;3252;3825	True;True;True;True;True;True;True;True;True;True;True;True;True;True;True;True;True;True;True;True;True;True;True;True;True;True;True;True;True;True;True;True;True;True;True;True;True;True;True;True;True;True;True;True;True;True	71;406;407;408;409;410;540;541;542;581;582;736;737;738;739;1365;1497;1498;1499;1649;1650;1651;1652;1653;1702;1719;1720;2215;2248;2249;2250;2265;2266;2267;2268;2269;2270;2279;2309;2310;2345;2346;2347;2348;2404;2420;2581;2622;2661;2716;2717;2732;2733;2769;2770;2797;2801;3152;3153;3154;3501;3502;3528;3529;3530;3531;3543;4166	154;592;593;594;595;596;597;598;599;600;601;602;603;604;605;849;850;851;852;853;854;855;856;857;858;859;860;861;862;863;864;865;866;867;868;869;870;871;872;873;874;947;948;949;950;951;952;953;954;1167;1168;1169;1170;1171;1172;1173;1174;1175;1176;2096;2284;2285;2286;2287;2511;2512;2513;2514;2515;2516;2517;2518;2519;2520;2521;2522;2523;2588;2611;2612;2613;3287;3288;3289;3339;3340;3341;3342;3343;334…	221;854;855;856;857;858;859;860;861;862;863;864;865;866;867;868;869;870;871;872;873;874;875;876;877;878;879;880;1232;1233;1234;1235;1236;1237;1238;1239;1240;1241;1242;1243;1244;1245;1246;1247;1248;1249;1250;1251;1252;1253;1254;1255;1256;1257;1258;1259;1260;1261;1262;1359;1360;1361;1362;1363;1364;1365;1366;1367;1368;1369;1370;1371;1372;1671;1672;1673;1674;1675;1676;1677;1678;1679;1680;1681;1682;16…	221;854;860;880;1234;1236;1261;1360;1365;1675;1688;3019;3271;3273;3277;3611;3622;3629;3714;3750;4726;4801;4809;4882;4893;4929;4988;5102;5216;5248;5586;5733;5840;5944;5975;6038;6041;6096;6103;6773;6777;7450;7522;7529;7561;8892	329;330;331;332;333;334;335;336;337;338	226;291;302;389;439;443;474;491;492;524
SPCC417.08	SPCC417.08	18	18	18	>SPCC417.08 |tef3||translation elongation factor eEF3|Schizosaccharomyces pombe|chr 3|||Manual	1	18	18	18	30.7	30.7	30.7	115.8	1047	1047	0	0.72808	0.82599	68.836	26	4405800000	2501100000	1904700000				845	159;160;175;203;325;525;542;933;1171;1172;1365;1514;1884;2061;2071;3426;3523;3712	True;True;True;True;True;True;True;True;True;True;True;True;True;True;True;True;True;True	168;169;185;215;342;555;572;988;1243;1244;1457;1612;2013;2206;2216;3731;3839;4046;4047	273;274;275;295;334;335;518;519;911;934;935;1545;1912;1913;1914;1915;2228;2454;3027;3028;3029;3272;3290;3291;5569;5732;6030;6031;6032	386;387;388;389;390;417;418;419;476;477;478;748;749;750;751;1313;1314;1315;1344;1345;1346;2219;2220;2760;2761;2762;2763;2764;2765;2766;2767;3195;3524;3525;4341;4342;4343;4344;4703;4728;4729;4730;4731;7975;7976;8212;8213;8214;8638;8639;8640	387;389;417;477;751;1314;1346;2219;2761;2762;3195;3524;4344;4703;4731;7976;8213;8640	339;340	839;978
SPCC4B3.03c	SPCC4B3.03c	1	1	1	>SPCC4B3.03c |||mitochondrial morphology protein |Schizosaccharomyces pombe|chr 3|||Manual	1	1	1	1	3.5	3.5	3.5	74.305	679	679	0.0019962	NaN	NaN	NaN	1	18117000	12754000	5362700				846	442	TRUE	466	693	1004	1004
SPCC4B3.04c	SPCC4B3.04c	2	2	2	>SPCC4B3.04c |nte1||lysophospholipase |Schizosaccharomyces pombe|chr 3|||Manual	1	2	2	2	1.4	1.4	1.4	147.84	1316	1316	0.00018025	NaN	NaN	NaN	1	16645000	9757300	6887300				847	2055;3694	True;True	2200;4026	3266;6003	4696;8597	4696;8597
SPCC4G3.14	SPCC4G3.14	2	2	2	>SPCC4G3.14 |mdj1||mitochondrial DNAJ domain protein Mdj1 |Schizosaccharomyces pombe|chr 3|||Manual	1	2	2	2	3.2	3.2	3.2	57.188	528	528	5.4266e-32	0.71595	0.87386	17.223	3	79790000	45982000	33807000				848	2851;2852	True;True	3101;3102	4678;4679;4680;4681	6674;6675;6676;6677	6675;6677
SPCC4G3.15c	SPCC4G3.15c	1	1	1	>SPCC4G3.15c |not2||CCR4-Not complex subunit Not2 |Schizosaccharomyces pombe|chr 3|||Manual	1	1	1	1	4.6	4.6	4.6	34.478	306	306	0.001763	NaN	NaN	NaN	1	37499000	20080000	17418000				849	3664	TRUE	3994	5955	8530	8530
SPCC550.14	SPCC550.14	3	3	3	>SPCC550.14 |vgl1||vigilin |Schizosaccharomyces pombe|chr 3|||Manual	1	3	3	3	4.2	4.2	4.2	142.61	1291	1291	1.1e-45	1.3024	1.4415	13.114	3	141860000	53697000	88164000				850	48;2248;2346	True;True;True	51;2446;2554	83;3713;3863	118;119;5315;5316;5523	118;5315;5523
SPCC553.02	SPCC553.02	1	1	1	>SPCC553.02 |||glutamine-dependent NAD|Schizosaccharomyces pombe|chr 3|||Manual	1	1	1	1	1.3	1.3	1.3	79.519	700	700	0.0018558	NaN	NaN	NaN	1	16360000	6684100	9675500				851	3688	TRUE	4020	5997	8590	8590
SPCC553.06	SPCC553.06	2	2	2	>SPCC553.06 |swp1||oligosaccharyltransferase delta subunit Swp1 |Schizosaccharomyces pombe|chr 3|||Manual	1	2	2	2	8.5	8.5	8.5	29.329	271	271	2.3392e-06	NaN	NaN	NaN	1	115360000	51822000	63536000				852	1714;2915	True;True	1836;3168	2796;4769	4014;4015;6806	4015;6806
SPCC576.03c	SPCC576.03c	1	1	1	>SPCC576.03c |tpx1||thioredoxin peroxidase Tpx1|Schizosaccharomyces pombe|chr 3|||Manual	1	1	1	1	9.4	9.4	9.4	21.191	192	192	1.9915e-05	NaN	NaN	NaN	1	29981000	15758000	14223000				853	526	TRUE	556	912	1316	1316
SPCC576.07	SPCC576.07	1	1	1	>SPCC576.07 |ret3||coatomer zeta subunit |Schizosaccharomyces pombe|chr 3|||Manual	1	1	1	1	5.8	5.8	5.8	21.686	190	190	4.2918e-16	NaN	NaN	NaN	0	0	0	0				854	2790	TRUE	3040	4570;4571	6533;6534	6534
SPCC576.08c	SPCC576.08c	7	7	7	>SPCC576.08c |rps2||40S ribosomal protein S2 |Schizosaccharomyces pombe|chr 3|||Manual	1	7	7	7	30.8	30.8	30.8	27.637	253	253	1.82e-54	0.79303	0.92434	11.694	10	528340000	264790000	263550000				855	88;631;750;838;1050;2572;3192	True;True;True;True;True;True;True	92;669;795;887;1112;2805;3472	178;179;180;181;1083;1255;1256;1378;1379;1727;4268;5184	257;258;259;260;1553;1798;1799;1800;1801;1802;1981;1982;1983;2482;6113;7391	257;1553;1801;1983;2482;6113;7391
SPCC576.09	SPCC576.09	3	3	3	>SPCC576.09 |rps20||40S ribosomal protein S20 |Schizosaccharomyces pombe|chr 3|||Manual	1	3	3	3	32.2	32.2	32.2	13.544	118	118	1.2821e-09	1.2239	1.5004	4.6879	3	43424000	18391000	25033000				856	1391;2291;2941	True;True;True	1483;2490;3199	2264;3774;4820	3247;5398;5399;6891	3247;5399;6891
SPCC576.10c	SPCC576.10c	4	4	4	>SPCC576.10c |rpt3||19S proteasome regulatory subunit Rpt3 |Schizosaccharomyces pombe|chr 3|||Manual	1	4	4	4	22.6	22.6	22.6	43.552	389	389	1.6693e-71	0.73425	0.86283	11.652	6	908810000	477730000	431080000				857	592;1332;1385;2474	True;True;True;True	627;1419;1477;2701	1023;1024;2181;2182;2254;4124	1475;1476;1477;3130;3131;3132;3232;3233;5916;5917	1475;3132;3232;5917
SPCC584.01c	SPCC584.01c	18	18	18	>SPCC584.01c |||sulfite reductase NADPH flavoprotein subunit |Schizosaccharomyces pombe|chr 3|||Manual	1	18	18	18	31.8	31.8	31.8	111.35	1006	1006	5.7064e-278	0.81029	0.96279	21.597	21	1753400000	901640000	851740000				858	62;77;205;398;805;1213;1254;1564;1962;2032;2033;2238;2971;3004;3131;3257;3299;3300	True;True;True;True;True;True;True;True;True;True;True;True;True;True;True;True;True;True	65;81;217;420;851;1287;1332;1672;2101;2175;2176;2434;3231;3266;3409;3548;3595;3596	100;166;337;619;1333;1979;2048;2549;2550;3146;3233;3234;3700;4863;4906;5104;5105;5309;5310;5382;5383;5384	148;238;239;480;898;899;1923;1924;2847;2848;2944;3662;3663;3664;4512;4641;4642;4643;5297;6942;6943;7002;7003;7004;7281;7282;7572;7573;7574;7575;7681;7682;7683	148;239;480;898;1923;2848;2944;3664;4512;4641;4643;5297;6942;7004;7282;7572;7681;7683
SPCC584.04	SPCC584.04	1	1	1	>SPCC584.04 |sup35|erf3|translation release factor class II eRF3|Schizosaccharomyces pombe|chr 3|||Manual	1	1	1	1	2.6	2.6	2.6	72.555	662	662	0.00072782	NaN	NaN	NaN	1	62380000	27397000	34983000				859	2983	TRUE	3244	4878	6964;6965	6965
SPCC5E4.03c	SPCC5E4.03c	12	12	12	>SPCC5E4.03c |taf5|taf72|SAGA complex subunit/TATA-binding protein associated factor/transcription factor TFIID complex subunit Taf5|Schizosaccharomyces pombe|chr 3|||Manual	1	12	12	12	40.9	40.9	40.9	72.38	643	643	1.7572e-175	1.6923	1.8821	13.514	15	2232200000	700780000	1531400000				860	500;1013;1014;1300;1800;1905;2446;3087;3238;3272;3392;3405	True;True;True;True;True;True;True;True;True;True;True;True	529;1072;1073;1382;1928;2036;2671;3360;3527;3565;3696;3709	833;834;1669;1670;1671;2140;2917;2918;3057;4086;4087;5034;5275;5331;5523;5541	1210;1211;1212;2391;2392;2393;2394;2395;3074;3075;4181;4182;4183;4184;4185;4381;5863;5864;5865;7184;7518;7519;7520;7603;7604;7914;7915;7939;7940	1212;2393;2395;3074;4184;4381;5864;7184;7520;7603;7914;7940	341;342	31;520
SPCC5E4.07	SPCC5E4.07	3	3	1	>SPCC5E4.07 |rpl2802|rpl28-2, rpl28|60S ribosomal protein L27/L28|Schizosaccharomyces pombe|chr 3|||Manual	1	3	3	1	35.1	35.1	14.9	16.653	148	148	5.3376e-30	0.58766	0.69399	19.967	5	537990000	305130000	232860000				861	2349;2371;2742	True;True;True	2557;2583;2989	3866;3867;3905;3906;3907;4515	5527;5528;5529;5530;5594;5595;5596;5597;6460	5529;5595;6460
SPCC61.02	SPCC61.02	5	5	5	>SPCC61.02 |spt3||SAGA complex subunit Spt3|Schizosaccharomyces pombe|chr 3|||Manual	1	5	5	5	14.7	14.7	14.7	35.632	307	307	1.0502e-63	1.6803	2.1627	14.37	8	1645500000	505770000	1139700000				862	983;2798;2799;3245;3246	True;True;True;True;True	1040;3048;3049;3536;3537	1613;4583;4584;4585;5288;5289;5290;5291;5292	2311;6549;6550;6551;6552;6553;6554;7539;7540;7541;7542;7543;7544;7545;7546	2311;6549;6551;7539;7543	343	44
SPCC613.05c	SPCC613.05c	2	2	2	>SPCC613.05c |rpl35||60S ribosomal protein L35|Schizosaccharomyces pombe|chr 3|||Manual	1	2	2	2	19.7	19.7	19.7	14.302	122	122	2.1286e-78	0.70579	0.94056	2.4427	2	427610000	220100000	207500000				863	2527;2528	True;True	2756;2757	4199;4200	6018;6019;6020	6018;6019
SPCC613.06	SPCC613.06	3	3	2	>SPCC613.06 |rpl902|rpl9-2|60S ribosomal protein L9|Schizosaccharomyces pombe|chr 3|||Manual	1	3	3	2	32.3	32.3	20.6	21.382	189	189	9.635e-38	0.67199	0.82461	18.887	4	332020000	219810000	112210000				864	986;2090;3073	True;True;True	1044;2236;3341;3342	1629;3322;5008;5009;5010	2333;4771;7151;7152;7153	2333;4771;7151	344	78
SPCC613.10	SPCC613.10	3	3	3	>SPCC613.10 |qcr2||ubiquinol-cytochrome-c reductase complex core protein Qcr2 |Schizosaccharomyces pombe|chr 3|||Manual	1	3	3	3	12	12	12	45.651	426	426	2.6744e-24	1.0474	1.2822	16.207	3	127250000	66813000	60436000				865	740;746;898	True;True;True	785;791;952	1241;1249;1250;1495	1779;1791;1792;2145;2146	1779;1791;2145
SPCC622.09	SPCC622.09	3	3	3	>SPCC622.09 |htb1||histone H2B Htb1|Schizosaccharomyces pombe|chr 3|||Manual	1	3	3	3	22.2	22.2	22.2	13.819	126	126	5.4923e-35	1.5516	1.9002	25.751	3	6358400000	2107100000	4251400000				866	1315;1316;1793	True;True;True	1401;1402;1921	2160;2161;2909	3101;3102;3103;3104;3105;4170;4171	3101;3105;4170
SPCC622.11	SPCC622.11	1	1	1	>SPCC622.11 |||LMBR1-like membrane protein|Schizosaccharomyces pombe|chr 3|||Manual	1	1	1	1	1.4	1.4	1.4	64.825	562	562	0.077881	NaN	NaN	NaN	0	0	0	0	+			867	1349	TRUE	1439	2205	3164	3164	345	312
SPCC622.12c	SPCC622.12c	8	8	8	>SPCC622.12c |gdh1||NADP-specific glutamate dehydrogenase Gdh1 |Schizosaccharomyces pombe|chr 3|||Manual	1	8	8	8	22.6	22.6	22.6	48.789	451	451	2.7697e-57	1.0083	1.024	11.524	6	539770000	266710000	273070000				868	699;731;1102;1652;3054;3055;3363;3518	True;True;True;True;True;True;True;True	742;774;1168;1169;1767;3321;3322;3665;3834	1181;1228;1813;1814;1815;1816;2678;4978;4979;5479;5727	1698;1758;1759;2612;2613;2614;2615;2616;3853;3854;7104;7105;7843;8205	1698;1758;2614;3854;7104;7105;7843;8205	346	184
SPCC622.13c	SPCC622.13c	3	3	3	>SPCC622.13c |tti1||Tel Two Interacting protein 1|Schizosaccharomyces pombe|chr 3|||Manual	1	3	3	3	4.9	4.9	4.9	124.76	1098	1098	1.2072e-38	0.88893	1.1826	8.8241	3	105900000	60118000	45779000				869	1961;2744;3211	True;True;True	2100;2991;3493	3145;4517;5215	4510;4511;6462;6463;7429;7430	4510;6463;7429
SPCC622.18	SPCC622.18	2	2	2	>SPCC622.18 |rpl6||60S ribosomal protein L6 |Schizosaccharomyces pombe|chr 3|||Manual	1	2	2	2	13.3	13.3	13.3	21.248	195	195	1.591e-13	0.56098	0.68721	26.811	2	363370000	190220000	173160000				870	279;2197	True;True	294;2388	438;439;3617	624;625;626;5179	626;5179
SPCC663.04	SPCC663.04	3	3	3	>SPCC663.04 |rpl39||60S ribosomal protein L39|Schizosaccharomyces pombe|chr 3|||Manual	1	3	3	3	43.1	43.1	43.1	6.3084	51	51	4.1632e-08	0.70322	0.85836	14.642	5	1162500000	621050000	541500000				871	1995;2509;3123	True;True;True	2134;2738;3400	3188;3189;4178;4179;5091	4577;4578;4579;5987;5988;5989;5990;7263;7264	4577;5987;7264
SPCC736.12c	SPCC736.12c	1	1	1	>SPCC736.12c |mmi1||YTH family RNA binding protein Mmi1|Schizosaccharomyces pombe|chr 3|||Manual	1	1	1	1	4.7	4.7	4.7	54.538	488	488	6.5818e-08	NaN	NaN	NaN	1	20431000	13639000	6792300				872	3075	TRUE	3344	5012	7155	7155
SPCC737.08	SPCC737.08	11	11	11	>SPCC737.08 |||midasin |Schizosaccharomyces pombe|chr 3|||Manual	1	11	11	11	3.2	3.2	3.2	537.78	4717	4717	1.6206e-42	0.71086	0.83545	49.142	7	194040000	89276000	104760000				873	218;666;1411;1440;1722;1832;2613;2872;3291;3302;3698	True;True;True;True;True;True;True;True;True;True;True	231;705;1503;1535;1844;1960;2851;3123;3586;3598;4030	354;1130;2293;2333;2805;2969;4327;4703;5367;5386;6009	503;1622;3287;3344;4030;4268;6196;6197;6706;7660;7661;7685;8603	503;1622;3287;3344;4030;4268;6196;6706;7660;7685;8603
SPCC737.09c	SPCC737.09c	2	2	2	>SPCC737.09c |hmt1|SPCC74.08c|ATP-binding cassette-type vacuolar membrane transporter Hmt1|Schizosaccharomyces pombe|chr 3|||Manual	1	2	2	2	3.6	3.6	3.6	93.993	830	830	3.3608e-07	0.69518	0.79986	35.34	2	28885000	15459000	13426000				874	1132;3717	True;True	1204;4052	1862;6040	2692;8656	2692;8656
SPCC74.01	SPCC74.01	1	1	1	>SPCC74.01 |sly1||SNARE binding protein Sly1 |Schizosaccharomyces pombe|chr 3|||Manual	1	1	1	1	1.9	1.9	1.9	71.664	639	639	3.6018e-05	NaN	NaN	NaN	1	23088000	11744000	11344000				875	207	TRUE	219	341	486	486
SPCC74.06	SPCC74.06	4	4	4	>SPCC74.06 |mak3|phk2|histidine kinase Mak3|Schizosaccharomyces pombe|chr 3|||Manual	1	4	4	4	2	2	2	266.85	2344	2344	6.7361e-15	0.71842	0.82049	28.314	4	51302000	26607000	24695000				876	2776;2905;3454;3458	True;True;True;True	3026;3157;3762;3767	4554;4754;5613;5639;5640	6512;6786;6787;8044;8078;8079;8080;8081	6512;6787;8044;8080
SPCC757.09c	SPCC757.09c	2	2	2	>SPCC757.09c |rnc1||RNA-binding protein that suppresses calcineurin deletion Rnc1|Schizosaccharomyces pombe|chr 3|||Manual	1	2	2	2	5.5	5.5	5.5	43.377	398	398	6.6848e-16	0.82053	0.97099	14.98	2	93308000	50945000	42363000				877	706;1863	True;True	749;1992	1192;3002	1713;1714;4310	1714;4310
SPCC757.15	SPCC757.15	1	1	1	>SPCC757.15 |||sequence orphan|Schizosaccharomyces pombe|chr 3|||Manual	1	1	1	1	14.5	14.5	14.5	7.99	69	69	2.2883e-26	NaN	NaN	NaN	0	0	0	0				878	1636	TRUE	1750	2656;2657	3825;3826	3826
SPCC790.02	SPCC790.02	2	2	2	>SPCC790.02 |pep3|vps18|ubiquitin-protein ligase E3 |Schizosaccharomyces pombe|chr 3|||Manual	1	2	2	2	2.2	2.2	2.2	103.72	900	900	0.00011733	NaN	NaN	NaN	0	0	0	0				879	1799;3571	True;True	1927;3891	2916;5795	4180;8301	4180;8301
SPCC794.03	SPCC794.03	1	1	1	>SPCC794.03 |||amino acid permease |Schizosaccharomyces pombe|chr 3|||Manual	1	1	1	1	1.3	1.3	1.3	60.857	554	554	0.0072568	NaN	NaN	NaN	0	0	0	0				880	2699	TRUE	2943	4455	6378	6378
SPCC794.07	SPCC794.07	24	24	24	>SPCC794.07 |lat1||dihydrolipoamide S-acetyltransferase E2, Lat1 |Schizosaccharomyces pombe|chr 3|||Manual	1	24	24	24	54.2	54.2	54.2	52.06	483	483	0	2.5124	2.9272	32.446	140	77479000000	16777000000	60702000000				881	15;16;303;304;381;492;493;1265;1295;1305;1539;2025;2026;2327;2372;2373;2382;2405;2406;2548;2559;3379;3393;3770	True;True;True;True;True;True;True;True;True;True;True;True;True;True;True;True;True;True;True;True;True;True;True;True	15;16;318;319;320;321;400;519;520;521;1344;1376;1377;1388;1642;1643;2168;2169;2529;2530;2531;2584;2585;2594;2595;2623;2624;2625;2626;2627;2628;2779;2780;2791;2792;3681;3697;4108	34;35;476;477;478;479;480;481;482;483;484;485;486;585;764;765;766;767;768;769;770;771;772;773;774;775;776;777;778;779;780;781;782;783;784;785;786;787;788;789;790;791;792;793;794;795;796;797;798;799;800;801;802;803;804;805;806;807;808;809;810;811;812;813;814;815;816;817;818;819;820;821;822;823;824;2063;2064;2111;2112;2113;2114;2115;2116;2117;2118;2119;2120;2121;2122;2123;2124;2125;2126;2127;2128;2…	49;50;51;683;684;685;686;687;688;689;690;691;692;693;694;695;696;697;698;699;700;701;702;703;844;1115;1116;1117;1118;1119;1120;1121;1122;1123;1124;1125;1126;1127;1128;1129;1130;1131;1132;1133;1134;1135;1136;1137;1138;1139;1140;1141;1142;1143;1144;1145;1146;1147;1148;1149;1150;1151;1152;1153;1154;1155;1156;1157;1158;1159;1160;1161;1162;1163;1164;1165;1166;1167;1168;1169;1170;1171;1172;1173;1174;11…	49;51;688;701;844;1116;1148;2970;3052;3082;3600;4629;4630;5481;5602;5607;5631;5745;5767;6067;6087;7875;7916;8753	347;348;349;350;351;352;353;354;355	58;65;138;263;277;289;334;348;482
SPCC794.08	SPCC794.08	2	2	2	>SPCC794.08 |||HEAT repeat protein, involved in localization to plasma membrane |Schizosaccharomyces pombe|chr 3|||Manual	1	2	2	2	4	4	4	90.382	798	798	1.5636e-10	NaN	NaN	NaN	1	25880000	12959000	12921000				882	605;2362	True;True	641;2574	1045;3891	1507;5571	1507;5571
SPCC794.10	SPCC794.10	1	1	1	>SPCC794.10 |||UTP-glucose-1-phosphateuridylyltransferase-like|Schizosaccharomyces pombe|chr 3|||Manual	1	1	1	1	3.4	3.4	3.4	56.74	499	499	0.036793	NaN	NaN	NaN	1	19874000	8287300	11586000				883	1256	TRUE	1335	2051	2949	2949
SPCC794.12c	SPCC794.12c	1	1	1	>SPCC794.12c |mae2||malic enzyme, malate dehydrogenase |Schizosaccharomyces pombe|chr 3|||Manual	1	1	1	1	3	3	3	62.534	565	565	0.0041352	NaN	NaN	NaN	0	0	0	0				884	2833	TRUE	3083	4657	6649	6649
SPCC825.01	SPCC825.01	1	1	1	>SPCC825.01 |||ribosome biogenesis ATPase, Arb family ABCF1-like |Schizosaccharomyces pombe|chr 3|||Manual	1	1	1	1	1.5	1.5	1.5	92.689	822	822	0.00033233	NaN	NaN	NaN	1	3862300	2176300	1686000				885	3077	TRUE	3347	5015	7159	7159
SPCC895.07	SPCC895.07	2	2	2	>SPCC895.07 |alp14|mtc1|TOG ortholog Alp14|Schizosaccharomyces pombe|chr 3|||Manual	1	2	2	2	4.2	4.2	4.2	89.445	809	809	2.2175e-32	1.044	1.1968	18.538	3	100250000	42863000	57385000				886	1275;3439	True;True	1355;3744	2083;2084;5589	3003;3004;3005;3006;8008	3005;8008
SPCC895.09c	SPCC895.09c	2	2	2	>SPCC895.09c |ucp12||ATP-dependent RNA helicase Ucp12 |Schizosaccharomyces pombe|chr 3|||Manual	1	2	2	2	1.8	1.8	1.8	149.88	1327	1327	1.211e-11	0.94575	1.1177	0.53462	2	30748000	13677000	17072000				887	2758;3671	True;True	3007;4001	4535;5965	6489;8545	6489;8545
SPCC962.04	SPCC962.04	1	1	1	>SPCC962.04 |rps1201|rps12-1, rps12|40S ribosomal protein S12 |Schizosaccharomyces pombe|chr 3|||Manual	1	1	1	1	12.4	12.4	12.4	15.616	145	145	1.8747e-05	NaN	NaN	NaN	1	45255000	26113000	19142000				888	3501	TRUE	3816	5704	8174	8174
SPCC965.10	SPCC965.10	1	1	1	>SPCC965.10 |||transcription factor |Schizosaccharomyces pombe|chr 3|||Manual	1	1	1	1	2.7	2.7	2.7	59.8	525	525	0.033947	NaN	NaN	NaN	1	6374700	2669800	3704900				889	2535	TRUE	2764	4209	6030	6030
SPCC970.03	SPCC970.03	4	4	4	>SPCC970.03 |||cytochrome b5 reductase |Schizosaccharomyces pombe|chr 3|||Manual	1	4	4	4	21.3	21.3	21.3	33.723	301	301	3.3745e-36	1.1934	1.2331	35.015	4	176320000	85237000	91083000				890	327;806;1059;3046	True;True;True;True	344;852;1121;3313	521;1334;1737;1738;4966	753;1925;2497;2498;7087;7088	753;1925;2497;7088	356	171
SPCC970.06	SPCC970.06	1	1	1	>SPCC970.06 |||cargo receptor for soluble proteins |Schizosaccharomyces pombe|chr 3|||Manual	1	1	1	1	4.3	4.3	4.3	34.385	302	302	0.00018193	NaN	NaN	NaN	1	6140100	2395600	3744400				891	639	TRUE	677	1094	1569;1570	1570
SPCC970.10c	SPCC970.10c	1	1	1	>SPCC970.10c |brl2|rfp1|ubiquitin-protein ligase E3 Brl2|Schizosaccharomyces pombe|chr 3|||Manual	1	1	1	1	1.8	1.8	1.8	78.052	680	680	4.1546e-07	NaN	NaN	NaN	0	0	0	0				892	855	TRUE	904	1422	2040	2040
SPCP1E11.05c	SPCP1E11.05c	1	1	1	>SPCP1E11.05c |are2||acyl-coA-sterol acyltransferase Are2 |Schizosaccharomyces pombe|chr 3|||Manual	1	1	1	1	2.5	2.5	2.5	55.156	472	472	0.00031253	NaN	NaN	NaN	1	19490000	6483200	13007000				893	3321	TRUE	3619	5415	7727	7727
SPCP1E11.06	SPCP1E11.06	2	2	2	>SPCP1E11.06 |apl4||AP-1 adaptor complex gamma subunit Apl4|Schizosaccharomyces pombe|chr 3|||Manual	1	2	2	2	3.4	3.4	3.4	96.04	865	865	2.8106e-17	0.95955	1.0997	27.025	2	52613000	24834000	27779000				894	190;1320	True;True	201;1407	316;2166;2167;2168	444;3112;3113;3114;3115	444;3115
SPCP1E11.09c	SPCP1E11.09c	1	1	1	>SPCP1E11.09c |rpp103|rpp1-3|60S acidic ribosomal protein Rpp1-3|Schizosaccharomyces pombe|chr 3|||Manual	1	1	1	1	14.7	14.7	14.7	11.216	109	109	6.1606e-16	0.96111	1.0194	51.613	2	139610000	77238000	62374000				895	109	TRUE	113	207;208	295;296;297	297
SPCP1E11.11	SPCP1E11.11	5	5	5	>SPCP1E11.11 |puf6||Puf family RNA-binding protein Puf6 |Schizosaccharomyces pombe|chr 3|||Manual	1	5	5	5	9.3	9.3	9.3	72.634	642	642	2.8602e-24	0.6144	0.77009	26.994	2	93700000	58152000	35547000				896	295;1605;1892;2140;3150	True;True;True;True;True	310;1717;2021;2304;3428	465;466;2609;3038;3470;5130	669;670;3744;4356;4972;7315	670;3744;4356;4972;7315
SPCP31B10.08c	SPCP31B10.08c	5	5	5	>SPCP31B10.08c |rpl35a|rpl33|60S ribosomal protein L35a|Schizosaccharomyces pombe|chr 3|||Manual	1	5	5	5	38.9	38.9	38.9	12.108	108	108	1.4049e-26	0.65823	0.85947	10.531	6	313750000	169470000	144280000				897	815;1397;3097;3470;3536	True;True;True;True;True	863;1489;3371;3779;3853	1349;2273;2274;5045;5657;5658;5747	1945;3259;3260;3261;7198;7199;8106;8107;8108;8109;8234	1945;3260;7199;8107;8234
SPCPB16A4.03c	SPCPB16A4.03c	4	4	4	>SPCPB16A4.03c |ade10||IMPcyclohydrolase/phosphoribosylaminoimidazolecarboxamideformyltransferase|Schizosaccharomyces pombe|chr 3|||Manual	1	4	4	4	10.1	10.1	10.1	64.123	585	585	6.112e-27	0.96229	1.0194	7.5152	4	132020000	72599000	59420000				898	622;1177;1183;2653	True;True;True;True	660;1249;1255;2893	1071;1921;1922;1931;4382;4383;4384	1537;1538;2773;2774;2785;6275;6276;6277;6278	1538;2773;2785;6278

## Sheet: E130212_SILAC_summary
Protein IDs	Fasta headers	Peptide count	Ratio H/L count	Ratio H/L (NE/bonsai)	Ratio H/L (NE/bonsai), normalized	Intensity	Intensity H (NE)	Intensity L (bonsai)
SPAC1002.12c	>SPAC1002.12c |||succinate-semialdehyde dehydrogenase |Schizosaccharomyces pombe|chr 1|||Manual	1	0	NaN	NaN	0	0	0
SPAC1071.08	>SPAC1071.08 |rpp203|rpp2-3, rla6|60S acidic ribosomal protein P2C subunit|Schizosaccharomyces pombe|chr 1|||Manual	1	0	NaN	NaN	0	0	0
SPAC11D3.15	>SPAC11D3.15 |||5-oxoprolinase |Schizosaccharomyces pombe|chr 1|||Manual	1	0	NaN	NaN	0	0	0
SPAC13G6.06c	>SPAC13G6.06c |gcv2||glycine cleavage complex subunit P |Schizosaccharomyces pombe|chr 1|||Manual	1	0	NaN	NaN	0	0	0
SPAC140.01	>SPAC140.01 |sdh2||succinate dehydrogenase |Schizosaccharomyces pombe|chr 1|||Manual	1	0	NaN	NaN	0	0	0
SPAC16E8.07c	>SPAC16E8.07c |vph1||V-type ATPase V0 subunit a |Schizosaccharomyces pombe|chr 1|||Manual	1	0	NaN	NaN	0	0	0
SPAC17G6.09	>SPAC17G6.09 |sec62||ER protein translocation subcomplex subunit Sec62 |Schizosaccharomyces pombe|chr 1|||Manual	1	0	NaN	NaN	0	0	0
SPAC17G8.07	>SPAC17G8.07 |yaf9||YEATS family histone acetyltransferase subunit Yaf9|Schizosaccharomyces pombe|chr 1|||Manual	1	0	NaN	NaN	0	0	0
SPAC20G4.07c	>SPAC20G4.07c |sts1|erg4|C-24|Schizosaccharomyces pombe|chr 1|||Manual	1	0	NaN	NaN	0	0	0
SPAC23A1.11;SPBC839.13c	>SPAC23A1.11 |rpl1602|rpl16-2|60S ribosomal protein L13/L16 |Schizosaccharomyces pombe|chr 1|||Manual;>SPBC839.13c |rpl1601||60S ribosomal protein L13/L16 |Schizosaccharomyces pombe|chr 2|||Manual	2	0	NaN	NaN	0	0	0
SPAC25B8.11	>SPAC25B8.11 |||transcription factor |Schizosaccharomyces pombe|chr 1|||Manual	1	0	NaN	NaN	0	0	0
SPAC27D7.07c	>SPAC27D7.07c |smd1||Sm snRNP core protein Smd1|Schizosaccharomyces pombe|chr 1|||Manual	1	0	NaN	NaN	0	0	0
SPAC27E2.10c	>SPAC27E2.10c |rfc3|SPAPJ698.01c|DNA replication factor C complex subunit Rfc3|Schizosaccharomyces pombe|chr 1|||Manual	1	0	NaN	NaN	0	0	0
SPAC27F1.09c	>SPAC27F1.09c |prp10|sap155|U2 snRNP-associated protein Sap155|Schizosaccharomyces pombe|chr 1|||Manual	1	0	NaN	NaN	0	0	0
SPAC2F3.03c	>SPAC2F3.03c |rpa49|rpa51|DNA-directed RNA polymerase I complex subunit Rpa49 |Schizosaccharomyces pombe|chr 1|||Manual	1	0	NaN	NaN	0	0	0
SPAC2F7.11	>SPAC2F7.11 |nrd1|msa2|RNA-binding protein Nrd1|Schizosaccharomyces pombe|chr 1|||Manual	1	0	NaN	NaN	0	0	0
SPAC31A2.05c	>SPAC31A2.05c |mis4||adherin, cohesin loading factor Mis4|Schizosaccharomyces pombe|chr 1|||Manual	1	0	NaN	NaN	0	0	0
SPAC31G5.05c	>SPAC31G5.05c |||ribulose phosphate 3-epimerase |Schizosaccharomyces pombe|chr 1|||Manual	1	0	NaN	NaN	0	0	0
SPAC323.04	>SPAC323.04 |||mitochondrial ATPase |Schizosaccharomyces pombe|chr 1|||Manual	1	0	NaN	NaN	0	0	0
SPAC32A11.04c	>SPAC32A11.04c |tif212|tif22, SPAC6B12.17c|translation initiation factor eIF2 beta subunit |Schizosaccharomyces pombe|chr 1|||Manual	1	0	NaN	NaN	0	0	0
SPAC343.16	>SPAC343.16 |lys2||homoaconitate hydratase Lys2|Schizosaccharomyces pombe|chr 1|||Manual	1	0	NaN	NaN	0	0	0
SPAC3A12.07	>SPAC3A12.07 |rpb11||RNA polymerase II complex subunit Rpb11|Schizosaccharomyces pombe|chr 1|||Manual	1	0	NaN	NaN	0	0	0
SPAC3H1.02c	>SPAC3H1.02c |||metallopeptidase |Schizosaccharomyces pombe|chr 1|||Manual	1	0	NaN	NaN	26632000	0	26632000
SPAC4A8.07c	>SPAC4A8.07c |||sphingoid long chain base kinase |Schizosaccharomyces pombe|chr 1|||Manual	1	0	NaN	NaN	0	0	0
SPAC4D7.09	>SPAC4D7.09 |tif223||translation initiation factor eIF2B gamma subunit |Schizosaccharomyces pombe|chr 1|||Manual	1	0	NaN	NaN	0	0	0
SPAC4F8.11	>SPAC4F8.11 |||WD repeat protein, human WDR24 family|Schizosaccharomyces pombe|chr 1|||Manual	1	0	NaN	NaN	0	0	0
SPAC4G9.20c	>SPAC4G9.20c |||mitochondrial carrier with solute carrier repeats |Schizosaccharomyces pombe|chr 1|||Manual	1	0	NaN	NaN	0	0	0
SPAC57A7.04c	>SPAC57A7.04c |pabp||mRNA export shuttling protein|Schizosaccharomyces pombe|chr 1|||Manual	1	0	NaN	NaN	0	0	0
SPAC589.12	>SPAC589.12 ||SPAC688.01|glycosylceramide biosynthesis protein |Schizosaccharomyces pombe|chr 1|||Manual	1	0	NaN	NaN	0	0	0
SPAC644.11c	>SPAC644.11c |pkp1||mitochondrial pyruvate dehydrogenase |Schizosaccharomyces pombe|chr 1|||Manual	1	0	NaN	NaN	0	0	0
SPAC6C3.04	>SPAC6C3.04 |cit1||citrate synthase Cit1|Schizosaccharomyces pombe|chr 1|||Manual	1	0	NaN	NaN	0	0	0
SPAC6F6.11c	>SPAC6F6.11c |||pyridoxine-pyridoxal-pyridoxamine kinase |Schizosaccharomyces pombe|chr 1|||Manual	1	0	NaN	NaN	0	0	0
SPAC6G10.03c	>SPAC6G10.03c |||mitochondrial cardiolipin-specific phospholipase |Schizosaccharomyces pombe|chr 1|||Manual	1	0	NaN	NaN	0	0	0
SPAC8C9.12c	>SPAC8C9.12c |||mitochondrial iron ion transporter |Schizosaccharomyces pombe|chr 1|||Manual	1	0	NaN	NaN	0	0	0
SPACUNK4.10	>SPACUNK4.10 |||glyoxylate reductase |Schizosaccharomyces pombe|chr 1|||Manual	1	0	NaN	NaN	0	0	0
SPAP27G11.10c	>SPAP27G11.10c |nup184||nucleoporin Nup184|Schizosaccharomyces pombe|chr 1|||Manual	1	0	NaN	NaN	0	0	0
SPAPYUG7.03c	>SPAPYUG7.03c |mid2||medial ring protein Mid2|Schizosaccharomyces pombe|chr 1|||Manual	1	0	NaN	NaN	0	0	0
SPBC106.16	>SPBC106.16 |pre6||20S proteasome component alpha 4 Pre6|Schizosaccharomyces pombe|chr 2|||Manual	1	0	NaN	NaN	0	0	0
SPBC1105.07c	>SPBC1105.07c |||nuclear pore associated protein Thp1-Sac3 complex subunit |Schizosaccharomyces pombe|chr 2|||Manual	1	0	NaN	NaN	0	0	0
SPBC11B10.10c	>SPBC11B10.10c |pht1||histone H2A variant H2A.Z, Pht1|Schizosaccharomyces pombe|chr 2|||Manual	1	0	NaN	NaN	48042000	0	48042000
SPBC1347.06c	>SPBC1347.06c |cki1||serine/threonine protein kinase Cki1|Schizosaccharomyces pombe|chr 2|||Manual	1	0	NaN	NaN	0	0	0
SPBC146.13c	>SPBC146.13c |myo1||myosin type I|Schizosaccharomyces pombe|chr 2|||Manual	1	0	NaN	NaN	0	0	0
SPBC1683.04	>SPBC1683.04 |||glycosyl hydrolase family 3 |Schizosaccharomyces pombe|chr 2|||Manual	1	0	NaN	NaN	0	0	0
SPBC16C6.09	>SPBC16C6.09 |ogm4|oma4|protein O-mannosyltransferase Ogm4|Schizosaccharomyces pombe|chr 2|||Manual	1	0	NaN	NaN	0	0	0
SPBC16C6.12c	>SPBC16C6.12c |||Las1-like protein|Schizosaccharomyces pombe|chr 2|||Manual	1	0	NaN	NaN	0	0	0
SPBC1734.03	>SPBC1734.03 ||SPBC337.19|dihydropteroatesynthase/2-amino-4-hydroxy-6-hydroxymethyldihydropteridinediphosphokinase/dihydroneopterin aldolase |Schizosaccharomyces pombe|chr 2|||Manual	1	0	NaN	NaN	0	0	0
SPBC1734.12c	>SPBC1734.12c |alg12||dolichyl pyrophosphate Man7GlcNAc2 alpha-1,6-mannosyltransferase Alg12 |Schizosaccharomyces pombe|chr 2|||Manual	1	0	NaN	NaN	0	0	0
SPBC1734.13	>SPBC1734.13 |atp3||F1-ATPase gamma subunit |Schizosaccharomyces pombe|chr 2|||Manual	1	0	NaN	NaN	0	0	0
SPBC1778.10c	>SPBC1778.10c |ppk21|SPBC4C3.11|serine/threonine protein kinase Ppk21|Schizosaccharomyces pombe|chr 2|||Manual	1	0	NaN	NaN	0	0	0
SPBC17G9.03c	>SPBC17G9.03c |krs1||cytoplasmic lysine-tRNA ligase Krs1 |Schizosaccharomyces pombe|chr 2|||Manual	1	0	NaN	NaN	0	0	0
SPBC19F5.05c	>SPBC19F5.05c |ppp1|SPBC25D12.01c|pescadillo-family BRCT domain protein |Schizosaccharomyces pombe|chr 2|||Manual	1	0	NaN	NaN	0	0	0
SPBC19G7.01c	>SPBC19G7.01c |msh2|swi8, mut3, SPBC24C6.12c|MutS protein homolog 2|Schizosaccharomyces pombe|chr 2|||Manual	1	0	NaN	NaN	0	0	0
SPBC25H2.14	>SPBC25H2.14 |mug16||UNC-50 family protein|Schizosaccharomyces pombe|chr 2|||Manual	1	0	NaN	NaN	0	0	0
SPBC26H8.04c	>SPBC26H8.04c |||DEP domain protein|Schizosaccharomyces pombe|chr 2|||Manual	1	0	NaN	NaN	0	0	0
SPBC27B12.08	>SPBC27B12.08 |sip1||Pof6 interacting protein Sip1, predicted AP-1 accessory protein|Schizosaccharomyces pombe|chr 2|||Manual	1	0	NaN	NaN	0	0	0
SPBC29A10.04	>SPBC29A10.04 |psm1|smc1|mitotic cohesin complex subunit Psm1|Schizosaccharomyces pombe|chr 2|||Manual	1	0	NaN	NaN	0	0	0
SPBC29A3.01	>SPBC29A3.01 |ccc2||copper transporting ATPase Ccc2 |Schizosaccharomyces pombe|chr 2|||Manual	1	0	NaN	NaN	0	0	0
SPBC29A3.02c	>SPBC29A3.02c |his7||phosphoribosyl-AMP cyclohydrolase/phosphoribosyl-ATP pyrophosphohydrolase His7|Schizosaccharomyces pombe|chr 2|||Manual	1	0	NaN	NaN	0	0	0
SPBC2F12.03c	>SPBC2F12.03c |||EST1 family protein |Schizosaccharomyces pombe|chr 2|||Manual	1	0	NaN	NaN	0	0	0
SPBC2G2.04c	>SPBC2G2.04c |mmf1|pmf1|YjgF family protein Mmf1|Schizosaccharomyces pombe|chr 2|||Manual	1	0	NaN	NaN	0	0	0
SPBC31F10.14c	>SPBC31F10.14c |hip3|hir3|HIRA interacting protein Hip3|Schizosaccharomyces pombe|chr 2|||Manual	1	0	NaN	NaN	0	0	0
SPBC359.05	>SPBC359.05 |abc3||ABC transporter Abc3, unknown specificity|Schizosaccharomyces pombe|chr 2|||Manual	1	0	NaN	NaN	0	0	0
SPBC3D6.02	>SPBC3D6.02 |but2||But2 family protein But2|Schizosaccharomyces pombe|chr 2|||Manual	1	0	NaN	NaN	0	0	0
SPBC3D6.05	>SPBC3D6.05 |ptp4||phosphatidate cytidylyltransferase Ptp4 |Schizosaccharomyces pombe|chr 2|||Manual	1	0	NaN	NaN	0	0	0
SPBC543.04	>SPBC543.04 |||Npr2/3 complex subunit Npr3 |Schizosaccharomyces pombe|chr 2|||Manual	1	0	NaN	NaN	0	0	0
SPBC582.06c	>SPBC582.06c |mcp6|hrs1, mug3|horsetail movement protein Hrs1/Mcp6|Schizosaccharomyces pombe|chr 2|||Manual	1	0	NaN	NaN	0	0	0
SPBC646.09c	>SPBC646.09c |int6|yin6|eIF3e subunit Int6|Schizosaccharomyces pombe|chr 2|||Manual	1	0	NaN	NaN	0	0	0
SPBC646.12c	>SPBC646.12c |gap1|src1, sar1|GTPase activating protein Gap1|Schizosaccharomyces pombe|chr 2|||Manual	1	0	NaN	NaN	0	0	0
SPBC660.11	>SPBC660.11 |tcg1|mug187|single-stranded telomeric binding protein Tgc1|Schizosaccharomyces pombe|chr 2|||Manual	1	0	NaN	NaN	0	0	0
SPBC691.04	>SPBC691.04 |||mitochondrial ATP-dependent RNA helicase Mss116 |Schizosaccharomyces pombe|chr 2|||Manual	1	0	NaN	NaN	0	0	0
SPBC6B1.08c	>SPBC6B1.08c |ofd1||2-oxoglutarate and Fe|Schizosaccharomyces pombe|chr 2|||Manual	1	0	NaN	NaN	0	0	0
SPBC839.07	>SPBC839.07 |ibp1||Cdc25 family phosphatase Ibp1|Schizosaccharomyces pombe|chr 2|||Manual	1	0	NaN	NaN	0	0	0
SPBC839.08c	>SPBC839.08c |its8||pig-N |Schizosaccharomyces pombe|chr 2|||Manual	1	0	NaN	NaN	0	0	0
SPBC947.02	>SPBC947.02 |apl2||AP-1 adaptor complex subunit beta subunit Apl2|Schizosaccharomyces pombe|chr 2|||Manual	1	0	NaN	NaN	0	0	0
SPBP4H10.08	>SPBP4H10.08 |qcr10||Reiske ISP-associated protein, ubiquinol-cytochrome-c reductase complex subunit Qcr10 |Schizosaccharomyces pombe|chr 2|||Manual	1	0	NaN	NaN	0	0	0
SPBP8B7.06	>SPBP8B7.06 |rpp201|rpp2, rpp2-1|60S acidic ribosomal protein P2A subunit |Schizosaccharomyces pombe|chr 2|||Manual	1	0	NaN	NaN	0	0	0
SPBPB21E7.07	>SPBPB21E7.07 |aes1|SPAPB21E7.07|enhancer of RNA-mediated gene silencing|Schizosaccharomyces pombe|chr 2|||Manual	1	0	NaN	NaN	0	0	0
SPBPJ4664.06	>SPBPJ4664.06 |gpt1||UDP-glucose-glycoprotein glucosyltransferase Gpt1|Schizosaccharomyces pombe|chr 2|||Manual	1	0	NaN	NaN	0	0	0
SPCC1442.06	>SPCC1442.06 |pre8||20S proteasome component alpha 2, Pre8 |Schizosaccharomyces pombe|chr 3|||Manual	1	0	NaN	NaN	0	0	0
SPCC14G10.02	>SPCC14G10.02 ||SPCC18B5.13|ribosome biogenesis protein Urb1 |Schizosaccharomyces pombe|chr 3|||Manual	1	0	NaN	NaN	0	0	0
SPCC1620.11	>SPCC1620.11 |nup97|mug87|nucleoporin Nic96 homolog|Schizosaccharomyces pombe|chr 3|||Manual	1	0	NaN	NaN	0	0	0
SPCC1682.10	>SPCC1682.10 |rpn8||19S proteasome regulatory subunit Rpn8 |Schizosaccharomyces pombe|chr 3|||Manual	1	0	NaN	NaN	0	0	0
SPCC16A11.16c	>SPCC16A11.16c |rpn1302|rpn13, rpn13b|19S proteasome regulatory subunit Rpn13b|Schizosaccharomyces pombe|chr 3|||Manual	1	0	NaN	NaN	0	0	0
SPCC188.02	>SPCC188.02 |par1||protein phosphatase regulatory subunit Par1|Schizosaccharomyces pombe|chr 3|||Manual	1	0	NaN	NaN	0	0	0
SPCC23B6.01c	>SPCC23B6.01c |||oxysterol binding protein |Schizosaccharomyces pombe|chr 3|||Manual	2	0	NaN	NaN	0	0	0
SPCC290.03c	>SPCC290.03c |nup186||nucleoporin Nup186|Schizosaccharomyces pombe|chr 3|||Manual	1	0	NaN	NaN	0	0	0
SPCC338.13	>SPCC338.13 |cog4||Golgi transport complex subunit Cog4 |Schizosaccharomyces pombe|chr 3|||Manual	1	0	NaN	NaN	0	0	0
SPCC576.07	>SPCC576.07 |ret3||coatomer zeta subunit |Schizosaccharomyces pombe|chr 3|||Manual	1	0	NaN	NaN	0	0	0
SPCC622.11	>SPCC622.11 |||LMBR1-like membrane protein|Schizosaccharomyces pombe|chr 3|||Manual	1	0	NaN	NaN	0	0	0
SPCC757.15	>SPCC757.15 |||sequence orphan|Schizosaccharomyces pombe|chr 3|||Manual	1	0	NaN	NaN	0	0	0
SPCC790.02	>SPCC790.02 |pep3|vps18|ubiquitin-protein ligase E3 |Schizosaccharomyces pombe|chr 3|||Manual	2	0	NaN	NaN	0	0	0
SPCC794.03	>SPCC794.03 |||amino acid permease |Schizosaccharomyces pombe|chr 3|||Manual	1	0	NaN	NaN	0	0	0
SPCC794.12c	>SPCC794.12c |mae2||malic enzyme, malate dehydrogenase |Schizosaccharomyces pombe|chr 3|||Manual	1	0	NaN	NaN	0	0	0
SPCC970.10c	>SPCC970.10c |brl2|rfp1|ubiquitin-protein ligase E3 Brl2|Schizosaccharomyces pombe|chr 3|||Manual	1	0	NaN	NaN	0	0	0
SPAC18B11.08c	>SPAC18B11.08c |||conserved fungal protein|Schizosaccharomyces pombe|chr 1|||Manual	2	1	NaN	NaN	199030000	90144000	108880000
SPAC1687.01	>SPAC1687.01 |rpc19|rpa17, SPAPYUL23.01|DNA-directed RNA polymerase I and III subunit Rpc19|Schizosaccharomyces pombe|chr 1|||Manual	1	1	NaN	NaN	142740000	77609000	65127000
SPBC3B9.13c;SPAC644.15	>SPBC3B9.13c |rpp102|rpp1-2|60S acidic ribosomal protein Rpp1-2|Schizosaccharomyces pombe|chr 2|||Manual;>SPAC644.15 |rpp101|rpp1-1|60S acidic ribosomal protein Rpp1-1|Schizosaccharomyces pombe|chr 1|||Manual	1	1	NaN	NaN	131270000	68048000	63219000
SPAC1B1.01	>SPAC1B1.01 |deb1|rdp1|transcription factor Deb1/Rdp1|Schizosaccharomyces pombe|chr 1|||Manual	1	1	NaN	NaN	95154000	65618000	29536000
SPCC553.06	>SPCC553.06 |swp1||oligosaccharyltransferase delta subunit Swp1 |Schizosaccharomyces pombe|chr 3|||Manual	2	1	NaN	NaN	115360000	63536000	51822000
SPAC17H9.05	>SPAC17H9.05 |ebp2||rRNA processing protein Ebp2 |Schizosaccharomyces pombe|chr 1|||Manual	1	1	NaN	NaN	81407000	62422000	18985000
SPBC11G11.05	>SPBC11G11.05 |rpa34||DNA-directed RNA polymerase I complex subunit Rpa34 |Schizosaccharomyces pombe|chr 2|||Manual	1	1	NaN	NaN	103160000	61227000	41929000
SPBP23A10.08	>SPBP23A10.08 |alp5|arp4|actin-like protein Arp4|Schizosaccharomyces pombe|chr 2|||Manual	1	1	NaN	NaN	74840000	60482000	14357000
SPBC776.11	>SPBC776.11 |rpl2801|rpl28-1|60S ribosomal protein L27/L28|Schizosaccharomyces pombe|chr 2|||Manual	3	1	NaN	NaN	113910000	54827000	59078000
SPBC3H7.15	>SPBC3H7.15 |hhp1||serine/threonine protein kinase Hhp1|Schizosaccharomyces pombe|chr 2|||Manual	2	1	NaN	NaN	79633000	49383000	30251000
SPAC19A8.04	>SPAC19A8.04 |erg5||C-22 sterol desaturase Erg5|Schizosaccharomyces pombe|chr 1|||Manual	2	1	NaN	NaN	99857000	49101000	50755000
SPAC13G7.02c	>SPAC13G7.02c |ssa1||heat shock protein Ssa1 |Schizosaccharomyces pombe|chr 1|||Manual	14	1	NaN	NaN	106130000	47615000	58515000
SPBC28F2.11	>SPBC28F2.11 |||HMG box protein|Schizosaccharomyces pombe|chr 2|||Manual	1	1	NaN	NaN	60849000	46769000	14080000
SPBP8B7.05c	>SPBP8B7.05c |||carbonic anhydrase |Schizosaccharomyces pombe|chr 2|||Manual	1	1	NaN	NaN	86038000	46150000	39888000
SPAC9E9.10c	>SPAC9E9.10c |cbh1|cbh|CENP-B homolog Cbh1|Schizosaccharomyces pombe|chr 1|||Manual	1	1	NaN	NaN	70120000	45144000	24977000
SPAC18B11.03c	>SPAC18B11.03c |||N-acetyltransferase |Schizosaccharomyces pombe|chr 1|||Manual	1	1	NaN	NaN	66484000	44864000	21619000
SPCC1442.10c	>SPCC1442.10c |rpb3||RNA polymerase II subunit 3|Schizosaccharomyces pombe|chr 3|||Manual	1	1	NaN	NaN	88313000	43935000	44379000
SPCC18B5.03	>SPCC18B5.03 |wee1||M phase inhibitor protein kinase Wee1|Schizosaccharomyces pombe|chr 3|||Manual	1	1	NaN	NaN	93839000	42034000	51806000
SPAC11G7.03	>SPAC11G7.03 |idh1|glu3|isocitrate dehydrogenase |Schizosaccharomyces pombe|chr 1|||Manual	1	1	NaN	NaN	85301000	41718000	43582000
SPBC365.15	>SPBC365.15 |alp4||gamma tubulin complex Spc97/GCP2 subunit Alp4|Schizosaccharomyces pombe|chr 2|||Manual	1	1	NaN	NaN	99170000	40792000	58378000
SPBC428.11	>SPBC428.11 ||met17|homocysteine synthase Met17|Schizosaccharomyces pombe|chr 2|||Manual	1	1	NaN	NaN	63076000	39944000	23132000
SPAC1486.04c	>SPAC1486.04c |alm1||medial ring protein Alm1|Schizosaccharomyces pombe|chr 1|||Manual	1	1	NaN	NaN	67708000	39517000	28191000
SPBC646.16	>SPBC646.16 |||20S proteasome component alpha 1 |Schizosaccharomyces pombe|chr 2|||Manual	1	1	NaN	NaN	62809000	38346000	24463000
SPAC6F12.10c	>SPAC6F12.10c |ade3|min11|phosphoribosylformylglycinamidine synthase Ade3 |Schizosaccharomyces pombe|chr 1|||Manual	1	1	NaN	NaN	66023000	38225000	27799000
SPAC19A8.15	>SPAC19A8.15 |trp2||tryptophan synthase |Schizosaccharomyces pombe|chr 1|||Manual	2	1	NaN	NaN	83620000	37101000	46519000
SPCC584.04	>SPCC584.04 |sup35|erf3|translation release factor class II eRF3|Schizosaccharomyces pombe|chr 3|||Manual	1	1	NaN	NaN	62380000	34983000	27397000
SPAC23H4.06	>SPAC23H4.06 |gln1||glutamate-ammonia ligase Gln1|Schizosaccharomyces pombe|chr 1|||Manual	1	1	NaN	NaN	60478000	34769000	25709000
SPAC23E2.01	>SPAC23E2.01 |fep1|gaf2|iron-sensing transcription factor Fep1|Schizosaccharomyces pombe|chr 1|||Manual	1	1	NaN	NaN	47523000	34641000	12882000
SPBC25H2.05	>SPBC25H2.05 |egd2|nac1|nascent polypeptide-associated complex alpha subunit Egd2|Schizosaccharomyces pombe|chr 2|||Manual	1	1	NaN	NaN	54881000	34037000	20843000
SPAC458.02c	>SPAC458.02c |||mRNP complex |Schizosaccharomyces pombe|chr 1|||Manual	1	1	NaN	NaN	51654000	32116000	19538000
SPAC23D3.04c	>SPAC23D3.04c |gpd2||glycerol-3-phosphate dehydrogenase Gpd2|Schizosaccharomyces pombe|chr 1|||Manual	1	1	NaN	NaN	49970000	31117000	18853000
SPAC23H3.09c	>SPAC23H3.09c |gly1||threonine aldolase Gly1 |Schizosaccharomyces pombe|chr 1|||Manual	1	1	NaN	NaN	64825000	30813000	34012000
SPAC1A6.04c	>SPAC1A6.04c |plb1||phospholipase B homolog Plb1|Schizosaccharomyces pombe|chr 1|||Manual	1	1	NaN	NaN	47879000	30450000	17429000
SPAC1093.05	>SPAC1093.05 |||ATP-dependent RNA helicase Hca4 |Schizosaccharomyces pombe|chr 1|||Manual	2	1	NaN	NaN	39026000	29713000	9313200
SPAC9E9.07c	>SPAC9E9.07c |ypt2||GTPase Ypt2|Schizosaccharomyces pombe|chr 1|||Manual	1	1	NaN	NaN	59303000	28328000	30975000
SPBC8D2.18c	>SPBC8D2.18c |||adenosylhomocysteinase |Schizosaccharomyces pombe|chr 2|||Manual	1	1	NaN	NaN	49094000	28101000	20993000
SPCC1840.09	>SPCC1840.09 |||NAD dependent epimerase/dehydratase family protein|Schizosaccharomyces pombe|chr 3|||Manual	1	1	NaN	NaN	54099000	28097000	26002000
SPBC36.03c	>SPBC36.03c |||spermidine family transporter |Schizosaccharomyces pombe|chr 2|||Manual	1	1	NaN	NaN	48181000	27755000	20426000
SPAC1805.05	>SPAC1805.05 |cki3||serine/threonine protein kinase Cki3|Schizosaccharomyces pombe|chr 1|||Manual	2	1	NaN	NaN	47480000	27672000	19808000
SPAC2C4.16c;SPAC521.05	>SPAC2C4.16c |rps801|rps8-1, rps8|40S ribosomal protein S8 |Schizosaccharomyces pombe|chr 1|||Manual;>SPAC521.05 |rps802|rps8-2|40S ribosomal protein S8 |Schizosaccharomyces pombe|chr 1|||Manual	1	1	NaN	NaN	60256000	27475000	32781000
SPBC428.14	>SPBC428.14 |||1-acylglycerol-3-phosphate acyltransferase |Schizosaccharomyces pombe|chr 2|||Manual	1	1	NaN	NaN	38824000	27468000	11356000
SPBC17D11.04c	>SPBC17D11.04c |nto1||histone acetyltransferase complex subunit Nto1 |Schizosaccharomyces pombe|chr 2|||Manual	1	1	NaN	NaN	44057000	27336000	16722000
SPBC19F5.04	>SPBC19F5.04 |||aspartate kinase |Schizosaccharomyces pombe|chr 2|||Manual	1	1	NaN	NaN	50694000	27145000	23550000
SPBC3B8.03	>SPBC3B8.03 |||saccharopine dehydrogenase |Schizosaccharomyces pombe|chr 2|||Manual	1	1	NaN	NaN	57090000	27133000	29958000
SPBC776.17	>SPBC776.17 |||rRNA processing protein Rrp7 |Schizosaccharomyces pombe|chr 2|||Manual	1	1	NaN	NaN	59981000	27041000	32940000
SPBC18E5.11c	>SPBC18E5.11c |edc3|SPBC23G7.01c|enhancer of mRNA decapping Edc3 |Schizosaccharomyces pombe|chr 2|||Manual	1	1	NaN	NaN	52032000	26854000	25178000
SPAC17A5.13	>SPAC17A5.13 |||GTP cyclohydrolase |Schizosaccharomyces pombe|chr 1|||Manual	1	1	NaN	NaN	49426000	25766000	23660000
SPBC106.04	>SPBC106.04 |ada1||adenosine deaminase Ada1 |Schizosaccharomyces pombe|chr 2|||Manual	1	1	NaN	NaN	38732000	25675000	13057000
SPCC31H12.07	>SPCC31H12.07 |sec231|sec23a, SPCC5E4.01|COPII cargo receptor subunit Sec23a |Schizosaccharomyces pombe|chr 3|||Manual	1	1	NaN	NaN	54423000	24908000	29516000
SPCC1442.12	>SPCC1442.12 |pps1||phosphatidylserine synthase Pps1|Schizosaccharomyces pombe|chr 3|||Manual	1	1	NaN	NaN	43006000	24245000	18762000
SPBC17G9.07	>SPBC17G9.07 |rps2402|rps24-2|40S ribosomal protein S24 |Schizosaccharomyces pombe|chr 2|||Manual	1	1	NaN	NaN	56593000	23753000	32840000
SPCC1672.12c	>SPCC1672.12c |get4||ER membrane insertion protein Get4 |Schizosaccharomyces pombe|chr 3|||Manual	1	1	NaN	NaN	53384000	23713000	29671000
SPBC8E4.03	>SPBC8E4.03 |||agmatinase 2 |Schizosaccharomyces pombe|chr 2|||Manual	1	1	NaN	NaN	41654000	23465000	18189000
SPCC1020.06c	>SPCC1020.06c |tal1||transaldolase |Schizosaccharomyces pombe|chr 3|||Manual	2	1	NaN	NaN	43752000	23439000	20313000
SPAC139.02c	>SPAC139.02c |oac1||mitochondrial anion transporter |Schizosaccharomyces pombe|chr 1|||Manual	1	1	NaN	NaN	44885000	23006000	21879000
SPAC6F12.13c	>SPAC6F12.13c |fps1||geranyltranstransferase Fps1|Schizosaccharomyces pombe|chr 1|||Manual	1	1	NaN	NaN	42942000	22711000	20231000
SPBC1A4.03c	>SPBC1A4.03c |top2|ptr11|DNA topoisomerase II|Schizosaccharomyces pombe|chr 2|||Manual	2	1	NaN	NaN	41476000	22010000	19466000
SPAC30C2.04	>SPAC30C2.04 |||cofactor for methionyl-and glutamyl-tRNA synthetases |Schizosaccharomyces pombe|chr 1|||Manual	2	1	NaN	NaN	33007000	21910000	11097000
SPAC823.12	>SPAC823.12 |vps11||HOPs complex subunit Pep5/Vps11 |Schizosaccharomyces pombe|chr 1|||Manual	1	1	NaN	NaN	49136000	21750000	27385000
SPCC188.06c	>SPCC188.06c |srp54||signal recognition particle subunit Srp54|Schizosaccharomyces pombe|chr 3|||Manual	1	1	NaN	NaN	43145000	21487000	21658000
SPAC23A1.14c	>SPAC23A1.14c |||uncharacterised trans-sulfuration enzyme |Schizosaccharomyces pombe|chr 1|||Manual	2	1	NaN	NaN	49758000	21283000	28475000
SPAC27D7.14c	>SPAC27D7.14c |tpr1|SPAC637.02c|RNA polymerase II associated Paf1 complex subunit Tpr1|Schizosaccharomyces pombe|chr 1|||Manual	1	1	NaN	NaN	38248000	21283000	16965000
SPAC23G3.04	>SPAC23G3.04 |ies4||Ino80 complex subunit Ies4|Schizosaccharomyces pombe|chr 1|||Manual	1	1	NaN	NaN	27961000	21097000	6864500
SPBC11G11.03	>SPBC11G11.03 |mrt4||mRNA turnover and ribosome assembly protein Mrt4 |Schizosaccharomyces pombe|chr 2|||Manual	1	1	NaN	NaN	48165000	20685000	27481000
SPBC19F5.02c	>SPBC19F5.02c |utp4||U3 snoRNP protein Utp4 |Schizosaccharomyces pombe|chr 2|||Manual	1	1	NaN	NaN	36427000	20639000	15789000
SPAC6G10.09	>SPAC6G10.09 |||alpha glucosidase I Gls1 |Schizosaccharomyces pombe|chr 1|||Manual	2	1	NaN	NaN	33837000	20635000	13202000
SPAC821.11	>SPAC821.11 |pro1||gamma-glutamyl phosphate reductase Pro1 |Schizosaccharomyces pombe|chr 1|||Manual	1	1	NaN	NaN	45733000	20525000	25208000
SPBP4H10.06c	>SPBP4H10.06c |cut14|smc2|condensin complex subunit Cut14|Schizosaccharomyces pombe|chr 2|||Manual	1	1	NaN	NaN	38303000	20464000	17840000
SPAC1952.16	>SPAC1952.16 |rga9||RhoGAP, GTPase activator towards Rho/Rac/Cdc42-like small GTPases |Schizosaccharomyces pombe|chr 1|||Manual	1	1	NaN	NaN	44351000	20363000	23988000
SPBC14F5.12c	>SPBC14F5.12c |cbh2||CENP-B homolog Cbh2|Schizosaccharomyces pombe|chr 2|||Manual	1	1	NaN	NaN	25060000	19576000	5484100
SPCC330.09	>SPCC330.09 |||rRNA processing protein Enp2 |Schizosaccharomyces pombe|chr 3|||Manual	1	1	NaN	NaN	33704000	19497000	14207000
SPAC24H6.04	>SPAC24H6.04 |hxk1||hexokinase 1|Schizosaccharomyces pombe|chr 1|||Manual	1	1	NaN	NaN	40425000	19246000	21178000
SPCC962.04	>SPCC962.04 |rps1201|rps12-1, rps12|40S ribosomal protein S12 |Schizosaccharomyces pombe|chr 3|||Manual	1	1	NaN	NaN	45255000	19142000	26113000
SPBC4F6.04	>SPBC4F6.04 |rpl2502|rpl25b, rpl23a-2|60S ribosomal protein L25 |Schizosaccharomyces pombe|chr 2|||Manual	4	1	NaN	NaN	39026000	19135000	19891000
SPCC132.04c	>SPCC132.04c |gdh2||NAD-dependent glutamate dehydrogenase Gdh2 |Schizosaccharomyces pombe|chr 3|||Manual	1	1	NaN	NaN	25327000	18780000	6546700
SPBC14C8.12	>SPBC14C8.12 |rpb8||DNA-directed RNA polymerase I, II and III subunit Rpb8|Schizosaccharomyces pombe|chr 2|||Manual	1	1	NaN	NaN	38893000	18776000	20117000
SPAC13A11.04c	>SPAC13A11.04c |ubp8||SAGA complex ubiquitin C-terminal hydrolase Ubp8|Schizosaccharomyces pombe|chr 1|||Manual	1	1	NaN	NaN	25499000	18477000	7021800
SPBC16G5.05c	>SPBC16G5.05c |||VAP family protein |Schizosaccharomyces pombe|chr 2|||Manual	1	1	NaN	NaN	37502000	18256000	19246000
SPBC4C3.07	>SPBC4C3.07 |||translation initiation factor eIF3f|Schizosaccharomyces pombe|chr 2|||Manual	1	1	NaN	NaN	35298000	18200000	17098000
SPAC23C11.14	>SPAC23C11.14 |zhf1|zhf|zinc ion transporter Zhf1|Schizosaccharomyces pombe|chr 1|||Manual	1	1	NaN	NaN	42093000	17508000	24585000
SPCC4G3.15c	>SPCC4G3.15c |not2||CCR4-Not complex subunit Not2 |Schizosaccharomyces pombe|chr 3|||Manual	1	1	NaN	NaN	37499000	17418000	20080000
SPCC1682.12c	>SPCC1682.12c |ubp16||ubiquitin C-terminal hydrolase Ubp16|Schizosaccharomyces pombe|chr 3|||Manual	1	1	NaN	NaN	42710000	17233000	25477000
SPAC977.12;SPBPB8B6.05c	>SPAC977.12 |||L-asparaginase |Schizosaccharomyces pombe|chr 1|||Manual;>SPBPB8B6.05c |||L-asparaginase |Schizosaccharomyces pombe|chr 2|||Manual	1	1	NaN	NaN	24981000	16973000	8008000
SPBC4C3.03	>SPBC4C3.03 |||homoserine kinase |Schizosaccharomyces pombe|chr 2|||Manual	1	1	NaN	NaN	49927000	16815000	33112000
SPBC3E7.16c	>SPBC3E7.16c |leu3|SPBC4F6.03c|2-isopropylmalate synthase Leu3|Schizosaccharomyces pombe|chr 2|||Manual	1	1	NaN	NaN	51000000	16668000	34332000
SPBC16H5.12c	>SPBC16H5.12c ||SPNGAF91|conserved fungal protein|Schizosaccharomyces pombe|chr 2|||Manual	1	1	NaN	NaN	37795000	16505000	21291000
SPBC1683.03c	>SPBC1683.03c |||membrane transporter |Schizosaccharomyces pombe|chr 2|||Manual	1	1	NaN	NaN	26529000	16483000	10047000
SPCC1322.16	>SPCC1322.16 |phb2||prohibitin Phb2 |Schizosaccharomyces pombe|chr 3|||Manual	2	1	NaN	NaN	32627000	16300000	16327000
SPBC1347.02	>SPBC1347.02 |fkbp39||FKBP-type peptidyl-prolyl cis-trans isomerase |Schizosaccharomyces pombe|chr 2|||Manual	1	1	NaN	NaN	30366000	16286000	14080000
SPAC3G6.04	>SPAC3G6.04 |rnp24||RNA-binding protein Rnp24|Schizosaccharomyces pombe|chr 1|||Manual	1	1	NaN	NaN	28028000	16269000	11759000
SPBC3D6.12	>SPBC3D6.12 |||U3 snoRNA associated protein Dip2 |Schizosaccharomyces pombe|chr 2|||Manual	2	1	NaN	NaN	23447000	16149000	7298000
SPAC23C4.11	>SPAC23C4.11 |atp18||F0-ATPase subunit J |Schizosaccharomyces pombe|chr 1|||Manual	1	1	NaN	NaN	23885000	16073000	7812500
SPAC18G6.07c	>SPAC18G6.07c |mra1||ribosome biogenesis protein Mra1|Schizosaccharomyces pombe|chr 1|||Manual	1	1	NaN	NaN	34913000	16049000	18864000
SPCC1620.08	>SPCC1620.08 |||succinate-CoA ligase beta subunit |Schizosaccharomyces pombe|chr 3|||Manual	1	1	NaN	NaN	41737000	15767000	25970000
SPAC2E1P5.03	>SPAC2E1P5.03 |||DNAJ domain protein Erj5 |Schizosaccharomyces pombe|chr 1|||Manual	1	1	NaN	NaN	28360000	15747000	12613000
SPBC25B2.09c	>SPBC25B2.09c |mrs1|rrs1|mitochondrial and cytoplasmic arginine-tRNA ligase Rrs1/Mrs1 |Schizosaccharomyces pombe|chr 2|||Manual	2	1	NaN	NaN	27671000	15438000	12233000
SPBC646.05c	>SPBC646.05c |erg9||squalene synthase Erg9 |Schizosaccharomyces pombe|chr 2|||Manual	1	1	NaN	NaN	40934000	15381000	25552000
SPAC890.05	>SPAC890.05 |||ribosome biogenesis protein, G-pathc domain, PINX1 family |Schizosaccharomyces pombe|chr 1|||Manual	1	1	NaN	NaN	26337000	15312000	11025000
SPAC22A12.16	>SPAC22A12.16 |||ATP-citrate synthase subunit 2 |Schizosaccharomyces pombe|chr 1|||Manual	2	1	NaN	NaN	40240000	15175000	25065000
SPCC16C4.15	>SPCC16C4.15 |rml2||mitochondrial ribosomal protein subunit L2 |Schizosaccharomyces pombe|chr 3|||Manual	1	1	NaN	NaN	38149000	15097000	23052000
SPAC1851.03	>SPAC1851.03 |ckb1||CK2 family regulatory subunit Ckb1|Schizosaccharomyces pombe|chr 1|||Manual	1	1	NaN	NaN	24501000	15001000	9500000
SPBC405.06	>SPBC405.06 |||DNAJ protein Xdj1 |Schizosaccharomyces pombe|chr 2|||Manual	1	1	NaN	NaN	27696000	14947000	12749000
SPAC3G9.06	>SPAC3G9.06 |frs2||cytoplasmic phenylalanine-tRNA ligase alpha subunit Frs2 |Schizosaccharomyces pombe|chr 1|||Manual	1	1	NaN	NaN	45972000	14720000	31252000
SPCC1919.09	>SPCC1919.09 |tif6||translation initiation factor eIF6|Schizosaccharomyces pombe|chr 3|||Manual	1	1	NaN	NaN	40176000	14707000	25469000
SPAC9E9.03	>SPAC9E9.03 |leu2||3-isopropylmalate dehydratase Leu2 |Schizosaccharomyces pombe|chr 1|||Manual	3	1	NaN	NaN	36547000	14611000	21936000
SPAC31G5.04	>SPAC31G5.04 |lys12||homoisocitrate dehydrogenase Lys12|Schizosaccharomyces pombe|chr 1|||Manual	2	1	NaN	NaN	34522000	14521000	20001000
SPAC23D3.09	>SPAC23D3.09 |arp42|arp4|SWI/SNF and RSC complex subunit Arp42|Schizosaccharomyces pombe|chr 1|||Manual	1	1	NaN	NaN	28052000	14402000	13650000
SPAC17A5.06	>SPAC17A5.06 |ptr8||transcription factor TFIIH complex ERCC-3 subunit|Schizosaccharomyces pombe|chr 1|||Manual	2	1	NaN	NaN	15739000	14378000	1360700
SPBC26H8.03	>SPBC26H8.03 |cho2||phosphatidylethanolamine N-methyltransferase Cho2|Schizosaccharomyces pombe|chr 2|||Manual	4	1	NaN	NaN	23528000	14343000	9184700
SPAC4G9.15	>SPAC4G9.15 |||ketoreductase |Schizosaccharomyces pombe|chr 1|||Manual	1	1	NaN	NaN	25241000	14329000	10912000
SPAC607.05	>SPAC607.05 |rpn9||19S proteasome regulatory subunit Rpn9|Schizosaccharomyces pombe|chr 1|||Manual	1	1	NaN	NaN	41829000	14271000	27558000
SPCC285.14	>SPCC285.14 |trs130||TRAPP complex subunit Trs130 |Schizosaccharomyces pombe|chr 3|||Manual	1	1	NaN	NaN	29713000	14268000	15445000
SPCC576.03c	>SPCC576.03c |tpx1||thioredoxin peroxidase Tpx1|Schizosaccharomyces pombe|chr 3|||Manual	1	1	NaN	NaN	29981000	14223000	15758000
SPAC29B12.04	>SPAC29B12.04 |snz1||pyridoxine biosynthesis protein|Schizosaccharomyces pombe|chr 1|||Manual	1	1	NaN	NaN	27961000	14160000	13801000
SPAC57A7.08	>SPAC57A7.08 |pzh1||serine/threonine protein phosphatase Pzh1|Schizosaccharomyces pombe|chr 1|||Manual	1	1	NaN	NaN	27682000	14030000	13652000
SPAC6B12.07c	>SPAC6B12.07c |||ubiquitin-protein ligase E3 |Schizosaccharomyces pombe|chr 1|||Manual	1	1	NaN	NaN	30115000	14024000	16090000
SPBC19C2.14	>SPBC19C2.14 |smd3||Sm snRNP core protein Smd3|Schizosaccharomyces pombe|chr 2|||Manual	1	1	NaN	NaN	25420000	14020000	11400000
SPBC29A3.06	>SPBC29A3.06 |||CGI-48 family |Schizosaccharomyces pombe|chr 2|||Manual	1	1	NaN	NaN	46229000	13851000	32378000
SPBC16E9.10c	>SPBC16E9.10c |||AAA family ATPase Rix7 |Schizosaccharomyces pombe|chr 2|||Manual	1	1	NaN	NaN	35935000	13744000	22192000
SPBC36.04	>SPBC36.04 |cys11|cys1a|cysteine synthase|Schizosaccharomyces pombe|chr 2|||Manual	1	1	NaN	NaN	29450000	13553000	15896000
SPBC28F2.03	>SPBC28F2.03 |ppi1|cyp2|cyclophilin family peptidyl-prolyl cis-trans isomerase Cyp2|Schizosaccharomyces pombe|chr 2|||Manual	1	1	NaN	NaN	23937000	13498000	10439000
SPBC14F5.13c	>SPBC14F5.13c |||vacuolar membrane alkaline phosphatase |Schizosaccharomyces pombe|chr 2|||Manual	2	1	NaN	NaN	25611000	13467000	12144000
SPBC800.03	>SPBC800.03 |clr3||histone deacetylase |Schizosaccharomyces pombe|chr 2|||Manual	1	1	NaN	NaN	27083000	13426000	13657000
SPBC4B4.09	>SPBC4B4.09 |usp105|prp39|U1 snRNP-associated protein Usp105|Schizosaccharomyces pombe|chr 2|||Manual	1	1	NaN	NaN	30338000	13417000	16920000
SPAC1142.06	>SPAC1142.06 |get3||GET complex ATPase subunit Get3 |Schizosaccharomyces pombe|chr 1|||Manual	1	1	NaN	NaN	29036000	13328000	15708000
SPCC18B5.05c	>SPCC18B5.05c |||phosphomethylpyrimidine kinase |Schizosaccharomyces pombe|chr 3|||Manual	1	1	NaN	NaN	21693000	13279000	8413600
SPAC1B3.12c	>SPAC1B3.12c |rpb10||DNA-directed RNA polymerase I, II, and III subunit Rpb10|Schizosaccharomyces pombe|chr 1|||Manual	1	1	NaN	NaN	25972000	13272000	12700000
SPCP1E11.05c	>SPCP1E11.05c |are2||acyl-coA-sterol acyltransferase Are2 |Schizosaccharomyces pombe|chr 3|||Manual	1	1	NaN	NaN	19490000	13007000	6483200
SPCC794.08	>SPCC794.08 |||HEAT repeat protein, involved in localization to plasma membrane |Schizosaccharomyces pombe|chr 3|||Manual	2	1	NaN	NaN	25880000	12921000	12959000
SPCC1235.15	>SPCC1235.15 |dga1|SPCC548.01|diacylglycerol O-acyltransferase Dga1|Schizosaccharomyces pombe|chr 3|||Manual	1	1	NaN	NaN	25076000	12808000	12268000
SPAC11D3.14c	>SPAC11D3.14c |||oxoprolinase |Schizosaccharomyces pombe|chr 1|||Manual	1	1	NaN	NaN	27216000	12744000	14471000
SPAC11D3.02c	>SPAC11D3.02c |||ELLA family acetyltransferase |Schizosaccharomyces pombe|chr 1|||Manual	1	1	NaN	NaN	22904000	12590000	10314000
SPAC959.08	>SPAC959.08 |rpl2102|rpl21-2, rpl21|60S ribosomal protein L21 |Schizosaccharomyces pombe|chr 1|||Manual	2	1	NaN	NaN	36709000	12477000	24232000
SPBC1A4.05	>SPBC1A4.05 |blt1||Blt1|Schizosaccharomyces pombe|chr 2|||Manual	2	1	NaN	NaN	29809000	12343000	17465000
SPBC1711.16	>SPBC1711.16 |||WD repeat protein |Schizosaccharomyces pombe|chr 2|||Manual	1	1	NaN	NaN	26572000	12306000	14266000
SPAC3C7.01c	>SPAC3C7.01c ||SPAC732.03c|inositol polyphosphate phosphatase |Schizosaccharomyces pombe|chr 1|||Manual	1	1	NaN	NaN	22450000	12238000	10213000
SPAC29B12.06c	>SPAC29B12.06c |rcd1||RNA-binding protein, CCR4-NOT complex subunit Rcd1|Schizosaccharomyces pombe|chr 1|||Manual	1	1	NaN	NaN	28651000	12061000	16590000
SPBC543.02c	>SPBC543.02c |||DNAJ/TPR domain protein DNAJC7 family|Schizosaccharomyces pombe|chr 2|||Manual	1	1	NaN	NaN	38972000	11926000	27046000
SPCC285.03	>SPCC285.03 |||ATP-dependent RNA helicase Dbp6 |Schizosaccharomyces pombe|chr 3|||Manual	2	1	NaN	NaN	28220000	11855000	16365000
SPBP18G5.03	>SPBP18G5.03 |toc1||Tor complex Tor2 interacting protein 1|Schizosaccharomyces pombe|chr 2|||Manual	1	1	NaN	NaN	27850000	11740000	16110000
SPBC16D10.03	>SPBC16D10.03 |pgp2||metallopeptidase Pgp2|Schizosaccharomyces pombe|chr 2|||Manual	1	1	NaN	NaN	31207000	11694000	19513000
SPCC569.01c;SPBC337.02c;SPCP20C8.01c	>SPCC569.01c |||cell surface glycoprotein |Schizosaccharomyces pombe|chr 3|||Manual;>SPBC337.02c |||cell surface glycoprotein |Schizosaccharomyces pombe|chr 2|||Manual;>SPCP20C8.01c |||cell surface glycoprotein |Schizosaccharomyces pombe|chr 3|||Manual	1	1	NaN	NaN	36570000	11678000	24892000
SPBC17G9.04c	>SPBC17G9.04c |nup85|ptr5|nucleoporin Nup85|Schizosaccharomyces pombe|chr 2|||Manual	1	1	NaN	NaN	20941000	11631000	9310200
SPCC794.10	>SPCC794.10 |||UTP-glucose-1-phosphateuridylyltransferase-like|Schizosaccharomyces pombe|chr 3|||Manual	1	1	NaN	NaN	19874000	11586000	8287300
SPBC1539.05	>SPBC1539.05 |cog3||Golgi transport complex subunit Cog3 |Schizosaccharomyces pombe|chr 2|||Manual	1	1	NaN	NaN	24184000	11453000	12731000
SPBC365.03c	>SPBC365.03c |rpl2101|rpl21, rpl21-1|60S ribosomal protein L21 |Schizosaccharomyces pombe|chr 2|||Manual	2	1	NaN	NaN	37086000	11451000	25635000
SPCC74.01	>SPCC74.01 |sly1||SNARE binding protein Sly1 |Schizosaccharomyces pombe|chr 3|||Manual	1	1	NaN	NaN	23088000	11344000	11744000
SPBC428.19c	>SPBC428.19c |utp15||U3 snoRNP protein Utp15 |Schizosaccharomyces pombe|chr 2|||Manual	1	1	NaN	NaN	27522000	11078000	16445000
SPAC2F3.10	>SPAC2F3.10 |vps54||GARP complex subunit Vps54 |Schizosaccharomyces pombe|chr 1|||Manual	1	1	NaN	NaN	28270000	11036000	17234000
SPAPB8E5.03	>SPAPB8E5.03 |mae1||malic acid transport protein Mae1|Schizosaccharomyces pombe|chr 1|||Manual	2	1	NaN	NaN	21701000	11022000	10678000
SPBC244.02c	>SPBC244.02c |||U3 snoRNP-associated protein Utp6 |Schizosaccharomyces pombe|chr 2|||Manual	1	1	NaN	NaN	22523000	10998000	11526000
SPAC1556.01c	>SPAC1556.01c |rad50|SPAP4C9.01c|DNA repair protein Rad50|Schizosaccharomyces pombe|chr 1|||Manual	1	1	NaN	NaN	23726000	10848000	12878000
SPAC3G9.08	>SPAC3G9.08 |png1||ING family homolog Png1|Schizosaccharomyces pombe|chr 1|||Manual	1	1	NaN	NaN	22891000	10737000	12154000
SPAC17C9.10	>SPAC17C9.10 |stm1||G-protein coupled receptor Stm1|Schizosaccharomyces pombe|chr 1|||Manual	1	1	NaN	NaN	19468000	10636000	8832000
SPAC30D11.03	>SPAC30D11.03 |ddx27|drs1|ATP-dependent RNA helicase Ddx27/Drs1 |Schizosaccharomyces pombe|chr 1|||Manual	1	1	NaN	NaN	23313000	10578000	12735000
SPAC630.03	>SPAC630.03 |arp3|act2|actin-like protein Arp3|Schizosaccharomyces pombe|chr 1|||Manual	2	1	NaN	NaN	25209000	10523000	14687000
SPCC1322.13	>SPCC1322.13 |ade6|min1|phosphoribosylaminoimidazole carboxylase Ade6|Schizosaccharomyces pombe|chr 3|||Manual	2	1	NaN	NaN	24304000	10496000	13807000
SPAC23C11.09	>SPAC23C11.09 |ala1|ars1|mitochondrial and cytoplasmic alanine-tRNA ligase Ala1 |Schizosaccharomyces pombe|chr 1|||Manual	1	1	NaN	NaN	28875000	10422000	18453000
SPAC9G1.02	>SPAC9G1.02 |wis4|wak1, wik1|MAP kinase kinase kinase Wis4|Schizosaccharomyces pombe|chr 1|||Manual	2	1	NaN	NaN	22879000	10224000	12655000
SPAC6G9.09c;SPCC330.14c	>SPAC6G9.09c |rpl2401|rpl24-01, rpl24|60S ribosomal protein L24 |Schizosaccharomyces pombe|chr 1|||Manual;>SPCC330.14c |rpl2402|rpl24-2|60S ribosomal protein L24 |Schizosaccharomyces pombe|chr 3|||Manual	1	1	NaN	NaN	19502000	10189000	9312900
SPBC36B7.09	>SPBC36B7.09 |gcn2|ppk28, SPBP18G5.01|eIF2 alpha kinase Gcn2|Schizosaccharomyces pombe|chr 2|||Manual	2	1	NaN	NaN	34230000	10120000	24109000
SPAC9G1.13c	>SPAC9G1.13c |swc4||Swr1 complex subunit Swc4|Schizosaccharomyces pombe|chr 1|||Manual	1	1	NaN	NaN	32202000	10023000	22179000
SPBC106.03	>SPBC106.03 |||DUF1776 family protein|Schizosaccharomyces pombe|chr 2|||Manual	1	1	NaN	NaN	26324000	10013000	16310000
SPAC13D1.01c;SPAC167.08;SPAC19D5.09c;SPAC26A3.13c;SPAC27E2.08;SPAC2E1P3.03c;SPAC9.04;SPAPB15E9.03c;SPBC1289.17;SPBC9B6.02c;SPCC1020.14	>SPAC13D1.01c |Tf2-7||retrotransposable element|Schizosaccharomyces pombe|chr 1|||Manual;>SPAC167.08 |Tf2-2|SPAC1705.01c|retrotransposable element|Schizosaccharomyces pombe|chr 1|||Manual;>SPAC19D5.09c |Tf2-8|SPAC13D1.02c|retrotransposable element|Schizosa	1	1	NaN	NaN	17961000	9991400	7969800
SPBC776.01	>SPBC776.01 |rpl29||60S ribosomal protein L29|Schizosaccharomyces pombe|chr 2|||Manual	1	1	NaN	NaN	18424000	9968500	8455500
SPBC27B12.13	>SPBC27B12.13 |tom40|SPBC8D2.22|mitochondrial TOM complex subunit Tom40 |Schizosaccharomyces pombe|chr 2|||Manual	1	1	NaN	NaN	21339000	9880900	11458000
SPCC320.10	>SPCC320.10 |srp72||signal recognition particle subunit Srp72 |Schizosaccharomyces pombe|chr 3|||Manual	1	1	NaN	NaN	23465000	9841900	13623000
SPAC222.09	>SPAC222.09 |seb1||RNA-binding protein Seb1|Schizosaccharomyces pombe|chr 1|||Manual	1	1	NaN	NaN	15571000	9771800	5799500
SPBC211.07c	>SPBC211.07c |ubc8||ubiquitin conjugating enzyme Ubc8 |Schizosaccharomyces pombe|chr 2|||Manual	1	1	NaN	NaN	26243000	9740700	16502000
SPCC553.02	>SPCC553.02 |||glutamine-dependent NAD|Schizosaccharomyces pombe|chr 3|||Manual	1	1	NaN	NaN	16360000	9675500	6684100
SPAC1F3.09	>SPAC1F3.09 |mug161||CwfJ family protein, splicing factor |Schizosaccharomyces pombe|chr 1|||Manual	1	1	NaN	NaN	18764000	9525500	9238200
SPAC977.14c;SPAC750.01	>SPAC977.14c |||aldo/keto reductase, unknown biological role|Schizosaccharomyces pombe|chr 1|||Manual;>SPAC750.01 |||aldo/keto reductase family protein|Schizosaccharomyces pombe|chr 1|||Manual	1	1	NaN	NaN	20138000	9351100	10787000
SPBC342.04	>SPBC342.04 |rpn1301|rpn13, rpn13a|19S proteasome regulatory subunit Rpn13a|Schizosaccharomyces pombe|chr 2|||Manual	1	1	NaN	NaN	21668000	9333800	12334000
SPBC887.10	>SPBC887.10 |mcs4||response regulator Mcs4|Schizosaccharomyces pombe|chr 2|||Manual	1	1	NaN	NaN	29267000	9248800	20018000
SPAC12G12.01c	>SPAC12G12.01c ||SPAC630.02|ubiquitin-protein ligase E3|Schizosaccharomyces pombe|chr 1|||Manual	1	1	NaN	NaN	24566000	9186600	15380000
SPAC926.07c	>SPAC926.07c |dlc2||dynein light chain Dlc2 |Schizosaccharomyces pombe|chr 1|||Manual	1	1	NaN	NaN	19382000	9147000	10235000
SPAP8A3.08	>SPAP8A3.08 |cdc4||myosin II light chain|Schizosaccharomyces pombe|chr 1|||Manual	3	1	NaN	NaN	23243000	9124500	14119000
SPAC29B12.08	>SPAC29B12.08 |clr5||Clr5 protein|Schizosaccharomyces pombe|chr 1|||Manual	1	1	NaN	NaN	17519000	9115400	8403500
SPBC15D4.01c	>SPBC15D4.01c |klp9|SPBC2D10.21c|kinesin-like protein Klp9|Schizosaccharomyces pombe|chr 2|||Manual	1	1	NaN	NaN	16042000	9109100	6932900
SPBC713.02c	>SPBC713.02c |ubp15|ubpD, ubp21|ubiquitin C-terminal hydrolase Ubp15|Schizosaccharomyces pombe|chr 2|||Manual	1	1	NaN	NaN	22938000	8976000	13962000
SPCC1795.12c	>SPCC1795.12c |||sequence orphan|Schizosaccharomyces pombe|chr 3|||Manual	1	1	NaN	NaN	13986000	8906800	5079500
SPAC17A2.03c	>SPAC17A2.03c |vma6||V-type ATPase V0 subunit d |Schizosaccharomyces pombe|chr 1|||Manual	2	1	NaN	NaN	24071000	8618500	15453000
SPAC20G8.04c	>SPAC20G8.04c |||mitochondrial electron transfer flavoprotein-ubiquinone oxidoreductase |Schizosaccharomyces pombe|chr 1|||Manual	1	1	NaN	NaN	28384000	8601500	19783000
SPAC2E1P3.04	>SPAC2E1P3.04 |cao1|spao1|copper amine oxidase Cao1|Schizosaccharomyces pombe|chr 1|||Manual	1	1	NaN	NaN	15739000	8492400	7246400
SPBC30D10.07c	>SPBC30D10.07c |||biotin-protein ligase |Schizosaccharomyces pombe|chr 2|||Manual	1	1	NaN	NaN	18409000	8458500	9950800
SPAC17H9.12c	>SPAC17H9.12c |||mitochondrial cytochrome c-heme linkage protein Cyc2 |Schizosaccharomyces pombe|chr 1|||Manual	1	1	NaN	NaN	27532000	8340400	19191000
SPBC354.02c	>SPBC354.02c |sec61||translocon alpha subunit Sec61|Schizosaccharomyces pombe|chr 2|||Manual	1	1	NaN	NaN	26481000	8127600	18354000
SPBC16G5.18	>SPBC16G5.18 |erg24||C-14 sterol reductase Erg24 |Schizosaccharomyces pombe|chr 2|||Manual	1	1	NaN	NaN	17555000	8044100	9511300
SPBC1539.09c	>SPBC1539.09c |trp1||anthranilate synthase component II |Schizosaccharomyces pombe|chr 2|||Manual	1	1	NaN	NaN	16967000	7941500	9025400
SPBP8B7.19	>SPBP8B7.19 |spt16||FACT complex component Spt16|Schizosaccharomyces pombe|chr 2|||Manual	2	1	NaN	NaN	48641000	7923400	40718000
SPBC530.03c	>SPBC530.03c |bag102|bag1-b|BAG family molecular chaperone regulator Bag102 |Schizosaccharomyces pombe|chr 2|||Manual	1	1	NaN	NaN	21149000	7838800	13310000
SPAC1565.01	>SPAC1565.01 |||conserved fungal protein|Schizosaccharomyces pombe|chr 1|||Manual	1	1	NaN	NaN	30157000	7837100	22320000
SPAC458.03	>SPAC458.03 |tel2||Tel2/Rad-5/Clk-2 family protein Tel2|Schizosaccharomyces pombe|chr 1|||Manual	2	1	NaN	NaN	12763000	7764400	4998800
SPAC56E4.03	>SPAC56E4.03 |||aromatic aminotransferase |Schizosaccharomyces pombe|chr 1|||Manual	1	1	NaN	NaN	11899000	7762100	4137400
SPCC1682.01	>SPCC1682.01 |qcr9||ubiquinol-cytochrome-c reductase complex subunit 9 |Schizosaccharomyces pombe|chr 3|||Manual	1	1	NaN	NaN	25024000	7759900	17264000
SPBC21B10.04c	>SPBC21B10.04c |nrf1||GTPase regulator Nrf1|Schizosaccharomyces pombe|chr 2|||Manual	1	1	NaN	NaN	14414000	7728400	6685400
SPAC6F6.15	>SPAC6F6.15 |ypt5||GTPase Ypt5|Schizosaccharomyces pombe|chr 1|||Manual	1	1	NaN	NaN	19714000	7568300	12146000
SPCC31H12.05c	>SPCC31H12.05c |sds21||serine/threonine protein phosphatase Sds21|Schizosaccharomyces pombe|chr 3|||Manual	1	1	NaN	NaN	14931000	7536900	7394100
SPAC1782.07	>SPAC1782.07 |qcr8||ubiquinol-cytochrome-c reductase complex subunit 7|Schizosaccharomyces pombe|chr 1|||Manual	1	1	NaN	NaN	19371000	7486500	11885000
SPBC336.10c;SPAC26H5.10c	>SPBC336.10c |tif512||translation elongation factor eIF5A |Schizosaccharomyces pombe|chr 2|||Manual;>SPAC26H5.10c |tif51||translation elongation factor eIF5A |Schizosaccharomyces pombe|chr 1|||Manual	1	1	NaN	NaN	18989000	7446200	11543000
SPBC336.04	>SPBC336.04 |cdc6|pol3, pold, mis10|DNA polymerase delta catalytic subunit Cdc6|Schizosaccharomyces pombe|chr 2|||Manual	1	1	NaN	NaN	14762000	7381700	7380100
SPBC19G7.17	>SPBC19G7.17 ||SPBC36B7.01|translocon subunit Sec61 homolog |Schizosaccharomyces pombe|chr 2|||Manual	1	1	NaN	NaN	18993000	7372000	11621000
SPAC23D3.02	>SPAC23D3.02 |rfc2||DNA replication factor C complex subunit Rfc2|Schizosaccharomyces pombe|chr 1|||Manual	1	1	NaN	NaN	16588000	7362300	9225500
SPAC22E12.07	>SPAC22E12.07 |rna1||Ran GAP Rna1|Schizosaccharomyces pombe|chr 1|||Manual	1	1	NaN	NaN	12308000	7326800	4981600
SPBC27B12.03c	>SPBC27B12.03c |erg32||C-5 sterol desaturase Erg32|Schizosaccharomyces pombe|chr 2|||Manual	2	1	NaN	NaN	21500000	7225600	14274000
SPAC222.14c	>SPAC222.14c |||GTP binding protein Sey1 |Schizosaccharomyces pombe|chr 1|||Manual	2	1	NaN	NaN	13801000	7180200	6620700
SPAC6F12.11c	>SPAC6F12.11c |sfc1||transcription factor TFIIIC complex A box associated subunit Sfc1|Schizosaccharomyces pombe|chr 1|||Manual	1	1	NaN	NaN	15449000	7122700	8325800
SPBC3F6.02c	>SPBC3F6.02c |||3 beta-hydroxysteroid dehydrogenase/delta 5-->4-isomerase |Schizosaccharomyces pombe|chr 2|||Manual	3	1	NaN	NaN	17659000	7040200	10618000
SPBC25D12.04	>SPBC25D12.04 |suc22||ribonucleotide reductase small subunit Suc22|Schizosaccharomyces pombe|chr 2|||Manual	1	1	NaN	NaN	16374000	6999700	9373800
SPAC9.10	>SPAC9.10 |thi9||thiamine transporter Thi9|Schizosaccharomyces pombe|chr 1|||Manual	1	1	NaN	NaN	16547000	6999300	9547400
SPCC4B3.04c	>SPCC4B3.04c |nte1||lysophospholipase |Schizosaccharomyces pombe|chr 3|||Manual	2	1	NaN	NaN	16645000	6887300	9757300
SPCC736.12c	>SPCC736.12c |mmi1||YTH family RNA binding protein Mmi1|Schizosaccharomyces pombe|chr 3|||Manual	1	1	NaN	NaN	20431000	6792300	13639000
SPAC824.06	>SPAC824.06 |tim14||TIM23 translocase complex subunit Tim14 |Schizosaccharomyces pombe|chr 1|||Manual	1	1	NaN	NaN	11087000	6720300	4366700
SPBC543.06c	>SPBC543.06c |dbp8||ATP-dependent RNA helicase Dbp8 |Schizosaccharomyces pombe|chr 2|||Manual	1	1	NaN	NaN	19884000	6619400	13265000
SPAC20G4.08	>SPAC20G4.08 ||SPAC4F10.01|conserved fungal protein|Schizosaccharomyces pombe|chr 1|||Manual	1	1	NaN	NaN	18736000	6595400	12140000
SPAC1805.17	>SPAC1805.17 |crm1|caf2, SPAC1B2.01|importin family nuclear export receptor Crm1|Schizosaccharomyces pombe|chr 1|||Manual	2	1	NaN	NaN	10450000	6405700	4044200
SPCC16A11.17	>SPCC16A11.17 |mcm4|cdc21, SPCC24B10.01|MCM complex subunit Mcm4/Cdc21|Schizosaccharomyces pombe|chr 3|||Manual	1	1	NaN	NaN	15336000	6375100	8961000
SPCC1259.02c	>SPCC1259.02c |||Endoplasmic Reticulum metallopeptidase 1 |Schizosaccharomyces pombe|chr 3|||Manual	1	1	NaN	NaN	10190000	6345500	3844900
SPCC1235.09	>SPCC1235.09 |hif2||Set3 complex subunit Hif2|Schizosaccharomyces pombe|chr 3|||Manual	1	1	NaN	NaN	17930000	6289100	11641000
SPAC637.10c	>SPAC637.10c |rpn10|pus1|19S proteasome regulatory subunit Rpn10|Schizosaccharomyces pombe|chr 1|||Manual	1	1	NaN	NaN	10766000	6123700	4642100
SPBC1105.01	>SPBC1105.01 |rrp12|SPBPB7E8.03|rRNA processing protein Rrp12-like |Schizosaccharomyces pombe|chr 2|||Manual	1	1	NaN	NaN	11621000	6064200	5556800
SPBC409.18	>SPBC409.18 |||phosphatidic acid phosphatase |Schizosaccharomyces pombe|chr 2|||Manual	1	1	NaN	NaN	12569000	6062000	6506900
SPAC823.08c	>SPAC823.08c |||ATP-dependent RNA helicase Rrp3 |Schizosaccharomyces pombe|chr 1|||Manual	1	1	NaN	NaN	13380000	6033300	7347200
SPBP16F5.08c	>SPBP16F5.08c |||flavin dependent monooxygenase |Schizosaccharomyces pombe|chr 2|||Manual	1	1	NaN	NaN	15742000	5751400	9990100
SPBC25H2.13c	>SPBC25H2.13c |cdc20|pol2|DNA polymerase epsilon catalytic subunit Pol2|Schizosaccharomyces pombe|chr 2|||Manual	1	1	NaN	NaN	10818000	5635400	5182600
SPAC4D7.01c	>SPAC4D7.01c |sec71|sec7a, SPAP8A3.15c|Sec7 domain protein, ARF GEF |Schizosaccharomyces pombe|chr 1|||Manual	1	1	NaN	NaN	17095000	5625600	11469000
SPBC1E8.02	>SPBC1E8.02 |||ubiquitin family protein |Schizosaccharomyces pombe|chr 2|||Manual	1	1	NaN	NaN	14397000	5527500	8869700
SPAC57A7.11	>SPAC57A7.11 |mip1||WD repeat protein, Raptor homolog Mip1|Schizosaccharomyces pombe|chr 1|||Manual	1	1	NaN	NaN	15248000	5473400	9774900
SPCC4B3.03c	>SPCC4B3.03c |||mitochondrial morphology protein |Schizosaccharomyces pombe|chr 3|||Manual	1	1	NaN	NaN	18117000	5362700	12754000
SPAC1782.01	>SPAC1782.01 |ecm29|SPAPYUG7.07|proteasome component Ecm29|Schizosaccharomyces pombe|chr 1|||Manual	1	1	NaN	NaN	14082000	5218500	8863400
SPAC17A2.02c	>SPAC17A2.02c |||DUF887 family protein|Schizosaccharomyces pombe|chr 1|||Manual	1	1	NaN	NaN	9687400	5202700	4484700
SPBP19A11.07c	>SPBP19A11.07c ||SPBP4H10.02c|human C17orf28 ortholog 2|Schizosaccharomyces pombe|chr 2|||Manual	1	1	NaN	NaN	11117000	5007300	6109900
SPAC31A2.16	>SPAC31A2.16 |gef2||RhoGEF Gef2|Schizosaccharomyces pombe|chr 1|||Manual	1	1	NaN	NaN	17549000	4912900	12637000
SPAC12B10.14c	>SPAC12B10.14c |ppk2||serine/threonine protein kinase Ppk2 |Schizosaccharomyces pombe|chr 1|||Manual	1	1	NaN	NaN	12550000	4839800	7709900
SPAC19A8.08	>SPAC19A8.08 |upf2||nonsense-mediated decay protein Upf2|Schizosaccharomyces pombe|chr 1|||Manual	2	1	NaN	NaN	11750000	4730000	7019500
SPBC30D10.03c	>SPBC30D10.03c |||IMP 5-nucleotidase |Schizosaccharomyces pombe|chr 2|||Manual	1	1	NaN	NaN	13359000	4678700	8680000
SPBC428.04	>SPBC428.04 |apq12||nuclear membrane organization protein Apq12 |Schizosaccharomyces pombe|chr 2|||Manual	1	1	NaN	NaN	11271000	4618700	6652700
SPBC36.05c	>SPBC36.05c |clr6||histone deacetylase |Schizosaccharomyces pombe|chr 2|||Manual	1	1	NaN	NaN	10241000	4560400	5680500
SPBP8B7.29	>SPBP8B7.29 |||para-aminobenzoate synthase |Schizosaccharomyces pombe|chr 2|||Manual	1	1	NaN	NaN	19105000	4239600	14866000
SPCC330.12c	>SPCC330.12c |sdh3||succinate dehydrogenase |Schizosaccharomyces pombe|chr 3|||Manual	1	1	NaN	NaN	10560000	4162300	6397400
SPBC1734.16c	>SPBC1734.16c |pst3||SIN3 family co-repressor Pst3|Schizosaccharomyces pombe|chr 2|||Manual	1	1	NaN	NaN	10599000	4160100	6438700
SPAC22A12.07c	>SPAC22A12.07c |ogm1|oma1|protein O-mannosyltransferase Ogm1|Schizosaccharomyces pombe|chr 1|||Manual	1	1	NaN	NaN	6825000	4105700	2719300
SPBC3H7.05c	>SPBC3H7.05c |||mitochondrial Membrane Bound O-Acyl Transferase |Schizosaccharomyces pombe|chr 2|||Manual	1	1	NaN	NaN	11827000	4072000	7755100
SPCC306.09c	>SPCC306.09c |cap1|cap|adenylyl cyclase-associated protein Cap1|Schizosaccharomyces pombe|chr 3|||Manual	1	1	NaN	NaN	11791000	4066300	7725200
SPAC1805.06c	>SPAC1805.06c |hem2||porphobilinogen synthase Hem2 |Schizosaccharomyces pombe|chr 1|||Manual	1	1	NaN	NaN	10965000	4052800	6912000
SPBC211.06	>SPBC211.06 |gfh1||gamma tubulin complex subunit Gfh1|Schizosaccharomyces pombe|chr 2|||Manual	2	1	NaN	NaN	15080000	4009300	11070000
SPAC29A4.11	>SPAC29A4.11 |rga3||Rho-type GTPase activating protein Rga3|Schizosaccharomyces pombe|chr 1|||Manual	1	1	NaN	NaN	9947100	3997900	5949200
SPAC17G6.16c	>SPAC17G6.16c |ysh1||mRNA cleavage and polyadenylation specificity factor complex endoribonuclease subunit Ysh1|Schizosaccharomyces pombe|chr 1|||Manual	1	1	NaN	NaN	22348000	3940200	18408000
SPAC630.13c	>SPAC630.13c |tsc2||tuberin|Schizosaccharomyces pombe|chr 1|||Manual	1	1	NaN	NaN	11851000	3918300	7932400
SPCC1672.06c	>SPCC1672.06c |asp1|vip1|inositol hexakisphosphate kinase/inositol pyrophosphate synthase |Schizosaccharomyces pombe|chr 3|||Manual	1	1	NaN	NaN	11400000	3883200	7517100
SPBC887.14c	>SPBC887.14c |pfh1|pif1|5 to 3 DNA helicase, involved in DNA recombination and repair Pif1|Schizosaccharomyces pombe|chr 2|||Manual	1	1	NaN	NaN	11639000	3880900	7758500
SPCC1322.14c	>SPCC1322.14c |vtc4||vacuolar transporter chaperone |Schizosaccharomyces pombe|chr 3|||Manual	1	1	NaN	NaN	7175200	3805200	3370000
SPAC1F5.06	>SPAC1F5.06 |lsh1||ER heat shock protein Lhs1 |Schizosaccharomyces pombe|chr 1|||Manual	1	1	NaN	NaN	10417000	3779700	6637700
SPAC26A3.10	>SPAC26A3.10 |cnt6||centaurin ADOP ribosylation factor GTPase activating protein family |Schizosaccharomyces pombe|chr 1|||Manual	1	1	NaN	NaN	12298000	3759000	8538700
SPCC970.06	>SPCC970.06 |||cargo receptor for soluble proteins |Schizosaccharomyces pombe|chr 3|||Manual	1	1	NaN	NaN	6140100	3744400	2395600
SPCC965.10	>SPCC965.10 |||transcription factor |Schizosaccharomyces pombe|chr 3|||Manual	1	1	NaN	NaN	6374700	3704900	2669800
SPBC21C3.20c	>SPBC21C3.20c |git1||C2 domain protein Git1|Schizosaccharomyces pombe|chr 2|||Manual	1	1	NaN	NaN	16264000	3676300	12588000
SPAC1A6.09c	>SPAC1A6.09c |lag1||sphingosine N-acyltransferase Lag1|Schizosaccharomyces pombe|chr 1|||Manual	1	1	NaN	NaN	8740200	3355900	5384300
SPBC83.15	>SPBC83.15 |||ribosome biogenesis protein Nsa1 |Schizosaccharomyces pombe|chr 2|||Manual	1	1	NaN	NaN	13781000	3304700	10477000
SPAC11D3.09	>SPAC11D3.09 |||agmatinase |Schizosaccharomyces pombe|chr 1|||Manual	1	1	NaN	NaN	7103600	3223100	3880500
SPBC83.14c	>SPBC83.14c |rfc5||DNA replication factor C complex subunit Rfc5 |Schizosaccharomyces pombe|chr 2|||Manual	1	1	NaN	NaN	17759000	3175200	14584000
SPAC1805.11c	>SPAC1805.11c |rps2602|rps26-2|40S ribosomal protein S26 |Schizosaccharomyces pombe|chr 1|||Manual	2	1	NaN	NaN	6817700	2929000	3888700
SPBC24C6.05	>SPBC24C6.05 |sec28||coatomer epsilon subunit |Schizosaccharomyces pombe|chr 2|||Manual	3	1	NaN	NaN	7286700	2892600	4394100
SPAC4F8.12c	>SPAC4F8.12c |spp42|cwf6|U5 snRNP complex subunit Spp42|Schizosaccharomyces pombe|chr 1|||Manual	1	1	NaN	NaN	7192600	2238600	4953900
SPAC19G12.08	>SPAC19G12.08 |scs7||sphingosine hydroxylase Scs7|Schizosaccharomyces pombe|chr 1|||Manual	2	1	NaN	NaN	4310800	2145000	2165800
SPAC17A2.01	>SPAC17A2.01 |bsu1|sod1, car1, SPAC1B1.05, bsu1|high-affinity import carrier for pyridoxine, pyridoxal, and pyridoxamine Bsu1|Schizosaccharomyces pombe|chr 1|||Manual	1	1	NaN	NaN	4027000	1795100	2231900
SPAC1952.11c	>SPAC1952.11c |ure2||urease Ure2|Schizosaccharomyces pombe|chr 1|||Manual	1	1	NaN	NaN	6623800	1702900	4920900
SPBC4B4.08	>SPBC4B4.08 |ght2||hexose transporter Ght2|Schizosaccharomyces pombe|chr 2|||Manual	1	1	NaN	NaN	16452000	1695300	14757000
SPCC825.01	>SPCC825.01 |||ribosome biogenesis ATPase, Arb family ABCF1-like |Schizosaccharomyces pombe|chr 3|||Manual	1	1	NaN	NaN	3862300	1686000	2176300
SPBC1271.14	>SPBC1271.14 |||glutamate N-acetyltransferase |Schizosaccharomyces pombe|chr 2|||Manual	1	1	NaN	NaN	2310800	1580300	730470
SPCC23B6.05c	>SPCC23B6.05c |ssb3|rpa3|DNA replication factor A subunit Ssb3|Schizosaccharomyces pombe|chr 3|||Manual	1	1	NaN	NaN	8266800	1552000	6714800
SPCC1620.14c	>SPCC1620.14c |snf22|SPCC830.01c|ATP-dependent DNA helicase Snf22|Schizosaccharomyces pombe|chr 3|||Manual	1	1	NaN	NaN	5070100	1410900	3659200
SPBC31F10.15c	>SPBC31F10.15c |atp15||F0-ATPase epsilon subunit |Schizosaccharomyces pombe|chr 2|||Manual	1	1	NaN	NaN	2796000	1368700	1427300
SPBC3E7.15c	>SPBC3E7.15c |lac1|SPBC4F6.02c, mug83|sphingosine N-acyltransferase Lac1|Schizosaccharomyces pombe|chr 2|||Manual	1	1	NaN	NaN	2771800	1331200	1440700
SPBC19G7.05c	>SPBC19G7.05c |bgs1|cps1, drc1|1,3-beta-glucan synthase catalytic subunit Bgs1|Schizosaccharomyces pombe|chr 2|||Manual	3	1	NaN	NaN	2970800	1303300	1667400
SPCC11E10.08	>SPCC11E10.08 |rik1||silencing protein Rik1|Schizosaccharomyces pombe|chr 3|||Manual	1	1	NaN	NaN	12523000	452400	12071000
SPAC23C4.12	>SPAC23C4.12 |hhp2||serine/threonine protein kinase Hhp2|Schizosaccharomyces pombe|chr 1|||Manual	2	2	7.2089	8.7981	39989000	36926000	3062600
SPCC13B11.01	>SPCC13B11.01 |adh1|adh|alcohol dehydrogenase Adh1|Schizosaccharomyces pombe|chr 3|||Manual	16	24	3.6089	3.8223	3991100000	3308100000	682950000
SPAC23C11.16	>SPAC23C11.16 |plo1||Polo kinase Plo1|Schizosaccharomyces pombe|chr 1|||Manual	4	3	2.9643	3.3995	386540000	238420000	148120000
SPAC227.18	>SPAC227.18 |lys3|SPAC2F7.01|saccharopine dehydrogenase Lys3|Schizosaccharomyces pombe|chr 1|||Manual	3	2	2.5857	3.1735	250140000	191980000	58162000
SPAC26F1.03	>SPAC26F1.03 |pda1||pyruvate dehydrogenase e1 component alpha subunit Pda1 |Schizosaccharomyces pombe|chr 1|||Manual	37	119	2.6974	2.9797	85519000000	66047000000	19473000000
SPAC644.04	>SPAC644.04 |pct1||RNA 5-triphosphatase|Schizosaccharomyces pombe|chr 1|||Manual	2	9	3.0518	2.9332	1701800000	1297900000	403870000
SPCC794.07	>SPCC794.07 |lat1||dihydrolipoamide S-acetyltransferase E2, Lat1 |Schizosaccharomyces pombe|chr 3|||Manual	24	140	2.5124	2.9272	77479000000	60702000000	16777000000
SPBC6B1.05c	>SPBC6B1.05c |atg7||ubiquitin-like conjugating enzyme Atg7|Schizosaccharomyces pombe|chr 2|||Manual	1	2	2.5474	2.9179	31486000	21274000	10212000
SPBC1921.07c	>SPBC1921.07c |sgf29|SPBC21D10.13|SAGA complex subunit Sgf29|Schizosaccharomyces pombe|chr 2|||Manual	5	2	2.3008	2.7138	292780000	220130000	72655000
SPAC15A10.02	>SPAC15A10.02 |taf12||transcription factor TFIID complex subunit A/ SAGA complex subunit|Schizosaccharomyces pombe|chr 1|||Manual	3	3	1.9475	2.6636	561410000	397930000	163480000
SPAC1952.05	>SPAC1952.05 |gcn5|kat2|SAGA complex histone acetyltransferase catalytic subunit Gcn5|Schizosaccharomyces pombe|chr 1|||Manual	7	14	2.2282	2.4757	2453900000	1755600000	698230000
SPAC23D3.06c	>SPAC23D3.06c |nup146||nucleoporin Nup146|Schizosaccharomyces pombe|chr 1|||Manual	1	2	2.0008	2.4416	28075000	20138000	7937000
SPAC4D7.10c	>SPAC4D7.10c |spt20||SAGA complex subunit Spt20|Schizosaccharomyces pombe|chr 1|||Manual	5	9	1.9437	2.3855	1171300000	810880000	360390000
SPCC1259.09c	>SPCC1259.09c |pdx1||pyruvate dehydrogenase protein x component, Pdx1 |Schizosaccharomyces pombe|chr 3|||Manual	11	15	2.2298	2.3805	3932100000	2855300000	1076900000
SPBC30D10.13c	>SPBC30D10.13c |pdb1||pyruvate dehydrogenase e1 component beta subunit Pdb1|Schizosaccharomyces pombe|chr 2|||Manual	24	109	2.2339	2.3091	81427000000	62434000000	18992000000
SPBC28F2.10c	>SPBC28F2.10c |ngg1|ada3|SAGA complex subunit Ngg1|Schizosaccharomyces pombe|chr 2|||Manual	2	2	1.8121	2.2999	289370000	191160000	98209000
SPBC14C8.17c	>SPBC14C8.17c |spt8|sep9|SAGA complex subunit Spt8|Schizosaccharomyces pombe|chr 2|||Manual	3	5	1.8419	2.2493	1440300000	983600000	456700000
SPAC6F6.03c	>SPAC6F6.03c |||ribosome export GTPase |Schizosaccharomyces pombe|chr 1|||Manual	3	2	1.7835	2.2309	136160000	81519000	54638000
SPCC16C4.18c	>SPCC16C4.18c |taf6|taf50|histone H4-like TAF Taf6, SAGA complex subunit|Schizosaccharomyces pombe|chr 3|||Manual	7	8	1.8096	2.2244	922930000	638870000	284060000
SPAC1002.09c	>SPAC1002.09c |dld1|dldh|dihydrolipoamide dehydrogenase Dld1|Schizosaccharomyces pombe|chr 1|||Manual	10	22	2.3119	2.1909	3946800000	2893500000	1053300000
SPCC61.02	>SPCC61.02 |spt3||SAGA complex subunit Spt3|Schizosaccharomyces pombe|chr 3|||Manual	5	8	1.6803	2.1627	1645500000	1139700000	505770000
SPBC21H7.02	>SPBC21H7.02 |taf10||SAGA complex/transcription factor TFIID complex subunit Taf10|Schizosaccharomyces pombe|chr 2|||Manual	3	4	1.7682	2.0981	319370000	219690000	99685000
SPBC25H2.11c	>SPBC25H2.11c |spt7||SAGA complex bromodomain subunit Spt7|Schizosaccharomyces pombe|chr 2|||Manual	21	39	1.7004	2.0874	6259200000	4264700000	1994500000
SPBP16F5.03c	>SPBP16F5.03c |tra1||SAGA complex phosphatidylinositol pseudokinase Tra1|Schizosaccharomyces pombe|chr 2|||Manual	235	329	1.7988	2.0742	49261000000	33086000000	16175000000
SPBC887.18c	>SPBC887.18c |hfi1||SAGA complex subunit Hfi1|Schizosaccharomyces pombe|chr 2|||Manual	12	22	1.9762	2.0565	4680300000	3238500000	1441800000
SPCC24B10.08c	>SPCC24B10.08c |ada2||SAGA complex subunit Ada2|Schizosaccharomyces pombe|chr 3|||Manual	3	3	1.8834	2.016	968300000	638460000	329840000
SPAC6G10.08	>SPAC6G10.08 |idp1||isocitrate dehydrogenase Idp1 |Schizosaccharomyces pombe|chr 1|||Manual	3	4	1.5801	1.9415	383910000	244030000	139880000
SPBC4F6.18c	>SPBC4F6.18c |arf1||ADP-ribosylation factor, Arf family Arf1|Schizosaccharomyces pombe|chr 2|||Manual	2	2	1.5445	1.9349	111350000	67129000	44220000
SPCC622.08c;SPAC19G12.06c	>SPCC622.08c |hta1||histone H2A alpha|Schizosaccharomyces pombe|chr 3|||Manual;>SPAC19G12.06c |hta2||histone H2A beta|Schizosaccharomyces pombe|chr 1|||Manual	4	8	1.5007	1.9249	3839400000	2474500000	1364800000
SPCC622.09	>SPCC622.09 |htb1||histone H2B Htb1|Schizosaccharomyces pombe|chr 3|||Manual	3	3	1.5516	1.9002	6358400000	4251400000	2107100000
SPCC5E4.03c	>SPCC5E4.03c |taf5|taf72|SAGA complex subunit/TATA-binding protein associated factor/transcription factor TFIID complex subunit Taf5|Schizosaccharomyces pombe|chr 3|||Manual	12	15	1.6923	1.8821	2232200000	1531400000	700780000
SPAC1783.05;SPAC3G6.01	>SPAC1783.05 |hrp1|chd1|ATP-dependent DNA helicase Hrp1|Schizosaccharomyces pombe|chr 1|||Manual	7	7	1.535	1.8817	253990000	168650000	85335000
SPBC1703.14c	>SPBC1703.14c |top1||DNA topoisomerase I|Schizosaccharomyces pombe|chr 2|||Manual	2	2	1.5317	1.8577	109900000	71953000	37950000
SPAC13G7.01c	>SPAC13G7.01c |erg7|SPAC4G9.21c|lanosterol synthase Erg7 |Schizosaccharomyces pombe|chr 1|||Manual	2	2	1.654	1.8416	12288000	6453900	5833800
SPAC12G12.05c	>SPAC12G12.05c |taf9||SAGA complex/ transcription initiation factor Taf9|Schizosaccharomyces pombe|chr 1|||Manual	2	4	1.4644	1.7825	412720000	279510000	133210000
SPCC364.07	>SPCC364.07 ||SPCC4G3.01|D-3 phosphoglycerate dehydrogenase |Schizosaccharomyces pombe|chr 3|||Manual	2	2	1.459	1.7808	37544000	24999000	12545000
SPAC1834.03c;SPBC1105.12;SPBC8D2.03c	>SPAC1834.03c |hhf1|h4.1|histone H4 h4.1|Schizosaccharomyces pombe|chr 1|||Manual;>SPBC1105.12 |hhf3|h4.3|histone H4 h4.3|Schizosaccharomyces pombe|chr 2|||Manual;>SPBC8D2.03c |hhf2|ams3, h4.2|histone H4 h4.2|Schizosaccharomyces pombe|chr 2|||Manual	11	16	1.431	1.7704	4063600000	2630700000	1432900000
SPBC1685.13	>SPBC1685.13 |fhn1||Fhn1 plasma membrane organization protein|Schizosaccharomyces pombe|chr 2|||Manual	3	3	1.4118	1.7252	50603000	34119000	16484000
SPAC27F1.06c	>SPAC27F1.06c |||FKBP-type peptidyl-prolyl cis-trans isomerase |Schizosaccharomyces pombe|chr 1|||Manual	2	2	1.4128	1.7219	65027000	42266000	22761000
SPCC1672.02c	>SPCC1672.02c |sap1||switch-activating protein Sap1|Schizosaccharomyces pombe|chr 3|||Manual	3	2	1.4781	1.7091	142320000	88231000	54092000
SPAC29B12.01	>SPAC29B12.01 |ino80|SPAC3G6.12|SNF2 family helicase Ino80|Schizosaccharomyces pombe|chr 1|||Manual	3	3	1.4883	1.7053	37678000	20483000	17195000
SPBC887.15c	>SPBC887.15c |sur2||sphingosine hydroxylase Sur2|Schizosaccharomyces pombe|chr 2|||Manual	2	2	1.4214	1.6138	70942000	33045000	37898000
SPBC691.03c	>SPBC691.03c |apl3||AP-2 adaptor complex subunit Alp3 |Schizosaccharomyces pombe|chr 2|||Manual	3	2	1.3632	1.6104	68918000	37917000	31000000
SPBC1105.04c	>SPBC1105.04c |cbp1|abp1|CENP-B homolog|Schizosaccharomyces pombe|chr 2|||Manual	2	2	1.3167	1.6074	74486000	41573000	32913000
SPAC13A11.02c	>SPAC13A11.02c |erg11||sterol 14-demethylase |Schizosaccharomyces pombe|chr 1|||Manual	2	2	1.353	1.6033	129860000	79175000	50685000
SPAC20G4.01	>SPAC20G4.01 |caf16|SPAC22F8.13|CCR4-Not complex subunit Caf16 |Schizosaccharomyces pombe|chr 1|||Manual	2	2	1.3061	1.5926	33487000	19238000	14249000
SPAC20G8.03	>SPAC20G8.03 |itr2||MFS myo-inositol transporter|Schizosaccharomyces pombe|chr 1|||Manual	2	2	1.4074	1.5692	18904000	11881000	7023000
SPAC10F6.13c	>SPAC10F6.13c |||aspartate aminotransferase |Schizosaccharomyces pombe|chr 1|||Manual	3	3	1.2759	1.5635	258990000	142150000	116840000
SPBC1826.01c	>SPBC1826.01c |mot1||TATA-binding protein associated factor Mot1 |Schizosaccharomyces pombe|chr 2|||Manual	3	3	1.3216	1.5634	187180000	113870000	73315000
SPAC607.03c	>SPAC607.03c |snu13||U3 snoRNP-associated protein Snu13|Schizosaccharomyces pombe|chr 1|||Manual	4	4	1.2665	1.5409	863340000	488130000	375210000
SPCC576.09	>SPCC576.09 |rps20||40S ribosomal protein S20 |Schizosaccharomyces pombe|chr 3|||Manual	3	3	1.2239	1.5004	43424000	25033000	18391000
SPAC140.02	>SPAC140.02 |gar2||nucleolar protein required for rRNA processing|Schizosaccharomyces pombe|chr 1|||Manual	3	2	1.153	1.4999	238940000	135760000	103180000
SPBC530.05	>SPBC530.05 |||transcription factor |Schizosaccharomyces pombe|chr 2|||Manual	4	3	1.2733	1.4602	84132000	46029000	38103000
SPAC4F10.09c	>SPAC4F10.09c |||ribosome biogenesis protein Noc1 |Schizosaccharomyces pombe|chr 1|||Manual	4	4	1.2732	1.4597	114530000	58313000	56219000
SPAC1786.03	>SPAC1786.03 |cut11|SPAC24C9.01|spindle pole body docking protein Cut11|Schizosaccharomyces pombe|chr 1|||Manual	6	6	1.2191	1.4423	90339000	48823000	41515000
SPCC550.14	>SPCC550.14 |vgl1||vigilin |Schizosaccharomyces pombe|chr 3|||Manual	3	3	1.3024	1.4415	141860000	88164000	53697000
SPBC902.02c	>SPBC902.02c |ctf18|chl12|RFC-like complex subunit Ctf18|Schizosaccharomyces pombe|chr 2|||Manual	2	2	1.0929	1.4178	63992000	56526000	7466400
SPAC4G9.09c	>SPAC4G9.09c |arg11||N-acetyl-gamma-glutamyl-phosphate reductase/acetylglutamate kinase|Schizosaccharomyces pombe|chr 1|||Manual	10	12	1.2921	1.4133	1237600000	735710000	501910000
SPCC1235.14	>SPCC1235.14 |ght5||hexose transporter Ght5|Schizosaccharomyces pombe|chr 3|||Manual	5	2	1.1789	1.4091	234590000	119610000	114990000
SPBC1711.05	>SPBC1711.05 |||nucleocytoplasmic transport chaperone Srp40 |Schizosaccharomyces pombe|chr 2|||Manual	4	5	1.4082	1.4024	434660000	259350000	175300000
SPAC664.02c	>SPAC664.02c |arp8||actin-like protein, Ino80 complex subunit Arp8|Schizosaccharomyces pombe|chr 1|||Manual	2	2	1.2135	1.398	23980000	13388000	10592000
SPAC29A4.04c	>SPAC29A4.04c |cbf5||pseudouridylate synthase Cbf5 |Schizosaccharomyces pombe|chr 1|||Manual	21	26	1.0961	1.3553	2071100000	1164000000	907070000
SPCC1682.02c	>SPCC1682.02c |mcm3||MCM complex subunit Mcm3|Schizosaccharomyces pombe|chr 3|||Manual	2	2	1.0623	1.3361	44510000	21490000	23020000
SPBP8B7.16c	>SPBP8B7.16c |dbp2||ATP-dependent RNA helicase Dbp2|Schizosaccharomyces pombe|chr 2|||Manual	3	3	1.0379	1.3312	179140000	73456000	105680000
SPAP27G11.13c	>SPAP27G11.13c |nop10||snoRNP pseudouridylase box H/ACA snoRNP complex protein |Schizosaccharomyces pombe|chr 1|||Manual	4	11	1.1032	1.3293	497710000	279200000	218510000
SPBC119.10	>SPBC119.10 |asn1||asparagine synthetase|Schizosaccharomyces pombe|chr 2|||Manual	1	2	1.0839	1.3265	138680000	82943000	55741000
SPAC18B11.10	>SPAC18B11.10 |tup11||transcriptional corepressor Tup11|Schizosaccharomyces pombe|chr 1|||Manual	2	2	1.0243	1.3254	46903000	24715000	22188000
SPAC1635.01	>SPAC1635.01 |||mitochondrial outer membrane voltage-dependent anion-selective channel |Schizosaccharomyces pombe|chr 1|||Manual	2	3	1.0638	1.3065	550760000	299970000	250790000
SPBC646.10c	>SPBC646.10c |||U3 snoRNP protein Nop56 |Schizosaccharomyces pombe|chr 2|||Manual	26	41	1.1529	1.3017	3969100000	2254300000	1714800000
SPAC1834.11c	>SPAC1834.11c |sec18||secretory pathway protein Sec18 |Schizosaccharomyces pombe|chr 1|||Manual	2	2	1.1264	1.2904	87851000	54940000	32910000
SPCC1235.02	>SPCC1235.02 |bio2|SPCC320.01c|biotin synthase|Schizosaccharomyces pombe|chr 3|||Manual	4	5	1.0583	1.2898	292920000	171530000	121400000
SPBC2D10.10c	>SPBC2D10.10c |fib1|fib|fibrillarin|Schizosaccharomyces pombe|chr 2|||Manual	10	15	1.0477	1.2876	3947800000	2079600000	1868200000
SPCC613.10	>SPCC613.10 |qcr2||ubiquinol-cytochrome-c reductase complex core protein Qcr2 |Schizosaccharomyces pombe|chr 3|||Manual	3	3	1.0474	1.2822	127250000	60436000	66813000
[truncated: 413 more rows]
