# Supplementary material for: Exportin Crm1 is repurposed as a docking protein to generate microtubule organizing centers at the nuclear pore
Source: eLife. 2018 May 29;7:e33465. doi: 10.7554/eLife.33465 (PMC6008054; doi:10.7554/eLife.33465)
Supplement: Supplementary file 3. [file elife-33465-supp3.xlsx]

## Sheet: E160307_all
Protein IDs	Majority protein IDs	Peptide counts (all)	Peptide counts (razor+unique)	Peptide counts (unique)	Fasta headers	Number of proteins	Peptides	Razor + unique peptides	Unique peptides	Peptides KS7611	Peptides KS8371	Razor + unique peptides KS7611	Razor + unique peptides KS8371	Unique peptides KS7611	Unique peptides KS8371	Sequence coverage [%]	Unique + razor sequence coverage [%]	Unique sequence coverage [%]	Mol. weight [kDa]	Sequence length	Sequence lengths	Q-value	Score	Identification type KS7611	Identification type KS8371	Sequence coverage KS7611 [%]	Sequence coverage KS8371 [%]	Intensity	Intensity KS7611	Intensity KS8371	LFQ intensity KS7611	LFQ intensity KS8371	MS/MS Count KS7611	MS/MS Count KS8371	MS/MS Count	Only identified by site	Reverse	Potential contaminant	id	Peptide IDs	Peptide is razor	Mod. peptide IDs	Evidence IDs	MS/MS IDs	Best MS/MS	Oxidation (M) site IDs	Oxidation (M) site positions
SPAC1002.03c|gls2|I|glucosidase	SPAC1002.03c|gls2|I|glucosidase	15	15	15	>SPAC1002.03c|gls2|I|glucosidase II alpha subunit Gls2	1	15	15	15	6	15	6	15	6	15	17.1	17.1	17.1	106.28	923	923	0	34.867	By MS/MS	By MS/MS	6	17.1	155770000	29434000	126330000	54982000	91186000	6	13	19				40	626;874;1011;2273;2458;2483;2934;3028;4061;4701;4702;5942;6144;6518;6606	True;True;True;True;True;True;True;True;True;True;True;True;True;True;True	651;914;1062;2382;2572;2598;3063;3163;3164;4249;4921;4922;6263;6481;6875;6964	1352;1883;1884;2167;2168;4704;5077;5135;5136;5137;5138;6154;6371;6372;6373;6374;8622;8623;9925;9926;9927;12932;12933;13424;14258;14434	1235;1736;1998;1999;4370;4707;4757;4758;4759;5699;5902;5903;5904;7963;7964;9169;9170;12153;12154;12616;13388;13544	1235;1736;1999;4370;4707;4759;5699;5903;7963;9169;9170;12153;12616;13388;13544	33	197
SPAC1002.09c|dld1|I|dihydrolipoamide	SPAC1002.09c|dld1|I|dihydrolipoamide	13	13	13	>SPAC1002.09c|dld1|I|dihydrolipoamide dehydrogenase Dld1	1	13	13	13	11	11	11	11	11	11	33.9	33.9	33.9	54.731	511	511	0	32.573	By MS/MS	By MS/MS	29.4	29.4	290950000	139190000	151760000	116100000	145910000	13	12	25				41	108;453;1734;2508;2749;3407;3895;5713;7818;8143;8336;8381;8596	True;True;True;True;True;True;True;True;True;True;True;True;True	114;473;1823;2624;2873;3555;4074;6026;8235;8578;8782;8783;8832;9060	238;1013;1014;1015;1016;1017;1018;3542;3543;5244;5751;5752;7152;7153;8225;8226;12462;12463;12464;17040;17793;17794;18197;18198;18199;18200;18302;18724;18725	210;935;936;937;938;939;3279;3280;3281;4874;5326;5327;6625;7609;7610;11723;11724;11725;15936;16636;17012;17013;17014;17015;17106;17491	210;939;3280;4874;5327;6625;7609;11725;15936;16636;17014;17106;17491	34;35;36	126;127;363
SPAC1002.12c|SPAC1002.12c|I|succinate-semialdehyde	SPAC1002.12c|SPAC1002.12c|I|succinate-semialdehyde	4	4	4	>SPAC1002.12c|SPAC1002.12c|I|succinate-semialdehyde dehydrogenase [NAD(P)+] (predicted)	1	4	4	4	3	3	3	3	3	3	9.3	9.3	9.3	58.833	547	547	0	5.4394	By MS/MS	By MS/MS	7.5	6.9	54108000	27845000	26263000	22258000	29977000	1	2	3				42	1120;4566;8091;9074	True;True;True;True	1175;4785;8524;9552	2382;9667;9668;17649;19778;19779	2194;8927;16491;18561	2194;8927;16491;18561
SPAC1002.17c|urg2|I|uracil	SPAC1002.17c|urg2|I|uracil	7	7	7	>SPAC1002.17c|urg2|I|uracil phosphoribosyltransferase (predicted)	1	7	7	7	7	4	7	4	7	4	43.6	43.6	43.6	22.083	204	204	0	36.725	By MS/MS	By MS/MS	43.6	25	151860000	91625000	60233000	69541000	76155000	7	2	9				43	2201;2854;5782;7177;7328;7411;8469	True;True;True;True;True;True;True	2309;2982;6097;7561;7719;7805;8926	4536;4537;5978;5979;12608;15642;15643;15949;15950;16127;18477	4201;5535;5536;11852;14649;14650;14919;15081;17262	4201;5535;11852;14650;14919;15081;17262
SPAC1002.18|urg3|I|DUF1688	SPAC1002.18|urg3|I|DUF1688	5	5	5	>SPAC1002.18|urg3|I|DUF1688 family protein	1	5	5	5	4	4	4	4	4	4	13.8	13.8	13.8	44.21	399	399	0	11.599	By MS/MS	By MS/MS	11	11.3	35697000	14756000	20941000	17510000	17195000	3	4	7				44	4735;5152;6334;6750;8923	True;True;True;True;True	4955;5392;6682;7121;9396	9984;9985;10802;10803;13825;13826;14756;19389	9223;9224;9968;12981;13837;18106;18107	9223;9968;12981;13837;18106
SPAC1002.19|urg1|I|GTP	SPAC1002.19|urg1|I|GTP	25	25	25	>SPAC1002.19|urg1|I|GTP cyclohydrolase II Urg1 (predicted)	1	25	25	25	23	20	23	20	23	20	67.7	67.7	67.7	49.034	439	439	0	106.82	By MS/MS	By MS/MS	62.9	56.3	1796100000	714260000	1081800000	635780000	1025500000	28	27	55				45	261;405;412;1328;1962;2149;3273;3274;3723;3815;3838;3839;3875;4115;4172;5563;6163;6920;7365;7554;7606;8129;8239;9163;9209	True;True;True;True;True;True;True;True;True;True;True;True;True;True;True;True;True;True;True;True;True;True;True;True;True	274;423;430;1399;2061;2253;2254;3415;3416;3417;3891;3989;4013;4014;4015;4016;4054;4306;4368;5841;6501;7297;7759;7954;8011;8564;8681;9647;9694	598;599;600;601;902;903;914;2787;4015;4016;4017;4018;4424;4425;4426;4427;6893;6894;6895;6896;6897;7846;7847;8063;8064;8065;8066;8112;8113;8114;8115;8116;8117;8118;8119;8187;8188;8739;8740;8868;8869;11803;11804;13462;13463;15110;15111;16045;16393;16525;17762;17763;17764;17765;17993;17994;17995;17996;19972;19973;20057;20058	553;554;555;556;831;832;842;2569;3728;3729;3730;3731;3732;3733;4103;4104;4105;4106;6395;6396;6397;6398;6399;7256;7257;7462;7463;7464;7465;7466;7467;7505;7506;7507;7508;7509;7571;8068;8175;8176;10932;12649;14155;15006;15323;15451;16608;16609;16610;16611;16823;16824;16825;16826;18745;18818	556;831;842;2569;3729;4103;6397;6399;7256;7464;7507;7508;7571;8068;8175;10932;12649;14155;15006;15323;15451;16610;16826;18745;18818	37;38;39	49;129;360
SPAC1006.01|psp3|I|vacuolar	SPAC1006.01|psp3|I|vacuolar	4	4	4	>SPAC1006.01|psp3|I|vacuolar serine protease Psp3 (predicted)	1	4	4	4	4	2	4	2	4	2	10.4	10.4	10.4	48.732	451	451	0	14.383	By MS/MS	By MS/MS	10.4	6.2	14020000	7106200	6913300	6655800	6885800	3	1	4				46	77;1101;2510;4511	True;True;True;True	78;1155;2626;4727	154;2345;2346;5246;9556;9557	133;2163;4876;8824	133;2163;4876;8824
SPAC1006.06|rgf2|I|RhoGEF	SPAC1006.06|rgf2|I|RhoGEF	1	1	1	>SPAC1006.06|rgf2|I|RhoGEF Rgf2	1	1	1	1	1	0	1	0	1	0	0.9	0.9	0.9	130.88	1158	1158	0.0030534	1.6492	By MS/MS	By matching	0.9	0	1510700	1510700	0	1409100	0	1	0	1				47	9247	TRUE	9735	20143	18903	18903
SPAC1006.07|SPAC1006.07|I|translation;SPAC1F5.10|SPAC1F5.10|I|ATP-dependent	SPAC1006.07|SPAC1006.07|I|translation	11;1	11;1	11;1	>SPAC1006.07|SPAC1006.07|I|translation initiation factor eIF4A (predicted)	2	11	11	11	9	8	9	8	9	8	33.7	33.7	33.7	44.436	392	392;394	0	35.955	By MS/MS	By MS/MS	30.4	25.8	232800000	102120000	130680000	95227000	124310000	6	9	15				48	329;1221;2507;2552;2805;3555;3962;4158;6201;6552;7506	True;True;True;True;True;True;True;True;True;True;True	344;345;1284;2623;2668;2932;3711;4141;4352;6544;6910;7903	731;732;733;2586;5242;5243;5338;5339;5879;7493;7494;8369;8837;13547;13548;14332;16304;16305	674;675;2381;4872;4873;4964;4965;5444;6934;6935;7734;8147;12724;12725;13452;15242;15243	674;2381;4873;4964;5444;6934;7734;8147;12725;13452;15243	40	51
SPAC1006.09|win1|I|MAP	SPAC1006.09|win1|I|MAP	9	9	9	>SPAC1006.09|win1|I|MAP kinase kinase kinase Win1	1	9	9	9	9	3	9	3	9	3	7.9	7.9	7.9	163.27	1436	1436	0	25.166	By MS/MS	By MS/MS	7.9	3	70579000	50719000	19860000	36615000	30553000	10	2	12				49	259;1353;1764;4278;4888;5198;5637;7075;8147	True;True;True;True;True;True;True;True;True	272;1425;1855;4478;5113;5439;5947;7456;8582	596;2839;3601;9080;9081;10268;10269;10890;12102;12103;15437;17803	551;2619;3338;8374;8375;9485;9486;9487;10052;11228;14456;16643	551;2619;3338;8375;9485;10052;11228;14456;16643
SPAC105.03c|SPAC105.03c|I|transcription	SPAC105.03c|SPAC105.03c|I|transcription	1	1	1	>SPAC105.03c|SPAC105.03c|I|transcription factor (predicted)	1	1	1	1	1	1	1	1	1	1	1.4	1.4	1.4	80.989	708	708	0	2.2348	By MS/MS	By MS/MS	1.4	1.4	6741700	3399100	3342600	0	3342600	1	1	2				50	3181	TRUE	3320	6710;6711	6223;6224	6224
SPAC1071.02|mms19|I|Dos2	SPAC1071.02|mms19|I|Dos2	1	1	1	>SPAC1071.02|mms19|I|Dos2 silencing complex subunit Mms19	1	1	1	1	0	1	0	1	0	1	1.6	1.6	1.6	114.67	1018	1018	0.0030441	1.6422	By matching	By MS/MS	0	1.6	4304500	0	4304500	0	4304500	0	0	0				51	4760	TRUE	4980	10028	9263	9263
SPCC1393.03|rps1501|III|40S;SPAC1071.07c|rps1502|I|40S	SPCC1393.03|rps1501|III|40S;SPAC1071.07c|rps1502|I|40S	2;2	2;2	2;2	>SPCC1393.03|rps1501|III|40S ribosomal protein S15 (predicted);>SPAC1071.07c|rps1502|I|40S ribosomal protein S15 (predicted)	2	2	2	2	2	1	2	1	2	1	26.8	26.8	26.8	17.519	153	153;154	0	78.723	By MS/MS	By MS/MS	26.8	14.4	200170000	63515000	136660000	48676000	147220000	3	2	5				52	2772;5895	True;True	2898;6211	5813;5814;5815;5816;12828	5381;5382;5383;5384;12056	5381;12056
SPAC1071.10c|pma1|I|P-type;SPCC1020.01c|pma2|III|P-type	SPAC1071.10c|pma1|I|P-type	30;8	30;8	30;8	>SPAC1071.10c|pma1|I|P-type proton ATPase, P3-type Pma1	2	30	30	30	30	27	30	27	30	27	35.8	35.8	35.8	99.883	919	919;1010	0	220.62	By MS/MS	By MS/MS	35.8	34.2	3519000000	1793200000	1725800000	1536700000	1731900000	44	39	83				53	756;1368;1440;2363;2396;2450;2560;2561;2852;2853;3163;3941;3999;4171;4539;5158;5564;5626;6333;6529;6639;6912;7988;7989;8266;8331;8690;9002;9083;9084	True;True;True;True;True;True;True;True;True;True;True;True;True;True;True;True;True;True;True;True;True;True;True;True;True;True;True;True;True;True	791;792;1441;1519;2474;2509;2564;2676;2677;2979;2980;2981;3302;4120;4182;4367;4756;4757;5398;5842;5843;5933;5934;6680;6681;6886;6999;7289;8417;8418;8708;8777;9155;9477;9562;9563;9564	1633;1634;1635;2859;2860;2989;2990;2991;2992;4871;4872;4945;4946;5060;5061;5349;5350;5351;5352;5970;5971;5972;5973;5974;5975;5976;5977;6677;6678;6679;6680;8325;8326;8460;8461;8865;8866;8867;9614;9615;9616;10815;10816;10817;10818;11805;11806;11807;12077;12078;12079;12080;13822;13823;13824;14280;14281;14507;14508;14509;14510;15096;15097;15098;15099;17424;17425;17426;17427;17428;17429;17430;18043;18…	1497;1498;1499;1500;1501;2638;2639;2766;2767;2768;2769;4513;4514;4589;4590;4692;4693;4975;4976;4977;4978;5529;5530;5531;5532;5533;5534;6192;6193;6194;7700;7701;7816;8173;8174;8877;8878;8879;9978;9979;9980;9981;9982;10933;10934;10935;11208;11209;11210;12978;12979;12980;13408;13603;13604;13605;13606;14141;14142;14143;14144;16280;16281;16282;16283;16284;16285;16286;16287;16870;17001;17002;17003;1700…	1498;2639;2769;4513;4589;4693;4975;4977;5531;5534;6193;7700;7816;8173;8879;9980;10935;11209;12979;13408;13604;14141;16281;16283;16870;17003;17667;18252;18583;18586	41;42;43;44;45;46;47;48	82;103;256;554;572;590;629;686
SPAC1093.01|ppr5|I|mitochondrial	SPAC1093.01|ppr5|I|mitochondrial	1	1	1	>SPAC1093.01|ppr5|I|mitochondrial PPR repeat protein Ppr5	1	1	1	1	1	0	1	0	1	0	0.6	0.6	0.6	141.95	1261	1261	0.009702	1.0214	By MS/MS	By matching	0.6	0	2452200	2452200	0	2287200	0	1	0	1				54	9166	TRUE	9650	19977	18748	18748
SPAC10F6.01c|sir1|I|sulfite	SPAC10F6.01c|sir1|I|sulfite	30	30	30	>SPAC10F6.01c|sir1|I|sulfite reductase beta subunit Sir1	1	30	30	30	29	23	29	23	29	23	27.1	27.1	27.1	163.84	1473	1473	0	151.43	By MS/MS	By MS/MS	27	22.3	493860000	261420000	232450000	214520000	261760000	25	20	45				55	58;151;320;413;1159;1347;1414;1485;2343;3312;4368;4643;4644;5012;5259;5315;6257;6297;6304;6443;6570;6880;7793;8086;8092;8187;8483;8574;8983;9152	True;True;True;True;True;True;True;True;True;True;True;True;True;True;True;True;True;True;True;True;True;True;True;True;True;True;True;True;True;True	59;160;335;431;1220;1418;1489;1566;2453;3456;4576;4863;4864;5247;5501;5558;6602;6643;6650;6797;6928;7254;8208;8519;8525;8627;8940;9036;9458;9636	123;124;387;388;714;715;915;916;2470;2471;2820;2936;3093;3094;4830;6968;6969;9250;9814;9815;9816;9817;10532;10533;11006;11007;11119;11120;13653;13654;13741;13742;13761;14061;14062;14364;14365;15021;15022;16989;16990;17639;17640;17650;17892;18500;18501;18681;18682;19522;19523;19952	107;357;358;658;659;843;844;845;2277;2278;2602;2715;2865;2866;4478;6462;6463;8534;9062;9063;9064;9065;9066;9728;9729;10156;10157;10259;10260;12823;12901;12920;13200;13201;13479;13480;14077;14078;15891;15892;16483;16492;16728;17283;17284;17450;18220;18221;18728	107;358;659;844;2278;2602;2715;2866;4478;6462;8534;9063;9065;9728;10157;10260;12823;12901;12920;13201;13480;14077;15892;16483;16492;16728;17284;17450;18221;18728	49	959
SPAC10F6.03c|cts1|I|CTP	SPAC10F6.03c|cts1|I|CTP	12	12	12	>SPAC10F6.03c|cts1|I|CTP synthase Cts1 (predicted)	1	12	12	12	12	10	12	10	12	10	24.8	24.8	24.8	66.867	600	600	0	33.734	By MS/MS	By MS/MS	24.8	20.8	257010000	132550000	124470000	108080000	140020000	9	9	18				56	784;2780;3040;3041;3091;4537;5612;8013;8708;9189;9298;9331	True;True;True;True;True;True;True;True;True;True;True;True	821;2906;3176;3177;3228;4754;5912;8445;9173;9674;9787;9821	1688;1689;5830;5831;6396;6397;6398;6399;6531;6532;9610;9611;12038;17483;17484;18953;18954;20022;20259;20260;20335;20336	1551;1552;5398;5399;5923;5924;5925;5926;6056;8873;8874;11172;16338;16339;17703;17704;18786;19016;19017;19097	1552;5399;5923;5926;6056;8874;11172;16339;17704;18786;19016;19097
SPAC10F6.06|vip1|I|RNA-binding	SPAC10F6.06|vip1|I|RNA-binding	9	9	9	>SPAC10F6.06|vip1|I|RNA-binding protein Vip1	1	9	9	9	9	6	9	6	9	6	48.2	48.2	48.2	27.459	257	257	0	24.814	By MS/MS	By MS/MS	48.2	26.1	131350000	68102000	63247000	54085000	72684000	8	3	11				57	2523;2843;3703;5951;5960;6662;7130;7492;7932	True;True;True;True;True;True;True;True;True	2639;2970;3870;6272;6282;7022;7512;7889;8357	5273;5274;5953;5954;7798;7799;12953;12976;14549;14550;15551;16283;16284;17306;17307	4900;4901;5515;7214;12175;12195;13638;13639;14559;15223;16170	4901;5515;7214;12175;12195;13639;14559;15223;16170
SPAC10F6.09c|psm3|I|mitotic	SPAC10F6.09c|psm3|I|mitotic	5	5	5	>SPAC10F6.09c|psm3|I|mitotic cohesin complex subunit Psm3/Smc3	1	5	5	5	5	2	5	2	5	2	5.4	5.4	5.4	136.85	1194	1194	0	9.846	By MS/MS	By MS/MS	5.4	2.2	94444000	80256000	14188000	66245000	22801000	3	1	4				58	116;793;2292;3620;3752	True;True;True;True;True	123;830;2401;3782;3924	252;1705;4734;4735;7624;7625;7945	223;1566;4397;7051;7052;7355	223;1566;4397;7052;7355
SPAC10F6.13c|caa1|I|cytoplasmic	SPAC10F6.13c|caa1|I|cytoplasmic	8	8	8	>SPAC10F6.13c|caa1|I|cytoplasmic aspartate aminotransferase Caa1 (predicted)	1	8	8	8	8	6	8	6	8	6	32.5	32.5	32.5	46.14	409	409	0	51.498	By MS/MS	By MS/MS	32.5	26.4	199900000	91804000	108090000	79085000	96860000	7	9	16				59	2;916;1209;3114;3174;3779;3846;6016	True;True;True;True;True;True;True;True	2;962;1272;3251;3313;3952;3953;4024;6343	4;5;6;7;1974;2562;2563;6579;6580;6697;6698;6699;7996;7997;7998;7999;8130;8131;13109	3;4;5;1818;2361;2362;6097;6098;6099;6210;6211;6212;7403;7404;7405;7406;7519;7520;12314	3;1818;2361;6099;6211;7406;7519;12314	50	386
SPAC10F6.17c|SPAC10F6.17c|I|mitochondrial	SPAC10F6.17c|SPAC10F6.17c|I|mitochondrial	2	2	2	>SPAC10F6.17c|SPAC10F6.17c|I|mitochondrial pyruvate dehydrogenase (lipoamide) phosphatase (predicted)	1	2	2	2	2	1	2	1	2	1	4.7	4.7	4.7	49.74	444	444	0	2.6677	By MS/MS	By MS/MS	4.7	2	8499200	6260900	2238300	5839800	0	2	1	3				60	4415;6269	True;True	4624;6614	9321;13681;13682	8601;12848;12849	8601;12848
SPAC110.03|cdc42|I|Rho	SPAC110.03|cdc42|I|Rho	4	4	4	>SPAC110.03|cdc42|I|Rho family GTPase Cdc42	1	4	4	4	4	4	4	4	4	4	21.9	21.9	21.9	21.329	192	192	0	4.6184	By MS/MS	By MS/MS	21.9	21.9	47197000	23305000	23892000	21654000	23976000	4	1	5				61	6047;6048;6270;9318	True;True;True;True	6374;6375;6615;9807	13166;13167;13168;13169;13170;13683;13684;20302;20303	12362;12363;12364;12365;12366;12850;19054	12363;12365;12850;19054
SPAC110.04c|pss1|I|heat	SPAC110.04c|pss1|I|heat	36	36	36	>SPAC110.04c|pss1|I|heat shock protein Pss1	1	36	36	36	35	26	35	26	35	26	57.6	57.6	57.6	80.374	720	720	0	193.9	By MS/MS	By MS/MS	57.6	42.9	1322400000	771010000	551350000	635440000	565080000	40	26	66				62	111;277;289;362;394;395;430;431;443;573;1354;1752;2049;2372;2611;4080;4301;4330;4945;5267;5322;5647;6385;6386;6505;6608;6647;6711;7534;7832;8041;8072;8101;8628;9151;9162	True;True;True;True;True;True;True;True;True;True;True;True;True;True;True;True;True;True;True;True;True;True;True;True;True;True;True;True;True;True;True;True;True;True;True;True	117;291;303;379;412;413;448;449;463;596;1426;1843;2149;2484;2728;4271;4505;4535;5174;5175;5509;5565;5957;6737;6738;6861;6966;7007;7075;7933;8249;8473;8504;8535;9092;9635;9646	242;243;636;637;654;655;808;809;873;874;875;876;877;953;954;955;956;988;989;990;991;1242;2840;3582;3583;4228;4229;4230;4231;4232;4888;4889;5459;5460;8664;9138;9189;10394;10395;10396;10397;10398;10399;10400;10401;11023;11024;11134;12290;12291;13945;13946;13947;13948;13949;14226;14227;14436;14437;14527;14659;14660;14661;14662;16362;17069;17070;17540;17541;17611;17612;17674;17675;18788;18789;18790;1…	214;215;585;586;602;743;803;804;805;806;807;877;878;879;880;911;912;913;914;1140;2620;3320;3931;3932;3933;3934;4529;4530;5071;8004;8429;8473;9603;9604;9605;9606;9607;9608;9609;9610;10172;10272;11568;13097;13098;13099;13100;13101;13358;13359;13546;13547;13619;13742;13743;13744;13745;15293;15960;15961;16388;16389;16454;16455;16513;16514;17553;17554;18725;18726;18727;18743;18744	214;585;602;743;804;807;877;879;911;1140;2620;3320;3934;4530;5071;8004;8429;8473;9610;10172;10272;11568;13100;13101;13359;13546;13619;13744;15293;15960;16388;16455;16514;17553;18725;18744	51	175
SPAC1142.06|get3|I|GET	SPAC1142.06|get3|I|GET	3	3	3	>SPAC1142.06|get3|I|GET complex ATPase subunit Get3 (predicted)	1	3	3	3	3	2	3	2	3	2	15.2	15.2	15.2	36.548	329	329	0	9.2762	By MS/MS	By MS/MS	15.2	8.8	31392000	21783000	9608900	12132000	17794000	3	2	5				63	2063;6782;7287	True;True;True	2163;7153;7677	4258;4259;14815;14816;15867	3956;3957;13892;13893;14848	3956;13892;14848
SPAC11D3.15|SPAC11D3.15|I|5-oxoprolinase	SPAC11D3.15|SPAC11D3.15|I|5-oxoprolinase	4	4	4	>SPAC11D3.15|SPAC11D3.15|I|5-oxoprolinase (ATP-hydrolizing) (predicted)	1	4	4	4	3	3	3	3	3	3	4.3	4.3	4.3	143.72	1317	1317	0	8.7025	By MS/MS	By MS/MS	3.4	3	22558000	11602000	10956000	11049000	10728000	4	3	7				64	3336;3689;5305;7017	True;True;True;True	3481;3855;5548;7396	7015;7769;7770;11097;11098;15326	6506;7186;7187;7188;10237;10238;14357	6506;7186;10237;14357
SPAC11E3.01c|swr1|I|SNF2	SPAC11E3.01c|swr1|I|SNF2	1	1	1	>SPAC11E3.01c|swr1|I|SNF2 family ATP-dependent DNA helicase Swr1	1	1	1	1	1	0	1	0	1	0	0.5	0.5	0.5	149.45	1288	1288	0	3.8522	By MS/MS	By matching	0.5	0	15613000	15613000	0	14563000	0	1	0	1				65	4363	TRUE	4570	9243	8527	8527
SPAC11E3.07|vma4|I|V-type	SPAC11E3.07|vma4|I|V-type	4	4	4	>SPAC11E3.07|vma4|I|V-type ATPase V1 subunit E (predicted)	1	4	4	4	3	1	3	1	3	1	19.8	19.8	19.8	25.741	227	227	0	11.143	By MS/MS	By MS/MS	13.2	6.6	33247000	30368000	2878700	28326000	0	1	1	2				66	617;4779;7066;8325	True;True;True;True	642;5000;7447;8771	1335;10063;15424;18174	1219;9295;14444;16989	1219;9295;14444;16989
SPAC11E3.14|SPAC11E3.14|I|conserved	SPAC11E3.14|SPAC11E3.14|I|conserved	3	3	3	>SPAC11E3.14|SPAC11E3.14|I|conserved eukaryotic protein	1	3	3	3	3	3	3	3	3	3	4.9	4.9	4.9	67.09	588	588	0	5.4654	By MS/MS	By MS/MS	4.9	4.9	16294000	8327600	7966900	7957500	7776900	2	2	4				67	1692;3590;7776	True;True;True	1780;3748;8190	3471;3472;7562;7563;16935;16936	3216;3217;6995;6996;15831	3217;6995;15831
SPAC11E3.15|rpl22|I|60S	SPAC11E3.15|rpl22|I|60S	1	1	1	>SPAC11E3.15|rpl22|I|60S ribosomal protein L22 (predicted)	1	1	1	1	1	1	1	1	1	1	6.8	6.8	6.8	13.32	117	117	0.005891	1.4243	By matching	By MS/MS	6.8	6.8	4884400	1200500	3683800	0	3683800	0	1	1				68	3102	TRUE	3239	6554;6555	6075	6075
SPAC11G7.02|pub1|I|HECT-type	SPAC11G7.02|pub1|I|HECT-type	2	2	2	>SPAC11G7.02|pub1|I|HECT-type ubiquitin-protein ligase E3 Pub1	1	2	2	2	1	1	1	1	1	1	2.7	2.7	2.7	87.267	767	767	0	3.5628	By MS/MS	By MS/MS	1.4	1.3	5183900	1472100	3711800	0	3711800	1	1	2				69	2694;4867	True;True	2814;5092	5632;10230	5219;9452	5219;9452
SPAC11G7.03|idh1|I|isocitrate	SPAC11G7.03|idh1|I|isocitrate	11	11	11	>SPAC11G7.03|idh1|I|isocitrate dehydrogenase (NAD+) subunit 1 Idh1	1	11	11	11	9	9	9	9	9	9	37.1	37.1	37.1	38.758	356	356	0	46.858	By MS/MS	By MS/MS	31.5	34.3	284950000	158040000	126920000	143750000	126520000	6	8	14				70	1073;1271;1638;1728;2451;2525;2899;4216;7497;7901;9311	True;True;True;True;True;True;True;True;True;True;True	1126;1338;1726;1817;2565;2641;3028;4414;7894;8323;9800	2289;2290;2676;3383;3384;3533;3534;5062;5063;5276;5277;6084;8962;8963;16290;17248;20286;20287;20288	2113;2114;2466;3135;3136;3272;4694;4695;4903;4904;5635;8261;8262;15228;16116;19040;19041	2113;2466;3135;3272;4695;4904;5635;8261;15228;16116;19041
SPAC1805.12c|uep1|I|ribosomal-ubiquitin;SPAC11G7.04|ubi1|I|ribosomal-ubiquitin;SPAC6G10.11c|ubi3|I|ribosomal-ubiquitin;SPAC589.10c|ubi5|I|ribosomal-ubiquitin;SPBC337.08c|ubi4|II|ubiquitin	SPAC1805.12c|uep1|I|ribosomal-ubiquitin;SPAC11G7.04|ubi1|I|ribosomal-ubiquitin;SPAC6G10.11c|ubi3|I|ribosomal-ubiquitin;SPAC589.10c|ubi5|I|ribosomal-ubiquitin;SPBC337.08c|ubi4|II|ubiquitin	4;4;4;4;4	4;4;4;4;4	4;4;4;4;4	>SPAC1805.12c|uep1|I|ribosomal-ubiquitin fusion protein Ubi2;>SPAC11G7.04|ubi1|I|ribosomal-ubiquitin fusion protein Ubi1 (predicted);>SPAC6G10.11c|ubi3|I|ribosomal-ubiquitin fusion protein Ubi3 (predicted);>SPAC589.10c|ubi5|I|ribosomal-ubiquitin fusion pro	5	4	4	4	4	2	4	2	4	2	36.7	36.7	36.7	14.595	128	128;128;150;150;382	0	50.319	By MS/MS	By MS/MS	36.7	14.1	856730000	439090000	417640000	409560000	0	7	2	9				71	1707;3695;7705;7784	True;True;True;True	1796;3861;8116;8198	3494;3495;3496;3497;3498;7781;16766;16767;16950;16951	3236;3237;3238;3239;7199;15670;15671;15672;15673;15674;15844;15845	3238;7199;15671;15845
SPAC11H11.06|arp2|I|ARP2/3	SPAC11H11.06|arp2|I|ARP2/3	4	4	4	>SPAC11H11.06|arp2|I|ARP2/3 actin-organizing complex subunit Arp2	1	4	4	4	4	3	4	3	4	3	9	9	9	44.23	390	390	0	12.254	By MS/MS	By MS/MS	9	9	100700000	50493000	50208000	35391000	44602000	4	3	7				72	2155;2156;3561;9181	True;True;True;True	2260;2261;3717;3718;9665	4442;4443;4444;7504;7505;7506;7507;20003;20004	4119;4120;4121;6943;6944;6945;18770;18771	4119;4121;6944;18770	52	110
SPAC12B10.01c|SPAC12B10.01c|I|HECT-type	SPAC12B10.01c|SPAC12B10.01c|I|HECT-type	3	3	3	>SPAC12B10.01c|SPAC12B10.01c|I|HECT-type ubiquitin-protein ligase E3 (predicted)	1	3	3	3	2	2	2	2	2	2	1.9	1.9	1.9	185.61	1647	1647	0	4.2388	By MS/MS	By MS/MS	1.4	1	16495000	9443800	7051600	0	7051600	1	2	3				73	2111;5696;7406	True;True;True	2213;6009;7800	4350;4351;12427;16116	4039;4040;11691;15069	4040;11691;15069
SPAC12B10.03|bun62|I|WD	SPAC12B10.03|bun62|I|WD	6	6	6	>SPAC12B10.03|bun62|I|WD repeat protein, human WDR20 family, Bun62	1	6	6	6	4	6	4	6	4	6	12.9	12.9	12.9	61.81	543	543	0	14.561	By MS/MS	By MS/MS	9	12.9	39708000	20731000	18977000	21808000	16506000	4	5	9				74	1200;2913;6161;6798;7338;7597	True;True;True;True;True;True	1262;3042;6499;7169;7730;8002	2545;2546;6115;13459;13460;14846;14847;15977;15978;16505	2345;2346;5665;12646;12647;13920;13921;14944;15432	2345;5665;12647;13921;14944;15432
SPAC12B10.14c|tea5|I|pseudokinase	SPAC12B10.14c|tea5|I|pseudokinase	2	2	2	>SPAC12B10.14c|tea5|I|pseudokinase Tea5	1	2	2	2	0	2	0	2	0	2	3.5	3.5	3.5	74.525	665	665	0	2.4435	By matching	By MS/MS	0	3.5	3244600	0	3244600	0	3244600	0	1	1				75	2371;7172	True;True	2483;7556	4887;15635	4528;14642	4528;14642
SPAC12G12.04|mcp60|I|mitochondrial	SPAC12G12.04|mcp60|I|mitochondrial	22	22	22	>SPAC12G12.04|mcp60|I|mitochondrial heat shock protein Hsp60/Mcp60	1	22	22	22	21	20	21	20	21	20	43.8	43.8	43.8	62.167	582	582	0	85.091	By MS/MS	By MS/MS	43.3	38.1	1116400000	529410000	586990000	425740000	655060000	21	20	41				76	57;301;341;645;767;1181;1405;2270;2700;2848;3840;4169;4498;4563;5183;6059;6589;7195;7699;7813;8191;8639	True;True;True;True;True;True;True;True;True;True;True;True;True;True;True;True;True;True;True;True;True;True	58;315;357;670;804;1243;1479;2379;2820;2975;4017;4365;4713;4782;5424;6387;6947;7579;8110;8230;8631;9103	119;120;121;122;676;677;756;757;1384;1385;1656;1657;2518;2519;2920;2921;4699;4700;5644;5645;5963;5964;8120;8121;8861;8862;9530;9531;9661;9662;10863;10864;13196;13197;14400;14401;15675;16751;17031;17897;17898;18809;18810;18811;18812	104;105;106;624;697;698;1264;1265;1522;1523;2323;2324;2699;2700;4365;4366;5227;5228;5522;5523;7510;7511;8169;8170;8797;8921;8922;10031;10032;12392;12393;13511;13512;13513;14676;15658;15928;16732;16733;17571;17572;17573;17574	104;624;698;1265;1523;2323;2700;4365;5227;5523;7511;8170;8797;8922;10031;12392;13512;14676;15658;15928;16732;17572	53	224
SPAC12G12.09|eti1|I|conserved	SPAC12G12.09|eti1|I|conserved	1	1	1	>SPAC12G12.09|eti1|I|conserved fungal protein associated with stress granule	1	1	1	1	1	0	1	0	1	0	1.2	1.2	1.2	109.71	977	977	0.0092725	1.2218	By MS/MS	By matching	1.2	0	2507500	2507500	0	2338800	0	0	0	0				77	5989	TRUE	6315	13052	12268	12268
SPAC12G12.12|gms2|I|UDP-galactose	SPAC12G12.12|gms2|I|UDP-galactose	1	1	1	>SPAC12G12.12|gms2|I|UDP-galactose transmembrane transporter Gms2 (predicted)	1	1	1	1	1	1	1	1	1	1	2.2	2.2	2.2	35.746	324	324	0.0015444	1.7197	By MS/MS	By MS/MS	2.2	2.2	5879000	3462500	2416500	0	2416500	1	1	2				78	7035	TRUE	7414	15359;15360	14388;14389	14388
SPAC1327.01c|SPAC1327.01c|I|transcription	SPAC1327.01c|SPAC1327.01c|I|transcription	4	4	4	>SPAC1327.01c|SPAC1327.01c|I|transcription factor, zf-fungal binuclear cluster type (predicted)	1	4	4	4	3	3	3	3	3	3	5.7	5.7	5.7	107.81	977	977	0	10.104	By MS/MS	By MS/MS	3.4	4.5	33304000	11890000	21414000	10198000	22306000	3	3	6				79	3444;4375;6000;6038	True;True;True;True	3596;4583;6326;6365	7243;7244;9262;13073;13074;13153	6705;6706;8543;12287;12288;12350	6705;8543;12287;12350
SPAC139.01c|ath2|I|Ath1	SPAC139.01c|ath2|I|Ath1	1	1	1	>SPAC139.01c|ath2|I|Ath1 complex protein Ath2 nuclease, XP-G family (predicted)	1	1	1	1	1	1	1	1	1	1	1.9	1.9	1.9	90.152	802	802	0.00079808	2.0487	By matching	By MS/MS	1.9	1.9	3195700	1414700	1780900	0	1780900	0	1	1				80	1044	TRUE	1097	2230;2231	2057	2057
SPAC139.04c|fap2|I|L-saccharopine	SPAC139.04c|fap2|I|L-saccharopine	2	2	2	>SPAC139.04c|fap2|I|L-saccharopine oxidase	1	2	2	2	2	2	2	2	2	2	5.5	5.5	5.5	48.973	433	433	0	4.7324	By MS/MS	By MS/MS	5.5	5.5	10360000	5978200	4382100	5745200	4213100	1	1	2				81	1549;3533	True;True	1633;3688	3217;3218;7453;7454	2980;6898;6899	2980;6898
SPAC1399.01c|SPAC1399.01c|I|transmembrane	SPAC1399.01c|SPAC1399.01c|I|transmembrane	1	1	1	>SPAC1399.01c|SPAC1399.01c|I|transmembrane transporter (predicted)	1	1	1	1	1	1	1	1	1	1	1.3	1.3	1.3	64.571	601	601	0.00079365	2.0099	By MS/MS	By MS/MS	1.3	1.3	8679700	4270700	4409000	0	4409000	1	1	2				82	2293	TRUE	2402	4736;4737	4398;4399	4399
SPAC13A11.01c|rga8|I|Rho-type	SPAC13A11.01c|rga8|I|Rho-type	4	4	4	>SPAC13A11.01c|rga8|I|Rho-type GTPase activating protein Rga8	1	4	4	4	4	2	4	2	4	2	6.6	6.6	6.6	88.207	777	777	0	13.672	By MS/MS	By MS/MS	6.6	3.1	24115000	17499000	6615400	16322000	0	3	0	3				83	1067;4875;8539;9131	True;True;True;True	1120;5100;9001;9614	2275;10245;10246;18617;19911;19912	2098;9466;17391;18687;18688	2098;9466;17391;18688
SPAC13A11.02c|erg11|I|sterol	SPAC13A11.02c|erg11|I|sterol	7	7	7	>SPAC13A11.02c|erg11|I|sterol 14-demethylase Erg11 (predicted)	1	7	7	7	7	6	7	6	7	6	18.8	18.8	18.8	56.331	495	495	0	25.149	By MS/MS	By MS/MS	18.8	17	173160000	89471000	83687000	76431000	90709000	6	3	9				84	1444;2340;4217;4579;6860;7461;8761	True;True;True;True;True;True;True	1524;2450;4415;4798;7234;7856;9228	3001;3002;4823;4824;8964;8965;9698;9699;14979;14980;16211;16212;19059	2776;4473;8263;8264;8955;8956;14042;14043;15155;17803	2776;4473;8263;8955;14042;15155;17803
SPAC13A11.05|ysp2|I|peptidase	SPAC13A11.05|ysp2|I|peptidase	3	3	3	>SPAC13A11.05|ysp2|I|peptidase family M17 cytoplasmic leucyl aminopeptidase yspII (LAP yspII)	1	3	3	3	3	1	3	1	3	1	6.2	6.2	6.2	56.194	513	513	0	7.2553	By MS/MS	By matching	6.2	2.5	13815000	10165000	3649900	9481600	0	2	0	2				85	2047;4484;8285	True;True;True	2147;4698;8729	4225;9497;18078;18079	3929;8769;16901	3929;8769;16901
SPCC1494.11c|Tf2-13|III|retrotransposable;SPBC1E8.04|Tf2-10|II|retrotransposable;SPCC1020.14|Tf2-12|III|retrotransposable;SPBC9B6.02c|Tf2-9|II|retrotransposable;SPBC1289.17|Tf2-11|II|retrotransposable;SPAPB15E9.03c|Tf2-5|I|retrotransposable;SPAC9.04|Tf2-1|I|retrotransposable;SPAC2E1P3.03c|Tf2-3|I|retrotransposable;SPAC27E2.08|Tf2-6|I|retrotransposable;SPAC26A3.13c|Tf2-4|I|retrotransposable;SPAC19…	SPCC1494.11c|Tf2-13|III|retrotransposable;SPBC1E8.04|Tf2-10|II|retrotransposable;SPCC1020.14|Tf2-12|III|retrotransposable;SPBC9B6.02c|Tf2-9|II|retrotransposable;SPBC1289.17|Tf2-11|II|retrotransposable;SPAPB15E9.03c|Tf2-5|I|retrotransposable;SPAC9.04|Tf2-1|I|retrotransposable;SPAC2E1P3.03c|Tf2-3|I|retrotransposable;SPAC27E2.08|Tf2-6|I|retrotransposable;SPAC26A3.13c|Tf2-4|I|retrotransposable;SPAC19…	6;6;6;6;6;6;6;6;6;6;6;6;6	6;6;6;6;6;6;6;6;6;6;6;6;6	6;6;6;6;6;6;6;6;6;6;6;6;6	>SPCC1494.11c|Tf2-13|III|retrotransposable element/transposon Tf2-type;>SPBC1E8.04|Tf2-10|II|retrotransposable element/transposon Tf2-type;>SPCC1020.14|Tf2-12|III|retrotransposable element/transposon Tf2-type;>SPBC9B6.02c|Tf2-9|II|retrotransposable element	13	6	6	6	6	3	6	3	6	3	5.6	5.6	5.6	154.8	1332	1332;1332;1333;1333;1333;1333;1333;1333;1333;1333;1333;1333;1333	0	15.684	By MS/MS	By MS/MS	5.6	2.9	45099000	31620000	13479000	23914000	19059000	4	1	5				86	1670;2199;4283;4635;4984;6234	True;True;True;True;True;True	1758;2307;4484;4855;5217;6577	3437;4533;4534;9089;9090;9798;10471;13608;13609	3183;4198;4199;8382;9050;9670;12782	3183;4198;8382;9050;9670;12782
SPAC13F5.03c|gld1|I|mitochondrial	SPAC13F5.03c|gld1|I|mitochondrial	6	6	6	>SPAC13F5.03c|gld1|I|mitochondrial glycerol dehydrogenase Gld1	1	6	6	6	6	5	6	5	6	5	17.3	17.3	17.3	49.433	450	450	0	17.768	By MS/MS	By MS/MS	17.3	14.9	64597000	33158000	31439000	31480000	30887000	5	3	8				87	692;3107;5351;7135;8301;8986	True;True;True;True;True;True	721;3244;5594;7517;8747;9461	1494;1495;6565;6566;11189;11190;15560;15561;18121;19527;19528	1369;6086;10325;10326;14567;16942;18225;18226	1369;6086;10325;14567;16942;18225
SPAC13F5.06c|sec10|I|exocyst	SPAC13F5.06c|sec10|I|exocyst	14	14	14	>SPAC13F5.06c|sec10|I|exocyst complex subunit Sec10	1	14	14	14	13	6	13	6	13	6	17.8	17.8	17.8	92.515	811	811	0	34.471	By MS/MS	By MS/MS	16.5	8.3	88427000	54900000	33528000	39664000	45071000	9	4	13				88	1413;1588;2536;3595;3733;4077;4414;4550;5145;6858;6862;7556;7783;8245	True;True;True;True;True;True;True;True;True;True;True;True;True;True	1488;1673;2652;3753;3902;4267;4623;4769;5385;7232;7236;7956;8197;8687	2934;2935;3284;5299;7570;7571;7873;7874;8657;9320;9635;9636;10790;14976;14982;16395;16948;16949;18004	2713;2714;3039;4925;7002;7003;7281;7282;7997;8600;8896;8897;9959;14039;14045;15325;15842;15843;16834	2714;3039;4925;7003;7281;7997;8600;8896;9959;14039;14045;15325;15843;16834
SPAC13G6.02c|rps101|I|40S	SPAC13G6.02c|rps101|I|40S	7	3	3	>SPAC13G6.02c|rps101|I|40S ribosomal protein S3a	1	7	3	3	7	5	3	2	3	2	26.2	17.1	17.1	28.488	252	252	0	10.419	By MS/MS	By MS/MS	26.2	19	36172000	19877000	16295000	16557000	18278000	2	2	4				89	551;695;3527;3530;4670;8370;8746	False;True;False;True;False;True;False	572;724;3682;3685;4890;8821;9212	1198;1199;1500;1501;7437;7438;7439;7440;7447;7448;9867;9868;18282;19030	1099;1100;1374;1375;6884;6885;6886;6887;6893;9118;9119;17089;17775	1099;1375;6885;6893;9118;17089;17775
SPAC13G6.03|gpi7|I|GPI	SPAC13G6.03|gpi7|I|GPI	1	1	1	>SPAC13G6.03|gpi7|I|GPI anchor biosynthesis protein Gpi7 (predicted)	1	1	1	1	1	1	1	1	1	1	1.3	1.3	1.3	85.645	758	758	0	2.7541	By MS/MS	By MS/MS	1.3	1.3	6916600	3433600	3483000	0	3483000	0	1	1				90	4769	TRUE	4989	10044;10045	9278;9279	9278
SPAC13G6.04|tim8|I|TIM22	SPAC13G6.04|tim8|I|TIM22	2	2	2	>SPAC13G6.04|tim8|I|TIM22 inner membrane protein import complex subunit Tim8 (predicted)	1	2	2	2	2	1	2	1	2	1	29.9	29.9	29.9	9.9873	87	87	0	8.3027	By MS/MS	By MS/MS	29.9	11.5	21532000	13036000	8495800	12159000	0	2	1	3				91	2023;5932	True;True	2123;6253	4181;4182;12916	3887;3888;12136	3888;12136
SPAC13G6.06c|gcv2|I|glycine	SPAC13G6.06c|gcv2|I|glycine	43	43	43	>SPAC13G6.06c|gcv2|I|glycine cleavage complex subunit P (predicted)	1	43	43	43	40	40	40	40	40	40	50.2	50.2	50.2	114.23	1031	1031	0	323.31	By MS/MS	By MS/MS	49.5	49.4	2756900000	979360000	1777500000	906660000	1686400000	36	47	83				92	31;205;381;779;933;1119;1155;1184;1242;1951;2119;2317;2868;3010;3308;3919;3987;4150;4198;4954;5028;5569;5770;5810;5908;5941;5998;6058;6668;6795;6806;6888;6889;7155;7536;7537;7538;7589;7843;7968;8159;9104;9127	True;True;True;True;True;True;True;True;True;True;True;True;True;True;True;True;True;True;True;True;True;True;True;True;True;True;True;True;True;True;True;True;True;True;True;True;True;True;True;True;True;True;True	31;217;398;816;981;1173;1174;1216;1246;1308;2049;2221;2426;2997;3145;3452;4098;4170;4343;4396;5186;5187;5265;5849;5850;6085;6125;6227;6262;6324;6386;7029;7166;7177;7178;7263;7264;7537;7935;7936;7937;7991;8262;8263;8396;8596;9587;9610	66;67;489;490;491;492;845;846;1678;1679;2007;2008;2378;2379;2380;2381;2460;2461;2462;2463;2523;2623;3982;3983;4365;4366;4782;4783;6013;6334;6335;6336;6957;6958;6959;6960;8281;8282;8434;8435;8813;8814;8927;8928;10418;10419;10420;10563;10564;11814;11815;11816;12587;12588;12655;12656;12860;12861;12862;12930;12931;13069;13070;13193;13194;13195;14565;14566;14841;14842;14861;14862;14863;14864;15040;150…	57;58;454;455;456;457;778;779;1542;1543;1848;1849;2191;2192;2193;2267;2268;2269;2270;2328;2416;3701;3702;4050;4438;4439;5572;5865;5866;6452;6453;6454;6455;7660;7795;7796;8127;8228;8229;9627;9628;9760;10941;10942;11832;11895;11896;12085;12086;12087;12150;12151;12152;12284;12285;12388;12389;12390;12391;13651;13652;13915;13916;13933;13934;13935;13936;14092;14093;14094;14601;14602;14603;15295;15296;1…	57;457;779;1542;1848;2193;2270;2328;2416;3701;4050;4438;5572;5866;6454;7660;7796;8127;8228;9627;9760;10942;11832;11896;12087;12152;12284;12390;13651;13916;13933;14092;14094;14602;15295;15297;15298;15381;16014;16242;16665;18637;18674	54;55;56;57;58;59;60;61;62;63	107;148;304;340;581;597;598;689;725;847
SPAPB1E7.12|rps602|I|40S;SPAC13G6.07c|rps601|I|40S	SPAPB1E7.12|rps602|I|40S;SPAC13G6.07c|rps601|I|40S	4;4	4;4	4;4	>SPAPB1E7.12|rps602|I|40S ribosomal protein S6;>SPAC13G6.07c|rps601|I|40S ribosomal protein S6	2	4	4	4	4	1	4	1	4	1	20.9	20.9	20.9	27.475	239	239;239	0	8.1698	By MS/MS	By MS/MS	20.9	5.9	34350000	27980000	6370600	20573000	0	4	1	5				93	1917;4617;6252;6253	True;True;True;True	2014;4837;6596;6597;6598	3917;9769;13646;13647;13648;13649	3639;9020;12816;12817;12818;12819	3639;9020;12816;12819	64	63
SPAC13G6.11c|erg12|I|mevalonate	SPAC13G6.11c|erg12|I|mevalonate	2	2	2	>SPAC13G6.11c|erg12|I|mevalonate kinase Erg12 (predicted)	1	2	2	2	2	1	2	1	2	1	8.4	8.4	8.4	43.406	404	404	0	10.925	By MS/MS	By MS/MS	8.4	4.2	28859000	12427000	16432000	9664500	18359000	3	1	4				94	5078;6688	True;True	5316;7052	10654;10655;10656;10657;14616	9840;9841;9842;13707	9840;13707
SPAC13G7.01c|erg7|I|lanosterol	SPAC13G7.01c|erg7|I|lanosterol	2	2	2	>SPAC13G7.01c|erg7|I|lanosterol synthase Erg7	1	2	2	2	1	1	1	1	1	1	1.9	1.9	1.9	82.818	721	721	0.00081037	2.1435	By MS/MS	By MS/MS	1	1	2397700	2397700	0	2236400	0	1	1	2				95	393;5024	True;True	411;5261	872;10557	802;9754	802;9754
SPAC13G7.02c|ssa1|I|heat	SPAC13G7.02c|ssa1|I|heat	37	12	12	>SPAC13G7.02c|ssa1|I|heat shock protein Ssa1 (predicted)	1	37	12	12	35	30	11	10	11	10	56.1	23.6	23.6	70.142	644	644	0	60.633	By MS/MS	By MS/MS	51.6	50	234140000	141040000	93097000	91451000	116900000	12	10	22				96	615;660;869;905;963;964;1538;1682;1715;1878;1889;3480;3816;4139;5389;5390;5404;5405;5587;5756;5962;5963;5982;5983;5984;6030;6575;6922;6923;7288;7594;7715;7716;7877;7975;8198;8691	False;False;False;False;True;True;True;True;True;False;False;False;False;True;True;True;False;False;True;False;False;False;False;False;False;False;False;False;False;True;True;False;False;True;False;False;False	640;688;909;950;1012;1013;1620;1621;1770;1804;1971;1982;3633;3990;4332;5632;5633;5648;5649;5876;6071;6284;6285;6286;6287;6308;6309;6310;6357;6933;7299;7300;7678;7996;7997;8128;8129;8297;8404;8638;9156	1327;1328;1329;1330;1428;1429;1430;1431;1432;1874;1875;1876;1877;1958;2062;2063;2064;2065;3194;3195;3196;3458;3507;3825;3826;3827;3853;3854;3855;3856;3857;7321;7322;7323;7324;7325;7326;7327;8067;8068;8793;8794;11278;11279;11280;11281;11282;11283;11326;11327;11328;11329;11330;11331;11968;11969;12556;12557;12558;12559;12560;12561;12979;12980;12981;12982;12983;12984;12985;12986;12987;12988;12989;129…	1212;1213;1214;1310;1311;1312;1313;1725;1726;1727;1728;1729;1730;1804;1899;1900;1901;1902;2958;2959;3206;3248;3538;3539;3540;3570;3571;3572;3573;3574;3575;3576;3577;3578;3579;6779;6780;6781;6782;6783;6784;7468;8111;10409;10410;10411;10412;10456;10457;10458;10459;10460;10461;11104;11105;11803;11804;11805;11806;11807;11808;11809;12197;12198;12199;12200;12201;12202;12203;12204;12205;12206;12207;1220…	1214;1312;1730;1804;1900;1901;2959;3206;3248;3538;3576;6780;7468;8111;10409;10410;10456;10461;11105;11809;12199;12208;12260;12261;12262;12335;13485;14158;14163;14849;15394;15711;15714;16069;16261;16743;17672	65;66;67	59;120;605
SPAC140.01|sdh2|I|succinate	SPAC140.01|sdh2|I|succinate	4	4	4	>SPAC140.01|sdh2|I|succinate dehydrogenase (ubiquinone) iron-sulfur protein subunit (predicted)	1	4	4	4	3	4	3	4	3	4	16	16	16	31.425	275	275	0	12.414	By MS/MS	By MS/MS	12	16	49028000	27211000	21817000	24454000	22744000	2	4	6				97	828;1137;2600;3505	True;True;True;True	865;1195;2717;3660	1778;2418;2419;5435;5436;7381;7382	1629;2226;2227;5048;6830;6831	1629;2226;5048;6831
SPAC1420.02c|cct5|I|chaperonin-containing	SPAC1420.02c|cct5|I|chaperonin-containing	9	9	9	>SPAC1420.02c|cct5|I|chaperonin-containing T-complex epsilon subunit Cct5	1	9	9	9	7	9	7	9	7	9	21.6	21.6	21.6	59.377	546	546	0	51.824	By MS/MS	By MS/MS	17.6	21.6	86612000	36212000	50400000	37329000	46848000	6	7	13				98	250;417;770;914;3013;4919;6245;6246;7189	True;True;True;True;True;True;True;True;True	263;435;807;960;3148;5144;6589;6590;7573	578;924;925;1661;1662;1971;1972;6339;6340;10326;10327;13634;13635;13636;15666;15667	535;851;1527;1528;1816;5869;5870;5871;9540;12806;12807;12808;14669;14670	535;851;1527;1816;5869;9540;12806;12808;14669
SPAPB8E5.02c|rpn502|I|19S;SPAC1420.03|rpn501|I|19S	SPAPB8E5.02c|rpn502|I|19S;SPAC1420.03|rpn501|I|19S	15;15	15;15	15;15	>SPAPB8E5.02c|rpn502|I|19S proteasome regulatory subunit Rpn502;>SPAC1420.03|rpn501|I|19S proteasome regulatory subunit Rpn501	2	15	15	15	15	14	15	14	15	14	33.2	33.2	33.2	51.618	443	443;443	0	52.875	By MS/MS	By MS/MS	33.2	30.2	442320000	245550000	196770000	220260000	205550000	13	13	26				99	203;204;1902;3187;3276;3277;3397;3645;5009;5302;5303;6677;8079;8450;8736	True;True;True;True;True;True;True;True;True;True;True;True;True;True;True	215;216;1997;3326;3419;3420;3545;3810;5244;5545;5546;7039;8512;8907;9201	485;486;487;488;3885;3886;3887;6719;6720;6899;6900;6901;6902;6903;7136;7679;7680;10528;10529;11088;11089;11090;11091;11092;14587;14588;17626;17627;18442;18443;19006;19007	450;451;452;453;3608;3609;3610;6232;6233;6401;6402;6403;6404;6612;7100;7101;9724;9725;10229;10230;10231;10232;10233;13678;13679;16469;16470;17234;17752	450;452;3610;6233;6401;6404;6612;7101;9724;10229;10233;13679;16469;17234;17752
SPAC144.03|ade2|I|adenylosuccinate	SPAC144.03|ade2|I|adenylosuccinate	8	8	8	>SPAC144.03|ade2|I|adenylosuccinate synthetase Ade2	1	8	8	8	7	6	7	6	7	6	24.9	24.9	24.9	47.876	434	434	0	30.474	By MS/MS	By MS/MS	22.8	18.9	132330000	54372000	77958000	53282000	75391000	5	7	12				100	67;262;2282;3209;4348;4723;8127;8261	True;True;True;True;True;True;True;True	68;275;2391;3349;4554;4943;8562;8703	139;602;603;604;4718;6758;9218;9219;9962;9963;17759;17760;18031;18032	121;557;558;4382;6269;8503;8504;9200;9201;16605;16606;16859;16860	121;558;4382;6269;8503;9200;16605;16859
SPAC144.06|apl5|I|AP-3	SPAC144.06|apl5|I|AP-3	3	3	3	>SPAC144.06|apl5|I|AP-3 adaptor complex subunit Apl5 (predicted)	1	3	3	3	3	3	3	3	3	3	3.9	3.9	3.9	93.156	825	825	0	5.8622	By MS/MS	By MS/MS	3.9	3.9	20351000	10689000	9662300	9217600	10415000	2	1	3				101	4428;4449;4828	True;True;True	4640;4661;5051	9386;9387;9422;9423;10154;10155	8669;8702;9382	8669;8702;9382
SPAC31G5.03|rps1101|I|40S;SPAC144.11|rps1102|I|40S	SPAC31G5.03|rps1101|I|40S;SPAC144.11|rps1102|I|40S	12;12	12;12	12;12	>SPAC31G5.03|rps1101|I|40S ribosomal protein S11 (predicted);>SPAC144.11|rps1102|I|40S ribosomal protein S11 (predicted)	2	12	12	12	11	9	11	9	11	9	65.1	65.1	65.1	17.5	152	152;152	0	41.83	By MS/MS	By MS/MS	63.8	49.3	487200000	292140000	195060000	228940000	238610000	11	14	25				102	673;840;1240;1789;3008;3598;3636;5823;6397;6520;7837;7838	True;True;True;True;True;True;True;True;True;True;True;True	701;878;1306;1880;3143;3756;3799;6138;6750;6877;8256;8257	1458;1797;1798;2617;2618;3645;3646;6331;7580;7581;7653;7654;12685;12686;12687;12688;13971;13972;13973;13974;14260;14261;17120;17121	1335;1648;1649;1650;1651;2411;2412;3374;3375;5862;7011;7077;7078;11923;11924;11925;11926;13121;13122;13123;13124;13390;13391;16004;16005	1335;1651;2411;3375;5862;7011;7077;11926;13122;13390;16004;16005
SPAC144.12|rki1|I|ribose	SPAC144.12|rki1|I|ribose	2	2	2	>SPAC144.12|rki1|I|ribose 5-phosphate isomerase Rki1 (predicted)	1	2	2	2	2	2	2	2	2	2	11.3	11.3	11.3	29.329	274	274	0	4.0069	By MS/MS	By MS/MS	11.3	11.3	16179000	6942100	9237300	6090400	9622100	1	1	2				103	4041;4907	True;True	4228;5132	8571;8572;10303;10304	7919;9521	7919;9521
SPAC144.14|klp8|I|kinesin-like	SPAC144.14|klp8|I|kinesin-like	1	1	1	>SPAC144.14|klp8|I|kinesin-like protein Klp8	1	1	1	1	1	1	1	1	1	1	2.2	2.2	2.2	57.253	511	511	0	4.7093	By MS/MS	By MS/MS	2.2	2.2	9333600	3862600	5471000	0	5471000	1	1	2				104	5100	TRUE	5338	10695;10696	9875;9876	9876
SPAC1486.01|sod2|I|mitochondrial	SPAC1486.01|sod2|I|mitochondrial	4	4	4	>SPAC1486.01|sod2|I|mitochondrial superoxide dismutase Sod2	1	4	4	4	3	4	3	4	3	4	25.2	25.2	25.2	24.346	218	218	0	10.511	By MS/MS	By MS/MS	14.7	25.2	76117000	29099000	47018000	29664000	44496000	3	5	8				105	352;690;2104;8874	True;True;True;True	369;719;2206;9345	787;788;1491;4336;4337;4338;4339;19292;19293	726;727;1366;4028;4029;4030;18018;18019	726;1366;4029;18018
SPAC1486.04c|alm1|I|medial	SPAC1486.04c|alm1|I|medial	3	3	3	>SPAC1486.04c|alm1|I|medial ring protein Alm1	1	3	3	3	3	1	3	1	3	1	1.8	1.8	1.8	197.86	1727	1727	0	8.0195	By MS/MS	By MS/MS	1.8	0.8	14293000	8669300	5623500	8086200	0	2	0	2				106	1522;1810;5258	True;True;True	1604;1902;5500	3157;3691;3692;11005	2927;3414;3415;10155	2927;3415;10155
SPAC1486.05|nup189|I|nucleoporin	SPAC1486.05|nup189|I|nucleoporin	1	1	1	>SPAC1486.05|nup189|I|nucleoporin Nup98 and Nup96	1	1	1	1	1	0	1	0	1	0	0.7	0.7	0.7	192.2	1806	1806	0.0086083	1.2652	By MS/MS	By matching	0.7	0	3417300	3417300	0	3187500	0	1	0	1				107	6115	TRUE	6450	13358	12553	12553
SPAC14C4.04|SPAC14C4.04|I|ThiJ	SPAC14C4.04|SPAC14C4.04|I|ThiJ	1	1	1	>SPAC14C4.04|SPAC14C4.04|I|ThiJ domain protein (predicted)	1	1	1	1	1	1	1	1	1	1	3	3	3	29.71	267	267	0.00081235	2.1596	By MS/MS	By MS/MS	3	3	3968700	2536200	1432500	0	1432500	1	1	2				108	5884	TRUE	6200	12809;12810	12040;12041	12041
SPAC14C4.11|vtc2|I|polyphosphate	SPAC14C4.11|vtc2|I|polyphosphate	22	22	22	>SPAC14C4.11|vtc2|I|polyphosphate synthetase, VTC complex subunit Vtc2/3 (predicted)	1	22	22	22	21	15	21	15	21	15	37.9	37.9	37.9	85.444	734	734	0	66.886	By MS/MS	By MS/MS	35.8	25.7	563690000	331090000	232600000	277980000	242000000	22	16	38				109	524;969;1113;1342;1579;2148;2182;2305;2319;2894;2908;3644;4615;4997;5469;5687;5979;6261;6767;7478;8821;9041	True;True;True;True;True;True;True;True;True;True;True;True;True;True;True;True;True;True;True;True;True;True	545;1018;1167;1413;1664;2252;2290;2414;2428;2429;3023;3037;3809;4835;5231;5715;5998;6305;6606;7138;7873;9289;9518	1148;1149;2082;2366;2812;2813;3273;4422;4423;4502;4503;4756;4757;4786;4787;4788;4789;6074;6104;7677;7678;9765;9766;10500;10501;11460;11461;12372;12373;12374;12375;13035;13036;13037;13038;13660;13661;13662;13663;14789;16239;19173;19174;19722;19723	1055;1056;1919;2181;2593;2594;3028;4101;4102;4173;4416;4442;4443;5626;5654;7098;7099;9017;9018;9696;9697;10585;10586;11641;11642;11643;11644;12253;12254;12255;12829;12830;12831;12832;13869;15180;17906;17907;18511	1056;1919;2181;2593;3028;4101;4173;4416;4442;5626;5654;7098;9017;9696;10586;11644;12253;12832;13869;15180;17907;18511	68	214
SPAC14C4.14|atp1|I|F1-ATPase	SPAC14C4.14|atp1|I|F1-ATPase	19	19	19	>SPAC14C4.14|atp1|I|F1-ATPase alpha subunit	1	19	19	19	18	15	18	15	18	15	40.7	40.7	40.7	58.587	536	536	0	85.054	By MS/MS	By MS/MS	38.2	31.7	462820000	243700000	219120000	208350000	238080000	16	13	29				110	43;288;562;1338;1555;1740;2541;2998;3763;4390;4459;6383;6401;7240;7348;7484;7485;8491;8739	True;True;True;True;True;True;True;True;True;True;True;True;True;True;True;True;True;True;True	43;302;585;1409;1639;1830;2657;3133;3935;4599;4671;6735;6754;7627;7740;7881;7882;8948;9205	94;652;653;1222;1223;2804;3231;3556;3557;5307;5308;6307;6308;6309;6310;7963;9287;9443;9444;13942;13943;13979;13980;15770;15771;15997;15998;16260;16261;16262;16263;16264;16265;18517;18518;19012;19013	83;600;601;1122;1123;2586;2991;3295;3296;4932;4933;5838;5839;5840;5841;7371;8566;8721;8722;13094;13095;13129;14762;14962;15201;15202;15203;15204;15205;17297;17298;17756;17757	83;600;1122;2586;2991;3296;4932;5839;7371;8566;8722;13094;13129;14762;14962;15201;15205;17298;17757
SPAC1527.03|SPAC1527.03|I|RNA-binding	SPAC1527.03|SPAC1527.03|I|RNA-binding	1	1	1	>SPAC1527.03|SPAC1527.03|I|RNA-binding protein (predicted)	1	1	1	1	0	1	0	1	0	1	3.4	3.4	3.4	53.232	475	475	0	3.2551	By matching	By MS/MS	0	3.4	5092900	0	5092900	0	5092900	0	1	1				111	8957	TRUE	9432	19471	18179	18179
SPAC1556.01c|rad50|I|DNA	SPAC1556.01c|rad50|I|DNA	1	1	1	>SPAC1556.01c|rad50|I|DNA repair protein Rad50	1	1	1	1	1	0	1	0	1	0	0.8	0.8	0.8	149.03	1285	1285	0	2.2737	By MS/MS	By matching	0.8	0	2828800	2828800	0	2638500	0	1	0	1				112	7216	TRUE	7603	15721	14723	14723
SPAC1556.02c|sdh1|I|succinate	SPAC1556.02c|sdh1|I|succinate	19	19	19	>SPAC1556.02c|sdh1|I|succinate dehydrogenase Sdh1 (predicted)	1	19	19	19	18	14	18	14	18	14	36.2	36.2	36.2	70.465	641	641	0	72.309	By MS/MS	By MS/MS	35.6	28.2	437970000	215040000	222930000	172710000	245350000	21	17	38				113	61;164;747;920;1220;1359;2235;2236;2713;2779;3120;4489;5862;7605;7618;7680;7969;8883;9249	True;True;True;True;True;True;True;True;True;True;True;True;True;True;True;True;True;True;True	62;173;781;966;1283;1432;2343;2344;2833;2905;3257;4704;6177;8010;8023;8087;8397;8398;9355;9737	129;130;131;414;415;1608;1609;1979;2583;2584;2585;2848;4636;4637;5671;5672;5828;5829;6592;6593;9510;9511;12771;12772;16524;16544;16545;16546;16547;16548;16703;16704;17385;17386;19312;19313;19314;19315;20147;20148	110;111;112;113;382;383;1477;1478;1823;2378;2379;2380;2627;4307;4308;4309;5252;5253;5396;5397;6111;6112;8780;8781;12003;12004;15450;15468;15469;15470;15471;15615;16243;16244;18036;18037;18038;18039;18907;18908	110;383;1477;1823;2380;2627;4307;4309;5252;5397;6111;8781;12003;15450;15468;15615;16244;18037;18907	69	626
SPAC1556.07|pmm1|I|phosphomannomutase	SPAC1556.07|pmm1|I|phosphomannomutase	4	4	4	>SPAC1556.07|pmm1|I|phosphomannomutase Pmm1	1	4	4	4	4	4	4	4	4	4	19.5	19.5	19.5	29.223	257	257	0	10.913	By MS/MS	By MS/MS	19.5	19.5	44523000	18348000	26174000	15983000	27306000	2	3	5				114	1425;2745;5250;7795	True;True;True;True	1501;2868;5492;8210	2952;2953;5742;5743;10992;10993;16993;16994	2729;2730;5318;5319;10145;15896	2730;5318;10145;15896
SPAC1565.01|rcf2|I|cytochrome	SPAC1565.01|rcf2|I|cytochrome	2	2	2	>SPAC1565.01|rcf2|I|cytochrome c oxidase assembly protein Rcf2	1	2	2	2	1	2	1	2	1	2	6.2	6.2	6.2	27.052	242	242	0	2.3126	By matching	By MS/MS	3.3	6.2	9792700	3037000	6755700	0	6755700	0	2	2				115	2607;6037	True;True	2724;6364	5454;13151;13152	5067;12349	5067;12349
SPAC1565.04c|ste4|I|adaptor	SPAC1565.04c|ste4|I|adaptor	4	4	4	>SPAC1565.04c|ste4|I|adaptor protein Ste4	1	4	4	4	4	2	4	2	4	2	16.3	16.3	16.3	30.735	264	264	0	15.558	By MS/MS	By MS/MS	16.3	8.3	37640000	28194000	9445800	20350000	15393000	4	2	6				116	999;1000;1300;3263	True;True;True;True	1050;1051;1370;3405	2144;2145;2730;2731;6871;6872	1975;1976;2513;2514;6376;6377	1975;1976;2514;6377	70	52
SPAC1565.08|cdc48|I|AAA	SPAC1565.08|cdc48|I|AAA	10	10	10	>SPAC1565.08|cdc48|I|AAA family ATPase involved in ubiquitin-mediated protein degradation Cdc48	1	10	10	10	7	9	7	9	7	9	16.1	16.1	16.1	90.124	815	815	0	27.61	By MS/MS	By MS/MS	10.9	14.6	131740000	64932000	66806000	59547000	67824000	7	8	15				117	282;1600;1826;2787;4102;4376;5993;6634;8859;9034	True;True;True;True;True;True;True;True;True;True	296;1685;1918;2913;4293;4584;6319;6993;9329;9511	644;3312;3313;3720;3721;5843;5844;8709;9263;9264;13059;13060;13061;14494;14495;19257;19711	592;3064;3065;3441;3442;5410;5411;8042;8544;12274;12275;12276;13593;17986;18499	592;3065;3441;5411;8042;8544;12276;13593;17986;18499
SPAC15A10.02|taf12|I|transcription	SPAC15A10.02|taf12|I|transcription	2	2	2	>SPAC15A10.02|taf12|I|transcription factor TFIID complex subunit A/ SAGA complex subunit Taf12	1	2	2	2	2	2	2	2	2	2	5.3	5.3	5.3	49.195	450	450	0	5.0646	By MS/MS	By matching	5.3	5.3	37515000	30883000	6631800	0	6631800	1	0	1				118	5050;6362	True;True	5287;6712	10598;10599;13901;13902	9791;13062	9791;13062
SPAC15A10.11|ubr11|I|UBR	SPAC15A10.11|ubr11|I|UBR	3	3	3	>SPAC15A10.11|ubr11|I|UBR ubiquitin-protein ligase E3 Ubr11	1	3	3	3	3	3	3	3	3	3	1.5	1.5	1.5	234.04	2052	2052	0	11.089	By MS/MS	By MS/MS	1.5	1.5	22228000	10351000	11876000	9040200	12491000	2	3	5				119	6941;8247;9325	True;True;True	7318;8689;9815	15155;15156;18006;18007;20317;20318	14197;14198;16836;19068;19069	14197;16836;19069
SPAC15A10.15|sgo2|I|inner	SPAC15A10.15|sgo2|I|inner	3	3	3	>SPAC15A10.15|sgo2|I|inner centromere protein, shugoshin Sgo2	1	3	3	3	3	1	3	1	3	1	6.5	6.5	6.5	72.484	647	647	0	12.582	By MS/MS	By matching	6.5	1.4	21839000	19027000	2811400	17748000	0	3	0	3				120	1973;4886;5874	True;True;True	2073;5111;6189	4080;10265;10266;12792	3797;9483;12024	3797;9483;12024
SPAC15E1.03|rpl42|I|60S	SPAC15E1.03|rpl42|I|60S	1	1	1	>SPAC15E1.03|rpl42|I|60S ribosomal protein L36/L42	1	1	1	1	1	0	1	0	1	0	7.5	7.5	7.5	12.205	106	106	0.0097357	1.047	By MS/MS	By matching	7.5	0	778340	778340	0	725990	0	1	0	1				121	2922	TRUE	3051	6134	5682	5682
SPAC15E1.04|hal3|I|thymidylate	SPAC15E1.04|hal3|I|thymidylate	1	1	1	>SPAC15E1.04|hal3|I|thymidylate synthase/ flavoprotein fusion protein Hal3	1	1	1	1	1	0	1	0	1	0	2.1	2.1	2.1	69.893	625	625	0.0052045	1.4737	By MS/MS	By matching	2.1	0	2540800	2540800	0	2369900	0	0	0	0				122	8267	TRUE	8709	18045	16871	16871
SPAC1635.01|SPAC1635.01|I|mitochondrial	SPAC1635.01|SPAC1635.01|I|mitochondrial	8	8	8	>SPAC1635.01|SPAC1635.01|I|mitochondrial outer membrane voltage-dependent anion-selective channel (predicted)	1	8	8	8	8	7	8	7	8	7	53.2	53.2	53.2	29.653	282	282	0	103.11	By MS/MS	By MS/MS	53.2	42.2	612070000	333880000	278190000	295070000	294550000	10	10	20				123	530;571;949;2658;7489;7944;8287;8980	True;True;True;True;True;True;True;True	551;594;998;2776;7886;8370;8731;9455	1159;1160;1161;1239;1240;2037;2038;2039;2040;5560;16273;16274;16275;16276;17331;17332;18082;18083;19514;19515;19516;19517	1064;1065;1066;1138;1877;1878;1879;5161;15213;15214;15215;15216;15217;16192;16904;16905;18213;18214;18215;18216	1064;1138;1879;5161;15215;16192;16905;18214
SPAC1639.01c|SPAC1639.01c|I|GNS1/SUR4	SPAC1639.01c|SPAC1639.01c|I|GNS1/SUR4	1	1	1	>SPAC1639.01c|SPAC1639.01c|I|GNS1/SUR4 family protein (predicted)	1	1	1	1	1	1	1	1	1	1	3	3	3	41.54	365	365	0	4.7689	By MS/MS	By MS/MS	3	3	23685000	11155000	12530000	0	12530000	1	1	2				124	6596	TRUE	6954	14416;14417	13526;13527	13526
SPAC167.05|dbs2|I|Usp	SPAC167.05|dbs2|I|Usp	1	1	1	>SPAC167.05|dbs2|I|Usp (universal stress protein) family protein, implicated in meiotic chromosome segregation	1	1	1	1	1	1	1	1	1	1	1.5	1.5	1.5	65.947	601	601	0.0066079	1.4002	By MS/MS	By MS/MS	1.5	1.5	3940900	1610400	2330600	0	2330600	0	1	1				125	3014	TRUE	3149	6341;6342	5872;5873	5872
SPAC1687.06c|rpl44|I|60S	SPAC1687.06c|rpl44|I|60S	3	3	3	>SPAC1687.06c|rpl44|I|60S ribosomal protein L28/L44 (predicted)	1	3	3	3	2	3	2	3	2	3	22.4	22.4	22.4	14.755	134	134	0	20.844	By MS/MS	By MS/MS	17.2	22.4	27636000	14151000	13486000	13204000	13480000	2	3	5				126	2820;6581;7408	True;True;True	2947;6939;7802	5910;14382;14383;16121;16122	5476;13494;13495;15074;15075	5476;13494;15074
SPAC1687.10|mcp1|I|microtubule	SPAC1687.10|mcp1|I|microtubule	1	1	1	>SPAC1687.10|mcp1|I|microtubule binding protein Mcp1	1	1	1	1	1	0	1	0	1	0	1.4	1.4	1.4	75.944	661	661	0.0037707	1.5756	By MS/MS	By matching	1.4	0	0	0	0	0	0	1	0	1				127	4968	TRUE	5201	10442	9648	9648
SPAC1687.15|gsk3|I|serine/threonine	SPAC1687.15|gsk3|I|serine/threonine	7	7	7	>SPAC1687.15|gsk3|I|serine/threonine protein kinase Gsk3	1	7	7	7	6	7	6	7	6	7	19.1	19.1	19.1	44.165	387	387	0	19.569	By MS/MS	By MS/MS	15.8	19.1	87914000	51844000	36070000	42401000	42026000	6	6	12				128	886;1022;3686;4329;5457;6993;7402	True;True;True;True;True;True;True	926;1075;3852;4534;5703;7372;7796	1905;1906;1907;2192;2193;7763;7764;9187;9188;11439;11440;15280;16109;16110	1756;1757;1758;2022;7181;7182;8471;8472;10565;10566;14315;15063;15064	1757;2022;7182;8472;10565;14315;15063
SPAC1687.21|SPAC1687.21|I|phosphoglycerate	SPAC1687.21|SPAC1687.21|I|phosphoglycerate	2	2	2	>SPAC1687.21|SPAC1687.21|I|phosphoglycerate mutase family (predicted)	1	2	2	2	2	2	2	2	2	2	14.8	14.8	14.8	23.698	209	209	0	8.053	By MS/MS	By MS/MS	14.8	14.8	15533000	13347000	2186200	12449000	0	2	1	3				129	846;2530	True;True	884;2646	1806;1807;5286;5287	1658;4913;4914	1658;4913
SPAC1687.22c|puf3|I|pumilio	SPAC1687.22c|puf3|I|pumilio	2	2	2	>SPAC1687.22c|puf3|I|pumilio family RNA-binding protein Puf3 (predicted)	1	2	2	2	1	2	1	2	1	2	3.7	3.7	3.7	81.068	732	732	0	2.2247	By MS/MS	By MS/MS	1.1	3.7	6800200	2603800	4196400	0	4196400	1	2	3				130	6286;6771	True;True	6631;7142	13716;13717;14797	12879;12880;13875	12880;13875
SPAC16A10.03c|SPAC16A10.03c|I|ubiquitin-protein	SPAC16A10.03c|SPAC16A10.03c|I|ubiquitin-protein	3	3	3	>SPAC16A10.03c|SPAC16A10.03c|I|ubiquitin-protein ligase E3 Pep5/Vps11-like (predicted)	1	3	3	3	3	1	3	1	3	1	3.8	3.8	3.8	97.485	847	847	0	3.19	By MS/MS	By MS/MS	3.8	1.4	14827000	11513000	3314100	10738000	0	2	1	3				131	1594;3867;6482	True;True;True	1679;4046;6837	3298;3299;8174;14179	3051;3052;7559;13319	3051;7559;13319
SPAC16C9.04c|mot2|I|CCR4-Not	SPAC16C9.04c|mot2|I|CCR4-Not	1	1	1	>SPAC16C9.04c|mot2|I|CCR4-Not complex ubiquitin-protein ligase E3 subunit Mot2 (predicted)	1	1	1	1	1	1	1	1	1	1	2.2	2.2	2.2	54.417	489	489	0	2.4043	By matching	By MS/MS	2.2	2.2	6225800	2782300	3443500	0	3443500	0	1	1				132	332	TRUE	348	738;739	679	679
SPAC16C9.06c|upf1|I|ATP-dependent	SPAC16C9.06c|upf1|I|ATP-dependent	9	9	9	>SPAC16C9.06c|upf1|I|ATP-dependent RNA helicase Upf1	1	9	9	9	8	7	8	7	8	7	12.1	12.1	12.1	104.53	925	925	0	28.486	By MS/MS	By MS/MS	9.7	9.2	78567000	44923000	33644000	36450000	39095000	8	5	13				133	586;873;4642;6051;6837;7231;8103;9093;9292	True;True;True;True;True;True;True;True;True	609;913;4862;6378;7210;7618;8537;9574;9781	1267;1268;1882;9812;9813;13177;13178;14924;14925;15756;17678;19821;19822;20247;20248	1162;1163;1735;9060;9061;12373;12374;13989;13990;14751;16516;18602;18603;19004	1163;1735;9060;12373;13989;14751;16516;18602;19004
SPAC16E8.01|shd1|I|cytoskeletal	SPAC16E8.01|shd1|I|cytoskeletal	12	12	12	>SPAC16E8.01|shd1|I|cytoskeletal protein binding protein Sla1 family, Shd1 (predicted)	1	12	12	12	10	9	10	9	10	9	13.8	13.8	13.8	154.63	1420	1420	0	39.992	By MS/MS	By MS/MS	11.1	10.8	157320000	63795000	93530000	59306000	93728000	8	9	17				134	408;538;637;5529;6071;6967;7609;7620;7801;8514;8771;9299	True;True;True;True;True;True;True;True;True;True;True;True	426;559;662;5795;6402;7346;8014;8025;8216;8973;9238;9788	908;1173;1174;1373;11716;11717;13248;13249;13250;15225;15226;16529;16550;16551;17007;18563;19078;19079;20261;20262	836;1075;1076;1253;10852;10853;12438;12439;12440;14259;14260;15454;15473;15474;15908;17342;17343;17821;19018;19019	836;1075;1253;10853;12439;14259;15454;15473;15908;17343;17821;19018
SPAC16E8.07c|vph1|I|V-type	SPAC16E8.07c|vph1|I|V-type	3	3	3	>SPAC16E8.07c|vph1|I|V-type ATPase V0 subunit a (predicted)	1	3	3	3	3	3	3	3	3	3	5.3	5.3	5.3	94.158	831	831	0	6.1629	By MS/MS	By MS/MS	5.3	5.3	48313000	22676000	25638000	22576000	24213000	1	2	3				135	2639;7927;9193	True;True;True	2757;8351;9678	5516;5517;17295;17296;20028;20029	5121;16160;18791;18792	5121;16160;18792
SPAC16E8.09|scd1|I|RhoGEF	SPAC16E8.09|scd1|I|RhoGEF	2	2	2	>SPAC16E8.09|scd1|I|RhoGEF Scd1	1	2	2	2	2	1	2	1	2	1	2.4	2.4	2.4	99.101	872	872	0	5.164	By MS/MS	By MS/MS	2.4	1.1	11058000	8443700	2614800	7875800	0	2	0	2				136	474;2389	True;True	495;2502	1061;1062;4923	974;975;4563	974;4563
SPAC16E8.15|tif45|I|translation	SPAC16E8.15|tif45|I|translation	2	2	2	>SPAC16E8.15|tif45|I|translation initiation factor eIF4E, 4F complex subunit	1	2	2	2	2	2	2	2	2	2	8.7	8.7	8.7	24.958	218	218	0	3.1908	By MS/MS	By MS/MS	8.7	8.7	3179900000	1059800000	2120100000	1431900000	1676800000	2	0	2				137	6475;7990	True;True	6830;8419	14164;14165;17431;17432	13306;16288;16289	13306;16288
SPAC16E8.17c|SPAC16E8.17c|I|succinate-CoA	SPAC16E8.17c|SPAC16E8.17c|I|succinate-CoA	2	2	2	>SPAC16E8.17c|SPAC16E8.17c|I|succinate-CoA ligase alpha subunit (predicted)	1	2	2	2	1	1	1	1	1	1	7.3	7.3	7.3	34.706	331	331	0.0037764	1.587	By MS/MS	By MS/MS	4.5	2.7	2195000	2195000	0	2047400	0	1	1	2				138	7149;8335	True;True	7531;8781	15584;18196	14591;17011	14591;17011
SPAC1751.03|tif313|I|translation	SPAC1751.03|tif313|I|translation	5	5	5	>SPAC1751.03|tif313|I|translation initiation factor eIF3m	1	5	5	5	4	4	4	4	4	4	13.9	13.9	13.9	45.085	402	402	0	13.414	By MS/MS	By MS/MS	12.9	10.7	31179000	17465000	13714000	13495000	16509000	4	3	7				139	2916;4905;5200;8230;9059	True;True;True;True;True	3045;5130;5441;8672;9536	6119;6120;10299;10300;10892;10893;17976;19754;19755	5669;9518;9519;10054;10055;16807;18540;18541	5669;9518;10055;16807;18540
SPAC1782.05|ypa2|I|protein	SPAC1782.05|ypa2|I|protein	3	3	3	>SPAC1782.05|ypa2|I|protein phosphatase type 2A regulator, PTPA family Ypa2	1	3	3	3	1	3	1	3	1	3	10.5	10.5	10.5	40.288	352	352	0	12.383	By MS/MS	By MS/MS	2	10.5	8763900	2155300	6608600	0	6608600	1	4	5				140	1982;4585;6331	True;True;True	2082;4804;4805;6678	4102;9712;9713;13819;13820	3817;8969;8970;12975;12976	3817;8970;12976	71	119
SPAC1782.11|met14|I|adenylyl-sulfate	SPAC1782.11|met14|I|adenylyl-sulfate	2	2	2	>SPAC1782.11|met14|I|adenylyl-sulfate kinase (predicted)	1	2	2	2	2	2	2	2	2	2	15.8	15.8	15.8	22.669	202	202	0	6.9508	By MS/MS	By MS/MS	15.8	15.8	20680000	11117000	9563200	0	9563200	3	2	5				141	694;1949	True;True	723;2047	1498;1499;3979;3980	1371;1372;1373;3698;3699	1373;3698
SPAC1783.05|hrp1|I|ATP-dependent	SPAC1783.05|hrp1|I|ATP-dependent	1	1	1	>SPAC1783.05|hrp1|I|ATP-dependent DNA helicase Hrp1	1	1	1	1	1	0	1	0	1	0	0.7	0.7	0.7	158.55	1373	1373	0	2.9845	By MS/MS	By matching	0.7	0	0	0	0	0	0	1	0	1				142	9335	TRUE	9825	20343	19104	19104
SPAC1783.07c|pap1|I|transcription	SPAC1783.07c|pap1|I|transcription	3	3	3	>SPAC1783.07c|pap1|I|transcription factor Pap1/Caf3	1	3	3	3	2	2	2	2	2	2	6.7	6.7	6.7	61.531	552	552	0	7.7864	By MS/MS	By MS/MS	4.3	4.2	21331000	14640000	6691000	13655000	0	2	2	4				143	401;1551;6091	True;True;True	419;1635;6424;6425	891;892;3221;13296;13297	818;819;2983;12492;12493	819;2983;12492	72	384
SPAC1783.08c|rpl1502|I|60S;SPCC576.11|rpl15|III|60S	SPAC1783.08c|rpl1502|I|60S;SPCC576.11|rpl15|III|60S	7;6	7;6	7;6	>SPAC1783.08c|rpl1502|I|60S ribosomal protein L15b (predicted);>SPCC576.11|rpl15|III|60S ribosomal protein L15 (predicted)	2	7	7	7	7	6	7	6	7	6	36.8	36.8	36.8	23.822	201	201;201	0	28.796	By MS/MS	By MS/MS	36.8	33.3	277820000	125600000	152220000	113830000	155540000	8	10	18				144	1906;2704;3062;3658;6419;9169;9224	True;True;True;True;True;True;True	2001;2824;3199;3824;6772;9653;9709	3892;3893;5649;5650;5651;5652;6470;6471;7709;7710;7711;7712;14017;14018;19981;20080;20081;20082	3614;3615;5233;5234;6001;6002;6003;6004;7131;7132;7133;7134;13160;13161;18751;18839;18840;18841	3615;5234;6002;7131;13161;18751;18841
SPAC17A2.01|bsu1|I|high-affinity	SPAC17A2.01|bsu1|I|high-affinity	3	3	3	>SPAC17A2.01|bsu1|I|high-affinity import carrier for pyridoxine, pyridoxal, and pyridoxamine Bsu1	1	3	3	3	3	2	3	2	3	2	5.3	5.3	5.3	58.484	526	526	0	5.9652	By MS/MS	By MS/MS	5.3	4	30616000	17579000	13036000	15140000	14294000	3	2	5				145	2306;3221;3847	True;True;True	2415;3361;4025	4758;4759;6783;6784;8132	4417;4418;6294;6295;7521	4417;6295;7521
SPAC17A2.02c|SPAC17A2.02c|I|DUF887	SPAC17A2.02c|SPAC17A2.02c|I|DUF887	1	1	1	>SPAC17A2.02c|SPAC17A2.02c|I|DUF887 family protein	1	1	1	1	1	0	1	0	1	0	4.8	4.8	4.8	33.042	290	290	0.0092857	1.2296	By MS/MS	By matching	4.8	0	12897000	12897000	0	12029000	0	1	0	1				146	7227	TRUE	7614	15748	14744	14744
SPAC17A2.03c|vma6|I|V-type	SPAC17A2.03c|vma6|I|V-type	1	1	1	>SPAC17A2.03c|vma6|I|V-type ATPase V0 subunit d (predicted)	1	1	1	1	1	0	1	0	1	0	3.2	3.2	3.2	39.323	343	343	0	2.2986	By MS/MS	By matching	3.2	0	4523600	4523600	0	4219300	0	1	0	1				147	5468	TRUE	5714	11459	10584	10584
SPAC17A2.12|rrp1|I|ATP-dependent	SPAC17A2.12|rrp1|I|ATP-dependent	2	2	2	>SPAC17A2.12|rrp1|I|ATP-dependent DNA helicase/ ubiquitin-protein ligase E3 (predicted)	1	2	2	2	2	1	2	1	2	1	2.3	2.3	2.3	101.38	897	897	0.0037821	1.5984	By MS/MS	By MS/MS	2.3	1.3	17165000	13150000	4014500	12266000	0	2	1	3				148	83;8547	True;True	84;9009	164;18630;18631	142;17405;17406	142;17405
SPAC17A2.13c|rad25|I|14-3-3	SPAC17A2.13c|rad25|I|14-3-3	10	10	9	>SPAC17A2.13c|rad25|I|14-3-3 protein Rad25	1	10	10	9	10	5	10	5	9	4	52.2	52.2	48.5	30.369	270	270	0	86.202	By MS/MS	By MS/MS	52.2	21.5	193320000	111100000	82216000	59380000	114050000	11	6	17				149	49;1154;1204;1361;3288;3488;4013;4233;6463;9156	True;True;True;True;True;True;True;True;True;True	49;50;1215;1266;1267;1434;3432;3641;4198;4432;6818;9640	104;105;2459;2553;2554;2555;2556;2850;6926;6927;7341;8494;8495;8996;8997;14142;19960;19961	90;91;2266;2352;2353;2354;2355;2629;6426;6427;6797;7844;7845;7846;8296;13289;18736;18737	90;2266;2355;2629;6427;6797;7845;8296;13289;18737	73;74	170;222
SPAC17A5.01|pex6|I|peroxin-6	SPAC17A5.01|pex6|I|peroxin-6	2	2	2	>SPAC17A5.01|pex6|I|peroxin-6 (predicted)	1	2	2	2	1	1	1	1	1	1	3	3	3	106.5	948	948	0	4.4519	By MS/MS	By MS/MS	2.1	0.8	5840500	3695800	2144700	3447200	0	1	1	2				150	1222;6953	True;True	1285;7330	2587;15186	2382;14225	2382;14225
SPAPB8E5.06c|rpl302|I|60S;SPAC17A5.03|rpl301|I|60S	SPAPB8E5.06c|rpl302|I|60S;SPAC17A5.03|rpl301|I|60S	11;11	11;11	11;11	>SPAPB8E5.06c|rpl302|I|60S ribosomal protein L3;>SPAC17A5.03|rpl301|I|60S ribosomal protein L3	2	11	11	11	10	10	10	10	10	10	29.9	29.9	29.9	43.816	388	388;388	0	35.352	By MS/MS	By MS/MS	27.6	28.1	196680000	90655000	106030000	79792000	110790000	7	9	16				151	231;907;2956;3946;6235;7042;7088;7089;7301;8064;8408	True;True;True;True;True;True;True;True;True;True;True	243;952;3087;4125;6578;7421;7469;7470;7691;8496;8862	540;541;1960;1961;1962;6204;6205;8334;8335;13610;15372;15373;15464;15465;15466;15467;15468;15469;15893;15894;17590;17591;18363	502;1806;1807;1808;5742;7707;12783;14401;14402;14484;14485;14486;14487;14488;14873;14874;16436;16437;17162	502;1808;5742;7707;12783;14401;14484;14488;14873;16436;17162
SPAC17A5.06|ptr8|I|transcription	SPAC17A5.06|ptr8|I|transcription	3	3	3	>SPAC17A5.06|ptr8|I|transcription factor TFIIH complex ERCC-3 subunit Ptr8	1	3	3	3	3	3	3	3	3	3	4.1	4.1	4.1	91.344	804	804	0	7.0992	By MS/MS	By MS/MS	4.1	4.1	19556000	10200000	9355700	9025900	9843700	2	1	3				152	3494;4538;4830	True;True;True	3648;4755;5053	7354;7355;9612;9613;10158;10159	6806;6807;8875;8876;9385;9386	6807;8875;9386
SPAC17A5.14|exo2|I|exonuclease	SPAC17A5.14|exo2|I|exonuclease	21	21	21	>SPAC17A5.14|exo2|I|exonuclease II Exo2	1	21	21	21	17	13	17	13	17	13	17.1	17.1	17.1	152.59	1328	1328	0	47.005	By MS/MS	By MS/MS	13.9	11.7	185740000	110390000	75348000	77567000	100750000	13	11	24				153	124;167;1384;1628;2332;2527;2827;3347;3365;4604;6105;6380;6517;6673;7187;7505;8167;8274;8660;9028;9369	True;True;True;True;True;True;True;True;True;True;True;True;True;True;True;True;True;True;True;True;True	132;176;1457;1715;2442;2643;2954;3495;3513;4824;6439;6732;6874;7034;7571;7902;8604;8717;9125;9505;9859	269;270;419;420;2879;3364;4811;5280;5281;5921;7042;7043;7075;7076;9748;13326;13938;14257;14575;15662;16302;16303;17840;17841;18056;18057;18853;19620;20409;20410	239;240;387;388;2657;3115;4461;4907;4908;5486;6531;6532;6559;6560;9003;12521;13091;13387;13660;14666;15240;15241;16676;16677;16881;17612;18308;19160	240;388;2657;3115;4461;4907;5486;6531;6559;9003;12521;13091;13387;13660;14666;15240;16676;16881;17612;18308;19160	75	769
SPAC17A5.15c|gus1|I|cytoplasmic	SPAC17A5.15c|gus1|I|cytoplasmic	7	7	7	>SPAC17A5.15c|gus1|I|cytoplasmic glutamate-tRNA ligase gus1 (predicted)	1	7	7	7	6	4	6	4	6	4	13.3	13.3	13.3	80.749	716	716	0	26.905	By MS/MS	By MS/MS	9.1	8.7	75702000	37046000	38656000	38207000	35003000	6	3	9				154	32;1053;1185;3449;4019;4276;9036	True;True;True;True;True;True;True	32;1106;1247;3601;4204;4476;9513	68;69;2248;2524;7254;8506;8507;9074;9075;19714	59;60;2072;2329;6716;7856;7857;8369;8370;18501	60;2072;2329;6716;7856;8369;18501
SPAC17C9.03|tif471|I|translation	SPAC17C9.03|tif471|I|translation	13	13	13	>SPAC17C9.03|tif471|I|translation initiation factor eIF4G	1	13	13	13	11	9	11	9	11	9	14.9	14.9	14.9	154.03	1403	1403	0	36.06	By MS/MS	By MS/MS	12	10	161850000	85766000	76085000	73441000	82641000	11	8	19				155	575;665;1054;1104;1991;2431;3676;3748;3883;6470;7204;7341;7663	True;True;True;True;True;True;True;True;True;True;True;True;True	598;693;1107;1158;2091;2544;3842;3920;4062;6825;7591;7733;8070	1245;1246;1441;2249;2351;2352;4122;4123;5018;7747;7748;7941;8207;8208;14155;14156;15699;15982;15983;16645;16646	1143;1320;2073;2167;2168;3835;3836;4656;7167;7168;7351;7592;7593;13299;13300;14703;14948;14949;15557;15558	1143;1320;2073;2167;3835;4656;7168;7351;7592;13299;14703;14948;15557
SPAC17C9.09c|tim13|I|TIM22	SPAC17C9.09c|tim13|I|TIM22	1	1	1	>SPAC17C9.09c|tim13|I|TIM22 inner membrane protein import complex subunit Tim13 (predicted)	1	1	1	1	1	1	1	1	1	1	14.7	14.7	14.7	10.742	95	95	0	4.2754	By MS/MS	By MS/MS	14.7	14.7	34668000	23127000	11541000	0	11541000	1	1	2				156	6212	TRUE	6555	13566;13567	12743;12744	12743
SPAC17C9.10|stm1|I|G-protein	SPAC17C9.10|stm1|I|G-protein	3	3	3	>SPAC17C9.10|stm1|I|G-protein coupled receptor Stm1	1	3	3	3	3	2	3	2	3	2	10.3	10.3	10.3	30.614	271	271	0	6.3435	By MS/MS	By matching	10.3	7	36879000	27830000	9049400	24343000	10665000	4	0	4				157	1451;6410;6998	True;True;True	1531;6763;7377	3020;14001;14002;15291;15292;15293	2797;13148;14326;14327	2797;13148;14326
SPAC17C9.12|scs22|I|VAP	SPAC17C9.12|scs22|I|VAP	2	2	2	>SPAC17C9.12|scs22|I|VAP family protein Scs22	1	2	2	2	2	2	2	2	2	2	12.5	12.5	12.5	34.005	319	319	0	16.501	By MS/MS	By MS/MS	12.5	12.5	47723000	18053000	29670000	16735000	29773000	2	3	5				158	2504;6007	True;True	2620;6334	5236;5237;13085;13086	4865;4866;4867;12297;12298	4866;12297
SPAC17D4.01|pex7|I|peroxin-7	SPAC17D4.01|pex7|I|peroxin-7	11	11	11	>SPAC17D4.01|pex7|I|peroxin-7 (predicted)	1	11	11	11	11	9	11	9	11	9	49.4	49.4	49.4	34.588	308	308	0	126	By MS/MS	By MS/MS	49.4	43.5	238490000	142060000	96434000	126440000	102490000	9	9	18				159	2539;3224;3325;3601;4156;4435;5456;7273;7847;7858;8173	True;True;True;True;True;True;True;True;True;True;True	2655;3364;3470;3759;4350;4647;5702;7663;8267;8278;8610	5304;5305;6790;6791;6995;6996;7585;7586;8831;8832;9398;9399;9400;9401;11435;11436;11437;11438;15842;15843;17141;17162;17163;17854	4929;4930;6300;6489;6490;7015;7016;8142;8143;8679;8680;8681;10562;10563;10564;14827;14828;16022;16038;16039;16688	4930;6300;6490;7016;8143;8679;10562;14828;16022;16038;16688
SPAC17D4.03c|cis4|I|cation	SPAC17D4.03c|cis4|I|cation	6	6	6	>SPAC17D4.03c|cis4|I|cation diffusion family zinc transmembrane transporter Cis4	1	6	6	6	5	5	5	5	5	5	7.2	7.2	7.2	82.739	732	732	0	9.5237	By MS/MS	By MS/MS	6.3	6.1	40944000	19198000	21746000	16741000	22912000	5	2	7				160	1106;2141;3704;5193;5577;8259	True;True;True;True;True;True	1160;2245;3871;5434;5864;8701	2354;2355;4410;7800;7801;10882;10883;11942;11943;18028	2170;2171;4089;7215;7216;10046;11081;16856	2170;4089;7216;10046;11081;16856
SPAC17G6.08|pep7|I|prevacuole/endosomal	SPAC17G6.08|pep7|I|prevacuole/endosomal	1	1	1	>SPAC17G6.08|pep7|I|prevacuole/endosomal FYVE tethering component Pep7 (predicted)	1	1	1	1	1	1	1	1	1	1	1.7	1.7	1.7	62.434	536	536	0	5.6318	By MS/MS	By MS/MS	1.7	1.7	3933900	2316900	1617000	0	1617000	1	2	3				161	2976	TRUE	3109	6254;6255	5788;5789;5790	5789
SPAC17G6.10|ssr1|I|SWI/SNF	SPAC17G6.10|ssr1|I|SWI/SNF	5	5	5	>SPAC17G6.10|ssr1|I|SWI/SNF and RSC complex subunit Ssr1	1	5	5	5	5	4	5	4	5	4	11.8	11.8	11.8	59.638	527	527	0	11.061	By MS/MS	By MS/MS	11.8	9.7	36706000	23013000	13693000	19386000	15773000	5	2	7				162	768;2065;3403;5934;7819	True;True;True;True;True	805;2165;3551;6255;8236	1658;4262;4263;7146;7147;12918;12919;17041;17042	1524;3960;3961;6619;6620;12138;12139;15937	1524;3960;6619;12138;15937
SPAC17G6.12|cul1|I|cullin	SPAC17G6.12|cul1|I|cullin	1	1	1	>SPAC17G6.12|cul1|I|cullin 1	1	1	1	1	1	1	1	1	1	1	1.2	1.2	1.2	89.425	767	767	0.00079428	2.0122	By MS/MS	By MS/MS	1.2	1.2	10992000	5424200	5567900	0	5567900	1	1	2				163	4829	TRUE	5052	10156;10157	9383;9384	9383
SPAC17G6.13|slt1|I|Schizosaccharomyces	SPAC17G6.13|slt1|I|Schizosaccharomyces	13	13	13	>SPAC17G6.13|slt1|I|Schizosaccharomyces specific protein Slt1	1	13	13	13	11	10	11	10	11	10	36	36	36	49.136	433	433	0	114.35	By MS/MS	By MS/MS	35.3	30.3	1149100000	736640000	412460000	551700000	455350000	16	15	31				164	159;291;688;2178;2357;3064;3945;5094;5095;6220;6403;6494;7561	True;True;True;True;True;True;True;True;True;True;True;True;True	168;305;716;717;2286;2467;3201;4124;5332;5333;6563;6756;6849;7961	405;658;659;660;661;1482;1483;1484;1485;1486;1487;1488;4494;4857;4858;4859;4860;6473;8333;10685;10686;10687;10688;10689;13582;13583;13584;13585;13985;13986;14197;16401;16402;16403;16404	375;605;606;607;608;1358;1359;1360;1361;1362;1363;1364;4166;4500;4501;4502;4503;6006;7706;9866;9867;9868;9869;9870;12757;12758;12759;13133;13134;13335;15331;15332;15333	375;605;1358;4166;4503;6006;7706;9868;9870;12757;13134;13335;15331	76	25
SPAC17G6.14c|uap56|I|TREX	SPAC17G6.14c|uap56|I|TREX	5	5	5	>SPAC17G6.14c|uap56|I|TREX complex subunit, ATP-dependent RNA helicase Uap56	1	5	5	5	5	4	5	4	5	4	12.4	12.4	12.4	49.231	434	434	0	11.928	By MS/MS	By MS/MS	12.4	10.8	43034000	21095000	21938000	15569000	26046000	4	5	9				165	1031;1520;3246;7158;8538	True;True;True;True;True	1084;1602;3388;7540;9000	2205;3154;3155;6844;6845;15604;15605;15606;18615;18616	2034;2924;2925;6351;6352;14611;14612;14613;17390	2034;2925;6352;14611;17390
SPAC17G6.16c|ysh1|I|mRNA	SPAC17G6.16c|ysh1|I|mRNA	6	6	6	>SPAC17G6.16c|ysh1|I|mRNA cleavage and polyadenylation specificity factor complex endoribonuclease subunit Ysh1	1	6	6	6	4	6	4	6	4	6	11	11	11	85.989	757	757	0	14.059	By MS/MS	By MS/MS	4.9	11	63061000	25530000	37531000	28054000	33290000	3	6	9				166	1392;4839;6580;7401;8765;8909	True;True;True;True;True;True	1466;5063;6938;7795;9232;9381	2893;10174;10175;14381;16107;16108;19064;19065;19362;19363	2669;9401;9402;13493;15061;15062;17808;18080;18081	2669;9402;13493;15061;17808;18080
SPAC17G8.01c|trl1|I|tRNA	SPAC17G8.01c|trl1|I|tRNA	7	7	7	>SPAC17G8.01c|trl1|I|tRNA ligase Trl1 (predicted)	1	7	7	7	7	3	7	3	7	3	10.9	10.9	10.9	90.342	787	787	0	11.85	By MS/MS	By MS/MS	10.9	2.8	38834000	30545000	8288600	21614000	15165000	5	2	7				167	292;1916;2267;2888;3912;7329;9204	True;True;True;True;True;True;True	306;2013;2376;3017;4091;7720;9689	662;663;3916;4696;6065;8263;8264;15951;20046;20047	609;610;3638;4362;5618;7642;14920;18808	610;3638;4362;5618;7642;14920;18808
SPAC17G8.06c|SPAC17G8.06c|I|dihydroxy-acid	SPAC17G8.06c|SPAC17G8.06c|I|dihydroxy-acid	1	1	1	>SPAC17G8.06c|SPAC17G8.06c|I|dihydroxy-acid dehydratase (predicted)	1	1	1	1	1	1	1	1	1	1	1.7	1.7	1.7	63.926	598	598	0	3.5643	By MS/MS	By MS/MS	1.7	1.7	14451000	7568600	6882400	0	6882400	1	1	2				168	3485	TRUE	3638	7336;7337	6792;6793	6792
SPAC17G8.07|yaf9|I|YEATS	SPAC17G8.07|yaf9|I|YEATS	2	2	2	>SPAC17G8.07|yaf9|I|YEATS family histone acetyltransferase subunit Yaf9	1	2	2	2	2	1	2	1	2	1	10.1	10.1	10.1	24.946	217	217	0	4.0306	By MS/MS	By MS/MS	10.1	4.1	7739700	6545900	1193900	6105600	0	2	1	3				169	494;3366	True;True	515;3514	1096;1097;7077	1007;1008;6561	1008;6561
SPAC17G8.08c|SPAC17G8.08c|I|human	SPAC17G8.08c|SPAC17G8.08c|I|human	1	1	1	>SPAC17G8.08c|SPAC17G8.08c|I|human TMEM165 homolog, implicated in calcium tranport	1	1	1	1	1	1	1	1	1	1	9.1	9.1	9.1	31.302	287	287	0	9.6809	By matching	By MS/MS	9.1	9.1	22602000	9143000	13459000	0	13459000	0	1	1				170	5688	TRUE	5999	12376;12377	11645	11645
SPAC17G8.14c|pck1|I|protein	SPAC17G8.14c|pck1|I|protein	2	2	2	>SPAC17G8.14c|pck1|I|protein kinase C (PKC)-like Pck1	1	2	2	2	1	2	1	2	1	2	3.6	3.6	3.6	111.78	988	988	0	6.6849	By MS/MS	By MS/MS	1.6	3.6	13094000	4364800	8728900	0	8728900	1	2	3				171	5798;6651	True;True	6113;7011	12637;14531;14532	11879;13623;13624	11879;13624
SPAC17H9.04c|nrp1|I|RNA-binding	SPAC17H9.04c|nrp1|I|RNA-binding	10	10	10	>SPAC17H9.04c|nrp1|I|RNA-binding protein	1	10	10	10	8	9	8	9	8	9	21.5	21.5	21.5	66.396	604	604	0	46.33	By MS/MS	By MS/MS	16.1	19.4	258120000	101150000	156970000	92476000	150820000	8	10	18				172	296;554;624;2485;4281;4380;4434;5520;5551;6792	True;True;True;True;True;True;True;True;True;True	310;575;649;2600;4482;4589;4646;5781;5782;5827;7163	670;1202;1203;1349;1350;5141;9086;9087;9270;9396;9397;11684;11685;11686;11687;11778;11779;14835;14836	618;1103;1104;1232;1233;4762;4763;8379;8380;8550;8677;8678;10823;10824;10825;10826;10827;10828;10907;13911	618;1104;1232;4762;8380;8550;8678;10825;10907;13911	77	150
SPAC17H9.10c|ddb1|I|damaged	SPAC17H9.10c|ddb1|I|damaged	2	2	2	>SPAC17H9.10c|ddb1|I|damaged DNA binding protein Ddb1	1	2	2	2	2	1	2	1	2	1	1.9	1.9	1.9	120.65	1072	1072	0	2.4941	By MS/MS	By matching	1.9	1	9239800	6423600	2816300	5991500	0	1	0	1				173	4350;5958	True;True	4556;6279	9221;12966;12967	8506;12187	8506;12187
SPAC17H9.12c|SPAC17H9.12c|I|mitochondrial	SPAC17H9.12c|SPAC17H9.12c|I|mitochondrial	1	1	1	>SPAC17H9.12c|SPAC17H9.12c|I|mitochondrial cytochrome c-heme linkage protein Cyc2 (predicted)	1	1	1	1	1	0	1	0	1	0	5.3	5.3	5.3	29.375	266	266	0	2.4249	By MS/MS	By matching	5.3	0	0	0	0	0	0	1	0	1				174	4186	TRUE	4382	8895	8196	8196
SPAC17H9.13c|SPAC17H9.13c|I|glutamate	SPAC17H9.13c|SPAC17H9.13c|I|glutamate	16	16	16	>SPAC17H9.13c|SPAC17H9.13c|I|glutamate 5-kinase (predicted)	1	16	16	16	15	12	15	12	15	12	55.5	55.5	55.5	43.933	402	402	0	91.634	By MS/MS	By MS/MS	50.7	40.8	554600000	249540000	305060000	221140000	316670000	13	14	27				175	225;502;1182;1278;2723;2937;4519;4690;5164;6154;6217;6398;6980;7213;7641;8056	True;True;True;True;True;True;True;True;True;True;True;True;True;True;True;True	237;523;1244;1345;2845;3066;4735;4910;5405;6492;6560;6751;7359;7600;8047;8488	529;530;1111;1112;1113;1114;2520;2687;5692;5693;6160;6161;9573;9906;9907;10833;10834;13445;13446;13574;13575;13576;13577;13975;13976;15250;15716;15717;16587;17574;17575	492;493;1021;1022;1023;2325;2477;5270;5271;5705;5706;8839;9153;9154;9998;9999;12635;12636;12751;12752;12753;13125;13126;14283;14718;14719;15506;16421;16422	492;1023;2325;2477;5271;5706;8839;9154;9999;12636;12751;13126;14283;14718;15506;16421	78	63
SPAC17H9.14c|pdi2|I|protein	SPAC17H9.14c|pdi2|I|protein	6	6	6	>SPAC17H9.14c|pdi2|I|protein disulfide isomerase	1	6	6	6	6	6	6	6	6	6	18.7	18.7	18.7	40.691	359	359	0	21.583	By MS/MS	By MS/MS	18.7	18.7	89966000	51299000	38667000	52190000	34326000	6	5	11				176	3567;4284;4571;4981;7004;8235	True;True;True;True;True;True	3725;4485;4790;5214;7383;8677	7519;7520;9091;9092;9678;9679;10465;10466;15302;15303;17986;17987	6956;6957;8383;8935;8936;9665;9666;14336;14337;16817;16818	6957;8383;8936;9666;14336;16818
SPAC1805.05|cki3|I|serine/threonine;SPBP35G2.05c|cki2|II|serine/threonine;SPBC1347.06c|cki1|II|serine/threonine	SPAC1805.05|cki3|I|serine/threonine;SPBP35G2.05c|cki2|II|serine/threonine;SPBC1347.06c|cki1|II|serine/threonine	4;2;2	3;1;1	3;1;1	>SPAC1805.05|cki3|I|serine/threonine protein kinase Cki3;>SPBP35G2.05c|cki2|II|serine/threonine protein kinase Cki2;>SPBC1347.06c|cki1|II|serine/threonine protein kinase Cki1	3	4	3	3	3	4	2	3	2	3	9.8	7.7	7.7	50.214	439	439;435;446	0	8.3287	By MS/MS	By MS/MS	7.5	9.8	31056000	12555000	18501000	14765000	15446000	1	4	5				177	1016;2725;7008;9211	True;False;True;True	1067;2847;7387;9696	2176;2177;5696;5697;15312;15313;20061	2006;2007;5273;5274;14344;18821;18822	2006;5274;14344;18822
SPAC1805.06c|hem2|I|porphobilinogen	SPAC1805.06c|hem2|I|porphobilinogen	2	2	2	>SPAC1805.06c|hem2|I|porphobilinogen synthase Hem2 (predicted)	1	2	2	2	2	2	2	2	2	2	6.1	6.1	6.1	36.12	329	329	0	8.1599	By MS/MS	By MS/MS	6.1	6.1	13426000	6669700	6755900	6259300	6717700	2	2	4				178	1838;4389	True;True	1930;4598	3744;3745;9285;9286	3465;3466;8564;8565	3466;8564
SPAC1805.08|dlc1|I|dynein	SPAC1805.08|dlc1|I|dynein	1	1	1	>SPAC1805.08|dlc1|I|dynein light chain Dlc1	1	1	1	1	0	1	0	1	0	1	9	9	9	12.254	111	111	0.0052161	1.5208	By matching	By MS/MS	0	9	4928700	0	4928700	0	4928700	0	1	1				179	8898	TRUE	9370	19344	18063	18063
SPAC1805.09c|fmt1|I|mitochondrial	SPAC1805.09c|fmt1|I|mitochondrial	1	1	1	>SPAC1805.09c|fmt1|I|mitochondrial methionyl-tRNA formyltransferase Fmt1 (predicted)	1	1	1	1	1	1	1	1	1	1	4.7	4.7	4.7	38.041	340	340	0.00081169	2.156	By MS/MS	By matching	4.7	4.7	29197000	17599000	11598000	0	11598000	1	0	1				180	4248	TRUE	4448	9021;9022	8319	8319
SPAC1805.13|rpl14|I|60S	SPAC1805.13|rpl14|I|60S	2	2	2	>SPAC1805.13|rpl14|I|60S ribosomal protein L14 (predicted)	1	2	2	2	2	1	2	1	2	1	14.9	14.9	14.9	15.21	134	134	0.00078864	1.9388	By MS/MS	By MS/MS	14.9	6	15528000	12657000	2871700	11805000	0	1	1	2				181	429;8855	True;True	447;9325	952;19246;19247	876;17978	876;17978
SPAC1805.15c|pub2|I|HECT-type;SPBC16E9.11c|pub3|II|HECT-type	SPAC1805.15c|pub2|I|HECT-type;SPBC16E9.11c|pub3|II|HECT-type	1;1	1;1	1;1	>SPAC1805.15c|pub2|I|HECT-type ubiquitin-protein ligase E3 Pub2;>SPBC16E9.11c|pub3|II|HECT-type ubiquitin-protein ligase E3 Pub3 (predicted)	2	1	1	1	1	1	1	1	1	1	1.5	1.5	1.5	77.195	671	671;786	0	2.3808	By matching	By MS/MS	1.5	1.5	5358500	1457000	3901500	0	3901500	0	0	0				182	4866	TRUE	5091	10228;10229	9451	9451
SPAC1805.16c|SPAC1805.16c|I|purine	SPAC1805.16c|SPAC1805.16c|I|purine	16	16	16	>SPAC1805.16c|SPAC1805.16c|I|purine nucleoside phosphorylase (predicted)	1	16	16	16	14	15	14	15	14	15	59.7	59.7	59.7	34.238	315	315	0	98.131	By MS/MS	By MS/MS	57.1	55.9	929030000	446420000	482610000	359470000	459080000	22	21	43				183	987;1134;1786;2135;2136;2339;2675;5453;6629;7510;7676;7809;8268;8409;8588;9105	True;True;True;True;True;True;True;True;True;True;True;True;True;True;True;True	1037;1038;1191;1192;1877;2239;2240;2449;2794;5699;6987;6988;7907;7908;8083;8225;8226;8710;8711;8863;9050;9051;9588	2118;2119;2120;2121;2122;2410;2411;3639;3640;3641;3642;4399;4400;4401;4820;4821;4822;5593;5594;5595;5596;11429;11430;14479;14480;14481;14482;16311;16312;16313;16314;16315;16316;16695;16696;17019;17020;17021;17022;18046;18047;18364;18365;18703;18704;18705;18706;19858;19859;19860	1949;1950;1951;1952;1953;2218;2219;3368;3369;3370;3371;4079;4080;4081;4470;4471;4472;5187;5188;5189;10557;10558;13582;13583;13584;15248;15249;15250;15251;15252;15607;15608;15918;15919;15920;15921;16872;16873;17163;17164;17469;17470;17471;17472;18638;18639;18640	1951;2219;3368;4079;4080;4472;5189;10558;13582;15251;15607;15918;16872;17164;17469;18639	79;80;81;82	98;163;283;307
SPAC1805.17|crm1|I|importin	SPAC1805.17|crm1|I|importin	20	20	20	>SPAC1805.17|crm1|I|importin family nuclear export receptor Crm1	1	20	20	20	20	5	20	5	20	5	25.4	25.4	25.4	123.57	1078	1078	0	68.316	By MS/MS	By MS/MS	25.4	4.7	306850000	290740000	16107000	270040000	17256000	19	3	22				184	10;333;764;771;943;950;1397;1533;2066;2095;2936;3242;4364;4885;5122;6109;6120;6221;8796;9109	True;True;True;True;True;True;True;True;True;True;True;True;True;True;True;True;True;True;True;True	10;349;801;808;991;999;1471;1615;2166;2197;3065;3384;4571;5110;5362;6443;6455;6564;9264;9592	21;22;740;1652;1653;1663;2026;2041;2908;3185;4264;4265;4323;4324;6158;6159;6839;9244;10264;10744;13332;13370;13586;19126;19866;19867	19;20;680;1518;1519;1529;1868;1880;2687;2949;3962;4016;4017;5703;5704;6346;8528;9482;9918;12527;12566;12760;17863;18646	20;680;1519;1529;1868;1880;2687;2949;3962;4017;5704;6346;8528;9482;9918;12527;12566;12760;17863;18646
SPAC1834.01|sup45|I|translation	SPAC1834.01|sup45|I|translation	4	4	4	>SPAC1834.01|sup45|I|translation release factor eRF1	1	4	4	4	4	3	4	3	4	3	9.2	9.2	9.2	48.803	433	433	0	14.536	By MS/MS	By MS/MS	9.2	6.5	46913000	28465000	18448000	26550000	0	3	2	5				185	2255;2419;5246;7563	True;True;True;True	2363;2532;5488;7963	4670;4671;4995;4996;10985;10986;16407	4338;4636;4637;10139;10140;15335	4338;4636;10139;15335
SPAC1834.02|aro1|I|pentafunctional	SPAC1834.02|aro1|I|pentafunctional	29	29	29	>SPAC1834.02|aro1|I|pentafunctional aromatic polypeptide Aro1 (predicted)	1	29	29	29	24	21	24	21	24	21	22.7	22.7	22.7	173.78	1573	1573	0	76.692	By MS/MS	By MS/MS	17.7	16.3	328840000	177910000	150930000	150370000	166500000	21	16	37				186	25;837;1256;1427;1578;1907;1914;2088;3178;3287;3478;4101;4311;5272;5361;5655;5859;5886;7116;7272;7285;7294;7306;7450;7611;8446;8465;8636;8844	True;True;True;True;True;True;True;True;True;True;True;True;True;True;True;True;True;True;True;True;True;True;True;True;True;True;True;True;True	25;875;1323;1503;1663;2002;2009;2189;3317;3431;3631;4292;4516;5514;5604;5965;6174;6202;7498;7662;7675;7684;7696;7845;8016;8903;8922;9100;9314	52;53;1793;2649;2955;2956;3272;3894;3895;3906;4310;4311;6705;6706;6925;7314;7315;8708;9157;11032;11204;12303;12304;12763;12764;12813;12814;15525;15526;15841;15865;15881;15882;15903;15904;16196;16532;16533;18435;18436;18469;18470;18804;18805;19223	45;46;1644;2440;2732;3027;3616;3617;3628;4003;4004;6218;6219;6425;6772;6773;8041;8444;10179;10340;11579;11580;11996;12044;14537;14538;14826;14845;14862;14863;14882;14883;15142;15143;15456;15457;17229;17256;17257;17566;17567;17955	45;1644;2440;2732;3027;3616;3628;4004;6218;6425;6773;8041;8444;10179;10340;11580;11996;12044;14538;14826;14845;14862;14883;15143;15456;17229;17256;17567;17955
SPBC8D2.03c|hhf2|II|histone;SPBC1105.12|hhf3|II|histone;SPAC1834.03c|hhf1|I|histone	SPBC8D2.03c|hhf2|II|histone;SPBC1105.12|hhf3|II|histone;SPAC1834.03c|hhf1|I|histone	2;2;2	2;2;2	2;2;2	>SPBC8D2.03c|hhf2|II|histone H4 h4.2;>SPBC1105.12|hhf3|II|histone H4 h4.3;>SPAC1834.03c|hhf1|I|histone H4 h4.1	3	2	2	2	2	2	2	2	2	2	19.4	19.4	19.4	11.423	103	103;103;103	0	4.3618	By MS/MS	By MS/MS	19.4	19.4	19272000	10232000	9040000	9707300	8876600	2	1	3				187	1152;4463	True;True	1213;4675	2456;2457;9450;9451	2264;8727;8728	2264;8727
SPBC8D2.04|hht2|II|histone;SPBC1105.11c|hht3|II|histone;SPAC1834.04|hht1|I|histone	SPBC8D2.04|hht2|II|histone;SPBC1105.11c|hht3|II|histone;SPAC1834.04|hht1|I|histone	1;1;1	1;1;1	1;1;1	>SPBC8D2.04|hht2|II|histone H3 h3.2;>SPBC1105.11c|hht3|II|histone H3 h3.3;>SPAC1834.04|hht1|I|histone H3 h3.1	3	1	1	1	1	0	1	0	1	0	5.1	5.1	5.1	15.357	136	136;136;136	0.004481	1.5345	By MS/MS	By matching	5.1	0	5611500	5611500	0	5234100	0	1	0	1				188	7297	TRUE	7687	15887	14867	14867
SPAC1834.05|alg9|I|mannosyltransferase	SPAC1834.05|alg9|I|mannosyltransferase	2	2	2	>SPAC1834.05|alg9|I|mannosyltransferase complex subunit Alg9 (predicted)	1	2	2	2	2	1	2	1	2	1	2.9	2.9	2.9	66.27	577	577	0	3.7015	By MS/MS	By MS/MS	2.9	1.7	12720000	5709600	7010300	5325600	0	1	1	2				189	150;3260	True;True	159;3402	385;386;6867	355;356;6372	356;6372
SPAC1834.08|mak1|I|histidine	SPAC1834.08|mak1|I|histidine	22	22	22	>SPAC1834.08|mak1|I|histidine kinase Mak1	1	22	22	22	20	17	20	17	20	17	17.4	17.4	17.4	184.58	1639	1639	0	54.843	By MS/MS	By MS/MS	15.9	13.2	286680000	148200000	138480000	139310000	137400000	15	14	29				190	194;566;689;915;1919;2197;2249;2300;3025;3355;3425;4187;5317;6457;7061;7126;7257;7628;8345;8576;8719;9336	True;True;True;True;True;True;True;True;True;True;True;True;True;True;True;True;True;True;True;True;True;True	206;589;718;961;2016;2305;2357;2409;3160;3503;3576;4383;5560;6812;7441;7508;7645;8033;8792;9038;9184;9826	469;470;471;472;1229;1230;1489;1490;1973;3920;4529;4530;4658;4659;4747;4748;6361;6362;6363;7058;7199;7200;8896;11123;14088;14089;15414;15544;15545;15805;15806;16564;16565;18216;18217;18684;18975;18976;20344;20345	436;437;438;439;1129;1130;1365;1817;3642;4195;4196;4328;4408;4409;5892;5893;5894;6546;6666;6667;8197;10263;13223;13224;14436;14553;14554;14796;14797;15485;17030;17031;17452;17721;19105	438;1130;1365;1817;3642;4196;4328;4408;5892;6546;6666;8197;10263;13224;14436;14553;14796;15485;17030;17452;17721;19105
SPAC1834.11c|sec18|I|secretory	SPAC1834.11c|sec18|I|secretory	7	6	6	>SPAC1834.11c|sec18|I|secretory pathway protein Sec18 (predicted)	1	7	6	6	6	7	5	6	5	6	11	9.5	9.5	87.553	792	792	0	14.643	By MS/MS	By MS/MS	9.5	11	60607000	26033000	34574000	27796000	31060000	3	2	5				191	2529;3452;4804;5111;5413;5723;7168	False;True;True;True;True;True;True	2645;3604;5025;5350;5657;6036;7550	5284;5285;7258;7259;10104;10105;10717;10718;11346;11347;12483;15626;15627	4911;4912;6720;6721;9336;9893;10476;11739;14632;14633	4911;6721;9336;9893;10476;11739;14633
SPAC1851.03|ckb1|I|CK2	SPAC1851.03|ckb1|I|CK2	1	1	1	>SPAC1851.03|ckb1|I|CK2 family regulatory subunit Ckb1	1	1	1	1	1	1	1	1	1	1	3.9	3.9	3.9	26.677	231	231	0	4.1674	By MS/MS	By MS/MS	3.9	3.9	8785400	5058300	3727100	0	3727100	1	1	2				192	3046	TRUE	3182	6411;6412	5936;5937	5937
SPAC18B11.11|SPAC18B11.11|I|GTPase	SPAC18B11.11|SPAC18B11.11|I|GTPase	1	1	1	>SPAC18B11.11|SPAC18B11.11|I|GTPase activating protein (predicted)	1	1	1	1	1	0	1	0	1	0	0.6	0.6	0.6	149.19	1294	1294	0.0015576	1.8028	By MS/MS	By matching	0.6	0	1017200	1017200	0	948780	0	1	0	1				193	8258	TRUE	8700	18027	16855	16855
SPAC18G6.03|ypt3|I|GTPase	SPAC18G6.03|ypt3|I|GTPase	1	1	1	>SPAC18G6.03|ypt3|I|GTPase Ypt3	1	1	1	1	1	0	1	0	1	0	6.1	6.1	6.1	23.861	214	214	0	3.6843	By MS/MS	By matching	6.1	0	0	0	0	0	0	1	0	1				194	2370	TRUE	2482	4886	4527	4527
SPAC18G6.04c|shm2|I|serine	SPAC18G6.04c|shm2|I|serine	18	17	17	>SPAC18G6.04c|shm2|I|serine hydroxymethyltransferase Shm2 (predicted)	1	18	17	17	17	14	16	13	16	13	45.5	43.6	43.6	53.978	488	488	0	97.014	By MS/MS	By MS/MS	40	36.9	468780000	249970000	218810000	161030000	244280000	16	12	28				195	23;386;754;1714;1759;2360;2406;3525;4937;5408;5409;6314;7841;8380;8752;8878;9268;9354	True;True;True;True;True;True;True;True;True;True;True;True;True;True;True;True;False;True	23;403;788;1803;1850;2471;2519;3680;5163;5164;5652;5653;6661;8260;8831;9218;9350;9757;9844	48;49;854;855;1623;1624;3506;3592;4866;4867;4965;7432;7433;7434;7435;10363;10364;10365;10366;11336;11337;11338;11339;11340;11341;13784;13785;17125;17126;18300;18301;19038;19039;19303;20187;20188;20376	43;785;786;1490;3247;3329;4509;4510;4607;6880;6881;6882;9573;9574;9575;10466;10467;10468;10469;10470;10471;12942;12943;16009;16010;17104;17105;17783;17784;18029;18948;18949;19133	43;786;1490;3247;3329;4509;4607;6880;9574;10467;10468;12942;16009;17105;17783;18029;18949;19133	83;84	140;147
SPAC18G6.05c|gcn1|I|translation	SPAC18G6.05c|gcn1|I|translation	19	19	19	>SPAC18G6.05c|gcn1|I|translation elongation regulator Gcn1 (predicted)	1	19	19	19	16	17	16	17	16	17	9.1	9.1	9.1	297.33	2670	2670	0	52.57	By MS/MS	By MS/MS	7.4	8	153270000	69504000	83764000	61580000	87013000	10	10	20				196	1619;2341;3766;4388;5074;5149;5462;6370;6663;6691;6983;7028;7152;7359;7840;8117;8157;8543;8640	True;True;True;True;True;True;True;True;True;True;True;True;True;True;True;True;True;True;True	1706;2451;3938;4597;5311;5389;5708;6721;7023;7055;7362;7407;7534;7752;8259;8552;8594;9005;9104	3348;4825;4826;7968;7969;9284;10645;10646;10796;10797;11451;11452;13920;13921;14551;14552;14624;14625;15258;15346;15347;15588;15589;16018;16019;17123;17124;17707;17708;17825;18624;18625;18813;18814	3099;4474;7376;7377;8563;9832;9833;9964;10577;10578;13077;13640;13641;13714;14291;14376;14377;14595;14596;14982;14983;16007;16008;16542;16543;16663;17398;17399;17575;17576	3099;4474;7376;8563;9832;9964;10577;13077;13641;13714;14291;14377;14596;14983;16007;16543;16663;17398;17576
SPAC18G6.14c|rps7|I|40S	SPAC18G6.14c|rps7|I|40S	7	7	7	>SPAC18G6.14c|rps7|I|40S ribosomal protein S7 (predicted)	1	7	7	7	6	7	6	7	6	7	40	40	40	21.947	195	195	0	63.147	By MS/MS	By MS/MS	39.5	40	284110000	129030000	155090000	127550000	147880000	6	8	14				197	350;1583;3135;4551;6087;7788;7789	True;True;True;True;True;True;True	367;1668;3273;4770;6420;8202;8203	783;784;3278;3279;6617;6618;9637;9638;9639;9640;13291;13292;16958;16959;16960	723;3033;3034;6133;6134;8898;8899;8900;8901;12487;12488;15853;15854;15855;15856	723;3034;6133;8901;12487;15854;15856
SPAC1952.02|tma23|I|ribosome	SPAC1952.02|tma23|I|ribosome	1	1	1	>SPAC1952.02|tma23|I|ribosome biogenesis protein Tma23 (predicted)	1	1	1	1	1	0	1	0	1	0	4.5	4.5	4.5	22.832	202	202	0.009915	1.167	By MS/MS	By matching	4.5	0	0	0	0	0	0	1	0	1				198	4332	TRUE	4537	9191	8477	8477
SPAC1952.06c|SPAC1952.06c|I|spliceosomal	SPAC1952.06c|SPAC1952.06c|I|spliceosomal	1	1	1	>SPAC1952.06c|SPAC1952.06c|I|spliceosomal complex subunit (predicted)	1	1	1	1	1	1	1	1	1	1	1.2	1.2	1.2	64.589	564	564	0.0045181	1.5709	By MS/MS	By MS/MS	1.2	1.2	17922000	8283800	9638200	0	9638200	1	1	2				199	1909	TRUE	2004	3898;3899	3620;3621	3620
SPAC1952.09c|SPAC1952.09c|I|acetyl-CoA	SPAC1952.09c|SPAC1952.09c|I|acetyl-CoA	1	1	1	>SPAC1952.09c|SPAC1952.09c|I|acetyl-CoA hydrolase (predicted)	1	1	1	1	1	1	1	1	1	1	2.7	2.7	2.7	57.915	521	521	0	5.9084	By MS/MS	By MS/MS	2.7	2.7	3035300	0	3035300	0	3035300	1	1	2				200	2349	TRUE	2459	4842;4843	4490;4491	4491
SPAC1952.11c|ure2|I|ATP-independent,	SPAC1952.11c|ure2|I|ATP-independent,	12	12	12	>SPAC1952.11c|ure2|I|ATP-independent, nickel dependent urease Ure2	1	12	12	12	11	9	11	9	11	9	16.8	16.8	16.8	91.181	835	835	0	38.022	By MS/MS	By MS/MS	16.6	13.5	229860000	122340000	107520000	95505000	126130000	11	5	16				201	636;973;2358;3881;4349;4386;4501;4987;5292;6072;6555;9301	True;True;True;True;True;True;True;True;True;True;True;True	661;1022;2468;4060;4555;4595;4716;5220;5535;6403;6913;9790	1371;1372;2088;2089;4861;8203;8204;9220;9278;9279;9280;9281;9536;9537;10474;10475;11071;11072;13251;14337;20265;20266	1252;1925;4504;7588;7589;8505;8558;8559;8560;8801;8802;9673;9674;10214;12441;13455;19021;19022	1252;1925;4504;7588;8505;8558;8802;9673;10214;12441;13455;19022
SPAC1952.16|rga9|I|RhoGAP,	SPAC1952.16|rga9|I|RhoGAP,	11	11	11	>SPAC1952.16|rga9|I|RhoGAP, GTPase activator towards Rho/Rac/Cdc42-like small GTPases (predicted)	1	11	11	11	11	6	11	6	11	6	20.4	20.4	20.4	76.867	670	670	0	18.352	By MS/MS	By MS/MS	20.4	10	88098000	58247000	29851000	50495000	33685000	8	2	10				202	235;355;4319;4508;4666;4873;6614;6680;7239;7264;8224	True;True;True;True;True;True;True;True;True;True;True	247;372;4524;4724;4886;5098;6972;7044;7626;7652;8666	545;546;794;9169;9170;9552;9861;10242;10243;14446;14447;14599;15768;15769;15820;15821;17968	507;732;8456;8457;8820;9112;9463;9464;13555;13690;14760;14761;14807;16799	507;732;8457;8820;9112;9464;13555;13690;14760;14807;16799
SPAC19A8.04|erg5|I|C-22	SPAC19A8.04|erg5|I|C-22	18	18	18	>SPAC19A8.04|erg5|I|C-22 sterol desaturase Erg5	1	18	18	18	16	17	16	17	16	17	35.9	35.9	35.9	62.27	543	543	0	62.752	By MS/MS	By MS/MS	33.1	33.7	364740000	184620000	180120000	161630000	172660000	14	16	30				203	182;373;635;888;921;1417;2205;2310;2597;2971;3121;3122;3992;5151;8442;8818;8838;9001	True;True;True;True;True;True;True;True;True;True;True;True;True;True;True;True;True;True	193;390;660;928;929;967;968;1492;2313;2419;2714;3103;3258;3259;4175;5391;8899;9286;9308;9476	449;450;828;829;830;1369;1370;1909;1910;1911;1912;1980;1981;1982;1983;2940;2941;4544;4545;4767;4768;5429;5430;6242;6243;6594;6595;6596;8448;10800;10801;18426;18427;19168;19169;19211;19553;19554;19555;19556	418;419;762;763;764;1250;1251;1760;1761;1762;1824;1825;2719;4206;4207;4424;5042;5043;5777;5778;6113;6114;7807;9967;17221;17222;17902;17945;18246;18247;18248;18249	419;763;1250;1761;1824;2719;4207;4424;5042;5778;6113;6114;7807;9967;17222;17902;17945;18247	85;86;87	187;390;412
SPAC19A8.15|trp2|I|tryptophan	SPAC19A8.15|trp2|I|tryptophan	15	15	15	>SPAC19A8.15|trp2|I|tryptophan synthase (predicted)	1	15	15	15	13	13	13	13	13	13	31.7	31.7	31.7	75.436	697	697	0	57.163	By MS/MS	By MS/MS	28.1	28	433590000	211810000	221770000	188020000	231320000	15	13	28				204	128;418;789;872;1050;1351;2381;3411;3440;3448;4784;6180;6264;6265;7591	True;True;True;True;True;True;True;True;True;True;True;True;True;True;True	136;436;826;912;1103;1423;2494;3559;3592;3600;5005;6519;6609;6610;7993	277;926;927;1698;1699;1700;1881;2241;2242;2835;2836;4907;4908;7160;7161;7235;7236;7252;7253;10068;10069;10070;10071;13497;13498;13668;13669;13670;16465	245;852;853;1559;1560;1561;1734;2066;2067;2616;2617;4548;4549;6630;6631;6697;6698;6714;6715;9300;9301;9302;9303;12678;12679;12837;12838;12839;15388	245;853;1560;1734;2067;2617;4549;6630;6698;6714;9300;12679;12837;12839;15388
SPAC19B12.03|bgs3|I|1,3-beta-glucan	SPAC19B12.03|bgs3|I|1,3-beta-glucan	1	1	1	>SPAC19B12.03|bgs3|I|1,3-beta-glucan synthase subunit Bgs3	1	1	1	1	1	1	1	1	1	1	0.4	0.4	0.4	210.83	1826	1826	0.0080233	1.3624	By MS/MS	By matching	0.4	0.4	3668800	1992200	1676600	0	1676600	1	0	1				205	3820	TRUE	3994	8074;8075	7473	7473
SPAC19B12.06c|rbd4|I|rhomboid	SPAC19B12.06c|rbd4|I|rhomboid	1	1	1	>SPAC19B12.06c|rbd4|I|rhomboid family protease associated with COP1 coated vesicle (predicted)	1	1	1	1	1	1	1	1	1	1	3.5	3.5	3.5	28.593	258	258	0	3.4215	By MS/MS	By MS/MS	3.5	3.5	17593000	9273000	8320500	0	8320500	1	1	2				206	4841	TRUE	5065	10178;10179	9405;9406	9405
SPAC19D5.04|ptr1|I|HECT-type	SPAC19D5.04|ptr1|I|HECT-type	2	2	2	>SPAC19D5.04|ptr1|I|HECT-type ubiquitin ligase E3 Ptr1	1	2	2	2	2	2	2	2	2	2	0.5	0.5	0.5	365.03	3227	3227	0.0097155	1.0238	By MS/MS	By MS/MS	0.5	0.5	12088000	3279900	8807800	0	8807800	2	2	4				207	4148;6146	True;True	4341;6484	8809;8810;13429;13430	8123;8124;12621;12622	8124;12622
SPAC19D5.07|uga1|I|4-aminobutyrate	SPAC19D5.07|uga1|I|4-aminobutyrate	2	2	2	>SPAC19D5.07|uga1|I|4-aminobutyrate aminotransferase (GABA transaminase)	1	2	2	2	0	2	0	2	0	2	4.9	4.9	4.9	52.945	474	474	0	3.8044	By matching	By MS/MS	0	4.9	4199600	0	4199600	0	4199600	0	2	2				208	2960;7372	True;True	3091;7766	6213;16057	5752;15017	5752;15017
SPAC19G12.03|cda1|I|chitin	SPAC19G12.03|cda1|I|chitin	2	2	2	>SPAC19G12.03|cda1|I|chitin deacetylase Cda1	1	2	2	2	2	1	2	1	2	1	9.7	9.7	9.7	36.206	320	320	0.0015326	1.668	By MS/MS	By MS/MS	9.7	6.2	12003000	8138200	3864500	7590900	0	1	1	2				209	1124;6919	True;True	1180;7296	2391;2392;15109	2202;14154	2202;14154
SPAC19G12.08|scs7|I|sphingosine	SPAC19G12.08|scs7|I|sphingosine	8	8	8	>SPAC19G12.08|scs7|I|sphingosine hydroxylase Scs7	1	8	8	8	8	8	8	8	8	8	25.9	25.9	25.9	40.229	347	347	0	22.966	By MS/MS	By MS/MS	25.9	25.9	253990000	142480000	111510000	115910000	128490000	6	7	13				210	2720;3094;4110;6219;6699;8031;8032;8231	True;True;True;True;True;True;True;True	2841;3231;4301;6562;7063;8463;8464;8673	5682;5683;6538;6539;8723;8724;8725;8726;13580;13581;14641;14642;17519;17520;17521;17522;17523;17524;17977;17978	5261;6061;8055;8056;8057;8058;12756;13727;13728;16370;16371;16372;16373;16808	5261;6061;8055;12756;13728;16370;16371;16808
SPAC19G12.09|SPAC19G12.09|I|NADH/NADPH	SPAC19G12.09|SPAC19G12.09|I|NADH/NADPH	1	1	1	>SPAC19G12.09|SPAC19G12.09|I|NADH/NADPH dependent indole-3-acetaldehyde reductase	1	1	1	1	1	1	1	1	1	1	3.2	3.2	3.2	31.569	284	284	0	2.8241	By matching	By MS/MS	3.2	3.2	10962000	4665400	6296400	0	6296400	0	1	1				211	3664	TRUE	3830	7723;7724	7145	7145
SPAC19G12.10c|cpy1|I|vacuolar	SPAC19G12.10c|cpy1|I|vacuolar	22	22	22	>SPAC19G12.10c|cpy1|I|vacuolar carboxypeptidase Y	1	22	22	22	21	15	21	15	21	15	29.5	29.5	29.5	114.24	1002	1002	0	105.22	By MS/MS	By MS/MS	26	25.1	860530000	510250000	350280000	424560000	375010000	25	17	42				212	112;940;941;942;1052;1177;1265;1415;1936;1937;2030;2139;2375;2478;2479;2480;2961;4365;6900;7388;7629;8398	True;True;True;True;True;True;True;True;True;True;True;True;True;True;True;True;True;True;True;True;True;True	118;119;988;989;990;1105;1239;1332;1490;2033;2034;2035;2130;2243;2488;2592;2593;2594;3092;4572;7276;7782;8034;8851	244;245;246;2019;2020;2021;2022;2023;2024;2025;2244;2245;2246;2247;2512;2513;2667;2668;2937;2938;3948;3949;3950;3951;3952;3953;3954;4192;4193;4405;4406;4407;4896;4897;5110;5111;5112;5113;5114;6214;9245;15070;15071;15072;16084;16566;16567;18346;18347	216;217;1860;1861;1862;1863;1864;1865;1866;1867;2069;2070;2071;2317;2318;2458;2716;2717;3669;3670;3671;3672;3673;3674;3675;3898;3899;4085;4086;4537;4538;4737;4738;4739;5753;8529;14119;14120;15042;15486;15487;15488;17146;17147	217;1860;1862;1865;2070;2318;2458;2716;3670;3672;3898;4086;4537;4737;4738;4739;5753;8529;14119;15042;15486;17146	88;89	59;525
SPAC19G12.15c|tpp1|I|trehalose-6-phosphate	SPAC19G12.15c|tpp1|I|trehalose-6-phosphate	10	10	10	>SPAC19G12.15c|tpp1|I|trehalose-6-phosphate phosphatase Tpp1	1	10	10	10	9	8	9	8	9	8	15.9	15.9	15.9	93.876	817	817	0	25.239	By MS/MS	By MS/MS	14.9	11.3	140630000	69083000	71551000	60969000	75019000	6	4	10				213	66;342;537;2578;2929;3680;3684;5966;6524;7300	True;True;True;True;True;True;True;True;True;True	67;358;558;2694;3058;3846;3850;6291;6881;7690	137;138;758;759;1171;1172;5387;6143;7753;7759;7760;13007;13008;14270;14271;15891;15892	119;120;699;700;1074;5009;5691;7172;7178;7179;12224;12225;13400;14871;14872	119;699;1074;5009;5691;7172;7178;12224;13400;14871
SPAC1A6.04c|plb1|I|phospholipase	SPAC1A6.04c|plb1|I|phospholipase	3	3	3	>SPAC1A6.04c|plb1|I|phospholipase B homolog Plb1	1	3	3	3	3	3	3	3	3	3	5.5	5.5	5.5	67.118	613	613	0	13.933	By MS/MS	By MS/MS	5.5	5.5	33225000	12672000	20553000	12459000	19914000	2	2	4				214	3675;5432;7315	True;True;True	3841;5678;7705	7745;7746;11390;11391;15923;15924	7165;7166;10522;14900	7165;10522;14900	90	191
SPAC1A6.10|tcd1|I|tRNA	SPAC1A6.10|tcd1|I|tRNA	2	2	2	>SPAC1A6.10|tcd1|I|tRNA threonylcarbamoyladenosine dehydratase Tcd1 (predicted)	1	2	2	2	2	0	2	0	2	0	6.2	6.2	6.2	54.299	485	485	0	5.8671	By MS/MS	By matching	6.2	0	10685000	10685000	0	9966400	0	3	0	3				215	3842;8529	True;True	4019;8988	8124;18591	7513;7514;17367	7513;17367
SPAC1B1.02c|SPAC1B1.02c|I|NAD/NADH	SPAC1B1.02c|SPAC1B1.02c|I|NAD/NADH	14	14	14	>SPAC1B1.02c|SPAC1B1.02c|I|NAD/NADH kinase (predicted)	1	14	14	14	14	11	14	11	14	11	35.9	35.9	35.9	60.708	537	537	0	62.354	By MS/MS	By MS/MS	35.9	26.8	502810000	294700000	208110000	255740000	227250000	13	13	26				216	213;658;1130;1266;2435;3905;5813;5955;6732;6805;7112;7728;8453;9321	True;True;True;True;True;True;True;True;True;True;True;True;True;True	225;686;1187;1333;2548;4084;6128;6276;7102;7176;7493;8141;8910;9810	505;506;1422;1423;1424;1425;2405;2406;2669;2670;5024;5025;8246;8247;12660;12661;12960;14714;14859;14860;15511;15512;15513;15514;15515;15516;16839;16840;18449;20307;20308	468;1304;1305;1306;1307;2213;2214;2459;2460;4661;4662;7627;7628;11899;11900;12181;13796;13931;13932;14523;14524;14525;14526;14527;15742;17239;19057;19058	468;1307;2213;2460;4661;7628;11899;12181;13796;13931;14526;15742;17239;19057
SPAC1B2.03c|SPAC1B2.03c|I|GNS1/SUR4	SPAC1B2.03c|SPAC1B2.03c|I|GNS1/SUR4	3	3	3	>SPAC1B2.03c|SPAC1B2.03c|I|GNS1/SUR4 family protein (predicted)	1	3	3	3	3	2	3	2	3	2	16.8	16.8	16.8	38.337	334	334	0	25.864	By MS/MS	By MS/MS	16.8	12.3	139930000	84532000	55398000	67194000	67051000	3	3	6				217	92;5418;7675	True;True;True	96;5662;8082	195;196;197;11359;11360;16694	169;170;171;10490;10491;15606	169;10490;15606
SPAC1B3.01c|SPAC1B3.01c|I|uracil	SPAC1B3.01c|SPAC1B3.01c|I|uracil	2	2	2	>SPAC1B3.01c|SPAC1B3.01c|I|uracil phosphoribosyltransferase (predicted)	1	2	2	2	2	1	2	1	2	1	11.4	11.4	11.4	24.466	219	219	0	5.491	By MS/MS	By MS/MS	11.4	7.3	15526000	7612100	7913600	0	7913600	1	1	2				218	4699;6749	True;True	4919;7120	9921;9922;14755	9166;13836	9166;13836
SPAC1B3.03c|wis2|I|cyclophilin	SPAC1B3.03c|wis2|I|cyclophilin	5	5	5	>SPAC1B3.03c|wis2|I|cyclophilin family peptidyl-prolyl cis-trans isomerase Wis2	1	5	5	5	3	3	3	3	3	3	17.4	17.4	17.4	40.161	356	356	0	14.345	By MS/MS	By MS/MS	10.7	9.3	35449000	27110000	8338700	25286000	0	1	1	2				219	1700;3720;4494;5703;6227	True;True;True;True;True	1788;3887;4709;6016;6570	3484;7837;9521;9522;12438;13596	3227;7248;8790;11701;12770	3227;7248;8790;11701;12770
SPAC1B3.05|not3|I|CCR4-Not	SPAC1B3.05|not3|I|CCR4-Not	2	2	2	>SPAC1B3.05|not3|I|CCR4-Not complex subunit Not3/5 (predicted)	1	2	2	2	2	1	2	1	2	1	2.7	2.7	2.7	72.759	640	640	0.00079177	1.9965	By MS/MS	By matching	2.7	1.1	2986500	1619700	1366800	0	1366800	1	0	1				220	5191;9309	True;True	5432;9798	10879;20282;20283	10044;19037	10044;19037
SPAC1B3.08|SPAC1B3.08|I|COP9	SPAC1B3.08|SPAC1B3.08|I|COP9	1	1	1	>SPAC1B3.08|SPAC1B3.08|I|COP9 signalosome complex subunit 12 (predicted)	1	1	1	1	1	0	1	0	1	0	3.1	3.1	3.1	48.044	423	423	0.001542	1.7079	By MS/MS	By matching	3.1	0	0	0	0	0	0	1	0	1				221	2133	TRUE	2237	4396	4076	4076
SPAC1B3.13|nan1|I|U3	SPAC1B3.13|nan1|I|U3	2	2	2	>SPAC1B3.13|nan1|I|U3 snoRNP-associated protein Nan1 (predicted)	1	2	2	2	2	2	2	2	2	2	2.4	2.4	2.4	88.937	806	806	0	4.1352	By MS/MS	By MS/MS	2.4	2.4	18203000	9372400	8830900	8698700	8874200	1	2	3				222	302;4641	True;True	316;4861	678;679;9810;9811	625;626;9059	625;9059
SPAC1B3.14|vma3|I|V-type	SPAC1B3.14|vma3|I|V-type	1	1	1	>SPAC1B3.14|vma3|I|V-type ATPase V0 subunit c (proteolipid subunit)	1	1	1	1	1	1	1	1	1	1	11.2	11.2	11.2	16.325	161	161	0	7.0917	By MS/MS	By MS/MS	11.2	11.2	30739000	17022000	13716000	0	13716000	2	2	4				223	246	TRUE	258;259	566;567;568;569	524;525;526;527	526	91	43
SPAC1D4.04|cct2|I|chaperonin-containing	SPAC1D4.04|cct2|I|chaperonin-containing	12	12	12	>SPAC1D4.04|cct2|I|chaperonin-containing T-complex beta subunit Cct2	1	12	12	12	12	9	12	9	12	9	32.1	32.1	32.1	56.676	527	527	0	34.716	By MS/MS	By MS/MS	32.1	25.2	158890000	81501000	77390000	65949000	87460000	11	8	19				224	308;485;712;2180;2369;2732;3428;4331;5212;5748;6898;7053	True;True;True;True;True;True;True;True;True;True;True;True	322;506;743;2288;2481;2854;3579;4536;5453;6062;7274;7433	688;689;1081;1082;1528;1529;4499;4885;5711;5712;7206;7207;9190;10917;10918;12530;12531;12532;15061;15062;15063;15064;15397;15398	635;993;1400;4171;4526;5287;5288;6673;6674;8474;8475;8476;10079;10080;11781;11782;14111;14112;14113;14423	635;993;1400;4171;4526;5288;6674;8474;10079;11781;14112;14423
SPAC1D4.06c|csk1|I|cyclin-dependent	SPAC1D4.06c|csk1|I|cyclin-dependent	1	1	1	>SPAC1D4.06c|csk1|I|cyclin-dependent kinase/ cyclin-dependent kinase activating kinase Csk1	1	1	1	1	1	1	1	1	1	1	4.2	4.2	4.2	34.672	306	306	0.00080451	2.0941	By MS/MS	By MS/MS	4.2	4.2	1344200	1344200	0	1253800	0	0	1	1				225	4652	TRUE	4872	9831;9832	9081;9082	9081
SPAC1D4.08|pis1|I|CDP-diacylglycerol--inositol	SPAC1D4.08|pis1|I|CDP-diacylglycerol--inositol	1	1	1	>SPAC1D4.08|pis1|I|CDP-diacylglycerol--inositol 3-phosphatidyltransferase Pis1 (predicted)	1	1	1	1	1	1	1	1	1	1	7.2	7.2	7.2	26.924	237	237	0	5.5573	By MS/MS	By MS/MS	7.2	7.2	11087000	5274000	5813300	0	5813300	1	1	2				226	6285	TRUE	6630	13714;13715	12877;12878	12878
SPAC1D4.13|byr1|I|MAP	SPAC1D4.13|byr1|I|MAP	2	2	2	>SPAC1D4.13|byr1|I|MAP kinase kinase Byr1	1	2	2	2	2	2	2	2	2	2	6.8	6.8	6.8	38.188	340	340	0	3.4867	By MS/MS	By MS/MS	6.8	6.8	17259000	10397000	6862100	9767700	6791700	1	2	3				227	1428;2622	True;True	1504;2739	2957;2958;5481;5482	2733;2734;5091;5092	2734;5092
SPAC1F12.02c|tma19|I|translationally	SPAC1F12.02c|tma19|I|translationally	1	1	1	>SPAC1F12.02c|tma19|I|translationally controlled tumor protein homolog Tma19/Tpt1	1	1	1	1	1	0	1	0	1	0	9.5	9.5	9.5	19.048	168	168	0	3.0867	By MS/MS	By matching	9.5	0	15207000	15207000	0	14184000	0	1	0	1				228	1243	TRUE	1309	2624	2417	2417
SPAC1F12.07|ser1|I|phosphoserine	SPAC1F12.07|ser1|I|phosphoserine	10	10	10	>SPAC1F12.07|ser1|I|phosphoserine aminotransferase (predicted)	1	10	10	10	8	9	8	9	8	9	30.3	30.3	30.3	42.797	389	389	0	30.782	By MS/MS	By MS/MS	26.7	30.3	152010000	78676000	73335000	70713000	76006000	6	9	15				229	1207;2895;2966;3317;3318;4609;4924;4982;5639;7090	True;True;True;True;True;True;True;True;True;True	1270;3024;3098;3461;3462;4829;5149;5215;5949;7471	2560;6075;6076;6077;6230;6231;6981;6982;6983;9756;9757;10334;10335;10467;10468;12106;12107;15470;15471	2359;5627;5628;5769;6475;6476;6477;9010;9011;9546;9547;9667;9668;11231;14489;14490	2359;5627;5769;6476;6477;9010;9547;9668;11231;14489
SPAC1F3.02c|mkh1|I|MEK	SPAC1F3.02c|mkh1|I|MEK	1	1	1	>SPAC1F3.02c|mkh1|I|MEK kinase (MEKK) Mkh1	1	1	1	1	1	0	1	0	1	0	0.9	0.9	0.9	125.13	1116	1116	0.009729	1.0321	By MS/MS	By matching	0.9	0	5860500	5860500	0	5466300	0	1	0	1				230	5474	TRUE	5720	11470	10593	10593
SPAC1F3.05|gga21|I|Golgi	SPAC1F3.05|gga21|I|Golgi	2	2	2	>SPAC1F3.05|gga21|I|Golgi localized Arf binding gamma-adaptin ortholog Gga21	1	2	2	2	1	2	1	2	1	2	4.7	4.7	4.7	56.789	510	510	0	2.4686	By MS/MS	By MS/MS	1.6	4.7	7108700	2103700	5005000	0	5005000	1	1	2				231	1290;5105	True;True	1359;5343	2710;2711;10706	2496;9883	2496;9883
SPAC1F3.06c|spo15|I|mitotic	SPAC1F3.06c|spo15|I|mitotic	23	23	23	>SPAC1F3.06c|spo15|I|mitotic and mieotic spindle pole body protein Spo15	1	23	23	23	23	8	23	8	23	8	15.1	15.1	15.1	222.78	1957	1957	0	100.29	By MS/MS	By MS/MS	15.1	5.8	244040000	178180000	65864000	117590000	114470000	22	7	29				232	1004;1117;1121;1753;2836;3728;4297;4503;4588;4591;4976;5099;5260;5549;6027;6188;6345;6910;6997;7067;7136;7252;8204	True;True;True;True;True;True;True;True;True;True;True;True;True;True;True;True;True;True;True;True;True;True;True	1055;1171;1176;1844;2963;3896;4501;4719;4808;4811;5209;5337;5502;5824;6354;6530;6693;7287;7376;7448;7518;7639;8644	2152;2373;2374;2375;2376;2383;3584;5939;5940;7856;7857;9129;9541;9542;9716;9723;9724;10455;10456;10694;11008;11773;13130;13526;13845;15092;15093;15290;15425;15562;15563;15564;15565;15795;17919	1982;2186;2187;2188;2189;2195;3321;5502;5503;7266;7267;8421;8808;8809;8973;8980;8981;9657;9874;10158;10902;12331;12705;12997;14139;14325;14445;14568;14569;14570;14571;14786;16753	1982;2187;2195;3321;5502;7266;8421;8808;8973;8980;9657;9874;10158;10902;12331;12705;12997;14139;14325;14445;14569;14786;16753
SPAC1F3.09|mug161|I|CwfJ	SPAC1F3.09|mug161|I|CwfJ	4	4	4	>SPAC1F3.09|mug161|I|CwfJ family protein, splicing factor (predicted)	1	4	4	4	4	4	4	4	4	4	11.4	11.4	11.4	63.216	561	561	0	16.215	By MS/MS	By MS/MS	11.4	11.4	73625000	35711000	37913000	31974000	39249000	4	4	8				233	2238;4722;5972;8329	True;True;True;True	2346;4942;6297;8775	4640;4641;9960;9961;13020;13021;18185;18186	4312;4313;9198;9199;12238;12239;16998;16999	4312;9198;12239;16999
SPAC1F5.02|pdi1|I|protein	SPAC1F5.02|pdi1|I|protein	6	6	6	>SPAC1F5.02|pdi1|I|protein disulfide isomerase (predicted)	1	6	6	6	5	3	5	3	5	3	14	14	14	54.88	492	492	0	22.548	By MS/MS	By MS/MS	11.4	6.5	62091000	40312000	21779000	27165000	32215000	5	3	8				234	369;1435;1815;2279;7732;9239	True;True;True;True;True;True	386;1512;1907;2388;8145;9725	818;2977;3700;3701;4714;16844;20120;20121	751;2755;3421;3422;4379;15746;18879;18880	751;2755;3421;4379;15746;18879
SPAC1F5.03c|SPAC1F5.03c|I|FAD-dependent	SPAC1F5.03c|SPAC1F5.03c|I|FAD-dependent	1	1	1	>SPAC1F5.03c|SPAC1F5.03c|I|FAD-dependent oxidoreductase involved in late endosome to Golgi transport (predicted)	1	1	1	1	1	1	1	1	1	1	2.9	2.9	2.9	41.501	382	382	0	3.3294	By matching	By MS/MS	2.9	2.9	9464800	4644400	4820500	0	4820500	0	1	1				235	3431	TRUE	3582	7214;7215	6680	6680
SPAC1F5.06|lsh1|I|ER	SPAC1F5.06|lsh1|I|ER	6	6	6	>SPAC1F5.06|lsh1|I|ER heat shock protein Lsh1 (predicted)	1	6	6	6	5	5	5	5	5	5	9.2	9.2	9.2	94.897	848	848	0	28.32	By MS/MS	By MS/MS	8	7.8	47374000	22490000	24884000	20126000	25736000	3	5	8				236	19;29;371;1562;2947;7009	True;True;True;True;True;True	19;29;388;1646;3076;7388	41;42;62;63;822;823;3245;3246;6179;15314	38;39;54;55;756;757;3003;5720;14345	39;55;756;3003;5720;14345
SPAC1F5.11c|tra2|I|NuA4	SPAC1F5.11c|tra2|I|NuA4	32	32	32	>SPAC1F5.11c|tra2|I|NuA4 complex phosphatidylinositol pseudokinase complex subunit Tra2	1	32	32	32	28	25	28	25	28	25	10.8	10.8	10.8	420.78	3655	3655	0	102.91	By MS/MS	By MS/MS	8.9	8.4	337580000	194370000	143220000	168120000	146430000	25	22	47				237	319;327;428;448;484;602;883;928;1201;1933;2299;2840;4108;4387;4448;4631;4655;4712;4893;4898;5176;5243;5467;5863;5879;6400;6981;7074;8225;8238;8553;9334	True;True;True;True;True;True;True;True;True;True;True;True;True;True;True;True;True;True;True;True;True;True;True;True;True;True;True;True;True;True;True;True	334;342;446;468;505;626;923;975;1263;2030;2408;2967;4299;4596;4660;4851;4875;4932;5118;5123;5417;5485;5713;6178;6194;6753;7360;7455;8667;8680;9015;9824	712;713;727;728;951;1002;1003;1079;1080;1300;1301;1900;1901;1996;2547;2548;3943;3944;4745;4746;5948;8719;8720;9282;9283;9420;9421;9791;9792;9837;9838;9944;10277;10284;10850;10980;11457;11458;12773;12800;12801;13978;15251;15435;15436;17969;17970;17991;17992;18644;18645;18646;18647;20341;20342	656;657;670;671;875;926;991;992;1189;1190;1752;1838;2347;3665;4406;4407;5510;8052;8561;8562;8700;8701;9042;9043;9044;9087;9088;9184;9496;9497;9504;10016;10135;10583;12005;12032;12033;13128;14284;14455;16800;16801;16821;16822;17418;17419;17420;17421;19102;19103	656;671;875;926;991;1190;1752;1838;2347;3665;4406;5510;8052;8562;8700;9042;9087;9184;9496;9504;10016;10135;10583;12005;12032;13128;14284;14455;16801;16822;17421;19103
SPAC1F7.04|rho1|I|Rho;SPAC20H4.11c|rho5|I|Rho	SPAC1F7.04|rho1|I|Rho;SPAC20H4.11c|rho5|I|Rho	2;1	2;1	2;1	>SPAC1F7.04|rho1|I|Rho family GTPase Rho1;>SPAC20H4.11c|rho5|I|Rho family GTPase Rho5	2	2	2	2	1	2	1	2	1	2	12.9	12.9	12.9	22.523	202	202;200	0	4.1377	By MS/MS	By MS/MS	4.5	12.9	15707000	3350400	12356000	0	12356000	1	0	1				238	3129;7519	True;True	3266;7918	6606;16334;16335	6123;15268	6123;15268
SPAC1F7.05|cdc22|I|ribonucleoside	SPAC1F7.05|cdc22|I|ribonucleoside	19	19	19	>SPAC1F7.05|cdc22|I|ribonucleoside reductase large subunit Cdc22	1	19	19	19	17	11	17	11	17	11	30.3	30.3	30.3	91.998	811	811	0	78.359	By MS/MS	By MS/MS	27.1	16.5	316320000	216380000	99941000	153480000	148280000	18	9	27				239	115;952;2257;2666;3003;3065;3090;3229;3451;3831;3922;4320;7633;8021;8075;8133;8253;8487;9064	True;True;True;True;True;True;True;True;True;True;True;True;True;True;True;True;True;True;True	122;1001;2365;2785;3138;3202;3227;3371;3603;4006;4101;4525;8039;8453;8508;8568;8695;8944;9541	251;2043;4674;4675;5577;6318;6474;6527;6528;6529;6530;6809;6810;7256;7257;8095;8096;8286;9171;16574;16575;17499;17620;17621;17776;18018;18019;18507;18508;19762	222;1882;4341;4342;5176;5177;5849;6007;6053;6054;6055;6318;6319;6718;6719;7492;7664;8458;15495;15496;16352;16463;16464;16622;16845;16846;17289;17290;18546	222;1882;4341;5177;5849;6007;6055;6318;6718;7492;7664;8458;15496;16352;16464;16622;16846;17290;18546
SPAC1F7.08|fio1|I|iron	SPAC1F7.08|fio1|I|iron	3	3	3	>SPAC1F7.08|fio1|I|iron transport multicopper oxidase Fio1	1	3	3	3	1	3	1	3	1	3	5.9	5.9	5.9	69.907	622	622	0	5.0992	By MS/MS	By MS/MS	1.9	5.9	17953000	3066500	14887000	0	14887000	1	3	4				240	7976;8919;8952	True;True;True	8405;9392;9425	17404;17405;19382;19453	16263;16264;18099;18162	16264;18099;18162
SPAC1F7.09c|dal2|I|allantoicase	SPAC1F7.09c|dal2|I|allantoicase	2	2	2	>SPAC1F7.09c|dal2|I|allantoicase Dal2 (predicted)	1	2	2	2	2	2	2	2	2	2	8.8	8.8	8.8	37.965	342	342	0	6.2321	By MS/MS	By MS/MS	8.8	8.8	24412000	12637000	11775000	11499000	12063000	2	1	3				241	2846;5454	True;True	2973;5700	5959;5960;11431;11432	5519;5520;10559	5519;10559
SPAC1F7.12|yak3|I|aldose	SPAC1F7.12|yak3|I|aldose	10	10	10	>SPAC1F7.12|yak3|I|aldose reductase ARK13 family YakC	1	10	10	10	8	9	8	9	8	9	44.7	44.7	44.7	37.71	340	340	0	56.549	By MS/MS	By MS/MS	26.8	39.4	226420000	112810000	113610000	126900000	91932000	8	5	13				242	3;382;1632;2425;3222;4520;5839;5928;9123;9170	True;True;True;True;True;True;True;True;True;True	3;399;1719;2538;3362;4736;6154;6249;9606;9654	8;847;848;3369;3370;5008;5009;6785;9574;9575;12720;12721;12908;12909;19890;19891;19982;19983	6;780;3120;3121;4646;4647;6296;8840;8841;11957;12129;12130;18669;18752	6;780;3121;4646;6296;8841;11957;12129;18669;18752
SPBC839.04|rpl803|II|60S;SPBC2F12.07c|rpl802|II|60S;SPAC1F7.13c|rpl801|I|60S	SPBC839.04|rpl803|II|60S;SPBC2F12.07c|rpl802|II|60S;SPAC1F7.13c|rpl801|I|60S	9;9;9	9;9;9	9;9;9	>SPBC839.04|rpl803|II|60S ribosomal protein L8 (predicted);>SPBC2F12.07c|rpl802|II|60S ribosomal protein L8 (predicted);>SPAC1F7.13c|rpl801|I|60S ribosomal protein L8 (predicted)	3	9	9	9	8	9	8	9	8	9	43.1	43.1	43.1	27.1	253	253;253;253	0	65.657	By MS/MS	By MS/MS	42.3	43.1	811100000	353850000	457250000	300060000	474200000	13	11	24				243	2768;2817;3472;4141;5628;6849;7242;7243;8284	True;True;True;True;True;True;True;True;True	2893;2894;2944;3625;4334;5936;5937;7222;7629;7630;8728	5796;5797;5798;5799;5800;5801;5802;5803;5804;5905;5906;7300;7301;8796;8797;8798;12082;12083;12084;14954;14955;14956;14957;15774;15775;15776;15777;15778;18076;18077	5368;5369;5370;5371;5372;5373;5470;5471;5472;6759;6760;8113;8114;11212;11213;14017;14018;14019;14020;14765;14766;14767;14768;14769;16899;16900	5368;5470;6760;8113;11213;14020;14768;14769;16900	92;93	106;203
SPAC1F8.04c|SPAC1F8.04c|I|hydrolase	SPAC1F8.04c|SPAC1F8.04c|I|hydrolase	4	4	4	>SPAC1F8.04c|SPAC1F8.04c|I|hydrolase (predicted)	1	4	4	4	4	2	4	2	4	2	9.5	9.5	9.5	50.37	463	463	0	8.6911	By MS/MS	By MS/MS	9.5	4.1	38368000	27774000	10595000	18891000	17609000	3	2	5				244	74;6875;7848;8200	True;True;True;True	75;7249;8268;8640	149;150;15010;17142;17913;17914	129;14066;16023;16747;16748	129;14066;16023;16748
SPAC1F8.07c|pdc101|I|pyruvate	SPAC1F8.07c|pdc101|I|pyruvate	37	37	37	>SPAC1F8.07c|pdc101|I|pyruvate decarboxylase (predicted)	1	37	37	37	35	35	35	35	35	35	77.6	77.6	77.6	61.547	568	568	0	323.31	By MS/MS	By MS/MS	70.6	76.4	14690000000	7752800000	6937300000	6081100000	6182500000	80	83	163				245	16;41;106;667;668;777;864;1438;1516;1897;1898;2438;2439;2863;3006;3717;3974;4073;4098;4223;4749;5082;5262;5263;5345;5751;6098;6122;6150;6175;6292;6498;7610;7706;7714;8833;8834	True;True;True;True;True;True;True;True;True;True;True;True;True;True;True;True;True;True;True;True;True;True;True;True;True;True;True;True;True;True;True;True;True;True;True;True;True	16;41;111;112;695;696;814;903;904;1517;1598;1990;1991;1992;1993;2551;2552;2991;3141;3884;4154;4263;4289;4421;4422;4969;5320;5504;5505;5588;6065;6432;6457;6488;6513;6637;6638;6853;6854;8015;8117;8118;8126;8127;9301;9302;9303	36;37;88;89;90;91;92;228;229;230;231;232;233;234;235;1444;1445;1446;1447;1448;1449;1675;1676;1856;1857;1858;1859;1860;1861;1862;1863;1864;1865;2983;2984;2985;2986;3148;3149;3867;3868;3869;3870;3871;3872;3873;3874;3875;3876;3877;3878;3879;5030;5031;5032;5033;5034;5994;5995;5996;5997;5998;5999;6000;6001;6002;6325;6326;6327;6328;6329;7830;7831;7832;7833;8395;8396;8397;8398;8648;8649;8650;8651;8699;8…	33;34;77;78;79;80;81;201;202;203;204;205;206;207;208;1322;1323;1324;1325;1326;1327;1539;1540;1709;1710;1711;1712;1713;1714;1715;1716;1717;2761;2762;2763;2764;2918;2919;3587;3588;3589;3590;3591;3592;3593;3594;3595;3596;3597;3598;3599;3600;3601;3602;4665;4666;4667;4668;4669;4670;5552;5553;5554;5555;5556;5557;5558;5559;5560;5561;5562;5855;5856;5857;5858;5859;7241;7242;7243;7244;7759;7760;7761;7762;7…	33;78;207;1323;1324;1539;1710;2762;2918;3593;3600;4665;4669;5561;5859;7241;7761;7989;8033;8276;9248;9849;10161;10163;10316;11791;12505;12568;12626;12671;12888;13347;15455;15688;15709;17936;17940	94;95;96;97;98;99;100;101;102	9;153;249;331;404;416;429;443;459
SPAC20G4.06c|adf1|I|actin	SPAC20G4.06c|adf1|I|actin	1	1	1	>SPAC20G4.06c|adf1|I|actin depolymerizing factor, cofilin	1	1	1	1	1	0	1	0	1	0	10.2	10.2	10.2	15.62	137	137	0	2.8637	By MS/MS	By matching	10.2	0	7406000	7406000	0	6907900	0	1	0	1				246	3465	TRUE	3618	7288	6749	6749
SPAC20G4.08|pdc1|I|mRNA	SPAC20G4.08|pdc1|I|mRNA	5	5	5	>SPAC20G4.08|pdc1|I|mRNA decapping scaffolding protein	1	5	5	5	4	5	4	5	4	5	4.6	4.6	4.6	119.23	1076	1076	0	4.0235	By MS/MS	By MS/MS	3.4	4.6	20988000	8899900	12088000	8956500	11433000	4	3	7				247	1845;6102;6421;6800;8214	True;True;True;True;True	1937;6436;6774;7171;8656	3758;3759;13318;13319;14021;14022;14850;14851;17949	3476;3477;12514;13163;13164;13924;13925;16781	3477;12514;13164;13924;16781
SPAC20G8.03|itr2|I|MFS	SPAC20G8.03|itr2|I|MFS	5	5	5	>SPAC20G8.03|itr2|I|MFS myo-inositol transmembrane transporter	1	5	5	5	5	3	5	3	5	3	8.3	8.3	8.3	61.136	557	557	0	12.125	By MS/MS	By MS/MS	8.3	4.5	41571000	22838000	18734000	19594000	20441000	3	2	5				248	2157;2437;5496;8429;8661	True;True;True;True;True	2262;2550;5746;8885;9126	4445;4446;5028;5029;11527;18399;18400;18854	4122;4123;4664;10645;17198;17199;17613	4123;4664;10645;17198;17613
SPAC20G8.04c|SPAC20G8.04c|I|mitochondrial	SPAC20G8.04c|SPAC20G8.04c|I|mitochondrial	1	1	1	>SPAC20G8.04c|SPAC20G8.04c|I|mitochondrial electron transfer flavoprotein-ubiquinone oxidoreductase Cir2 (predicted)	1	1	1	1	1	0	1	0	1	0	2.4	2.4	2.4	69.472	632	632	0.0015588	1.8189	By MS/MS	By matching	2.4	0	5815100	5815100	0	5424000	0	1	0	1				249	6856	TRUE	7230	14971	14034	14034
SPAC20G8.05c|cdc15|I|extended	SPAC20G8.05c|cdc15|I|extended	1	1	1	>SPAC20G8.05c|cdc15|I|extended Fer/CIP4 (EFC) domain protein Cdc15	1	1	1	1	1	1	1	1	1	1	1.5	1.5	1.5	102.12	927	927	0	3.0153	By matching	By MS/MS	1.5	1.5	6066000	2909600	3156400	0	3156400	0	1	1				250	8731	TRUE	9196	18995;18996	17741	17741
SPAC20G8.06|not1|I|CCR4-Not	SPAC20G8.06|not1|I|CCR4-Not	16	16	16	>SPAC20G8.06|not1|I|CCR4-Not complex subunit Not1 (predicted)	1	16	16	16	12	16	12	16	12	16	8.8	8.8	8.8	237.13	2100	2100	0	45.117	By MS/MS	By MS/MS	6	8.8	124790000	54725000	70061000	56029000	65077000	11	13	24				251	15;483;567;1063;1324;1824;2027;3877;4816;4927;4995;5802;6768;7824;8471;8831	True;True;True;True;True;True;True;True;True;True;True;True;True;True;True;True	15;504;590;1116;1395;1916;2127;4056;5039;5152;5229;6117;7139;8241;8928;9299	33;34;35;1077;1078;1231;1232;2270;2271;2779;2780;3717;3718;4187;8193;8194;10128;10129;10341;10497;10498;12643;14790;17050;17051;18479;18480;19192;19193	30;31;32;989;990;1131;2093;2094;2562;2563;3438;3439;3893;7578;7579;9360;9361;9553;9693;9694;11885;13870;15944;17264;17265;17925	31;990;1131;2093;2562;3438;3893;7579;9360;9553;9694;11885;13870;15944;17264;17925
SPAC20G8.07c|erg2|I|C-8	SPAC20G8.07c|erg2|I|C-8	2	2	2	>SPAC20G8.07c|erg2|I|C-8 sterol isomerase Erg2	1	2	2	2	1	1	1	1	1	1	7.8	7.8	7.8	24.671	219	219	0.0080468	1.373	By MS/MS	By MS/MS	4.1	3.7	9122900	9122900	0	8509300	0	0	1	1				252	6834;8022	True;True	7207;8454	14919;17500	13985;16353	13985;16353
SPAC20G8.10c|atg6|I|autophagy	SPAC20G8.10c|atg6|I|autophagy	2	2	2	>SPAC20G8.10c|atg6|I|autophagy associated beclin family protein Atg6	1	2	2	2	2	1	2	1	2	1	5.4	5.4	5.4	53.959	464	464	0	6.049	By MS/MS	By matching	5.4	3	13749000	10850000	2898200	10121000	0	2	0	2				253	4239;7865	True;True	4438;8285	9007;17177;17178	8306;16051	8306;16051
SPAC21E11.03c|pcr1|I|transcription	SPAC21E11.03c|pcr1|I|transcription	3	3	3	>SPAC21E11.03c|pcr1|I|transcription factor Pcr1	1	3	3	3	2	3	2	3	2	3	17	17	17	19.348	171	171	0	6.5065	By MS/MS	By MS/MS	8.8	17	39034000	11058000	27976000	0	27976000	1	2	3				254	5104;6567;7197	True;True;True	5342;6925;7583	10704;10705;14358;14359;15684	9882;13474;13475;14686	9882;13474;14686
SPAC21E11.07|iba57|I|mitochondrial	SPAC21E11.07|iba57|I|mitochondrial	1	1	1	>SPAC21E11.07|iba57|I|mitochondrial iron-sulfur cluster assembly protein Iba57 (predicted)	1	1	1	1	1	1	1	1	1	1	2.2	2.2	2.2	36.883	325	325	0.0096953	1.0204	By MS/MS	By matching	2.2	2.2	18272000	9122600	9149500	0	9149500	2	0	2				255	8283	TRUE	8727	18074;18075	16897;16898	16898
SPAC21E11.08|lcb2|I|serine	SPAC21E11.08|lcb2|I|serine	4	4	4	>SPAC21E11.08|lcb2|I|serine palmitoyltransferase Lcb2 (predicted)	1	4	4	4	3	4	3	4	3	4	12.1	12.1	12.1	67.518	603	603	0	5.4243	By MS/MS	By MS/MS	8.8	12.1	31767000	12307000	19460000	0	19460000	0	2	2				256	1148;2331;5007;7237	True;True;True;True	1209;2441;5242;7624	2448;2449;4809;4810;10526;15765;15766	2256;2257;4460;9722;14758	2257;4460;9722;14758
SPAC222.07c|hri2|I|eIF2	SPAC222.07c|hri2|I|eIF2	18	18	18	>SPAC222.07c|hri2|I|eIF2 alpha kinase Hri2	1	18	18	18	17	15	17	15	17	15	31.8	31.8	31.8	73.366	639	639	0	79.595	By MS/MS	By MS/MS	30.4	25.5	531830000	278330000	253500000	272730000	237850000	17	11	28				257	1023;1310;2171;2225;2443;2735;3375;3376;3390;3651;4423;4665;4738;4739;5141;5750;7145;9117	True;True;True;True;True;True;True;True;True;True;True;True;True;True;True;True;True;True	1076;1380;2279;2333;2556;2857;3523;3524;3538;3816;4634;4885;4958;4959;5381;6064;7527;9600	2194;2195;2196;2197;2748;4476;4477;4583;4584;5040;5041;5716;7091;7092;7093;7094;7116;7117;7691;7692;9371;9372;9860;9990;9991;9992;10783;10784;12536;12537;12538;12539;12540;15578;15579;19880;19881	2023;2024;2025;2026;2528;4150;4151;4243;4244;4675;4676;5292;6572;6573;6574;6595;6596;7111;7112;8657;9111;9229;9230;9231;9953;9954;11786;11787;11788;14585;18659;18660	2023;2528;4150;4244;4675;5292;6572;6574;6596;7111;8657;9111;9229;9231;9953;11788;14585;18660
SPAC222.08c|sno1|I|glutamine	SPAC222.08c|sno1|I|glutamine	4	4	4	>SPAC222.08c|sno1|I|glutamine aminotransferase subunit Sno1 (predicted)	1	4	4	4	4	2	4	2	4	2	26.9	26.9	26.9	25.901	234	234	0	33.841	By MS/MS	By MS/MS	26.9	6.4	40167000	38343000	1823400	35764000	0	4	1	5				258	582;1503;2123;8880	True;True;True;True	605;1585;2226;9352	1262;3124;4375;4376;19305;19306	1158;2894;4057;4058;18031	1158;2894;4058;18031
SPAC222.09|seb1|I|RNA-binding	SPAC222.09|seb1|I|RNA-binding	2	2	2	>SPAC222.09|seb1|I|RNA-binding protein Seb1	1	2	2	2	2	2	2	2	2	2	3.7	3.7	3.7	66.439	620	620	0	3.6732	By MS/MS	By matching	3.7	3.7	11887000	5874700	6012000	5409700	6081900	2	0	2				259	1956;7740	True;True	2055;8153	4003;4004;16856;16857	3718;15757	3718;15757
SPAC222.11|hem13|I|coproporphyrinogen	SPAC222.11|hem13|I|coproporphyrinogen	4	4	4	>SPAC222.11|hem13|I|coproporphyrinogen III oxidase Hem13 (predicted)	1	4	4	4	4	2	4	2	4	2	18.6	18.6	18.6	36.244	312	312	0	10.836	By MS/MS	By MS/MS	18.6	8.7	30665000	16138000	14527000	8712000	14486000	5	1	6				260	4649;5939;8209;9052	True;True;True;True	4869;6260;8649;8650;9529	9826;12927;12928;17928;17929;17930;17931;19742	9076;12147;12148;16761;16762;18529	9076;12148;16761;18529	103	279
SPAC222.12c|atp2|I|F1-ATPase	SPAC222.12c|atp2|I|F1-ATPase	11	11	11	>SPAC222.12c|atp2|I|F1-ATPase beta subunit Atp2	1	11	11	11	11	10	11	10	11	10	31.2	31.2	31.2	56.875	525	525	0	43.344	By MS/MS	By MS/MS	31.2	31.2	298880000	115180000	183700000	108340000	182790000	13	12	25				261	1003;2251;2739;3396;3623;3624;3677;5376;7991;8741;9280	True;True;True;True;True;True;True;True;True;True;True	1054;2359;2862;3544;3785;3786;3843;5619;8420;9207;9769	2148;2149;2150;2151;4662;4663;5726;5727;5728;5729;7134;7135;7630;7631;7632;7749;7750;11259;11260;17433;17434;19015;19016;20207;20208	1979;1980;1981;4331;4332;5302;5303;5304;5305;6610;6611;7056;7057;7058;7169;10392;10393;16290;16291;16292;17759;17760;17761;17762;18964	1979;4331;5302;6610;7056;7057;7169;10392;16290;17760;18964
SPAC222.13c|SPAC222.13c|I|6-phosphofructo-2-kinase	SPAC222.13c|SPAC222.13c|I|6-phosphofructo-2-kinase	2	2	2	>SPAC222.13c|SPAC222.13c|I|6-phosphofructo-2-kinase (predicted)	1	2	2	2	2	1	2	1	2	1	4.2	4.2	4.2	68.639	592	592	0	4.5337	By MS/MS	By MS/MS	4.2	2.5	13490000	7594400	5895500	7083600	0	2	2	4				262	2189;5115	True;True	2297;5355	4514;4515;10728	4182;4183;4184;9904	4183;9904
SPAC227.07c|pab1|I|protein	SPAC227.07c|pab1|I|protein	4	4	4	>SPAC227.07c|pab1|I|protein phosphatase PP2A regulatory subunit B-55 Pab1	1	4	4	4	4	3	4	3	4	3	11.2	11.2	11.2	52.795	463	463	0	9.1734	By MS/MS	By MS/MS	11.2	8.6	43826000	20290000	23535000	18551000	23910000	3	2	5				263	255;1926;5495;6790	True;True;True;True	268;2023;5745;7161	588;589;3929;3930;11526;14830;14831	544;545;3651;3652;10644;13905;13906	544;3651;10644;13905
SPAC227.14|yfh7|I|uridine	SPAC227.14|yfh7|I|uridine	1	1	1	>SPAC227.14|yfh7|I|uridine kinase Yfh7 (predicted)	1	1	1	1	1	1	1	1	1	1	4.7	4.7	4.7	26.619	235	235	0.0099291	1.1784	By MS/MS	By MS/MS	4.7	4.7	1805700	1805700	0	1684300	0	1	1	2				264	798	TRUE	835	1716;1717	1576;1577	1577
SPAC227.18|lys3|I|saccharopine	SPAC227.18|lys3|I|saccharopine	11	11	11	>SPAC227.18|lys3|I|saccharopine dehydrogenase Lys3	1	11	11	11	11	9	11	9	11	9	40.8	40.8	40.8	41.392	368	368	0	42.625	By MS/MS	By MS/MS	40.8	33.2	359990000	178700000	181290000	153360000	194610000	10	8	18				265	1234;1703;2117;2814;3119;3391;3605;4512;5449;6239;7490	True;True;True;True;True;True;True;True;True;True;True	1299;1792;2219;2941;3256;3539;3764;4728;5695;6582;7887	2607;3489;4361;4362;5897;5898;6588;6589;6590;6591;7118;7119;7594;7595;9558;9559;11420;11421;13618;13619;16277;16278	2401;3232;4047;5461;5462;5463;6107;6108;6109;6110;6597;6598;7024;7025;8825;8826;10550;12791;12792;15218	2401;3232;4047;5463;6110;6598;7024;8825;10550;12792;15218
SPAC5D6.01|rps2202|I|40S;SPAC22A12.04c|rps2201|I|40S	SPAC5D6.01|rps2202|I|40S;SPAC22A12.04c|rps2201|I|40S	5;5	5;5	5;5	>SPAC5D6.01|rps2202|I|40S ribosomal protein S15a (predicted);>SPAC22A12.04c|rps2201|I|40S ribosomal protein S15a (predicted)	2	5	5	5	4	4	4	4	4	4	37.7	37.7	37.7	14.76	130	130;130	0	25.263	By MS/MS	By MS/MS	31.5	26.9	153700000	91970000	61733000	64810000	82707000	3	3	6				266	2090;2959;3868;6465;8954	True;True;True;True;True	2191;3090;4047;6820;9427	4314;4315;6212;8175;14145;14146;19456;19457	4007;4008;5751;7560;13292;18165;18166	4007;5751;7560;13292;18166
SPAC22A12.06c|fsh2|I|serine	SPAC22A12.06c|fsh2|I|serine	2	2	2	>SPAC22A12.06c|fsh2|I|serine hydrolase-like	1	2	2	2	2	2	2	2	2	2	4.9	4.9	4.9	48.231	429	429	0	3.2763	By MS/MS	By MS/MS	4.9	4.9	4445600	2442900	2002700	2350600	1930700	2	1	3				267	2996;4361	True;True	3131;4568	6303;6304;9239;9240	5834;5835;8524	5834;8524
SPAC22A12.07c|ogm1|I|protein	SPAC22A12.07c|ogm1|I|protein	14	14	14	>SPAC22A12.07c|ogm1|I|protein O-mannosyltransferase Ogm1	1	14	14	14	12	14	12	14	12	14	20.7	20.7	20.7	101.33	893	893	0	63.193	By MS/MS	By MS/MS	19.1	20.7	424080000	197480000	226600000	186730000	218460000	13	16	29				268	38;39;654;2876;4105;4638;4834;5521;5866;7122;7346;7347;8915;9367	True;True;True;True;True;True;True;True;True;True;True;True;True;True	38;39;682;3005;4296;4858;5057;5058;5783;6181;7504;7738;7739;9387;9857	81;82;83;84;85;1412;6033;6034;6035;8712;8713;8714;9803;9804;10165;10166;10167;11688;11689;11690;12777;12778;12779;15537;15538;15994;15995;15996;19372;19373;20403;20404;20405;20406	71;72;73;74;75;1291;5591;5592;5593;8045;8046;8047;9053;9054;9392;9393;9394;10829;10830;12010;12011;12012;14546;14547;14959;14960;14961;18090;18091;19155;19156;19157	71;74;1291;5592;8045;9053;9394;10830;12010;14547;14959;14961;18090;19155	104;105	79;536
SPAC22A12.08c|SPAC22A12.08c|I|cardiolipin	SPAC22A12.08c|SPAC22A12.08c|I|cardiolipin	1	1	1	>SPAC22A12.08c|SPAC22A12.08c|I|cardiolipin synthase/ hydrolase fusion protein (predicted)	1	1	1	1	1	0	1	0	1	0	3.3	3.3	3.3	63.879	570	570	0	2.2641	By MS/MS	By matching	3.3	0	1807500	1807500	0	1685900	0	1	0	1				269	935	TRUE	983	2012	1853	1853
SPAC22A12.10|ept1|I|diacylglycerol	SPAC22A12.10|ept1|I|diacylglycerol	1	1	1	>SPAC22A12.10|ept1|I|diacylglycerol cholinephosphotransferase/ diacylglycerol ethanolaminesphotransferase Ept1 (predicted)	1	1	1	1	1	1	1	1	1	1	3.1	3.1	3.1	44.083	386	386	0	3.2545	By matching	By MS/MS	3.1	3.1	25793000	13187000	12606000	0	12606000	0	1	1				270	4582	TRUE	4801	9705;9706	8961	8961
SPAC22A12.11|dak1|I|dihydroxyacetone	SPAC22A12.11|dak1|I|dihydroxyacetone	10	10	10	>SPAC22A12.11|dak1|I|dihydroxyacetone kinase Dak1	1	10	10	10	9	9	9	9	9	9	25.3	25.3	25.3	62.316	580	580	0	28.852	By MS/MS	By MS/MS	23.6	23.1	147560000	64975000	82581000	56545000	86642000	7	9	16				271	20;2008;2606;2612;3785;3942;6086;6117;6462;8104	True;True;True;True;True;True;True;True;True;True	20;2108;2723;2729;3959;4121;6419;6452;6817;8538	43;44;4155;5452;5453;5461;5462;8008;8009;8327;8328;13288;13289;13290;13363;13364;14141;17679;17680	40;3864;5065;5066;5072;7414;7415;7702;12484;12485;12486;12560;12561;13288;16517;16518	40;3864;5066;5072;7414;7702;12484;12561;13288;16518
SPAC22A12.15c|bip1|I|ER	SPAC22A12.15c|bip1|I|ER	21	20	20	>SPAC22A12.15c|bip1|I|ER heat shock protein BiP	1	21	20	20	21	19	20	18	20	18	35	33.3	33.3	73.226	663	663	0	97.001	By MS/MS	By MS/MS	35	33	579370000	272430000	306940000	262920000	298120000	20	22	42				272	358;871;1296;3305;3823;3824;3879;3880;4327;5952;5969;6193;6194;6317;6753;6808;7755;8198;8360;8601;8602	True;True;True;True;True;True;True;True;True;True;True;True;True;True;True;True;True;False;True;True;True	375;911;1366;3449;3997;3998;4058;4059;4532;6273;6294;6535;6536;6664;7124;7180;8168;8638;8810;9065;9066	799;800;801;802;1879;1880;2720;6950;6951;6952;8079;8080;8081;8197;8198;8199;8200;8201;8202;9184;9185;12954;12955;13013;13014;13015;13016;13534;13535;13536;13537;13790;13791;14762;14763;14764;14866;14867;14868;16882;16883;17908;17909;17910;18257;18258;18737;18738;18739;18740	736;737;1732;1733;2505;6445;6446;6447;7476;7477;7478;7582;7583;7584;7585;7586;7587;8468;8469;12176;12177;12230;12231;12232;12233;12712;12713;12714;12715;12948;12949;13843;13844;13938;13939;13940;15780;15781;16742;16743;16744;17068;17504;17505;17506;17507	737;1733;2505;6445;7476;7478;7586;7587;8469;12176;12233;12713;12714;12948;13843;13939;15780;16743;17068;17504;17507
SPAC22A12.16|acl2|I|ATP-citrate	SPAC22A12.16|acl2|I|ATP-citrate	6	6	6	>SPAC22A12.16|acl2|I|ATP-citrate synthase subunit 2 (predicted)	1	6	6	6	6	3	6	3	6	3	16.5	16.5	16.5	53.942	492	492	0	15.132	By MS/MS	By MS/MS	16.5	9.6	73276000	42193000	31082000	34187000	36251000	6	2	8				273	238;1585;4066;5325;8014;8206	True;True;True;True;True;True	250;1670;4255;5568;8446;8646	554;3281;8634;8635;11138;11139;17485;17486;17921;17922	514;3036;7974;7975;10276;10277;16340;16755;16756	514;3036;7974;10277;16340;16756
SPAC22E12.07|rna1|I|Ran	SPAC22E12.07|rna1|I|Ran	1	1	1	>SPAC22E12.07|rna1|I|Ran GAP Rna1	1	1	1	1	1	0	1	0	1	0	2.6	2.6	2.6	43.235	386	386	0	2.351	By MS/MS	By matching	2.6	0	1879600	1879600	0	1753200	0	1	0	1				274	4406	TRUE	4615	9310	8589	8589
SPAC22E12.17c|glo3|I|ARF	SPAC22E12.17c|glo3|I|ARF	3	3	3	>SPAC22E12.17c|glo3|I|ARF GTPase activating protein (predicted)	1	3	3	3	3	1	3	1	3	1	7.7	7.7	7.7	52.583	483	483	0	9.2563	By MS/MS	By MS/MS	7.7	2.7	17650000	12523000	5127600	11681000	0	3	0	3				275	994;6960;7349	True;True;True	1045;7338;7741	2136;15204;15999;16000	1967;14239;14963;14964	1967;14239;14963
SPAC22F3.06c|lon1|I|Lon	SPAC22F3.06c|lon1|I|Lon	7	7	7	>SPAC22F3.06c|lon1|I|Lon protease homolog Lon1 (predicted)	1	7	7	7	5	5	5	5	5	5	8.2	8.2	8.2	118.64	1067	1067	0	19.489	By MS/MS	By MS/MS	5.3	6.2	58263000	34553000	23711000	0	23711000	4	5	9				276	997;2158;2588;4213;8423;8666;9176	True;True;True;True;True;True;True	1048;2263;2705;4411;8879;9131;9660	2140;2141;4447;5411;8957;8958;18391;18863;19994;19995	1971;1972;4124;5028;8256;8257;17190;17622;17623;18762	1972;4124;5028;8257;17190;17623;18762	106	506
SPAC22F3.07c|atp20|I|F0-ATPase	SPAC22F3.07c|atp20|I|F0-ATPase	2	2	2	>SPAC22F3.07c|atp20|I|F0-ATPase subunit G (predicted)	1	2	2	2	2	1	2	1	2	1	22	22	22	13.64	118	118	0	3.758	By MS/MS	By MS/MS	22	12.7	16734000	9778900	6955100	9121200	0	2	1	3				277	1602;3215	True;True	1687;3355	3315;3316;6772;6773	3067;3068;6283;6284	3068;6283
SPAC22F3.10c|gcs1|I|glutamate-cysteine	SPAC22F3.10c|gcs1|I|glutamate-cysteine	4	4	4	>SPAC22F3.10c|gcs1|I|glutamate-cysteine ligase Gcs1	1	4	4	4	3	4	3	4	3	4	7.2	7.2	7.2	76.522	669	669	0	7.1962	By MS/MS	By MS/MS	5.8	7.2	30615000	10943000	19672000	0	19672000	1	2	3				278	2144;5714;6015;6786	True;True;True;True	2248;6027;6342;7157	4416;12465;12466;13107;13108;14823;14824	4095;11726;12313;13899;13900	4095;11726;12313;13899
SPAC22F3.12c|rgs1|I|regulator	SPAC22F3.12c|rgs1|I|regulator	6	6	6	>SPAC22F3.12c|rgs1|I|regulator of G-protein signaling Rgs1	1	6	6	6	6	4	6	4	6	4	15.6	15.6	15.6	54.362	481	481	0	14.019	By MS/MS	By MS/MS	15.6	8.5	66740000	48705000	18034000	38009000	25454000	3	2	5				279	1482;2335;2500;2806;4870;8914	True;True;True;True;True;True	1563;2445;2615;2933;5095;9386	3087;3088;4815;5171;5172;5880;10234;10235;19370;19371	2860;2861;4464;4794;5445;9456;9457;18089	2861;4464;4794;5445;9457;18089
SPAC22F3.13|tsc1|I|hamartin	SPAC22F3.13|tsc1|I|hamartin	13	13	13	>SPAC22F3.13|tsc1|I|hamartin	1	13	13	13	11	6	11	6	11	6	17.4	17.4	17.4	103.43	899	899	0	35.222	By MS/MS	By MS/MS	15.1	8.7	83633000	51067000	32566000	43679000	36519000	10	5	15				280	297;592;1066;1096;3011;3609;3751;5231;5997;7998;8406;9272;9290	True;True;True;True;True;True;True;True;True;True;True;True;True	311;616;1119;1149;3146;3769;3923;5473;6323;8427;8860;9761;9779	671;1280;1281;2274;2331;2332;6337;7604;7944;10958;10959;13068;17447;17448;18361;20194;20245	619;1174;2097;2152;2153;5867;7033;7354;10116;10117;12283;16302;16303;17160;18954;19002	619;1174;2097;2152;5867;7033;7354;10117;12283;16302;17160;18954;19002
SPAC22F8.05|SPAC22F8.05|I|alpha,alpha-trehalose-phosphate	SPAC22F8.05|SPAC22F8.05|I|alpha,alpha-trehalose-phosphate	16	16	16	>SPAC22F8.05|SPAC22F8.05|I|alpha,alpha-trehalose-phosphate synthase (predicted)	1	16	16	16	14	13	14	13	14	13	26.8	26.8	26.8	100.66	891	891	0	63.895	By MS/MS	By MS/MS	22.6	21.7	293880000	154860000	139010000	131610000	145580000	12	10	22				281	147;659;806;1436;1805;2244;2818;3087;4734;5927;6657;7278;7607;7850;8506;8674	True;True;True;True;True;True;True;True;True;True;True;True;True;True;True;True	156;687;843;1513;1514;1896;2352;2945;3224;4954;6248;7017;7668;8012;8270;8963;9139	379;380;1426;1427;1740;1741;2978;2979;2980;3679;3680;4651;4652;5907;5908;6522;9982;9983;12904;12905;12906;12907;14540;14541;15852;15853;16526;17145;17146;18547;18876	350;351;1308;1309;1597;2756;2757;2758;3403;4321;4322;5473;5474;6048;9221;9222;12126;12127;12128;13631;14836;15452;16025;16026;17326;17634	350;1309;1597;2758;3403;4321;5473;6048;9221;12126;13631;14836;15452;16025;17326;17634	107;108	302;524
SPAC22F8.06|pam1|I|20S	SPAC22F8.06|pam1|I|20S	1	1	1	>SPAC22F8.06|pam1|I|20S proteasome complex subunit beta 6	1	1	1	1	1	0	1	0	1	0	5.3	5.3	5.3	25.082	225	225	0	2.2729	By MS/MS	By matching	5.3	0	3621800	3621800	0	3378200	0	1	0	1				282	3832	TRUE	4007	8097	7493	7493
SPAC22F8.08|sec24|I|COPII	SPAC22F8.08|sec24|I|COPII	18	18	18	>SPAC22F8.08|sec24|I|COPII cargo receptor Sec24/Sfb2 subunit	1	18	18	18	16	13	16	13	16	13	21.1	21.1	21.1	101.9	926	926	0	60.711	By MS/MS	By MS/MS	19	16.2	253530000	131810000	121710000	118120000	126540000	16	11	27				283	314;315;487;902;2168;2246;3235;3669;4853;5346;5347;5598;5625;5825;5953;6255;7229;7425	True;True;True;True;True;True;True;True;True;True;True;True;True;True;True;True;True;True	329;330;508;947;2275;2354;3377;3835;5077;5589;5590;5893;5932;6140;6274;6600;7616;7819	704;705;1085;1951;1952;1953;1954;4469;4470;4654;4655;6823;7734;7735;10201;11181;11182;11183;11184;12005;12006;12076;12691;12692;12693;12694;12956;12957;13651;15750;15751;16149;16150	649;650;996;1797;1798;1799;1800;4143;4144;4324;4325;6332;7154;7155;9424;10317;10318;10319;10320;11139;11206;11207;11928;11929;11930;12178;12821;14746;15101;15102	649;650;996;1797;4143;4324;6332;7155;9424;10318;10319;11139;11207;11929;12178;12821;14746;15102
SPAC22G7.04|pan2|I|ubiquitin	SPAC22G7.04|pan2|I|ubiquitin	1	1	1	>SPAC22G7.04|pan2|I|ubiquitin C-terminal hydrolase, poly(A)-specific ribonuclease complex subunit Pan2 (predicted)	1	1	1	1	1	0	1	0	1	0	0.8	0.8	0.8	123.87	1088	1088	0.0098731	1.1457	By MS/MS	By matching	0.8	0	0	0	0	0	0	1	0	1				284	3672	TRUE	3838	7740	7160	7160
SPAC22G7.06c|ura1|I|carbamoyl-phosphate	SPAC22G7.06c|ura1|I|carbamoyl-phosphate	55	55	54	>SPAC22G7.06c|ura1|I|carbamoyl-phosphate synthase (glutamine hydrolyzing), aspartate carbamoyltransferase Ura1	1	55	55	54	50	42	50	42	49	41	29.5	29.5	29.2	248.31	2244	2244	0	224.19	By MS/MS	By MS/MS	27.8	23.1	1068900000	544260000	524680000	457840000	550710000	43	39	82				285	122;477;679;930;1037;1269;1270;1309;1462;1470;1656;1771;1779;2072;2073;2281;2695;2696;2773;2795;2896;2987;3018;3270;3381;3423;3541;3542;3604;4007;4086;4422;4536;4713;4746;4807;4941;5051;5448;5547;5784;5940;6262;6278;6724;6809;6861;6881;7344;7945;8438;8439;8585;8682;8738	True;True;True;True;True;True;True;True;True;True;True;True;True;True;True;True;True;True;True;True;True;True;True;True;True;True;True;True;True;True;True;True;True;True;True;True;True;True;True;True;True;True;True;True;True;True;True;True;True;True;True;True;True;True;True	130;498;707;978;1090;1336;1337;1379;1542;1551;1744;1862;1870;2173;2174;2390;2815;2816;2899;2921;2922;3025;3122;3153;3412;3529;3574;3696;3697;3762;3763;4192;4277;4633;4753;4933;4966;5029;5170;5288;5694;5821;6099;6261;6607;6623;7091;7092;7181;7235;7255;7256;7736;8371;8895;8896;9047;9147;9204	265;266;1067;1068;1466;1467;2002;2003;2215;2216;2674;2675;2746;2747;3048;3049;3066;3414;3415;3613;3626;3627;4278;4279;4280;4716;4717;5633;5634;5635;5817;5856;5857;5858;5859;6078;6079;6080;6081;6285;6286;6349;6350;6887;6888;6889;6890;7102;7103;7194;7195;7196;7197;7465;7466;7590;7591;7592;7593;8479;8480;8673;8674;8675;8676;9370;9609;9945;9946;10004;10005;10113;10114;10387;10388;10600;11418;11419;11…	236;979;980;1343;1344;1844;2042;2043;2464;2465;2526;2527;2824;2825;2840;3164;3165;3348;3357;3975;3976;3977;3978;3979;4381;5220;5221;5385;5423;5424;5425;5426;5629;5630;5631;5632;5819;5820;5880;5881;6390;6391;6392;6581;6582;6662;6663;6664;6909;6910;7020;7021;7022;7023;7831;8011;8012;8656;8872;9185;9186;9242;9243;9344;9345;9597;9598;9792;10548;10549;10899;11855;12149;12833;12834;12864;12865;13781;13…	236;979;1343;1844;2042;2464;2465;2526;2824;2840;3165;3348;3357;3975;3979;4381;5220;5221;5385;5426;5630;5820;5880;6390;6582;6663;6909;6910;7022;7831;8011;8656;8872;9186;9243;9344;9597;9792;10549;10899;11855;12149;12833;12865;13782;13941;14044;14081;14952;16193;17214;17216;17465;17655;17755	109;110;111;112	272;1017;1960;2196
SPAC22H10.12c|gdi1|I|GDP	SPAC22H10.12c|gdi1|I|GDP	1	1	1	>SPAC22H10.12c|gdi1|I|GDP dissociation inhibitor Gdi1 (predicted)	1	1	1	1	1	1	1	1	1	1	2.3	2.3	2.3	49.555	440	440	0.0015361	1.6777	By MS/MS	By MS/MS	2.3	2.3	10231000	5227800	5003400	0	5003400	1	1	2				286	3564	TRUE	3721	7512;7513	6950;6951	6950
SPAC22H12.02|tfg3|I|transcription	SPAC22H12.02|tfg3|I|transcription	3	3	3	>SPAC22H12.02|tfg3|I|transcription factor TFIIF complex subunit Tfg3	1	3	3	3	3	2	3	2	3	2	22	22	22	27.638	241	241	0	13.556	By MS/MS	By MS/MS	22	14.1	33613000	16770000	16843000	13190000	19295000	3	2	5				287	491;4580;4693	True;True;True	512;4799;4913	1092;9700;9701;9702;9911;9912	1003;8957;8958;8959;9158	1003;8958;9158
SPAC22H12.04c|rps102|I|40S	SPAC22H12.04c|rps102|I|40S	9	9	5	>SPAC22H12.04c|rps102|I|40S ribosomal protein S3a (predicted)	1	9	9	5	9	8	9	8	5	5	32.1	32.1	23	28.521	252	252	0	31.057	By MS/MS	By MS/MS	32.1	29.4	431520000	226520000	204990000	193910000	204460000	7	11	18				288	551;677;3527;3528;3529;4670;6702;8257;8746	True;True;True;True;True;True;True;True;True	572;705;3682;3683;3684;4890;7066;8699;9212	1198;1199;1463;1464;7437;7438;7439;7440;7441;7442;7443;7444;7445;7446;9867;9868;14645;14646;18025;18026;19030	1099;1100;1340;1341;6884;6885;6886;6887;6888;6889;6890;6891;6892;9118;9119;13731;16852;16853;16854;17775	1099;1340;6885;6888;6891;9118;13731;16854;17775
SPAC23A1.05|SPAC23A1.05|I|serine	SPAC23A1.05|SPAC23A1.05|I|serine	1	1	1	>SPAC23A1.05|SPAC23A1.05|I|serine palmitoyltransferase subunit A (predicted)	1	1	1	1	1	1	1	1	1	1	6.9	6.9	6.9	11.653	101	101	0.00080386	2.0689	By MS/MS	By MS/MS	6.9	6.9	5131100	2220800	2910400	0	2910400	1	1	2				289	4858	TRUE	5082	10210;10211	9432;9433	9433
SPAC23A1.06c|cmk2|I|MAPK-activated	SPAC23A1.06c|cmk2|I|MAPK-activated	3	3	3	>SPAC23A1.06c|cmk2|I|MAPK-activated protein kinase Cmk2	1	3	3	3	3	1	3	1	3	1	6.5	6.5	6.5	56.609	504	504	0	8.3629	By MS/MS	By MS/MS	6.5	2	10266000	7203100	3062800	6718600	0	3	1	4				290	1082;1229;3544	True;True;True	1135;1293;3699	2306;2600;7469;7470	2129;2394;6912;6913	2129;2394;6912
SPCC1322.15|rpl3402|III|60S;SPAC23A1.08c|rpl3401|I|60S	SPCC1322.15|rpl3402|III|60S;SPAC23A1.08c|rpl3401|I|60S	1;1	1;1	1;1	>SPCC1322.15|rpl3402|III|60S ribosomal protein L34;>SPAC23A1.08c|rpl3401|I|60S ribosomal protein L34	2	1	1	1	1	0	1	0	1	0	15.3	15.3	15.3	12.8	111	111;112	0	4.3574	By MS/MS	By matching	15.3	0	8625100	8625100	0	8045000	0	0	0	0				291	821	TRUE	858	1766	1620	1620
SPCC794.09c|tef101|III|translation;SPBC839.15c|tef103|II|translation;SPAC23A1.10|tef102|I|translation	SPCC794.09c|tef101|III|translation;SPBC839.15c|tef103|II|translation;SPAC23A1.10|tef102|I|translation	28;28;28	28;28;28	28;28;28	>SPCC794.09c|tef101|III|translation elongation factor EF-1 alpha Ef1a-a;>SPBC839.15c|tef103|II|translation elongation factor EF-1 alpha Ef1a-c;>SPAC23A1.10|tef102|I|translation elongation factor EF-1 alpha Ef1a-b	3	28	28	28	27	27	27	27	27	27	59.3	59.3	59.3	49.66	460	460;460;460	0	200.64	By MS/MS	By MS/MS	58.9	59.3	14668000000	8162400000	6505700000	6328000000	5782000000	55	59	114				292	1446;1676;1729;1730;1811;1876;1877;2481;2543;3386;4161;5059;5506;5619;6128;6342;6455;6838;7345;7364;7758;7759;8009;8212;9006;9007;9233;9234	True;True;True;True;True;True;True;True;True;True;True;True;True;True;True;True;True;True;True;True;True;True;True;True;True;True;True;True	1526;1764;1818;1819;1903;1969;1970;2595;2659;3534;4355;5296;5761;5921;5922;5923;6463;6464;6690;6810;7211;7737;7757;7758;8171;8172;8439;8440;8441;8653;8654;9481;9482;9719;9720	3007;3008;3009;3010;3011;3447;3535;3536;3537;3693;3694;3817;3818;3819;3820;3821;3822;3823;3824;5115;5116;5117;5118;5119;5120;5121;5122;5123;5124;5125;5126;5127;5128;5129;5130;5313;5314;5315;5316;5317;7111;7112;8841;8842;10614;10615;11629;11630;12056;12057;12058;12059;12060;12061;12062;13387;13388;13389;13390;13841;13842;14085;14086;14926;14927;15990;15991;15992;15993;16030;16031;16032;16033;16034…	2781;2782;2783;2784;2785;2786;2787;3195;3273;3274;3416;3532;3533;3534;3535;3536;3537;4740;4741;4742;4743;4744;4745;4746;4747;4748;4749;4750;4751;4752;4753;4754;4939;4940;4941;4942;4943;6590;6591;8151;9805;9806;10766;10767;11187;11188;11189;11190;11191;11192;11193;12584;12585;12993;12994;13220;13221;13991;14955;14956;14957;14958;14993;14994;14995;14996;14997;14998;14999;15000;15001;15002;15003;150…	2787;3195;3273;3274;3416;3533;3536;4740;4943;6591;8151;9806;10767;11189;12584;12994;13221;13991;14957;15004;15786;15798;16325;16774;18261;18263;18868;18870	113;114;115;116;117;118;119	155;199;206;274;292;402;408
SPBC839.13c|rpl1601|II|60S;SPAC23A1.11|rpl1602|I|60S;SPBC2G2.05|rpl1603|II|60S	SPBC839.13c|rpl1601|II|60S;SPAC23A1.11|rpl1602|I|60S	5;5;2	5;5;2	5;5;2	>SPBC839.13c|rpl1601|II|60S ribosomal protein L13/L16 (predicted);>SPAC23A1.11|rpl1602|I|60S ribosomal protein L13/L16 (predicted)	3	5	5	5	5	4	5	4	5	4	24.9	24.9	24.9	22.17	197	197;197;197	0	16.741	By MS/MS	By MS/MS	24.9	20.8	104280000	53399000	50883000	47481000	53209000	4	4	8				293	815;2689;5232;6632;8804	True;True;True;True;True	852;2809;5474;6991;9272	1757;1758;5623;5624;10960;14489;14490;19144;19145	1612;1613;5209;5210;10118;13589;17878;17879	1612;5209;10118;13589;17879
SPAC23A1.12c|frs1|I|cytoplasmic	SPAC23A1.12c|frs1|I|cytoplasmic	6	6	6	>SPAC23A1.12c|frs1|I|cytoplasmic phenylalanine-tRNA ligase beta subunit Frs1 (predicted)	1	6	6	6	5	6	5	6	5	6	14.6	14.6	14.6	66.849	589	589	0	15.711	By MS/MS	By MS/MS	11.5	14.6	79601000	31624000	47977000	31645000	45829000	4	6	10				294	3124;4859;7262;7733;7768;8302	True;True;True;True;True;True	3261;5083;7650;8146;8181;8748	6600;10212;10213;15815;15816;16845;16846;16913;16914;18122;18123	6117;9434;9435;14803;14804;15747;15748;15810;16943;16944	6117;9434;14803;15748;15810;16944
SPAC23A1.14c|SPAC23A1.14c|I|uncharacterised	SPAC23A1.14c|SPAC23A1.14c|I|uncharacterised	5	5	5	>SPAC23A1.14c|SPAC23A1.14c|I|uncharacterised trans-sulfuration enzyme (predicted)	1	5	5	5	4	4	4	4	4	4	18.8	18.8	18.8	43.284	398	398	0	18.066	By MS/MS	By MS/MS	14.6	16.1	61114000	31011000	30104000	23975000	35054000	3	4	7				295	797;3098;4224;5196;9158	True;True;True;True;True	834;3235;4423;5437;9642	1714;1715;6546;6547;8981;10887;19964;19965	1574;1575;6069;6070;8280;10050;18739	1575;6070;8280;10050;18739
SPAC23A1.17|bbc1|I|WIP	SPAC23A1.17|bbc1|I|WIP	11	11	11	>SPAC23A1.17|bbc1|I|WIP family cytoskeletal protein Bbc1 (predicted)	1	11	11	11	9	10	9	10	9	10	10.8	10.8	10.8	170.53	1611	1611	0	62.892	By MS/MS	By MS/MS	9.7	9.3	179230000	86260000	92971000	81627000	91802000	8	8	16				296	576;3358;3756;4118;6053;6092;6442;7289;7416;8033;8961	True;True;True;True;True;True;True;True;True;True;True	599;3506;3928;4309;6380;6426;6796;7679;7810;8465;9436	1247;1248;1249;7063;7951;8744;8745;13182;13183;13298;13299;14060;15870;15871;16133;16134;17525;17526;19478;19479	1144;1145;1146;6550;7359;8071;8072;12378;12379;12494;12495;13199;14851;14852;15087;15088;16374;18186	1146;6550;7359;8071;12378;12494;13199;14852;15087;16374;18186	120	1389
SPBP4H10.13|rps2302|II|40S;SPAC23C11.02c|rps23|I|40S	SPBP4H10.13|rps2302|II|40S;SPAC23C11.02c|rps23|I|40S	4;4	4;4	4;4	>SPBP4H10.13|rps2302|II|40S ribosomal protein S23 (predicted);>SPAC23C11.02c|rps23|I|40S ribosomal protein S23 (predicted)	2	4	4	4	4	3	4	3	4	3	41.3	41.3	41.3	15.655	143	143;143	0	15.411	By MS/MS	By MS/MS	41.3	22.4	24670000	7546300	17123000	10242000	13920000	2	4	6				297	4790;7275;8089;8685	True;True;True;True	5011;7665;8522;9150	10081;10082;15846;15847;17644;17645;17646;18901	9313;9314;14831;16487;16488;17659	9314;14831;16487;17659
SPAC23C11.05|ipp1|I|inorganic	SPAC23C11.05|ipp1|I|inorganic	6	6	6	>SPAC23C11.05|ipp1|I|inorganic pyrophosphatase Ipp1 (predicted)	1	6	6	6	6	4	6	4	6	4	25.6	25.6	25.6	32.467	289	289	0	16.426	By MS/MS	By MS/MS	25.6	17.3	81260000	36426000	44834000	31689000	40314000	6	4	10				298	2392;3049;4957;5741;7684;8386	True;True;True;True;True;True	2505;3185;5190;6054;8091;8092;8838	4926;6417;6418;10423;12513;12514;16709;16710;16711;16712;18315;18316	4566;5942;5943;9631;11765;11766;15620;15621;17118;17119	4566;5943;9631;11765;15620;17119	121	47
SPAC23C11.09|ala1|I|mitochondrial	SPAC23C11.09|ala1|I|mitochondrial	3	3	3	>SPAC23C11.09|ala1|I|mitochondrial and cytoplasmic alanine-tRNA ligase Ala1 (predicted)	1	3	3	3	3	2	3	2	3	2	3.4	3.4	3.4	107.38	959	959	0	4.2165	By MS/MS	By MS/MS	3.4	2.2	28999000	19476000	9523600	11757000	15933000	1	2	3				299	482;726;1963	True;True;True	503;757;2062	1075;1076;1553;4019;4020	987;988;1422;3734;3735	988;1422;3734
SPAC23C11.11|cka1|I|serine/threonine	SPAC23C11.11|cka1|I|serine/threonine	7	7	7	>SPAC23C11.11|cka1|I|serine/threonine protein kinase Cka1	1	7	7	7	7	5	7	5	7	5	21.4	21.4	21.4	39.527	332	332	0	16.357	By MS/MS	By MS/MS	21.4	15.4	67365000	42024000	25341000	36767000	27772000	7	6	13				300	2665;6515;6989;7799;8435;9256;9372	True;True;True;True;True;True;True	2784;6872;7368;8214;8891;9744;9862	5575;5576;14250;14251;14252;14253;15272;17003;17004;18410;18411;20161;20416;20417	5175;13381;13382;13383;13384;14305;15903;15904;15905;17207;18922;19166;19167	5175;13382;14305;15904;17207;18922;19167
SPAC23C11.14|zhf1|I|zinc	SPAC23C11.14|zhf1|I|zinc	3	3	3	>SPAC23C11.14|zhf1|I|zinc ion transmembrane transporter Zhf1	1	3	3	3	3	3	3	3	3	3	13.2	13.2	13.2	42.941	387	387	0	21.739	By MS/MS	By MS/MS	13.2	13.2	234080000	126480000	107600000	100120000	125450000	4	3	7				301	4333;6643;9312	True;True;True	4538;7003;9801	9192;9193;9194;14519;14520;20289;20290	8478;8479;8480;13613;13614;19042;19043	8478;13614;19042
SPAC23C11.15|pst2|I|Clr6	SPAC23C11.15|pst2|I|Clr6	4	4	4	>SPAC23C11.15|pst2|I|Clr6 histone deacetylase complex subunit Pst2	1	4	4	4	3	3	3	3	3	3	4.2	4.2	4.2	124.85	1075	1075	0	11.731	By MS/MS	By MS/MS	3.2	3.3	20514000	8485400	12029000	7914700	0	2	1	3				302	455;2055;4842;6069	True;True;True;True	475;2155;5066;6400	1021;4243;4244;10180;13245;13246	942;3942;3943;9407;12435;12436	942;3942;9407;12435
SPAC23C11.16|plo1|I|Polo	SPAC23C11.16|plo1|I|Polo	28	28	28	>SPAC23C11.16|plo1|I|Polo kinase Plo1	1	28	28	28	28	13	28	13	28	13	44.5	44.5	44.5	77.301	683	683	0	105.79	By MS/MS	By MS/MS	44.5	21.4	675150000	603420000	71726000	489520000	107180000	34	5	39				303	545;1214;1381;1681;3373;3374;3399;3577;4022;4023;4317;4541;5215;5216;5605;5831;6004;6373;6693;6718;7044;7451;7526;8203;8482;8770;9020;9184	True;True;True;True;True;True;True;True;True;True;True;True;True;True;True;True;True;True;True;True;True;True;True;True;True;True;True;True	566;1277;1454;1769;3521;3522;3547;3735;4207;4208;4522;4759;4760;5456;5457;5903;6146;6330;6331;6724;7057;7082;7423;7846;7925;8643;8939;9237;9496;9668;9669	1187;1188;2573;2574;2876;3456;3457;7089;7090;7139;7540;7541;8510;8511;8512;8513;9166;9619;9620;10925;10926;10927;10928;10929;12023;12703;12704;12705;13080;13081;13082;13925;14627;14628;14629;14630;14675;14676;15376;15377;16197;16349;17918;18499;19077;19602;20009;20010;20011	1088;1089;1090;2371;2654;3205;6570;6571;6614;6976;7860;7861;8453;8881;8882;10087;10088;10089;10090;11157;11939;11940;12293;12294;13080;13716;13717;13718;13757;13758;14404;14405;15144;15281;16752;17282;17820;18291;18775;18776;18777	1089;2371;2654;3205;6570;6571;6614;6976;7860;7861;8453;8881;10087;10090;11157;11939;12294;13080;13716;13758;14405;15144;15281;16752;17282;17820;18291;18776	122;123;124;125;126;127	144;145;170;189;597;600
SPAC23C4.02|crn1|I|actin	SPAC23C4.02|crn1|I|actin	1	1	1	>SPAC23C4.02|crn1|I|actin binding protein, coronin Crn1	1	1	1	1	1	1	1	1	1	1	1.5	1.5	1.5	67.015	601	601	0.0008071	2.1178	By MS/MS	By MS/MS	1.5	1.5	13794000	6046300	7747600	0	7747600	1	1	2				304	8806	TRUE	9274	19148;19149	17883;17884	17884
SPAC23C4.05c|SPAC23C4.05c|I|LEA	SPAC23C4.05c|SPAC23C4.05c|I|LEA	4	4	4	>SPAC23C4.05c|SPAC23C4.05c|I|LEA domain protein	1	4	4	4	4	4	4	4	4	4	10	10	10	49.532	431	431	0	11.078	By MS/MS	By MS/MS	10	10	52692000	27546000	25146000	25381000	25459000	3	4	7				305	1479;3436;4850;5795	True;True;True;True	1560;3588;5074;6110	3081;3082;7227;7228;10195;10196;12632;12633	2854;2855;6690;9419;9420;11874;11875	2854;6690;9420;11874
SPAC23C4.08|rho3|I|Rho	SPAC23C4.08|rho3|I|Rho	2	2	2	>SPAC23C4.08|rho3|I|Rho family GTPase Rho3	1	2	2	2	1	2	1	2	1	2	7.8	7.8	7.8	22.501	205	205	0	2.5153	By MS/MS	By MS/MS	4.4	7.8	7192300	3539400	3653000	0	3653000	0	1	1				306	5386;7921	True;True	5629;8345	11274;17286;17287	10405;16152;16153	10405;16153
SPAC23C4.12|hhp2|I|serine/threonine	SPAC23C4.12|hhp2|I|serine/threonine	16	16	15	>SPAC23C4.12|hhp2|I|serine/threonine protein kinase Hhp2	1	16	16	15	15	11	15	11	14	10	52.5	52.5	49.5	45.831	400	400	0	65.113	By MS/MS	By MS/MS	51.8	31.5	621400000	448080000	173320000	378980000	192480000	20	8	28				307	1018;2604;2638;2726;2967;3106;3322;3405;3408;6366;6509;7182;7659;7660;7864;8006	True;True;True;True;True;True;True;True;True;True;True;True;True;True;True;True	1070;1071;2721;2756;2848;3099;3243;3466;3553;3556;6716;6866;7566;8066;8067;8284;8435	2181;2182;2183;2184;2185;5449;5514;5515;5698;5699;6232;6233;6234;6235;6563;6564;6989;7149;7154;7155;13909;13910;13911;13912;14238;15652;15653;16638;16639;16640;17176;17462;17463;17464	2011;2012;2013;2014;2015;5061;5119;5120;5275;5276;5770;5771;6084;6085;6483;6622;6626;13069;13070;13071;13370;14657;14658;15551;15552;15553;16050;16318;16319;16320	2011;5061;5119;5276;5771;6085;6483;6622;6626;13069;13370;14658;15552;15553;16050;16319	128	139
SPAC23C4.15|rpb5|I|DNA-directed	SPAC23C4.15|rpb5|I|DNA-directed	2	2	2	>SPAC23C4.15|rpb5|I|DNA-directed RNA polymerase I, II and III subunit Rpb5	1	2	2	2	2	1	2	1	2	1	10.5	10.5	10.5	23.915	210	210	0.00522	1.5266	By MS/MS	By MS/MS	10.5	5.7	5006300	1766900	3239400	1648100	0	2	2	4				308	2989;7600	True;True	3124;8005	6289;16511;16512;16513	5822;15438;15439;15440	5822;15438
SPAC23D3.03c|SPAC23D3.03c|I|GTPase	SPAC23D3.03c|SPAC23D3.03c|I|GTPase	2	2	2	>SPAC23D3.03c|SPAC23D3.03c|I|GTPase activating protein (predicted)	1	2	2	2	2	1	2	1	2	1	4.4	4.4	4.4	54.318	472	472	0	3.6269	By MS/MS	By MS/MS	4.4	1.5	8012000	5747000	2264900	5360500	0	2	1	3				309	1078;4403	True;True	1131;4612	2296;2297;9307	2119;2120;8586	2119;8586
SPAC23D3.04c|gpd2|I|glycerol-3-phosphate	SPAC23D3.04c|gpd2|I|glycerol-3-phosphate	5	5	5	>SPAC23D3.04c|gpd2|I|glycerol-3-phosphate dehydrogenase Gpd2	1	5	5	5	4	4	4	4	4	4	18.5	18.5	18.5	40.874	373	373	0	20.25	By MS/MS	By MS/MS	13.9	13.1	55296000	29251000	26045000	28810000	23608000	4	3	7				310	1851;3398;5803;7691;8645	True;True;True;True;True	1943;3546;6118;8100;9109	3769;7137;7138;12644;16728;16729;16730;18825;18826	3487;6613;11886;15636;15637;15638;17585;17586	3487;6613;11886;15636;17586
SPAC23D3.06c|nup146|I|nucleoporin	SPAC23D3.06c|nup146|I|nucleoporin	20	20	20	>SPAC23D3.06c|nup146|I|nucleoporin Nup146	1	20	20	20	20	2	20	2	20	2	22.1	22.1	22.1	145.78	1325	1325	0	94.456	By MS/MS	By matching	22.1	1.9	231740000	224970000	6764600	208960000	7650600	20	0	20				311	498;630;729;1109;2014;2169;3147;3369;4334;4416;4620;5724;5840;5876;5967;6280;7013;7027;7077;7166	True;True;True;True;True;True;True;True;True;True;True;True;True;True;True;True;True;True;True;True	519;655;760;1163;2114;2276;3285;3517;4539;4625;4840;6037;6155;6191;6292;6625;7392;7406;7458;7548	1104;1359;1557;1558;2360;4163;4471;6644;7082;9195;9322;9772;12484;12722;12797;13009;13010;13705;13706;15320;15345;15440;15623	1014;1241;1426;1427;2176;3870;4145;6158;6565;8481;8602;9023;11740;11958;12029;12226;12870;14351;14352;14375;14459;14628	1014;1241;1426;2176;3870;4145;6158;6565;8481;8602;9023;11740;11958;12029;12226;12870;14352;14375;14459;14628
SPAC23D3.07|pup1|I|20S	SPAC23D3.07|pup1|I|20S	1	1	1	>SPAC23D3.07|pup1|I|20S proteasome complex subunit beta 2 (predicted)	1	1	1	1	1	1	1	1	1	1	3.7	3.7	3.7	29.337	267	267	0.0037879	1.6042	By matching	By MS/MS	3.7	3.7	4730900	2307300	2423600	0	2423600	0	1	1				312	3994	TRUE	4177	8451;8452	7810	7810
SPAC23E2.03c|ste7|I|arrestin	SPAC23E2.03c|ste7|I|arrestin	1	1	1	>SPAC23E2.03c|ste7|I|arrestin family meiotic suppressor protein Ste7	1	1	1	1	1	1	1	1	1	1	2.3	2.3	2.3	61.101	569	569	0.0015736	1.9182	By matching	By MS/MS	2.3	2.3	3122300	966930	2155400	0	2155400	0	1	1				313	1394	TRUE	1468	2896;2897	2672	2672
SPAC23G3.01|rpb2|I|RNA	SPAC23G3.01|rpb2|I|RNA	31	31	31	>SPAC23G3.01|rpb2|I|RNA polymerase II complex subunit Rpb2	1	31	31	31	29	22	29	22	29	22	30.9	30.9	30.9	137.85	1210	1210	0	105.65	By MS/MS	By MS/MS	28.8	21.5	510580000	290920000	219670000	250640000	234400000	29	20	49				314	42;162;691;906;995;1160;1459;1570;2412;2683;3044;3244;4352;4781;5329;5555;5610;5883;6181;6556;6635;6644;6717;7299;7498;8304;8637;8649;8977;9277;9294	True;True;True;True;True;True;True;True;True;True;True;True;True;True;True;True;True;True;True;True;True;True;True;True;True;True;True;True;True;True;True	42;171;720;951;1046;1221;1539;1655;2525;2803;3180;3386;4558;5002;5572;5832;5910;6199;6520;6521;6914;6994;7004;7081;7689;7895;8750;9101;9113;9452;9766;9783	93;411;412;1492;1493;1959;2137;2472;3043;3258;3259;4979;4980;4981;4982;5611;5612;6405;6406;6841;6842;9223;9224;10065;11145;11146;11147;11148;11788;11789;12035;12036;12808;13499;13500;13501;13502;14338;14496;14497;14521;14522;14673;14674;15889;15890;16291;16292;18125;18126;18806;18833;19506;19507;20203;20250;20251	82;380;1367;1368;1805;1968;2279;2819;3014;3015;4621;4622;4623;4624;5201;5931;5932;6348;6349;8508;8509;9297;10283;10284;10285;10286;10915;10916;10917;11169;11170;12039;12680;12681;12682;12683;13456;13594;13615;13616;13755;13756;14869;14870;15229;15230;16946;16947;17568;17593;18207;18960;19006;19007	82;380;1367;1805;1968;2279;2819;3015;4622;5201;5932;6349;8508;9297;10283;10915;11169;12039;12681;13456;13594;13616;13755;14870;15230;16947;17568;17593;18207;18960;19007	129;130	767;1198
SPAC23G3.02c|sib1|I|ferrichrome	SPAC23G3.02c|sib1|I|ferrichrome	20	20	20	>SPAC23G3.02c|sib1|I|ferrichrome synthetase Sib1	1	20	20	20	15	13	15	13	15	13	5.1	5.1	5.1	559.84	4924	4924	0	35.534	By MS/MS	By MS/MS	3.8	3.6	114300000	58719000	55579000	54150000	56199000	11	9	20				315	1253;1604;2147;2247;3438;3513;4250;4587;4759;5270;5811;6064;6485;6819;7015;7763;8171;8910;9178;9220	True;True;True;True;True;True;True;True;True;True;True;True;True;True;True;True;True;True;True;True	1320;1689;2251;2355;3590;3668;4450;4807;4979;5512;6126;6393;6840;7192;7394;8176;8608;9382;9662;9705	2641;2642;3318;3319;4421;4656;7233;7415;9024;9715;10027;11029;11030;12657;13208;14182;14183;14891;14892;15322;15323;16905;16906;17849;19364;19998;20073;20074	2433;2434;3070;3071;4100;4326;6695;6864;8321;8972;9262;10177;11897;12402;13322;13960;14354;15803;15804;16683;18082;18765;18833	2433;3071;4100;4326;6695;6864;8321;8972;9262;10177;11897;12402;13322;13960;14354;15803;16683;18082;18765;18833
SPAC23G3.03|sib2|I|ornithine	SPAC23G3.03|sib2|I|ornithine	8	8	8	>SPAC23G3.03|sib2|I|ornithine N5 monooxygenase (predicted)	1	8	8	8	6	8	6	8	6	8	30.4	30.4	30.4	48.582	431	431	0	47.015	By MS/MS	By MS/MS	24.1	30.4	247970000	92422000	155550000	93571000	148180000	7	10	17				316	1169;1545;1696;5828;7361;7856;7972;8843	True;True;True;True;True;True;True;True	1230;1629;1784;6143;7754;8276;8401;9313	2490;2491;2492;2493;3206;3207;3208;3479;12698;12699;16022;16023;17158;17159;17392;17393;19221;19222	2296;2297;2298;2299;2969;2970;2971;3222;11934;11935;14986;14987;16035;16251;16252;17953;17954	2297;2970;3222;11934;14986;16035;16252;17954
SPAC23G3.06|nop58|I|U3	SPAC23G3.06|nop58|I|U3	10	10	10	>SPAC23G3.06|nop58|I|U3 snoRNP protein Nop58 (predicted)	1	10	10	10	9	8	9	8	9	8	25.8	25.8	25.8	55.758	508	508	0	35.889	By MS/MS	By MS/MS	22.6	20.5	196060000	117030000	79034000	91242000	88904000	11	9	20				317	601;884;3482;4597;4854;5233;5581;6395;8155;9080	True;True;True;True;True;True;True;True;True;True	625;924;3635;4817;5078;5475;5869;5870;6748;8592;9559	1298;1299;1902;7331;7332;9734;9735;10202;10203;10204;10961;10962;11954;11955;11956;11957;11958;11959;13967;13968;17822;19794	1188;1753;6787;6788;8990;8991;9425;9426;9427;10119;10120;11091;11092;11093;11094;11095;13117;13118;16661;18577	1188;1753;6787;8990;9427;10119;11091;13118;16661;18577	131;132	280;307
SPAC23G3.08c|ubp7|I|ubiquitin	SPAC23G3.08c|ubp7|I|ubiquitin	1	1	1	>SPAC23G3.08c|ubp7|I|ubiquitin C-terminal hydrolase Ubp7	1	1	1	1	1	0	1	0	1	0	1.4	1.4	1.4	98.376	875	875	0	6.9005	By MS/MS	By matching	1.4	0	0	0	0	0	0	1	0	1				318	4815	TRUE	5038	10127	9359	9359
SPAC23G3.10c|ssr3|I|SWI/SNF	SPAC23G3.10c|ssr3|I|SWI/SNF	3	3	3	>SPAC23G3.10c|ssr3|I|SWI/SNF and RSC complex subunit Ssr3	1	3	3	3	3	3	3	3	3	3	5.4	5.4	5.4	49.759	425	425	0	11.929	By MS/MS	By MS/MS	5.4	5.4	29330000	14887000	14443000	12787000	15542000	3	2	5				319	148;3199;8703	True;True;True	157;3339;9168	381;382;6741;6742;18943;18944	352;353;6254;6255;17693;17694	353;6254;17693
SPAC23G3.11|rpn6|I|19S	SPAC23G3.11|rpn6|I|19S	4	4	4	>SPAC23G3.11|rpn6|I|19S proteasome regulatory subunit Rpn6 (predicted)	1	4	4	4	4	4	4	4	4	4	15	15	15	47.341	421	421	0	22.249	By MS/MS	By MS/MS	15	15	60132000	25550000	34581000	21969000	36444000	3	3	6				320	467;5559;6896;8109	True;True;True;True	488;5836;7272;8543	1045;1046;11794;11795;15057;15058;17690;17691	962;10923;10924;14108;14109;16527;16528	962;10923;14108;16527
SPAC23H3.09c|gly1|I|threonine	SPAC23H3.09c|gly1|I|threonine	4	4	4	>SPAC23H3.09c|gly1|I|threonine aldolase Gly1 (predicted)	1	4	4	4	4	4	4	4	4	4	12.8	12.8	12.8	41.318	376	376	0	5.6902	By MS/MS	By MS/MS	12.8	12.8	34652000	14796000	19856000	17055000	16602000	3	3	6				321	3850;4052;6853;6893	True;True;True;True	4028;4239;7227;7269	8136;8137;8595;8596;14966;14967;15051;15052;15053;15054	7525;7526;7939;14029;14030;14103;14104;14105	7526;7939;14030;14103
SPAC23H3.10|ssr2|I|SWI/SNF	SPAC23H3.10|ssr2|I|SWI/SNF	5	5	5	>SPAC23H3.10|ssr2|I|SWI/SNF and RSC complex subunit Ssr2	1	5	5	5	5	3	5	3	5	3	10.1	10.1	10.1	57.684	503	503	0	11.49	By MS/MS	By MS/MS	10.1	6	38265000	26022000	12244000	18665000	17850000	3	2	5				322	4408;4596;5354;5887;8137	True;True;True;True;True	4617;4816;5597;6203;8572	9313;9733;11194;11195;12815;12816;17782;17783	8593;8989;10330;10331;12045;12046;16627	8593;8989;10330;12046;16627
SPAC23H3.13c|gpa2|I|heterotrimeric	SPAC23H3.13c|gpa2|I|heterotrimeric	2	2	2	>SPAC23H3.13c|gpa2|I|heterotrimeric G protein alpha-2 subunit Gpa2	1	2	2	2	2	1	2	1	2	1	7.3	7.3	7.3	40.522	354	354	0	4.3283	By MS/MS	By matching	7.3	2	38423000	31571000	6852200	29447000	0	2	0	2				323	6002;8757	True;True	6328;9223	13077;19049;19050	12290;17793	12290;17793
SPAC23H4.01c|osh3|I|sterol	SPAC23H4.01c|osh3|I|sterol	8	8	8	>SPAC23H4.01c|osh3|I|sterol binding ankyrin repeat protein Osh3	1	8	8	8	8	6	8	6	8	6	11.6	11.6	11.6	106.81	945	945	0	36.356	By MS/MS	By MS/MS	11.6	8.3	88868000	46647000	42221000	35767000	49963000	6	5	11				324	275;6097;6681;7173;7363;7882;8017;8144	True;True;True;True;True;True;True;True	289;6431;7045;7557;7756;8304;8449;8579	632;633;13308;13309;14600;14601;15636;16028;16029;17217;17491;17492;17493;17494;17795;17796;17797;17798	581;582;12503;12504;13691;13692;14643;14991;14992;16087;16345;16346;16347;16348;16637;16638	582;12503;13691;14643;14992;16087;16348;16638
SPAC23H4.03c|erv25|I|COPII-coated	SPAC23H4.03c|erv25|I|COPII-coated	1	1	1	>SPAC23H4.03c|erv25|I|COPII-coated vesicle component Erv25 (predicted)	1	1	1	1	1	1	1	1	1	1	3.7	3.7	3.7	24.485	216	216	0	2.5399	By MS/MS	By MS/MS	3.7	3.7	10661000	4497600	6163400	0	6163400	1	1	2				325	5891	TRUE	6207	12821;12822	12050;12051	12051
SPAC23H4.06|gln1|I|glutamate-ammonia	SPAC23H4.06|gln1|I|glutamate-ammonia	5	5	5	>SPAC23H4.06|gln1|I|glutamate-ammonia ligase Gln1	1	5	5	5	5	2	5	2	5	2	18.1	18.1	18.1	40.018	359	359	0	14.058	By MS/MS	By MS/MS	18.1	8.6	43773000	29119000	14655000	15064000	26751000	3	2	5				326	299;2914;7210;7808;8510	True;True;True;True;True	313;3043;7597;8224;8968	673;6116;6117;15710;17017;17018;18556	621;5666;5667;14712;15917;17335	621;5667;14712;15917;17335
SPAC23H4.10c|thi4|I|bifunctional	SPAC23H4.10c|thi4|I|bifunctional	9	9	9	>SPAC23H4.10c|thi4|I|bifunctional thiamine-phosphate dipyrophosphorylase/hydroxyethylthiazole kinase	1	9	9	9	9	9	9	9	9	9	24.9	24.9	24.9	55.565	518	518	0	40.811	By MS/MS	By MS/MS	24.9	24.9	143190000	80971000	62221000	73940000	63806000	9	8	17				327	0;1102;2771;4627;4710;5846;6159;6460;8359	True;True;True;True;True;True;True;True;True	0;1156;2897;4847;4930;6161;6497;6815;8809	0;1;2347;2348;5809;5810;5811;5812;9784;9785;9940;9941;12734;12735;13453;13454;13455;13456;14094;14095;18255;18256	0;2164;5377;5378;5379;5380;9035;9036;9182;11969;11970;12642;12643;12644;13229;13230;17066;17067	0;2164;5379;9035;9182;11970;12644;13229;17066
SPAC23H4.14|vam6|I|guanyl-nucleotide	SPAC23H4.14|vam6|I|guanyl-nucleotide	2	2	2	>SPAC23H4.14|vam6|I|guanyl-nucleotide exchange factor, HOPS complex subunit Vam6 (predicted)	1	2	2	2	2	1	2	1	2	1	1.7	1.7	1.7	103.69	905	905	0.0065982	1.393	By MS/MS	By MS/MS	1.7	0.8	3307800	3307800	0	3085300	0	2	1	3				328	8244;8656	True;True	8686;9120	18002;18003;18844	16832;16833;17604	16833;17604
SPAC24B11.05|SPAC24B11.05|I|pyrimidine	SPAC24B11.05|SPAC24B11.05|I|pyrimidine	6	6	6	>SPAC24B11.05|SPAC24B11.05|I|pyrimidine 5-nucleotidase (predicted)	1	6	6	6	5	3	5	3	5	3	32.7	32.7	32.7	26.513	226	226	0	10.98	By MS/MS	By MS/MS	29.6	20.4	60381000	38426000	21956000	30779000	27018000	5	2	7				329	1612;2621;3164;3463;3803;9310	True;True;True;True;True;True	1698;2738;3303;3616;3977;9799	3336;5479;5480;6681;7286;8042;20284;20285	3088;5090;6195;6747;7443;19038;19039	3088;5090;6195;6747;7443;19038
SPAC24B11.06c|sty1|I|MAP	SPAC24B11.06c|sty1|I|MAP	5	4	4	>SPAC24B11.06c|sty1|I|MAP kinase Sty1	1	5	4	4	4	5	3	4	3	4	14	11.7	11.7	40.222	349	349	0	8.0952	By MS/MS	By MS/MS	12	14	39211000	17580000	21632000	14559000	23471000	1	4	5				330	1092;2284;2302;3236;5565	True;True;True;False;True	1145;2393;2411;3378;5844	2323;2324;4720;4721;4750;4751;6824;6825;11808	2145;2146;4384;4385;4411;4412;6333;6334;10936	2145;4384;4411;6334;10936
SPAC24B11.07c|SPAC24B11.07c|I|oxidoreductase	SPAC24B11.07c|SPAC24B11.07c|I|oxidoreductase	2	2	2	>SPAC24B11.07c|SPAC24B11.07c|I|oxidoreductase (predicted)	1	2	2	2	1	2	1	2	1	2	5.2	5.2	5.2	62.463	561	561	0	2.9855	By MS/MS	By MS/MS	2.7	5.2	7690200	4024300	3665900	0	3665900	0	1	1				331	1725;5722	True;True	1814;6035	3529;12481;12482	3269;11738	3269;11738
SPAC24B11.08c|SPAC24B11.08c|I|COPII-coated	SPAC24B11.08c|SPAC24B11.08c|I|COPII-coated	3	3	3	>SPAC24B11.08c|SPAC24B11.08c|I|COPII-coated vesicle component Erv46 (predicted)	1	3	3	3	3	2	3	2	3	2	10.5	10.5	10.5	43.707	390	390	0	8.6849	By MS/MS	By MS/MS	10.5	6.9	29703000	15904000	13799000	12888000	15746000	1	3	4				332	5491;8194;8324	True;True;True	5740;8634;8770	11512;11513;17901;18170;18171;18172;18173	10631;16736;16987;16988	10631;16736;16988	133	208
SPAC24B11.09|mpc2|I|mitochondrial	SPAC24B11.09|mpc2|I|mitochondrial	1	1	1	>SPAC24B11.09|mpc2|I|mitochondrial pyruvate transmembrane transporter Mpc2 (predicted)	1	1	1	1	1	1	1	1	1	1	7.6	7.6	7.6	13.536	118	118	0.003785	1.6025	By MS/MS	By MS/MS	7.6	7.6	5711700	1485600	4226100	1397200	4214600	2	1	3				333	2315	TRUE	2424	4776;4777;4778;4779	4433;4434;4435	4433
SPAC24B11.11c|sid2|I|NDR	SPAC24B11.11c|sid2|I|NDR	7	7	7	>SPAC24B11.11c|sid2|I|NDR kinase Sid2	1	7	7	7	6	5	6	5	6	5	14.2	14.2	14.2	70.491	607	607	0	22.329	By MS/MS	By MS/MS	12.5	9.4	71981000	42372000	29610000	38347000	30785000	5	4	9				334	1085;2949;4439;5052;5265;5634;7766	True;True;True;True;True;True;True	1138;3078;4651;5289;5507;5944;8179	2310;2311;6182;9406;10601;10602;11019;11020;12097;12098;16910	2133;2134;5722;8686;9793;9794;10168;10169;11225;15807	2133;5722;8686;9793;10168;11225;15807
SPAC24C9.03|mvd1|I|diphosphomevalonate	SPAC24C9.03|mvd1|I|diphosphomevalonate	1	1	1	>SPAC24C9.03|mvd1|I|diphosphomevalonate decarboxylase mvd1 (predicted)	1	1	1	1	0	1	0	1	0	1	2.5	2.5	2.5	42.755	393	393	0.0086518	1.3019	By matching	By MS/MS	0	2.5	1195100	0	1195100	0	1195100	0	1	1				335	8134	TRUE	8569	17777	16623	16623
SPAC24C9.06c|aco1|I|aconitate	SPAC24C9.06c|aco1|I|aconitate	9	9	9	>SPAC24C9.06c|aco1|I|aconitate hydratase Aco1 (predicted)	1	9	9	9	9	9	9	9	9	9	15.7	15.7	15.7	86.112	789	789	0	23.985	By MS/MS	By MS/MS	15.7	15.7	161190000	88638000	72554000	74115000	81114000	6	9	15				336	1774;2834;3611;4979;6259;8011;8087;8958;9173	True;True;True;True;True;True;True;True;True	1865;2961;3771;5212;6604;8443;8520;9433;9657	3618;3619;5935;5936;7606;7607;10459;10460;10461;10462;13657;13658;17478;17479;17641;17642;19472;19473;19988;19989	3351;5498;5499;7035;9660;9661;9662;12826;12827;16333;16334;16484;16485;18180;18181;18757;18758	3351;5498;7035;9660;12827;16333;16485;18181;18758
SPAC24C9.08|cps1|I|vacuolar	SPAC24C9.08|cps1|I|vacuolar	2	2	2	>SPAC24C9.08|cps1|I|vacuolar carboxypeptidase (predicted)	1	2	2	2	2	1	2	1	2	1	4.5	4.5	4.5	66.606	596	596	0	13.258	By MS/MS	By MS/MS	4.5	2.5	8936100	8936100	0	8335100	0	2	1	3				337	4495;8518	True;True	4710;8977	9523;18569;18570	8791;17348;17349	8791;17348
SPAC24C9.12c|shm1|I|serine	SPAC24C9.12c|shm1|I|serine	30	30	29	>SPAC24C9.12c|shm1|I|serine hydroxymethyltransferase Shm1 (predicted)	1	30	30	29	29	27	29	27	28	26	80.1	80.1	78.2	51.86	467	467	0	291.43	By MS/MS	By MS/MS	79.7	77.1	8121800000	4172000000	3949800000	3436200000	3354200000	60	59	119				338	365;366;493;755;1738;1799;1987;2359;2644;2645;3603;3638;3742;4027;4197;4504;4938;4939;6272;6656;7270;7271;7292;8140;8178;8298;8422;8747;8877;9268	True;True;True;True;True;True;True;True;True;True;True;True;True;True;True;True;True;True;True;True;True;True;True;True;True;True;True;True;True;True	382;383;514;789;790;1827;1890;2087;2469;2470;2762;2763;3761;3801;3911;3912;4212;4213;4394;4395;4720;5165;5166;5167;5168;6617;7016;7658;7659;7660;7661;7682;8575;8616;8617;8743;8744;8878;9213;9348;9349;9757	812;813;814;1094;1095;1625;1626;1627;1628;1629;1630;1631;1632;3550;3551;3552;3553;3667;3668;4114;4115;4862;4863;4864;4865;5526;5527;5528;5529;5530;7588;7589;7656;7657;7658;7659;7894;7895;7896;7897;7898;7899;7900;7901;8523;8524;8525;8526;8920;8921;8922;8923;8924;8925;8926;9543;9544;9545;9546;10367;10368;10369;10370;10371;10372;10373;10374;10375;10376;10377;10378;10379;10380;10381;10382;10383;10384…	746;747;748;1005;1006;1491;1492;1493;1494;1495;1496;3288;3289;3290;3291;3292;3394;3828;4505;4506;4507;4508;5129;5130;5131;5132;5133;5134;7018;7019;7080;7081;7082;7300;7301;7302;7303;7304;7305;7306;7307;7870;7871;7872;7873;8221;8222;8223;8224;8225;8226;8227;8810;8811;8812;8813;9576;9577;9578;9579;9580;9581;9582;9583;9584;9585;9586;9587;9588;9589;9590;9591;9592;9593;9594;9595;12852;12853;12854;1285…	746;747;1006;1496;3288;3394;3828;4507;5129;5131;7018;7081;7304;7872;8226;8812;9582;9584;12852;13629;14815;14818;14859;16631;16709;16935;17184;17776;18027;18949	134;135;136;137;138;139;140;141;142;143;144;145	8;23;48;55;111;118;125;156;171;252;343;393
SPAC24C9.16c|cox8|I|cytochrome	SPAC24C9.16c|cox8|I|cytochrome	1	1	1	>SPAC24C9.16c|cox8|I|cytochrome c oxidase subunit VIII (predicted)	1	1	1	1	0	1	0	1	0	1	16.7	16.7	16.7	7.5018	66	66	0	4.6141	By matching	By MS/MS	0	16.7	5901200	0	5901200	0	5901200	0	1	1				339	6130	TRUE	6466	13393	12587	12587
SPAC24H6.04|hxk1|I|hexokinase	SPAC24H6.04|hxk1|I|hexokinase	7	7	7	>SPAC24H6.04|hxk1|I|hexokinase 1	1	7	7	7	7	6	7	6	7	6	20	20	20	53.597	484	484	0	21.876	By MS/MS	By MS/MS	20	20	166070000	67461000	98611000	46149000	115390000	5	5	10				340	1024;1313;4285;6944;7023;7778;8802	True;True;True;True;True;True;True	1077;1383;4486;7321;7402;8192;9270	2198;2753;2754;9093;9094;15161;15162;15335;15336;16938;16939;16940;16941;19141;19142	2027;2533;2534;8384;14201;14202;14365;14366;15833;15834;15835;15836;17876	2027;2533;8384;14202;14365;15834;17876
SPAC24H6.06|sld3|I|DNA	SPAC24H6.06|sld3|I|DNA	1	1	1	>SPAC24H6.06|sld3|I|DNA replication pre-initiation complex subunit Sld3	1	1	1	1	1	1	1	1	1	1	1.1	1.1	1.1	79.814	699	699	0.0097697	1.0642	By MS/MS	By MS/MS	1.1	1.1	11827000	7905700	3921200	0	3921200	1	1	2				341	6142	TRUE	6479	13421;13422	12613;12614	12613
SPAC24H6.07|rps901|I|40S	SPAC24H6.07|rps901|I|40S	16	16	1	>SPAC24H6.07|rps901|I|40S ribosomal protein S9	1	16	16	1	16	10	16	10	1	0	50.8	50.8	4.2	22.161	191	191	0	51.681	By MS/MS	By MS/MS	50.8	33	558390000	345750000	212640000	244300000	278920000	19	12	31				342	1575;1576;2973;2974;3289;3290;4242;4382;4440;4524;5129;5542;6306;6560;6568;8108	True;True;True;True;True;True;True;True;True;True;True;True;True;True;True;True	1660;1661;3106;3107;3433;3434;4441;4591;4652;4740;5369;5812;5813;6652;6918;6926;8542	3266;3267;3268;3269;3270;6248;6249;6250;6251;6928;6929;6930;9011;9272;9273;9407;9408;9585;10759;10760;11748;11749;11750;11751;11752;11753;13763;13764;14346;14347;14360;14361;17688;17689	3021;3022;3023;3024;3025;5783;5784;5785;5786;6428;6429;6430;8309;8552;8553;8687;8688;8849;9932;9933;10881;10882;10883;10884;10885;10886;12922;12923;13463;13476;13477;16525;16526	3022;3024;5784;5786;6428;6429;8309;8552;8687;8849;9933;10881;12922;13463;13476;16525	146	91
SPAC24H6.10c|SPAC24H6.10c|I|phospho-2-dehydro-3-deoxyheptonate	SPAC24H6.10c|SPAC24H6.10c|I|phospho-2-dehydro-3-deoxyheptonate	3	3	3	>SPAC24H6.10c|SPAC24H6.10c|I|phospho-2-dehydro-3-deoxyheptonate aldolase (predicted)	1	3	3	3	3	3	3	3	3	3	13.6	13.6	13.6	39.76	368	368	0	11.924	By MS/MS	By MS/MS	13.6	13.6	57589000	30660000	26929000	28355000	27172000	3	3	6				343	1525;4822;6266	True;True;True	1607;5045;6611	3164;3165;10140;10141;13671;13672	2932;2933;9370;9371;12840;12841	2933;9371;12841
SPAC25A8.02|atg14|I|autophagy	SPAC25A8.02|atg14|I|autophagy	1	1	1	>SPAC25A8.02|atg14|I|autophagy protein Atg14	1	1	1	1	0	1	0	1	0	1	2.8	2.8	2.8	45.304	390	390	0	3.5205	By matching	By MS/MS	0	2.8	0	0	0	0	0	0	1	1				344	8418	TRUE	8874	18381	17178	17178
SPAC25B8.04c|mss51|I|mitochondrial	SPAC25B8.04c|mss51|I|mitochondrial	6	6	6	>SPAC25B8.04c|mss51|I|mitochondrial splicing suppressor Mss51 (predicted)	1	6	6	6	6	5	6	5	6	5	25.9	25.9	25.9	43.599	378	378	0	16.667	By MS/MS	By MS/MS	25.9	20.6	68258000	30404000	37854000	27234000	38980000	4	5	9				345	1841;3368;4477;6289;7179;7662	True;True;True;True;True;True	1933;3516;4691;6634;7563;8069	3750;3751;7080;7081;9482;9483;13722;15645;15646;16643;16644	3470;3471;6564;8758;8759;12883;14652;14653;15556	3470;6564;8758;12883;14653;15556
SPAC25B8.12c|SPAC25B8.12c|I|unknown	SPAC25B8.12c|SPAC25B8.12c|I|unknown	6	6	6	>SPAC25B8.12c|SPAC25B8.12c|I|unknown HAD superfamily hydrolase	1	6	6	6	5	4	5	4	5	4	31.4	31.4	31.4	33.85	303	303	0	20.433	By MS/MS	By MS/MS	24.1	22.1	101520000	57182000	44343000	38220000	59458000	4	3	7				346	1518;2646;2738;3348;5493;8289	True;True;True;True;True;True	1600;2764;2861;3496;5743;8734	3151;3152;5531;5724;5725;7044;7045;11523;18091	2921;2922;5135;5300;5301;6533;10641;16913	2922;5135;5300;6533;10641;16913
SPAC25G10.05c|his1|I|ATP	SPAC25G10.05c|his1|I|ATP	1	1	1	>SPAC25G10.05c|his1|I|ATP phosphoribosyltransferase	1	1	1	1	0	1	0	1	0	1	2.3	2.3	2.3	34.029	310	310	0.0098246	1.1112	By matching	By MS/MS	0	2.3	4680600	0	4680600	0	4680600	0	1	1				347	4778	TRUE	4999	10062	9294	9294
SPCC285.15c|rps2802|III|40S;SPAC25G10.06|rps2801|I|40S	SPCC285.15c|rps2802|III|40S;SPAC25G10.06|rps2801|I|40S	1;1	1;1	1;1	>SPCC285.15c|rps2802|III|40S ribosomal protein S28, Rps2802;>SPAC25G10.06|rps2801|I|40S ribosomal protein S28 (predicted)	2	1	1	1	1	1	1	1	1	1	23.5	23.5	23.5	7.6638	68	68;68	0	3.2686	By MS/MS	By MS/MS	23.5	23.5	9823900	4227600	5596200	0	5596200	1	1	2				348	2684	TRUE	2804	5613;5614	5202;5203	5202
SPAC25G10.07c|cut7|I|kinesin	SPAC25G10.07c|cut7|I|kinesin	1	1	1	>SPAC25G10.07c|cut7|I|kinesin family plus-end microtubule motor Cut7	1	1	1	1	0	1	0	1	0	1	1.3	1.3	1.3	122.13	1085	1085	0.0015649	1.8538	By matching	By MS/MS	0	1.3	25594000	0	25594000	0	25594000	0	1	1				349	1894	TRUE	1987	3864	3584	3584
SPAC25G10.08|SPAC25G10.08|I|translation	SPAC25G10.08|SPAC25G10.08|I|translation	18	18	18	>SPAC25G10.08|SPAC25G10.08|I|translation initiation factor eIF3b (p84)	1	18	18	18	16	13	16	13	16	13	34.6	34.6	34.6	84.034	725	725	0	65.517	By MS/MS	By MS/MS	28.6	24.3	224050000	120580000	103470000	97547000	118390000	13	9	22				350	189;340;1171;1195;1660;1820;2053;2988;3977;4430;5068;5797;7429;8105;8393;8728;9208;9340	True;True;True;True;True;True;True;True;True;True;True;True;True;True;True;True;True;True	201;356;1232;1257;1748;1912;2153;3123;4157;4642;5305;6112;7823;8539;8846;9193;9693;9830	462;755;2496;2497;2537;2538;3423;3711;4239;4240;6287;6288;8402;9390;10632;10633;12635;12636;16156;16157;17681;18333;18334;18990;18991;20055;20056;20351;20352	430;696;2303;2304;2340;3171;3433;3434;3939;5821;7765;8672;9820;11877;11878;15108;15109;16519;17135;17735;17736;17737;18816;18817;19111;19112	430;696;2304;2340;3171;3433;3939;5821;7765;8672;9820;11878;15108;16519;17135;17736;18817;19111
SPAC25H1.07|emc1|I|ER	SPAC25H1.07|emc1|I|ER	2	2	2	>SPAC25H1.07|emc1|I|ER membrane protein complex subunit Emc1 (predicted)	1	2	2	2	2	2	2	2	2	2	2.6	2.6	2.6	100.92	885	885	0	2.4025	By MS/MS	By MS/MS	2.6	2.6	16015000	9647900	6367000	8693100	6672900	1	1	2				351	2436;8475	True;True	2549;8932	5026;5027;18487;18488	4663;17272;17273	4663;17273
SPAC3A12.10|rpl2001|I|60S;SPAC26A3.04|rpl2002|I|60S	SPAC3A12.10|rpl2001|I|60S;SPAC26A3.04|rpl2002|I|60S	6;6	6;6	6;6	>SPAC3A12.10|rpl2001|I|60S ribosomal protein L20a (predicted);>SPAC26A3.04|rpl2002|I|60S ribosomal protein L20 (predicted)	2	6	6	6	6	4	6	4	6	4	38.1	38.1	38.1	20.599	176	176;176	0	13.097	By MS/MS	By MS/MS	38.1	21.6	71139000	47850000	23290000	35845000	32076000	5	3	8				352	675;4427;6348;7638;8217;8264	True;True;True;True;True;True	703;4639;6697;8044;8659;8706	1461;9384;9385;13856;13857;16583;16584;17953;17954;18040	1338;8667;8668;13010;13011;15502;15503;16784;16785;16868	1338;8668;13011;15502;16784;16868	147	109
SPAC26A3.05|chc1|I|clathrin	SPAC26A3.05|chc1|I|clathrin	45	45	45	>SPAC26A3.05|chc1|I|clathrin heavy chain Chc1 (predicted)	1	45	45	45	45	38	45	38	45	38	43.4	43.4	43.4	190.02	1666	1666	0	230.55	By MS/MS	By MS/MS	43.4	37.5	1961900000	938570000	1023300000	829780000	991200000	57	44	101				353	71;354;457;589;595;1156;1187;1631;2457;2672;3109;3179;3192;3461;3844;3876;3927;3929;4208;4219;4286;4307;4676;4771;4827;5204;5673;5912;6160;6363;6391;6514;6586;6588;6733;7142;7396;7827;7929;8385;8498;8548;8650;8673;9140	True;True;True;True;True;True;True;True;True;True;True;True;True;True;True;True;True;True;True;True;True;True;True;True;True;True;True;True;True;True;True;True;True;True;True;True;True;True;True;True;True;True;True;True;True	72;371;477;478;613;619;1217;1249;1718;2571;2791;3246;3318;3331;3614;4021;4022;4055;4106;4108;4406;4417;4487;4511;4896;4991;4992;5050;5445;5983;6232;6233;6498;6713;6744;6871;6944;6946;7103;7524;7790;8244;8354;8836;8837;8955;9010;9114;9138;9623	143;144;145;146;792;793;1024;1025;1026;1027;1275;1286;1287;2464;2465;2466;2526;3367;3368;5076;5588;6569;6570;6571;6572;6707;6708;6728;6729;7283;7284;8126;8127;8189;8190;8191;8192;8295;8298;8299;8947;8948;8967;8968;9095;9096;9147;9148;9149;9878;9879;9880;10048;10049;10050;10051;10150;10151;10152;10153;10900;10901;12344;12345;12871;12872;12873;12874;12875;13457;13458;13903;13904;13960;14246;14247;1…	125;126;730;731;945;946;947;1169;1179;2271;2272;2273;2331;3118;3119;4706;5183;6088;6089;6090;6091;6220;6221;6241;6242;6243;6743;6744;6745;7516;7517;7572;7573;7574;7575;7576;7577;7672;7674;7675;8247;8248;8266;8267;8385;8386;8437;8438;9128;9129;9130;9281;9282;9283;9284;9378;9379;9380;9381;10062;10063;11616;12094;12095;12096;12097;12645;13063;13064;13112;13377;13378;13379;13380;13502;13503;13504;135…	125;731;946;1169;1179;2272;2331;3119;4706;5183;6088;6220;6242;6745;7517;7574;7672;7675;8247;8266;8385;8438;9129;9283;9378;10062;11616;12097;12645;13064;13112;13379;13505;13510;13797;14580;15053;15948;16166;17115;17312;17407;17595;17633;18702	148;149;150;151;152	551;601;649;793;992
SPBC17G9.10|rpl1102|II|60S;SPAC26A3.07c|rpl1101|I|60S	SPBC17G9.10|rpl1102|II|60S;SPAC26A3.07c|rpl1101|I|60S	2;2	2;2	2;2	>SPBC17G9.10|rpl1102|II|60S ribosomal protein L11 (predicted);>SPAC26A3.07c|rpl1101|I|60S ribosomal protein L11 (predicted)	2	2	2	2	2	2	2	2	2	2	13.8	13.8	13.8	19.891	174	174;174	0	15.225	By MS/MS	By MS/MS	13.8	13.8	53341000	14619000	38722000	0	38722000	2	2	4				354	3631;5383	True;True	3794;5626	7645;7646;11269;11270	7070;7071;10400;10401	7071;10401
SPAC26A3.09c|rga2|I|Rho-type	SPAC26A3.09c|rga2|I|Rho-type	1	1	1	>SPAC26A3.09c|rga2|I|Rho-type GTPase activating protein Rga2	1	1	1	1	1	1	1	1	1	1	0.6	0.6	0.6	143.59	1275	1275	0.00079051	1.9606	By MS/MS	By MS/MS	0.6	0.6	47370000	33442000	13927000	0	13927000	1	1	2				355	9122	TRUE	9605	19888;19889	18667;18668	18668
SPAC26A3.10|cnt6|I|centaurin	SPAC26A3.10|cnt6|I|centaurin	10	10	10	>SPAC26A3.10|cnt6|I|centaurin ADOP ribosylation factor GTPase activating protein family (predicted)	1	10	10	10	9	5	9	5	9	5	13.9	13.9	13.9	104.5	923	923	0	27.534	By MS/MS	By MS/MS	12.7	7.6	77434000	52488000	24946000	45399000	28505000	8	5	13				356	611;3556;6833;7041;7110;7567;7997;8243;8968;9106	True;True;True;True;True;True;True;True;True;True	636;3712;7206;7420;7491;7967;8426;8685;9443;9589	1318;7495;14917;14918;15370;15371;15509;16412;17445;17446;18001;19491;19492;19861	1204;6936;13983;13984;14400;14521;15340;16300;16301;16831;18196;18197;18641	1204;6936;13983;14400;14521;15340;16301;16831;18197;18641
SPAC26A3.15c|nsp1|I|nucleoporin	SPAC26A3.15c|nsp1|I|nucleoporin	14	14	14	>SPAC26A3.15c|nsp1|I|nucleoporin Nsp1	1	14	14	14	14	11	14	11	14	11	32.8	32.8	32.8	60.73	598	598	0	89.578	By MS/MS	By MS/MS	32.8	27.3	469510000	311720000	157800000	254150000	182100000	14	9	23				357	165;700;3253;3353;4315;4502;4758;5477;6141;7634;7781;7794;8460;8938	True;True;True;True;True;True;True;True;True;True;True;True;True;True	174;729;3395;3501;4520;4717;4718;4978;5723;6478;8040;8195;8209;8917;9411	416;417;1507;6856;6857;7054;7055;9163;9538;9539;9540;10025;10026;11474;13419;13420;16576;16577;16944;16945;16991;16992;18460;18461;18462;18463;19421;19422	384;385;1380;6362;6363;6542;6543;8450;8803;8804;8805;8806;8807;9261;10597;12612;15497;15839;15893;15894;15895;17248;17249;17250;18133;18134	384;1380;6363;6542;8450;8807;9261;10597;12612;15497;15839;15894;17249;18133	153	548
SPAC26A3.16|dph1|I|UBA	SPAC26A3.16|dph1|I|UBA	1	1	1	>SPAC26A3.16|dph1|I|UBA domain protein Dph1	1	1	1	1	1	1	1	1	1	1	4.5	4.5	4.5	36.819	354	354	0	3.1217	By MS/MS	By MS/MS	4.5	4.5	8056800	2290000	5766700	0	5766700	1	1	2				358	6850	TRUE	7223	14958;14959	14021;14022	14021
SPAC26F1.03|pda1|I|pyruvate	SPAC26F1.03|pda1|I|pyruvate	5	5	5	>SPAC26F1.03|pda1|I|pyruvate dehydrogenase e1 component alpha subunit Pda1 (predicted)	1	5	5	5	5	2	5	2	5	2	21.8	21.8	21.8	45.137	409	409	0	9.9508	By MS/MS	By MS/MS	21.8	6.4	40806000	34469000	6336700	27380000	11107000	6	1	7				359	541;2398;3185;5728;6932	True;True;True;True;True	562;2511;3324;6041;7309	1179;1180;1181;4948;6716;12490;15138;15139	1081;1082;4592;6229;11745;14180;14181	1082;4592;6229;11745;14181
SPAC26F1.06|gpm1|I|monomeric	SPAC26F1.06|gpm1|I|monomeric	15	15	15	>SPAC26F1.06|gpm1|I|monomeric 2,3-bisphosphoglycerate (BPG)-dependent phosphoglycerate mutase (PGAM), Gpm1	1	15	15	15	13	15	13	15	13	15	73.9	73.9	73.9	23.765	211	211	0	95.305	By MS/MS	By MS/MS	71.1	73.9	1783800000	818370000	965480000	712470000	871280000	22	24	46				360	434;435;1528;1529;1861;2849;2940;4991;7317;7318;7521;7948;8444;8869;9353	True;True;True;True;True;True;True;True;True;True;True;True;True;True;True	452;453;454;455;1610;1611;1953;2976;3069;5225;7707;7708;7920;8374;8375;8901;9340;9843	961;962;963;964;965;966;967;968;969;970;971;972;973;3171;3172;3173;3174;3175;3176;3177;3178;3179;3785;3786;5965;6166;6167;10487;10488;15929;15930;15931;16338;16339;16340;16341;17338;17339;17340;17341;18429;18430;18431;18432;19282;19283;20373;20374;20375	886;887;888;889;890;891;892;893;894;895;896;897;898;2938;2939;2940;2941;2942;2943;2944;3501;3502;5524;5710;5711;9684;9685;14903;14904;14905;15271;15272;15273;15274;16197;16198;16199;16200;17224;17225;17226;18009;18010;19130;19131;19132	888;898;2941;2944;3502;5524;5710;9685;14904;14905;15272;16197;17224;18009;19130	154	172
SPAC26F1.07|SPAC26F1.07|I|glucose	SPAC26F1.07|SPAC26F1.07|I|glucose	3	3	3	>SPAC26F1.07|SPAC26F1.07|I|glucose 1-dehydrogenase (NADP+) (predicted)	1	3	3	3	2	3	2	3	2	3	10	10	10	36.192	321	321	0	43.521	By MS/MS	By MS/MS	7.5	10	40790000	27209000	13580000	25379000	0	3	2	5				361	2981;3671;7494	True;True;True	3116;3837;7891	6269;6270;7738;7739;16287	5802;5803;5804;7158;7159;15225	5802;7159;15225
SPAC26F1.10c|pyp1|I|tyrosine	SPAC26F1.10c|pyp1|I|tyrosine	2	2	2	>SPAC26F1.10c|pyp1|I|tyrosine phosphatase Pyp1	1	2	2	2	2	0	2	0	2	0	3.6	3.6	3.6	61.587	550	550	0	3.5019	By MS/MS	By matching	3.6	0	6727700	6727700	0	6275200	0	1	0	1				362	5620;9343	True;True	5924;9833	12063;20357	11194;19117	11194;19117
SPAC26F1.13c|lrs1|I|cytoplasmic	SPAC26F1.13c|lrs1|I|cytoplasmic	12	12	12	>SPAC26F1.13c|lrs1|I|cytoplasmic leucine-tRNA ligase Lrs1 (predicted)	1	12	12	12	11	8	11	8	11	8	14.3	14.3	14.3	126.45	1111	1111	0	39.274	By MS/MS	By MS/MS	13.7	10.2	137610000	67535000	70072000	53634000	79430000	9	9	18				363	1302;1408;1547;2693;2751;2822;5011;6841;7444;7636;8925;9253	True;True;True;True;True;True;True;True;True;True;True;True	1372;1482;1631;2813;2876;2949;5246;7214;7839;8042;9398;9741	2734;2735;2924;2925;3211;3212;5630;5631;5758;5759;5913;10531;14931;16186;16579;16580;19392;19393;19394;20157	2516;2703;2704;2973;2974;2975;5217;5218;5333;5334;5479;9727;13995;15133;15499;18109;18110;18111;18918	2516;2704;2973;5217;5333;5479;9727;13995;15133;15499;18109;18918
SPAC26F1.14c|aif1|I|apoptosis-inducing	SPAC26F1.14c|aif1|I|apoptosis-inducing	1	1	1	>SPAC26F1.14c|aif1|I|apoptosis-inducing factor homolog Aif1 (predicted)	1	1	1	1	0	1	0	1	0	1	1.8	1.8	1.8	66.565	611	611	0.00079554	2.0152	By matching	By MS/MS	0	1.8	0	0	0	0	0	0	1	1				364	8059	TRUE	8491	17579	16425	16425
SPAC26H5.07c|SPAC26H5.07c|I|seven	SPAC26H5.07c|SPAC26H5.07c|I|seven	5	5	5	>SPAC26H5.07c|SPAC26H5.07c|I|seven transmembrane receptor protein (predicted)	1	5	5	5	4	4	4	4	4	4	9.5	9.5	9.5	56.858	505	505	0	14.874	By MS/MS	By MS/MS	9.5	8.1	149670000	70122000	79546000	57550000	87401000	4	5	9				365	2898;4803;7910;9248;9264	True;True;True;True;True	3027;5024;8333;9736;9752	6083;10102;10103;17267;20144;20145;20146;20178;20179	5634;9334;9335;16134;18904;18905;18906;18937;18938	5634;9334;16134;18904;18938
SPAC26H5.09c|SPAC26H5.09c|I|oxidoreductase	SPAC26H5.09c|SPAC26H5.09c|I|oxidoreductase	9	9	9	>SPAC26H5.09c|SPAC26H5.09c|I|oxidoreductase involved in NADPH regeneration (predicted)	1	9	9	9	9	7	9	7	9	7	30.4	30.4	30.4	41.432	369	369	0	58.877	By MS/MS	By MS/MS	30.4	25.7	316350000	186500000	129850000	147160000	140450000	8	5	13				366	464;1543;2330;3874;4509;5864;6521;7512;7577	True;True;True;True;True;True;True;True;True	485;1627;2440;4053;4725;6179;6878;7910;7911;7977	1039;1040;3204;4807;4808;8185;8186;9553;9554;12774;14262;14263;16319;16320;16321;16322;16430;16431;16432;16433;16434	958;2967;4459;7569;7570;8821;8822;12006;13392;13393;15255;15256;15257;15356;15357;15358	958;2967;4459;7570;8822;12006;13393;15256;15357	155	13
SPAC26H5.10c|tif51|I|translation	SPAC26H5.10c|tif51|I|translation	4	1	1	>SPAC26H5.10c|tif51|I|translation elongation factor eIF5A (predicted)	1	4	1	1	3	2	1	0	1	0	45.9	11.5	11.5	17.152	157	157	0	3.6709	By MS/MS	By matching	34.4	19.1	17926000	17926000	0	16721000	0	2	0	2				367	4185;5036;6511;8312	False;True;False;False	4381;5273;6868;8758	8894;10575;10576;14241;18145;18146;18147	8195;9770;9771;13372;16963;16964;16965	8195;9771;13372;16963
SPAC27D7.02c|grp1|I|GRIP	SPAC27D7.02c|grp1|I|GRIP	5	5	5	>SPAC27D7.02c|grp1|I|GRIP domain protein Grp1 (predicted)	1	5	5	5	5	3	5	3	5	3	10	10	10	87.264	750	750	0	19.886	By MS/MS	By MS/MS	10	6	41192000	23171000	18021000	17487000	22147000	3	2	5				368	3424;4914;4969;5309;5679	True;True;True;True;True	3575;5139;5202;5552;5990	7198;10316;10317;10443;10444;11104;12357;12358	6665;9532;9533;9649;10244;11628	6665;9532;9649;10244;11628
SPAC27D7.14c|tpr1|I|RNA	SPAC27D7.14c|tpr1|I|RNA	10	10	10	>SPAC27D7.14c|tpr1|I|RNA polymerase II associated Paf1 complex subunit Tpr1	1	10	10	10	9	7	9	7	9	7	10.9	10.9	10.9	119.15	1039	1039	0	16.973	By MS/MS	By MS/MS	9	8.5	64629000	38993000	25636000	33603000	25783000	8	6	14				369	161;450;1652;1818;3077;5412;5640;6756;7389;8999	True;True;True;True;True;True;True;True;True;True	170;470;1740;1910;3214;5656;5950;7127;7783;9474	410;1006;1007;1008;1009;3406;3407;3707;3708;6503;11344;11345;12108;12109;14771;14772;16085;19550	379;929;930;931;3157;3430;6032;10474;10475;11232;11233;13850;13851;15043;18244	379;929;3157;3430;6032;10474;11233;13850;15043;18244
SPAC27E2.03c|SPAC27E2.03c|I|Obg-Like	SPAC27E2.03c|SPAC27E2.03c|I|Obg-Like	5	5	5	>SPAC27E2.03c|SPAC27E2.03c|I|Obg-Like ATPase (predicted)	1	5	5	5	4	5	4	5	4	5	18.6	18.6	18.6	44.332	392	392	0	11.756	By MS/MS	By MS/MS	13.5	18.6	52275000	24499000	27776000	25232000	25395000	4	4	8				370	716;2368;7387;8560;8626	True;True;True;True;True	747;2480;7781;9022;9090	1536;1537;4883;4884;16083;18659;18660;18782;18783	1407;1408;4524;4525;15041;17433;17434;17546;17547	1408;4525;15041;17433;17546
SPAC27E2.09|mak2|I|histidine	SPAC27E2.09|mak2|I|histidine	23	23	23	>SPAC27E2.09|mak2|I|histidine kinase Mak2	1	23	23	23	21	14	21	14	21	14	11.7	11.7	11.7	264.62	2310	2310	0	56.354	By MS/MS	By MS/MS	10.6	7	114230000	73498000	40737000	56231000	53060000	16	10	26				371	1412;1863;2033;2252;2866;3338;3665;4405;4546;4696;4874;4891;4906;4966;5096;5472;5987;6240;6471;6578;7582;7734;8454	True;True;True;True;True;True;True;True;True;True;True;True;True;True;True;True;True;True;True;True;True;True;True	1487;1955;2133;2360;2994;3483;3831;4614;4765;4916;5099;5116;5131;5199;5334;5718;6313;6583;6826;6936;7983;8147;8911	2933;3789;3790;4198;4199;4664;4665;6007;6008;7017;7018;7725;9309;9628;9629;9916;10244;10274;10301;10302;10440;10690;10691;11466;11467;13050;13620;13621;14157;14377;14378;16443;16444;16847;18450	2712;3504;3505;3903;3904;4333;4334;5566;5567;6508;6509;7146;8588;8890;8891;9161;9465;9493;9520;9646;9871;10591;12266;12793;12794;13301;13490;15366;15749;17240	2712;3505;3904;4333;5566;6508;7146;8588;8890;9161;9465;9493;9520;9646;9871;10591;12266;12793;13301;13490;15366;15749;17240
SPAC27E2.10c|rfc3|I|DNA	SPAC27E2.10c|rfc3|I|DNA	1	1	1	>SPAC27E2.10c|rfc3|I|DNA replication factor C complex subunit Rfc3	1	1	1	1	1	1	1	1	1	1	3.8	3.8	3.8	38.439	342	342	0	3.6243	By matching	By MS/MS	3.8	3.8	6197200	2433100	3764100	0	3764100	0	1	1				372	3340	TRUE	3486	7023;7024	6514	6514
SPAC29A4.02c|SPAC29A4.02c|I|translation	SPAC29A4.02c|SPAC29A4.02c|I|translation	18	18	18	>SPAC29A4.02c|SPAC29A4.02c|I|translation elongation factor EF-1 gamma subunit	1	18	18	18	15	15	15	15	15	15	57	57	57	45.701	409	409	0	84.24	By MS/MS	By MS/MS	51.3	51.3	1078400000	507390000	571050000	459030000	585290000	17	16	33				373	169;957;1297;1934;1988;2474;3073;4326;5289;5580;6836;8053;8183;8184;8227;8228;8480;9371	True;True;True;True;True;True;True;True;True;True;True;True;True;True;True;True;True;True	178;1006;1367;2031;2088;2588;3210;4531;5532;5868;7209;8485;8623;8624;8669;8670;8937;9861	423;424;425;426;2051;2052;2053;2054;2721;2722;2723;2724;3945;3946;4116;4117;5103;5104;6494;6495;6496;6497;9182;9183;11063;11064;11952;11953;14922;14923;17565;17887;17888;17973;17974;18497;20412;20413;20414;20415	393;394;395;1889;1890;1891;2506;2507;2508;3666;3667;3829;3830;4730;4731;6024;6025;6026;8467;10208;10209;11089;11090;13987;13988;16413;16723;16724;16804;16805;17280;19162;19163;19164;19165	393;1889;2508;3666;3829;4730;6026;8467;10209;11090;13987;16413;16723;16724;16804;16805;17280;19165	156	52
SPAC29A4.04c|cbf5|I|pseudouridylate	SPAC29A4.04c|cbf5|I|pseudouridylate	2	2	2	>SPAC29A4.04c|cbf5|I|pseudouridylate synthase Cbf5 (predicted)	1	2	2	2	2	2	2	2	2	2	4.4	4.4	4.4	53.11	474	474	0	2.5154	By MS/MS	By MS/MS	4.4	4.4	5002900	2488300	2514600	0	2514600	2	1	3				374	4942;8368	True;True	5171;8819	10389;10390;18278;18279	9599;9600;17086	9599;17086
SPAC29A4.08c|prp19|I|ubiquitin-protein	SPAC29A4.08c|prp19|I|ubiquitin-protein	2	2	2	>SPAC29A4.08c|prp19|I|ubiquitin-protein ligase E4 Prp19	1	2	2	2	2	0	2	0	2	0	3.9	3.9	3.9	54.191	488	488	0	2.6686	By MS/MS	By matching	3.9	0	3859800	3859800	0	3600200	0	2	0	2				375	1905;4621	True;True	2000;4841	3891;9773	3613;9024	3613;9024
SPAC29A4.11|rga3|I|Rho-type	SPAC29A4.11|rga3|I|Rho-type	5	5	5	>SPAC29A4.11|rga3|I|Rho-type GTPase activating protein Rga3	1	5	5	5	3	3	3	3	3	3	7.4	7.4	7.4	108.65	969	969	0	27.175	By MS/MS	By MS/MS	4.5	4.2	17509000	17001000	507790	15858000	0	3	3	6				376	818;1188;1922;5836;8497	True;True;True;True;True	855;1250;2019;6151;8954	1762;2527;3923;12712;12713;18531	1617;2332;3645;11947;11948;17310	1617;2332;3645;11947;17310
SPAC29A4.15|srs1|I|cytoplasmic	SPAC29A4.15|srs1|I|cytoplasmic	17	17	17	>SPAC29A4.15|srs1|I|cytoplasmic serine-tRNA ligase Srs1 (predicted)	1	17	17	17	15	12	15	12	15	12	43.3	43.3	43.3	51.642	450	450	0	55.636	By MS/MS	By MS/MS	36	31.8	272270000	171860000	100410000	134350000	121480000	15	11	26				377	376;903;2845;3319;3835;4081;4179;5548;5667;7003;7424;7502;7587;8854;8976;9179;9322	True;True;True;True;True;True;True;True;True;True;True;True;True;True;True;True;True	393;948;2972;3463;4010;4272;4375;5822;5823;5977;7382;7818;7899;7989;9324;9451;9663;9811	837;1955;1956;5957;5958;6984;8104;8105;8106;8107;8665;8666;8884;11770;11771;11772;12330;12331;15300;15301;16148;16298;16456;16457;19245;19504;19505;19999;20000;20309	771;1801;1802;5517;5518;6478;7498;7499;7500;7501;8005;8186;10900;10901;11603;11604;14334;14335;15100;15236;15377;15378;17977;18206;18766;18767;19059	771;1801;5518;6478;7501;8005;8186;10900;11604;14335;15100;15236;15378;17977;18206;18766;19059	157	1
SPAC29A4.16|hal4|I|serine/threonine	SPAC29A4.16|hal4|I|serine/threonine	5	5	5	>SPAC29A4.16|hal4|I|serine/threonine protein kinase Hal4	1	5	5	5	5	4	5	4	5	4	9.3	9.3	9.3	69.114	636	636	0	9.9807	By MS/MS	By MS/MS	9.3	7.5	285180000	129580000	155600000	118910000	157550000	3	5	8				378	1840;2262;2347;3807;6026	True;True;True;True;True	1932;2371;2457;3981;6353	3748;3749;4683;4684;4685;4686;4687;4838;4839;8048;13128;13129	3469;4350;4351;4352;4353;4486;4487;7447;12330	3469;4352;4486;7447;12330
SPAC29A4.18|prw1|I|Clr6	SPAC29A4.18|prw1|I|Clr6	8	8	8	>SPAC29A4.18|prw1|I|Clr6 histone deacetylase complex subunit Prw1	1	8	8	8	7	7	7	7	7	7	24.8	24.8	24.8	48.476	431	431	0	28.155	By MS/MS	By MS/MS	22.5	20.4	222100000	114450000	107650000	82168000	132230000	8	7	15				379	761;3082;3760;4592;5994;7664;7796;8536	True;True;True;True;True;True;True;True	797;3219;3932;4812;6320;8071;8211;8998	1647;6514;6515;7958;9725;9726;9727;13062;13063;16647;16648;16995;16996;18611;18612	1513;6041;6042;7366;8982;8983;8984;12277;12278;15559;15560;15897;15898;17386;17387	1513;6042;7366;8983;12277;15559;15897;17387
SPAC29A4.20|elp3|I|elongator	SPAC29A4.20|elp3|I|elongator	6	6	6	>SPAC29A4.20|elp3|I|elongator complex subunit Elp3 (predicted)	1	6	6	6	6	5	6	5	6	5	13.6	13.6	13.6	61.849	544	544	0	16.433	By MS/MS	By MS/MS	13.6	11.2	65191000	37117000	28074000	30085000	32610000	5	7	12				380	1007;1552;2159;5471;6119;8357	True;True;True;True;True;True	1058;1636;2264;5717;6454;8807	2158;2159;3222;3223;3224;3225;3226;3227;4448;4449;11464;11465;13369;18251;18252	1989;1990;2984;2985;2986;2987;2988;4125;10589;10590;12565;17062;17063	1990;2984;4125;10589;12565;17063
SPAC29B12.01|ino80|I|SNF2	SPAC29B12.01|ino80|I|SNF2	2	2	2	>SPAC29B12.01|ino80|I|SNF2 family ATP-dependent 3 to 5 DNA helicase Ino80	1	2	2	2	2	2	2	2	2	2	1.4	1.4	1.4	183.05	1604	1604	0.0015686	1.8838	By matching	By MS/MS	1.4	1.4	6796100	3226000	3570100	2962900	3616200	0	2	2				381	2116;4568	True;True	2218;4787	4359;4360;9671;9672	4046;8929	4046;8929
SPAC29B12.04|snz1|I|pyridoxine	SPAC29B12.04|snz1|I|pyridoxine	5	5	5	>SPAC29B12.04|snz1|I|pyridoxine biosynthesis protein	1	5	5	5	5	3	5	3	5	3	29.7	29.7	29.7	31.403	296	296	0	19.276	By MS/MS	By MS/MS	29.7	12.5	49930000	37643000	12287000	28899000	18499000	3	1	4				382	1464;1492;2467;3389;3511	True;True;True;True;True	1544;1573;2581;3537;3666	3052;3053;3105;3106;5091;5092;7115;7410	2828;2829;2877;2878;4720;6594;6859	2829;2878;4720;6594;6859
SPAC29B12.06c|rcd1|I|RNA-binding	SPAC29B12.06c|rcd1|I|RNA-binding	2	2	2	>SPAC29B12.06c|rcd1|I|RNA-binding protein, CCR4-NOT complex subunit Rcd1	1	2	2	2	2	1	2	1	2	1	7.4	7.4	7.4	32.211	283	283	0	3.886	By MS/MS	By MS/MS	7.4	4.2	7701500	5342700	2358800	4983400	0	1	1	2				383	5307;7983	True;True	5550;8412	11101;11102;17415	10241;10242;16272	10242;16272
SPAC29B12.07|sec16|I|multidomain	SPAC29B12.07|sec16|I|multidomain	1	1	1	>SPAC29B12.07|sec16|I|multidomain vesicle coat component Sec16 (predicted)	1	1	1	1	1	1	1	1	1	1	0.6	0.6	0.6	218.09	1995	1995	0	4.5935	By MS/MS	By MS/MS	0.6	0.6	6485800	3350100	3135700	0	3135700	1	1	2				384	8437	TRUE	8894	18416;18417	17212;17213	17212
SPAC29B12.08|clr5|I|Clr5	SPAC29B12.08|clr5|I|Clr5	2	2	2	>SPAC29B12.08|clr5|I|Clr5 protein	1	2	2	2	2	2	2	2	2	2	4.9	4.9	4.9	75.679	689	689	0	5.9863	By MS/MS	By MS/MS	4.9	4.9	31558000	10251000	21307000	0	21307000	1	2	3				385	379;6705	True;True	396;7069	842;843;14650;14651;14652	775;776;13734;13735	775;13734
SPAC29E6.06c|SPAC29E6.06c|I|cytoplasmic	SPAC29E6.06c|SPAC29E6.06c|I|cytoplasmic	4	4	4	>SPAC29E6.06c|SPAC29E6.06c|I|cytoplasmic cysteine-tRNA ligase Crs1 (predicted)	1	4	4	4	4	2	4	2	4	2	9.7	9.7	9.7	85.554	754	754	0	4.9726	By MS/MS	By MS/MS	9.7	6.8	121360000	37448000	83915000	46484000	72359000	2	1	3				386	1723;1792;6121;6414	True;True;True;True	1812;1883;6456;6767	3525;3526;3652;13371;14008;14009	3265;3381;12567;13153	3265;3381;12567;13153
SPAC29E6.08|tbp1|I|TATA-binding	SPAC29E6.08|tbp1|I|TATA-binding	1	1	1	>SPAC29E6.08|tbp1|I|TATA-binding protein (TBP)	1	1	1	1	1	1	1	1	1	1	3	3	3	25.442	231	231	0	2.312	By MS/MS	By MS/MS	3	3	7260100	3587500	3672600	0	3672600	1	1	2				387	1806	TRUE	1897	3681;3682	3404;3405	3405
SPAC2C4.07c|dis32|I|3'-5'-exoribonuclease	SPAC2C4.07c|dis32|I|3'-5'-exoribonuclease	1	1	1	>SPAC2C4.07c|dis32|I|3-5-exoribonuclease activity Dis3L2	1	1	1	1	1	0	1	0	1	0	1.4	1.4	1.4	105.15	927	927	0.0022971	1.6628	By MS/MS	By matching	1.4	0	0	0	0	0	0	1	0	1				388	4314	TRUE	4519	9162	8449	8449
SPAC2C4.10c|csc4|I|SIP/FAR	SPAC2C4.10c|csc4|I|SIP/FAR	2	2	2	>SPAC2C4.10c|csc4|I|SIP/FAR complex subunit, Csc4	1	2	2	2	2	1	2	1	2	1	15.1	15.1	15.1	19.686	166	166	0	7.7134	By MS/MS	By MS/MS	15.1	10.2	28911000	18384000	10527000	17147000	0	2	1	3				389	1532;7564	True;True	1614;7964	3184;16408;16409	2948;15336;15337	2948;15336
SPAC2C4.13|vma16|I|V-type	SPAC2C4.13|vma16|I|V-type	1	1	1	>SPAC2C4.13|vma16|I|V-type ATPase V0 subunit c (predicted)	1	1	1	1	0	1	0	1	0	1	6	6	6	20.885	199	199	0.0097971	1.082	By matching	By MS/MS	0	6	19414000	0	19414000	0	19414000	0	1	1				390	3634	TRUE	3797	7650	7075	7075
SPAC521.05|rps802|I|40S;SPAC2C4.16c|rps801|I|40S	SPAC521.05|rps802|I|40S;SPAC2C4.16c|rps801|I|40S	3;3	3;3	3;3	>SPAC521.05|rps802|I|40S ribosomal protein S8 (predicted);>SPAC2C4.16c|rps801|I|40S ribosomal protein S8 (predicted)	2	3	3	3	3	3	3	3	3	3	20.5	20.5	20.5	22.564	200	200;200	0	10.579	By MS/MS	By MS/MS	20.5	20.5	67808000	26974000	40834000	25300000	40694000	3	3	6				391	3483;5439;6665	True;True;True	3636;5685;7025	7333;7334;11403;11404;14555;14556	6789;6790;10534;10535;13644;13645	6789;10534;13644
SPAC2E1P3.04|cao1|I|copper	SPAC2E1P3.04|cao1|I|copper	36	36	35	>SPAC2E1P3.04|cao1|I|copper amine oxidase Cao1	1	36	36	35	33	31	33	31	32	30	62.2	62.2	60.5	81.24	712	712	0	249.51	By MS/MS	By MS/MS	61.9	57	3051300000	1596900000	1454500000	1353000000	1546800000	42	41	83				392	139;808;978;1001;1308;1432;1643;1760;2781;2800;2870;2917;2918;2964;2965;3201;4004;4308;4583;4934;5000;5172;5173;5276;5533;5583;5589;5596;5643;6090;6129;7080;7114;8027;8734;9121	True;True;True;True;True;True;True;True;True;True;True;True;True;True;True;True;True;True;True;True;True;True;True;True;True;True;True;True;True;True;True;True;True;True;True;True	147;845;1027;1052;1378;1508;1731;1851;2907;2927;2999;3046;3047;3096;3097;3341;4189;4512;4802;5159;5160;5235;5413;5414;5518;5800;5801;5872;5879;5890;5891;5953;6423;6465;7461;7495;8459;9199;9604	298;299;1744;1745;2099;2146;2745;2965;2966;2967;2968;3392;3393;3593;3594;3595;3596;5832;5833;5834;5835;5869;5870;6015;6016;6121;6122;6123;6124;6125;6224;6225;6226;6227;6228;6229;6745;6746;8474;8475;9150;9151;9707;9708;10355;10356;10357;10358;10507;10508;10845;10846;10847;11037;11038;11725;11726;11727;11728;11729;11730;11731;11961;11962;11978;11979;11998;11999;12000;12001;12002;12003;12280;12281;1…	264;265;1599;1935;1977;2525;2743;2744;2745;2746;3144;3330;3331;3332;3333;5400;5401;5402;5403;5435;5436;5574;5575;5576;5670;5671;5672;5673;5674;5762;5763;5764;5765;5766;5767;5768;6258;6259;7826;7827;8439;8440;8962;8963;9567;9568;9569;9570;9703;9704;10011;10012;10013;10184;10860;10861;10862;10863;10864;10865;11097;11098;11112;11132;11133;11134;11135;11136;11137;11561;11562;11563;12491;12586;14463;1…	265;1599;1935;1977;2525;2743;3144;3332;5400;5435;5576;5673;5674;5765;5767;6259;7827;8440;8963;9567;9703;10012;10013;10184;10865;11097;11112;11134;11563;12491;12586;14465;14534;16365;17746;18666	158;159;160;161;162	238;268;298;303;554
SPAC2F3.09|hem1|I|5-aminolevulinate	SPAC2F3.09|hem1|I|5-aminolevulinate	21	21	21	>SPAC2F3.09|hem1|I|5-aminolevulinate synthase Hem1	1	21	21	21	20	20	20	20	20	20	60.4	60.4	60.4	60.959	558	558	0	119.9	By MS/MS	By MS/MS	57.5	58.6	1065900000	474260000	591640000	392670000	549790000	27	29	56				393	1;1322;1797;1872;2145;2353;3051;3160;3825;4188;4289;4294;5765;6382;6428;6986;6990;8170;8215;9057;9066	True;True;True;True;True;True;True;True;True;True;True;True;True;True;True;True;True;True;True;True;True	1;1392;1888;1965;2249;2463;3187;3299;3999;4000;4384;4492;4497;6080;6734;6781;6782;7365;7369;8607;8657;9534;9543;9544	2;3;2774;2775;3661;3662;3663;3664;3809;3810;3811;3812;4417;4418;4849;4850;6420;6669;6670;8082;8083;8084;8085;8086;8897;8898;8899;9110;9111;9112;9113;9120;9121;12578;12579;12580;12581;13940;13941;14033;14034;14035;14036;15264;15265;15273;15274;17845;17846;17847;17848;17950;19750;19751;19764;19765;19766;19767	1;2;2558;3389;3390;3391;3392;3524;3525;3526;3527;4096;4097;4496;5945;6183;6184;6185;7479;7480;7481;7482;7483;7484;8198;8199;8399;8400;8401;8402;8403;8404;8411;8412;11824;11825;11826;13093;13174;13175;13176;13177;14297;14298;14299;14306;14307;14308;14309;16681;16682;16782;18537;18548;18549;18550;18551	2;2558;3390;3526;4096;4496;5945;6183;7484;8198;8402;8411;11825;13093;13176;14299;14307;16682;16782;18537;18551	163;164;165	349;463;521
SPAC2F3.10|vps54|I|GARP	SPAC2F3.10|vps54|I|GARP	4	4	4	>SPAC2F3.10|vps54|I|GARP complex subunit Vps54 (predicted)	1	4	4	4	3	2	3	2	3	2	5.9	5.9	5.9	107.95	949	949	0	10.575	By MS/MS	By MS/MS	4	3.7	15298000	6373200	8925000	5944500	0	3	2	5				394	2223;6343;7038;7290	True;True;True;True	2331;6691;7417;7680	4579;4580;13843;15365;15872	4239;4240;12995;14395;14853	4239;12995;14395;14853
SPAC2F3.16|SPAC2F3.16|I|ubiquitin-protein	SPAC2F3.16|SPAC2F3.16|I|ubiquitin-protein	1	1	1	>SPAC2F3.16|SPAC2F3.16|I|ubiquitin-protein ligase E3 (predicted)	1	1	1	1	1	1	1	1	1	1	2.4	2.4	2.4	49.904	425	425	0	2.4461	By MS/MS	By MS/MS	2.4	2.4	6500100	3286300	3213800	0	3213800	1	1	2				395	7679	TRUE	8086	16701;16702	15613;15614	15613
SPAC2F7.03c|pom1|I|DYRK	SPAC2F7.03c|pom1|I|DYRK	5	5	5	>SPAC2F7.03c|pom1|I|DYRK family protein kinase Pom1	1	5	5	5	3	4	3	4	3	4	7.5	7.5	7.5	121.14	1087	1087	0	24.36	By MS/MS	By MS/MS	4.5	6.8	42086000	15343000	26742000	19446000	21608000	2	4	6				396	360;2716;5218;5877;8775	True;True;True;True;True	377;2836;5459;6192;9242	805;5676;10932;10933;12798;19084;19085	740;5256;10093;10094;12030;17825;17826	740;5256;10093;12030;17825
SPAC2F7.05c|tif5|I|translation	SPAC2F7.05c|tif5|I|translation	1	1	1	>SPAC2F7.05c|tif5|I|translation initiation factor eIF5, Tif5(predicted)	1	1	1	1	0	1	0	1	0	1	2.5	2.5	2.5	44.944	395	395	0	2.2515	By matching	By MS/MS	0	2.5	3568700	0	3568700	0	3568700	0	0	0				397	5092	TRUE	5330	10683	9864	9864
SPAC2F7.11|nrd1|I|RNA-binding	SPAC2F7.11|nrd1|I|RNA-binding	2	2	2	>SPAC2F7.11|nrd1|I|RNA-binding protein Nrd1	1	2	2	2	2	2	2	2	2	2	4	4	4	57.76	529	529	0	3.3027	By matching	By MS/MS	4	4	10201000	6034300	4166500	5325800	4469200	0	2	2				398	1903;2455	True;True	1998;2569	3888;3889;5072;5073	3611;4704	3611;4704	166	376
SPAC2F7.13c|wrs1|I|cytoplasmic	SPAC2F7.13c|wrs1|I|cytoplasmic	6	6	6	>SPAC2F7.13c|wrs1|I|cytoplasmic tryptophan-tRNA ligase Wrs1 (predicted)	1	6	6	6	5	6	5	6	5	6	15.7	15.7	15.7	44.91	395	395	0	13.708	By MS/MS	By MS/MS	13.4	15.7	64610000	30772000	33838000	28406000	34134000	6	5	11				399	1918;2346;2873;4104;4704;4878	True;True;True;True;True;True	2015;2456;3002;4295;4924;5103	3918;3919;4836;4837;6022;6023;6024;6025;8711;9929;9930;10250;10251	3640;3641;4484;4485;5582;5583;5584;8044;9172;9173;9470;9471	3640;4484;5582;8044;9173;9470
SPAC2G11.02|urb2|I|ribosome	SPAC2G11.02|urb2|I|ribosome	2	2	2	>SPAC2G11.02|urb2|I|ribosome biogenesis protein Urb2 (predicted)	1	2	2	2	1	2	1	2	1	2	1.5	1.5	1.5	151.57	1318	1318	0	3.0705	By MS/MS	By MS/MS	0.8	1.5	18287000	2201400	16086000	0	16086000	1	1	2				400	4093;4840	True;True	4284;5064	8690;10176;10177	8025;9403;9404	8025;9403
SPAC2G11.03c|vps45|I|vacuolar	SPAC2G11.03c|vps45|I|vacuolar	1	1	1	>SPAC2G11.03c|vps45|I|vacuolar sorting protein Vps45	1	1	1	1	0	1	0	1	0	1	1.4	1.4	1.4	63.551	558	558	0.0080527	1.3786	By matching	By MS/MS	0	1.4	0	0	0	0	0	0	1	1				401	4203	TRUE	4401	8935	8236	8236
SPAC2G11.06|vps4|I|AAA	SPAC2G11.06|vps4|I|AAA	1	1	1	>SPAC2G11.06|vps4|I|AAA family ATPase Vps4 (predicted)	1	1	1	1	1	1	1	1	1	1	3.7	3.7	3.7	48.401	432	432	0.00080775	2.1211	By MS/MS	By matching	3.7	3.7	7880800	4543800	3337000	0	3337000	1	0	1				402	4124	TRUE	4316	8758;8759	8082	8082
SPAC2G11.10c|uba42|I|thiosulfate	SPAC2G11.10c|uba42|I|thiosulfate	2	2	2	>SPAC2G11.10c|uba42|I|thiosulfate sulfurtransferase, URM1 activating enzyme E1-type Uba42 (predicted)	1	2	2	2	2	0	2	0	2	0	6	6	6	44.415	401	401	0	10.931	By MS/MS	By matching	6	0	2465600	2465600	0	2299800	0	1	0	1				403	1651;5847	True;True	1739;6162	3405;12736	3156;11971	3156;11971
SPAC30.01c|sec72|I|Sec7	SPAC30.01c|sec72|I|Sec7	13	13	13	>SPAC30.01c|sec72|I|Sec7 domain protein, ARF GEF Sec72	1	13	13	13	11	11	11	11	11	11	8.1	8.1	8.1	206.8	1822	1822	0	37.178	By MS/MS	By MS/MS	7	6.3	115840000	60192000	55644000	52463000	59325000	9	6	15				404	278;1776;3126;3777;4291;4593;5974;6355;7098;7791;7961;8036;8612	True;True;True;True;True;True;True;True;True;True;True;True;True	292;1867;3263;3950;4494;4813;6299;6704;7479;8206;8389;8468;9076	638;639;3622;3623;6603;7990;7991;9115;9116;9728;13024;13025;13869;13870;15485;15486;16985;16986;17370;17530;17531;18755	587;588;3354;6120;7400;8406;8407;8985;12243;13021;14504;14505;15886;15887;16229;16379;16380;17521	588;3354;6120;7400;8406;8985;12243;13021;14504;15886;16229;16380;17521
SPAC30.04c|abc4|I|glutathione	SPAC30.04c|abc4|I|glutathione	5	5	5	>SPAC30.04c|abc4|I|glutathione S-conjugate-exporting ATPase Abc4	1	5	5	5	4	3	4	3	4	3	3.7	3.7	3.7	164.79	1469	1469	0	9.998	By MS/MS	By MS/MS	2.9	2.4	40933000	13904000	27028000	18887000	21111000	3	2	5				405	1107;1250;2807;7260;7323	True;True;True;True;True	1161;1317;2934;7648;7713	2356;2357;2636;5881;15811;15812;15939	2172;2173;2428;5446;14801;14912	2172;2428;5446;14801;14912
SPAC30C2.04|asc1|I|cofactor	SPAC30C2.04|asc1|I|cofactor	3	3	3	>SPAC30C2.04|asc1|I|cofactor for cytoplasmic methionyl-and glutamyl-tRNA synthetases Asc1 (predicted)	1	3	3	3	3	2	3	2	3	2	6.2	6.2	6.2	50.606	450	450	0	5.8943	By MS/MS	By MS/MS	6.2	4	31859000	22923000	8936500	19901000	10417000	2	2	4				406	593;1439;4282	True;True;True	617;1518;4483	1282;1283;2987;2988;9088	1175;1176;2765;8381	1176;2765;8381
SPAC30C2.05|erv14|I|cornichon	SPAC30C2.05|erv14|I|cornichon	1	1	1	>SPAC30C2.05|erv14|I|cornichon family protein Erv14 (predicted)	1	1	1	1	1	1	1	1	1	1	8	8	8	15.99	137	137	0	3.3294	By MS/MS	By matching	8	8	8409000	3678200	4730800	3457100	4704500	2	0	2				407	7646	TRUE	8052	16599;16600;16601;16602	15515;15516	15515
SPAC30C2.08|SPAC30C2.08|I|conserved	SPAC30C2.08|SPAC30C2.08|I|conserved	4	4	4	>SPAC30C2.08|SPAC30C2.08|I|conserved fungal protein	1	4	4	4	3	3	3	3	3	3	9.6	9.6	9.6	52.69	457	457	0	7.7899	By MS/MS	By MS/MS	8.1	7.9	53477000	29032000	24445000	25488000	26036000	2	4	6				408	3037;3782;4292;6276	True;True;True;True	3173;3956;4495;6621	6392;8002;8003;9117;13695;13696	5919;7409;7410;8408;12860;12861;12862	5919;7409;8408;12862
SPAC30D11.09|cwf19|I|complexed	SPAC30D11.09|cwf19|I|complexed	1	1	1	>SPAC30D11.09|cwf19|I|complexed with Cdc5 protein Cwf19	1	1	1	1	1	0	1	0	1	0	1.6	1.6	1.6	74.419	639	639	0	4.6918	By MS/MS	By matching	1.6	0	0	0	0	0	0	1	0	1				409	3589	TRUE	3747	7561	6994	6994
SPAC30D11.11|SPAC30D11.11|I|Haemolysin-III	SPAC30D11.11|SPAC30D11.11|I|Haemolysin-III	1	1	1	>SPAC30D11.11|SPAC30D11.11|I|Haemolysin-III family protein (predicted)	1	1	1	1	1	0	1	0	1	0	1.6	1.6	1.6	51.056	442	442	0.0015456	1.7365	By MS/MS	By matching	1.6	0	1823800	1823800	0	1701100	0	1	0	1				410	4357	TRUE	4564	9232	8517	8517
SPAC30D11.12|rpl3802|I|60S	SPAC30D11.12|rpl3802|I|60S	1	1	1	>SPAC30D11.12|rpl3802|I|60S ribosomal protein L38 (predicted)	1	1	1	1	1	1	1	1	1	1	18.9	18.9	18.9	8.3388	74	74	0	2.8759	By MS/MS	By MS/MS	18.9	18.9	10868000	5012900	5855200	0	5855200	1	1	2				411	6427	TRUE	6780	14031;14032	13172;13173	13173
SPAC30D11.14c|SPAC30D11.14c|I|RNA-binding	SPAC30D11.14c|SPAC30D11.14c|I|RNA-binding	1	1	1	>SPAC30D11.14c|SPAC30D11.14c|I|RNA-binding protein (predicted)	1	1	1	1	1	0	1	0	1	0	2.8	2.8	2.8	59.035	534	534	0	3.1811	By MS/MS	By matching	2.8	0	2232700	2232700	0	2082500	0	1	0	1				412	1131	TRUE	1188	2407	2215	2215
SPAC31A2.04c|pre1|I|20S	SPAC31A2.04c|pre1|I|20S	1	1	1	>SPAC31A2.04c|pre1|I|20S proteasome complex subunit beta 4 Pre1 (predicted)	1	1	1	1	1	1	1	1	1	1	7.7	7.7	7.7	21.967	194	194	0	3.3388	By matching	By MS/MS	7.7	7.7	13585000	7155100	6429500	0	6429500	0	1	1				413	3057	TRUE	3194	6456;6457	5988	5988
SPAC31A2.09c|apm4|I|AP-2	SPAC31A2.09c|apm4|I|AP-2	3	3	3	>SPAC31A2.09c|apm4|I|AP-2 adaptor complex subunit Apm4 (predicted)	1	3	3	3	3	1	3	1	3	1	6.5	6.5	6.5	50.821	446	446	0	6.1505	By MS/MS	By matching	6.5	2	8880400	7639700	1240700	7125900	0	3	0	3				414	3688;3886;6885	True;True;True	3854;4065;7260	7767;7768;8212;15034	7185;7597;14086	7185;7597;14086
SPAC31A2.14|bun107|I|WD	SPAC31A2.14|bun107|I|WD	3	3	3	>SPAC31A2.14|bun107|I|WD repeat protein, human WDR48 family Bun107	1	3	3	3	2	2	2	2	2	2	3.6	3.6	3.6	107.28	962	962	0	6.2012	By MS/MS	By MS/MS	2	2.7	17027000	8880400	8146800	0	8146800	0	2	2				415	4823;6422;8252	True;True;True	5046;6775;8694	10142;10143;14023;18017	9372;9373;13165;16844	9372;13165;16844
SPAC31G5.04|lys12|I|homoisocitrate	SPAC31G5.04|lys12|I|homoisocitrate	12	12	12	>SPAC31G5.04|lys12|I|homoisocitrate dehydrogenase Lys12	1	12	12	12	8	11	8	11	8	11	37.8	37.8	37.8	39.256	362	362	0	38.828	By MS/MS	By MS/MS	24.6	33.1	223130000	89801000	133330000	95203000	121890000	9	12	21				416	2498;2556;3872;3873;4114;4718;4726;5526;6550;6874;7139;8090	True;True;True;True;True;True;True;True;True;True;True;True	2613;2672;4051;4052;4305;4938;4946;5789;6907;7248;7521;8523	5168;5343;5344;8182;8183;8184;8735;8736;8737;8738;9954;9969;11700;11701;11702;14326;14327;15006;15007;15008;15009;15568;17647;17648	4791;4969;4970;7566;7567;7568;8065;8066;8067;9194;9209;10839;10840;13447;13448;14062;14063;14064;14065;14574;16489;16490	4791;4970;7566;7568;8066;9194;9209;10839;13447;14064;14574;16489
SPAC31G5.05c|SPAC31G5.05c|I|ribulose	SPAC31G5.05c|SPAC31G5.05c|I|ribulose	2	2	2	>SPAC31G5.05c|SPAC31G5.05c|I|ribulose phosphate 3-epimerase (predicted)	1	2	2	2	2	2	2	2	2	2	11.8	11.8	11.8	25.205	228	228	0	4.2912	By MS/MS	By MS/MS	11.8	11.8	14885000	6200500	8684000	0	8684000	1	1	2				417	3216;7872	True;True	3356;8292	6774;6775;17190;17191	6285;6286;16062	6285;16062
SPAC31G5.09c|spk1|I|MAP	SPAC31G5.09c|spk1|I|MAP	7	7	7	>SPAC31G5.09c|spk1|I|MAP kinase Spk1	1	7	7	7	6	5	6	5	6	5	21	21	21	42.003	372	372	0	19.623	By MS/MS	By MS/MS	18.3	16.7	127060000	69956000	57101000	60743000	55422000	8	5	13				418	513;556;1093;3802;4903;7201;8065	True;True;True;True;True;True;True	534;578;579;1146;3976;5128;7588;8497	1132;1212;1213;1214;1215;2325;2326;8041;10293;10294;10295;10296;15694;15695;17592	1039;1114;1115;1116;2147;2148;7442;9512;9513;9514;9515;14697;14698;16438	1039;1115;2147;7442;9513;14697;16438	167	213
SPAC31G5.13|rpn11|I|19S	SPAC31G5.13|rpn11|I|19S	6	6	6	>SPAC31G5.13|rpn11|I|19S proteasome regulatory subunit Rpn11	1	6	6	6	5	4	5	4	5	4	25.3	25.3	25.3	34.572	308	308	0	16.843	By MS/MS	By MS/MS	23.1	18.2	82156000	45729000	36427000	45222000	33858000	4	3	7				419	713;6454;7068;7562;8616;8766	True;True;True;True;True;True	744;6809;7449;7962;9080;9233	1530;1531;14082;14083;14084;15426;16405;16406;18762;19066	1401;1402;13217;13218;13219;14446;15334;17526;17809	1402;13219;14446;15334;17526;17809
SPAC31G5.14|gcv1|I|glycine	SPAC31G5.14|gcv1|I|glycine	4	4	4	>SPAC31G5.14|gcv1|I|glycine decarboxylase T subunit (predicted)	1	4	4	4	4	4	4	4	4	4	13.7	13.7	13.7	42.408	387	387	0	12.278	By MS/MS	By MS/MS	13.7	13.7	90433000	42110000	48323000	35886000	51714000	3	5	8				420	426;2399;4672;7861	True;True;True;True	444;2512;4892;8281	944;945;946;947;4949;4950;9871;9872;17168;17169;17170;17171	869;870;871;4593;9121;9122;16044;16045;16046	869;4593;9122;16045
SPAC31G5.16c|dpm1|I|dolichol-phosphate	SPAC31G5.16c|dpm1|I|dolichol-phosphate	1	1	1	>SPAC31G5.16c|dpm1|I|dolichol-phosphate mannosyltransferase catalytic subunit Dpm1	1	1	1	1	1	1	1	1	1	1	4.7	4.7	4.7	26.672	236	236	0.00080972	2.1404	By matching	By MS/MS	4.7	4.7	7869400	3473300	4396100	0	4396100	0	1	1				421	9288	TRUE	9777	20242;20243	19000	19000
SPAC31G5.17c|rps1001|I|40S	SPAC31G5.17c|rps1001|I|40S	4	4	2	>SPAC31G5.17c|rps1001|I|40S ribosomal protein S10 (predicted)	1	4	4	2	4	3	4	3	2	1	39.6	39.6	20.1	16.275	144	144	0	17.147	By MS/MS	By MS/MS	39.6	29.9	269300000	134500000	134800000	123370000	136880000	5	4	9				422	310;927;1790;3070	True;True;True;True	324;974;1881;3207	692;693;1995;3647;3648;3649;3650;6486;6487;6488;6489	638;1837;3376;3377;3378;3379;6017;6018;6019	638;1837;3377;6019
SPAC323.04|SPAC323.04|I|mitochondrial	SPAC323.04|SPAC323.04|I|mitochondrial	10	10	10	>SPAC323.04|SPAC323.04|I|mitochondrial ATPase (predicted)	1	10	10	10	8	9	8	9	8	9	25.1	25.1	25.1	54.841	487	487	0	38.211	By MS/MS	By MS/MS	19.1	23.4	102520000	54388000	48136000	45138000	53727000	3	10	13				423	1830;3663;4131;5402;5425;6081;7963;8484;8908;9324	True;True;True;True;True;True;True;True;True;True	1922;3829;4324;5646;5671;6413;8391;8941;9380;9814	3726;3727;7721;7722;8776;8777;11321;11377;11378;13276;17375;17376;18502;18503;19361;20314;20315;20316	3447;3448;7143;7144;8098;10452;10509;10510;12471;16235;17285;17286;18079;19066;19067	3447;7143;8098;10452;10510;12471;16235;17285;18079;19067
SPAC323.07c|SPAC323.07c|I|MatE	SPAC323.07c|SPAC323.07c|I|MatE	2	2	2	>SPAC323.07c|SPAC323.07c|I|MatE family transmembrane transporter (predicted)	1	2	2	2	2	1	2	1	2	1	4.7	4.7	4.7	58.597	533	533	0	9.9394	By MS/MS	By MS/MS	4.7	1.5	5148200	5148200	0	4801900	0	2	1	3				424	2910;8233	True;True	3039;8675	6109;6110;17981	5659;5660;16810	5660;16810
SPAC328.03|tps1|I|alpha,alpha-trehalose-phosphate	SPAC328.03|tps1|I|alpha,alpha-trehalose-phosphate	18	18	18	>SPAC328.03|tps1|I|alpha,alpha-trehalose-phosphate synthase [UDP-forming]	1	18	18	18	16	16	16	16	16	16	40.4	40.4	40.4	58.493	513	513	0	84.082	By MS/MS	By MS/MS	34.9	36.6	673490000	336670000	336820000	312090000	336700000	12	19	31				425	36;775;1554;1961;1969;2930;3710;4705;4706;5089;5690;5871;6205;8383;8384;8779;8780;9308	True;True;True;True;True;True;True;True;True;True;True;True;True;True;True;True;True;True	36;812;1638;2060;2068;3059;3877;4925;4926;5327;6001;6186;6548;8834;8835;9246;9247;9797	75;76;1669;1670;3229;3230;4011;4012;4013;4014;4029;4030;6144;6145;7816;7817;9931;9932;9933;10679;12379;12788;12789;13552;18305;18306;18307;18308;18309;18310;19090;19091;19092;19093;19094;20278;20279;20280;20281	65;66;1534;1535;2990;3725;3726;3727;3743;3744;5692;7230;9174;9175;9176;9861;11647;12020;12021;12729;17108;17109;17110;17111;17112;17830;17831;17832;17833;19033;19034;19035;19036	65;1535;2990;3725;3744;5692;7230;9174;9176;9861;11647;12020;12729;17110;17111;17831;17833;19036
SPAC328.06|ubp2|I|ubiquitin	SPAC328.06|ubp2|I|ubiquitin	17	17	17	>SPAC328.06|ubp2|I|ubiquitin C-terminal hydrolase Ubp2	1	17	17	17	14	14	14	14	14	14	20.9	20.9	20.9	130.3	1141	1141	0	51.09	By MS/MS	By MS/MS	18.8	15.3	261980000	132240000	129740000	118820000	134270000	15	13	28				426	338;468;478;1219;3328;4055;4457;4677;4998;5644;5691;6994;7141;7282;7648;8819;8820	True;True;True;True;True;True;True;True;True;True;True;True;True;True;True;True;True	354;489;499;1282;3473;4242;4669;4897;5232;5954;6002;7373;7523;7672;8054;9287;9288	751;752;1047;1048;1069;2581;2582;7001;7002;8604;8605;9439;9440;9881;9882;10502;12284;12285;12380;12381;12382;12383;15281;15571;15861;15862;16604;19170;19171;19172	692;693;963;964;981;2376;2377;6494;6495;7947;7948;8717;8718;9131;9698;11564;11648;11649;11650;11651;14316;14577;14841;14842;15518;17903;17904;17905	692;963;981;2376;6494;7947;8717;9131;9698;11564;11649;14316;14577;14842;15518;17903;17905
SPAC328.10c|rps502|I|40S;SPAC8C9.08|rps5|I|40S	SPAC328.10c|rps502|I|40S;SPAC8C9.08|rps5|I|40S	9;8	9;8	9;8	>SPAC328.10c|rps502|I|40S ribosomal protein S5 (predicted);>SPAC8C9.08|rps5|I|40S ribosomal protein S5 (predicted)	2	9	9	9	8	7	8	7	8	7	53.7	53.7	53.7	22.357	203	203;203	0	40.089	By MS/MS	By MS/MS	53.7	47.8	253560000	141540000	112020000	119920000	124120000	10	7	17				427	1038;1770;2126;2871;6190;6603;6626;6957;8550	True;True;True;True;True;True;True;True;True	1091;1861;2229;3000;6532;6961;6984;7335;9012	2217;2218;3611;3612;4381;4382;6017;6018;6019;13529;14430;14473;14474;15194;15195;15196;15197;18637;18638	2044;2045;3346;3347;4062;4063;5577;5578;5579;12707;13540;13577;14232;14233;14234;17411;17412	2044;3346;4063;5578;12707;13540;13577;14234;17412
SPAC32A11.04c|tif212|I|translation	SPAC32A11.04c|tif212|I|translation	2	2	2	>SPAC32A11.04c|tif212|I|translation initiation factor eIF2 beta subunit (predicted)	1	2	2	2	1	1	1	1	1	1	6.5	6.5	6.5	35.96	321	321	0	2.7199	By MS/MS	By MS/MS	3.7	2.8	9019800	2267700	6752100	2115200	0	0	1	1				428	7671;9144	True;True	8078;9627	16665;19934	15576;18709	15576;18709
SPAC343.04c|gid7|I|GID	SPAC343.04c|gid7|I|GID	5	5	5	>SPAC343.04c|gid7|I|GID complex subunit Gid7 (predicted)	1	5	5	5	3	5	3	5	3	5	13.2	13.2	13.2	58.403	507	507	0	15.344	By MS/MS	By MS/MS	6.7	13.2	51316000	15343000	35973000	19348000	30936000	3	6	9				429	1282;4360;4626;6559;7381	True;True;True;True;True	1351;4567;4846;6917;7775	2697;9238;9782;9783;14342;14343;14344;14345;16071;16072	2485;8523;9033;9034;13460;13461;13462;15031;15032	2485;8523;9034;13460;15031
SPAC343.05|vma1|I|V-type	SPAC343.05|vma1|I|V-type	13	13	13	>SPAC343.05|vma1|I|V-type ATPase V1 domain, subunit A	1	13	13	13	12	10	12	10	12	10	29.1	29.1	29.1	68.805	619	619	0	35.661	By MS/MS	By MS/MS	27.1	24.2	192840000	90488000	102360000	92024000	94734000	12	9	21				430	47;1460;1892;3099;3377;4014;4232;4776;7203;7967;7999;8277;8571	True;True;True;True;True;True;True;True;True;True;True;True;True	47;1540;1985;3236;3525;4199;4431;4997;7590;8395;8428;8721;9033	100;101;3044;3045;3861;3862;6548;6549;7095;7096;7097;8496;8497;8994;8995;10059;15698;17381;17382;17449;17450;18064;18676	88;2820;2821;3582;6071;6072;6575;6576;6577;7847;8294;8295;9291;14701;14702;16239;16240;16304;16305;16887;17447	88;2821;3582;6071;6575;7847;8294;9291;14701;16240;16304;16887;17447
SPAC343.10|met11|I|methylenetetrahydrofolate	SPAC343.10|met11|I|methylenetetrahydrofolate	1	1	1	>SPAC343.10|met11|I|methylenetetrahydrofolate reductase Met11	1	1	1	1	1	0	1	0	1	0	1.2	1.2	1.2	72.139	641	641	0.0080409	1.3713	By MS/MS	By matching	1.2	0	2553500	2553500	0	2381700	0	1	0	1				431	1029	TRUE	1082	2203	2032	2032
SPAC343.14c|tif222|I|translation	SPAC343.14c|tif222|I|translation	1	1	1	>SPAC343.14c|tif222|I|translation initiation factor eIF2B beta subunit	1	1	1	1	1	1	1	1	1	1	3.1	3.1	3.1	43.221	393	393	0	3.3586	By MS/MS	By matching	3.1	3.1	12337000	6394500	5942700	0	5942700	1	0	1				432	8940	TRUE	9413	19431;19432	18144	18144
SPAC343.16|lys2|I|homoaconitate	SPAC343.16|lys2|I|homoaconitate	2	2	2	>SPAC343.16|lys2|I|homoaconitate hydratase Lys2	1	2	2	2	2	2	2	2	2	2	3.6	3.6	3.6	78.024	721	721	0	4.7462	By MS/MS	By MS/MS	3.6	3.6	9746200	4774200	4972000	0	4972000	1	1	2				433	3382;5170	True;True	3530;5411	7104;7105;10842;10843	6583;6584;10008;10009	6584;10009
SPAC3A11.05c|kms1|I|meiotic	SPAC3A11.05c|kms1|I|meiotic	5	5	5	>SPAC3A11.05c|kms1|I|meiotic spindle pole body protein Kms1	1	5	5	5	2	5	2	5	2	5	7.7	7.7	7.7	69.24	607	607	0	14.718	By MS/MS	By MS/MS	3.5	7.7	25091000	5911000	19180000	7503500	17190000	2	5	7				434	1511;3021;3722;7844;8893	True;True;True;True;True	1593;3156;3890;8264;9365	3142;6354;6355;7845;17136;17137;19337	2912;5885;5886;7255;16018;16019;18057	2912;5885;7255;16018;18057
SPAC3A11.07|nde2|I|mitochondrial	SPAC3A11.07|nde2|I|mitochondrial	17	17	17	>SPAC3A11.07|nde2|I|mitochondrial NADH dehydrogenase (ubiquinone) Nde2 (predicted)	1	17	17	17	17	16	17	16	17	16	35.2	35.2	35.2	61.674	551	551	0	62.745	By MS/MS	By MS/MS	35.2	32.7	572570000	288310000	284260000	241310000	286940000	19	20	39				435	1285;2172;2173;2321;2972;3543;4170;4553;5138;6103;6208;6970;7419;7667;7831;8684;9274	True;True;True;True;True;True;True;True;True;True;True;True;True;True;True;True;True	1354;2280;2281;2431;3104;3105;3698;4366;4772;5378;6437;6551;7349;7813;8074;8248;9149;9763	2701;2702;2703;2704;4478;4479;4480;4481;4482;4483;4484;4485;4791;6244;6245;6246;6247;7467;7468;8863;8864;9642;9643;9644;10776;10777;10778;10779;13320;13321;13557;13558;15230;15231;16139;16140;16657;16658;16659;16660;17067;17068;18899;18900;20197;20198	2488;2489;2490;4152;4153;4154;4155;4156;4157;4445;5779;5780;5781;5782;6911;8171;8172;8903;8904;8905;9946;9947;9948;9949;12515;12516;12734;12735;14264;14265;15092;15093;15569;15570;15571;15572;15958;15959;17657;17658;18956	2490;4152;4154;4445;5781;6911;8172;8904;9949;12516;12734;14264;15092;15569;15958;17658;18956	168	455
SPAC3A11.10c|dpe1|I|dipeptidyl	SPAC3A11.10c|dpe1|I|dipeptidyl	10	10	10	>SPAC3A11.10c|dpe1|I|dipeptidyl peptidase (predicted)	1	10	10	10	9	10	9	10	9	10	34.2	34.2	34.2	46.047	409	409	0	48.58	By MS/MS	By MS/MS	29.1	34.2	333690000	171000000	162690000	152800000	156170000	9	9	18				436	256;2569;2613;2980;6248;7613;7614;7949;8899;8998	True;True;True;True;True;True;True;True;True;True	269;2685;2730;3114;3115;6592;8018;8019;8376;9371;9473	590;591;5368;5369;5463;5464;6266;6267;6268;13639;13640;16535;16536;16537;16538;16539;17342;17343;19345;19346;19549	546;547;4993;4994;5073;5074;5075;5799;5800;5801;12811;12812;15459;15460;15461;15462;15463;16201;16202;18064;18065;18243	547;4994;5074;5799;12812;15461;15463;16202;18064;18243	169	348
SPAC3A11.12c|rpt5|I|19S	SPAC3A11.12c|rpt5|I|19S	5	5	5	>SPAC3A11.12c|rpt5|I|19S proteasome regulatory subunit Rpt5 (predicted)	1	5	5	5	4	3	4	3	4	3	17.8	17.8	17.8	48.835	438	438	0	18.592	By MS/MS	By MS/MS	16.2	13.5	54177000	27340000	26838000	23785000	28553000	3	2	5				437	1210;6444;7805;8179;8319	True;True;True;True;True	1273;6798;8220;8618;8765	2564;2565;14063;14064;17013;17876;18162	2363;13202;15913;16711;16979	2363;13202;15913;16711;16979
SPAC3A12.12|atp11|I|mitochondrial	SPAC3A12.12|atp11|I|mitochondrial	1	1	1	>SPAC3A12.12|atp11|I|mitochondrial F1-ATPase chaperone Atp11 (predicted)	1	1	1	1	1	0	1	0	1	0	3.1	3.1	3.1	32.855	286	286	0.00080064	2.0611	By MS/MS	By matching	3.1	0	2674500	2674500	0	2494600	0	1	0	1				438	4272	TRUE	4472	9068	8364	8364
SPAC3A12.14|cam1|I|calmodulin	SPAC3A12.14|cam1|I|calmodulin	1	1	1	>SPAC3A12.14|cam1|I|calmodulin Cam1	1	1	1	1	1	0	1	0	1	0	7.3	7.3	7.3	16.905	150	150	0	6.1	By MS/MS	By matching	7.3	0	0	0	0	0	0	1	0	1				439	5878	TRUE	6193	12799	12031	12031
SPAC3A12.18|zwf1|I|glucose-6-phosphate	SPAC3A12.18|zwf1|I|glucose-6-phosphate	7	7	7	>SPAC3A12.18|zwf1|I|glucose-6-phosphate 1-dehydrogenase (predicted)	1	7	7	7	6	5	6	5	6	5	19.2	19.2	19.2	57.204	500	500	0	19.031	By MS/MS	By MS/MS	16.8	15.2	95425000	53530000	41896000	42480000	49345000	6	3	9				440	904;1043;1614;1852;2470;5370;8619	True;True;True;True;True;True;True	949;1096;1700;1944;2584;5613;9083	1957;2228;2229;3338;3339;3770;5096;5097;11241;11242;18765	1803;2056;3090;3091;3488;4724;10374;10375;10376;17529	1803;2056;3090;3488;4724;10376;17529	170	257
SPAC3C7.08c|elf1|I|AAA	SPAC3C7.08c|elf1|I|AAA	22	22	22	>SPAC3C7.08c|elf1|I|AAA family ATPase Elf1	1	22	22	22	21	18	21	18	21	18	28.7	28.7	28.7	116.7	1057	1057	0	95.687	By MS/MS	By MS/MS	26.9	25.2	466900000	223590000	243310000	191510000	255720000	17	20	37				441	81;252;305;372;456;882;1291;1483;1530;1673;2301;3218;3921;4673;5394;6817;7464;7868;7936;8060;8306;8447	True;True;True;True;True;True;True;True;True;True;True;True;True;True;True;True;True;True;True;True;True;True	82;265;319;389;476;922;1360;1564;1612;1761;2410;3358;4100;4893;5637;7190;7859;8288;8362;8492;8752;8904	160;161;581;582;683;684;824;825;826;827;1022;1023;1898;1899;2712;2713;3089;3090;3180;3181;3442;4749;6778;6779;8284;8285;9873;11299;11300;11301;11302;11303;14889;16215;16216;17183;17184;17317;17580;17581;17582;17583;18129;18130;18131;18132;18133;18134;18437;18438	138;139;538;539;630;631;758;759;760;761;943;944;1750;1751;2497;2498;2862;2945;3187;4410;6289;6290;7662;7663;9123;10432;10433;10434;10435;13958;15159;15160;16056;16057;16179;16426;16427;16428;16429;16950;16951;16952;16953;17230	138;538;631;760;943;1750;2497;2862;2945;3187;4410;6290;7662;9123;10432;13958;15160;16056;16179;16427;16950;17230	171	872
SPAC3C7.11c|cnx1|I|calnexin	SPAC3C7.11c|cnx1|I|calnexin	5	5	5	>SPAC3C7.11c|cnx1|I|calnexin Cnx1	1	5	5	5	4	4	4	4	4	4	13.4	13.4	13.4	63.465	560	560	0	14.815	By MS/MS	By MS/MS	9.8	10.4	116500000	59284000	57211000	43676000	68832000	4	4	8				442	569;2031;2202;2686;4732	True;True;True;True;True	592;2131;2310;2806;4952	1235;1236;4194;4195;4538;4539;5616;9979	1134;1135;3900;3901;4202;4203;5205;9218	1134;3900;4202;5205;9218	172	148
SPAC3C7.12|tip1|I|CLIP170	SPAC3C7.12|tip1|I|CLIP170	3	3	3	>SPAC3C7.12|tip1|I|CLIP170 family protein Tip1	1	3	3	3	3	2	3	2	3	2	14.8	14.8	14.8	52.607	461	461	0.0066225	1.411	By MS/MS	By MS/MS	14.8	6.7	32143000	18789000	13354000	14631000	16248000	1	2	3				443	3753;5088;6384	True;True;True	3925;5326;6736	7946;7947;10677;10678;13944	7356;9860;13096	7356;9860;13096
SPAC3C7.14c|obr1|I|ubiquitinated	SPAC3C7.14c|obr1|I|ubiquitinated	1	1	1	>SPAC3C7.14c|obr1|I|ubiquitinated protein Uhp1	1	1	1	1	1	0	1	0	1	0	5.4	5.4	5.4	21.898	202	202	0	2.5027	By MS/MS	By matching	5.4	0	2969900	2969900	0	2770100	0	1	0	1				444	6079	TRUE	6410	13271	12466	12466
SPAC3F10.03|grs1|I|mitochondrial	SPAC3F10.03|grs1|I|mitochondrial	11	11	11	>SPAC3F10.03|grs1|I|mitochondrial and cytoplasmic glycine-tRNA ligase Grs1	1	11	11	11	9	6	9	6	9	6	18.1	18.1	18.1	74.004	652	652	0	27.457	By MS/MS	By MS/MS	15.2	9.5	145890000	86727000	59161000	68708000	71346000	8	6	14				445	80;439;2791;3773;5631;5925;6697;7236;7531;8057;8565	True;True;True;True;True;True;True;True;True;True;True	81;459;2917;3946;5940;6246;7061;7623;7930;8489;9027	158;159;980;981;5850;5851;7983;7984;12091;12900;14636;15764;16357;17576;17577;18666	136;137;904;905;5417;5418;7392;7393;11219;12123;13723;14757;15288;16423;17439	137;905;5418;7392;11219;12123;13723;14757;15288;16423;17439
SPAC3F10.04|gsa1|I|glutathione	SPAC3F10.04|gsa1|I|glutathione	1	1	1	>SPAC3F10.04|gsa1|I|glutathione synthetase large and small subunit Gsa1	1	1	1	1	0	1	0	1	0	1	3	3	3	56.152	498	498	0	2.5388	By matching	By MS/MS	0	3	3842800	0	3842800	0	3842800	0	1	1				446	4236	TRUE	4435	9002	8301	8301
SPAC3F10.11c|abc2|I|glutathione	SPAC3F10.11c|abc2|I|glutathione	3	3	3	>SPAC3F10.11c|abc2|I|glutathione S-conjugate-exporting ATPase Abc2	1	3	3	3	2	3	2	3	2	3	2.5	2.5	2.5	166.94	1478	1478	0	7.3674	By MS/MS	By MS/MS	1.9	2.5	15825000	6750900	9074600	7685200	7686100	3	2	5				447	643;6719;7332	True;True;True	668;7083;7723	1381;14677;14678;15958;15959	1261;13759;13760;13761;14926	1261;13761;14926
SPAC3F10.13|ucp6|I|UBA	SPAC3F10.13|ucp6|I|UBA	5	5	5	>SPAC3F10.13|ucp6|I|UBA domain protein Ucp6	1	5	5	5	4	5	4	5	4	5	10.3	10.3	10.3	68.72	612	612	0	16.724	By MS/MS	By MS/MS	7.7	10.3	40736000	19370000	21366000	20261000	19172000	3	5	8				448	156;3798;5924;6084;7761	True;True;True;True;True	165;3972;6245;6416;8174	399;400;401;8034;8035;12898;12899;13281;16902;16903	369;370;371;7436;7437;12121;12122;12476;15801	369;7436;12121;12476;15801
SPAC3G6.09c|tps2|I|trehalose-phosphate	SPAC3G6.09c|tps2|I|trehalose-phosphate	1	1	1	>SPAC3G6.09c|tps2|I|trehalose-phosphate synthase Tps2 (predicted)	1	1	1	1	1	0	1	0	1	0	1.1	1.1	1.1	96.34	849	849	0.0098522	1.1428	By MS/MS	By matching	1.1	0	2138500	2138500	0	1994700	0	0	0	0				449	937	TRUE	985	2015	1856	1856
SPCC1322.11|rpl2302|III|60S;SPAC3G9.03|rpl2301|I|60S	SPCC1322.11|rpl2302|III|60S;SPAC3G9.03|rpl2301|I|60S	2;2	2;2	2;2	>SPCC1322.11|rpl2302|III|60S ribosomal protein L23;>SPAC3G9.03|rpl2301|I|60S ribosomal protein L23	2	2	2	2	2	1	2	1	2	1	20.1	20.1	20.1	14.882	139	139;139	0	6.0863	By MS/MS	By MS/MS	20.1	9.4	34216000	20824000	13392000	19423000	0	1	1	2				450	5029;5892	True;True	5266;6208	10565;12823;12824	9761;12052;12053	9761;12052
SPAC3G9.05|spa2|I|cell	SPAC3G9.05|spa2|I|cell	8	8	8	>SPAC3G9.05|spa2|I|cell polarity protein Spa2	1	8	8	8	5	6	5	6	5	6	20.5	20.5	20.5	73.872	659	659	0	17.232	By MS/MS	By MS/MS	10	17.5	91646000	24379000	67267000	46881000	43125000	6	4	10				451	996;2077;3007;3501;5065;5189;8308;9171	True;True;True;True;True;True;True;True	1047;2178;3142;3655;5302;5430;8754;9655	2138;2139;4289;6330;7371;10628;10875;10876;18139;19984;19985	1969;1970;3986;5860;5861;6821;9817;10041;16958;18753;18754	1970;3986;5861;6821;9817;10041;16958;18753
SPAC3G9.06|frs2|I|cytoplasmic	SPAC3G9.06|frs2|I|cytoplasmic	11	11	11	>SPAC3G9.06|frs2|I|cytoplasmic phenylalanine-tRNA ligase alpha subunit Frs2 (predicted)	1	11	11	11	11	5	11	5	11	5	26.3	26.3	26.3	56.266	499	499	0	28.363	By MS/MS	By MS/MS	26.3	13	121690000	87730000	33957000	59696000	50310000	11	6	17				452	560;561;895;2016;3629;4385;4547;7657;8485;8541;8562	True;True;True;True;True;True;True;True;True;True;True	583;584;939;2116;3791;3792;4594;4766;8063;8942;9003;9024	1220;1221;1934;4167;4168;7639;7640;7641;7642;9276;9277;9630;16630;16631;16632;16633;18504;18619;18620;18621;18663	1120;1121;1781;3874;3875;7065;7066;7067;8556;8557;8892;15544;15545;17287;17393;17394;17395;17436	1120;1121;1781;3874;7065;8556;8892;15545;17287;17393;17436	173	170
SPAC3G9.09c|tif211|I|translation	SPAC3G9.09c|tif211|I|translation	8	8	8	>SPAC3G9.09c|tif211|I|translation initiation factor eIF2 alpha subunit	1	8	8	8	8	2	8	2	8	2	36.3	36.3	36.3	34.525	306	306	0	25.98	By MS/MS	By MS/MS	36.3	9.8	110250000	75328000	34921000	66005000	39177000	11	3	14				453	5;763;3063;4045;4257;5328;5701;6876	True;True;True;True;True;True;True;True	5;799;800;3200;4232;4457;5571;6014;7250	12;1650;1651;6472;8581;8582;9034;9035;11144;12435;15011;15012;15013	10;1516;1517;6005;7926;7927;8329;8330;10282;11698;14067;14068;14069;14070	10;1517;6005;7926;8329;10282;11698;14067	174;175	126;284
SPAC3G9.11c|pdc201|I|pyruvate;SPAC13A11.06|pdc202|I|pyruvate	SPAC3G9.11c|pdc201|I|pyruvate	8;1	8;1	8;1	>SPAC3G9.11c|pdc201|I|pyruvate decarboxylase (predicted)	2	8	8	8	7	7	7	7	7	7	22.3	22.3	22.3	62.652	570	570;571	0	30.286	By MS/MS	By MS/MS	18.2	18.1	120730000	56690000	64040000	58316000	58601000	6	7	13				454	131;3690;4611;4632;5739;6938;7930;8499	True;True;True;True;True;True;True;True	139;3856;4831;4852;6052;7315;8355;8956	280;281;282;7771;7772;9759;9760;9793;12509;12510;15149;15150;17303;18534;18535	248;249;250;7189;7190;9013;9045;11761;11762;14192;14193;16167;17313;17314	248;7189;9013;9045;11761;14192;16167;17313
SPAC3G9.12|peg1|I|CLASP	SPAC3G9.12|peg1|I|CLASP	1	1	1	>SPAC3G9.12|peg1|I|CLASP family microtubule-associated protein	1	1	1	1	0	1	0	1	0	1	0.7	0.7	0.7	164.09	1462	1462	0.0052006	1.4725	By matching	By MS/MS	0	0.7	992180	0	992180	0	992180	0	1	1				455	5889	TRUE	6205	12818	12048	12048
SPAC3G9.17|new8|I|holo-[acyl-carrier-protein]	SPAC3G9.17|new8|I|holo-[acyl-carrier-protein]	1	1	1	>SPAC3G9.17|new8|I|holo-[acyl-carrier-protein] synthase (predicted)	1	1	1	1	1	1	1	1	1	1	6.1	6.1	6.1	15.271	132	132	0.0051813	1.4442	By MS/MS	By MS/MS	6.1	6.1	15717000	4474200	11243000	0	11243000	1	1	2				456	2577	TRUE	2693	5385;5386	5007;5008	5007
SPAC3H1.05|ste24|I|CAAX	SPAC3H1.05|ste24|I|CAAX	9	9	9	>SPAC3H1.05|ste24|I|CAAX prenyl protease (predicted)	1	9	9	9	9	8	9	8	9	8	20.7	20.7	20.7	54.001	474	474	0	18.469	By MS/MS	By MS/MS	20.7	14.8	120280000	65217000	55065000	53511000	62384000	7	6	13				457	2548;3367;3414;3862;4952;4953;5482;7310;9004	True;True;True;True;True;True;True;True;True	2664;3515;3562;4041;5184;5185;5728;7700;9479	5327;5328;7078;7079;7166;8162;8163;10414;10415;10416;10417;11484;11485;15913;15914;19565;19566	4953;4954;6562;6563;6636;7549;7550;9624;9625;9626;10606;14891;18257;18258	4953;6562;6636;7549;9624;9625;10606;14891;18257
SPAC3H1.07|aru1|I|arginase;SPBP26C9.02c|car1|II|arginase	SPAC3H1.07|aru1|I|arginase;SPBP26C9.02c|car1|II|arginase	4;2	4;2	4;2	>SPAC3H1.07|aru1|I|arginase Aru1;>SPBP26C9.02c|car1|II|arginase Car1	2	4	4	4	4	4	4	4	4	4	13	13	13	35.703	323	323;323	0	7.9512	By MS/MS	By MS/MS	13	13	31763000	12440000	19323000	11422000	19504000	2	3	5				458	228;4237;5764;8572	True;True;True;True	240;4436;6079;9034	535;536;9003;9004;12576;12577;18677;18678	498;8302;8303;11823;17448	498;8302;11823;17448
SPAC3H1.09c|avt3|I|vacuolar	SPAC3H1.09c|avt3|I|vacuolar	2	2	2	>SPAC3H1.09c|avt3|I|vacuolar amino acid transmembrane transporter Avt3	1	2	2	2	2	1	2	1	2	1	5	5	5	73.06	656	656	0	6.6566	By MS/MS	By MS/MS	5	3.2	36409000	18771000	17638000	0	17638000	2	1	3				459	1251;6831	True;True	1318;7204	2637;2638;14915	2429;2430;13981	2429;13981
SPAC3H1.10|pcs2|I|phytochelatin	SPAC3H1.10|pcs2|I|phytochelatin	1	1	1	>SPAC3H1.10|pcs2|I|phytochelatin synthetase	1	1	1	1	1	1	1	1	1	1	1.9	1.9	1.9	46.741	414	414	0.0015564	1.8028	By MS/MS	By MS/MS	1.9	1.9	2153800	2153800	0	2008900	0	1	1	2				460	3549	TRUE	3704	7481;7482	6923;6924	6924
SPBC18H10.13|rps1402|II|40S;SPAC3H5.05c|rps1401|I|40S	SPBC18H10.13|rps1402|II|40S;SPAC3H5.05c|rps1401|I|40S	4;4	4;4	4;4	>SPBC18H10.13|rps1402|II|40S ribosomal protein S14 (predicted);>SPAC3H5.05c|rps1401|I|40S ribosomal protein S14 (predicted)	2	4	4	4	4	2	4	2	4	2	24.5	24.5	24.5	14.699	139	139;139	0	9.6295	By MS/MS	By MS/MS	24.5	8.6	58170000	39778000	18393000	20214000	35281000	3	4	7				461	696;834;1749;3292	True;True;True;True	725;871;1840;3436	1502;1786;1787;3573;3574;3575;6932	1376;1637;1638;3312;3313;3314;6432	1376;1637;3313;6432
SPAC3H5.07|rpl702|I|60S	SPAC3H5.07|rpl702|I|60S	3	3	3	>SPAC3H5.07|rpl702|I|60S ribosomal protein L7	1	3	3	3	3	2	3	2	3	2	14.8	14.8	14.8	28.449	250	250	0	2.3721	By MS/MS	By MS/MS	14.8	7.6	18108000	8809600	9298500	0	9298500	2	1	3				462	1613;5235;6166	True;True;True	1699;5477;6504	3337;10965;10966;13468;13469	3089;10123;12653;12654	3089;10123;12654
SPAC3H5.08c|SPAC3H5.08c|I|WD	SPAC3H5.08c|SPAC3H5.08c|I|WD	2	2	2	>SPAC3H5.08c|SPAC3H5.08c|I|WD repeat protein, human WDR44 family	1	2	2	2	2	1	2	1	2	1	2.3	2.3	2.3	103.69	933	933	0	4.0624	By MS/MS	By MS/MS	2.3	1.2	10767000	6920300	3846500	0	3846500	2	1	3				463	583;3908	True;True	606;4087	1263;8254;8255	1159;7634;7635	1159;7635
SPBC16C6.11|rpl3201|II|60S;SPAC3H5.10|rpl3202|I|60S	SPBC16C6.11|rpl3201|II|60S;SPAC3H5.10|rpl3202|I|60S	1;1	1;1	1;1	>SPBC16C6.11|rpl3201|II|60S ribosomal protein L32;>SPAC3H5.10|rpl3202|I|60S ribosomal protein L32 (predicted)	2	1	1	1	1	1	1	1	1	1	10.2	10.2	10.2	14.445	127	127;127	0	3.3753	By MS/MS	By MS/MS	10.2	10.2	43111000	22452000	20659000	0	13798000	2	2	4				464	6080	TRUE	6411;6412	13272;13273;13274;13275	12467;12468;12469;12470	12470	176	84
SPBC11C11.09c|rpl502|II|60S;SPAC3H5.12c|rpl501|I|60S	SPBC11C11.09c|rpl502|II|60S;SPAC3H5.12c|rpl501|I|60S	4;4	4;4	4;4	>SPBC11C11.09c|rpl502|II|60S ribosomal protein L5;>SPAC3H5.12c|rpl501|I|60S ribosomal protein L5 (predicted)	2	4	4	4	4	3	4	3	4	3	24.1	24.1	24.1	33.485	294	294;294	0	21.663	By MS/MS	By MS/MS	24.1	18	82467000	31404000	51062000	27218000	53136000	3	2	5				465	2366;7280;8282;8873	True;True;True;True	2477;7670;8726;9344	4877;4878;15858;15859;18072;18073;19291	4518;4519;14839;16895;16896;18017	4518;14839;16895;18017
SPAC3H8.02|csr102|I|sec14	SPAC3H8.02|csr102|I|sec14	1	1	1	>SPAC3H8.02|csr102|I|sec14 cytosolic factor family, glycerophospholipid-transfer protein Crs102 (predicted)	1	1	1	1	1	1	1	1	1	1	2	2	2	51.473	444	444	0	2.4187	By MS/MS	By matching	2	2	10256000	5297400	4959100	0	4959100	1	0	1				466	4452	TRUE	4664	9427;9428	8706	8706
SPAC3H8.05c|mms1|I|E3	SPAC3H8.05c|mms1|I|E3	1	1	1	>SPAC3H8.05c|mms1|I|E3 ubiquitin ligase complex subunit Mms1 (predicted)	1	1	1	1	1	0	1	0	1	0	0.8	0.8	0.8	120.6	1073	1073	0	2.2894	By MS/MS	By matching	0.8	0	1826600	1826600	0	1703800	0	1	0	1				467	6839	TRUE	7212	14928	13992	13992
SPAC3H8.07c|pac10|I|prefoldin	SPAC3H8.07c|pac10|I|prefoldin	1	1	1	>SPAC3H8.07c|pac10|I|prefoldin subunit 3 Pac10 (predicted)	1	1	1	1	1	1	1	1	1	1	5.3	5.3	5.3	19.445	169	169	0	2.9332	By MS/MS	By matching	5.3	5.3	7695000	4770700	2924300	0	2924300	1	0	1				468	8836	TRUE	9306	19208;19209	17943	17943
SPAC3H8.10|spo20|I|sec14	SPAC3H8.10|spo20|I|sec14	2	2	2	>SPAC3H8.10|spo20|I|sec14 cytosolic factor family, glycerophospholipid-transfer protein Spo20/Sec14	1	2	2	2	2	0	2	0	2	0	8	8	8	32.746	286	286	0	4.6457	By MS/MS	By matching	8	0	7635000	7635000	0	7121500	0	2	0	2				469	2775;4328	True;True	2901;4533	5820;9186	5388;8470	5388;8470
SPAC458.02c|SPAC458.02c|I|mRNP	SPAC458.02c|SPAC458.02c|I|mRNP	9	9	9	>SPAC458.02c|SPAC458.02c|I|mRNP complex (predicted)	1	9	9	9	7	4	7	4	7	4	24.6	24.6	24.6	53.735	468	468	0	23.245	By MS/MS	By MS/MS	20.3	13.7	68860000	34453000	34407000	29353000	37190000	5	4	9				470	120;1393;4070;4140;4996;5692;7127;7208;8232	True;True;True;True;True;True;True;True;True	128;1467;4260;4333;5230;6003;7509;7595;8674	262;2894;2895;8643;8795;10499;12384;15546;15707;17979;17980	233;2670;2671;7983;8112;9695;11652;14555;14710;16809	233;2671;7983;8112;9695;11652;14555;14710;16809
SPAC458.03|tel2|I|Tel2/Rad-5/Clk-2	SPAC458.03|tel2|I|Tel2/Rad-5/Clk-2	4	4	4	>SPAC458.03|tel2|I|Tel2/Rad-5/Clk-2 family protein Tel2	1	4	4	4	4	3	4	3	4	3	6.2	6.2	6.2	99.049	868	868	0	7.813	By MS/MS	By MS/MS	6.2	4.8	36993000	23084000	13909000	21372000	14068000	4	2	6				471	172;3811;4474;4975	True;True;True;True	181;3985;4688;5208	430;8054;8055;9477;9478;10453;10454	399;7453;7454;8752;8753;8754;9655;9656	399;7454;8754;9656
SPAC4A8.05c|myp2|I|myosin	SPAC4A8.05c|myp2|I|myosin	4	4	4	>SPAC4A8.05c|myp2|I|myosin II heavy chain Myo3	1	4	4	4	4	1	4	1	4	1	1.8	1.8	1.8	242.57	2104	2104	0	5.679	By MS/MS	By MS/MS	1.8	0.5	65934000	42383000	23551000	24790000	0	4	1	5				472	910;3968;4433;7005	True;True;True;True	956;4147;4645;7384	1967;8381;8382;8383;8384;9395;15304	1812;7746;7747;7748;8676;14338	1812;7746;8676;14338
SPAC4A8.06c|SPAC4A8.06c|I|esterase/lipase	SPAC4A8.06c|SPAC4A8.06c|I|esterase/lipase	2	2	2	>SPAC4A8.06c|SPAC4A8.06c|I|esterase/lipase (predicted)	1	2	2	2	2	2	2	2	2	2	3.5	3.5	3.5	66.109	578	578	0	2.4662	By MS/MS	By MS/MS	3.5	3.5	11970000	7143200	4826900	5807000	5682700	2	2	4				473	2019;5137	True;True	2119;5377	4172;4173;10774;10775	3879;3880;9944;9945	3879;9944
SPAC4A8.07c|lcb4|I|sphingoid	SPAC4A8.07c|lcb4|I|sphingoid	2	2	2	>SPAC4A8.07c|lcb4|I|sphingoid long chain base kinase (predicted)	1	2	2	2	1	2	1	2	1	2	6.3	6.3	6.3	51.288	458	458	0	2.7402	By MS/MS	By MS/MS	3.5	6.3	9785500	2953900	6831600	0	6831600	1	1	2				474	4557;7635	True;True	4776;8041	9648;9649;16578	8909;15498	8909;15498
SPAC4A8.11c|fas2|I|fatty	SPAC4A8.11c|fas2|I|fatty	51	51	51	>SPAC4A8.11c|fas2|I|fatty acid synthase alpha subunit Fas2	1	51	51	51	47	39	47	39	47	39	41.8	41.8	41.8	202.17	1842	1842	0	235.18	By MS/MS	By MS/MS	38.5	32	1085700000	591370000	494300000	532850000	500070000	48	38	86				475	402;707;785;1025;1317;1396;1507;1571;1718;2264;2265;2338;2356;2581;2628;2634;2641;2712;2748;3453;3622;3657;3848;4076;4173;4253;4412;4533;4724;5515;5590;5681;6070;7083;7193;7358;7380;7399;7566;7749;7857;7873;8592;8617;8618;8890;8987;9008;9079;9130;9297	True;True;True;True;True;True;True;True;True;True;True;True;True;True;True;True;True;True;True;True;True;True;True;True;True;True;True;True;True;True;True;True;True;True;True;True;True;True;True;True;True;True;True;True;True;True;True;True;True;True;True	420;738;822;1078;1387;1470;1589;1656;1807;2373;2374;2448;2466;2697;2745;2752;2759;2832;2871;2872;3605;3784;3823;4026;4266;4369;4453;4621;4750;4944;5775;5776;5880;5881;5992;6401;7464;7577;7751;7774;7793;7966;8162;8277;8293;9055;9081;9082;9362;9462;9483;9558;9613;9786	893;894;895;896;1519;1520;1690;1691;2199;2765;2766;2906;2907;3129;3260;3261;3515;3516;4690;4691;4692;4693;4818;4819;4855;4856;5392;5393;5493;5494;5508;5520;5521;5669;5670;5748;5749;5750;7260;7261;7628;7629;7707;7708;8133;8134;8655;8656;8870;8871;8872;8873;9029;9317;9602;9603;9964;9965;9966;9967;11673;11674;11675;11676;11677;11980;11981;11982;12360;12361;13247;15449;15450;15671;15672;16017;16069;1…	820;821;822;1392;1553;2028;2549;2550;2684;2685;2686;2899;3016;3017;3256;3257;4356;4357;4358;4359;4467;4468;4469;4499;5013;5102;5114;5124;5125;5251;5324;5325;6722;6723;7054;7055;7129;7130;7522;7523;7996;8177;8178;8324;8598;8866;8867;9202;9203;9204;9205;9206;9207;10813;10814;10815;10816;10817;11113;11114;11115;11630;12437;14470;14471;14674;14981;15029;15030;15058;15059;15339;15772;16036;16037;16063…	821;1392;1553;2028;2549;2684;2899;3016;3256;4356;4359;4469;4499;5013;5102;5114;5124;5251;5325;6722;7055;7129;7522;7996;8177;8324;8598;8866;9204;10815;11115;11630;12437;14470;14674;14981;15029;15059;15339;15772;16036;16063;17483;17527;17528;18051;18227;18265;18575;18686;19015	177;178;179;180;181;182	1;57;271;412;836;1246
SPAC4A8.12c|sds22|I|protein	SPAC4A8.12c|sds22|I|protein	3	3	3	>SPAC4A8.12c|sds22|I|protein phosphatase regulatory subunit Sds22	1	3	3	3	2	2	2	2	2	2	9.9	9.9	9.9	38.066	332	332	0	11.639	By MS/MS	By MS/MS	5.7	7.2	13756000	9045300	4710600	8436900	0	2	1	3				476	4051;5210;6274	True;True;True	4238;5451;6619	8594;10913;10914;13692	7938;10075;10076;12857	7938;10076;12857
SPAC4A8.13c|pts1|I|20S	SPAC4A8.13c|pts1|I|20S	2	2	2	>SPAC4A8.13c|pts1|I|20S proteasome complex subunit beta 5	1	2	2	2	2	1	2	1	2	1	7.7	7.7	7.7	29.986	272	272	0	4.7677	By MS/MS	By MS/MS	7.7	3.7	8503300	3563800	4939500	0	4939500	1	0	1				477	1151;3593	True;True	1212;3751	2455;7567;7568	2263;7000	2263;7000
SPAC4A8.15c|cdc3|I|profilin	SPAC4A8.15c|cdc3|I|profilin	2	2	2	>SPAC4A8.15c|cdc3|I|profilin	1	2	2	2	1	2	1	2	1	2	22.8	22.8	22.8	13.411	127	127	0	3.0437	By MS/MS	By MS/MS	11	22.8	16409000	3450400	12958000	0	12958000	1	2	3				478	3809;7430	True;True	3983;7824	8050;8051;16158	7449;7450;15110	7449;15110
SPAC4A8.16c|tif33|I|translation	SPAC4A8.16c|tif33|I|translation	7	7	7	>SPAC4A8.16c|tif33|I|translation initiation factor eIF3c	1	7	7	7	6	7	6	7	6	7	11	11	11	104.37	918	918	0	25.923	By MS/MS	By MS/MS	9.5	11	150200000	75192000	75006000	60651000	73853000	7	7	14				479	515;2546;5240;7062;8199;8401;8850	True;True;True;True;True;True;True	536;2662;5482;7442;7443;8639;8855;9320	1135;5323;5324;10974;10975;15415;15416;15417;15418;17911;17912;18353;18354;19237;19238	1042;4949;4950;10130;10131;14437;14438;14439;16745;16746;17153;17968;17969;17970	1042;4949;10131;14438;16745;17153;17970	183	468
SPAC4D7.01c|sec71|I|Sec7	SPAC4D7.01c|sec71|I|Sec7	1	1	1	>SPAC4D7.01c|sec71|I|Sec7 domain protein, ARF GEF (predicted)	1	1	1	1	1	1	1	1	1	1	0.4	0.4	0.4	206.93	1811	1811	0.0015492	1.7728	By MS/MS	By MS/MS	0.4	0.4	6265800	2840300	3425500	0	3425500	1	1	2				480	866	TRUE	906	1868;1869	1719;1720	1719
SPAC4D7.02c|pgc1|I|phosphatidylglycerol	SPAC4D7.02c|pgc1|I|phosphatidylglycerol	2	2	2	>SPAC4D7.02c|pgc1|I|phosphatidylglycerol phospholipase C Pgc1 (predicted)	1	2	2	2	2	1	2	1	2	1	10.6	10.6	10.6	35.585	311	311	0	3.0556	By MS/MS	By MS/MS	10.6	6.8	13912000	6662300	7250000	6214200	0	1	1	2				481	1065;7693	True;True	1118;8102	2273;16733;16734	2096;15641	2096;15641
SPAC4D7.05|sum1|I|translation	SPAC4D7.05|sum1|I|translation	15	15	15	>SPAC4D7.05|sum1|I|translation initiation factor eIF3i	1	15	15	15	14	11	14	11	14	11	53.7	53.7	53.7	36.811	328	328	0	58.809	By MS/MS	By MS/MS	48.5	40.5	456250000	257910000	198340000	244460000	182830000	12	10	22				482	706;1057;2325;2476;3516;4559;5531;5591;6379;6467;8044;8193;8311;8860;9015	True;True;True;True;True;True;True;True;True;True;True;True;True;True;True	737;1110;2435;2590;3671;4778;5797;5798;5882;6731;6822;8476;8633;8757;9330;9491	1517;1518;2255;4796;4797;4798;4799;5106;5107;7420;9652;9653;11720;11721;11722;11983;13936;13937;14148;14149;17547;17548;17900;18143;18144;19258;19259;19593	1391;2079;4449;4450;4451;4452;4733;4734;6868;8912;8913;10855;10856;10857;11116;13090;13294;16394;16735;16961;16962;17987;17988;18284	1391;2079;4452;4734;6868;8912;10857;11116;13090;13294;16394;16735;16961;17988;18284	184;185	1;116
SPAC4D7.08c|ade4|I|amidophosphoribosyltransferase	SPAC4D7.08c|ade4|I|amidophosphoribosyltransferase	14	14	14	>SPAC4D7.08c|ade4|I|amidophosphoribosyltransferase Ade4	1	14	14	14	9	14	9	14	9	14	34.5	34.5	34.5	59.831	533	533	0	65.088	By MS/MS	By MS/MS	21.4	34.5	153480000	54022000	99459000	67770000	73130000	5	15	20				483	1036;1166;1352;1793;2719;3143;3251;5022;6061;6374;7132;7551;7583;7908	True;True;True;True;True;True;True;True;True;True;True;True;True;True	1089;1227;1424;1884;2839;2840;3281;3393;5258;6389;6725;6726;7514;7951;7984;7985;8331	2213;2214;2483;2484;2837;2838;3653;3654;5680;5681;6635;6853;6854;10552;13201;13202;13926;13927;13928;15554;16389;16390;16445;16446;16447;17264	2040;2041;2291;2292;2618;3382;3383;5259;5260;6150;6151;6360;9749;12398;13081;13082;14562;15320;15367;15368;15369;16131	2041;2292;2618;3382;5260;6151;6360;9749;12398;13081;14562;15320;15369;16131	186;187;188	54;71;353
SPAC4D7.09|tif223|I|translation	SPAC4D7.09|tif223|I|translation	4	4	4	>SPAC4D7.09|tif223|I|translation initiation factor eIF2B gamma subunit	1	4	4	4	4	4	4	4	4	4	10.5	10.5	10.5	50.461	458	458	0	12.193	By MS/MS	By MS/MS	10.5	10.5	51478000	26206000	25272000	23670000	26046000	3	4	7				484	2385;3157;4369;8716	True;True;True;True	2498;3296;4577;9181	4916;4917;6664;6665;9251;9252;18969;18970	4556;4557;6178;6179;8535;8536;17716;17717	4556;6178;8535;17717
SPAC4D7.10c|spt20|I|SAGA	SPAC4D7.10c|spt20|I|SAGA	9	9	9	>SPAC4D7.10c|spt20|I|SAGA complex subunit Spt20	1	9	9	9	9	5	9	5	9	5	20.5	20.5	20.5	54.028	473	473	0	23.905	By MS/MS	By MS/MS	20.5	11.6	123340000	90500000	32836000	72422000	44827000	5	2	7				485	604;1378;1586;2320;3926;5844;6256;6321;6942	True;True;True;True;True;True;True;True;True	628;1451;1671;2430;4105;6159;6601;6668;7319	1303;1304;2871;2872;3282;4790;8291;8292;8293;8294;12729;13652;13801;13802;15157;15158	1192;2651;3037;4444;7669;7670;7671;11964;12822;12959;14199	1192;2651;3037;4444;7669;11964;12822;12959;14199
SPAC4F10.02|aap1|I|aspartyl	SPAC4F10.02|aap1|I|aspartyl	2	2	2	>SPAC4F10.02|aap1|I|aspartyl metalloaminopeptidase Aap1	1	2	2	2	2	2	2	2	2	2	5.8	5.8	5.8	51.74	467	467	0	4.7264	By MS/MS	By matching	5.8	5.8	22093000	9516600	12576000	0	12576000	1	0	1				486	4514;8367	True;True	4730;8818	9563;9564;18276;18277	8830;17085	8830;17085
SPAC4F10.09c|noc1|I|ribosome	SPAC4F10.09c|noc1|I|ribosome	4	4	4	>SPAC4F10.09c|noc1|I|ribosome biogenesis protein Noc1 (predicted)	1	4	4	4	2	4	2	4	2	4	6	6	6	97.992	860	860	0	15.546	By MS/MS	By MS/MS	3.3	6	30075000	9515600	20559000	12173000	17262000	1	4	5				487	3741;4125;7102;8369	True;True;True;True	3910;4317;7483;8820	7892;7893;8760;15495;18280;18281	7298;7299;8083;14511;17087;17088	7299;8083;14511;17088
SPAC4F10.10c|mnn9|I|mannosyltransferase	SPAC4F10.10c|mnn9|I|mannosyltransferase	6	6	6	>SPAC4F10.10c|mnn9|I|mannosyltransferase complex subunit, Anp family Mnn9 (predicted)	1	6	6	6	6	6	6	6	6	6	24	24	24	38.296	337	337	0	19.158	By MS/MS	By MS/MS	24	24	135290000	58849000	76445000	54505000	76831000	4	5	9				488	955;2334;4518;5814;5851;5857	True;True;True;True;True;True	1004;2444;4734;6129;6166;6172	2047;2048;4813;4814;9571;9572;12662;12663;12747;12748;12760;12761	1885;1886;4463;8837;8838;11901;11902;11982;11993;11994	1885;4463;8837;11902;11982;11994
SPAC4F10.11|spn1|I|mitotic	SPAC4F10.11|spn1|I|mitotic	1	1	1	>SPAC4F10.11|spn1|I|mitotic septin Spn1	1	1	1	1	1	1	1	1	1	1	1.9	1.9	1.9	53.737	469	469	0.0066176	1.4048	By MS/MS	By MS/MS	1.9	1.9	10546000	4274000	6271600	0	6271600	1	0	1				489	8534	TRUE	8995	18605;18606	17380;17381	17381
SPAC4F10.14c|btf3|I|nascent	SPAC4F10.14c|btf3|I|nascent	2	2	2	>SPAC4F10.14c|btf3|I|nascent polypeptide-associated complex beta subunit	1	2	2	2	2	2	2	2	2	2	26.5	26.5	26.5	16.202	151	151	0	13.925	By MS/MS	By MS/MS	26.5	26.5	41020000	22068000	18953000	20584000	0	3	2	5				490	581;7785	True;True	604;8199	1260;1261;16952;16953	1156;1157;15846;15847;15848	1157;15846
SPAC4F10.20|grx1|I|glutaredoxin	SPAC4F10.20|grx1|I|glutaredoxin	2	2	2	>SPAC4F10.20|grx1|I|glutaredoxin Grx1	1	2	2	2	2	2	2	2	2	2	20.8	20.8	20.8	11.261	101	101	0	4.8269	By MS/MS	By MS/MS	20.8	20.8	26285000	12041000	14244000	11308000	14167000	2	2	4				491	3993;8010	True;True	4176;8442	8449;8450;17476;17477	7808;7809;16331;16332	7808;16332
SPAC4F8.07c|hxk2|I|hexokinase	SPAC4F8.07c|hxk2|I|hexokinase	22	22	22	>SPAC4F8.07c|hxk2|I|hexokinase 2	1	22	22	22	22	20	22	20	22	20	49.7	49.7	49.7	50.92	455	455	0	103.42	By MS/MS	By MS/MS	49.7	45.3	1056000000	560700000	495260000	429750000	497730000	23	21	44				492	407;932;979;1333;2179;2598;2599;3286;4078;4134;4685;5507;5592;5697;6068;6620;6709;6734;8153;8275;8276;9027	True;True;True;True;True;True;True;True;True;True;True;True;True;True;True;True;True;True;True;True;True;True	425;980;1028;1404;2287;2715;2716;3430;4268;4327;4905;5762;5883;5884;6010;6399;6978;7073;7104;8588;8589;8718;8719;8720;9504	906;907;2005;2006;2100;2101;2797;4495;4496;4497;4498;5431;5432;5433;5434;6921;6922;6923;6924;8658;8659;8660;8782;8783;9897;9898;11631;11984;11985;11986;11987;12428;12429;13243;13244;14460;14461;14656;14657;14717;14718;17815;17816;17817;17818;18058;18059;18060;18061;18062;18063;19618;19619	835;1846;1847;1936;1937;2580;4167;4168;4169;4170;5044;5045;5046;5047;6422;6423;6424;7998;7999;8000;8101;8102;9144;9145;10768;11117;11118;11119;11120;11692;11693;12433;12434;13566;13739;13740;13800;16654;16655;16656;16657;16882;16883;16884;16885;16886;18307	835;1847;1936;2580;4168;5045;5046;6422;8000;8102;9145;10768;11117;11692;12434;13566;13740;13800;16657;16885;16886;18307	189;190;191;192	89;289;374;411
SPAC4F8.13c|rng2|I|IQGAP	SPAC4F8.13c|rng2|I|IQGAP	5	5	5	>SPAC4F8.13c|rng2|I|IQGAP	1	5	5	5	4	1	4	1	4	1	3.1	3.1	3.1	171.67	1489	1489	0	9.2487	By MS/MS	By MS/MS	2.6	0.5	11488000	11488000	0	10715000	0	3	1	4				493	4783;5331;6804;8496;9132	True;True;True;True;True	5004;5574;7175;8953;9615	10067;11151;14858;18530;19913	9299;10289;13930;17309;18689	9299;10289;13930;17309;18689
SPAC4F8.14c|hcs1|I|3-hydroxy-3-methylglutaryl-CoA	SPAC4F8.14c|hcs1|I|3-hydroxy-3-methylglutaryl-CoA	5	5	5	>SPAC4F8.14c|hcs1|I|3-hydroxy-3-methylglutaryl-CoA synthase	1	5	5	5	4	3	4	3	4	3	17.4	17.4	17.4	49.238	447	447	0	29.421	By MS/MS	By MS/MS	11.6	11.2	52109000	30046000	22064000	28025000	0	3	2	5				494	1574;2623;2885;4931;9300	True;True;True;True;True	1659;2740;3014;5156;9789	3265;5483;6057;6058;10349;10350;20263;20264	3020;5093;5613;9561;9562;19020	3020;5093;5613;9561;19020
SPAC4G8.03c|puf5|I|pumilio	SPAC4G8.03c|puf5|I|pumilio	2	2	2	>SPAC4G8.03c|puf5|I|pumilio family RNA-binding protein Puf5 (predicted)	1	2	2	2	2	1	2	1	2	1	2.6	2.6	2.6	88.227	780	780	0	3.8972	By MS/MS	By MS/MS	2.6	1.4	8081700	5589000	2492800	5213100	0	2	1	3				495	6707;8519	True;True	7071;8978	14654;18571;18572	13737;17350;17351	13737;17350
SPAC4G9.03|adk1|I|adenylate	SPAC4G9.03|adk1|I|adenylate	1	1	1	>SPAC4G9.03|adk1|I|adenylate kinase Adk1	1	1	1	1	1	1	1	1	1	1	5	5	5	24.375	220	220	0.0080175	1.362	By MS/MS	By MS/MS	5	5	16268000	7782100	8486000	0	8486000	1	1	2				496	4664	TRUE	4884	9858;9859	9109;9110	9110
SPAC4G9.08c|rpc2|I|DNA-directed	SPAC4G9.08c|rpc2|I|DNA-directed	11	11	11	>SPAC4G9.08c|rpc2|I|DNA-directed RNA polymerase III complex subunit Rpc2	1	11	11	11	10	8	10	8	10	8	15.3	15.3	15.3	130.24	1165	1165	0	19.781	By MS/MS	By MS/MS	13.2	10.8	106470000	51223000	55245000	50549000	52473000	6	5	11				497	248;3061;3379;3783;4000;4032;4218;4312;4985;6174;6449	True;True;True;True;True;True;True;True;True;True;True	261;3198;3527;3957;4183;4219;4416;4517;5218;6512;6804	572;573;6468;6469;7099;8004;8005;8462;8463;8555;8556;8966;9158;9159;10472;13486;13487;14073	530;5999;6000;6579;7411;7817;7905;8265;8445;8446;9671;12669;12670;13210	530;6000;6579;7411;7817;7905;8265;8445;9671;12669;13210
SPAC4G9.09c|arg11|I|N-acetyl-gamma-glutamyl-phosphate	SPAC4G9.09c|arg11|I|N-acetyl-gamma-glutamyl-phosphate	12	12	12	>SPAC4G9.09c|arg11|I|N-acetyl-gamma-glutamyl-phosphate reductase/acetylglutamate kinase	1	12	12	12	11	8	11	8	11	8	18.5	18.5	18.5	97.704	885	885	0	54.265	By MS/MS	By MS/MS	16.8	13.9	509670000	255540000	254130000	218050000	274430000	11	7	18				498	743;1494;1563;2902;2970;5671;5848;6044;7383;8777;9065;9214	True;True;True;True;True;True;True;True;True;True;True;True	777;1576;1647;3031;3102;5981;6163;6371;7777;9244;9542;9699	1600;1601;3111;3247;6091;6092;6093;6241;12338;12339;12340;12341;12737;12738;12739;12740;13162;16075;16076;19087;19088;19763;20065;20066	1469;1470;2883;3004;5642;5643;5776;11611;11612;11613;11614;11972;11973;11974;12358;15035;17828;18547;18825	1470;2883;3004;5642;5776;11612;11972;12358;15035;17828;18547;18825
SPAC4G9.11c|cmb1|I|cytosine-mismatch	SPAC4G9.11c|cmb1|I|cytosine-mismatch	3	3	3	>SPAC4G9.11c|cmb1|I|cytosine-mismatch binding protein 1	1	3	3	3	2	3	2	3	2	3	20.2	20.2	20.2	26.304	223	223	0	8.8703	By MS/MS	By MS/MS	15.2	20.2	41129000	16348000	24781000	0	24781000	1	2	3				499	4119;5153;7713	True;True;True	4310;5393;8125	8746;8747;8748;8749;10804;10805;16798	8073;8074;8075;9969;9970;15704	8074;9970;15704	193	61
SPAC4G9.13c|vps26|I|retromer	SPAC4G9.13c|vps26|I|retromer	2	2	2	>SPAC4G9.13c|vps26|I|retromer complex subunit Vps26	1	2	2	2	2	1	2	1	2	1	11.1	11.1	11.1	35.779	298	298	0	2.8509	By MS/MS	By matching	11.1	7	8761800	6523400	2238400	6084700	0	1	0	1				500	3127;3299	True;True	3264;3443	6604;6941;6942	6121;6439	6121;6439
SPAC4G9.15|ifa38|I|ketoreductase	SPAC4G9.15|ifa38|I|ketoreductase	2	2	2	>SPAC4G9.15|ifa38|I|ketoreductase involved in fatty acid elongation (predicted)	1	2	2	2	1	2	1	2	1	2	5.3	5.3	5.3	37.307	341	341	0	6.6721	By matching	By MS/MS	2.9	5.3	13454000	6541700	6912300	0	6912300	0	2	2				501	34;751	True;True	34;785	71;72;1619	62;1487	62;1487	194	183
SPAC4H3.10c|pyk1|I|pyruvate	SPAC4H3.10c|pyk1|I|pyruvate	36	36	36	>SPAC4H3.10c|pyk1|I|pyruvate kinase	1	36	36	36	35	30	35	30	35	30	78.6	78.6	78.6	55.514	509	509	0	285.57	By MS/MS	By MS/MS	77.6	74.5	4456200000	2226500000	2229700000	1769000000	2076600000	52	41	93				502	110;142;351;620;621;838;839;870;1648;2384;2489;2737;2824;2825;2826;3313;3495;3498;3951;3952;5134;5573;5742;6491;6492;6499;6587;7128;7543;7544;7545;7630;7919;8073;8516;9266	True;True;True;True;True;True;True;True;True;True;True;True;True;True;True;True;True;True;True;True;True;True;True;True;True;True;True;True;True;True;True;True;True;True;True;True	116;150;151;368;645;646;876;877;910;1736;2497;2604;2859;2860;2951;2952;2953;3457;3649;3652;4130;4131;5374;5858;5859;6055;6056;6846;6847;6855;6945;7510;7942;7943;7944;8035;8036;8342;8505;8506;8975;9754;9755	240;241;365;366;367;368;369;370;371;785;786;1339;1340;1341;1342;1343;1344;1794;1795;1796;1878;3401;4912;4913;4914;4915;5151;5152;5718;5719;5720;5721;5722;5723;5916;5917;5918;5919;5920;6970;6971;6972;6973;7356;7357;7358;7359;7363;7364;7365;7366;8344;8345;8346;8347;8348;8349;8350;8351;10767;10768;11927;11928;11929;11930;11931;12515;12516;12517;12518;12519;12520;14191;14192;14193;14194;14213;14214;1…	212;213;335;336;337;338;339;340;341;342;724;725;1222;1223;1224;1225;1226;1227;1645;1646;1647;1731;3152;4553;4554;4555;4774;4775;5294;5295;5296;5297;5298;5299;5482;5483;5484;5485;6464;6465;6466;6467;6468;6808;6809;6810;6811;6815;6816;6817;7713;7714;7715;7716;7717;7718;9939;9940;11065;11066;11067;11068;11069;11767;11768;11769;11770;11771;13330;13331;13332;13349;13507;13508;14556;15308;15309;15310;1…	213;339;724;1225;1227;1645;1646;1731;3152;4554;4774;5299;5483;5484;5485;6465;6810;6816;7715;7717;9939;11069;11769;13331;13332;13349;13507;14556;15308;15309;15311;15491;16145;16460;17346;18943	195;196;197;198;199;200;201;202	57;116;133;216;337;355;375;430
SPAC4H3.14c|rng8|I|contractile	SPAC4H3.14c|rng8|I|contractile	20	20	20	>SPAC4H3.14c|rng8|I|contractile ring myosin V regulator Rng8	1	20	20	20	19	12	19	12	19	12	56.8	56.8	56.8	39.799	345	345	0	161.92	By MS/MS	By MS/MS	54.2	38.8	834470000	540260000	294210000	368990000	390840000	27	11	38				503	117;656;859;1312;1383;1421;2570;2900;3618;3697;3971;4120;4397;5266;5911;6301;6302;6311;7780;8657	True;True;True;True;True;True;True;True;True;True;True;True;True;True;True;True;True;True;True;True	124;684;898;1382;1456;1496;1497;2686;3029;3780;3863;4150;4151;4311;4312;4606;5508;6231;6647;6648;6657;8194;9121;9122	253;254;1419;1847;1848;1849;2752;2878;2946;2947;2948;5370;5371;6085;6086;7620;7621;7785;8388;8389;8750;8751;8752;9297;9298;11021;11022;12869;12870;13754;13755;13756;13757;13758;13772;13773;16943;18845;18846;18847;18848	224;225;1302;1700;1701;1702;2532;2656;2724;2725;4995;4996;5636;5637;7047;7048;7202;7752;7753;8076;8077;8576;8577;8578;10170;10171;12093;12913;12914;12915;12916;12917;12930;12931;15838;17605;17606;17607	224;1302;1700;2532;2656;2725;4996;5637;7048;7202;7753;8077;8577;10170;12093;12914;12916;12931;15838;17607	203;204;205	33;74;93
SPCP31B10.07|eft202|III|translation;SPAC513.01c|eft201|I|translation	SPCP31B10.07|eft202|III|translation;SPAC513.01c|eft201|I|translation	45;45	45;45	44;44	>SPCP31B10.07|eft202|III|translation elongation factor 2 (EF-2) Eft2,B;>SPAC513.01c|eft201|I|translation elongation factor 2 (EF-2) Eft2,A	2	45	45	44	44	31	44	31	43	30	57.4	57.4	56.2	93.23	842	842;842	0	231.99	By MS/MS	By MS/MS	57.4	45.2	2167500000	1277600000	889830000	923400000	955840000	59	37	96				504	137;180;447;714;715;799;931;1112;1208;1437;1641;1642;1708;2067;2229;2449;2490;2590;2761;3316;3323;3346;3613;3614;3708;3709;3736;3737;3786;3909;3961;3963;4033;4418;5433;5666;5899;6531;6873;7331;8007;8083;8299;8431;8692	True;True;True;True;True;True;True;True;True;True;True;True;True;True;True;True;True;True;True;True;True;True;True;True;True;True;True;True;True;True;True;True;True;True;True;True;True;True;True;True;True;True;True;True;True	145;190;191;467;745;746;836;979;1166;1271;1515;1516;1729;1730;1797;2167;2168;2337;2563;2605;2707;2886;3460;3467;3468;3492;3493;3494;3773;3774;3775;3875;3876;3905;3906;3960;4088;4140;4142;4220;4627;5679;5976;6217;6218;6888;7247;7722;8436;8437;8516;8745;8887;9157	296;443;444;445;446;998;999;1000;1001;1532;1533;1534;1535;1718;1719;1720;1721;2004;2365;2561;2981;2982;3390;3391;3499;4266;4267;4268;4623;4624;4625;4626;5058;5059;5153;5154;5155;5414;5415;5777;5778;5779;6977;6978;6979;6980;6990;6991;6992;6993;7036;7037;7038;7039;7040;7041;7609;7610;7611;7612;7613;7811;7812;7813;7814;7815;7881;7882;7883;7884;8010;8011;8256;8257;8258;8368;8370;8371;8372;8373;8557;8…	262;413;414;415;416;921;922;923;924;925;1403;1404;1405;1406;1578;1579;1580;1845;2180;2360;2759;2760;3142;3143;3240;3963;3964;3965;4295;4296;4297;4298;4691;4776;4777;4778;5030;5351;5352;6471;6472;6473;6474;6484;6485;6486;6487;6525;6526;6527;6528;6529;6530;7037;7038;7039;7040;7226;7227;7228;7229;7289;7290;7291;7416;7417;7636;7637;7638;7733;7735;7736;7737;7738;7906;7907;8605;8606;10523;10524;11601;1…	262;414;922;1405;1406;1580;1845;2180;2360;2759;3142;3143;3240;3963;4298;4691;4777;5030;5351;6471;6487;6526;7039;7040;7227;7229;7289;7290;7417;7636;7733;7735;7906;8606;10523;11601;12063;13412;14061;14925;16321;16475;16937;17202;17676	206;207;208;209;210;211;212;213;214;215;216	22;275;289;335;337;361;437;588;593;619;676
SPAC513.05|ams1|I|alpha-mannosidase	SPAC513.05|ams1|I|alpha-mannosidase	11	11	11	>SPAC513.05|ams1|I|alpha-mannosidase Ams1 (predicted)	1	11	11	11	10	9	10	9	10	9	13.8	13.8	13.8	122.44	1077	1077	0	26.366	By MS/MS	By MS/MS	13.1	11.3	83881000	41450000	42431000	35742000	45352000	9	8	17				505	176;912;1697;2000;2531;6236;6599;7530;7744;8701;9003	True;True;True;True;True;True;True;True;True;True;True	185;958;1785;2100;2647;6579;6957;7929;8157;9166;9478	436;1969;3480;4139;4140;5288;5289;13611;13612;14422;14423;16355;16356;16866;16867;18939;18940;19561;19562;19563;19564	405;1814;3223;3850;4915;4916;12784;12785;13532;13533;15286;15287;15766;17691;18254;18255;18256	405;1814;3223;3850;4916;12784;13533;15287;15766;17691;18254
SPAC513.07|SPAC513.07|I|flavonol	SPAC513.07|SPAC513.07|I|flavonol	1	1	1	>SPAC513.07|SPAC513.07|I|flavonol reductase/cinnamoyl-CoA reductase family	1	1	1	1	1	0	1	0	1	0	3.9	3.9	3.9	37.461	336	336	0	3.8608	By MS/MS	By matching	3.9	0	0	0	0	0	0	1	0	1				506	2752	TRUE	2877	5760	5335	5335
SPAC521.03|SPAC521.03|I|short	SPAC521.03|SPAC521.03|I|short	9	9	9	>SPAC521.03|SPAC521.03|I|short chain dehydrogenase (predicted)	1	9	9	9	8	8	8	8	8	8	44.4	44.4	44.4	28.148	259	259	0	34.626	By MS/MS	By MS/MS	39.4	37.8	112170000	52016000	60154000	51834000	56837000	8	6	14				507	1386;2380;3615;5815;5977;6666;6948;7683;9047	True;True;True;True;True;True;True;True;True	1459;2493;3776;6130;6302;7026;7325;8090;9524	2881;2882;4905;4906;7614;12664;12665;13029;13030;13031;13032;14557;14558;15177;15178;16708;19732;19733	2659;4547;7041;11903;11904;12248;12249;12250;13646;13647;14218;14219;15619;18520	2659;4547;7041;11903;12248;13647;14218;15619;18520	217	184
SPAC521.04c|sst1|I|calcium	SPAC521.04c|sst1|I|calcium	2	2	2	>SPAC521.04c|sst1|I|calcium permease (predicted)	1	2	2	2	2	1	2	1	2	1	3	3	3	98.857	881	881	0	4.9511	By MS/MS	By MS/MS	3	1.2	13241000	10776000	2465600	0	2465600	2	1	3				508	2596;3171	True;True	2713;3310	5428;6691;6692	5041;6205;6206	5041;6206
SPAC56E4.03|SPAC56E4.03|I|aromatic	SPAC56E4.03|SPAC56E4.03|I|aromatic	7	7	7	>SPAC56E4.03|SPAC56E4.03|I|aromatic aminotransferase (predicted)	1	7	7	7	7	4	7	4	7	4	20.7	20.7	20.7	53.166	474	474	0	20.006	By MS/MS	By MS/MS	20.7	12.7	84902000	47717000	37184000	33172000	48520000	5	2	7				509	192;1118;1558;6135;8305;9125;9273	True;True;True;True;True;True;True	204;1172;1642;6472;8751;9608;9762	467;2377;3236;3237;13408;13409;18127;18128;19894;20195;20196	434;2190;2994;12602;12603;16948;16949;18672;18955	434;2190;2994;12603;16948;18672;18955
SPAC56E4.04c|cut6|I|acetyl-CoA/biotin	SPAC56E4.04c|cut6|I|acetyl-CoA/biotin	78	78	78	>SPAC56E4.04c|cut6|I|acetyl-CoA/biotin carboxylase	1	78	78	78	74	57	74	57	74	57	46.4	46.4	46.4	256.84	2280	2280	0	323.31	By MS/MS	By MS/MS	43	35.3	2147500000	1092900000	1054700000	857640000	1124700000	81	60	141				510	190;598;599;733;760;800;805;956;974;975;1142;1345;1409;1564;1634;1777;1833;2091;2162;2213;2259;2260;2324;2410;2591;2629;2718;2978;3015;3257;3445;3456;3768;3826;3829;3833;3851;3884;3930;4031;4479;4482;4946;5002;5003;5136;5214;5523;5546;5736;5747;5910;5914;5915;6093;6396;6459;6562;6648;6700;6766;6927;7014;7081;7276;7291;7501;7568;7977;8119;8310;8517;8563;8606;8699;8707;8962;8994	True;True;True;True;True;True;True;True;True;True;True;True;True;True;True;True;True;True;True;True;True;True;True;True;True;True;True;True;True;True;True;True;True;True;True;True;True;True;True;True;True;True;True;True;True;True;True;True;True;True;True;True;True;True;True;True;True;True;True;True;True;True;True;True;True;True;True;True;True;True;True;True;True;True;True;True;True;True	202;622;623;764;796;837;842;1005;1023;1024;1202;1416;1483;1648;1649;1721;1868;1925;2192;2267;2321;2367;2368;2369;2434;2523;2708;2746;2838;3112;3150;3399;3597;3608;3609;3940;3941;4001;4004;4008;4029;4063;4109;4218;4693;4696;5176;5177;5237;5238;5376;5455;5786;5819;5820;6049;6061;6229;6230;6235;6236;6427;6749;6814;6920;7008;7064;7137;7304;7393;7462;7666;7681;7898;7968;8406;8554;8756;8976;9025;9070;9…	463;464;1293;1294;1295;1567;1568;1643;1644;1645;1646;1722;1723;1724;1725;1738;1739;2049;2050;2090;2091;2092;2434;2818;2926;2927;3248;3249;3250;3373;3374;3624;3730;3731;3732;4316;4317;4455;4559;4560;4561;4562;4677;4678;4679;4680;4795;4975;4976;5416;5417;5495;5496;5678;5679;6260;6261;6262;6263;6343;6863;7245;7246;7270;7271;7272;7273;7972;7973;7974;8087;8088;8092;8093;8098;8099;8138;8139;8209;8210;8…	431;1185;1186;1437;1438;1509;1510;1511;1512;1581;1582;1583;1596;1887;1888;1926;1927;1928;1929;2242;2600;2705;2706;3005;3006;3007;3124;3125;3126;3355;3451;3452;3453;4009;4010;4131;4219;4220;4221;4344;4345;4346;4347;4448;4617;4618;5031;5032;5103;5104;5258;5795;5796;5797;5874;6368;6707;6708;6732;6733;6734;7381;7382;7383;7485;7486;7490;7494;7527;7528;7594;7595;7676;7903;7904;8763;8767;9611;9612;9613;…	431;1185;1186;1438;1512;1581;1596;1888;1926;1929;2242;2600;2705;3007;3125;3355;3451;4010;4131;4219;4345;4347;4448;4617;5032;5104;5258;5795;5874;6368;6707;6734;7382;7486;7490;7494;7528;7594;7676;7904;8763;8767;9612;9709;9710;9942;10083;10836;10898;11757;11778;12090;12099;12100;12496;13119;13228;13466;13620;13729;13867;14170;14353;14466;14832;14854;15235;15341;16265;16546;16960;17347;17437;17514;17…	218;219;220;221;222;223;224	107;355;588;703;999;1042;2123
SPAC56F8.03|tif52|I|translation	SPAC56F8.03|tif52|I|translation	6	6	6	>SPAC56F8.03|tif52|I|translation initiation factor eIF5B Tif52 (predicted)	1	6	6	6	4	3	4	3	4	3	7.8	7.8	7.8	119.93	1079	1079	0	23.207	By MS/MS	By MS/MS	4.3	4.7	27936000	18148000	9788100	0	9788100	4	2	6				511	861;3654;3685;6483;7982;9338	True;True;True;True;True;True	900;3820;3851;6838;8411;9828	1852;7699;7761;7762;14180;17414;20347	1705;7118;7180;13320;16271;19107	1705;7118;7180;13320;16271;19107
SPAC56F8.10|met9|I|methylenetetrahydrofolate	SPAC56F8.10|met9|I|methylenetetrahydrofolate	1	1	1	>SPAC56F8.10|met9|I|methylenetetrahydrofolate reductase Met9	1	1	1	1	1	0	1	0	1	0	1.8	1.8	1.8	69.011	603	603	0	3.5887	By MS/MS	By matching	1.8	0	6777400	6777400	0	6321500	0	1	0	1				512	7146	TRUE	7528	15580	14586	14586
SPAC57A10.02|cdr2|I|serine/threonine	SPAC57A10.02|cdr2|I|serine/threonine	6	6	6	>SPAC57A10.02|cdr2|I|serine/threonine protein kinase Cdr2	1	6	6	6	6	3	6	3	6	3	9.5	9.5	9.5	85.971	775	775	0	21.147	By MS/MS	By MS/MS	9.5	4.3	62987000	54470000	8516900	50806000	0	5	2	7				513	90;1089;3302;5045;5719;7800	True;True;True;True;True;True	94;1142;3446;5282;6032;8215	192;2317;2318;6945;6946;10590;12476;17005;17006	167;2140;2141;6442;9784;11733;15906;15907	167;2140;6442;9784;11733;15907
SPAC57A10.05c|pof1|I|F-box/WD	SPAC57A10.05c|pof1|I|F-box/WD	1	1	1	>SPAC57A10.05c|pof1|I|F-box/WD repeat protein protein Pof1	1	1	1	1	1	1	1	1	1	1	1.3	1.3	1.3	67.11	605	605	0	2.8089	By MS/MS	By MS/MS	1.3	1.3	12852000	7652100	5200300	0	5200300	1	1	2				514	3586	TRUE	3744	7555;7556	6988;6989	6988
SPAC57A10.12c|ura3|I|dihydroorotate	SPAC57A10.12c|ura3|I|dihydroorotate	2	2	2	>SPAC57A10.12c|ura3|I|dihydroorotate dehydrogenase Ura3	1	2	2	2	2	1	2	1	2	1	3.8	3.8	3.8	48.295	443	443	0.0015468	1.76	By MS/MS	By MS/MS	3.8	1.8	9936200	5539000	4397200	5166400	0	0	1	1				515	2051;8950	True;True	2151;9423	4235;4236;19450	3936;18159	3936;18159
SPAC57A7.04c|pabp|I|mRNA	SPAC57A7.04c|pabp|I|mRNA	11	11	11	>SPAC57A7.04c|pabp|I|mRNA export shuttling protein	1	11	11	11	10	11	10	11	10	11	19.8	19.8	19.8	71.512	653	653	0	33.898	By MS/MS	By MS/MS	18.4	19.8	200950000	86499000	114450000	83190000	111940000	7	11	18				516	378;420;527;2232;2417;2418;5544;6147;6473;8523;8846	True;True;True;True;True;True;True;True;True;True;True	395;438;548;2340;2530;2531;5816;5817;6485;6828;8982;9316	840;841;930;931;932;1153;1154;4630;4631;4991;4992;4993;4994;11762;11763;13431;13432;14160;14161;18578;18579;19226;19227	773;774;856;857;858;1059;4302;4303;4632;4633;4634;4635;10894;10895;12623;13304;17357;17358;17957;17958	774;858;1059;4303;4633;4634;10894;12623;13304;17357;17958	225	428
SPAC57A7.08|pzh1|I|serine/threonine	SPAC57A7.08|pzh1|I|serine/threonine	9	9	9	>SPAC57A7.08|pzh1|I|serine/threonine protein phosphatase Pzh1	1	9	9	9	8	7	8	7	8	7	28.5	28.5	28.5	57.131	515	515	0	42.057	By MS/MS	By MS/MS	21.9	23.7	170020000	69131000	100890000	65128000	98201000	5	6	11				517	263;1477;1491;2804;2892;3092;3739;3857;5632	True;True;True;True;True;True;True;True;True	276;1558;1572;2931;3021;3229;3908;4035;5941;5942	605;606;3079;3104;5877;5878;6071;6533;6534;7886;7887;8148;8149;12092;12093;12094	559;2852;2876;5442;5443;5623;6057;7293;7294;7536;7537;11220;11221	559;2852;2876;5442;5623;6057;7293;7536;11220	226	224
SPAC57A7.10c|sec21|I|coatomer	SPAC57A7.10c|sec21|I|coatomer	25	25	25	>SPAC57A7.10c|sec21|I|coatomer gamma subunit Sec21 (predicted)	1	25	25	25	24	18	24	18	24	18	35.6	35.6	35.6	100.93	905	905	0	90.486	By MS/MS	By MS/MS	34.6	21.9	450690000	247810000	202870000	220340000	207570000	22	17	39				518	55;181;387;1175;1719;1948;2102;3345;3497;3588;3600;3619;3678;6186;6247;6308;6720;6907;7094;7279;7404;7771;8123;8917;9141	True;True;True;True;True;True;True;True;True;True;True;True;True;True;True;True;True;True;True;True;True;True;True;True;True	56;192;404;1236;1237;1808;2046;2204;3491;3651;3746;3758;3781;3844;6528;6591;6654;7084;7284;7475;7669;7798;8185;8558;9389;9624	116;117;447;448;856;857;2506;2507;2508;2509;3517;3518;3977;3978;4333;7034;7035;7361;7362;7559;7560;7584;7622;7623;7751;13523;13524;13637;13638;13767;14679;14680;14681;15087;15088;15479;15480;15854;15855;15856;15857;16113;16927;17717;19376;19377;19929	101;102;417;787;788;2313;2314;3258;3259;3697;4026;6524;6813;6814;6992;6993;7014;7049;7050;7170;12702;12703;12809;12810;12925;13762;13763;13764;14134;14135;14499;14837;14838;15067;15823;16552;18093;18094;18704	102;417;787;2314;3259;3697;4026;6524;6814;6993;7014;7049;7170;12702;12810;12925;13764;14134;14499;14837;15067;15823;16552;18093;18704	227;228	261;271
SPAC57A7.12|ssz1|I|heat	SPAC57A7.12|ssz1|I|heat	5	5	5	>SPAC57A7.12|ssz1|I|heat shock protein Ssz1 (predicted)	1	5	5	5	5	3	5	3	5	3	12.5	12.5	12.5	61.285	566	566	0	15.324	By MS/MS	By MS/MS	12.5	8.3	48941000	28378000	20564000	19440000	27593000	4	1	5				519	1416;5486;6290;7751;8019	True;True;True;True;True	1491;5733;6635;8164;8451	2939;11491;13723;13724;16876;16877;17496;17497	2718;10612;12884;12885;15775;16350	2718;10612;12885;15775;16350
SPAC589.06c|SPAC589.06c|I|pho88	SPAC589.06c|SPAC589.06c|I|pho88	2	2	2	>SPAC589.06c|SPAC589.06c|I|pho88 family protein (predicted)	1	2	2	2	2	1	2	1	2	1	14.9	14.9	14.9	21.742	202	202	0	6.3362	By MS/MS	By MS/MS	14.9	6.9	22470000	14749000	7721100	13757000	0	2	1	3				520	4039;6713	True;True	4226;7077	8568;8569;14665	7916;7917;13747	7916;13747
SPAC589.12|cwh43|I|glycosylceramide	SPAC589.12|cwh43|I|glycosylceramide	2	2	2	>SPAC589.12|cwh43|I|glycosylceramide biosynthesis protein Cwh43 (predicted)	1	2	2	2	2	2	2	2	2	2	3.3	3.3	3.3	110.03	971	971	0	22.714	By MS/MS	By MS/MS	3.3	3.3	20485000	6059900	14425000	5529100	14548000	2	1	3				521	1129;3123	True;True	1186;3260	2403;2404;6597;6598;6599	2212;6115;6116	2212;6116
SPAC5D6.13|vps74|I|Golgi	SPAC5D6.13|vps74|I|Golgi	1	1	1	>SPAC5D6.13|vps74|I|Golgi phosphoprotein 3 family Vps74 (predicted)	1	1	1	1	1	0	1	0	1	0	5	5	5	38.375	337	337	0	3.1417	By MS/MS	By matching	5	0	5484000	5484000	0	5115100	0	1	0	1				522	8332	TRUE	8778	18192	17005	17005
SPAC5H10.04|SPAC5H10.04|I|NADPH	SPAC5H10.04|SPAC5H10.04|I|NADPH	1	1	1	>SPAC5H10.04|SPAC5H10.04|I|NADPH dehydrogenase (predicted)	1	1	1	1	0	1	0	1	0	1	2.1	2.1	2.1	43.813	382	382	0.001548	1.7718	By matching	By MS/MS	0	2.1	2003500	0	2003500	0	2003500	0	1	1				523	2793	TRUE	2919	5854	5421	5421
SPAC5H10.05c|SPAC5H10.05c|I|FAD	SPAC5H10.05c|SPAC5H10.05c|I|FAD	1	1	1	>SPAC5H10.05c|SPAC5H10.05c|I|FAD binding oxidoreductase (predicted)	1	1	1	1	1	1	1	1	1	1	5.6	5.6	5.6	22.104	196	196	0.001554	1.7991	By MS/MS	By MS/MS	5.6	5.6	6080800	2232300	3848500	0	3848500	1	1	2				524	2770	TRUE	2896	5807;5808	5375;5376	5376
SPAC5H10.06c|adh4|I|alcohol	SPAC5H10.06c|adh4|I|alcohol	14	14	14	>SPAC5H10.06c|adh4|I|alcohol dehydrogenase Adh4	1	14	14	14	14	11	14	11	14	11	46.7	46.7	46.7	40.674	379	379	0	138.32	By MS/MS	By MS/MS	46.7	37.7	2001900000	1047500000	954410000	788780000	1025000000	17	13	30				525	444;445;857;934;1508;1821;2374;2497;3184;3735;3789;4497;6021;7255	True;True;True;True;True;True;True;True;True;True;True;True;True;True	464;465;896;982;1590;1913;2487;2612;3323;3904;3963;4712;6348;7642;7643	992;993;994;995;1843;1844;2009;2010;2011;3130;3131;3132;3133;3712;3713;4895;5166;5167;6715;7877;7878;7879;7880;8016;8017;9526;9527;9528;9529;13119;13120;15800;15801;15802;15803	915;916;917;918;1696;1697;1850;1851;1852;2900;2901;2902;3435;4536;4789;4790;6228;7285;7286;7287;7288;7421;7422;8793;8794;8795;8796;12323;12324;14791;14792;14793;14794	915;918;1696;1852;2900;3435;4536;4790;6228;7285;7421;8796;12323;14794	229	146
SPAC5H10.10|SPAC5H10.10|I|NADPH	SPAC5H10.10|SPAC5H10.10|I|NADPH	3	3	3	>SPAC5H10.10|SPAC5H10.10|I|NADPH dehydrogenase (predicted)	1	3	3	3	3	3	3	3	3	3	10.2	10.2	10.2	44.983	392	392	0	6.6668	By MS/MS	By MS/MS	10.2	10.2	32936000	12635000	20301000	13633000	18453000	3	3	6				526	2134;3784;7253	True;True;True	2238;3958;7640	4397;4398;8006;8007;15796;15797	4077;4078;7412;7413;14787;14788	4078;7413;14787
SPAC607.05|rpn9|I|19S	SPAC607.05|rpn9|I|19S	2	2	2	>SPAC607.05|rpn9|I|19S proteasome regulatory subunit Rpn9	1	2	2	2	2	1	2	1	2	1	5.8	5.8	5.8	43.457	381	381	0	3.4016	By MS/MS	By MS/MS	5.8	3.4	5002700	3864700	1138000	3604700	0	2	1	3				527	3569;5144	True;True	3727;5384	7523;7524;10789	6960;6961;9958	6961;9958
SPAC607.06c|SPAC607.06c|I|metallopeptidase	SPAC607.06c|SPAC607.06c|I|metallopeptidase	2	2	2	>SPAC607.06c|SPAC607.06c|I|metallopeptidase (predicted)	1	2	2	2	2	2	2	2	2	2	2.6	2.6	2.6	68.57	612	612	0	7.2308	By MS/MS	By MS/MS	2.6	2.6	8843300	1464400	7379000	0	7379000	2	2	4				528	2286;5261	True;True	2395;5503	4724;4725;11009;11010	4388;4389;10159;10160	4388;10159
SPAC630.03|arp3|I|Arp2/3	SPAC630.03|arp3|I|Arp2/3	8	8	8	>SPAC630.03|arp3|I|Arp2/3 protein complex, actin-like protein subunit Arp3	1	8	8	8	6	8	6	8	6	8	30.2	30.2	30.2	47.373	427	427	0	39.164	By MS/MS	By MS/MS	20.1	30.2	84107000	35542000	48564000	37886000	43830000	6	7	13				529	672;1257;2318;4565;5806;6851;7082;8992	True;True;True;True;True;True;True;True	700;1324;2427;4784;6121;7224;7463;9467	1456;1457;2650;2651;4784;4785;9665;9666;12648;12649;14960;15448;19536;19537	1333;1334;2441;2442;4440;4441;8925;8926;11890;14023;14468;14469;18232;18233	1333;2441;4440;8926;11890;14023;14469;18232
SPAC630.05|gyp7|I|GTPase	SPAC630.05|gyp7|I|GTPase	1	1	1	>SPAC630.05|gyp7|I|GTPase activating protein Gyp7 (predicted)	1	1	1	1	1	1	1	1	1	1	1.6	1.6	1.6	86.792	743	743	0	3.9843	By MS/MS	By MS/MS	1.6	1.6	6437300	2733500	3703800	0	3703800	1	1	2				530	419	TRUE	437	928;929	854;855	854
SPAC630.08c|erg25|I|C-4	SPAC630.08c|erg25|I|C-4	6	6	6	>SPAC630.08c|erg25|I|C-4 methylsterol oxidase Erg25 (predicted)	1	6	6	6	5	6	5	6	5	6	22.3	22.3	22.3	35.802	300	300	0	17.184	By MS/MS	By MS/MS	22.3	22.3	170160000	81521000	88644000	79555000	85127000	3	4	7				531	2076;4168;4456;4476;8587;8959	True;True;True;True;True;True	2177;4364;4668;4690;9049;9434	4287;4288;8859;8860;9437;9438;9480;9481;18702;19474;19475	3984;3985;8168;8715;8716;8756;8757;17468;18182;18183	3984;8168;8715;8756;17468;18183
SPAC630.11|vps55|I|vacuolar	SPAC630.11|vps55|I|vacuolar	1	1	1	>SPAC630.11|vps55|I|vacuolar sorting protein Vps55 (predicted)	1	1	1	1	1	1	1	1	1	1	5.5	5.5	5.5	14.096	128	128	0.0022936	1.6608	By matching	By MS/MS	5.5	5.5	5011800	2134500	2877300	0	2877300	0	1	1				532	5856	TRUE	6171	12758;12759	11992	11992
SPAC630.12|SPAC630.12|I|mannose-ethanolamine	SPAC630.12|SPAC630.12|I|mannose-ethanolamine	2	2	2	>SPAC630.12|SPAC630.12|I|mannose-ethanolamine phosphate phosphodiesterase (predicted)	1	2	2	2	1	2	1	2	1	2	4	4	4	49.26	422	422	0	2.937	By MS/MS	By MS/MS	2.4	4	4636000	1816200	2819800	0	2819800	1	0	1				533	3559;9279	True;True	3715;9768	7501;7502;20206	6941;18963	6941;18963
SPAC630.13c|tsc2|I|tuberin	SPAC630.13c|tsc2|I|tuberin	5	5	5	>SPAC630.13c|tsc2|I|tuberin	1	5	5	5	5	3	5	3	5	3	3.9	3.9	3.9	154.81	1339	1339	0	9.5014	By MS/MS	By MS/MS	3.9	2.3	23132000	17658000	5474800	12674000	9271100	5	2	7				534	230;3892;4972;6354;7469	True;True;True;True;True	242;4071;5205;6703;7864	539;8220;8221;10448;10449;13867;13868;16224	501;7604;7605;9652;13019;13020;15166	501;7604;9652;13020;15166
SPAC630.14c|tup12|I|transcriptional	SPAC630.14c|tup12|I|transcriptional	1	1	1	>SPAC630.14c|tup12|I|transcriptional corepressor Tup12	1	1	1	1	1	1	1	1	1	1	2.7	2.7	2.7	65.56	598	598	0	2.6572	By MS/MS	By MS/MS	2.7	2.7	8578900	5327400	3251500	0	3251500	1	0	1				535	4904	TRUE	5129	10297;10298	9516;9517	9517
SPAC631.01c|acp2|I|F-actin	SPAC631.01c|acp2|I|F-actin	2	2	2	>SPAC631.01c|acp2|I|F-actin capping protein beta subunit Acp2	1	2	2	2	1	1	1	1	1	1	7.5	7.5	7.5	29.845	268	268	0.00078802	1.9351	By MS/MS	By MS/MS	3.7	3.7	2199900	0	2199900	0	2199900	1	1	2				536	459;5718	True;True	480;6031	1030;12475	949;11732	949;11732
SPAC631.02|bdf2|I|BET	SPAC631.02|bdf2|I|BET	3	3	3	>SPAC631.02|bdf2|I|BET family double bromodomain protein Bdf2	1	3	3	3	1	3	1	3	1	3	4.4	4.4	4.4	81.031	727	727	0	2.3695	By matching	By MS/MS	1	4.4	5716800	371100	5345700	0	5345700	0	3	3				537	2108;6356;9126	True;True;True	2210;6705;9609	4346;13871;19895;19896	4036;13022;18673	4036;13022;18673
SPAC637.04|ypp1|I|cargo-transport	SPAC637.04|ypp1|I|cargo-transport	7	7	7	>SPAC637.04|ypp1|I|cargo-transport protein Ypp1 (predicted)	1	7	7	7	7	5	7	5	7	5	9.9	9.9	9.9	98.306	862	862	0	20.531	By MS/MS	By MS/MS	9.9	6.3	118690000	70664000	48023000	62565000	43728000	7	4	11				538	533;2975;4612;4833;6661;7091;8646	True;True;True;True;True;True;True	554;3108;4832;5056;7021;7472;9110	1165;6252;6253;9761;10163;10164;14547;14548;15472;15473;15474;15475;18827;18828	1070;5787;9014;9390;9391;13636;13637;14491;14492;14493;14494;14495;17587;17588	1070;5787;9014;9391;13637;14495;17587
SPAC637.05c|vma2|I|V-type	SPAC637.05c|vma2|I|V-type	10	10	10	>SPAC637.05c|vma2|I|V-type ATPase V1 subunit B	1	10	10	10	10	6	10	6	10	6	32.2	32.2	32.2	55.841	503	503	0	32.45	By MS/MS	By MS/MS	32.2	22.3	150790000	88941000	61851000	66215000	78595000	7	5	12				539	641;2858;3933;5254;5669;6336;6594;7413;7414;8713	True;True;True;True;True;True;True;True;True;True	666;2986;4112;5496;5979;6684;6952;7807;7808;9178	1378;5985;8306;8307;10999;11000;12333;12334;13828;13829;14413;14414;16129;16130;18963;18964	1258;5542;7681;7682;10150;10151;11606;11607;12983;12984;13524;15083;15084;17711	1258;5542;7682;10151;11606;12983;13524;15083;15084;17711
SPAC637.06|gmh5|I|alpha-1,2-galactosyltransferase	SPAC637.06|gmh5|I|alpha-1,2-galactosyltransferase	2	2	2	>SPAC637.06|gmh5|I|alpha-1,2-galactosyltransferase (predicted)	1	2	2	2	2	2	2	2	2	2	7.2	7.2	7.2	41.127	347	347	0	2.4471	By MS/MS	By MS/MS	7.2	7.2	17652000	10347000	7304400	9414200	7541600	1	2	3				540	6812;6863	True;True	7185;7237	14876;14877;14983;14984	13948;14046;14047	13948;14047
SPAC637.07|moe1|I|translation	SPAC637.07|moe1|I|translation	4	4	4	>SPAC637.07|moe1|I|translation initiation factor eIF3d Moe1	1	4	4	4	4	2	4	2	4	2	9	9	9	62.636	567	567	0	8.8217	By MS/MS	By MS/MS	9	5.1	37994000	26768000	11226000	22620000	13573000	4	1	5				541	1233;1379;5042;7420	True;True;True;True	1298;1452;5279;7814	2606;2873;2874;10585;16141;16142	2400;2652;9779;15094;15095	2400;2652;9779;15095
SPAC644.13c|SPAC644.13c|I|Rab	SPAC644.13c|SPAC644.13c|I|Rab	2	2	2	>SPAC644.13c|SPAC644.13c|I|Rab GTPase binding (predicted)	1	2	2	2	2	2	2	2	2	2	7.1	7.1	7.1	25.309	225	225	0	7.1924	By MS/MS	By MS/MS	7.1	7.1	21230000	10981000	10249000	10305000	10187000	2	2	4				542	5430;8714	True;True	5676;9179	11386;11387;18965;18966	10518;10519;17712;17713	10519;17713
SPBC18H10.14|rps1601|II|40S;SPAC664.04c|rps1602|I|40S	SPBC18H10.14|rps1601|II|40S;SPAC664.04c|rps1602|I|40S	6;6	6;6	6;6	>SPBC18H10.14|rps1601|II|40S ribosomal protein S16 (predicted);>SPAC664.04c|rps1602|I|40S ribosomal protein S16 (predicted)	2	6	6	6	5	6	5	6	5	6	50.7	50.7	50.7	15.395	140	140;140	0	43.765	By MS/MS	By MS/MS	40.7	50.7	140690000	69287000	71401000	61296000	74731000	5	6	11				543	343;438;7767;8526;8652;8826	True;True;True;True;True;True	359;458;8180;8985;9116;9294	760;761;978;979;16911;16912;18584;18585;18839;19182;19183	701;702;902;903;15808;15809;17361;17362;17599;17914;17915	702;903;15809;17361;17599;17915
SPAC664.05|rpl13|I|60S	SPAC664.05|rpl13|I|60S	7	7	7	>SPAC664.05|rpl13|I|60S ribosomal protein L13 (predicted)	1	7	7	7	7	7	7	7	7	7	37.5	37.5	37.5	23.529	208	208	0	32.892	By MS/MS	By MS/MS	37.5	37.5	91767000	52801000	38966000	33926000	54289000	7	6	13				544	2433;2699;3991;6613;8029;8030;8124	True;True;True;True;True;True;True	2546;2819;4174;6971;8461;8462;8559	5020;5021;5642;5643;8446;8447;14444;14445;17515;17516;17517;17518;17718;17719	4658;5226;7803;7804;7805;7806;13553;13554;16367;16368;16369;16553;16554	4658;5226;7805;13553;16367;16368;16554
SPAC664.10|klp2|I|minus-end	SPAC664.10|klp2|I|minus-end	2	2	2	>SPAC664.10|klp2|I|minus-end directed microtubule motor kinesin-14, Klp2	1	2	2	2	2	1	2	1	2	1	3.1	3.1	3.1	91.042	817	817	0	3.9168	By MS/MS	By MS/MS	3.1	1.1	10073000	6718400	3354500	6266500	0	1	1	2				545	3460;5121	True;True	3613;5361	7281;7282;10743	6741;6742;9917	6742;9917
SPAC664.11|ssc1|I|mitochondrial	SPAC664.11|ssc1|I|mitochondrial	19	19	19	>SPAC664.11|ssc1|I|mitochondrial heat shock protein Hsp70	1	19	19	19	18	18	18	18	18	18	35.8	35.8	35.8	72.976	674	674	0	94.147	By MS/MS	By MS/MS	35.6	35.8	1069000000	563440000	505580000	503310000	527820000	22	24	46				546	17;132;1051;1136;2991;3000;3001;4011;4629;5336;5662;6192;7336;7397;7532;7974;8055;8783;8784	True;True;True;True;True;True;True;True;True;True;True;True;True;True;True;True;True;True;True	17;140;1104;1194;3126;3135;3136;4196;4849;5579;5972;6534;7728;7791;7931;8403;8487;9250;9251	38;39;283;284;285;2243;2414;2415;2416;2417;6294;6295;6313;6314;6315;8488;8489;8490;8491;9787;9788;11162;11163;12319;12320;12321;12322;13532;13533;15973;15974;16098;16099;16100;16101;16358;16359;16360;17398;17399;17570;17571;17572;17573;19098;19099;19100;19101;19102;19103	35;36;251;252;2068;2222;2223;2224;2225;5827;5844;5845;5846;7838;7839;7840;7841;7842;9038;9039;10299;10300;11594;11595;11596;12710;12711;14940;14941;15054;15055;15056;15289;15290;15291;16257;16258;16418;16419;16420;17837;17838;17839;17840;17841;17842	36;252;2068;2222;5827;5844;5846;7841;9039;10300;11595;12710;14941;15055;15291;16257;16418;17840;17841
SPAC688.03c|SPAC688.03c|I|human	SPAC688.03c|SPAC688.03c|I|human	2	2	2	>SPAC688.03c|SPAC688.03c|I|human AMMECR1 homolog	1	2	2	2	2	2	2	2	2	2	10.4	10.4	10.4	22.234	193	193	0.0015528	1.7807	By matching	By MS/MS	10.4	10.4	12753000	6497900	6255400	5964500	6351700	0	2	2				547	618;6950	True;True	643;7327	1336;1337;15181;15182	1220;14221	1220;14221
SPAC688.11|end4|I|Huntingtin-interacting	SPAC688.11|end4|I|Huntingtin-interacting	8	8	8	>SPAC688.11|end4|I|Huntingtin-interacting protein homolog	1	8	8	8	8	5	8	5	8	5	7.7	7.7	7.7	124.37	1102	1102	0	17.279	By MS/MS	By MS/MS	7.7	5.2	46878000	26931000	19946000	18871000	26195000	6	0	6				548	436;509;1286;1471;2086;2698;6210;8479	True;True;True;True;True;True;True;True	456;530;1355;1552;2187;2818;6553;8936	974;975;1126;1127;2705;3067;4306;4307;5638;5639;5640;5641;13561;18495;18496	899;1034;2491;2841;4000;5224;5225;12737;17279	899;1034;2491;2841;4000;5225;12737;17279
SPAC694.02|SPAC694.02|I|DEAD/DEAH	SPAC694.02|SPAC694.02|I|DEAD/DEAH	29	29	29	>SPAC694.02|SPAC694.02|I|DEAD/DEAH box helicase	1	29	29	29	26	23	26	23	26	23	23.7	23.7	23.7	195.06	1717	1717	0	92.454	By MS/MS	By MS/MS	21.2	18.9	448950000	244690000	204260000	206500000	225990000	22	22	44				549	27;274;684;1374;1377;1500;1683;1720;2099;2164;2285;2407;2516;3168;3225;3726;4009;4043;4648;5422;6195;7233;7585;8018;8040;8077;8166;8481;8823	True;True;True;True;True;True;True;True;True;True;True;True;True;True;True;True;True;True;True;True;True;True;True;True;True;True;True;True;True	27;288;712;1447;1450;1582;1771;1809;2201;2269;2394;2520;2632;3307;3365;3894;4194;4230;4868;5667;6537;7620;7987;8450;8472;8510;8603;8938;9291	56;57;58;59;628;629;630;631;1475;1476;2866;2870;3118;3119;3459;3460;3519;3520;4330;4458;4722;4723;4966;4967;4968;4969;5255;5256;5257;5258;6686;6687;6792;6793;7852;7853;8485;8577;8578;9824;9825;11370;11371;13538;13539;15759;15760;16450;16451;17495;17538;17539;17623;17838;17839;18498;19177	49;50;51;52;578;579;580;1352;1353;2645;2650;2889;2890;3207;3260;3261;3262;4023;4133;4386;4387;4608;4609;4610;4611;4885;4886;6200;6201;6202;6301;6302;7262;7263;7835;7923;7924;9074;9075;10505;12716;12717;14754;15371;16349;16386;16387;16466;16674;16675;17281;17909	52;580;1353;2645;2650;2889;3207;3261;4023;4133;4387;4608;4886;6202;6302;7263;7835;7924;9075;10505;12717;14754;15371;16349;16387;16466;16675;17281;17909
SPAC694.04c|SPAC694.04c|I|conserved	SPAC694.04c|SPAC694.04c|I|conserved	1	1	1	>SPAC694.04c|SPAC694.04c|I|conserved eukaryotic protein	1	1	1	1	0	1	0	1	0	1	2.5	2.5	2.5	36.672	324	324	0.0015396	1.7033	By matching	By MS/MS	0	2.5	2257900	0	2257900	0	2257900	0	1	1				550	5057	TRUE	5294	10611	9802	9802
SPAC6B12.04c|SPAC6B12.04c|I|2-aminoadipate	SPAC6B12.04c|SPAC6B12.04c|I|2-aminoadipate	5	5	5	>SPAC6B12.04c|SPAC6B12.04c|I|2-aminoadipate transaminase (predicted)	1	5	5	5	5	4	5	4	5	4	11.6	11.6	11.6	47.569	421	421	0	15.317	By MS/MS	By MS/MS	11.6	10	41619000	23322000	18298000	23041000	17010000	4	3	7				551	480;1279;2289;4305;5180	True;True;True;True;True	501;1346;2398;4509;5421	1072;1073;2688;2689;4729;9143;9144;10859;10860	984;985;2478;4392;8433;8434;10026;10027	985;2478;4392;8434;10027
SPAC6B12.07c|SPAC6B12.07c|I|ubiquitin-protein	SPAC6B12.07c|SPAC6B12.07c|I|ubiquitin-protein	5	5	5	>SPAC6B12.07c|SPAC6B12.07c|I|ubiquitin-protein ligase E3 (predicted)	1	5	5	5	5	4	5	4	5	4	11.9	11.9	11.9	53.403	470	470	0	12.188	By MS/MS	By MS/MS	11.9	6.4	61584000	42389000	19194000	33325000	25407000	3	3	6				552	2040;3475;3476;4480;7922	True;True;True;True;True	2140;3628;3629;4694;8346	4210;4211;7306;7307;7308;7309;9490;9491;17288	3914;3915;6765;6766;6767;8764;8765;16154	3914;6766;6767;8764;16154
SPAC6B12.10c|spp1|I|DNA	SPAC6B12.10c|spp1|I|DNA	4	4	4	>SPAC6B12.10c|spp1|I|DNA primase catalytic subunit Spp1	1	4	4	4	2	4	2	4	2	4	9.9	9.9	9.9	52.009	454	454	0	8.2183	By MS/MS	By MS/MS	5.5	9.9	25394000	8023400	17371000	10540000	14315000	1	5	6				553	1388;4847;6823;9196	True;True;True;True	1461;5071;7196;9681	2885;2886;10188;10189;14900;20033	2661;2662;9412;9413;13969;18796	2661;9412;13969;18796
SPAC6B12.12|tom70|I|mitochondrial	SPAC6B12.12|tom70|I|mitochondrial	4	4	4	>SPAC6B12.12|tom70|I|mitochondrial TOM complex subunit Tom70 (predicted)	1	4	4	4	4	2	4	2	4	2	9.3	9.3	9.3	69.516	625	625	0	6.6733	By MS/MS	By MS/MS	9.3	4.5	18682000	11027000	7654400	8157900	9782000	4	1	5				554	5030;5705;7235;7655	True;True;True;True	5267;6018;7622;8061	10566;10567;12440;15763;16624;16625	9762;9763;11703;14756;15539	9762;11703;14756;15539
SPAC6B12.14c|SPAC6B12.14c|I|conserved	SPAC6B12.14c|SPAC6B12.14c|I|conserved	4	4	4	>SPAC6B12.14c|SPAC6B12.14c|I|conserved fungal protein	1	4	4	4	4	3	4	3	4	3	46.8	46.8	46.8	17.397	154	154	0	25.459	By MS/MS	By MS/MS	46.8	37.7	75467000	44859000	30608000	37289000	35161000	4	3	7				555	5505;5683;6164;8825	True;True;True;True	5760;5994;6502;9293	11627;11628;12363;13464;13465;19180;19181	10764;10765;11632;12650;12651;17912;17913	10765;11632;12651;17913	230	1
SPAC6B12.15|cpc2|I|RACK1	SPAC6B12.15|cpc2|I|RACK1	17	17	17	>SPAC6B12.15|cpc2|I|RACK1 ortholog Cpc2	1	17	17	17	17	13	17	13	17	13	73.2	73.2	73.2	34.851	314	314	0	131.63	By MS/MS	By MS/MS	73.2	57.6	1693900000	729290000	964610000	677950000	898640000	17	15	32				556	534;686;919;981;1056;2207;3324;3916;6124;6934;6935;7232;7916;8162;8811;9302;9346	True;True;True;True;True;True;True;True;True;True;True;True;True;True;True;True;True	555;714;965;1030;1031;1109;2315;3469;4095;6459;7311;7312;7619;8339;8599;9279;9791;9836	1166;1167;1478;1479;1978;2103;2104;2105;2106;2251;2252;2253;2254;4547;4548;4549;4550;6994;8275;8276;13377;13378;15142;15143;15144;15145;15757;15758;17275;17831;19155;19156;20267;20268;20269;20270;20362;20363	1071;1355;1356;1822;1939;1940;1941;1942;2075;2076;2077;2078;4209;4210;4211;6488;7654;7655;12574;14185;14186;14187;14188;14752;14753;16141;16669;17890;17891;19023;19024;19025;19026;19121	1071;1356;1822;1939;2076;4209;6488;7654;12574;14186;14187;14753;16141;16669;17891;19026;19121	231	217
SPAC6C3.04|cit1|I|citrate	SPAC6C3.04|cit1|I|citrate	11	11	11	>SPAC6C3.04|cit1|I|citrate synthase Cit1	1	11	11	11	9	9	9	9	9	9	26.9	26.9	26.9	54.16	483	483	0	36.104	By MS/MS	By MS/MS	23.2	23.6	204270000	100690000	103580000	88565000	108940000	7	8	15				557	414;1389;1390;1666;2274;4231;5447;5949;7031;7750;8790	True;True;True;True;True;True;True;True;True;True;True	432;1462;1463;1754;2383;4430;5693;6270;7410;8163;9258	917;918;919;920;2887;2888;3431;3432;4705;8993;11416;11417;12949;12950;15351;15352;16874;16875;19117;19118	846;847;848;2663;2664;3178;4371;8293;10547;12171;12172;14381;14382;14383;15773;15774;17854	847;2663;2664;3178;4371;8293;10547;12172;14382;15773;17854
SPAC6F12.05c|tnr3|I|thiamine	SPAC6F12.05c|tnr3|I|thiamine	4	4	4	>SPAC6F12.05c|tnr3|I|thiamine diphosphokinase Tnr3/ Nudix hydrolase fusion protein	1	4	4	4	2	4	2	4	2	4	13	13	13	64.235	569	569	0	8.5639	By MS/MS	By MS/MS	4.9	13	28876000	7544900	21331000	11232000	17137000	1	4	5				558	2948;3155;3430;3633	True;True;True;True	3077;3294;3581;3796	6180;6181;6661;7212;7213;7649	5721;6175;6678;6679;7074	5721;6175;6679;7074
SPAC6F12.06|rdi1|I|Rho	SPAC6F12.06|rdi1|I|Rho	1	1	1	>SPAC6F12.06|rdi1|I|Rho GDP dissociation inhibitor Rdi1 (predicted)	1	1	1	1	1	1	1	1	1	1	4.9	4.9	4.9	23.031	205	205	0.0052083	1.4919	By MS/MS	By matching	4.9	4.9	1656400	1137000	519370	0	519370	1	0	1				559	8604	TRUE	9068	18742;18743	17509	17509
SPAC6F12.08c|exo84|I|exocyst	SPAC6F12.08c|exo84|I|exocyst	9	9	9	>SPAC6F12.08c|exo84|I|exocyst complex subunit Exo84 (predicted)	1	9	9	9	8	5	8	5	8	5	17.1	17.1	17.1	68.592	584	584	0	24.264	By MS/MS	By MS/MS	15.1	8.2	59551000	42829000	16722000	32317000	24353000	7	4	11				560	2968;3249;3627;4006;4174;4436;7249;7737;8693	True;True;True;True;True;True;True;True;True	3100;3391;3789;4191;4370;4648;7636;8150;9158	6236;6851;7636;8478;8874;8875;9402;9403;15789;15790;16852;18921;18922	5772;6358;7062;7830;8179;8180;8682;8683;14779;14780;15753;17677	5772;6358;7062;7830;8180;8683;14780;15753;17677
SPAC6F12.10c|ade3|I|phosphoribosylformylglycinamidine	SPAC6F12.10c|ade3|I|phosphoribosylformylglycinamidine	17	17	17	>SPAC6F12.10c|ade3|I|phosphoribosylformylglycinamidine synthase Ade3 (predicted)	1	17	17	17	15	15	15	15	15	15	19.4	19.4	19.4	144.86	1323	1323	0	53.565	By MS/MS	By MS/MS	17.8	16.9	221530000	90442000	131090000	85398000	123550000	14	17	31				561	222;628;693;842;2015;2842;4159;4516;4576;5159;5465;6671;6985;7446;7833;8213;8490	True;True;True;True;True;True;True;True;True;True;True;True;True;True;True;True;True	234;653;722;880;2115;2969;4353;4732;4795;5399;5400;5711;7032;7364;7841;8250;8655;8947	523;524;1356;1357;1496;1497;1801;4164;4165;4166;5951;5952;8838;9567;9568;9691;9692;10819;10820;10821;11455;14570;14571;14572;14573;15263;16189;16190;17071;17072;17946;17947;17948;18515;18516	486;487;1238;1239;1370;1653;3871;3872;3873;5513;5514;8148;8833;8834;8948;8949;9983;9984;9985;10581;13656;13657;13658;14296;15135;15136;15962;16777;16778;16779;16780;17296	487;1238;1370;1653;3871;5513;8148;8833;8949;9984;10581;13658;14296;15135;15962;16779;17296	232	756
SPAC6F12.12|par2|I|protein	SPAC6F12.12|par2|I|protein	5	5	5	>SPAC6F12.12|par2|I|protein phosphatase PP2A regulatory subunit B-56 Par2	1	5	5	5	5	3	5	3	5	3	9.6	9.6	9.6	72.464	627	627	0	10.858	By MS/MS	By MS/MS	9.6	6.4	51414000	26843000	24571000	20661000	28947000	4	2	6				562	752;2018;2046;4737;6962	True;True;True;True;True	786;2118;2146;4957;7341	1620;1621;4170;4171;4224;9988;9989;15208	1488;3877;3878;3928;9227;9228;14243	1488;3877;3928;9228;14243
SPAC6F12.13c|fps1|I|geranyltranstransferase	SPAC6F12.13c|fps1|I|geranyltranstransferase	6	6	6	>SPAC6F12.13c|fps1|I|geranyltranstransferase Fps1	1	6	6	6	6	6	6	6	6	6	20.7	20.7	20.7	39.516	347	347	0	21.083	By MS/MS	By MS/MS	20.7	20.7	56074000	27602000	28472000	27187000	27031000	5	6	11				563	359;725;812;5985;6921;7685	True;True;True;True;True;True	376;756;849;6311;7298;8093	803;804;1551;1552;1751;1752;13046;13047;15112;15113;16713;16714	738;739;1420;1421;1605;1606;12263;12264;14156;14157;15622;15623	738;1421;1605;12263;14157;15622
SPAC6F12.14|cut23|I|anaphase-promoting	SPAC6F12.14|cut23|I|anaphase-promoting	1	1	1	>SPAC6F12.14|cut23|I|anaphase-promoting complex, TPR lobe subcomplex subunit Apc8	1	1	1	1	1	1	1	1	1	1	2.5	2.5	2.5	65.854	565	565	0	8.228	By MS/MS	By MS/MS	2.5	2.5	19263000	10575000	8688400	0	8688400	1	1	2				564	449	TRUE	469	1004;1005	927;928	928
SPAC6F12.15c|cut9|I|anaphase-promoting	SPAC6F12.15c|cut9|I|anaphase-promoting	8	8	8	>SPAC6F12.15c|cut9|I|anaphase-promoting complex, TPR lobe subcomplex subunit Cut9/Apc6	1	8	8	8	7	7	7	7	7	7	16.2	16.2	16.2	75.888	671	671	0	24.417	By MS/MS	By MS/MS	13.4	13.3	114200000	63407000	50796000	55211000	54726000	8	5	13				565	391;1989;2706;5446;5459;5460;6728;7895	True;True;True;True;True;True;True;True	409;2089;2826;5692;5705;5706;7098;8317	867;868;4118;4119;5657;5658;11415;11443;11444;11445;11446;11447;11448;14706;14707;17239	798;799;3831;3832;5241;5242;10546;10569;10570;10571;10572;10573;10574;13790;16106	798;3831;5242;10546;10570;10573;13790;16106
SPAC6F6.03c|nog2|I|ribosome	SPAC6F6.03c|nog2|I|ribosome	3	3	3	>SPAC6F6.03c|nog2|I|ribosome export GTPase Nog2 (predicted)	1	3	3	3	2	3	2	3	2	3	6	6	6	59.913	537	537	0	7.7834	By MS/MS	By MS/MS	3.9	6	22735000	10501000	12235000	0	12235000	1	1	2				566	3757;4962;8321	True;True;True	3929;5195;8767	7952;7953;10434;10435;18165	7360;9642;16982	7360;9642;16982
SPAC6F6.07c|rps13|I|40S	SPAC6F6.07c|rps13|I|40S	9	9	9	>SPAC6F6.07c|rps13|I|40S ribosomal protein S13	1	9	9	9	9	8	9	8	9	8	53.6	53.6	53.6	16.953	151	151	0	38.634	By MS/MS	By MS/MS	53.6	46.4	365210000	210200000	155010000	152020000	179260000	9	9	18				567	64;528;529;2499;2633;4001;4654;8262;9044	True;True;True;True;True;True;True;True;True	65;549;550;2614;2750;2751;4184;4185;4874;8704;9521	134;135;1155;1156;1157;1158;5169;5170;5504;5505;5506;5507;8464;8465;8466;8467;9835;9836;18033;18034;18035;19728	116;117;1060;1061;1062;1063;4792;4793;5111;5112;5113;7818;7819;9085;9086;16861;16862;16863;18516	117;1061;1062;4792;5113;7819;9086;16861;18516	233	45
SPAC6F6.10c|arc2|I|ARP2/3	SPAC6F6.10c|arc2|I|ARP2/3	7	7	7	>SPAC6F6.10c|arc2|I|ARP2/3 actin-organizing complex subunit Arc34	1	7	7	7	6	6	6	6	6	6	20.5	20.5	20.5	36.974	317	317	0	23.576	By MS/MS	By MS/MS	18	17.4	96003000	50422000	45581000	43674000	48938000	5	5	10				568	3552;6019;6055;6576;6577;8240;8730	True;True;True;True;True;True;True	3708;6346;6383;6934;6935;8682;9195	7487;7488;13115;13116;13187;13188;14373;14374;14375;14376;17997;18994	6929;12319;12320;12383;12384;13486;13487;13488;13489;16827;17740	6929;12319;12384;13487;13489;16827;17740
SPAC6F6.12|atg24|I|autophagy	SPAC6F6.12|atg24|I|autophagy	2	2	2	>SPAC6F6.12|atg24|I|autophagy associated protein Atg24 (predicted)	1	2	2	2	1	2	1	2	1	2	4.7	4.7	4.7	46.376	401	401	0	2.9293	By MS/MS	By MS/MS	2	4.7	8480900	3022900	5458000	0	5458000	1	1	2				569	1217;7821	True;True	1280;8238	2578;17044;17045	2374;15939;15940	2374;15939
SPAC6F6.15|ypt5|I|GTPase	SPAC6F6.15|ypt5|I|GTPase	4	4	4	>SPAC6F6.15|ypt5|I|GTPase Ypt5	1	4	4	4	3	3	3	3	3	3	21.3	21.3	21.3	22.985	211	211	0	9.2176	By MS/MS	By MS/MS	15.6	17.5	22267000	10756000	11511000	10002000	11542000	3	2	5				570	4068;5380;6991;7475	True;True;True;True	4258;5623;7370;7870	8638;11265;11266;15275;16235;16236	7978;10397;14310;15176;15177	7978;10397;14310;15176
SPAC6G10.02c|tea3|I|cell	SPAC6G10.02c|tea3|I|cell	29	29	29	>SPAC6G10.02c|tea3|I|cell end marker Tea3	1	29	29	29	26	21	26	21	26	21	31.5	31.5	31.5	127.75	1125	1125	0	181.94	By MS/MS	By MS/MS	29.8	22.9	635730000	393810000	241920000	291220000	318030000	29	18	47				571	330;397;1203;1429;1569;1623;1661;1684;2085;2101;3089;3309;3801;3978;4899;4900;5174;5175;5907;6009;6855;7131;7443;7619;7947;8333;8609;8934;9185	True;True;True;True;True;True;True;True;True;True;True;True;True;True;True;True;True;True;True;True;True;True;True;True;True;True;True;True;True	346;415;1265;1505;1654;1710;1749;1772;2186;2203;3226;3453;3975;4158;5124;5125;5415;5416;6226;6336;7229;7513;7838;8024;8373;8779;9073;9407;9670	734;735;880;881;882;883;2551;2552;2959;3257;3355;3356;3357;3358;3424;3425;3461;4304;4305;4332;6525;6526;6961;6962;8039;8040;8403;8404;10285;10286;10287;10288;10848;10849;12858;12859;13091;13092;14969;14970;15552;15553;16184;16185;16549;17337;18193;18751;19412;19413;19414;20012;20013	676;809;810;811;2350;2351;2735;3013;3104;3105;3106;3107;3108;3172;3173;3208;3998;3999;4025;6051;6052;6456;7440;7441;7766;7767;9505;9506;9507;9508;10014;10015;12083;12084;12302;12303;14032;14033;14560;14561;15132;15472;16196;17006;17517;18128;18129;18778;18779	676;810;2350;2735;3013;3105;3172;3208;3998;4025;6052;6456;7441;7766;9506;9508;10014;10015;12084;12303;14033;14561;15132;15472;16196;17006;17517;18128;18779	234	74
SPAC6G10.03c|cld1|I|mitochondrial	SPAC6G10.03c|cld1|I|mitochondrial	7	7	7	>SPAC6G10.03c|cld1|I|mitochondrial cardiolipin-specific phospholipase Cld1 (predicted)	1	7	7	7	7	4	7	4	7	4	22.4	22.4	22.4	48.72	428	428	0	23.919	By MS/MS	By MS/MS	22.4	9.1	85266000	57713000	27553000	41841000	39544000	6	4	10				572	422;948;1761;1927;2729;3923;4948	True;True;True;True;True;True;True	440;997;1852;2024;2851;4102;5179	934;935;2036;3597;3598;3931;3932;5704;8287;10407;10408	860;861;1876;3334;3335;3653;3654;5280;7665;9617;9618	861;1876;3334;3654;5280;7665;9618
SPAC6G10.04c|pre5|I|20S	SPAC6G10.04c|pre5|I|20S	1	1	1	>SPAC6G10.04c|pre5|I|20S proteasome complex subunit alpha 6 subunit Pre5 (predicted)	1	1	1	1	1	1	1	1	1	1	6.2	6.2	6.2	30.11	272	272	0	3.5562	By MS/MS	By matching	6.2	6.2	9290900	3820000	5470800	0	5470800	1	0	1				573	3254	TRUE	3396	6858;6859	6364	6364
SPAC6G10.05c|trs120|I|TRAPP	SPAC6G10.05c|trs120|I|TRAPP	9	9	9	>SPAC6G10.05c|trs120|I|TRAPP complex subunit Trs120 (predicted)	1	9	9	9	9	5	9	5	9	5	8.4	8.4	8.4	137.76	1210	1210	0	17.497	By MS/MS	By MS/MS	8.4	4.6	47732000	31927000	15805000	20034000	25551000	6	3	9				574	93;590;1597;2667;5937;6824;7025;7525;8622	True;True;True;True;True;True;True;True;True	97;614;1682;2786;6258;7197;7404;7924;9086	198;1276;1277;3307;3308;5578;5579;12924;14901;14902;15339;16348;18771;18772	172;1170;1171;3060;5178;12144;13970;13971;14369;15280;17535;17536	172;1171;3060;5178;12144;13970;14369;15280;17536
SPAC6G10.07|cbc1|I|nuclear	SPAC6G10.07|cbc1|I|nuclear	1	1	1	>SPAC6G10.07|cbc1|I|nuclear cap-binding complex large subunit (predicted)	1	1	1	1	1	1	1	1	1	1	1	1	1	90.077	780	780	0.009908	1.1633	By matching	By MS/MS	1	1	3453200	1704600	1748600	0	1748600	0	1	1				575	3515	TRUE	3670	7418;7419	6867	6867
SPAC6G10.08|idp1|I|isocitrate	SPAC6G10.08|idp1|I|isocitrate	11	11	11	>SPAC6G10.08|idp1|I|isocitrate dehydrogenase Idp1 (predicted)	1	11	11	11	11	8	11	8	11	8	27.1	27.1	27.1	49.478	439	439	0	33.188	By MS/MS	By MS/MS	27.1	19.1	132540000	82213000	50328000	67175000	59836000	11	6	17				576	1140;1829;1880;2404;3167;4383;4401;5384;5786;7576;7938	True;True;True;True;True;True;True;True;True;True;True	1200;1921;1973;2517;3306;4592;4610;5627;6101;7976;8364	2430;2431;3725;3832;3833;4961;4962;6684;6685;9274;9303;9304;11271;11272;12615;12616;16428;16429;17320;17321	2239;3446;3544;3545;4603;4604;6198;6199;8554;8583;8584;10402;10403;11858;11859;15354;15355;16183;16184	2239;3446;3545;4604;6199;8554;8584;10403;11859;15354;16183
SPAC6G10.09|SPAC6G10.09|I|alpha	SPAC6G10.09|SPAC6G10.09|I|alpha	4	4	4	>SPAC6G10.09|SPAC6G10.09|I|alpha glucosidase I Gls1 (predicted)	1	4	4	4	4	3	4	3	4	3	6.1	6.1	6.1	92.888	808	808	0	7.6899	By MS/MS	By MS/MS	6.1	4.6	31109000	16002000	15107000	14926000	0	1	1	2				577	2150;4227;4683;7012	True;True;True;True	2255;4426;4903;7391	4428;4429;8985;9893;9894;15317;15318;15319	4107;8284;9141;14348;14349;14350	4107;8284;9141;14350
SPAC6G9.06c|pcp1|I|pericentrin	SPAC6G9.06c|pcp1|I|pericentrin	3	3	3	>SPAC6G9.06c|pcp1|I|pericentrin Pcp1	1	3	3	3	3	3	3	3	3	3	2.8	2.8	2.8	140.76	1208	1208	0	7.0359	By MS/MS	By MS/MS	2.8	2.8	32609000	17666000	14943000	15805000	15617000	1	1	2				578	6939;7034;7822	True;True;True	7316;7413;8239	15151;15152;15357;15358;17046;17047	14194;14387;15941	14194;14387;15941
SPAC6G9.07c|arc4|I|ARP2/3	SPAC6G9.07c|arc4|I|ARP2/3	1	1	1	>SPAC6G9.07c|arc4|I|ARP2/3 actin-organizing complex subunit Arc4	1	1	1	1	1	1	1	1	1	1	7.7	7.7	7.7	19.614	168	168	0	7.2386	By MS/MS	By MS/MS	7.7	7.7	10576000	5330500	5245000	0	5245000	0	1	1				579	7153	TRUE	7535	15590;15591	14597;14598	14598
SPCC330.14c|rpl2402|III|60S;SPAC6G9.09c|rpl2401|I|60S	SPCC330.14c|rpl2402|III|60S;SPAC6G9.09c|rpl2401|I|60S	1;1	1;1	1;1	>SPCC330.14c|rpl2402|III|60S ribosomal protein L24 (predicted);>SPAC6G9.09c|rpl2401|I|60S ribosomal protein L24 (predicted)	2	1	1	1	1	1	1	1	1	1	7.4	7.4	7.4	16.912	149	149;149	0	4.6694	By MS/MS	By MS/MS	7.4	7.4	42538000	20815000	21723000	0	21723000	1	1	2				580	2547	TRUE	2663	5325;5326	4951;4952	4951
SPAC6G9.14|puf4|I|pumilio	SPAC6G9.14|puf4|I|pumilio	2	2	2	>SPAC6G9.14|puf4|I|pumilio family RNA-binding protein Puf4 (predicted)	1	2	2	2	2	1	2	1	2	1	2.9	2.9	2.9	73.291	681	681	0	5.4295	By MS/MS	By MS/MS	2.9	1.5	10372000	6250200	4121900	5829800	0	2	1	3				581	4441;7304	True;True	4653;7694	9409;15899;15900	8689;14878;14879	8689;14879
SPAC732.02c|SPAC732.02c|I|fructose-2,6-bisphosphate	SPAC732.02c|SPAC732.02c|I|fructose-2,6-bisphosphate	1	1	1	>SPAC732.02c|SPAC732.02c|I|fructose-2,6-bisphosphate 2-phosphatase activity (predicted)	1	1	1	1	1	1	1	1	1	1	2.9	2.9	2.9	46.947	408	408	0.0080117	1.3605	By MS/MS	By MS/MS	2.9	2.9	7185400	3964800	3220700	0	3220700	0	1	1				582	8729	TRUE	9194	18992;18993	17738;17739	17738
SPAC750.01|SPAC750.01|I|aldo/keto;SPAC977.14c|SPAC977.14c|I|aldo/keto	SPAC750.01|SPAC750.01|I|aldo/keto;SPAC977.14c|SPAC977.14c|I|aldo/keto	1;1	1;1	1;1	>SPAC750.01|SPAC750.01|I|aldo/keto reductase family protein;>SPAC977.14c|SPAC977.14c|I|aldo/keto reductase, predicted calcium channel regulator	2	1	1	1	1	1	1	1	1	1	3.7	3.7	3.7	37.359	325	325;351	0	3.9075	By MS/MS	By MS/MS	3.7	3.7	8064900	5003100	3061900	0	3061900	1	1	2				583	4560	TRUE	4779	9654;9655	8914;8915	8914
SPAC767.01c|vps1|I|dynamin;SPBC12C2.08|dnm1|II|mitochondrial	SPAC767.01c|vps1|I|dynamin	40;2	40;2	40;2	>SPAC767.01c|vps1|I|dynamin family protein Vps1	2	40	40	40	38	37	38	37	38	37	66.4	66.4	66.4	75.79	678	678;781	0	323.31	By MS/MS	By MS/MS	62.5	62.1	4660600000	1512900000	3147700000	1338000000	3060800000	42	57	99				584	497;607;850;1340;1458;1742;2742;2747;3190;3191;3202;3571;3572;3630;3935;4067;4204;4567;4806;4865;5685;5707;5901;6024;6052;6551;6553;6590;6591;6636;6746;7185;7286;7674;7721;8175;8591;8767;9246;9250	True;True;True;True;True;True;True;True;True;True;True;True;True;True;True;True;True;True;True;True;True;True;True;True;True;True;True;True;True;True;True;True;True;True;True;True;True;True;True;True	518;632;888;1411;1538;1832;2865;2870;3329;3330;3342;3729;3730;3793;4114;4256;4257;4402;4786;5027;5028;5090;5996;6020;6220;6351;6379;6908;6909;6911;6948;6949;6995;7117;7569;7676;8081;8134;8612;8613;9054;9234;9734;9738	1102;1103;1311;1312;1814;1815;2807;2808;2809;3037;3038;3039;3040;3041;3042;3559;5735;5736;5746;5747;6724;6725;6726;6727;6747;7527;7528;7529;7530;7531;7532;7643;7644;8312;8313;8314;8636;8637;8936;8937;8938;8939;9669;9670;10107;10108;10109;10110;10111;10112;10226;10227;12366;12367;12368;12369;12445;12446;12447;12448;12843;12844;12845;12846;13124;13125;13179;13180;13181;14328;14329;14330;14331;14333…	1012;1013;1197;1198;1664;1665;2588;2589;2590;2813;2814;2815;2816;2817;2818;3298;5311;5312;5322;5323;6237;6238;6239;6240;6260;6963;6964;6965;6966;6967;6968;7068;7069;7687;7688;7689;7690;7976;7977;8237;8238;8239;8928;9338;9339;9340;9341;9342;9343;9450;11636;11637;11638;11708;11709;11710;11711;12070;12071;12072;12073;12327;12328;12375;12376;12377;13449;13450;13451;13453;13514;13515;13516;13517;13518…	1012;1197;1664;2588;2813;3298;5311;5322;6237;6240;6260;6963;6966;7068;7687;7976;8237;8928;9339;9450;11637;11711;12070;12328;12375;13450;13453;13514;13519;13595;13829;14663;14847;15605;15727;16696;17481;17811;18902;18911	235;236;237;238	227;300;600;664
SPAC7D4.02c|sfp47|I|Ubp4	SPAC7D4.02c|sfp47|I|Ubp4	1	1	1	>SPAC7D4.02c|sfp47|I|Ubp4 interactor Sfp47	1	1	1	1	1	0	1	0	1	0	4.8	4.8	4.8	46.782	415	415	0	2.313	By MS/MS	By matching	4.8	0	4725600	4725600	0	4407800	0	1	0	1				585	9350	TRUE	9840	20369	19127	19127
SPAC7D4.04|atg11|I|autophagy	SPAC7D4.04|atg11|I|autophagy	6	6	6	>SPAC7D4.04|atg11|I|autophagy protein Atg11	1	6	6	6	6	2	6	2	6	2	6.6	6.6	6.6	106.77	926	926	0	7.0518	By MS/MS	By MS/MS	6.6	2.1	24810000	19073000	5737400	13460000	10067000	5	1	6				586	5478;6260;7354;8670;9017;9191	True;True;True;True;True;True	5724;6605;7746;9135;9493;9676	11475;11476;13659;16011;18869;18870;19598;20025	10598;12828;14975;17629;17630;18288;18789	10598;12828;14975;17630;18288;18789
SPAC7D4.07c|trx1|I|cytosolic	SPAC7D4.07c|trx1|I|cytosolic	4	4	4	>SPAC7D4.07c|trx1|I|cytosolic thioredoxin Trx1	1	4	4	4	4	1	4	1	4	1	47.6	47.6	47.6	11.297	103	103	0	22.796	By MS/MS	By MS/MS	47.6	24.3	205120000	99111000	106010000	42783000	75353000	7	4	11				587	3295;5733;6480;8180	True;True;True;True	3439;6046;6835;8619;8620	6936;12500;14177;17877;17878;17879;17880;17881;17882;17883	6435;11754;13317;16712;16713;16714;16715;16716;16717;16718;16719	6435;11754;13317;16717	239	72
SPAC7D4.10|vma13|I|V-type	SPAC7D4.10|vma13|I|V-type	2	2	2	>SPAC7D4.10|vma13|I|V-type ATPase V1 subunit H (predicted)	1	2	2	2	1	2	1	2	1	2	4.9	4.9	4.9	51.436	450	450	0	9.3459	By MS/MS	By MS/MS	1.6	4.9	13866000	5400100	8465500	0	8465500	1	2	3				588	4918;6762	True;True	5143;7133	10324;10325;14781	9538;9539;13860	9538;13860
SPAC806.02c|SPAC806.02c|I|Par	SPAC806.02c|SPAC806.02c|I|Par	1	1	1	>SPAC806.02c|SPAC806.02c|I|Par A family ATPase/WD repeat iron cluster assembly fusion protein (predicted)	1	1	1	1	1	1	1	1	1	1	2.3	2.3	2.3	67.68	608	608	0	2.2624	By matching	By MS/MS	2.3	2.3	3449900	1363700	2086300	0	2086300	0	1	1				589	4044	TRUE	4231	8579;8580	7925	7925
SPAC806.04c|SPAC806.04c|I|protein-glutamate	SPAC806.04c|SPAC806.04c|I|protein-glutamate	2	2	2	>SPAC806.04c|SPAC806.04c|I|protein-glutamate O-methyltransferase (predicted)	1	2	2	2	1	2	1	2	1	2	4.8	4.8	4.8	49.894	438	438	0	10.677	By MS/MS	By MS/MS	1.6	4.8	11135000	4373300	6761200	0	6761200	1	2	3				590	3774;5575	True;True	3947;5861	7985;7986;11933	7394;7395;11071	7394;11071
SPAC806.07|ndk1|I|nucleoside	SPAC806.07|ndk1|I|nucleoside	3	3	3	>SPAC806.07|ndk1|I|nucleoside diphosphate kinase Ndk1	1	3	3	3	3	1	3	1	3	1	23.8	23.8	23.8	17.012	151	151	0	16.701	By MS/MS	By matching	23.8	6	5803300	3462400	2340900	3229600	0	3	0	3				591	1133;2583;7298	True;True;True	1190;2699;7688	2409;5396;5397;15888	2217;5015;14868	2217;5015;14868
SPAC821.03c|slf1|I|cell	SPAC821.03c|slf1|I|cell	1	1	1	>SPAC821.03c|slf1|I|cell cortex node protein Slf1	1	1	1	1	1	0	1	0	1	0	3.3	3.3	3.3	53.991	485	485	0	3.3529	By MS/MS	By matching	3.3	0	5620500	5620500	0	5242400	0	1	0	1				592	2269	TRUE	2378	4698	4364	4364
SPAC821.05|tif38|I|translation	SPAC821.05|tif38|I|translation	4	4	4	>SPAC821.05|tif38|I|translation initiation factor eIF3h (p40)	1	4	4	4	4	3	4	3	4	3	17.4	17.4	17.4	39.78	357	357	0	13.22	By MS/MS	By MS/MS	17.4	13.7	143330000	84754000	58574000	82981000	54646000	3	3	6				593	8;803;8037;8201	True;True;True;True	8;840;8469;8641	15;16;1732;1733;17532;17533;17915	13;14;1590;1591;16381;16749	14;1591;16381;16749
SPAC821.06|spn2|I|mitotic	SPAC821.06|spn2|I|mitotic	7	7	7	>SPAC821.06|spn2|I|mitotic and meiotic (sporulation) septin Spn2	1	7	7	7	7	5	7	5	7	5	30.8	30.8	30.8	38.129	331	331	0	18.094	By MS/MS	By MS/MS	30.8	23	127020000	69852000	57163000	69006000	53311000	7	3	10				594	4381;5269;5849;6453;7650;8613;8879	True;True;True;True;True;True;True	4590;5511;6164;6808;8056;9077;9351	9271;11027;11028;12741;12742;14080;14081;16609;16610;18756;18757;19304	8551;10175;10176;11975;11976;13215;13216;15522;17522;18030	8551;10176;11975;13216;15522;17522;18030
SPAC821.10c|sod1|I|superoxide	SPAC821.10c|sod1|I|superoxide	1	1	1	>SPAC821.10c|sod1|I|superoxide dismutase Sod1	1	1	1	1	1	0	1	0	1	0	12.3	12.3	12.3	15.912	154	154	0	2.9352	By MS/MS	By matching	12.3	0	2279400	2279400	0	2126100	0	1	0	1				595	7950	TRUE	8377	17344	16203	16203
SPAC821.11|pro1|I|gamma-glutamyl	SPAC821.11|pro1|I|gamma-glutamyl	3	3	3	>SPAC821.11|pro1|I|gamma-glutamyl phosphate reductase Pro1 (predicted)	1	3	3	3	2	3	2	3	2	3	10.6	10.6	10.6	48.706	451	451	0	17.807	By MS/MS	By MS/MS	4.9	10.6	31313000	12041000	19272000	0	19272000	1	1	2				596	5636;6779;8584	True;True;True	5946;7150;9046	12101;14809;14810;18696;18697	11227;13887;17464	11227;13887;17464
SPAC821.12|orb6|I|serine/threonine	SPAC821.12|orb6|I|serine/threonine	1	1	1	>SPAC821.12|orb6|I|serine/threonine protein kinase Orb6	1	1	1	1	1	1	1	1	1	1	3.4	3.4	3.4	54.691	469	469	0	2.3256	By MS/MS	By matching	3.4	3.4	12797000	6925100	5872000	0	5872000	1	0	1				597	1726	TRUE	1815	3530;3531	3270	3270
SPAC821.13c|dnf1|I|Trans-golgi	SPAC821.13c|dnf1|I|Trans-golgi	1	1	1	>SPAC821.13c|dnf1|I|Trans-golgi network aminophospholipid translocase (flippase), Dnf1 (predicted)	1	1	1	1	1	0	1	0	1	0	0.4	0.4	0.4	176.72	1562	1562	0.0052122	1.5041	By MS/MS	By matching	0.4	0	7966800	7966800	0	7431000	0	1	0	1				598	1027	TRUE	1080	2201	2030	2030
SPAC823.03|ppk15|I|serine/threonine	SPAC823.03|ppk15|I|serine/threonine	14	14	14	>SPAC823.03|ppk15|I|serine/threonine protein kinase Ppk15 (predicted)	1	14	14	14	12	9	12	9	12	9	32.2	32.2	32.2	61.49	534	534	0	37.016	By MS/MS	By MS/MS	27.7	20	171640000	87268000	84371000	75451000	90318000	11	8	19				599	2582;3150;3471;4222;4316;5444;5503;6232;6233;6902;6918;7892;8326;9180	True;True;True;True;True;True;True;True;True;True;True;True;True;True	2698;3288;3624;4420;4521;5690;5758;6575;6576;7278;7295;8314;8772;9664	5394;5395;6649;6650;7298;7299;8972;9164;9165;11412;11625;13604;13605;13606;13607;15075;15108;17232;18175;18176;20001;20002	5014;6164;6165;6757;6758;8271;8451;8452;10543;10762;12778;12779;12780;12781;14123;14152;14153;16099;16990;16991;18768;18769	5014;6165;6757;8271;8451;10543;10762;12778;12780;14123;14153;16099;16990;18768	240	1
SPAC823.11|sgp1|I|sphingosine-1-phosphate	SPAC823.11|sgp1|I|sphingosine-1-phosphate	1	1	1	>SPAC823.11|sgp1|I|sphingosine-1-phosphate phosphatase	1	1	1	1	1	1	1	1	1	1	1.9	1.9	1.9	46.846	411	411	0	2.6949	By MS/MS	By matching	1.9	1.9	6846700	3110100	3736600	0	3736600	1	0	1				600	1556	TRUE	1640	3232;3233	2992	2992
SPAC823.12|vps11|I|HOPs/CORVET	SPAC823.12|vps11|I|HOPs/CORVET	4	4	4	>SPAC823.12|vps11|I|HOPs/CORVET complex biquitin protein ligase E3 subunit Vps11 (predicted)	1	4	4	4	3	2	3	2	3	2	4.9	4.9	4.9	102.52	906	906	0	9.3731	By MS/MS	By MS/MS	4.1	1.7	16973000	10855000	6117200	10125000	0	3	2	5				601	3818;4692;4831;8420	True;True;True;True	3992;4912;5054;8876	8071;9910;10160;10161;18384	7470;9157;9387;9388;17180	7470;9157;9388;17180
SPAC824.04|swd22|I|mRNA	SPAC824.04|swd22|I|mRNA	3	3	3	>SPAC824.04|swd22|I|mRNA cleavage and polyadenylation specificity factor complex subunit, WD repeat protein Swd22	1	3	3	3	3	3	3	3	3	3	10.3	10.3	10.3	38.466	341	341	0	6.6097	By MS/MS	By MS/MS	10.3	10.3	18503000	8965300	9537400	8178000	9721600	2	2	4				602	2237;3890;7774	True;True;True	2345;4069;8188	4638;4639;8217;8218;16931;16932	4310;4311;7601;7602;15827	4310;7601;15827
SPAC824.05|vps16|I|HOPS/CORVET	SPAC824.05|vps16|I|HOPS/CORVET	3	3	3	>SPAC824.05|vps16|I|HOPS/CORVET complex subunit Vps16 (predicted)	1	3	3	3	3	2	3	2	3	2	4.7	4.7	4.7	95.188	835	835	0	6.8662	By MS/MS	By MS/MS	4.7	3.5	20730000	13306000	7424200	11260000	8574900	3	2	5				603	7159;8451;9159	True;True;True	7541;8908;9643	15607;15608;18444;18445;19966	14614;14615;17235;17236;18740	14614;17235;18740
SPAC824.07|glo2|I|glyoxalase	SPAC824.07|glo2|I|glyoxalase	4	4	4	>SPAC824.07|glo2|I|glyoxalase II	1	4	4	4	4	3	4	3	4	3	21.1	21.1	21.1	28.483	256	256	0	10.983	By MS/MS	By MS/MS	21.1	16.4	73843000	31869000	41974000	32363000	39336000	2	2	4				604	736;2219;3805;6794	True;True;True;True	767;2327;3979;7165	1574;4572;4573;8045;8046;14839;14840	1444;4233;4234;7445;13914	1444;4233;7445;13914
SPAC890.02c|alp7|I|centrosomal	SPAC890.02c|alp7|I|centrosomal	17	17	17	>SPAC890.02c|alp7|I|centrosomal transforming acidic coiled-coil (TACC) protein ortholog Alp7	1	17	17	17	17	3	17	3	17	3	48.9	48.9	48.9	53.175	474	474	0	71.42	By MS/MS	By MS/MS	48.9	8.2	251490000	244120000	7370300	227610000	7462900	19	2	21				605	2557;3781;4182;4247;5087;5106;5107;5306;5344;5945;5973;6045;6148;6204;6448;6721;9305	True;True;True;True;True;True;True;True;True;True;True;True;True;True;True;True;True	2673;3955;4378;4447;5325;5344;5345;5549;5587;6266;6298;6372;6486;6547;6803;7085;9794	5345;8001;8889;9020;10676;10707;10708;10709;11099;11100;11178;12939;13022;13023;13163;13164;13433;13434;13551;14072;14682;20274	4971;7408;8191;8318;9859;9884;9885;9886;10239;10240;10314;12161;12240;12241;12242;12359;12360;12624;12728;13209;13765;19029	4971;7408;8191;8318;9859;9884;9886;10240;10314;12161;12241;12360;12624;12728;13209;13765;19029
SPAC890.06|nup155|I|nucleoporin	SPAC890.06|nup155|I|nucleoporin	6	6	6	>SPAC890.06|nup155|I|nucleoporin Nup155	1	6	6	6	6	4	6	4	6	4	6.4	6.4	6.4	147.63	1315	1315	0	14.324	By MS/MS	By MS/MS	6.4	4.1	42289000	24769000	17521000	19137000	21486000	5	0	5				606	244;3180;3435;6585;7043;7045	True;True;True;True;True;True	256;3319;3587;6943;7422;7424	563;564;6709;7225;7226;14388;14389;15374;15375;15378	522;6222;6689;13500;13501;14403;14406	522;6222;6689;13500;14403;14406
SPAC890.07c|rmt1|I|type	SPAC890.07c|rmt1|I|type	2	2	2	>SPAC890.07c|rmt1|I|type I protein arginine N-methyltransferase Rmt1	1	2	2	2	2	2	2	2	2	2	8.2	8.2	8.2	39.018	340	340	0	2.9329	By MS/MS	By MS/MS	8.2	8.2	15292000	6810700	8481400	0	8481400	1	0	1				607	3970;9160	True;True	4149;9644	8386;8387;19967;19968	7750;7751;18741	7750;18741
SPAC890.08|rpl31|I|60S	SPAC890.08|rpl31|I|60S	3	3	3	>SPAC890.08|rpl31|I|60S ribosomal protein L31 (predicted)	1	3	3	3	1	3	1	3	1	3	25.7	25.7	25.7	13.261	113	113	0	7.3301	By MS/MS	By MS/MS	6.2	25.7	48708000	15060000	33648000	0	33648000	1	3	4				608	5455;6572;6708	True;True;True	5701;6930;7072	11433;11434;14368;14655	10560;10561;13482;13738	10560;13482;13738
SPAC8C9.04|SPAC8C9.04|I|Schizosaccharomyces	SPAC8C9.04|SPAC8C9.04|I|Schizosaccharomyces	2	2	2	>SPAC8C9.04|SPAC8C9.04|I|Schizosaccharomyces specific protein	1	2	2	2	2	0	2	0	2	0	9.7	9.7	9.7	67.035	647	647	0.0086269	1.2784	By MS/MS	By matching	9.7	0	18234000	18234000	0	17008000	0	2	0	2				609	5700;6660	True;True	6013;7020	12434;14546	11697;13635	11697;13635
SPAC8C9.14|prr1|I|transcription	SPAC8C9.14|prr1|I|transcription	30	30	30	>SPAC8C9.14|prr1|I|transcription factor Prr1	1	30	30	30	29	29	29	29	29	29	68.8	68.8	68.8	60.045	539	539	0	323.31	By MS/MS	By MS/MS	63.6	62.5	4471600000	2742700000	1728900000	1926300000	1794900000	54	45	99				610	517;650;909;1094;1099;2165;2705;2889;2890;2903;2904;3104;3562;3563;4056;4130;4469;5293;5294;5827;5875;6155;6184;6347;6353;6413;6822;8632;8633;8929	True;True;True;True;True;True;True;True;True;True;True;True;True;True;True;True;True;True;True;True;True;True;True;True;True;True;True;True;True;True	538;675;676;677;954;955;1147;1152;1153;2270;2271;2825;3018;3019;3032;3033;3241;3719;3720;4243;4244;4323;4682;4683;5536;5537;6142;6190;6493;6525;6526;6695;6696;6702;6766;7195;9096;9097;9402	1138;1393;1394;1395;1396;1397;1398;1399;1400;1401;1402;1403;1965;1966;2327;2328;2329;2336;2337;2338;2339;2340;2341;2342;2343;4459;4460;4461;4462;4463;4464;5653;5654;5655;5656;6066;6067;6068;6069;6094;6095;6096;6097;6098;6099;6100;6557;6558;6559;6560;7508;7509;7510;7511;8606;8607;8608;8609;8610;8611;8612;8613;8614;8774;8775;9468;9469;9470;11073;11074;11075;11076;12696;12697;12793;12794;12795;12796…	1045;1272;1273;1274;1275;1276;1277;1278;1279;1280;1281;1282;1810;1811;2149;2150;2156;2157;2158;2159;2160;2161;4134;4135;4136;4137;4138;5235;5236;5237;5238;5239;5240;5619;5620;5621;5644;5645;5646;5647;5648;5649;5650;6077;6078;6079;6080;6081;6946;6947;6948;6949;7949;7950;7951;7952;7953;7954;7955;7956;8096;8097;8744;8745;10215;10216;10217;11932;11933;12025;12026;12027;12028;12637;12694;12695;12696;1…	1045;1280;1810;2150;2156;4138;5239;5620;5621;5644;5647;6080;6946;6949;7955;8096;8744;10216;10217;11933;12027;12637;12695;13003;13018;13151;13968;17559;17561;18122	241;242;243;244;245;246;247;248;249;250	17;174;197;329;351;354;417;495;521;526
SPAC8C9.15c|tif225|I|translation	SPAC8C9.15c|tif225|I|translation	4	4	4	>SPAC8C9.15c|tif225|I|translation initiation factor eIF2B epsilon subunit	1	4	4	4	4	4	4	4	4	4	6.8	6.8	6.8	76.325	678	678	0	11.701	By MS/MS	By MS/MS	6.8	6.8	18998000	9907400	9090900	9594900	8737000	3	2	5				611	2176;3086;6664;8265	True;True;True;True	2284;3223;7024;8707	4491;4492;6520;6521;14553;14554;18041;18042	4163;4164;6047;13642;13643;16869	4164;6047;13642;16869
SPAC8C9.16c|mug63|I|TLDc	SPAC8C9.16c|mug63|I|TLDc	1	1	1	>SPAC8C9.16c|mug63|I|TLDc domain protein 1	1	1	1	1	0	1	0	1	0	1	6.4	6.4	6.4	21.454	188	188	0.0045045	1.5425	By matching	By MS/MS	0	6.4	0	0	0	0	0	0	1	1				612	7839	TRUE	8258	17122	16006	16006
SPAC8E11.02c|rad24|I|14-3-3	SPAC8E11.02c|rad24|I|14-3-3	10	9	9	>SPAC8E11.02c|rad24|I|14-3-3 protein Rad24	1	10	9	9	10	5	9	4	9	4	42.6	38.9	38.9	30.082	270	270	0	29.277	By MS/MS	By MS/MS	42.6	21.5	236330000	141180000	95157000	107880000	118960000	11	6	17				613	51;1204;2653;3024;3894;6316;7355;9040;9154;9155	True;False;True;True;True;True;True;True;True;True	52;1266;1267;2771;3159;4073;6663;7747;9517;9638;9639	107;108;109;2553;2554;2555;2556;5552;6360;8224;13787;13788;13789;16012;19721;19954;19955;19956;19957;19958;19959	93;94;95;2352;2353;2354;2355;5154;5891;7608;12945;12946;12947;14976;18510;18730;18731;18732;18733;18734;18735	94;2355;5154;5891;7608;12945;14976;18510;18731;18735	74	223
SPAC8E11.04c|SPAC8E11.04c|I|phospholipase	SPAC8E11.04c|SPAC8E11.04c|I|phospholipase	1	1	1	>SPAC8E11.04c|SPAC8E11.04c|I|phospholipase involved in depalmitoylation (predicted)	1	1	1	1	1	0	1	0	1	0	7.1	7.1	7.1	24.474	224	224	0	2.4322	By MS/MS	By matching	7.1	0	3553900	3553900	0	3314900	0	1	0	1				614	4244	TRUE	4443	9014	8312	8312
SPAC8E11.10|SPAC8E11.10|I|sorbose	SPAC8E11.10|SPAC8E11.10|I|sorbose	3	3	3	>SPAC8E11.10|SPAC8E11.10|I|sorbose reductase (predicted)	1	3	3	3	3	3	3	3	3	3	16.9	16.9	16.9	27.437	255	255	0	51.643	By MS/MS	By MS/MS	16.9	16.9	181690000	101880000	79813000	107820000	67021000	4	3	7				615	145;374;6687	True;True;True	154;391;7051	375;376;831;832;14612;14613;14614;14615	346;347;765;766;13704;13705;13706	346;765;13705
SPAC9.02c|SPAC9.02c|I|polyamine	SPAC9.02c|SPAC9.02c|I|polyamine	2	2	2	>SPAC9.02c|SPAC9.02c|I|polyamine N-acetyltransferase (predicted)	1	2	2	2	2	2	2	2	2	2	20.6	20.6	20.6	18.791	165	165	0	5.9804	By MS/MS	By MS/MS	20.6	20.6	23111000	14266000	8845000	13076000	9074800	1	1	2				616	557;4616	True;True	580;4836	1216;1217;9767;9768	1117;9019	1117;9019
SPAC9.03c|brr2|I|U5	SPAC9.03c|brr2|I|U5	72	72	72	>SPAC9.03c|brr2|I|U5 snRNP complex subunit Brr2	1	72	72	72	68	58	68	58	68	58	42.4	42.4	42.4	248.81	2176	2176	0	323.31	By MS/MS	By MS/MS	40	33.6	2408700000	1255400000	1153300000	1105900000	1218400000	78	61	139				617	88;127;300;388;503;522;863;1046;1071;1245;1445;1466;1580;1888;2120;2212;2551;2576;2592;2835;2946;2994;3035;3083;3088;3307;3502;3632;3727;3907;3947;3959;4175;4184;4212;4562;4681;4798;4836;5244;5327;5360;5372;5373;5435;5511;5965;6281;6291;6416;6569;6640;6641;6796;7111;7148;7316;7427;7557;7558;8063;8074;8249;8579;8694;8762;8835;8905;8944;9049;9050;9227	True;True;True;True;True;True;True;True;True;True;True;True;True;True;True;True;True;True;True;True;True;True;True;True;True;True;True;True;True;True;True;True;True;True;True;True;True;True;True;True;True;True;True;True;True;True;True;True;True;True;True;True;True;True;True;True;True;True;True;True;True;True;True;True;True;True;True;True;True;True;True;True	92;135;314;405;524;543;902;1099;1124;1311;1525;1546;1665;1981;2222;2320;2667;2692;2709;2962;3075;3129;3171;3220;3225;3451;3656;3795;3895;4086;4126;4138;4371;4380;4410;4781;4901;5019;5060;5486;5570;5603;5615;5616;5681;5769;6290;6626;6636;6769;6927;7000;7001;7167;7492;7530;7706;7821;7957;7958;8495;8507;8691;9041;9159;9229;9304;9305;9377;9417;9526;9527;9712	186;187;188;189;276;674;675;858;859;860;861;1115;1116;1145;1146;1855;2234;2235;2284;2285;2286;2287;2627;2628;3003;3004;3005;3006;3055;3056;3274;3851;3852;4367;4557;4558;5335;5336;5337;5383;5384;5418;5419;5420;5421;5937;5938;6178;6299;6300;6301;6387;6388;6389;6516;6523;6524;6955;6956;7372;7647;7648;7854;7855;8250;8251;8252;8253;8336;8337;8365;8876;8877;8892;8893;8955;8956;9660;9889;9890;9891;10093…	162;163;164;244;622;623;789;790;791;792;1024;1025;1052;1053;1708;2060;2061;2106;2107;2108;2109;2110;2111;2421;2777;2778;2779;2780;2831;2832;3029;3566;3567;3568;3569;4051;4217;4218;4961;4962;4963;5006;5033;5034;5035;5036;5500;5501;5719;5831;5832;5914;5915;5916;6043;6049;6050;6450;6451;6822;7072;7073;7264;7265;7630;7631;7632;7633;7708;7709;7730;8181;8182;8193;8194;8254;8255;8920;9138;9139;9325;9326…	163;244;622;792;1024;1053;1708;2061;2106;2421;2778;2832;3029;3567;4051;4217;4961;5006;5034;5501;5719;5832;5914;6043;6050;6450;6822;7072;7265;7632;7709;7730;8181;8194;8255;8920;9138;9326;9396;10137;10281;10338;10381;10385;10526;10802;12223;12871;12887;13155;13478;13608;13609;13917;14522;14589;14902;15104;15326;15328;16435;16462;16838;17458;17678;17804;17941;18075;18149;18523;18526;18850	251;252;253	1036;1215;1828
SPAC9.07c|SPAC9.07c|I|GTPase	SPAC9.07c|SPAC9.07c|I|GTPase	3	3	3	>SPAC9.07c|SPAC9.07c|I|GTPase Rbg1 (predicted)	1	3	3	3	3	2	3	2	3	2	12.3	12.3	12.3	40.375	366	366	0	6.6268	By MS/MS	By MS/MS	12.3	9.3	27415000	16618000	10796000	14191000	12106000	1	2	3				618	2453;3711;4986	True;True;True	2567;3878;5219	5066;5067;7818;7819;10473	4698;4699;7231;9672	4699;7231;9672
SPAC9.09|met26|I|homocysteine	SPAC9.09|met26|I|homocysteine	49	49	49	>SPAC9.09|met26|I|homocysteine methyltransferase Met26	1	49	49	49	49	38	49	38	49	38	67.7	67.7	67.7	85.339	764	764	0	310.12	By MS/MS	By MS/MS	67.7	57.5	3803100000	2143500000	1659600000	1660300000	1984000000	50	41	91				619	35;56;130;143;375;377;591;671;809;848;849;917;918;989;1304;1336;1498;1702;2153;2154;2586;2587;2605;2632;2731;3144;4145;4323;4662;4846;4862;4863;5054;5184;5675;6162;6502;6689;7905;8364;8582;8583;8623;8624;8853;8865;8866;8867;9307	True;True;True;True;True;True;True;True;True;True;True;True;True;True;True;True;True;True;True;True;True;True;True;True;True;True;True;True;True;True;True;True;True;True;True;True;True;True;True;True;True;True;True;True;True;True;True;True;True	35;57;138;152;392;394;615;699;846;886;887;963;964;1040;1374;1407;1580;1790;1791;2258;2259;2703;2704;2722;2749;2853;3282;4338;4528;4882;5070;5086;5087;5291;5425;5985;5986;6500;6858;7053;8328;8815;9044;9045;9087;9088;9323;9336;9337;9338;9796	73;74;118;279;372;373;833;834;835;836;838;839;1278;1279;1455;1746;1747;1810;1811;1812;1813;1975;1976;1977;2125;2126;2738;2739;2801;3116;3486;3487;3488;4438;4439;4440;4441;5405;5406;5407;5408;5409;5410;5450;5451;5502;5503;5709;5710;6636;6637;6638;6639;8803;8804;9177;9853;9854;9855;9856;10186;10187;10218;10219;10220;10221;10222;10605;10606;10607;10608;10865;10866;12347;12348;12349;13461;14218;14219…	63;64;103;247;343;344;767;768;769;770;772;1172;1173;1332;1600;1601;1660;1661;1662;1663;1819;1820;1821;1956;1957;2518;2519;2583;2887;3229;3230;3231;4115;4116;4117;4118;5023;5024;5025;5026;5027;5062;5063;5064;5109;5110;5285;5286;6152;6153;8118;8464;9104;9105;9106;9107;9411;9440;9441;9442;9443;9444;9796;9797;9798;9799;10033;10034;11618;11619;11620;12648;13352;13353;13354;13708;13709;13710;13711;1612…	64;103;247;344;767;772;1173;1332;1600;1661;1662;1820;1821;1957;2518;2583;2887;3229;4115;4117;5024;5025;5062;5110;5286;6152;8118;8464;9105;9411;9440;9444;9799;10034;11620;12648;13354;13708;16127;17082;17461;17463;17538;17541;17975;18001;18003;18005;19032	254;255;256;257;258	97;119;501;559;562
SPAC9.10|thi9|I|thiamine	SPAC9.10|thi9|I|thiamine	1	1	1	>SPAC9.10|thi9|I|thiamine transmembrane transporter Thi9	1	1	1	1	1	1	1	1	1	1	1.5	1.5	1.5	65.069	591	591	0	2.2181	By MS/MS	By MS/MS	1.5	1.5	4858700	1695500	3163200	0	3163200	1	1	2				620	5532	TRUE	5799	11723;11724	10858;10859	10858
SPAC922.07c|atd2|I|aldehyde	SPAC922.07c|atd2|I|aldehyde	1	1	1	>SPAC922.07c|atd2|I|aldehyde dehydrogenase (predicted)	1	1	1	1	1	1	1	1	1	1	2.2	2.2	2.2	54.027	496	496	0.004491	1.5371	By matching	By MS/MS	2.2	2.2	4164600	1988200	2176400	0	2176400	0	1	1				621	5378	TRUE	5621	11262;11263	10395	10395
SPAC926.02|SPAC926.02|I|conserved	SPAC926.02|SPAC926.02|I|conserved	1	1	1	>SPAC926.02|SPAC926.02|I|conserved fungal protein	1	1	1	1	1	1	1	1	1	1	2	2	2	51.248	443	443	0.0092659	1.2095	By MS/MS	By MS/MS	2	2	10398000	6969300	3429100	0	3429100	1	1	2				622	4766	TRUE	4986	10039;10040	9273;9274	9273
SPAC926.04c|hsp90|I|Hsp90	SPAC926.04c|hsp90|I|Hsp90	45	45	45	>SPAC926.04c|hsp90|I|Hsp90 chaperone	1	45	45	45	42	36	42	36	42	36	66.1	66.1	66.1	80.595	704	704	0	323.31	By MS/MS	By MS/MS	64.6	53.3	8086400000	3792200000	4294200000	3508100000	4101600000	65	53	118				623	316;570;836;967;1061;1216;1227;1357;1515;1559;1732;1765;1766;1781;1869;1870;2816;2933;3095;3297;3860;3982;3983;4008;4149;4467;4522;4687;5670;5808;5944;6191;6507;6618;7084;7160;7161;7384;7575;7601;8234;9231;9232;9262;9263	True;True;True;True;True;True;True;True;True;True;True;True;True;True;True;True;True;True;True;True;True;True;True;True;True;True;True;True;True;True;True;True;True;True;True;True;True;True;True;True;True;True;True;True;True	331;593;873;874;1016;1114;1279;1291;1429;1597;1643;1821;1856;1857;1872;1961;1962;1963;2943;3062;3232;3441;4038;4039;4164;4165;4166;4193;4342;4679;4680;4738;4907;5980;6123;6265;6533;6863;6864;6976;7465;7542;7543;7778;7975;8006;8676;9717;9718;9750;9751	706;707;1237;1238;1790;1791;1792;2080;2264;2265;2266;2267;2577;2596;2597;2843;3147;3238;3239;3539;3602;3603;3604;3629;3630;3802;3803;3804;3805;3806;5901;5902;5903;5904;6150;6151;6152;6153;6540;6541;6542;6543;6938;6939;8154;8155;8156;8157;8158;8159;8420;8421;8422;8423;8424;8425;8426;8481;8482;8483;8484;8811;8812;9457;9458;9459;9460;9461;9462;9463;9464;9465;9577;9578;9579;9580;9581;9582;9901;12335;…	651;652;1136;1137;1641;1642;1643;1917;2088;2089;2090;2091;2373;2391;2623;2917;2995;2996;3276;3339;3340;3341;3359;3517;3518;3519;3520;3521;5466;5467;5468;5469;5696;5697;5698;6062;6063;6064;6065;6066;6437;7541;7542;7543;7544;7545;7546;7783;7784;7785;7786;7787;7788;7832;7833;7834;8125;8126;8734;8735;8736;8737;8738;8739;8740;8741;8843;8844;8845;8846;8847;9148;9149;11608;11609;11610;11892;12156;12157;…	651;1137;1642;1917;2088;2373;2391;2623;2917;2996;3276;3339;3340;3359;3519;3521;5469;5698;6065;6437;7543;7786;7788;7834;8125;8738;8844;9149;11608;11892;12160;12708;13363;13562;14473;14617;14619;15036;15353;15442;16812;18859;18863;18931;18936	259;260;261;262;263;264	178;324;398;459;496;585
SPAC926.09c|fas1|I|fatty	SPAC926.09c|fas1|I|fatty	54	54	54	>SPAC926.09c|fas1|I|fatty acid synthase beta subunit Fas1	1	54	54	54	49	41	49	41	49	41	32.5	32.5	32.5	230.56	2073	2073	0	226.96	By MS/MS	By MS/MS	29.4	25.6	1492800000	799350000	693420000	718700000	720300000	50	43	93				624	215;285;286;544;962;1114;1147;1199;1205;1364;1531;1751;1756;1782;1886;1977;2083;2277;2337;2549;2601;2832;3016;3060;3161;3282;3491;4017;5032;5040;5041;5070;5192;5365;6564;6832;6917;7103;7426;7586;7962;8039;8042;8099;8185;8524;8594;8595;8638;8794;8828;8889;9043;9137	True;True;True;True;True;True;True;True;True;True;True;True;True;True;True;True;True;True;True;True;True;True;True;True;True;True;True;True;True;True;True;True;True;True;True;True;True;True;True;True;True;True;True;True;True;True;True;True;True;True;True;True;True;True	227;299;300;565;1011;1168;1208;1261;1268;1437;1613;1842;1847;1873;1979;2077;2184;2386;2447;2665;2718;2959;3151;3197;3300;3425;3645;4202;5269;5277;5278;5307;5433;5608;6922;7205;7294;7484;7820;7988;8390;8471;8474;8533;8625;8983;9058;9059;9102;9262;9296;9361;9520;9620	509;510;648;649;650;1186;2061;2367;2368;2447;2544;2557;2853;3182;3183;3578;3579;3580;3581;3588;3631;3632;3633;3634;3849;4091;4092;4093;4300;4301;4711;4817;5329;5330;5437;5438;5931;5932;6344;6345;6464;6465;6466;6467;6671;6672;6914;6915;7348;7349;8502;8503;10570;10581;10582;10583;10584;10638;10639;10880;10881;11211;11212;11213;11214;14353;14354;14916;15106;15107;15496;15497;16151;16452;16453;16454;…	471;472;596;597;598;1087;1898;2182;2255;2344;2356;2632;2946;2947;3316;3317;3318;3319;3325;3360;3361;3362;3363;3364;3564;3809;3810;3995;3996;4376;4466;4955;4956;5049;5050;5496;5875;5876;5996;5997;5998;6186;6187;6415;6416;6803;7852;7853;9765;9776;9777;9778;9825;9826;10045;10347;10348;10349;10350;13469;13470;13982;14150;14151;14512;15103;15372;15373;15374;15375;15376;16230;16231;16232;16233;16234;16…	471;596;598;1087;1898;2182;2255;2344;2356;2632;2946;3319;3325;3362;3564;3810;3996;4376;4466;4956;5050;5496;5875;5998;6186;6415;6803;7852;9765;9776;9778;9825;10045;10347;13470;13982;14151;14512;15103;15374;16233;16384;16391;16511;16725;17359;17488;17490;17569;17860;17919;18049;18515;18698	265	1060
SPAC959.03c|utp7|I|U3	SPAC959.03c|utp7|I|U3	4	4	4	>SPAC959.03c|utp7|I|U3 snoRNP-associated protein Utp7 (predicted)	1	4	4	4	3	2	3	2	3	2	10.2	10.2	10.2	59.757	520	520	0	9.2712	By MS/MS	By MS/MS	6.9	5.2	23252000	10084000	13168000	9405600	0	2	2	4				625	2177;3996;5537;7559	True;True;True;True	2285;4179;5806;7959	4493;8455;8456;11741;16399	4165;7812;10874;15329	4165;7812;10874;15329
SPAC959.08|rpl2102|I|60S;SPBC365.03c|rpl2101|II|60S	SPAC959.08|rpl2102|I|60S	3;1	3;1	3;1	>SPAC959.08|rpl2102|I|60S ribosomal protein L21 (predicted)	2	3	3	3	3	3	3	3	3	3	23.8	23.8	23.8	18.353	160	160;160	0	12.312	By MS/MS	By MS/MS	23.8	23.8	61548000	28202000	33346000	20510000	39141000	2	3	5				626	6134;6394;6604	True;True;True	6471;6747;6962	13406;13407;13965;13966;14431;14432	12600;12601;13116;13541;13542	12600;13116;13542
SPAC959.09c|apc5|I|anaphase-promoting	SPAC959.09c|apc5|I|anaphase-promoting	5	5	5	>SPAC959.09c|apc5|I|anaphase-promoting complex, platform subcomplex scaffold TPR subunit Apc5	1	5	5	5	4	4	4	4	4	4	8.9	8.9	8.9	86.048	744	744	0	11.324	By MS/MS	By MS/MS	6.9	6.6	18584000	11135000	7449000	8715900	9119400	4	4	8				627	600;1006;2025;6814;7888	True;True;True;True;True	624;1057;2125;7187;8310	1296;1297;2157;4184;14880;14881;14882;14883;14884;17227;17228	1187;1988;3890;13950;13951;13952;13953;16095	1187;1988;3890;13950;16095
SPAC9E9.03|leu2|I|3-isopropylmalate	SPAC9E9.03|leu2|I|3-isopropylmalate	20	20	20	>SPAC9E9.03|leu2|I|3-isopropylmalate dehydratase Leu2 (predicted)	1	20	20	20	19	14	19	14	19	14	33.4	33.4	33.4	82.782	758	758	0	59.432	By MS/MS	By MS/MS	31.8	25.5	340540000	178710000	161830000	157850000	170670000	16	13	29				628	887;1372;1398;1449;1489;1727;1868;2226;2261;2879;2886;3023;3067;3068;5038;5597;7623;7897;8344;9014	True;True;True;True;True;True;True;True;True;True;True;True;True;True;True;True;True;True;True;True	927;1445;1472;1529;1570;1816;1960;2334;2370;3008;3015;3158;3204;3205;5275;5892;8028;8319;8791;9490	1908;2864;2909;2910;3015;3016;3101;3102;3532;3801;4585;4586;4681;4682;6041;6042;6059;6060;6357;6358;6359;6476;6477;6478;6479;6480;6481;10578;12004;16556;16557;17241;18214;18215;19591;19592	1759;2643;2688;2689;2791;2792;2873;2874;3271;3516;4245;4348;4349;5598;5599;5614;5888;5889;5890;6009;6010;6011;6012;9773;11138;15479;15480;16108;17028;17029;18283	1759;2643;2688;2792;2873;3271;3516;4245;4349;5598;5614;5888;6009;6012;9773;11138;15480;16108;17028;18283	266;267	552;734
SPAC9E9.04|SPAC9E9.04|I|bcap	SPAC9E9.04|SPAC9E9.04|I|bcap	3	3	3	>SPAC9E9.04|SPAC9E9.04|I|bcap family homolog (predicted)	1	3	3	3	2	1	2	1	2	1	20.7	20.7	20.7	21.238	188	188	0	14.864	By MS/MS	By MS/MS	13.3	7.4	60015000	33521000	26494000	31267000	0	2	1	3				629	325;721;1780	True;True;True	340;752;1871	724;1543;3628	667;1414;3358	667;1414;3358
SPAC9E9.06c|SPAC9E9.06c|I|threonine	SPAC9E9.06c|SPAC9E9.06c|I|threonine	2	2	2	>SPAC9E9.06c|SPAC9E9.06c|I|threonine synthase (predicted)	1	2	2	2	2	1	2	1	2	1	5.3	5.3	5.3	57.631	514	514	0	3.4484	By MS/MS	By MS/MS	5.3	2.5	7347400	6150000	1197400	5736300	0	0	1	1				630	2963;6376	True;True	3095;6728	6222;6223;13931	5761;13085	5761;13085
SPAC9E9.07c|ypt2|I|GTPase	SPAC9E9.07c|ypt2|I|GTPase	2	1	1	>SPAC9E9.07c|ypt2|I|GTPase Ypt2	1	2	1	1	1	2	0	1	0	1	14	8.5	8.5	22.755	200	200	0	3.7721	By matching	By MS/MS	5.5	14	6103600	0	6103600	0	6103600	0	0	0				631	4821;6481	False;True	5044;6836	10138;10139;14178	9368;9369;13318	9368;13318
SPAC9E9.09c|atd1|I|aldehyde	SPAC9E9.09c|atd1|I|aldehyde	31	31	31	>SPAC9E9.09c|atd1|I|aldehyde dehydrogenase (predicted)	1	31	31	31	30	26	30	26	30	26	71.8	71.8	71.8	54.768	503	503	0	215.27	By MS/MS	By MS/MS	71.8	62.2	3684000000	1944600000	1739400000	1578500000	1777900000	45	34	79				632	12;13;737;825;826;1367;1548;2298;2643;2950;2951;3211;3896;4177;4211;4603;5332;6534;7474;7669;7670;8047;8082;8269;8667;8712;8839;8847;8848;9355;9356	True;True;True;True;True;True;True;True;True;True;True;True;True;True;True;True;True;True;True;True;True;True;True;True;True;True;True;True;True;True;True	12;13;768;769;862;863;1440;1632;2407;2761;3079;3080;3081;3082;3351;4075;4373;4409;4823;5575;6891;7869;8076;8077;8479;8515;8712;9132;9177;9309;9317;9318;9845;9846	25;26;27;28;29;30;1575;1576;1577;1578;1772;1773;1774;1775;2857;2858;3213;3214;3215;3216;4743;4744;5524;5525;6183;6184;6185;6186;6187;6188;6189;6190;6761;6762;6763;6764;8227;8228;8229;8230;8880;8881;8954;9747;11152;11153;11154;11155;14291;16233;16234;16662;16663;16664;17552;17553;17554;17555;17630;17631;18048;18049;18050;18864;18865;18961;18962;19212;19228;19229;19230;19231;19232;19233;19234;19235…	23;24;25;26;27;1445;1446;1447;1448;1625;1626;1627;2636;2637;2976;2977;2978;2979;4405;5127;5128;5723;5724;5725;5726;5727;5728;5729;5730;5731;5732;6272;6273;6274;6275;7611;7612;7613;7614;8184;8253;9002;10290;10291;10292;10293;13417;15174;15175;15574;15575;16399;16400;16401;16402;16403;16404;16473;16474;16874;16875;16876;17624;17625;17710;17946;17959;17960;17961;17962;17963;17964;17965;17966;19134;1…	23;24;1448;1626;1627;2636;2978;4405;5127;5725;5731;6273;7611;8184;8253;9002;10293;13417;15175;15574;15575;16402;16474;16875;17624;17710;17946;17959;17964;19134;19136	268;269	395;499
SPAC9E9.11|plr1|I|pyridoxal	SPAC9E9.11|plr1|I|pyridoxal	3	3	3	>SPAC9E9.11|plr1|I|pyridoxal reductase Plr1	1	3	3	3	2	2	2	2	2	2	8.1	8.1	8.1	36.814	333	333	0	5.6978	By MS/MS	By MS/MS	5.1	5.1	16934000	8800800	8133000	8208900	0	1	2	3				633	7366;7987;9245	True;True;True	7760;8416;9733	16046;17423;20139;20140	15007;16279;18899;18900	15007;16279;18900
SPAC9G1.02|wis4|I|MAP	SPAC9G1.02|wis4|I|MAP	17	17	17	>SPAC9G1.02|wis4|I|MAP kinase kinase kinase Wis4	1	17	17	17	14	12	14	12	14	12	17.4	17.4	17.4	160.54	1401	1401	0	41.84	By MS/MS	By MS/MS	14.6	12.5	140830000	72554000	68274000	59685000	76263000	10	6	16				634	719;939;983;1015;1891;2082;2506;4254;4296;4950;4978;5999;7471;7863;8181;8849;8924	True;True;True;True;True;True;True;True;True;True;True;True;True;True;True;True;True	750;987;1033;1066;1984;2183;2622;4454;4500;5182;5211;6325;7866;8283;8621;9319;9397	1540;1541;2018;2109;2110;2174;2175;3859;3860;4299;5240;5241;9030;9128;10412;10458;13071;13072;16227;16228;17174;17175;17884;19236;19390;19391	1411;1412;1859;1945;2004;2005;3581;3994;4870;4871;8325;8420;9622;9659;12286;15169;16048;16049;16720;17967;18108	1411;1859;1945;2004;3581;3994;4871;8325;8420;9622;9659;12286;15169;16048;16720;17967;18108
SPAC9G1.03c|rpl3001|I|60S	SPAC9G1.03c|rpl3001|I|60S	2	2	2	>SPAC9G1.03c|rpl3001|I|60S ribosomal protein L30 (predicted)	1	2	2	2	2	1	2	1	2	1	33	33	33	11.591	109	109	0	4.4725	By MS/MS	By MS/MS	33	17.4	13437000	12059000	1378100	11248000	0	2	1	3				635	548;8303	True;True	569;8749	1192;1193;18124	1094;1095;16945	1094;16945
SPAC9G1.05|aip1|I|actin	SPAC9G1.05|aip1|I|actin	6	6	6	>SPAC9G1.05|aip1|I|actin cortical patch component Aip1	1	6	6	6	5	5	5	5	5	5	10.9	10.9	10.9	65.266	595	595	0	18.615	By MS/MS	By MS/MS	9.4	7.9	32327000	17482000	14845000	16439000	14712000	4	4	8				636	2210;3538;3910;6375;8328;8852	True;True;True;True;True;True	2318;3693;4089;6727;8774;9322	4554;7462;8259;8260;13929;13930;18181;18182;18183;18184;19241;19242	4215;6906;7639;13083;13084;16996;16997;17973;17974	4215;6906;7639;13083;16997;17974
SPAC9G1.06c|cyk3|I|cytokinesis	SPAC9G1.06c|cyk3|I|cytokinesis	3	3	3	>SPAC9G1.06c|cyk3|I|cytokinesis protein Cyk3 (predicted)	1	3	3	3	3	1	3	1	3	1	4.5	4.5	4.5	98.262	886	886	0	5.6153	By MS/MS	By MS/MS	4.5	1.9	15823000	9930300	5892200	9262400	0	2	1	3				637	728;4605;9304	True;True;True	759;4825;9793	1556;9749;9750;20273	1425;9004;9005;19028	1425;9004;19028
SPAC9G1.11c|spn4|I|mitotic	SPAC9G1.11c|spn4|I|mitotic	1	1	1	>SPAC9G1.11c|spn4|I|mitotic septin Spn4	1	1	1	1	0	1	0	1	0	1	2.4	2.4	2.4	44.773	380	380	0.0037793	1.5896	By matching	By MS/MS	0	2.4	0	0	0	0	0	0	1	1				638	8544	TRUE	9006	18626	17400	17400
SPACUNK4.07c|cta4|I|P-type	SPACUNK4.07c|cta4|I|P-type	10	10	10	>SPACUNK4.07c|cta4|I|P-type ATPase, calcium transporting Cta4	1	10	10	10	8	6	8	6	8	6	12	12	12	136.26	1211	1211	0	33.896	By MS/MS	By MS/MS	9.8	6.4	63580000	36750000	26830000	32113000	28995000	7	4	11				639	437;3674;5167;5514;5727;7307;7615;7807;8410;8808	True;True;True;True;True;True;True;True;True;True	457;3840;5408;5774;6040;7697;8020;8223;8864;9276	976;977;7743;7744;10838;11672;12489;15905;15906;16540;17016;18366;18367;19151	900;901;7163;7164;10004;10812;11744;14884;15464;15916;17165;17886	900;7163;10004;10812;11744;14884;15464;15916;17165;17886
SPACUNK4.10|SPACUNK4.10|I|glyoxylate	SPACUNK4.10|SPACUNK4.10|I|glyoxylate	6	6	6	>SPACUNK4.10|SPACUNK4.10|I|glyoxylate reductase (predicted)	1	6	6	6	4	6	4	6	4	6	24	24	24	36.701	334	334	0	16.061	By MS/MS	By MS/MS	16.5	24	87126000	35598000	51528000	38716000	46015000	4	6	10				640	2426;2540;5738;6735;7745;8352	True;True;True;True;True;True	2539;2656;6051;7105;8158;8801	5010;5011;5306;12508;14719;14720;16868;16869;18229;18230	4648;4649;4931;11760;13801;13802;15767;15768;17041;17042	4648;4931;11760;13802;15768;17042
SPACUNK4.12c|iph1|I|insulinase	SPACUNK4.12c|iph1|I|insulinase	1	1	1	>SPACUNK4.12c|iph1|I|insulinase pombe homologue 1	1	1	1	1	1	1	1	1	1	1	1.4	1.4	1.4	112.14	969	969	0	3.1088	By matching	By MS/MS	1.4	1.4	6963500	2274600	4688900	0	4688900	0	1	1				641	4613	TRUE	4833	9762;9763	9015	9015
SPACUNK4.15|SPACUNK4.15|I|2',3'-cyclic-nucleotide	SPACUNK4.15|SPACUNK4.15|I|2',3'-cyclic-nucleotide	1	1	1	>SPACUNK4.15|SPACUNK4.15|I|2,3-cyclic-nucleotide 3-phosphodiesterase (predicted)	1	1	1	1	1	1	1	1	1	1	4.3	4.3	4.3	23.655	208	208	0.0092924	1.2458	By matching	By MS/MS	4.3	4.3	4566000	2106500	2459500	0	2459500	0	1	1				642	7391	TRUE	7785	16088;16089	15046	15046
SPACUNK4.16c|SPACUNK4.16c|I|alpha,alpha-trehalose-phosphate	SPACUNK4.16c|SPACUNK4.16c|I|alpha,alpha-trehalose-phosphate	30	30	30	>SPACUNK4.16c|SPACUNK4.16c|I|alpha,alpha-trehalose-phosphate synthase (predicted)	1	30	30	30	29	24	29	24	29	24	48.3	48.3	48.3	106.82	944	944	0	144.58	By MS/MS	By MS/MS	47	38.9	1468100000	648680000	819400000	538700000	832800000	36	26	62				643	790;835;1295;1640;1709;2631;2887;3145;3384;3508;3546;3650;3659;3764;4525;5393;5604;5789;6036;6228;6229;6279;6540;7069;7496;7686;7869;7951;8016;8436	True;True;True;True;True;True;True;True;True;True;True;True;True;True;True;True;True;True;True;True;True;True;True;True;True;True;True;True;True;True	827;872;1365;1728;1798;2748;3016;3283;3532;3663;3701;3815;3825;3936;4741;5636;5901;5902;6104;6363;6571;6572;6624;6897;7450;7893;8094;8095;8289;8378;8448;8892;8893	1701;1702;1788;1789;2719;3387;3388;3389;3500;5501;6061;6062;6063;6064;6640;6641;7108;7403;7404;7473;7474;7690;7713;7714;7964;7965;9586;9587;11297;11298;12020;12021;12022;12621;12622;13149;13150;13597;13598;13599;13600;13701;13702;13703;13704;14300;14301;15427;15428;16289;16715;16716;16717;16718;17185;17186;17345;17346;17347;17488;17489;17490;18412;18413;18414;18415	1562;1563;1639;1640;2504;3139;3140;3141;3241;5108;5615;5616;5617;6154;6155;6587;6854;6855;6915;6916;7110;7135;7136;7372;7373;8850;8851;10430;10431;11154;11155;11156;11863;11864;12347;12348;12771;12772;12773;12774;12866;12867;12868;12869;13425;14447;14448;14449;15227;15624;15625;15626;15627;16058;16059;16204;16205;16206;16342;16343;16344;17208;17209;17210;17211	1563;1639;2504;3140;3241;5108;5616;6155;6587;6854;6915;7110;7135;7372;8850;10430;11156;11863;12347;12772;12773;12869;13425;14449;15227;15627;16058;16205;16342;17209	270;271;272;273;274	180;188;660;714;787
SPAP27G11.10c|nup184|I|nucleoporin	SPAP27G11.10c|nup184|I|nucleoporin	1	1	1	>SPAP27G11.10c|nup184|I|nucleoporin Nup184	1	1	1	1	1	1	1	1	1	1	0.5	0.5	0.5	176.96	1564	1564	0.00079491	2.0142	By MS/MS	By matching	0.5	0.5	4636600	2294400	2342100	0	2342100	1	0	1				644	6012	TRUE	6339	13099;13100	12307	12307
SPAP27G11.12|SPAP27G11.12|I|human	SPAP27G11.12|SPAP27G11.12|I|human	1	1	1	>SPAP27G11.12|SPAP27G11.12|I|human HID1 ortholog 1	1	1	1	1	1	1	1	1	1	1	1.1	1.1	1.1	92.503	797	797	0	3.5562	By MS/MS	By MS/MS	1.1	1.1	2843000	2843000	0	2651800	0	1	1	2				645	153	TRUE	162	391;392	361;362	361
SPAP7G5.02c|gua2|I|GMP	SPAP7G5.02c|gua2|I|GMP	11	11	11	>SPAP7G5.02c|gua2|I|GMP synthase [glutamine-hydrolyzing] Gua2 (predicted)	1	11	11	11	10	11	10	11	10	11	22.6	22.6	22.6	60.044	539	539	0	27.09	By MS/MS	By MS/MS	22.6	22.6	149870000	69813000	80053000	66267000	78903000	7	10	17				646	78;411;3071;3466;3534;3787;3940;6788;7642;7644;8216	True;True;True;True;True;True;True;True;True;True;True	79;429;3208;3619;3689;3961;4119;7159;8048;8050;8658	155;912;913;6490;6491;7289;7290;7455;7456;8012;8013;8323;8324;14826;14827;16588;16589;16592;16593;16594;17951;17952	134;840;841;6020;6021;6750;6751;6900;6901;7418;7419;7699;13902;15507;15508;15510;15511;16783	134;841;6020;6750;6900;7418;7699;13902;15508;15511;16783
SPAP7G5.04c|lys1|I|aminoadipate-semialdehyde	SPAP7G5.04c|lys1|I|aminoadipate-semialdehyde	27	27	27	>SPAP7G5.04c|lys1|I|aminoadipate-semialdehyde dehydrogenase	1	27	27	27	22	24	22	24	22	24	27.8	27.8	27.8	156.89	1419	1419	0	102.51	By MS/MS	By MS/MS	22	25.4	515340000	245430000	269910000	223940000	274900000	22	22	44				647	201;508;878;1008;1034;1629;1846;2107;2342;2823;3239;3269;3310;4709;5076;5339;6078;6275;6770;7205;7410;7584;7842;8058;8537;8801;8956	True;True;True;True;True;True;True;True;True;True;True;True;True;True;True;True;True;True;True;True;True;True;True;True;True;True;True	213;529;918;1059;1087;1716;1938;2209;2452;2950;3381;3411;3454;4929;5313;5582;6409;6620;7141;7592;7804;7986;8261;8490;8999;9269;9431	483;1125;1889;2160;2210;3365;3760;3761;3762;3763;4344;4345;4827;4828;4829;5914;5915;6831;6832;6885;6886;6963;6964;6965;9938;9939;10648;10649;11170;11171;13269;13270;13693;13694;14795;14796;15700;15701;15702;15703;16125;16126;16448;16449;17127;17578;18613;18614;19137;19138;19139;19140;19469;19470	448;1033;1741;1991;2038;3116;3478;3479;3480;3481;4034;4035;4475;4476;4477;5480;5481;6340;6341;6388;6389;6457;6458;6459;9180;9181;9835;10307;12464;12465;12858;12859;13874;14704;14705;14706;15079;15080;15370;16011;16424;17388;17389;17872;17873;17874;17875;18177;18178	448;1033;1741;1991;2038;3116;3478;4035;4475;5481;6340;6389;6457;9180;9835;10307;12465;12859;13874;14705;15079;15370;16011;16424;17389;17872;18177
SPAP7G5.05|rpl1002|I|60S	SPAP7G5.05|rpl1002|I|60S	10	10	1	>SPAP7G5.05|rpl1002|I|60S ribosomal protein L10	1	10	10	1	6	10	6	10	1	1	48	48	5	25.359	221	221	0	38.929	By MS/MS	By MS/MS	26.7	48	209270000	67271000	141990000	81476000	115570000	6	10	16				648	245;267;663;2727;2872;3387;4180;4358;8532;8872	True;True;True;True;True;True;True;True;True;True	257;280;691;2849;3001;3535;4376;4565;8992;8993;9343	565;615;1437;1438;5700;5701;6020;6021;7113;8885;8886;9233;9234;18600;18601;18602;18603;19290	523;568;1318;5277;5580;5581;6592;8187;8188;8518;8519;17375;17376;17377;17378;18016	523;568;1318;5277;5581;6592;8187;8519;17377;18016	275	136
SPAP7G5.06|per1|I|plasma	SPAP7G5.06|per1|I|plasma	1	1	1	>SPAP7G5.06|per1|I|plasma membrane amino acid permease Per1	1	1	1	1	1	0	1	0	1	0	1.4	1.4	1.4	64.081	583	583	0	2.2138	By MS/MS	By matching	1.4	0	6355000	6355000	0	5927500	0	1	0	1				649	4355	TRUE	4562	9229	8515	8515
SPAP8A3.03|zrt2|I|ZIP	SPAP8A3.03|zrt2|I|ZIP	1	1	1	>SPAP8A3.03|zrt2|I|ZIP zinc transmembrane transporter Zrt2 (predicted)	1	1	1	1	1	1	1	1	1	1	1.5	1.5	1.5	50.277	453	453	0.0097902	1.0744	By matching	By MS/MS	1.5	1.5	5126300	2174900	2951400	0	2951400	0	1	1				650	7394	TRUE	7788	16092;16093	15049	15049
SPAP8A3.05|ski7|I|ski	SPAP8A3.05|ski7|I|ski	2	2	2	>SPAP8A3.05|ski7|I|ski complex interacting GTPase Ski7	1	2	2	2	2	2	2	2	2	2	2.2	2.2	2.2	77.881	695	695	0.0037679	1.5723	By MS/MS	By MS/MS	2.2	2.2	7038800000	1590100000	5448700000	2753900000	3899300000	3	3	6				651	4271;5481	True;True	4471;5727	9066;9067;11480;11481;11482;11483	8362;8363;10602;10603;10604;10605	8363;10604
SPAP8A3.07c|SPAP8A3.07c|I|phospho-2-dehydro-3-deoxyheptonate	SPAP8A3.07c|SPAP8A3.07c|I|phospho-2-dehydro-3-deoxyheptonate	4	4	4	>SPAP8A3.07c|SPAP8A3.07c|I|phospho-2-dehydro-3-deoxyheptonate aldolase (predicted)	1	4	4	4	4	3	4	3	4	3	16.1	16.1	16.1	40.638	372	372	0	13.763	By MS/MS	By MS/MS	16.1	9.7	41322000	19980000	21341000	19936000	20042000	3	1	4				652	1215;1524;2624;8443	True;True;True;True	1278;1606;2741;8900	2575;2576;3162;3163;5484;5485;18428	2372;2930;2931;5094;5095;17223	2372;2931;5094;17223
SPAP8A3.08|cdc4|I|myosin	SPAP8A3.08|cdc4|I|myosin	2	2	2	>SPAP8A3.08|cdc4|I|myosin II light chain	1	2	2	2	2	2	2	2	2	2	11.3	11.3	11.3	15.661	141	141	0	2.6023	By MS/MS	By MS/MS	11.3	11.3	22399000	9976900	12422000	0	12422000	1	1	2				653	6170;7918	True;True	6508;8341	13476;13477;17277;17278	12659;12660;16143;16144	12660;16143
SPAP8A3.09c|paa1|I|protein	SPAP8A3.09c|paa1|I|protein	4	4	4	>SPAP8A3.09c|paa1|I|protein phosphatase regulatory subunit Paa1	1	4	4	4	2	4	2	4	2	4	9.7	9.7	9.7	66.616	590	590	0	11.597	By MS/MS	By MS/MS	4.2	9.7	29951000	8756800	21194000	14677000	14685000	2	3	5				654	2278;4255;5238;6288	True;True;True;True	2387;4455;5480;6633	4712;4713;9031;10971;13720;13721	4377;4378;8326;10127;12882	4377;8326;10127;12882
SPAP8A3.12c|tpp2|I|tripeptidyl-peptidase	SPAP8A3.12c|tpp2|I|tripeptidyl-peptidase	2	2	2	>SPAP8A3.12c|tpp2|I|tripeptidyl-peptidase II Tpp2	1	2	2	2	2	1	2	1	2	1	1.5	1.5	1.5	142.92	1274	1274	0	5.3719	By MS/MS	By MS/MS	1.5	0.5	6685400	4604700	2080700	4295000	0	2	1	3				655	446;4379	True;True	466;4588	996;997;9269	919;920;8549	919;8549
SPAPB17E12.11|ost3|I|oligosaccharyltransferase	SPAPB17E12.11|ost3|I|oligosaccharyltransferase	1	1	1	>SPAPB17E12.11|ost3|I|oligosaccharyltransferase gamma subunit Ost3 (predicted)	1	1	1	1	1	0	1	0	1	0	2.3	2.3	2.3	34.983	309	309	0.0015613	1.829	By MS/MS	By matching	2.3	0	13224000	13224000	0	12335000	0	1	0	1				656	4619	TRUE	4839	9771	9022	9022
SPAPB17E12.13|rpl1802|I|60S	SPAPB17E12.13|rpl1802|I|60S	4	4	2	>SPAPB17E12.13|rpl1802|I|60S ribosomal protein L18 (predicted)	1	4	4	2	4	3	4	3	2	1	22.5	22.5	10.7	21.184	187	187	0	9.6889	By MS/MS	By MS/MS	22.5	15.5	44880000	21330000	23550000	15681000	27764000	3	4	7				657	214;2925;5242;7978	True;True;True;True	226;3054;5484;8407	507;508;6137;6138;10977;10978;10979;17408	469;470;5685;5686;10133;10134;16266	469;5685;10133;16266
SPAPB17E12.14c|SPAPB17E12.14c|I|6-phosphofructo-2-kinase/fructose-2,6-bisphosphate	SPAPB17E12.14c|SPAPB17E12.14c|I|6-phosphofructo-2-kinase/fructose-2,6-bisphosphate	8	8	8	>SPAPB17E12.14c|SPAPB17E12.14c|I|6-phosphofructo-2-kinase/fructose-2,6-bisphosphate 2-phosphatase (predicted)	1	8	8	8	7	7	7	7	7	7	15.1	15.1	15.1	76.392	668	668	0	40.864	By MS/MS	By MS/MS	13.6	13.3	86317000	35406000	50912000	34688000	49247000	7	6	13				658	3388;3473;4256;5362;6242;8732;9240;9366	True;True;True;True;True;True;True;True	3536;3626;4456;5605;6585;9197;9726;9856	7114;7302;7303;9032;9033;11205;11206;13623;13624;18997;18998;20122;20123;20402	6593;6761;6762;8327;8328;10341;10342;12796;12797;17742;17743;18881;19154	6593;6761;8328;10341;12796;17742;18881;19154
SPAPB1A10.12c|alo1|I|D-arabinono-1,4-lactone	SPAPB1A10.12c|alo1|I|D-arabinono-1,4-lactone	3	3	3	>SPAPB1A10.12c|alo1|I|D-arabinono-1,4-lactone oxidase (predicted)	1	3	3	3	2	3	2	3	2	3	8	8	8	52.027	461	461	0	5.5152	By MS/MS	By MS/MS	4.6	8	21636000	7757200	13879000	0	13879000	1	2	3				659	5909;8205;8318	True;True;True	6228;8645;8764	12863;12864;17920;18159;18160;18161	12088;16754;16976;16977;16978	12088;16754;16976
SPAPB1A10.16|SPAPB1A10.16|I|conserved	SPAPB1A10.16|SPAPB1A10.16|I|conserved	5	5	5	>SPAPB1A10.16|SPAPB1A10.16|I|conserved fungal protein	1	5	5	5	5	2	5	2	5	2	39.2	39.2	39.2	16.838	143	143	0	35.239	By MS/MS	By MS/MS	39.2	19.6	48219000	30225000	17994000	24838000	21348000	6	2	8				660	5599;6319;6320;6854;9078	True;True;True;True;True	5894;6666;6667;7228;9557	12007;13798;13799;13800;14968;19790;19791	11140;11141;12956;12957;12958;14031;18573;18574	11141;12956;12957;14031;18573	276	63
SPAPB1E7.05|gde1|I|glycerophosphoryl	SPAPB1E7.05|gde1|I|glycerophosphoryl	2	2	2	>SPAPB1E7.05|gde1|I|glycerophosphoryl diester phosphodiesterase Gde1 (predicted)	1	2	2	2	1	2	1	2	1	2	2.6	2.6	2.6	118.13	1076	1076	0	3.8439	By MS/MS	By MS/MS	0.9	2.6	8704400	3048600	5655800	0	5655800	1	1	2				661	3887;7896	True;True	4066;8318	8213;8214;17240	7598;16107	7598;16107
SPAPB1E7.07|glt1|I|glutamate	SPAPB1E7.07|glt1|I|glutamate	58	58	58	>SPAPB1E7.07|glt1|I|glutamate synthase Glt1 (predicted)	1	58	58	58	52	51	52	51	52	51	39.3	39.3	39.3	232.85	2111	2111	0	321.01	By MS/MS	By MS/MS	34.4	35.4	1902100000	987440000	914650000	843130000	952240000	59	60	119				662	79;96;152;179;220;312;783;819;830;1111;1399;1650;1938;1965;2224;2697;2703;2809;3245;3364;3585;3652;3984;4199;4530;4606;4646;4755;4814;4926;5406;5524;5560;5579;5731;5838;5976;5978;6329;6408;6751;6844;7036;7060;7400;7439;7440;7588;8096;8120;8149;8182;8577;8769;8824;8868;8974;9070	True;True;True;True;True;True;True;True;True;True;True;True;True;True;True;True;True;True;True;True;True;True;True;True;True;True;True;True;True;True;True;True;True;True;True;True;True;True;True;True;True;True;True;True;True;True;True;True;True;True;True;True;True;True;True;True;True;True	80;101;161;188;189;232;327;820;856;867;1165;1473;1738;2036;2064;2332;2817;2823;2936;3387;3512;3743;3817;3818;4167;4397;4747;4826;4866;4975;5036;5037;5151;5650;5787;5837;5866;5867;6044;6153;6301;6303;6304;6676;6761;7122;7217;7415;7440;7794;7834;7835;7990;8529;8555;8584;8622;9039;9236;9292;9339;9449;9548	156;157;207;208;389;390;440;441;442;517;518;519;520;701;1686;1687;1763;1764;1781;1782;2363;2364;2911;2912;3403;3404;3955;3956;3957;3958;4022;4581;4582;5636;5637;5648;5883;5884;5885;5886;6843;7074;7553;7554;7693;7694;7695;7696;8427;8428;8929;8930;9598;9599;9751;9820;9821;10020;10021;10124;10125;10126;10339;10340;11332;11333;11697;11796;11797;11946;11947;11948;11949;11950;11951;12497;12718;12719;13…	135;181;182;359;360;410;411;412;479;480;481;482;645;1549;1550;1618;1632;1633;2178;2179;2690;2691;3154;3155;3676;3677;3678;3737;4241;4242;5222;5223;5232;5448;5449;5450;5451;6350;6558;6986;6987;7113;7114;7115;7116;7789;7790;8230;8231;8862;8863;9006;9070;9071;9257;9356;9357;9358;9551;9552;10462;10463;10837;10925;10926;11083;11084;11085;11086;11087;11088;11751;11953;11954;11955;11956;12247;12251;1225…	135;181;359;411;482;645;1549;1618;1632;2179;2691;3155;3678;3737;4242;5222;5232;5448;6350;6558;6987;7114;7789;8231;8862;9006;9071;9257;9358;9552;10462;10837;10926;11083;11751;11953;12247;12251;12971;13145;13838;14007;14393;14434;15060;15128;15129;15380;16498;16548;16648;16722;17453;17819;17910;18007;18204;18556	277;278;279;280;281	96;624;1460;1501;1578
SPAPB1E7.09|ogm2|I|protein	SPAPB1E7.09|ogm2|I|protein	17	17	17	>SPAPB1E7.09|ogm2|I|protein O-mannosyltransferase Ogm2	1	17	17	17	15	12	15	12	15	12	27.6	27.6	27.6	85.036	739	739	0	53.071	By MS/MS	By MS/MS	26.3	21.5	481670000	253720000	227940000	210030000	254570000	20	12	32				663	539;3096;3097;3183;3660;4394;4634;5039;5561;5933;5946;6669;6741;6867;7220;7438;8911	True;True;True;True;True;True;True;True;True;True;True;True;True;True;True;True;True	560;3233;3234;3322;3826;4603;4854;5276;5838;6254;6267;7030;7112;7241;7607;7832;7833;9383	1175;1176;6544;6545;6713;6714;7715;7716;9293;9796;9797;10579;10580;11798;12917;12940;12941;12942;12943;12944;14567;14738;14739;14740;14741;14992;14993;15734;16175;16176;16177;16178;19365;19366	1077;1078;6067;6068;6226;6227;7137;7138;8572;9048;9049;9774;9775;10927;12137;12162;12163;12164;12165;12166;13653;13819;13820;13821;13822;14052;14734;15125;15126;15127;18083;18084	1078;6067;6068;6227;7137;8572;9048;9775;10927;12137;12165;13653;13821;14052;14734;15126;18083	282;283	315;336
SPAPB21F2.02|dop1|I|Dopey	SPAPB21F2.02|dop1|I|Dopey	3	3	3	>SPAPB21F2.02|dop1|I|Dopey family protein Dop1	1	3	3	3	2	2	2	2	2	2	2	2	2	192.65	1687	1687	0	2.2077	By MS/MS	By MS/MS	1.4	1.5	10064000	4811200	5253100	0	5253100	2	2	4				664	936;3610;7717	True;True;True	984;3770;8130	2013;2014;7605;16811	1854;1855;7034;15716	1854;7034;15716
SPAPB8E5.03|mae1|I|malic	SPAPB8E5.03|mae1|I|malic	2	2	2	>SPAPB8E5.03|mae1|I|malic acid transport protein Mae1	1	2	2	2	2	2	2	2	2	2	4.1	4.1	4.1	49.304	438	438	0	8.6349	By MS/MS	By MS/MS	4.1	4.1	54606000	18857000	35749000	24797000	28540000	2	3	5				665	1928;9099	True;True	2025;9580	3933;3934;19839;19840;19841	3655;3656;18620;18621;18622	3655;18620
SPAPB8E5.07c|rrp12|I|rRNA	SPAPB8E5.07c|rrp12|I|rRNA	3	3	3	>SPAPB8E5.07c|rrp12|I|rRNA processing protein Rrp12 (predicted)	1	3	3	3	3	2	3	2	3	2	2	2	2	130.53	1163	1163	0	3.5606	By MS/MS	By MS/MS	2	1.3	23981000	12725000	11256000	13039000	10086000	3	1	4				666	786;4791;9291	True;True;True	823;5012;9780	1692;1693;10083;10084;20246	1554;9315;9316;19003	1554;9315;19003
SPAPB8E5.09|rvb1|I|AAA	SPAPB8E5.09|rvb1|I|AAA	7	7	7	>SPAPB8E5.09|rvb1|I|AAA family ATPase Rvb1	1	7	7	7	7	5	7	5	7	5	20.4	20.4	20.4	50.052	456	456	0	26.395	By MS/MS	By MS/MS	20.4	14	147430000	86770000	60659000	63705000	77889000	8	6	14				667	1292;2743;4374;7491;7701;7777;9327	True;True;True;True;True;True;True	1361;2866;4582;7888;8112;8191;9817	2714;2715;5737;5738;9260;9261;16279;16280;16281;16282;16754;16755;16756;16757;16937;20321	2499;2500;5313;5314;8542;15219;15220;15221;15222;15660;15661;15662;15663;15832;19071	2500;5313;8542;15219;15660;15832;19071
SPAPJ696.01c|vps17|I|retromer	SPAPJ696.01c|vps17|I|retromer	9	9	9	>SPAPJ696.01c|vps17|I|retromer complex subunit Vps17	1	9	9	9	8	7	8	7	8	7	24.2	24.2	24.2	60.92	549	549	0	50.72	By MS/MS	By MS/MS	18.4	19.3	205490000	123740000	81752000	101230000	95941000	7	5	12				668	3843;4884;4890;5771;5961;6425;7353;7523;7941	True;True;True;True;True;True;True;True;True	4020;5109;5115;6086;6283;6778;7745;7922;8367	8125;10262;10263;10272;10273;12589;12590;12977;12978;14028;16009;16010;16344;17326;17327	7515;9480;9481;9491;9492;11833;11834;12196;13168;14973;14974;15276;16189	7515;9481;9492;11834;12196;13168;14973;15276;16189
SPAPJ696.02|lsb4|I|actin	SPAPJ696.02|lsb4|I|actin	5	5	5	>SPAPJ696.02|lsb4|I|actin cortical patch component Lsb4 (predicted)	1	5	5	5	5	3	5	3	5	3	12.6	12.6	12.6	46.373	430	430	0	8.3358	By MS/MS	By MS/MS	12.6	7.9	49168000	28003000	21165000	22224000	25060000	4	3	7				669	212;2378;3599;4889;6870	True;True;True;True;True	224;2491;3757;5114;7244	503;504;4902;7582;7583;10270;10271;14997	467;4544;7012;7013;9488;9489;9490;14055	467;4544;7012;9489;14055
SPAPJ698.02c|rps002|I|40S	SPAPJ698.02c|rps002|I|40S	8	8	6	>SPAPJ698.02c|rps002|I|40S ribosomal protein S0B	1	8	8	6	8	6	8	6	6	4	36.6	36.6	27.9	31.42	287	287	0	39.201	By MS/MS	By MS/MS	36.6	32.8	230590000	119370000	111230000	101610000	120950000	7	7	14				670	1804;2250;4645;5853;6157;6712;6924;7946	True;True;True;True;True;True;True;True	1895;2358;4865;6168;6495;7076;7301;8372	3676;3677;3678;4660;4661;9818;9819;12753;13450;13451;14663;14664;15122;17335;17336	3401;3402;4329;4330;9067;9068;9069;11987;12639;12640;13746;14166;16194;16195	3402;4330;9067;11987;12639;13746;14166;16194
SPAPJ698.03c|prp12|I|U2	SPAPJ698.03c|prp12|I|U2	2	2	2	>SPAPJ698.03c|prp12|I|U2 snRNP-associated protein Sap130	1	2	2	2	1	2	1	2	1	2	2.9	2.9	2.9	134.97	1206	1206	0	4.0939	By MS/MS	By MS/MS	1.2	2.9	11557000	3846800	7710500	0	7710500	0	1	1				671	2312;7996	True;True	2421;8425	4771;17443;17444	4427;16299	4427;16299
SPAPYUG7.05|SPAPYUG7.05|I|delta-1-pyrroline-5-carboxylate	SPAPYUG7.05|SPAPYUG7.05|I|delta-1-pyrroline-5-carboxylate	2	2	2	>SPAPYUG7.05|SPAPYUG7.05|I|delta-1-pyrroline-5-carboxylate reductase (predicted)	1	2	2	2	2	2	2	2	2	2	7.1	7.1	7.1	29.875	282	282	0	3.2634	By MS/MS	By MS/MS	7.1	7.1	21055000	9778600	11277000	0	11277000	1	1	2				672	1814;4661	True;True	1906;4881	3698;3699;9851;9852	3419;3420;9102;9103	3419;9103
SPAPYUK71.03c|syn1|I|synaptotagmin	SPAPYUK71.03c|syn1|I|synaptotagmin	3	3	3	>SPAPYUK71.03c|syn1|I|synaptotagmin family C2 domain protein, Syn1	1	3	3	3	2	2	2	2	2	2	3.2	3.2	3.2	135.78	1225	1225	0	9.4172	By MS/MS	By MS/MS	2	2.4	21003000	10775000	10229000	0	10229000	1	1	2				673	1596;4240;7627	True;True;True	1681;4439;8032	3306;9008;9009;16563	3059;8307;15484	3059;8307;15484
SPBC106.03|SPBC106.03|II|DUF1776	SPBC106.03|SPBC106.03|II|DUF1776	4	4	4	>SPBC106.03|SPBC106.03|II|DUF1776 family protein	1	4	4	4	4	4	4	4	4	4	14	14	14	40.006	357	357	0	8.8938	By MS/MS	By MS/MS	14	14	83749000	54733000	29016000	40022000	40046000	4	4	8				674	2057;4542;7144;8851	True;True;True;True	2157;4761;7526;9321	4247;4248;9621;9622;15576;15577;19239;19240	3946;3947;8883;8884;14583;14584;17971;17972	3946;8883;14584;17972
SPBC106.04|ada1|II|adenosine	SPBC106.04|ada1|II|adenosine	28	28	28	>SPBC106.04|ada1|II|adenosine deaminase Ada1	1	28	28	28	27	21	27	21	27	21	40.4	40.4	40.4	95.886	831	831	0	235.11	By MS/MS	By MS/MS	40.3	30.7	1235600000	633060000	602530000	509380000	683630000	36	24	60				675	496;1422;1647;1747;2089;2602;3078;4142;4157;4206;4595;4838;5162;5206;5930;5968;6005;6049;6050;6857;8337;8904;8906;8916;9018;9157;9259;9339	True;True;True;True;True;True;True;True;True;True;True;True;True;True;True;True;True;True;True;True;True;True;True;True;True;True;True;True	517;1498;1735;1838;2190;2719;3215;4335;4351;4404;4815;5062;5403;5447;6251;6293;6332;6376;6377;7231;8784;9376;9378;9388;9494;9641;9747;9829	1100;1101;2949;3397;3398;3399;3400;3571;4312;4313;5439;5440;5441;5442;6504;6505;6506;6507;8799;8833;8834;8835;8836;8941;8942;9731;9732;10172;10173;10830;10903;10904;10905;10906;10907;12912;12913;13011;13012;13083;13171;13172;13173;13174;13175;13176;14972;14973;14974;14975;18201;18202;19353;19354;19357;19358;19374;19375;19599;19962;19963;20166;20348;20349;20350	1010;1011;2726;3148;3149;3150;3151;3310;4005;4006;5051;5052;5053;5054;6033;6034;8115;8144;8145;8146;8241;8242;8987;8988;9399;9400;9995;10065;10066;10067;10068;10069;12133;12227;12228;12229;12295;12367;12368;12369;12370;12371;12372;14035;14036;14037;14038;17016;17017;18072;18073;18076;18077;18092;18289;18738;18927;19108;19109;19110	1011;2726;3150;3310;4006;5051;6033;8115;8145;8242;8988;9400;9995;10068;12133;12227;12295;12368;12369;14035;17017;18072;18076;18092;18289;18738;18927;19109
SPBC106.06|cct4|II|chaperonin-containing	SPBC106.06|cct4|II|chaperonin-containing	21	21	21	>SPBC106.06|cct4|II|chaperonin-containing T-complex delta subunit Cct4	1	21	21	21	21	14	21	14	21	14	54.1	54.1	54.1	56.968	527	527	0	96.757	By MS/MS	By MS/MS	54.1	34.5	387770000	267020000	120750000	187150000	182660000	22	13	35				676	18;54;186;425;531;901;1617;2361;2401;2518;3036;3255;3891;3944;4058;4515;4517;5217;6495;7022;8125	True;True;True;True;True;True;True;True;True;True;True;True;True;True;True;True;True;True;True;True;True	18;55;197;443;552;946;1704;2472;2514;2634;3172;3397;4070;4123;4246;4731;4733;5458;6850;7401;8560	40;114;115;454;455;942;943;1162;1947;1948;1949;1950;3345;3346;4868;4955;4956;5260;5261;5262;6390;6391;6860;8219;8331;8332;8617;8618;9565;9566;9569;9570;10930;10931;14198;14199;15333;15334;17720	37;99;100;423;866;867;868;1067;1793;1794;1795;1796;3096;3097;4511;4599;4888;4889;4890;5917;5918;6365;7603;7705;7958;7959;8831;8832;8835;8836;10091;10092;13336;14363;14364;16555	37;100;423;867;1067;1795;3096;4511;4599;4888;5917;6365;7603;7705;7958;8831;8835;10092;13336;14364;16555
SPBC106.09|cut4|II|anaphase-promoting	SPBC106.09|cut4|II|anaphase-promoting	1	1	1	>SPBC106.09|cut4|II|anaphase-promoting complex, platform subcomplex scaffold subunit Apc1	1	1	1	1	1	1	1	1	1	1	0.5	0.5	0.5	165.41	1458	1458	0.0098108	1.103	By MS/MS	By matching	0.5	0.5	17560000	10946000	6614500	0	6614500	1	0	1				677	8688	TRUE	9153	18906;18907	17663	17663
SPBC106.10|pka1|II|cAMP-dependent	SPBC106.10|pka1|II|cAMP-dependent	3	3	3	>SPBC106.10|pka1|II|cAMP-dependent protein kinase catalytic subunit Pka1	1	3	3	3	2	2	2	2	2	2	8.2	8.2	8.2	57.577	512	512	0	8.1609	By MS/MS	By MS/MS	6.2	4.1	11101000	7064200	4036900	6589100	0	2	3	5				678	1088;8314;8558	True;True;True	1141;8760;9020	2315;2316;18150;18151;18656	2138;2139;16968;16969;17430	2138;16968;17430
SPBC106.11c|plg7|II|phospholipase	SPBC106.11c|plg7|II|phospholipase	1	1	1	>SPBC106.11c|plg7|II|phospholipase A2, PAF family homolog	1	1	1	1	1	1	1	1	1	1	3.2	3.2	3.2	49.846	438	438	0	3.0202	By MS/MS	By matching	3.2	3.2	6796900	4584000	2212900	0	2212900	1	0	1				679	5081	TRUE	5319	10662;10663	9847	9847
SPBC106.13|gid9|II|GID	SPBC106.13|gid9|II|GID	3	3	3	>SPBC106.13|gid9|II|GID complex subunit Gid9 (predicted)	1	3	3	3	3	2	3	2	3	2	8.7	8.7	8.7	45.857	404	404	0	7.9256	By MS/MS	By MS/MS	8.7	6.7	30784000	19093000	11691000	0	11691000	2	2	4				680	254;1406;9258	True;True;True	267;1480;9746	585;586;587;2922;20164;20165	541;542;543;2701;18925;18926	543;2701;18926
SPBC106.16|pre6|II|20S	SPBC106.16|pre6|II|20S	3	3	3	>SPBC106.16|pre6|II|20S proteasome complex subunit alpha 4 Pre6	1	3	3	3	2	1	2	1	2	1	18.5	18.5	18.5	28.277	259	259	0	11.572	By MS/MS	By MS/MS	14.7	3.9	20149000	14524000	5625100	13547000	0	2	0	2				681	490;2635;9306	True;True;True	511;2753;9795	1091;5509;20275	1002;5115;19030	1002;5115;19030
SPBC106.17c|cys2|II|homoserine	SPBC106.17c|cys2|II|homoserine	11	11	11	>SPBC106.17c|cys2|II|homoserine O-acetyltransferase (predicted)	1	11	11	11	9	7	9	7	9	7	24	24	24	56.362	504	504	0	22.134	By MS/MS	By MS/MS	20	14.7	157780000	72742000	85040000	45919000	95314000	7	7	14				682	558;596;597;1885;2131;2327;4964;4965;6287;6866;6901	True;True;True;True;True;True;True;True;True;True;True	581;620;621;1978;2234;2235;2437;5197;5198;6632;7240;7277	1218;1288;1289;1290;1291;1292;3847;3848;4389;4390;4391;4392;4802;10438;10439;13718;13719;14991;15073;15074	1118;1180;1181;1182;1183;1184;3562;3563;4069;4070;4071;4072;4454;9644;9645;12881;14051;14121;14122	1118;1181;1184;3563;4071;4454;9644;9645;12881;14051;14121	284	198
SPBC4F6.04|rpl2502|II|60S;SPBC106.18|rpl2501|II|60S	SPBC4F6.04|rpl2502|II|60S;SPBC106.18|rpl2501|II|60S	2;2	2;2	2;2	>SPBC4F6.04|rpl2502|II|60S ribosomal protein L25 (predicted);>SPBC106.18|rpl2501|II|60S ribosomal protein L25 (predicted)	2	2	2	2	1	2	1	2	1	2	17	17	17	15.767	141	141;141	0	4.0323	By matching	By MS/MS	7.8	17	5512600	531740	4980900	0	4980900	0	2	2				683	3496;3653	True;True	3650;3819	7360;7697;7698	6812;7117	6812;7117
SPBC1105.02c|lys4|II|homocitrate	SPBC1105.02c|lys4|II|homocitrate	15	15	15	>SPBC1105.02c|lys4|II|homocitrate synthase	1	15	15	15	15	10	15	10	15	10	46.4	46.4	46.4	46.292	418	418	0	66.668	By MS/MS	By MS/MS	46.4	35.2	396440000	206410000	190020000	166770000	215790000	15	11	26				684	313;383;1146;1423;1424;1783;2216;5280;5737;6487;6725;7214;8130;8278;8546	True;True;True;True;True;True;True;True;True;True;True;True;True;True;True	328;400;1207;1499;1500;1874;2324;5523;6050;6842;7093;7601;8565;8722;9008	702;703;849;850;2445;2446;2950;2951;3635;4568;11048;11049;12506;12507;14185;14186;14699;14700;15718;15719;17766;17767;17768;17769;18065;18628;18629	646;647;648;781;2253;2254;2727;2728;3365;4229;10193;10194;11758;11759;13324;13325;13783;13784;14720;14721;16612;16613;16614;16615;16888;17402;17403;17404	646;781;2254;2727;2728;3365;4229;10194;11759;13324;13784;14721;16613;16888;17403
SPBC1105.07c|pci2|II|TREX	SPBC1105.07c|pci2|II|TREX	1	1	1	>SPBC1105.07c|pci2|II|TREX complex subunit Pci2 (predicted)	1	1	1	1	1	1	1	1	1	1	3.6	3.6	3.6	50.836	442	442	0.0058997	1.4305	By matching	By MS/MS	3.6	3.6	6248800	3019100	3229700	0	3229700	0	1	1				685	7046	TRUE	7425	15379;15380	14407	14407
SPBC1105.08|emp70|II|EMP70	SPBC1105.08|emp70|II|EMP70	1	1	1	>SPBC1105.08|emp70|II|EMP70 family endosomal transport protein Emp70	1	1	1	1	0	1	0	1	0	1	1.7	1.7	1.7	71.13	629	629	0.009233	1.1863	By matching	By MS/MS	0	1.7	1181800	0	1181800	0	1181800	0	1	1				686	8759	TRUE	9225	19052	17795	17795
SPBC115.02c|afg1|II|AFG1	SPBC115.02c|afg1|II|AFG1	1	1	1	>SPBC115.02c|afg1|II|AFG1 family mitochondrial ATPase Afg1 (predicted)	1	1	1	1	1	1	1	1	1	1	3.1	3.1	3.1	51.552	454	454	0	2.2523	By MS/MS	By MS/MS	3.1	3.1	10051000	3540700	6510500	0	6510500	1	1	2				687	2004	TRUE	2104	4147;4148	3856;3857	3857
SPBC119.01|rpn3|II|19S	SPBC119.01|rpn3|II|19S	6	6	6	>SPBC119.01|rpn3|II|19S proteasome regulatory subunit Rpn3	1	6	6	6	6	4	6	4	6	4	15.3	15.3	15.3	57.346	497	497	0	14.366	By MS/MS	By MS/MS	15.3	9.7	50278000	25066000	25212000	17973000	30619000	4	3	7				688	337;3378;4532;5538;6023;7911	True;True;True;True;True;True	353;3526;4749;5807;6350;8334	749;750;7098;9601;11742;11743;13122;13123;17268;17269	690;691;6578;8865;10875;10876;12326;16135;16136	690;6578;8865;10875;12326;16135
SPBC119.02|ubc4|II|ubiquitin	SPBC119.02|ubc4|II|ubiquitin	3	3	3	>SPBC119.02|ubc4|II|ubiquitin conjugating enzyme E2 Ubc4/UbcP1	1	3	3	3	3	2	3	2	3	2	38.1	38.1	38.1	16.476	147	147	0	7.6695	By MS/MS	By MS/MS	38.1	19.7	71595000	42839000	28756000	39116000	29598000	3	1	4				689	1180;3928;8459	True;True;True	1242;4107;8916	2516;2517;8296;8297;18459	2321;2322;7673;17247	2321;7673;17247
SPBC119.07|ppk19|II|serine/threonine	SPBC119.07|ppk19|II|serine/threonine	2	2	2	>SPBC119.07|ppk19|II|serine/threonine protein kinase Ppk19	1	2	2	2	2	2	2	2	2	2	0.9	0.9	0.9	191.09	1706	1706	0.0030488	1.643	By MS/MS	By MS/MS	0.9	0.9	33853000	15924000	17929000	0	17929000	1	1	2				690	2064;5207	True;True	2164;5448	4260;4261;10908;10909	3958;3959;10070;10071	3959;10071
SPBC119.08|pmk1|II|MAP	SPBC119.08|pmk1|II|MAP	6	6	5	>SPBC119.08|pmk1|II|MAP kinase Pmk1	1	6	6	5	5	6	5	6	4	5	14.5	14.5	12.6	48.261	422	422	0	17.406	By MS/MS	By MS/MS	11.4	14.5	108020000	57540000	50477000	54736000	49410000	5	6	11				691	543;3236;4733;8242;8350;9128	True;True;True;True;True;True	564;3378;4953;8684;8799;9611	1184;1185;6824;6825;9980;9981;18000;18226;18227;19899;19900;19901;19902	1085;1086;6333;6334;9219;9220;16830;17039;18675;18676;18677;18678	1085;6334;9220;16830;17039;18675
SPBC119.09c|SPBC119.09c|II|ORMDL	SPBC119.09c|SPBC119.09c|II|ORMDL	1	1	1	>SPBC119.09c|SPBC119.09c|II|ORMDL family protein (predicted)	1	1	1	1	1	1	1	1	1	1	5.9	5.9	5.9	21.467	186	186	0	2.6291	By MS/MS	By MS/MS	5.9	5.9	2201300	2201300	0	2053300	0	1	1	2				692	4623	TRUE	4843	9776;9777	9026;9027	9027
SPBC119.10|asn1|II|asparagine	SPBC119.10|asn1|II|asparagine	36	36	36	>SPBC119.10|asn1|II|asparagine synthetase	1	36	36	36	33	30	33	30	33	30	75.8	75.8	75.8	63.24	557	557	0	262.25	By MS/MS	By MS/MS	74.1	68.8	3999400000	1804200000	2195200000	1652900000	2118300000	39	37	76				693	144;154;423;653;823;1165;1212;1244;1301;1721;1778;3441;3679;3943;4053;4154;4260;4261;4431;4589;4933;5385;5617;5845;6313;6519;7334;7703;8054;8067;8404;8566;8567;9055;9056;9251	True;True;True;True;True;True;True;True;True;True;True;True;True;True;True;True;True;True;True;True;True;True;True;True;True;True;True;True;True;True;True;True;True;True;True;True	153;163;441;680;681;860;1226;1275;1310;1371;1810;1869;3593;3845;4122;4240;4348;4460;4461;4643;4809;5158;5628;5919;6160;6660;6876;7725;8114;8486;8499;8858;9028;9029;9532;9533;9739	374;393;394;395;396;936;937;1408;1409;1410;1411;1768;1769;2481;2482;2568;2625;2626;2732;2733;3521;3522;3625;7237;7238;7239;7752;8329;8330;8597;8598;8599;8600;8828;8829;9039;9040;9041;9042;9043;9044;9391;9392;9717;9718;9719;9720;10352;10353;10354;11273;12053;12054;12730;12731;12732;12733;13782;13783;14259;15968;15969;16760;16761;16762;16763;17566;17567;17568;17569;17595;17596;17597;17598;18358;186…	345;363;364;365;366;862;1287;1288;1289;1290;1622;2288;2289;2290;2365;2366;2418;2419;2420;2515;3263;3356;6699;6700;6701;7171;7703;7704;7940;7941;7942;7943;8140;8333;8334;8335;8336;8337;8338;8339;8673;8974;8975;8976;8977;9564;9565;9566;10404;11184;11185;11965;11966;11967;11968;12940;12941;13389;14935;14936;15665;15666;15667;16414;16415;16416;16417;16441;16442;16443;17157;17440;17441;17442;18534;185…	345;363;862;1290;1622;2290;2366;2420;2515;3263;3356;6701;7171;7704;7940;8140;8334;8339;8673;8975;9565;10404;11185;11968;12940;13389;14936;15667;16414;16442;17157;17441;17442;18534;18535;18915	285;286;287;288	227;337;401;429
SPBC119.17|cym1|II|mitochondrial	SPBC119.17|cym1|II|mitochondrial	3	3	3	>SPBC119.17|cym1|II|mitochondrial metalloendopeptidase (predicted)	1	3	3	3	1	2	1	2	1	2	2.6	2.6	2.6	111.4	992	992	0	3.4346	By MS/MS	By MS/MS	0.7	1.9	11754000	6185700	5568300	0	5568300	1	2	3				694	196;4897;5348	True;True;True	208;5122;5591	475;10283;11185	442;9503;10321	442;9503;10321
SPBC1198.02|dea2|II|adenine	SPBC1198.02|dea2|II|adenine	5	5	5	>SPBC1198.02|dea2|II|adenine deaminase Dea2	1	5	5	5	5	4	5	4	5	4	16.9	16.9	16.9	41.198	367	367	0	27.334	By MS/MS	By MS/MS	16.9	13.1	85511000	48957000	36554000	48759000	33459000	5	4	9				695	847;3031;6859;7125;7617	True;True;True;True;True	885;3167;7233;7507;8022	1808;1809;6378;6379;6380;14977;14978;15542;15543;16543	1659;5907;5908;5909;14040;14041;14551;14552;15467	1659;5908;14041;14552;15467
SPBC1198.08|dug1|II|dipeptidase	SPBC1198.08|dug1|II|dipeptidase	4	4	4	>SPBC1198.08|dug1|II|dipeptidase Dug1 (predicted)	1	4	4	4	3	4	3	4	3	4	15.5	15.5	15.5	52.84	476	476	0	8.0348	By MS/MS	By MS/MS	12.2	15.5	47216000	16907000	30310000	18912000	23508000	2	4	6				696	765;2769;4354;6062	True;True;True;True	802;2895;4561;6390;6391	1654;5805;5806;9227;9228;13203;13204;13205	1520;5374;8513;8514;12399;12400	1520;5374;8514;12399	289	438
SPBC11B10.01|alg2|II|mannosyltransferase	SPBC11B10.01|alg2|II|mannosyltransferase	3	3	3	>SPBC11B10.01|alg2|II|mannosyltransferase complex subunit Alg2 (predicted)	1	3	3	3	3	3	3	3	3	3	7.7	7.7	7.7	57.166	506	506	0	8.2532	By MS/MS	By MS/MS	7.7	7.7	34251000	16134000	18117000	0	18117000	1	1	2				697	3189;4252;5423	True;True;True	3328;4452;5668	6722;6723;9027;9028;11372;11373	6235;6236;8323;10506	6235;8323;10506
SPBC11B10.02c|his3|II|histidinol-phosphate	SPBC11B10.02c|his3|II|histidinol-phosphate	1	1	1	>SPBC11B10.02c|his3|II|histidinol-phosphate aminotransferase imidazole acetol phosphate transaminase His3	1	1	1	1	1	1	1	1	1	1	3.4	3.4	3.4	42.733	384	384	0.00079239	2.0076	By matching	By MS/MS	3.4	3.4	9799600	4237800	5561800	0	5561800	0	1	1				698	4263	TRUE	4463	9047;9048	8342	8342
SPBC11B10.03|cog8|II|Golgi	SPBC11B10.03|cog8|II|Golgi	5	5	5	>SPBC11B10.03|cog8|II|Golgi transport complex subunit Cog8 (predicted)	1	5	5	5	2	5	2	5	2	5	18.8	18.8	18.8	44.08	378	378	0	12.981	By MS/MS	By MS/MS	6.1	18.8	24457000	8994200	15463000	10499000	13354000	2	5	7				699	1958;3539;4659;7199;8297	True;True;True;True;True	2057;3694;4879;7585;8742	4007;7463;9847;9848;15687;15688;18112	3721;6907;9098;9099;14690;14691;16934	3721;6907;9099;14690;16934
SPBC11B10.05c|rsp1|II|random	SPBC11B10.05c|rsp1|II|random	11	11	11	>SPBC11B10.05c|rsp1|II|random septum position protein Rsp1	1	11	11	11	11	9	11	9	11	9	37.2	37.2	37.2	56.288	494	494	0	46.943	By MS/MS	By MS/MS	37.2	27.3	296570000	152920000	143650000	126050000	150840000	10	12	22				700	1298;1441;1693;2009;4763;5140;5744;5880;7198;7925;8474	True;True;True;True;True;True;True;True;True;True;True	1368;1520;1521;1781;2109;4983;5380;6058;6195;6196;7584;8349;8931	2725;2726;2727;2728;2993;2994;2995;2996;3473;3474;3475;4156;10034;10035;10781;10782;12523;12802;12803;12804;12805;15685;15686;17291;17292;18485;18486	2509;2510;2511;2770;2771;2772;3218;3219;3865;9269;9270;9951;9952;11774;12034;12035;12036;14687;14688;14689;16157;17270;17271	2511;2771;3219;3865;9269;9952;11774;12036;14687;16157;17270	290;291	413;473
SPBC11B10.09|cdc2|II|cyclin-dependent	SPBC11B10.09|cdc2|II|cyclin-dependent	5	4	4	>SPBC11B10.09|cdc2|II|cyclin-dependent protein kinase Cdk1/Cdc2	1	5	4	4	5	4	4	3	4	3	24.2	21.5	21.5	34.358	297	297	0	10.694	By MS/MS	By MS/MS	24.2	16.2	59617000	38051000	21566000	32810000	24247000	5	2	7				701	3354;4214;4750;6793;8792	True;False;True;True;True	3502;4412;4970;7164;9260	7056;7057;8959;8960;10012;10013;14837;14838;19120	6544;6545;8258;8259;9250;9251;13912;13913;17856;17857	6545;8259;9250;13913;17857
SPBC11B10.10c|pht1|II|histone;SPAC19G12.06c|hta2|I|histone;SPCC622.08c|hta1|III|histone	SPBC11B10.10c|pht1|II|histone;SPAC19G12.06c|hta2|I|histone;SPCC622.08c|hta1|III|histone	2;1;1	2;1;1	2;1;1	>SPBC11B10.10c|pht1|II|histone H2A variant H2A.Z, Pht1;>SPAC19G12.06c|hta2|I|histone H2A beta;>SPCC622.08c|hta1|III|histone H2A alpha	3	2	2	2	2	2	2	2	2	2	11.5	11.5	11.5	15.025	139	139;131;132	0	3.3351	By MS/MS	By MS/MS	11.5	11.5	38647000	19846000	18801000	0	18801000	1	1	2				702	226;3034	True;True	238;3170	531;532;6385;6386	494;495;5913	495;5913
SPBC11C11.03|ndc80|II|NMS	SPBC11C11.03|ndc80|II|NMS	3	3	3	>SPBC11C11.03|ndc80|II|NMS complex subunit Ndc80	1	3	3	3	3	2	3	2	3	2	4.3	4.3	4.3	71.858	624	624	0	4.1253	By MS/MS	By matching	4.3	3	14928000	10634000	4294700	9918400	0	2	0	2				703	3392;8427;8635	True;True;True	3540;8883;9099	7120;7121;18397;18802;18803	6599;17196;17565	6599;17196;17565
SPBC11C11.06c|SPBC11C11.06c|II|Schizosaccharomyces	SPBC11C11.06c|SPBC11C11.06c|II|Schizosaccharomyces	2	2	2	>SPBC11C11.06c|SPBC11C11.06c|II|Schizosaccharomyces specific protein	1	2	2	2	2	1	2	1	2	1	19.7	19.7	19.7	19.126	178	178	0	7.9146	By MS/MS	By matching	19.7	7.3	16988000	16597000	391060	15481000	0	2	0	2				704	1442;8803	True;True	1522;9271	2997;2998;19143	2773;17877	2773;17877
SPBC1215.01|shy1|II|cytochrome	SPBC1215.01|shy1|II|cytochrome	1	1	1	>SPBC1215.01|shy1|II|cytochrome c oxidase assembly protein Shy1 (predicted)	1	1	1	1	1	0	1	0	1	0	3.4	3.4	3.4	33.38	290	290	0.0037965	1.6113	By MS/MS	By matching	3.4	0	2766400	2766400	0	2580300	0	1	0	1				705	2685	TRUE	2805	5615	5204	5204
SPBC1215.02c|naa25|II|NatB	SPBC1215.02c|naa25|II|NatB	10	10	10	>SPBC1215.02c|naa25|II|NatB N-acetyltransferase complex regulatory subunit Naa25	1	10	10	10	9	9	9	9	9	9	14.5	14.5	14.5	92.456	811	811	0	25.582	By MS/MS	By MS/MS	13.3	13.2	89026000	47108000	41918000	43914000	41943000	8	9	17				706	1705;2268;2545;2664;5397;5438;5461;5855;6178;6293	True;True;True;True;True;True;True;True;True;True	1794;2377;2661;2783;5640;5684;5707;6170;6517;6639	3491;3492;4697;5321;5322;5573;5574;11310;11401;11402;11449;11450;12756;12757;13492;13493;13731;13732	3234;4363;4947;4948;5173;5174;10442;10532;10533;10575;10576;11990;11991;12675;12676;12892;12893	3234;4363;4947;5174;10442;10533;10575;11990;12675;12892
SPBC1271.02|stt3|II|oligosaccharyltransferase	SPBC1271.02|stt3|II|oligosaccharyltransferase	8	8	8	>SPBC1271.02|stt3|II|oligosaccharyltransferase subunit Stt3	1	8	8	8	6	6	6	6	6	6	11.6	11.6	11.6	84.973	752	752	0	18.099	By MS/MS	By MS/MS	8.8	9.3	62424000	35816000	26608000	29351000	30664000	4	6	10				707	1167;1335;2336;3788;5708;5779;6484;7432	True;True;True;True;True;True;True;True	1228;1406;2446;3962;6021;6094;6839;7826	2485;2486;2487;2800;4816;8014;8015;12449;12602;12603;14181;16161;16162	2293;2294;2582;4465;7420;11712;11846;11847;13321;15113	2294;2582;4465;7420;11712;11847;13321;15113
SPBC1271.12|kes1|II|oxysterol	SPBC1271.12|kes1|II|oxysterol	2	2	2	>SPBC1271.12|kes1|II|oxysterol binding protein (predicted)	1	2	2	2	1	2	1	2	1	2	5.7	5.7	5.7	44.591	388	388	0	5.5183	By MS/MS	By MS/MS	3.6	5.7	26400000	12033000	14367000	0	14367000	1	1	2				708	1426;4111	True;True	1502;4302	2954;8727;8728	2731;8059	2731;8059
SPBC1289.03c|spi1|II|Ran	SPBC1289.03c|spi1|II|Ran	4	4	4	>SPBC1289.03c|spi1|II|Ran GTPase Spi1	1	4	4	4	4	2	4	2	4	2	21.8	21.8	21.8	24.555	216	216	0	16.835	By MS/MS	By MS/MS	21.8	12.5	84926000	54130000	30796000	44991000	36294000	3	2	5				709	603;5872;7143;8141	True;True;True;True	627;6187;7525;8576	1302;12790;15574;15575;17789;17790	1191;12022;14581;14582;16632;16633	1191;12022;14581;16633
SPBC1289.04c|pob1|II|Boi	SPBC1289.04c|pob1|II|Boi	2	2	2	>SPBC1289.04c|pob1|II|Boi family protein	1	2	2	2	1	1	1	1	1	1	3.3	3.3	3.3	93.772	871	871	0.00079745	2.0358	By MS/MS	By MS/MS	1.5	1.8	3608500	2251300	1357200	2099900	0	0	1	1				710	5255;6692	True;True	5497;7056	11001;14626	10152;13715	10152;13715
SPBC1289.06c|ppr8|II|mitochondrial	SPBC1289.06c|ppr8|II|mitochondrial	8	8	8	>SPBC1289.06c|ppr8|II|mitochondrial PPR repeat protein Ppr8	1	8	8	8	8	6	8	6	8	6	24.1	24.1	24.1	54.652	481	481	0	30.541	By MS/MS	By MS/MS	24.1	16.8	106960000	60381000	46580000	57666000	45233000	7	3	10				711	666;1402;2619;2655;4438;5297;8434;8978	True;True;True;True;True;True;True;True	694;1476;2736;2773;4650;5540;8890;9453	1442;1443;2915;2916;5475;5476;5555;5556;9405;11080;11081;18408;18409;19508;19509	1321;2694;2695;5086;5087;5157;5158;8685;10221;10222;17206;18208	1321;2695;5087;5158;8685;10222;17206;18208	292	333
SPBC1289.07c|rpc40|II|DNA-directed	SPBC1289.07c|rpc40|II|DNA-directed	3	3	3	>SPBC1289.07c|rpc40|II|DNA-directed RNA polymerase I and III subunit Rpc40	1	3	3	3	3	2	3	2	3	2	10.6	10.6	10.6	39.154	348	348	0	4.0706	By MS/MS	By MS/MS	10.6	8	17534000	8321300	9212800	6949400	10025000	2	2	4				712	2211;4860;7560	True;True;True	2319;5084;7960	4555;4556;10214;10215;16400	4216;9436;9437;15330	4216;9437;15330
SPBC1289.09|tim21|II|TIM23	SPBC1289.09|tim21|II|TIM23	3	3	3	>SPBC1289.09|tim21|II|TIM23 translocase complex subunit Tim21 (predicted)	1	3	3	3	3	3	3	3	3	3	13.5	13.5	13.5	25.568	223	223	0	5.2033	By MS/MS	By MS/MS	13.5	13.5	17603000	7635900	9967500	5776400	11313000	2	3	5				713	409;3474;7643	True;True;True	427;3627;8049	909;910;7304;7305;16590;16591	837;838;6763;6764;15509	837;6763;15509
SPBC1289.11|spf38|II|U5	SPBC1289.11|spf38|II|U5	3	3	3	>SPBC1289.11|spf38|II|U5 snRNP complex subunit Spf38	1	3	3	3	2	3	2	3	2	3	9.4	9.4	9.4	37.427	340	340	0	5.7663	By MS/MS	By MS/MS	6.5	9.4	21897000	9709700	12187000	0	12187000	0	2	2				714	1013;2355;3327	True;True;True	1064;2465;3472	2171;4853;4854;6999;7000	2001;4498;6493	2001;4498;6493
SPBC1289.14|SPBC1289.14|II|adducin	SPBC1289.14|SPBC1289.14|II|adducin	4	4	4	>SPBC1289.14|SPBC1289.14|II|adducin (predicted)	1	4	4	4	4	4	4	4	4	4	19.1	19.1	19.1	35.932	324	324	0	12.092	By MS/MS	By MS/MS	19.1	19.1	65754000	21493000	44260000	18948000	45360000	4	4	8				715	249;4453;6987;8189	True;True;True;True	262;4665;7366;8629	574;575;576;577;9429;9430;15266;15267;17894;17895	531;532;533;534;8707;14300;14301;16730	533;8707;14301;16730
SPBC1289.16c|cao2|II|copper	SPBC1289.16c|cao2|II|copper	22	21	21	>SPBC1289.16c|cao2|II|copper amine oxidase-like protein Cao2	1	22	21	21	22	20	21	19	21	19	38.5	37	37	90.126	794	794	0	106.94	By MS/MS	By MS/MS	38.5	37.2	757260000	358750000	398500000	305690000	427430000	22	23	45				716	9;1433;1767;2883;3059;3648;3740;3828;4005;4583;5117;5274;5275;5646;5799;6295;6949;8026;8320;8896;9129;9341	True;True;True;True;True;True;True;True;True;False;True;True;True;True;True;True;True;True;True;True;True;True	9;1509;1858;3012;3196;3813;3909;4003;4190;4802;5357;5516;5517;5956;6114;6641;7326;8458;8766;9368;9612;9831	17;18;19;20;2969;2970;2971;2972;3605;3606;3607;3608;6050;6051;6052;6053;6462;6463;7686;7687;7888;7889;7890;7891;8090;8091;8476;8477;9707;9708;10734;10735;10736;11034;11035;11036;12288;12289;12638;12639;13734;13735;13736;13737;15179;15180;17511;17512;18163;18164;19341;19903;19904;19905;19906;20353;20354	15;16;17;18;2747;2748;2749;2750;3342;3343;5607;5608;5609;5995;7106;7107;7295;7296;7297;7488;7489;7828;7829;8962;8963;9908;9909;9910;10181;10182;10183;11566;11567;11880;11881;12895;12896;12897;14220;16363;16364;16980;16981;18061;18679;18680;18681;18682;19113;19114	17;2747;3342;5609;5995;7107;7295;7489;7828;8963;9909;10181;10182;11567;11881;12895;14220;16363;16981;18061;18682;19114
SPBC12C2.04|SPBC12C2.04|II|NAD	SPBC12C2.04|SPBC12C2.04|II|NAD	3	3	3	>SPBC12C2.04|SPBC12C2.04|II|NAD binding dehydrogenase family protein	1	3	3	3	3	1	3	1	3	1	9.6	9.6	9.6	43.031	384	384	0	9.1541	By MS/MS	By MS/MS	9.6	3.6	32401000	18765000	13636000	17503000	0	2	1	3				717	5613;7495;8686	True;True;True	5913;7892;9151	12039;16288;18902;18903	11173;15226;17660;17661	11173;15226;17660
SPBC12C2.06|dbp5|II|cytoplasmic	SPBC12C2.06|dbp5|II|cytoplasmic	1	1	1	>SPBC12C2.06|dbp5|II|cytoplasmic ATP-dependent RNA helicase Dbp5 (predicted)	1	1	1	1	1	1	1	1	1	1	2	2	2	56.304	503	503	0	2.3765	By MS/MS	By MS/MS	2	2	9786800	5690900	4095900	0	4095900	1	1	2				718	8503	TRUE	8960	18541;18542	17320;17321	17321
SPBC12C2.07c|srm1|II|spermidine	SPBC12C2.07c|srm1|II|spermidine	3	3	3	>SPBC12C2.07c|srm1|II|spermidine synthase Srm1 (predicted)	1	3	3	3	3	3	3	3	3	3	10.4	10.4	10.4	33.149	298	298	0	6.0651	By MS/MS	By MS/MS	10.4	10.4	42811000	19278000	23534000	18877000	22637000	1	2	3				719	7405;7992;8501	True;True;True	7799;8421;8958	16114;16115;17435;17436;18538;18539	15068;16293;17317;17318	15068;16293;17317
SPBC12C2.11|SPBC12C2.11|II|glutamine-fructose-6-phosphate	SPBC12C2.11|SPBC12C2.11|II|glutamine-fructose-6-phosphate	18	18	18	>SPBC12C2.11|SPBC12C2.11|II|glutamine-fructose-6-phosphate transaminase (predicted)	1	18	18	18	17	15	17	15	17	15	31.2	31.2	31.2	77.321	696	696	0	56.395	By MS/MS	By MS/MS	28.9	28	295250000	149140000	146120000	128030000	157190000	16	15	31				720	1501;1537;1998;2007;2382;2660;2844;4042;4366;4727;5417;5689;6437;6438;6538;6731;7248;8856	True;True;True;True;True;True;True;True;True;True;True;True;True;True;True;True;True;True	1583;1619;2098;2107;2495;2778;2971;4229;4573;4947;5661;6000;6791;6792;6895;7101;7635;9326	3120;3121;3192;3193;4135;4136;4153;4154;4909;5563;5564;5565;5955;5956;8573;8574;8575;8576;9246;9247;9970;9971;11358;12378;14052;14053;14054;14297;14298;14712;14713;15786;15787;15788;19248;19249;19250;19251	2891;2892;2956;2957;3847;3862;3863;4550;5163;5164;5165;5516;7920;7921;7922;8530;8531;9210;9211;10489;11646;13192;13193;13194;13422;13423;13795;14777;14778;17979;17980;17981	2891;2956;3847;3863;4550;5165;5516;7921;8531;9210;10489;11646;13192;13194;13423;13795;14778;17981
SPBC12C2.13c|fnx1|II|vacuolar	SPBC12C2.13c|fnx1|II|vacuolar	3	3	3	>SPBC12C2.13c|fnx1|II|vacuolar membrane amino acid transmembrane transporter Fnx1	1	3	3	3	2	2	2	2	2	2	3.8	3.8	3.8	58.058	531	531	0	7.1855	By MS/MS	By MS/MS	3.8	2.4	17434000	5295700	12138000	4939500	0	1	2	3				721	1691;5142;5169	True;True;True	1779;5382;5410	3470;10785;10786;10841	3215;9955;10007	3215;9955;10007
SPBC12D12.03|cct1|II|chaperonin-containing	SPBC12D12.03|cct1|II|chaperonin-containing	11	11	11	>SPBC12D12.03|cct1|II|chaperonin-containing T-complex alpha subunit Cct1	1	11	11	11	11	7	11	7	11	7	25.2	25.2	25.2	60.046	556	556	0	42.468	By MS/MS	By MS/MS	25.2	17.8	211870000	105410000	106460000	94854000	109920000	11	5	16				722	1659;1694;1706;2676;3227;3429;3566;6107;6685;7107;8789	True;True;True;True;True;True;True;True;True;True;True	1747;1782;1795;2795;3367;3580;3724;6441;7049;7488;9257	3419;3420;3421;3422;3476;3493;5597;6796;6797;7208;7209;7210;7211;7517;7518;13329;13330;14609;15504;15505;19115;19116	3168;3169;3170;3220;3235;5190;6305;6306;6675;6676;6677;6955;12524;12525;13701;14518;17852;17853	3168;3220;3235;5190;6306;6676;6955;12524;13701;14518;17853
SPBC12D12.04c|pck2|II|protein	SPBC12D12.04c|pck2|II|protein	8	8	8	>SPBC12D12.04c|pck2|II|protein kinase C (PKC)-like Pck2	1	8	8	8	7	7	7	7	7	7	9.7	9.7	9.7	116	1016	1016	0	25.781	By MS/MS	By MS/MS	7.8	9	92253000	35319000	56935000	37442000	52436000	6	5	11				723	1646;2079;3395;3758;4122;4826;8241;9048	True;True;True;True;True;True;True;True	1734;2180;3543;3930;4314;5049;8683;9525	3396;4292;4293;7132;7133;7954;7955;8755;8756;10148;10149;17998;17999;19734	3147;3989;6608;6609;7361;7362;7363;8080;9377;16828;16829;18521	3147;3989;6608;7363;8080;9377;16829;18521
SPBC1306.01c|mef1|II|mitochondrial	SPBC1306.01c|mef1|II|mitochondrial	1	1	1	>SPBC1306.01c|mef1|II|mitochondrial translation elongation factor G (predicted)	1	1	1	1	1	1	1	1	1	1	1	1	1	86.324	770	770	0.0015516	1.7794	By matching	By MS/MS	1	1	3814900	1339800	2475100	0	2475100	0	1	1				724	4304	TRUE	4508	9141;9142	8432	8432
SPBC1306.02|rtt10|II|WD	SPBC1306.02|rtt10|II|WD	1	1	1	>SPBC1306.02|rtt10|II|WD repeat protein, human WDR6 family, involved in endocytic recycling	1	1	1	1	1	0	1	0	1	0	1.2	1.2	1.2	110.98	984	984	0.0045147	1.5561	By MS/MS	By matching	1.2	0	1752100	1752100	0	1634300	0	1	0	1				725	8195	TRUE	8635	17902	16737	16737
SPBC13A2.02|nup82|II|nucleoporin;REV__SPAC323.05c|mtq2|I|protein	SPBC13A2.02|nup82|II|nucleoporin	13;1	13;1	13;1	>SPBC13A2.02|nup82|II|nucleoporin Nup82	2	13	13	13	13	9	13	9	13	9	21.2	21.2	21.2	90.611	803	803;231	0	44.185	By MS/MS	By MS/MS	21.2	12.5	234600000	170670000	63927000	150430000	72689000	14	7	21				726	896;2020;3553;3866;4200;4359;4470;4740;4956;7020;7707;7845;8894	True;True;True;True;True;True;True;True;True;True;True;True;True	940;2120;3709;4045;4398;4566;4684;4960;5189;7399;8119;8265;9366	1935;4174;4175;7489;7490;8172;8173;8931;8932;9235;9236;9237;9471;9993;9994;10422;15330;16783;16784;16785;17138;17139;19338;19339	1782;3881;3882;6930;6931;7558;8232;8520;8521;8522;8746;9232;9233;9630;14360;15689;15690;15691;15692;16020;18058;18059	1782;3882;6931;7558;8232;8520;8746;9233;9630;14360;15692;16020;18059
SPBC13A2.03|SPBC13A2.03|II|phosphatidate	SPBC13A2.03|SPBC13A2.03|II|phosphatidate	1	1	1	>SPBC13A2.03|SPBC13A2.03|II|phosphatidate cytidylyltransferase (predicted)	1	1	1	1	1	1	1	1	1	1	2.1	2.1	2.1	49.936	439	439	0.00079872	2.0518	By MS/MS	By MS/MS	2.1	2.1	6495200	2363500	4131800	0	4131800	1	1	2				727	3074	TRUE	3211	6498;6499	6027;6028	6027
SPBC13E7.01|cwf22|II|splicing	SPBC13E7.01|cwf22|II|splicing	6	6	6	>SPBC13E7.01|cwf22|II|splicing factor Cwf22	1	6	6	6	6	1	6	1	6	1	7.6	7.6	7.6	102.7	886	886	0	16.465	By MS/MS	By matching	7.6	1.5	33460000	29997000	3463000	27980000	0	7	0	7				728	466;1012;2137;3616;7123;7682	True;True;True;True;True;True	487;1063;2241;3777;7505;8089	1043;1044;2169;2170;4402;7615;15539;16707	960;961;2000;4082;7042;14548;15618	961;2000;4082;7042;14548;15618
SPBC13E7.10c|brf1|II|transcription	SPBC13E7.10c|brf1|II|transcription	1	1	1	>SPBC13E7.10c|brf1|II|transcription factor TFIIIB complex subunit Brf1	1	1	1	1	1	1	1	1	1	1	2.6	2.6	2.6	55.795	492	492	0	2.7161	By MS/MS	By matching	2.6	2.6	6983300	4217600	2765800	0	2765800	1	0	1				729	1842	TRUE	1934	3752;3753	3472	3472
SPBC13G1.02|mpg2|II|mannose-1-phosphate	SPBC13G1.02|mpg2|II|mannose-1-phosphate	15	15	15	>SPBC13G1.02|mpg2|II|mannose-1-phosphate guanyltransferase (predicted)	1	15	15	15	12	14	12	14	12	14	48.6	48.6	48.6	46.096	414	414	0	76.53	By MS/MS	By MS/MS	44.4	44.4	417720000	207030000	210690000	197090000	206710000	13	16	29				730	353;505;795;1344;1611;1794;2174;2175;3401;5539;5980;7482;8197;8614;8615	True;True;True;True;True;True;True;True;True;True;True;True;True;True;True	370;526;832;1415;1697;1885;2282;2283;3549;5808;5809;6306;7878;8637;9078;9079	789;790;791;1119;1120;1708;1709;1710;1711;2817;3334;3335;3655;3656;4486;4487;4488;4489;4490;7142;7143;11744;11745;13039;13040;16250;16251;17906;17907;18758;18759;18760;18761	728;729;1028;1029;1568;1569;1570;1571;2599;3086;3087;3384;3385;4158;4159;4160;4161;4162;6616;10877;10878;12256;12257;15190;15191;16741;17523;17524;17525	729;1029;1570;2599;3086;3384;4158;4161;6616;10877;12257;15190;16741;17523;17525	293;294;295	1;37;369
SPBC13G1.13|tfb2|II|transcription	SPBC13G1.13|tfb2|II|transcription	3	3	3	>SPBC13G1.13|tfb2|II|transcription factor TFIIH complex subunit Tfb2	1	3	3	3	2	3	2	3	2	3	5.8	5.8	5.8	51.192	447	447	0	7.3042	By MS/MS	By MS/MS	4	5.8	10985000	3676100	7308800	0	7308800	2	2	4				731	697;2203;4851	True;True;True	726;2311;5075	1503;4540;4541;10197;10198	1377;4204;9421;9422	1377;4204;9421
SPBC146.01|med15|II|mediator	SPBC146.01|med15|II|mediator	12	12	12	>SPBC146.01|med15|II|mediator complex subunit Med15	1	12	12	12	12	7	12	7	12	7	15.1	15.1	15.1	118.45	1063	1063	0	79.692	By MS/MS	By MS/MS	15.1	9.5	212690000	172130000	40559000	142690000	51129000	13	4	17				732	232;612;2829;3033;3487;3641;4543;4628;4686;6237;6423;8513	True;True;True;True;True;True;True;True;True;True;True;True	244;637;2956;3169;3640;3804;3805;4762;4848;4906;6580;6776;8972	542;1319;5926;5927;6383;6384;7340;7666;7667;7668;9623;9624;9786;9899;9900;13613;13614;13615;14024;14025;18562	503;1205;5491;5492;5912;6796;7088;7089;7090;8885;8886;9037;9146;9147;12786;12787;12788;13166;17341	503;1205;5492;5912;6796;7090;8886;9037;9147;12787;13166;17341	296	350
SPBC146.12|coq6|II|monooxygenase	SPBC146.12|coq6|II|monooxygenase	2	2	2	>SPBC146.12|coq6|II|monooxygenase Coq6 (predicted)	1	2	2	2	0	2	0	2	0	2	3.5	3.5	3.5	53.574	479	479	0	3.4144	By matching	By MS/MS	0	3.5	6041500	0	6041500	0	6041500	0	2	2				733	3372;7746	True;True	3520;8159	7088;16870	6569;15769	6569;15769
SPBC146.13c|myo1|II|myosin	SPBC146.13c|myo1|II|myosin	2	2	2	>SPBC146.13c|myo1|II|myosin type I	1	2	2	2	2	2	2	2	2	2	1.9	1.9	1.9	135.71	1217	1217	0	3.8266	By MS/MS	By MS/MS	1.9	1.9	21919000	9875000	12044000	0	12044000	0	1	1				734	4973;5710	True;True	5206;6023	10450;10451;12454;12455	9653;11716	9653;11716
SPBC146.14c|sec26|II|coatomer	SPBC146.14c|sec26|II|coatomer	12	12	12	>SPBC146.14c|sec26|II|coatomer beta subunit (predicted)	1	12	12	12	12	10	12	10	12	10	20.6	20.6	20.6	104.7	940	940	0	35.786	By MS/MS	By MS/MS	20.6	16.1	197980000	112720000	85265000	86308000	104090000	14	10	24				735	188;622;644;1254;4163;4341;4715;5672;6043;7407;7542;8468	True;True;True;True;True;True;True;True;True;True;True;True	200;647;669;1321;4357;4547;4935;5982;6370;7801;7941;8925	460;461;1345;1346;1382;1383;2643;2644;8844;8845;9207;9949;9950;12342;12343;13160;13161;16117;16118;16119;16120;16373;16374;16375;18475;18476	428;429;1228;1229;1262;1263;2435;2436;8153;8154;8492;9189;9190;11615;12357;15070;15071;15072;15073;15304;15305;15306;15307;17261	429;1228;1262;2436;8153;8492;9189;11615;12357;15073;15304;17261
SPBC14C8.02|tim44|II|TIM23	SPBC14C8.02|tim44|II|TIM23	5	5	5	>SPBC14C8.02|tim44|II|TIM23 translocase complex subunit Tim44 (predicted)	1	5	5	5	4	3	4	3	4	3	18	18	18	48.549	427	427	0	12.782	By MS/MS	By MS/MS	13.8	11.5	45203000	27164000	18039000	21498000	21878000	4	3	7				736	1141;1787;2010;3718;4876	True;True;True;True;True	1201;1878;2110;3885;5101	2432;2433;3643;4157;7834;7835;10247	2240;2241;3372;3866;7245;7246;9467	2240;3372;3866;7246;9467
SPBC14C8.03|fma2|II|methionine	SPBC14C8.03|fma2|II|methionine	1	1	1	>SPBC14C8.03|fma2|II|methionine aminopeptidase Fma2 (predicted)	1	1	1	1	1	1	1	1	1	1	2.3	2.3	2.3	47.271	426	426	0.0015601	1.8222	By MS/MS	By MS/MS	2.3	2.3	6628300	4080900	2547300	0	2547300	1	1	2				737	3662	TRUE	3828	7719;7720	7141;7142	7141
SPBC14C8.04|ilv6|II|acetolactate	SPBC14C8.04|ilv6|II|acetolactate	1	1	1	>SPBC14C8.04|ilv6|II|acetolactate synthase regulatory unit Ilv6 (predicted)	1	1	1	1	1	1	1	1	1	1	5.9	5.9	5.9	31.834	289	289	0	3.4127	By MS/MS	By MS/MS	5.9	5.9	11071000	5116900	5953800	0	5953800	1	1	2				738	649	TRUE	674	1391;1392	1270;1271	1271
SPBC14C8.06|arc1|II|ARP2/3	SPBC14C8.06|arc1|II|ARP2/3	4	4	4	>SPBC14C8.06|arc1|II|ARP2/3 actin-organizing complex subunit Sop2	1	4	4	4	3	4	3	4	3	4	15.4	15.4	15.4	41.596	377	377	0	8.5967	By MS/MS	By MS/MS	8.8	15.4	27840000	13227000	14614000	16837000	10114000	3	3	6				739	702;5229;7912;8935	True;True;True;True	731;5471;8335;9408	1509;1510;10955;10956;17270;19415;19416	1382;1383;10113;10114;16137;18130	1383;10114;16137;18130
SPBC14C8.12|rpb8|II|DNA-directed	SPBC14C8.12|rpb8|II|DNA-directed	1	1	1	>SPBC14C8.12|rpb8|II|DNA-directed RNA polymerase I, II and III subunit Rpb8	1	1	1	1	1	1	1	1	1	1	13.6	13.6	13.6	14.3	125	125	0	4.7307	By MS/MS	By MS/MS	13.6	13.6	10944000	4939400	6004500	0	6004500	1	1	2				740	6772	TRUE	7143	14798;14799	13876;13877	13876
SPBC14F5.02|trs65|II|TRAPP	SPBC14F5.02|trs65|II|TRAPP	2	2	2	>SPBC14F5.02|trs65|II|TRAPP complex subunit Trs65 (predicted)	1	2	2	2	1	1	1	1	1	1	4.3	4.3	4.3	57.939	515	515	0.0008	2.0591	By MS/MS	By MS/MS	2.7	1.6	4659300	2751700	1907600	2566600	0	0	1	1				741	138;3075	True;True	146;3212	297;6500	263;6029	263;6029
SPBC14F5.03c|kap123|II|karyopherin	SPBC14F5.03c|kap123|II|karyopherin	4	4	4	>SPBC14F5.03c|kap123|II|karyopherin Kap123	1	4	4	4	4	3	4	3	4	3	5.5	5.5	5.5	117.83	1067	1067	0	14.504	By MS/MS	By MS/MS	5.5	4.2	46025000	18317000	27708000	16047000	28746000	3	3	6				742	1238;5114;5359;7124	True;True;True;True	1303;1304;5354;5602;7506	2613;2614;2615;10726;10727;11201;15540;15541	2407;2408;2409;9902;9903;10337;14549;14550	2407;9902;10337;14549	297	900
SPBC14F5.04c|pgk1|II|phosphoglycerate	SPBC14F5.04c|pgk1|II|phosphoglycerate	43	43	43	>SPBC14F5.04c|pgk1|II|phosphoglycerate kinase Pgk1 (predicted)	1	43	43	43	41	35	41	35	41	35	89.9	89.9	89.9	43.963	414	414	0	294.64	By MS/MS	By MS/MS	87	80.2	5266100000	2689700000	2576400000	2287200000	2739700000	52	45	97				743	68;273;398;462;740;741;1343;1534;1813;1978;2024;2442;2554;3380;3714;3856;3975;4090;4144;4189;4258;4259;4639;5918;5919;5920;6046;6126;7087;7109;7516;7711;8070;8071;8164;8165;8296;8396;8397;8651;8982;9076;9278	True;True;True;True;True;True;True;True;True;True;True;True;True;True;True;True;True;True;True;True;True;True;True;True;True;True;True;True;True;True;True;True;True;True;True;True;True;True;True;True;True;True;True	69;286;287;416;483;773;774;775;1414;1616;1905;2078;2124;2555;2670;3528;3881;4034;4155;4281;4337;4385;4458;4459;4859;6239;6240;6241;6373;6461;7468;7490;7915;8123;8502;8503;8601;8602;8741;8849;8850;9115;9457;9554;9767	140;623;624;625;626;627;884;885;886;887;1034;1035;1585;1586;1587;1588;1589;1590;1591;1592;1593;1594;1595;2814;2815;2816;3186;3696;3697;4094;4095;4096;4097;4183;5038;5039;5341;7100;7101;7824;7825;8146;8147;8399;8400;8682;8683;8684;8685;8802;8900;8901;8902;8903;9036;9037;9038;9805;9806;12883;12884;12885;12886;12887;12888;12889;12890;13165;13381;13382;15458;15459;15460;15461;15462;15463;15507;15508;…	122;574;575;576;577;812;813;814;815;953;954;1454;1455;1456;1457;1458;1459;1460;1461;1462;1463;1464;2595;2596;2597;2598;2950;3418;3811;3812;3889;4673;4674;4967;6580;7235;7236;7534;7535;7763;8018;8019;8020;8117;8200;8201;8202;8203;8331;8332;9055;9056;12104;12105;12106;12107;12108;12109;12110;12111;12112;12361;12577;12578;14479;14480;14481;14482;14483;14520;15265;15698;15699;15700;15701;16447;16448;…	122;574;812;953;1454;1464;2597;2950;3418;3812;3889;4674;4967;6580;7236;7535;7763;8020;8117;8200;8331;8332;9055;12105;12107;12109;12361;12577;14481;14520;15265;15699;16448;16451;16671;16673;16932;17142;17143;17598;18219;18567;18961	298;299;300;301	61;174;187;237
SPBC14F5.05c|sam1|II|S-adenosylmethionine	SPBC14F5.05c|sam1|II|S-adenosylmethionine	21	21	21	>SPBC14F5.05c|sam1|II|S-adenosylmethionine synthetase	1	21	21	21	18	18	18	18	18	18	76.2	76.2	76.2	41.831	382	382	0	133.59	By MS/MS	By MS/MS	69.1	66.2	1436000000	706520000	729450000	650100000	704060000	23	23	46				744	389;606;2309;3237;3477;3493;4082;4949;5060;5126;5706;6512;6615;6616;6928;7192;7520;7898;7906;7907;8023	True;True;True;True;True;True;True;True;True;True;True;True;True;True;True;True;True;True;True;True;True	406;407;630;631;2418;3379;3630;3647;4273;5180;5181;5297;5366;6019;6869;6973;6974;7305;7576;7919;8320;8329;8330;8455	862;863;864;1307;1308;1309;1310;4763;4764;4765;4766;6826;7310;7311;7312;7313;7352;7353;8667;8668;10409;10410;10411;10616;10617;10618;10619;10750;10751;10752;10753;12441;12442;12443;12444;14242;14243;14448;14449;14450;14451;14452;15129;15130;15670;16336;16337;17242;17243;17244;17261;17262;17263;17501;17502;17503;17504	793;794;795;1194;1195;1196;4422;4423;6335;6768;6769;6770;6771;6805;8006;9619;9620;9621;9807;9808;9809;9923;9924;9925;9926;11704;11705;11706;11707;13373;13374;13556;13557;13558;13559;13560;14172;14173;14673;15269;15270;16109;16110;16111;16112;16128;16129;16130;16354;16355;16356	793;1195;4423;6335;6769;6805;8006;9619;9809;9925;11706;13374;13558;13560;14172;14673;15270;16109;16128;16130;16355	302;303	125;151
SPBC14F5.06|rli1|II|iron-sulfur	SPBC14F5.06|rli1|II|iron-sulfur	6	6	6	>SPBC14F5.06|rli1|II|iron-sulfur ATPase involved in ribosome biogenesis and translation Rli1 (predicted)	1	6	6	6	6	3	6	3	6	3	11.6	11.6	11.6	66.589	593	593	0	16.329	By MS/MS	By MS/MS	11.6	5.6	73243000	50262000	22981000	38198000	31665000	6	3	9				745	432;1819;2715;5835;7476;9029	True;True;True;True;True;True	450;1911;2835;6150;7871;9506	957;958;3709;3710;5674;5675;12711;16237;19621	881;882;883;3431;3432;5255;11946;15178;18309	881;3432;5255;11946;15178;18309
SPBC14F5.09c|ade8|II|adenylosuccinate	SPBC14F5.09c|ade8|II|adenylosuccinate	9	9	9	>SPBC14F5.09c|ade8|II|adenylosuccinate lyase Ade8	1	9	9	9	6	7	6	7	6	7	29	29	29	54.307	482	482	0	24.193	By MS/MS	By MS/MS	20.3	24.7	63266000	27018000	36249000	28068000	33381000	4	6	10				746	3806;4012;5182;6029;6332;6674;8188;8990;9145	True;True;True;True;True;True;True;True;True	3980;4197;5423;6356;6679;7035;8628;9465;9628	8047;8492;8493;10862;13133;13134;13821;14576;17893;19532;19533;19935;19936	7446;7843;10029;10030;12334;12977;13661;16729;18230;18710;18711	7446;7843;10030;12334;12977;13661;16729;18230;18710	304	20
SPBC14F5.11c|mug186|II|sorting	SPBC14F5.11c|mug186|II|sorting	1	1	1	>SPBC14F5.11c|mug186|II|sorting nexin Snx41 (predicted)	1	1	1	1	1	1	1	1	1	1	1.2	1.2	1.2	67.001	586	586	0.00080321	2.0689	By MS/MS	By MS/MS	1.2	1.2	4311300	2197700	2113600	0	2113600	1	1	2				747	4872	TRUE	5097	10240;10241	9461;9462	9462
SPBC14F5.13c|pho8|II|vacuolar	SPBC14F5.13c|pho8|II|vacuolar	2	2	2	>SPBC14F5.13c|pho8|II|vacuolar membrane alkaline phosphatase (predicted)	1	2	2	2	1	2	1	2	1	2	3.9	3.9	3.9	58.666	532	532	0	4.8209	By MS/MS	By MS/MS	1.9	3.9	19166000	3358800	15807000	0	15807000	1	2	3				748	157;2413	True;True	166;2526	402;4983;4984	372;4625;4626	372;4626
SPBC1539.03c|arg41|II|argininosuccinate	SPBC1539.03c|arg41|II|argininosuccinate	6	6	6	>SPBC1539.03c|arg41|II|argininosuccinate lyase (predicted)	1	6	6	6	4	4	4	4	4	4	17.6	17.6	17.6	51.571	460	460	0	34.926	By MS/MS	By MS/MS	13.7	12	31284000	18833000	12452000	14660000	15358000	3	3	6				749	2245;2521;5055;5056;7093;8003	True;True;True;True;True;True	2353;2637;5292;5293;7474;8432	4653;5268;10609;10610;15477;15478;17456;17457	4323;4895;9800;9801;14497;14498;16311;16312	4323;4895;9800;9801;14498;16311
SPBC1539.04|tts1|II|tetra	SPBC1539.04|tts1|II|tetra	2	2	2	>SPBC1539.04|tts1|II|tetra spanning protein 1, Tts1	1	2	2	2	2	2	2	2	2	2	6.1	6.1	6.1	31.57	279	279	0	6.2637	By MS/MS	By MS/MS	6.1	6.1	32885000	14338000	18547000	12215000	19706000	2	1	3				750	5663;8668	True;True	5973;9133	12323;12324;18866;18867	11597;17626;17627	11597;17627
SPBC1539.05|cog3|II|Golgi	SPBC1539.05|cog3|II|Golgi	4	4	4	>SPBC1539.05|cog3|II|Golgi transport complex subunit Cog3 (predicted)	1	4	4	4	4	1	4	1	4	1	6.3	6.3	6.3	85.998	735	735	0	10.623	By MS/MS	By MS/MS	6.3	2	13930000	10901000	3029500	10167000	0	4	1	5				751	2184;2790;6338;8749	True;True;True;True	2292;2916;6686;9215	4506;5849;13832;19033;19034	4175;5416;12987;17778;17779	4175;5416;12987;17779
SPBC1539.06|acb1|II|fatty-acyl-CoA	SPBC1539.06|acb1|II|fatty-acyl-CoA	2	2	2	>SPBC1539.06|acb1|II|fatty-acyl-CoA binding binding protein Acb1 (predicted)	1	2	2	2	2	0	2	0	2	0	33.3	33.3	33.3	9.838	87	87	0	4.4078	By MS/MS	By matching	33.3	0	5418900	5418900	0	5054500	0	2	0	2				752	6977;7283	True;True	7356;7673	15246;15863	14279;14843	14279;14843
SPBC1539.09c|trp1|II|anthranilate	SPBC1539.09c|trp1|II|anthranilate	2	2	2	>SPBC1539.09c|trp1|II|anthranilate synthase component II, multifunctional enzyme Trp1	1	2	2	2	2	2	2	2	2	2	1.8	1.8	1.8	83.039	759	759	0.00081301	2.1681	By MS/MS	By MS/MS	1.8	1.8	8937800	4249300	4688500	3534900	5117100	1	3	4				753	722;3954	True;True	753;4133	1544;1545;1546;1547;8353;8354	1415;1416;1417;7720	1416;7720
SPBC15C4.01c|oca3|II|TPR	SPBC15C4.01c|oca3|II|TPR	1	1	1	>SPBC15C4.01c|oca3|II|TPR repeat protein Oca3/ ER membrane protein complex Ecm2 (predicted)	1	1	1	1	1	0	1	0	1	0	4.3	4.3	4.3	32.822	282	282	0.0097087	1.0238	By MS/MS	By matching	4.3	0	0	0	0	0	0	1	0	1				754	3749	TRUE	3921	7942	7352	7352
SPBC15C4.04c|SPBC15C4.04c|II|amino	SPBC15C4.04c|SPBC15C4.04c|II|amino	1	1	1	>SPBC15C4.04c|SPBC15C4.04c|II|amino acid transmembrane transporter (predicted)	1	1	1	1	1	1	1	1	1	1	1.3	1.3	1.3	59.726	542	542	0	2.2099	By MS/MS	By MS/MS	1.3	1.3	6529900	3086400	3443500	0	3443500	1	1	2				755	7712	TRUE	8124	16796;16797	15702;15703	15702
SPBC15D4.03|slm9|II|hira	SPBC15D4.03|slm9|II|hira	1	1	1	>SPBC15D4.03|slm9|II|hira protein Slm9	1	1	1	1	1	0	1	0	1	0	1.4	1.4	1.4	90.432	807	807	0.0051852	1.4502	By MS/MS	By matching	1.4	0	2529300	2529300	0	2359200	0	1	0	1				756	2679	TRUE	2798	5601	5193	5193
SPBC15D4.14|taf73|II|transcription	SPBC15D4.14|taf73|II|transcription	2	2	2	>SPBC15D4.14|taf73|II|transcription factor TFIID complex subunit Taf5-like	1	2	2	2	2	2	2	2	2	2	4.4	4.4	4.4	72.25	642	642	0	6.7156	By matching	By MS/MS	4.4	4.4	16231000	5908500	10322000	5547400	10286000	0	2	2				757	4844;6424	True;True	5068;6777	10183;10184;14026;14027	9409;13167	9409;13167
SPBC15D4.15|pho2|II|4-nitrophenylphosphatase	SPBC15D4.15|pho2|II|4-nitrophenylphosphatase	2	2	2	>SPBC15D4.15|pho2|II|4-nitrophenylphosphatase	1	2	2	2	2	1	2	1	2	1	8.1	8.1	8.1	32.793	298	298	0	3.8235	By MS/MS	By MS/MS	8.1	5	11262000	9208700	2053500	8589400	0	1	1	2				758	5010;8300	True;True	5245;8746	10530;18118;18119;18120	9726;16939;16940;16941	9726;16939
[truncated: 702 more rows]

## Sheet: E160307_LFQ_summary
Accession No	Peptide count, strain KS7611	Peptide count, strain KS8371	Mol. weight [kDa]	Score	LFQ intensity, strain KS7611	LFQ intensity, strain KS8371	LFQ intensity sum (LFQ KS7611+ LFQ KS8371)	LFQ intensity ratio (LFQ KS7611/LFQ KS8371)	Protein Name
[truncated: 1,421 more rows]

## Sheet: E161126_all
Protein IDs	Majority protein IDs	Peptide counts (all)	Peptide counts (razor+unique)	Peptide counts (unique)	Fasta headers	Number of proteins	Peptides	Razor + unique peptides	Unique peptides	Peptides KS7611	Peptides KS8371	Razor + unique peptides KS7611	Razor + unique peptides KS8371	Unique peptides KS7611	Unique peptides KS8371	Sequence coverage [%]	Unique + razor sequence coverage [%]	Unique sequence coverage [%]	Mol. weight [kDa]	Sequence length	Sequence lengths	Q-value	Score	Identification type KS7611	Identification type KS8371	Sequence coverage KS7611 [%]	Sequence coverage KS8371 [%]	Intensity	Intensity KS7611	Intensity KS8371	LFQ intensity KS7611	LFQ intensity KS8371	MS/MS Count KS7611	MS/MS Count KS8371	MS/MS Count	Only identified by site	Reverse	Potential contaminant	id	Peptide IDs	Peptide is razor	Mod. peptide IDs	Evidence IDs	MS/MS IDs	Best MS/MS	Oxidation (M) site IDs	Oxidation (M) site positions
[truncated: 1,187 more rows]

[truncated: 1 more sheets: E161126_LFQ_summary]
