# Supplementary material for: Exportin Crm1 is repurposed as a docking protein to generate microtubule organizing centers at the nuclear pore
Source: eLife. 2018 May 29;7:e33465. doi: 10.7554/eLife.33465 (PMC6008054; doi:10.7554/eLife.33465)
Supplement: Supplementary file 4. [file elife-33465-supp4.xlsx]

## Sheet: E150924_all
Protein IDs	Majority protein IDs	Peptide counts (all)	Peptide counts (razor+unique)	Peptide counts (unique)	Fasta headers	Number of proteins	Peptides	Razor + unique peptides	Unique peptides	Peptides LMB	Peptides noLMB	Razor + unique peptides LMB	Razor + unique peptides noLMB	Unique peptides LMB	Unique peptides noLMB	Sequence coverage [%]	Unique + razor sequence coverage [%]	Unique sequence coverage [%]	Mol. weight [kDa]	Sequence length	Sequence lengths	Q-value	Score	Identification type LMB	Identification type noLMB	Sequence coverage LMB [%]	Sequence coverage noLMB [%]	Intensity	Intensity LMB	Intensity noLMB	LFQ intensity LMB	LFQ intensity noLMB	MS/MS Count LMB	MS/MS Count noLMB	MS/MS Count	Only identified by site	Reverse	Potential contaminant	id	Peptide IDs	Peptide is razor	Mod. peptide IDs	Evidence IDs	MS/MS IDs	Best MS/MS	Oxidation (M) site IDs	Oxidation (M) site positions
SPAC1002.09c|dld1|I|dihydrolipoamide	SPAC1002.09c|dld1|I|dihydrolipoamide	6	6	6	>SPAC1002.09c|dld1|I|dihydrolipoamide dehydrogenase Dld1	1	6	6	6	3	6	3	6	3	6	13.1	13.1	13.1	54.731	511	511	0	37.214	By MS/MS	By MS/MS	6.1	13.1	23487000	7065900	16421000	0	15568000	2	6	8				30	85;325;2449;5061;5562;6109	True;True;True;True;True;True	90;341;2546;5301;5826;6399	182;763;764;5388;11311;11312;12362;12363;13478	173;746;5154;10904;10905;11912;11913;12976;12977	173;746;5154;10904;11912;12976
SPAC1002.17c|urg2|I|uracil	SPAC1002.17c|urg2|I|uracil	3	3	3	>SPAC1002.17c|urg2|I|uracil phosphoribosyltransferase (predicted)	1	3	3	3	3	2	3	2	3	2	16.2	16.2	16.2	22.083	204	204	0	20.195	By MS/MS	By MS/MS	16.2	12.3	13865000	10843000	3022100	10843000	0	1	0	1				31	1428;5115;6024	True;True;True	1494;5355;6307	3036;11411;11412;13306;13307	2892;11002;11003;12809	2892;11002;12809
SPAC1002.19|urg1|I|GTP	SPAC1002.19|urg1|I|GTP	15	15	15	>SPAC1002.19|urg1|I|GTP cyclohydrolase II Urg1 (predicted)	1	15	15	15	15	7	15	7	15	7	39.9	39.9	39.9	49.034	439	439	0	105.57	By MS/MS	By MS/MS	39.9	20	143990000	120910000	23081000	92425000	39789000	15	4	19				32	201;295;910;1375;1376;1511;1884;2048;2687;2767;2990;5244;5367;5776;6518	True;True;True;True;True;True;True;True;True;True;True;True;True;True;True	211;308;309;956;1438;1439;1579;1966;2135;2795;2879;3112;5489;5618;6052;6816	509;510;695;696;1947;2908;2909;3191;3192;4221;4553;4554;5847;5848;5993;6461;6462;11660;11899;12816;12817;14310;14311	498;499;681;682;1861;2766;2767;3043;3044;4077;4381;5587;5588;5728;6198;11234;11458;12350;13805;13806	498;681;1861;2766;2767;3044;4077;4381;5587;5728;6198;11234;11458;12350;13805	28;29	129;224
SPAC1006.07|SPAC1006.07|I|translation;SPAC1F5.10|SPAC1F5.10|I|ATP-dependent	SPAC1006.07|SPAC1006.07|I|translation	12;1	12;1	12;1	>SPAC1006.07|SPAC1006.07|I|translation initiation factor eIF4A (predicted)	2	12	12	12	10	12	10	12	10	12	34.7	34.7	34.7	44.436	392	392;394	0	88.052	By MS/MS	By MS/MS	29.8	34.7	193840000	83405000	110430000	84685000	103420000	10	11	21				33	243;630;823;1058;1766;1805;1994;2563;2851;2887;2982;5327	True;True;True;True;True;True;True;True;True;True;True;True	255;661;862;1111;1841;1881;2080;2664;2964;3004;3103;5574	591;592;1377;1761;1762;2261;2262;3981;3982;4065;4066;4437;5604;5605;6151;6152;6225;6226;6439;6440;11818;11819	576;577;1330;1688;1689;2162;3841;3842;3843;3919;3920;4278;5360;5361;5884;5885;5952;5953;6163;6164;11378;11379	577;1330;1688;2162;3843;3919;4278;5361;5885;5953;6164;11378
SPAC1006.09|win1|I|MAP	SPAC1006.09|win1|I|MAP	7	7	7	>SPAC1006.09|win1|I|MAP kinase kinase kinase Win1	1	7	7	7	4	7	4	7	4	7	5.8	5.8	5.8	163.27	1436	1436	0	45.209	By MS/MS	By MS/MS	3.8	5.8	23504000	7499400	16005000	10725000	11948000	1	6	7				34	933;1144;1241;3457;3614;3981;5049	True;True;True;True;True;True;True	980;1201;1300;3597;3758;4170;5289	1994;1995;2440;2637;7374;7375;7677;8733;8734;11289;11290	1903;2335;2502;7069;7070;7345;8387;10886	1903;2335;2502;7069;7345;8387;10886
SPAC105.03c|SPAC105.03c|I|transcription	SPAC105.03c|SPAC105.03c|I|transcription	1	1	1	>SPAC105.03c|SPAC105.03c|I|transcription factor (predicted)	1	1	1	1	0	1	0	1	0	1	1	1	1	80.989	708	708	0.006816	6.2375	By matching	By MS/MS	0	1	1439800	0	1439800	0	1365000	0	1	1				35	3305	TRUE	3442	7091	6808	6808
SPAC1071.10c|pma1|I|P-type;SPCC1020.01c|pma2|III|P-type	SPAC1071.10c|pma1|I|P-type	25;4	25;4	25;4	>SPAC1071.10c|pma1|I|P-type proton ATPase, P3-type Pma1	2	25	25	25	24	24	24	24	24	24	30.9	30.9	30.9	99.883	919	919;1010	0	220.62	By MS/MS	By MS/MS	28.4	30.9	1001100000	471210000	529940000	443510000	474460000	25	27	52				36	77;518;946;992;1658;1686;2024;2259;2837;2989;3105;3921;4506;4669;4730;4934;5672;5673;5880;5937;6173;6252;6390;6457;6458	True;True;True;True;True;True;True;True;True;True;True;True;True;True;True;True;True;True;True;True;True;True;True;True;True	81;541;993;1042;1729;1759;2110;2111;2351;2950;3111;3236;4091;4092;4723;4894;4956;5172;5944;5945;6160;6218;6465;6545;6685;6753;6754;6755	155;1151;2017;2018;2113;2114;3587;3588;3654;3655;4496;4497;4498;5030;5031;5032;6118;6119;6457;6458;6459;6460;6702;6703;8448;8449;8450;8451;10113;10114;10542;10543;10659;10660;11068;11069;12595;12596;12597;12598;12599;12600;13021;13022;13128;13129;13594;13595;13745;13746;14020;14021;14204;14205;14206;14207;14208	148;1109;1928;1929;2023;2024;3448;3449;3516;3517;3518;4329;4330;4331;4819;4820;5851;5852;6193;6194;6195;6196;6197;6429;8084;8085;8086;8087;9761;10177;10178;10285;10679;10680;12135;12136;12137;12138;12139;12140;12535;12637;12638;13087;13088;13235;13236;13504;13505;13708;13709;13710;13711;13712	148;1109;1928;2024;3448;3516;4329;4820;5851;6194;6429;8086;9761;10178;10285;10680;12136;12139;12535;12638;13087;13235;13505;13709;13711	30;31;32;33	103;256;554;629
SPAC1093.01|ppr5|I|mitochondrial	SPAC1093.01|ppr5|I|mitochondrial	2	2	2	>SPAC1093.01|ppr5|I|mitochondrial PPR repeat protein Ppr5	1	2	2	2	1	2	1	2	1	2	1.4	1.4	1.4	141.95	1261	1261	0	11.264	By matching	By MS/MS	0.7	1.4	2383700	863360	1520300	0	1441400	0	2	2				37	539;2137	True;True	562;2226	1184;4735;4736	1140;4555	1140;4555
SPAC10F6.01c|sir1|I|sulfite	SPAC10F6.01c|sir1|I|sulfite	16	16	16	>SPAC10F6.01c|sir1|I|sulfite reductase beta subunit Sir1	1	16	16	16	11	16	11	16	11	16	15.1	15.1	15.1	163.84	1473	1473	0	120.21	By MS/MS	By MS/MS	10.9	15.1	112070000	38457000	73615000	42952000	65298000	7	10	17				38	300;496;969;1640;2607;3083;3124;3739;4301;4910;5542;5831;6030;6459;6469;6642	True;True;True;True;True;True;True;True;True;True;True;True;True;True;True;True	314;517;1017;1710;2712;3213;3255;3886;4509;5146;5805;6110;6314;6756;6767;6946	706;707;1100;1101;2063;2064;3551;3552;5695;6660;6661;6738;7913;7914;9679;11022;11023;12319;12320;12924;13320;14209;14210;14231;14232;14576;14577	691;692;1063;1975;1976;3413;3414;5442;6387;6462;7568;7569;9367;10636;11871;12443;12825;13713;13732;14064	691;1063;1975;3414;5442;6387;6462;7569;9367;10636;11871;12443;12825;13713;13732;14064
SPAC10F6.03c|cts1|I|CTP	SPAC10F6.03c|cts1|I|CTP	7	7	7	>SPAC10F6.03c|cts1|I|CTP synthase Cts1 (predicted)	1	7	7	7	6	7	6	7	6	7	16.3	16.3	16.3	66.867	600	600	0	56.755	By MS/MS	By MS/MS	14.2	16.3	71298000	32083000	39214000	34823000	34439000	6	6	12				39	540;1056;1969;3159;5691;6423;6636	True;True;True;True;True;True;True	563;1109;2055;3290;5966;6718;6940	1185;1186;2257;2258;4389;4390;6797;6798;12638;12639;14141;14142;14565	1141;1142;2158;2159;4232;4233;6515;6516;12176;12177;12178;13649;13650;14054	1142;2159;4233;6515;12177;13649;14054
SPAC10F6.06|vip1|I|RNA-binding	SPAC10F6.06|vip1|I|RNA-binding	7	7	7	>SPAC10F6.06|vip1|I|RNA-binding protein Vip1	1	7	7	7	4	6	4	6	4	6	38.1	38.1	38.1	27.459	257	257	0	88.89	By MS/MS	By MS/MS	25.3	32.7	40252000	21172000	19080000	21175000	18086000	3	5	8				40	1782;2017;4212;4220;4470;4745;5321	True;True;True;True;True;True;True	1858;2103;4411;4420;4686;4971;5568	4012;4013;4481;9462;9463;9481;10033;10687;10688;11809	3870;3871;4317;9161;9177;9689;10311;10312;11370	3871;4317;9161;9177;9689;10312;11370
SPAC10F6.09c|psm3|I|mitotic	SPAC10F6.09c|psm3|I|mitotic	8	8	8	>SPAC10F6.09c|psm3|I|mitotic cohesin complex subunit Psm3/Smc3	1	8	8	8	4	8	4	8	4	8	7.5	7.5	7.5	136.85	1194	1194	0	55.442	By MS/MS	By MS/MS	4.5	7.5	88294000	39867000	48427000	42475000	43305000	2	7	9				41	1004;1022;1611;2612;2790;4867;5003;5083	True;True;True;True;True;True;True;True	1054;1072;1681;2717;2903;5102;5242;5323	2140;2141;2180;3499;3500;5704;5705;6034;10938;11203;11204;11350	2049;2050;2088;3365;5451;5452;5774;10559;10808;10943	2049;2088;3365;5451;5774;10559;10808;10943
SPAC10F6.11c|atg17|I|autophagy	SPAC10F6.11c|atg17|I|autophagy	2	2	2	>SPAC10F6.11c|atg17|I|autophagy associated protein kinase activator Atg17	1	2	2	2	1	2	1	2	1	2	8	8	8	47.061	411	411	0	11.516	By MS/MS	By MS/MS	2.9	8	5464600	3147000	2317600	0	2197300	1	1	2				42	1995;4515	True;True	2081;4733	4438;4439;10131	4279;4280;9775	4279;9775
SPAC10F6.13c|caa1|I|cytoplasmic	SPAC10F6.13c|caa1|I|cytoplasmic	6	6	6	>SPAC10F6.13c|caa1|I|cytoplasmic aspartate aminotransferase Caa1 (predicted)	1	6	6	6	5	4	5	4	5	4	19.6	19.6	19.6	46.14	409	409	0	43.298	By MS/MS	By MS/MS	17.1	12.2	36694000	17715000	18979000	15004000	20704000	5	4	9				43	815;1169;2217;2776;6037;6477	True;True;True;True;True;True	854;1226;2308;2888;6321;6775	1748;1749;2487;2488;4943;4944;6008;13332;14246	1678;1679;2374;2375;4745;4746;5743;12835;13743	1679;2374;4745;5743;12835;13743
SPAC10F6.17c|SPAC10F6.17c|I|mitochondrial	SPAC10F6.17c|SPAC10F6.17c|I|mitochondrial	2	2	2	>SPAC10F6.17c|SPAC10F6.17c|I|mitochondrial pyruvate dehydrogenase (lipoamide) phosphatase (predicted)	1	2	2	2	2	2	2	2	2	2	5	5	5	49.74	444	444	0	13.405	By MS/MS	By MS/MS	5	5	8067900	6447900	1620000	6447900	0	1	1	2				44	2698;4452	True;True	2808;4668	5873;5874;9999;10000	5611;5612;9659	5611;9659
SPAC110.04c|pss1|I|heat	SPAC110.04c|pss1|I|heat	30	30	30	>SPAC110.04c|pss1|I|heat shock protein Pss1	1	30	30	30	28	27	28	27	28	27	47.1	47.1	47.1	80.374	720	720	0	291.37	By MS/MS	By MS/MS	43.3	39.3	838770000	468420000	370350000	416670000	314430000	30	26	56				45	87;219;268;290;291;310;322;909;1228;1446;3081;3102;3360;3486;3699;3744;3990;4548;4710;4736;4780;5220;5353;5578;5677;5709;5728;5755;6132;6517	True;True;True;True;True;True;True;True;True;True;True;True;True;True;True;True;True;True;True;True;True;True;True;True;True;True;True;True;True;True	92;230;281;303;304;324;338;955;1287;1512;3211;3233;3498;3627;3628;3845;3891;4179;4768;4935;4962;5008;5464;5602;5842;5949;5984;6003;6031;6422;6815	185;186;545;546;644;645;685;686;687;688;725;756;757;1945;1946;2611;2612;3067;3068;3069;3070;3071;3072;6657;6658;6696;6697;7189;7190;7429;7430;7431;7432;7836;7837;7922;7923;9004;9005;10216;10620;10621;10622;10670;10671;10761;10762;10763;10764;11608;11609;11869;11870;12388;12389;12609;12671;12672;12708;12709;12764;13521;14306;14307;14308;14309	176;177;532;533;626;627;670;671;672;673;709;738;739;1859;1860;2478;2479;2925;2926;2927;2928;2929;6384;6385;6422;6423;6897;6898;7121;7122;7123;7124;7492;7493;7577;8727;8728;9858;10247;10248;10294;10295;10388;10389;10390;10391;11187;11426;11427;11935;12146;12210;12211;12247;12248;12296;13018;13802;13803;13804	176;533;626;671;672;709;739;1859;2479;2925;6384;6422;6898;7123;7492;7577;8728;9858;10247;10295;10390;11187;11426;11935;12146;12210;12248;12296;13018;13804	34	175
SPAC1142.06|get3|I|GET	SPAC1142.06|get3|I|GET	3	3	3	>SPAC1142.06|get3|I|GET complex ATPase subunit Get3 (predicted)	1	3	3	3	1	2	1	2	1	2	15.2	15.2	15.2	36.548	329	329	0	17.054	By MS/MS	By MS/MS	3	12.2	5499600	0	5499600	0	5214100	1	2	3				46	1453;4837;5182	True;True;True	1519;5071;5425	3084;10884;11537	2940;10511;11122	2940;10511;11122
SPAC11E3.07|vma4|I|V-type	SPAC11E3.07|vma4|I|V-type	3	3	3	>SPAC11E3.07|vma4|I|V-type ATPase V1 subunit E (predicted)	1	3	3	3	2	3	2	3	2	3	12.8	12.8	12.8	25.741	227	227	0	18.546	By MS/MS	By MS/MS	7	12.8	233610000	124030000	109580000	117200000	103570000	3	4	7				47	3111;5043;5933	True;True;True	3242;5283;6214	6713;6714;6715;6716;6717;6718;11278;13120;13121	6439;6440;6441;6442;10877;12629;12630	6441;10877;12630
SPAC11E3.15|rpl22|I|60S	SPAC11E3.15|rpl22|I|60S	1	1	1	>SPAC11E3.15|rpl22|I|60S ribosomal protein L22 (predicted)	1	1	1	1	1	1	1	1	1	1	10.3	10.3	10.3	13.32	117	117	0.0031283	6.9788	By MS/MS	By MS/MS	10.3	10.3	2393500	1000600	1393000	0	1320700	1	1	2				48	2308	TRUE	2400	5115;5116	4896;4897	4896
SPAC11G7.03|idh1|I|isocitrate	SPAC11G7.03|idh1|I|isocitrate	11	11	11	>SPAC11G7.03|idh1|I|isocitrate dehydrogenase (NAD+) subunit 1 Idh1	1	11	11	11	9	11	9	11	9	11	40.7	40.7	40.7	38.758	356	356	0	100.74	By MS/MS	By MS/MS	31.5	40.7	134320000	66322000	68000000	65371000	64412000	10	11	21				49	728;864;1146;1206;1783;2055;2234;3022;5156;5324;5406	True;True;True;True;True;True;True;True;True;True;True	763;908;1203;1264;1859;2142;2325;3149;5399;5571;5659	1580;1581;1582;1848;1849;2442;2443;2562;2563;4014;4015;4566;4567;4977;4978;6535;6536;11488;11489;11490;11814;11979	1516;1517;1518;1765;1766;2337;2338;2437;2438;3872;3873;4394;4395;4773;4774;6263;6264;11076;11077;11375;11539	1516;1765;2338;2438;3872;4395;4774;6264;11077;11375;11539	35	60
SPAC1805.12c|uep1|I|ribosomal-ubiquitin;SPAC11G7.04|ubi1|I|ribosomal-ubiquitin;SPAC6G10.11c|ubi3|I|ribosomal-ubiquitin;SPAC589.10c|ubi5|I|ribosomal-ubiquitin;SPBC337.08c|ubi4|II|ubiquitin	SPAC1805.12c|uep1|I|ribosomal-ubiquitin;SPAC11G7.04|ubi1|I|ribosomal-ubiquitin;SPAC6G10.11c|ubi3|I|ribosomal-ubiquitin;SPAC589.10c|ubi5|I|ribosomal-ubiquitin;SPBC337.08c|ubi4|II|ubiquitin	4;4;4;4;4	4;4;4;4;4	4;4;4;4;4	>SPAC1805.12c|uep1|I|ribosomal-ubiquitin fusion protein Ubi2;>SPAC11G7.04|ubi1|I|ribosomal-ubiquitin fusion protein Ubi1 (predicted);>SPAC6G10.11c|ubi3|I|ribosomal-ubiquitin fusion protein Ubi3 (predicted);>SPAC589.10c|ubi5|I|ribosomal-ubiquitin fusion pro	5	4	4	4	4	4	4	4	4	4	36.7	36.7	36.7	14.595	128	128;128;150;150;382	0	63.158	By MS/MS	By MS/MS	36.7	36.7	1056100000	623770000	432350000	605600000	428070000	7	7	14				50	1191;2664;5488;5537	True;True;True;True	1248;2770;5745;5799	2524;2525;2526;2527;5794;5795;12162;12163;12164;12165;12287;12288	2406;2407;2408;2409;5535;5536;5537;11710;11711;11712;11713;11714;11715;11836;11837;11838	2407;5535;11714;11837
SPAC11H11.06|arp2|I|ARP2/3	SPAC11H11.06|arp2|I|ARP2/3	6	6	6	>SPAC11H11.06|arp2|I|ARP2/3 actin-organizing complex subunit Arp2	1	6	6	6	4	6	4	6	4	6	12.1	12.1	12.1	44.23	390	390	0	36.649	By MS/MS	By MS/MS	7.4	12.1	43571000	16552000	27020000	19201000	22968000	3	5	8				51	119;1516;1517;5304;6532;6583	True;True;True;True;True;True	127;1584;1585;5551;6830;6886	360;3200;3201;3202;3203;11777;11778;14334;14335;14446	352;3050;3051;3052;11343;11344;13829;13830;13937	352;3050;3052;11343;13829;13937
SPAC1250.04c|atl1|I|alkyltransferase-like	SPAC1250.04c|atl1|I|alkyltransferase-like	1	1	1	>SPAC1250.04c|atl1|I|alkyltransferase-like protein Atl1	1	1	1	1	1	1	1	1	1	1	13	13	13	12.67	108	108	0.0077071	6.1635	By MS/MS	By matching	13	13	12205000	6533100	5672300	0	5377900	1	0	1				52	1946	TRUE	2032	4343;4344	4193	4193
SPAC12B10.01c|SPAC12B10.01c|I|HECT-type	SPAC12B10.01c|SPAC12B10.01c|I|HECT-type	1	1	1	>SPAC12B10.01c|SPAC12B10.01c|I|HECT-type ubiquitin-protein ligase E3 (predicted)	1	1	1	1	1	1	1	1	1	1	0.9	0.9	0.9	185.61	1647	1647	0.0021368	7.2464	By matching	By MS/MS	0.9	0.9	2697300	952270	1745000	0	1654400	0	1	1				53	1032	TRUE	1083	2200;2201	2107	2107
SPAC12B10.03|bun62|I|WD	SPAC12B10.03|bun62|I|WD	3	3	3	>SPAC12B10.03|bun62|I|WD repeat protein, human WDR20 family, Bun62	1	3	3	3	2	3	2	3	2	3	5.2	5.2	5.2	61.81	543	543	0	17.802	By MS/MS	By MS/MS	3.7	5.2	7016100	1830700	5185400	0	4916200	2	3	5				54	1256;2064;2628	True;True;True	1315;2151;2733	2664;2665;4584;4585;5733	2530;2531;4412;4413;5479	2531;4412;5479
SPAC12G12.04|mcp60|I|mitochondrial	SPAC12G12.04|mcp60|I|mitochondrial	22	22	22	>SPAC12G12.04|mcp60|I|mitochondrial heat shock protein Hsp60/Mcp60	1	22	22	22	22	20	22	20	22	20	47.3	47.3	47.3	62.167	582	582	0	210.64	By MS/MS	By MS/MS	47.3	42.4	767970000	328220000	439750000	353720000	383260000	22	19	41				55	231;252;413;440;527;1596;1793;1897;1984;2020;2769;2988;3628;3797;4700;5126;5267;5482;5559;5832;5888;6139	True;True;True;True;True;True;True;True;True;True;True;True;True;True;True;True;True;True;True;True;True;True	242;264;432;459;550;1666;1869;1980;2070;2106;2881;3110;3772;3945;4925;5366;5512;5739;5823;6111;6168;6429	566;567;607;608;927;979;980;1164;1165;3469;3470;4034;4035;4036;4245;4246;4419;4420;4486;4487;5996;5997;6454;6455;6456;7701;7702;8037;8038;10599;10600;11428;11429;11702;11703;11704;12152;12153;12357;12358;12925;12926;13034;13531;13532	550;551;590;591;895;947;948;1121;1122;3338;3339;3889;3890;4102;4103;4259;4260;4322;4323;5731;5732;6189;6190;6191;6192;7367;7368;7686;10230;10231;10232;11019;11020;11274;11275;11700;11701;11907;11908;12444;12445;12547;13028;13029	550;591;895;947;1121;3339;3889;4102;4260;4323;5732;6189;7368;7686;10232;11019;11275;11700;11907;12445;12547;13028
SPAC12G12.06c|rcl1|I|rRNA	SPAC12G12.06c|rcl1|I|rRNA	3	3	3	>SPAC12G12.06c|rcl1|I|rRNA processing protein Rcl1 (predicted)	1	3	3	3	2	2	2	2	2	2	8.5	8.5	8.5	39.525	363	363	0	30.108	By MS/MS	By MS/MS	5.2	6.1	11373000	2917700	8455600	0	8016700	2	1	3				56	1524;3781;5638	True;True;True	1593;3929;5908	3218;3219;8005;12527	3066;3067;7656;12069	3066;7656;12069
SPAC139.01c|ath2|I|Ath1	SPAC139.01c|ath2|I|Ath1	1	1	1	>SPAC139.01c|ath2|I|Ath1 complex protein Ath2 nuclease, XP-G family (predicted)	1	1	1	1	1	1	1	1	1	1	1.1	1.1	1.1	90.152	802	802	0.0022727	7.995	By MS/MS	By MS/MS	1.1	1.1	4028900	2161000	1867900	0	1770900	1	1	2				57	2703	TRUE	2815	5887;5888	5628;5629	5628
SPAC13A11.02c|erg11|I|sterol	SPAC13A11.02c|erg11|I|sterol	7	7	7	>SPAC13A11.02c|erg11|I|sterol 14-demethylase Erg11 (predicted)	1	7	7	7	7	5	7	5	7	5	19.2	19.2	19.2	56.331	495	495	0	51.936	By MS/MS	By MS/MS	19.2	11.9	45252000	23348000	21904000	19003000	25112000	5	5	10				58	995;1603;1639;3024;4899;5295;6223	True;True;True;True;True;True;True	1045;1673;1709;3151;5135;5542;6516	2117;2118;3482;3549;3550;6539;6540;10998;10999;11761;13694;13695	2028;2029;3351;3411;3412;6267;6268;10615;10616;11329;13190;13191	2028;3351;3412;6268;10616;11329;13190
SPAC13A11.05|ysp2|I|peptidase	SPAC13A11.05|ysp2|I|peptidase	1	1	1	>SPAC13A11.05|ysp2|I|peptidase family M17 cytoplasmic leucyl aminopeptidase yspII (LAP yspII)	1	1	1	1	1	0	1	0	1	0	2.5	2.5	2.5	56.194	513	513	0.00501	6.456	By MS/MS	By matching	2.5	0	2237800	2237800	0	2237800	0	1	0	1				59	5895	TRUE	6175	13046	12558	12558
SPCC1494.11c|Tf2-13|III|retrotransposable;SPBC1E8.04|Tf2-10|II|retrotransposable;SPCC1020.14|Tf2-12|III|retrotransposable;SPBC9B6.02c|Tf2-9|II|retrotransposable;SPBC1289.17|Tf2-11|II|retrotransposable;SPAPB15E9.03c|Tf2-5|I|retrotransposable;SPAC9.04|Tf2-1|I|retrotransposable;SPAC2E1P3.03c|Tf2-3|I|retrotransposable;SPAC27E2.08|Tf2-6|I|retrotransposable;SPAC26A3.13c|Tf2-4|I|retrotransposable;SPAC19…	SPCC1494.11c|Tf2-13|III|retrotransposable;SPBC1E8.04|Tf2-10|II|retrotransposable;SPCC1020.14|Tf2-12|III|retrotransposable;SPBC9B6.02c|Tf2-9|II|retrotransposable;SPBC1289.17|Tf2-11|II|retrotransposable;SPAPB15E9.03c|Tf2-5|I|retrotransposable;SPAC9.04|Tf2-1|I|retrotransposable;SPAC2E1P3.03c|Tf2-3|I|retrotransposable;SPAC27E2.08|Tf2-6|I|retrotransposable;SPAC26A3.13c|Tf2-4|I|retrotransposable;SPAC19…	7;7;7;7;7;7;7;7;7;7;7;7;7	7;7;7;7;7;7;7;7;7;7;7;7;7	7;7;7;7;7;7;7;7;7;7;7;7;7	>SPCC1494.11c|Tf2-13|III|retrotransposable element/transposon Tf2-type;>SPBC1E8.04|Tf2-10|II|retrotransposable element/transposon Tf2-type;>SPCC1020.14|Tf2-12|III|retrotransposable element/transposon Tf2-type;>SPBC9B6.02c|Tf2-9|II|retrotransposable element	13	7	7	7	4	7	4	7	4	7	5.4	5.4	5.4	154.8	1332	1332;1332;1333;1333;1333;1333;1333;1333;1333;1333;1333;1333;1333	0	50.352	By MS/MS	By MS/MS	2.9	5.4	25525000	11076000	14449000	10569000	14207000	3	5	8				60	799;3309;3505;4426;4775;5369;5931	True;True;True;True;True;True;True	837;3447;3647;4640;5003;5620;6212	1719;1720;7099;7467;9945;9946;10750;10751;11901;13116;13117	1650;1651;6814;7155;9612;9613;10376;10377;11460;12625	1650;6814;7155;9613;10377;11460;12625
SPAC13F5.06c|sec10|I|exocyst	SPAC13F5.06c|sec10|I|exocyst	10	10	10	>SPAC13F5.06c|sec10|I|exocyst complex subunit Sec10	1	10	10	10	8	9	8	9	8	9	13.4	13.4	13.4	92.515	811	811	0	73.919	By MS/MS	By MS/MS	10.7	12.1	69170000	29495000	39675000	30914000	36196000	7	10	17				61	968;1290;2589;3257;4304;4832;4900;5370;5536;5862	True;True;True;True;True;True;True;True;True;True	1016;1350;2692;3394;4512;5066;5136;5621;5798;6142	2061;2062;2735;2736;5657;5658;7005;7006;9690;10875;11000;11902;11903;12285;12286;12985;12986	1973;1974;2590;2591;5409;5410;5411;6719;6720;9378;10503;10617;11461;11834;11835;12502;12503	1973;2590;5411;6720;9378;10503;10617;11461;11835;12503
SPAC13G6.02c|rps101|I|40S	SPAC13G6.02c|rps101|I|40S	8	1	1	>SPAC13G6.02c|rps101|I|40S ribosomal protein S3a	1	8	1	1	8	8	1	1	1	1	27.8	3.6	3.6	28.488	252	252	0.0021575	7.3589	By MS/MS	By MS/MS	27.8	27.8	18959000	9009800	9948700	0	9432300	1	1	2				62	388;2422;2542;3330;3606;5647;5666;6209	False;True;False;False;False;False;False;False	405;2519;2642;3468;3750;5917;5938;6502	877;878;5337;5338;5564;5565;7135;7136;7662;7663;12540;12541;12542;12586;12587;13671;13672	849;850;5099;5100;5322;5323;6848;6849;7332;12081;12082;12127;12128;13168;13169	849;5100;5323;6848;7332;12081;12128;13168
SPAC13G6.06c|gcv2|I|glycine	SPAC13G6.06c|gcv2|I|glycine	1	1	1	>SPAC13G6.06c|gcv2|I|glycine cleavage complex subunit P (predicted)	1	1	1	1	1	1	1	1	1	1	1.2	1.2	1.2	114.23	1031	1031	0.0021345	7.2423	By MS/MS	By MS/MS	1.2	1.2	7613200	3736300	3876900	0	3675600	2	1	3				63	5660	TRUE	5932	12570;12571	12111;12112;12113	12113
SPAC13G6.07c|rps601|I|40S;SPAPB1E7.12|rps602|I|40S	SPAC13G6.07c|rps601|I|40S;SPAPB1E7.12|rps602|I|40S	4;3	4;3	4;3	>SPAC13G6.07c|rps601|I|40S ribosomal protein S6;>SPAPB1E7.12|rps602|I|40S ribosomal protein S6	2	4	4	4	4	4	4	4	4	4	23.4	23.4	23.4	27.499	239	239;239	0	33.756	By MS/MS	By MS/MS	23.4	23.4	55631000	27695000	27936000	20601000	19260000	6	5	11				64	1671;3300;4440;4441	True;True;True;True	1744;3437;4655;4656;4657	3615;3616;7083;7084;9973;9974;9975;9976;9977;9978;9979;9980	3476;3477;6800;6801;9636;9637;9638;9639;9640;9641;9642;9643	3476;6801;9636;9643	36	63
SPAC13G6.11c|erg12|I|mevalonate	SPAC13G6.11c|erg12|I|mevalonate	1	1	1	>SPAC13G6.11c|erg12|I|mevalonate kinase Erg12 (predicted)	1	1	1	1	1	0	1	0	1	0	2.5	2.5	2.5	43.406	404	404	0.0030801	6.7796	By MS/MS	By matching	2.5	0	0	0	0	0	0	1	0	1				65	3226	TRUE	3362	6946	6661	6661
SPAC13G7.02c|ssa1|I|heat	SPAC13G7.02c|ssa1|I|heat	38	12	12	>SPAC13G7.02c|ssa1|I|heat shock protein Ssa1 (predicted)	1	38	12	12	37	37	12	11	12	11	54.7	17.5	17.5	70.142	644	644	0	115.1	By MS/MS	By MS/MS	50.9	54.3	398110000	217300000	180810000	193450000	156350000	15	8	23				66	420;454;605;624;655;703;1070;1176;1323;1332;1990;2348;2501;2750;2970;3789;3790;3800;3801;3938;4070;4224;4225;4240;4241;4242;4267;4271;4272;4831;4938;4939;5183;5399;5497;5664;5834;6175	False;False;False;False;True;False;True;True;False;False;False;True;False;False;True;True;True;False;False;True;False;False;False;False;False;False;True;False;False;True;False;False;True;True;False;False;False;False	439;474;632;655;687;738;1123;1124;1233;1383;1392;2076;2442;2600;2862;3090;3937;3938;3948;3949;4116;4263;4424;4425;4426;4427;4443;4444;4445;4473;4477;4478;5065;5176;5177;5426;5650;5757;5936;6113;6467	938;939;1008;1009;1010;1011;1012;1013;1014;1015;1016;1017;1018;1319;1320;1321;1322;1368;1369;1436;1437;1533;1534;2284;2285;2286;2287;2498;2499;2794;2795;2819;2820;2821;2822;2823;2824;4429;4430;5192;5193;5483;5484;5964;5965;6400;6401;8018;8019;8020;8021;8046;8047;8048;8049;8050;8051;8620;9185;9186;9187;9188;9487;9488;9489;9490;9491;9492;9493;9494;9495;9496;9497;9498;9499;9500;9524;9525;9526;9527;9…	906;907;977;978;979;980;981;982;983;984;985;1269;1270;1271;1272;1273;1274;1275;1276;1320;1321;1384;1385;1474;2183;2184;2185;2186;2385;2386;2642;2643;2668;2669;2670;2671;2672;2673;2674;2675;2676;2677;2678;2679;2680;2681;2682;2683;2684;2685;2686;4270;4271;4964;4965;5247;5248;5701;5702;6126;6127;7669;7670;7671;7693;7694;7695;7696;7697;8277;8902;8903;8904;8905;9182;9183;9184;9185;9186;9187;9188;9189;…	906;984;1269;1320;1385;1474;2185;2386;2642;2681;4271;4964;5247;5701;6127;7669;7670;7693;7697;8277;8904;9193;9197;9221;9224;9225;9279;9288;9289;10502;10689;10691;11123;11513;11742;12122;12450;13092	37;38	59;605
SPAC140.01|sdh2|I|succinate	SPAC140.01|sdh2|I|succinate	1	1	1	>SPAC140.01|sdh2|I|succinate dehydrogenase (ubiquinone) iron-sulfur protein subunit (predicted)	1	1	1	1	1	1	1	1	1	1	4	4	4	31.425	275	275	0.0021954	7.5644	By MS/MS	By MS/MS	4	4	14620000	6631200	7988700	0	7573900	1	1	2				67	771	TRUE	807	1665;1666	1596;1597	1597
SPAC1420.02c|cct5|I|chaperonin-containing	SPAC1420.02c|cct5|I|chaperonin-containing	10	10	10	>SPAC1420.02c|cct5|I|chaperonin-containing T-complex epsilon subunit Cct5	1	10	10	10	10	9	10	9	10	9	23.3	23.3	23.3	59.377	546	546	0	83.783	By MS/MS	By MS/MS	23.3	22	83497000	37025000	46472000	37133000	43952000	12	10	22				68	191;303;528;631;2151;2560;2856;3473;4436;4437	True;True;True;True;True;True;True;True;True;True	201;317;551;662;2241;2661;2969;3613;4651;4652	493;494;495;711;712;1166;1378;1379;4773;4774;5598;5599;6160;6161;7405;7406;9965;9966;9967;9968	481;482;483;484;485;696;697;1123;1331;1332;4591;4592;4593;5354;5355;5892;7097;7098;9629;9630;9631;9632	485;697;1123;1331;4593;5354;5892;7097;9630;9632
SPAPB8E5.02c|rpn502|I|19S;SPAC1420.03|rpn501|I|19S	SPAPB8E5.02c|rpn502|I|19S;SPAC1420.03|rpn501|I|19S	17;17	17;17	17;17	>SPAPB8E5.02c|rpn502|I|19S proteasome regulatory subunit Rpn502;>SPAC1420.03|rpn501|I|19S proteasome regulatory subunit Rpn501	2	17	17	17	14	17	14	17	14	17	38.8	38.8	38.8	51.618	443	443;443	0	155.81	By MS/MS	By MS/MS	33.4	38.8	426080000	200800000	225280000	196020000	215510000	12	16	28				69	159;160;570;2272;2447;2632;2641;2835;3525;3727;3728;3887;4805;5134;5737;6009;6200	True;True;True;True;True;True;True;True;True;True;True;True;True;True;True;True;True	169;170;594;2364;2544;2737;2747;2948;3669;3874;3875;4047;5038;5376;6012;6292;6492	434;435;436;437;1240;5052;5053;5384;5385;5738;5739;5753;6115;7509;7510;7511;7892;7893;7894;7895;8360;8361;8362;10822;10823;11448;11449;12726;12727;13279;13280;13653;13654	424;425;426;427;428;1191;4836;5150;5151;5484;5485;5499;5847;7199;7200;7201;7546;7547;7548;7549;8011;8012;10448;10449;11042;12262;12263;12781;12782;13145	425;428;1191;4836;5151;5484;5499;5847;7201;7547;7549;8012;10448;11042;12263;12781;13145	39	303
SPAC144.03|ade2|I|adenylosuccinate	SPAC144.03|ade2|I|adenylosuccinate	6	6	6	>SPAC144.03|ade2|I|adenylosuccinate synthetase Ade2	1	6	6	6	5	6	5	6	5	6	16.1	16.1	16.1	47.876	434	434	0	40.12	By MS/MS	By MS/MS	13.6	16.1	22097000	9109700	12988000	9780600	11642000	3	4	7				70	52;202;577;2291;3115;3355	True;True;True;True;True;True	53;212;601;2383;3246;3493	102;103;511;512;1252;1253;5084;5085;6723;7179;7180	95;96;500;501;1202;1203;4867;6447;6888	96;501;1203;4867;6447;6888
SPAC31G5.03|rps1101|I|40S;SPAC144.11|rps1102|I|40S	SPAC31G5.03|rps1101|I|40S;SPAC144.11|rps1102|I|40S	10;10	10;10	10;10	>SPAC31G5.03|rps1101|I|40S ribosomal protein S11 (predicted);>SPAC144.11|rps1102|I|40S ribosomal protein S11 (predicted)	2	10	10	10	9	10	9	10	9	10	54.6	54.6	54.6	17.5	152	152;152	0	84.834	By MS/MS	By MS/MS	53.9	54.6	431890000	174280000	257600000	184780000	233730000	9	10	19				71	590;842;1257;2593;2623;4112;4556;4660;5583;5584	True;True;True;True;True;True;True;True;True;True	615;885;1316;2696;2728;4305;4777;4885;5849;5850	1277;1278;1805;1806;2666;2667;5664;5665;5723;5724;9259;9260;9261;9262;10232;10233;10234;10235;10523;12425;12426;12427;12428	1225;1226;1729;1730;2532;5417;5418;5470;8968;8969;8970;8971;9873;9874;9875;10160;11972;11973;11974;11975	1226;1729;2532;5418;5470;8971;9874;10160;11972;11975
SPAC144.12|rki1|I|ribose	SPAC144.12|rki1|I|ribose	3	3	3	>SPAC144.12|rki1|I|ribose 5-phosphate isomerase Rki1 (predicted)	1	3	3	3	2	3	2	3	2	3	16.1	16.1	16.1	29.329	274	274	0	20.853	By MS/MS	By MS/MS	9.9	16.1	17452000	9109500	8342400	8874100	8144800	1	4	5				72	2125;3289;3467	True;True;True	2214;3426;3607	4717;7062;7063;7394;7395	4540;6779;7088;7089;7090	4540;6779;7090
SPAC144.14|klp8|I|kinesin-like	SPAC144.14|klp8|I|kinesin-like	2	2	2	>SPAC144.14|klp8|I|kinesin-like protein Klp8	1	2	2	2	2	2	2	2	2	2	4.5	4.5	4.5	57.253	511	511	0	11.596	By MS/MS	By MS/MS	4.5	4.5	4332600	759880	3572800	0	3387300	2	2	4				73	2456;3572	True;True	2553;3716	5400;5401;7597;7598	5166;5167;7278;7279	5167;7279
SPAC1486.01|sod2|I|mitochondrial	SPAC1486.01|sod2|I|mitochondrial	3	3	3	>SPAC1486.01|sod2|I|mitochondrial superoxide dismutase Sod2	1	3	3	3	3	3	3	3	3	3	13.8	13.8	13.8	24.346	218	218	0	20.439	By MS/MS	By MS/MS	13.8	13.8	10679000	3260700	7417900	5071100	5222500	3	3	6				74	264;2763;6314	True;True;True	277;2875;6608	637;638;5984;5985;13863;13864	619;620;5720;5721;13351;13352	620;5721;13351
SPAC1486.04c|alm1|I|medial	SPAC1486.04c|alm1|I|medial	12	12	12	>SPAC1486.04c|alm1|I|medial ring protein Alm1	1	12	12	12	8	9	8	9	8	9	8.5	8.5	8.5	197.86	1727	1727	0	78.972	By MS/MS	By MS/MS	5.7	6.4	47553000	20328000	27225000	21135000	25005000	5	6	11				75	899;1141;1269;2911;3688;4080;4142;4270;4565;4604;4962;6413	True;True;True;True;True;True;True;True;True;True;True;True	945;1198;1329;3029;3834;4273;4335;4476;4786;4826;5200;6708	1918;1919;2436;2688;2689;6283;6284;7816;9204;9315;9316;9596;10251;10252;10327;11126;14122	1833;2330;2551;2552;6014;6015;7473;8919;9023;9024;9287;9889;9956;10736;13631	1833;2330;2552;6014;7473;8919;9024;9287;9889;9956;10736;13631
SPAC14C4.11|vtc2|I|polyphosphate	SPAC14C4.11|vtc2|I|polyphosphate	7	7	7	>SPAC14C4.11|vtc2|I|polyphosphate synthetase, VTC complex subunit Vtc2/3 (predicted)	1	7	7	7	6	7	6	7	6	7	11.2	11.2	11.2	85.444	734	734	0	46.381	By MS/MS	By MS/MS	9.9	11.2	38085000	20404000	17682000	18639000	18528000	3	5	8				76	1110;1510;1621;2061;3299;4014;6264	True;True;True;True;True;True;True	1165;1578;1691;2148;3436;4204;6557	2366;2367;3190;3518;3519;4578;4579;7081;7082;9050;9051;9052;13767;13768	2262;2263;3042;3385;4407;6799;8771;8772;13258	2262;3042;3385;4407;6799;8772;13258
SPAC14C4.14|atp1|I|F1-ATPase	SPAC14C4.14|atp1|I|F1-ATPase	17	17	17	>SPAC14C4.14|atp1|I|F1-ATPase alpha subunit	1	17	17	17	16	16	16	16	16	16	33.2	33.2	33.2	58.587	536	536	0	127.05	By MS/MS	By MS/MS	31.2	31.9	227590000	110200000	117390000	103210000	114720000	17	14	31				77	30;217;922;1089;1215;1795;2022;2094;2138;4547;5155;5229;5312;5313;6035;6202;6212	True;True;True;True;True;True;True;True;True;True;True;True;True;True;True;True;True	30;228;968;1144;1273;1871;2108;2182;2227;4767;5398;5473;5559;5560;6319;6495;6505	54;55;541;542;1968;1969;1970;2322;2323;2581;2582;4038;4039;4492;4493;4644;4645;4737;4738;4739;4740;10215;11487;11628;11629;11793;11794;11795;11796;13328;13329;13657;13658;13676;13677	51;52;528;529;1880;1881;2219;2220;2453;2454;3893;3894;3895;4326;4470;4471;4556;4557;4558;4559;9857;11075;11204;11205;11358;11359;11360;12832;13149;13150;13173;13174	52;529;1880;2219;2453;3893;4326;4471;4559;9857;11075;11205;11358;11360;12832;13149;13173
SPAC1556.01c|rad50|I|DNA	SPAC1556.01c|rad50|I|DNA	2	2	2	>SPAC1556.01c|rad50|I|DNA repair protein Rad50	1	2	2	2	2	0	2	0	2	0	2.2	2.2	2.2	149.03	1285	1285	0	11.373	By MS/MS	By matching	2.2	0	3583900	3583900	0	3583900	0	2	0	2				78	701;4161	True;True	736;4356	1531;9353	1472;9059	1472;9059
SPAC1556.02c|sdh1|I|succinate	SPAC1556.02c|sdh1|I|succinate	9	9	9	>SPAC1556.02c|sdh1|I|succinate dehydrogenase Sdh1 (predicted)	1	9	9	9	8	9	8	9	8	9	20.4	20.4	20.4	70.465	641	641	0	100.24	By MS/MS	By MS/MS	15.9	20.4	141240000	50141000	91098000	64569000	71941000	5	9	14				79	47;463;1907;1968;2219;3217;3884;5415;6318	True;True;True;True;True;True;True;True;True	48;483;1990;2054;2310;3353;4043;5668;6612	93;1037;1038;4260;4261;4387;4388;4947;4948;6930;6931;8352;8353;11995;11996;13871;13872	87;1001;1002;4118;4119;4230;4231;4749;4750;6647;6648;8004;8005;11555;11556;13358;13359	87;1001;4118;4231;4750;6647;8005;11556;13359
SPAC1556.07|pmm1|I|phosphomannomutase	SPAC1556.07|pmm1|I|phosphomannomutase	1	1	1	>SPAC1556.07|pmm1|I|phosphomannomutase Pmm1	1	1	1	1	1	1	1	1	1	1	4.7	4.7	4.7	29.223	257	257	0.0030864	6.835	By MS/MS	By MS/MS	4.7	4.7	6561500	2079300	4482200	0	4249500	1	1	2				80	1732	TRUE	1806	3740;3741	3601;3602	3601
SPAC1565.05|utp8|I|t-UTP	SPAC1565.05|utp8|I|t-UTP	1	1	1	>SPAC1565.05|utp8|I|t-UTP complex subunit Utp8 (predicted)	1	1	1	1	1	1	1	1	1	1	1.2	1.2	1.2	86.679	773	773	0.0040201	6.4954	By MS/MS	By MS/MS	1.2	1.2	1353400	1353400	0	1353400	0	1	1	2				81	677	TRUE	710	1484;1485	1430;1431	1431
SPAC1565.06c|spg1|I|GTPase	SPAC1565.06c|spg1|I|GTPase	3	3	3	>SPAC1565.06c|spg1|I|GTPase Spg1	1	3	3	3	2	3	2	3	2	3	18.7	18.7	18.7	22.543	198	198	0	19.87	By MS/MS	By MS/MS	11.1	18.7	10663000	4486000	6177000	5044300	5298000	2	2	4				82	4256;4288;5335	True;True;True	4462;4494;5583	9566;9629;9630;11835;11836	9260;9315;9316;11395	9260;9316;11395
SPAC1565.08|cdc48|I|AAA	SPAC1565.08|cdc48|I|AAA	14	14	14	>SPAC1565.08|cdc48|I|AAA family ATPase involved in ubiquitin-mediated protein degradation Cdc48	1	14	14	14	12	12	12	12	12	12	22	22	22	90.124	815	815	0	119.76	By MS/MS	By MS/MS	18.3	17.2	137990000	74823000	63166000	71068000	62974000	11	10	21				83	467;1127;1210;1220;1287;1540;1788;1977;2221;2876;3130;6210;6245;6297	True;True;True;True;True;True;True;True;True;True;True;True;True;True	487;1182;1268;1278;1347;1609;1864;2063;2312;2992;3261;6503;6538;6591	1045;1046;1047;2401;2402;2570;2571;2591;2592;2593;2729;2730;3248;3249;4024;4405;4406;4951;4952;6203;6204;6749;13673;13734;13830;13831	1008;1009;1010;2295;2296;2444;2461;2462;2463;2585;2586;3093;3094;3881;4246;4752;4753;5932;5933;6472;13170;13226;13227;13319;13320	1008;2296;2444;2463;2585;3093;3881;4246;4753;5932;6472;13170;13227;13319
SPAC15A10.02|taf12|I|transcription	SPAC15A10.02|taf12|I|transcription	1	1	1	>SPAC15A10.02|taf12|I|transcription factor TFIID complex subunit A/ SAGA complex subunit Taf12	1	1	1	1	1	1	1	1	1	1	2.4	2.4	2.4	49.195	450	450	0.0030769	6.7659	By MS/MS	By matching	2.4	2.4	7771000	2432700	5338300	0	5061200	1	0	1				84	3546	TRUE	3690	7549;7550	7234	7234
SPAC15A10.04c|zpr1|I|EF-1	SPAC15A10.04c|zpr1|I|EF-1	2	2	2	>SPAC15A10.04c|zpr1|I|EF-1 alpha binding zinc finger protein Zpr1 (predicted)	1	2	2	2	2	1	2	1	2	1	7.6	7.6	7.6	51.376	459	459	0	15.117	By MS/MS	By MS/MS	7.6	2.2	4745100	3445500	1299600	3445500	0	1	1	2				85	3258;3426	True;True	3395;3565	7007;7313;7314	6721;7014;7015	6721;7014
SPAC15A10.11|ubr11|I|UBR	SPAC15A10.11|ubr11|I|UBR	2	2	2	>SPAC15A10.11|ubr11|I|UBR ubiquitin-protein ligase E3 Ubr11	1	2	2	2	1	1	1	1	1	1	1	1	1	234.04	2052	2052	0	11.435	By MS/MS	By MS/MS	0.5	0.5	0	0	0	0	0	1	1	2				86	2733;4957	True;True	2845;5195	5937;11115	5678;10722	5678;10722
SPAC15E1.03|rpl42|I|60S	SPAC15E1.03|rpl42|I|60S	1	1	1	>SPAC15E1.03|rpl42|I|60S ribosomal protein L36/L42	1	1	1	1	1	1	1	1	1	1	7.5	7.5	7.5	12.205	106	106	0.0086538	6.1505	By MS/MS	By MS/MS	7.5	7.5	4011800	1935800	2076000	0	1968200	0	0	0				87	2072	TRUE	2159	4600;4601	4427;4428	4428
SPAC15F9.02|seh1|I|Seh1-associated	SPAC15F9.02|seh1|I|Seh1-associated	3	3	3	>SPAC15F9.02|seh1|I|Seh1-associated complex subunit Seh1	1	3	3	3	2	3	2	3	2	3	11.5	11.5	11.5	38.564	339	339	0	21.44	By MS/MS	By MS/MS	8	11.5	15551000	5572500	9979000	7038700	7994800	1	2	3				88	452;5732;5786	True;True;True	472;6007;6062	1004;1005;12718;12834;12835	975;12255;12363;12364	975;12255;12364
SPAC1635.01|SPAC1635.01|I|mitochondrial	SPAC1635.01|SPAC1635.01|I|mitochondrial	3	3	3	>SPAC1635.01|SPAC1635.01|I|mitochondrial outer membrane voltage-dependent anion-selective channel (predicted)	1	3	3	3	2	2	2	2	2	2	22	22	22	29.653	282	282	0	28.443	By MS/MS	By MS/MS	12.8	13.5	59991000	12866000	47125000	0	44679000	2	3	5				89	647;1445;5896	True;True;True	679;1511;6176	1421;1422;3066;13047	1370;1371;2924;12559;12560	1370;2924;12560
SPAC1639.01c|SPAC1639.01c|I|GNS1/SUR4	SPAC1639.01c|SPAC1639.01c|I|GNS1/SUR4	1	1	1	>SPAC1639.01c|SPAC1639.01c|I|GNS1/SUR4 family protein (predicted)	1	1	1	1	1	1	1	1	1	1	3	3	3	41.54	365	365	0.005005	6.4349	By MS/MS	By matching	3	3	13684000	6328200	7356100	0	6974200	1	0	1				90	4702	TRUE	4927	10602;10603	10234	10234
SPAC1687.03c|rfc4|I|DNA	SPAC1687.03c|rfc4|I|DNA	2	2	2	>SPAC1687.03c|rfc4|I|DNA replication factor C complex subunit Rfc4 (predicted)	1	2	2	2	1	2	1	2	1	2	7.9	7.9	7.9	37.654	342	342	0	14.466	By MS/MS	By MS/MS	2.6	7.9	3630200	678780	2951400	0	2798200	1	2	3				91	3695;6599	True;True	3841;6902	7829;7830;14482	7485;7486;13967	7485;13967
SPAC1687.10|mcp1|I|microtubule	SPAC1687.10|mcp1|I|microtubule	2	2	2	>SPAC1687.10|mcp1|I|microtubule binding protein Mcp1	1	2	2	2	2	1	2	1	2	1	4.4	4.4	4.4	75.944	661	661	0	13.496	By MS/MS	By MS/MS	4.4	2.4	5304400	3302700	2001700	0	1897800	1	1	2				92	2708;6034	True;True	2820;6318	5896;5897;13327	5637;5638;12831	5638;12831
SPAC1687.15|gsk3|I|serine/threonine	SPAC1687.15|gsk3|I|serine/threonine	3	3	3	>SPAC1687.15|gsk3|I|serine/threonine protein kinase Gsk3	1	3	3	3	3	3	3	3	3	3	9.6	9.6	9.6	44.165	387	387	0	20.207	By MS/MS	By MS/MS	9.6	9.6	22539000	11086000	11453000	10528000	11417000	2	3	5				93	613;3844;5263	True;True;True	641;3993;5508	1337;1338;8139;8140;11691;11692	1289;7779;7780;11264;11265	1289;7779;11264
SPAC1687.21|SPAC1687.21|I|phosphoglycerate	SPAC1687.21|SPAC1687.21|I|phosphoglycerate	1	1	1	>SPAC1687.21|SPAC1687.21|I|phosphoglycerate mutase family (predicted)	1	1	1	1	1	1	1	1	1	1	5.7	5.7	5.7	23.698	209	209	0.003096	6.8809	By matching	By MS/MS	5.7	5.7	4407300	2925100	1482200	0	1405300	0	1	1				94	1628	TRUE	1698	3531;3532	3397	3397
SPAC1687.22c|puf3|I|pumilio	SPAC1687.22c|puf3|I|pumilio	1	1	1	>SPAC1687.22c|puf3|I|pumilio family RNA-binding protein Puf3 (predicted)	1	1	1	1	0	1	0	1	0	1	2.2	2.2	2.2	81.068	732	732	0.0022247	7.6607	By matching	By MS/MS	0	2.2	2853300	0	2853300	0	2705200	0	1	1				95	3726	TRUE	3873	7891	7545	7545
SPAC16A10.03c|SPAC16A10.03c|I|ubiquitin-protein	SPAC16A10.03c|SPAC16A10.03c|I|ubiquitin-protein	1	1	1	>SPAC16A10.03c|SPAC16A10.03c|I|ubiquitin-protein ligase E3 Pep5/Vps11-like (predicted)	1	1	1	1	1	1	1	1	1	1	2.2	2.2	2.2	97.485	847	847	0.0030738	6.735	By matching	By MS/MS	2.2	2.2	2446300	894670	1551600	0	1471100	0	1	1				96	990	TRUE	1040	2108;2109	2019	2019
SPAC16C9.06c|upf1|I|ATP-dependent	SPAC16C9.06c|upf1|I|ATP-dependent	4	4	4	>SPAC16C9.06c|upf1|I|ATP-dependent RNA helicase Upf1	1	4	4	4	3	4	3	4	3	4	4	4	4	104.53	925	925	0	25.752	By MS/MS	By MS/MS	3	4	135160000	52154000	83005000	53464000	47072000	4	7	11				97	3160;3313;4287;6629	True;True;True;True	3291;3451;4493;6933	6799;6800;6801;6802;7104;7105;9627;9628;14550	6517;6518;6519;6520;6521;6522;6819;6820;6821;9314;14037	6521;6821;9314;14037
SPAC16E8.01|shd1|I|cytoskeletal	SPAC16E8.01|shd1|I|cytoskeletal	4	4	4	>SPAC16E8.01|shd1|I|cytoskeletal protein binding protein Sla1 family, Shd1 (predicted)	1	4	4	4	2	4	2	4	2	4	4.1	4.1	4.1	154.63	1420	1420	0	30.365	By MS/MS	By MS/MS	2.6	4.1	25616000	9065400	16551000	12460000	12297000	1	4	5				98	575;999;2739;3898	True;True;True;True	599;1049;2851;4060	1250;2124;2125;5945;8386;8387	1200;2035;5685;8030;8031	1200;2035;5685;8030	40	512
SPAC16E8.09|scd1|I|RhoGEF	SPAC16E8.09|scd1|I|RhoGEF	1	1	1	>SPAC16E8.09|scd1|I|RhoGEF Scd1	1	1	1	1	0	1	0	1	0	1	1.7	1.7	1.7	99.101	872	872	0.0049652	6.3301	By matching	By MS/MS	0	1.7	3430600	0	3430600	0	3252500	0	1	1				99	2730	TRUE	2842	5932	5673	5673
SPAC16E8.15|tif45|I|translation	SPAC16E8.15|tif45|I|translation	2	2	2	>SPAC16E8.15|tif45|I|translation initiation factor eIF4E, 4F complex subunit	1	2	2	2	2	2	2	2	2	2	9.2	9.2	9.2	24.958	218	218	0	13.156	By MS/MS	By MS/MS	9.2	9.2	5691700	3388300	2303400	0	2183800	2	2	4				100	997;4622	True;True	1047;4845	2121;2122;10446;10447	2032;2033;10085;10086	2032;10086
SPAC1751.03|tif313|I|translation	SPAC1751.03|tif313|I|translation	4	4	4	>SPAC1751.03|tif313|I|translation initiation factor eIF3m	1	4	4	4	4	4	4	4	4	4	10.7	10.7	10.7	45.085	402	402	0	29.222	By MS/MS	By MS/MS	10.7	10.7	27703000	5495000	22208000	0	21055000	3	3	6				101	1240;2066;3640;6617	True;True;True;True	1299;2153;3785;6921	2635;2636;4587;4588;7724;7725;14516;14517	2500;2501;4415;7387;7388;13999;14000	2501;4415;7388;14000
SPAC1782.11|met14|I|adenylyl-sulfate	SPAC1782.11|met14|I|adenylyl-sulfate	1	1	1	>SPAC1782.11|met14|I|adenylyl-sulfate kinase (predicted)	1	1	1	1	1	1	1	1	1	1	9.4	9.4	9.4	22.669	202	202	0.002139	7.2545	By matching	By MS/MS	9.4	9.4	12287000	6052600	6234300	0	5910600	0	1	1				102	1366	TRUE	1428	2887;2888	2748	2748
SPAC1783.07c|pap1|I|transcription	SPAC1783.07c|pap1|I|transcription	1	1	1	>SPAC1783.07c|pap1|I|transcription factor Pap1/Caf3	1	1	1	1	1	1	1	1	1	1	2.5	2.5	2.5	61.531	552	552	0.0023095	8.3998	By MS/MS	By MS/MS	2.5	2.5	3366600	1548800	1817800	0	1723500	1	1	2				103	1086	TRUE	1141	2317;2318	2215;2216	2216
SPAC17A2.04c|cns1|I|HSP	SPAC17A2.04c|cns1|I|HSP	5	5	5	>SPAC17A2.04c|cns1|I|HSP chaperone complex subunit Cns1 (predicted)	1	5	5	5	5	3	5	3	5	3	20.9	20.9	20.9	40.531	358	358	0	31.281	By MS/MS	By MS/MS	20.9	11.7	18475000	13850000	4625600	11562000	6672700	6	2	8				104	1;277;3093;5649;5682	True;True;True;True;True	1;290;3224;5920;5954	1;659;660;6679;6680;12547;12617;12618	1;643;644;6405;6406;12086;12087;12153;12154	1;644;6406;12087;12153
SPAC17A2.05|osm1|I|fumarate	SPAC17A2.05|osm1|I|fumarate	1	1	1	>SPAC17A2.05|osm1|I|fumarate reductase Osm1 (predicted)	1	1	1	1	1	1	1	1	1	1	2.1	2.1	2.1	55.483	513	513	0.0022936	8.2009	By MS/MS	By matching	2.1	2.1	3484300	1738000	1746300	0	1655600	0	0	0				105	5176	TRUE	5419	11528;11529	11115	11115
SPAC17A2.13c|rad25|I|14-3-3	SPAC17A2.13c|rad25|I|14-3-3	10	8	8	>SPAC17A2.13c|rad25|I|14-3-3 protein Rad25	1	10	8	8	9	10	7	8	7	8	52.6	49.6	49.6	30.369	270	270	0	106.35	By MS/MS	By MS/MS	48.1	52.6	177060000	101330000	75725000	102780000	70341000	6	7	13				106	34;782;812;879;941;2365;2506;4148;4610;6513	True;True;False;True;True;True;True;False;True;True	34;820;850;851;924;988;2460;2605;4341;4832;6811	62;63;1690;1691;1739;1740;1741;1742;1743;1877;1878;2007;2008;5228;5229;5493;5494;9327;9328;10423;10424;14301	59;60;1621;1670;1671;1672;1673;1674;1793;1794;1916;1917;5000;5001;5255;5256;9034;9035;10062;10063;13797	60;1621;1674;1793;1917;5001;5255;9034;10062;13797	41	222
SPAPB8E5.06c|rpl302|I|60S;SPAC17A5.03|rpl301|I|60S	SPAPB8E5.06c|rpl302|I|60S;SPAC17A5.03|rpl301|I|60S	8;8	8;8	8;8	>SPAPB8E5.06c|rpl302|I|60S ribosomal protein L3;>SPAC17A5.03|rpl301|I|60S ribosomal protein L3	2	8	8	8	8	8	8	8	8	8	25.3	25.3	25.3	43.816	388	388;388	0	56.661	By MS/MS	By MS/MS	25.3	25.3	90255000	39054000	51201000	42688000	38551000	5	7	12				107	180;625;2754;5024;5063;5197;5723;5977	True;True;True;True;True;True;True;True	190;656;2866;5263;5303;5440;5441;5998;6260	473;474;1370;1371;5970;5971;11240;11241;11317;11318;11563;11564;11565;11566;12699;12700;13225;13226;13227	463;464;1322;5707;10842;10911;10912;11144;11145;12238;12728;12729	463;1322;5707;10842;10912;11145;12238;12728	42	214
SPAC17A5.06|ptr8|I|transcription	SPAC17A5.06|ptr8|I|transcription	1	1	1	>SPAC17A5.06|ptr8|I|transcription factor TFIIH complex ERCC-3 subunit Ptr8	1	1	1	1	0	1	0	1	0	1	1.5	1.5	1.5	91.344	804	804	0.0049603	6.3288	By matching	By MS/MS	0	1.5	0	0	0	0	0	0	1	1				108	3424	TRUE	3563	7308	7010	7010
SPAC17A5.14|exo2|I|exonuclease	SPAC17A5.14|exo2|I|exonuclease	4	4	4	>SPAC17A5.14|exo2|I|exonuclease II Exo2	1	4	4	4	4	3	4	3	4	3	3	3	3	152.59	1328	1328	0	26.597	By MS/MS	By MS/MS	3	2.2	19307000	9054100	10253000	7715800	11059000	4	2	6				109	1785;2280;2420;3433	True;True;True;True	1861;2372;2517;3572	4018;4019;5064;5065;5333;5334;7327	3875;3876;4847;4848;5096;7028	3876;4848;5096;7028
SPAC17A5.15c|gus1|I|cytoplasmic	SPAC17A5.15c|gus1|I|cytoplasmic	8	8	8	>SPAC17A5.15c|gus1|I|cytoplasmic glutamate-tRNA ligase gus1 (predicted)	1	8	8	8	6	8	6	8	6	8	16.9	16.9	16.9	80.749	716	716	0	58.324	By MS/MS	By MS/MS	12.7	16.9	59535000	25076000	34458000	26151000	31595000	6	6	12				110	22;715;1860;2875;2888;3060;3190;5430	True;True;True;True;True;True;True;True	22;750;1939;2991;3005;3189;3324;5684	40;41;1553;1554;4173;6201;6202;6227;6228;6617;6876;6877;12024;12025	38;39;1489;1490;4020;5930;5931;5954;5955;6346;6597;6598;11581;11582	38;1490;4020;5930;5955;6346;6598;11581
SPAC17A5.16|ftp105|I|Ubp5	SPAC17A5.16|ftp105|I|Ubp5	2	2	2	>SPAC17A5.16|ftp105|I|Ubp5 interacting protein Ftp105	1	2	2	2	2	2	2	2	2	2	3.2	3.2	3.2	104.83	925	925	0	13.671	By MS/MS	By MS/MS	3.2	3.2	17372000	8825000	8547100	8078100	8850300	2	1	3				111	453;5529	True;True	473;5790	1006;1007;12265;12266	976;11813;11814	976;11814
SPAC17C9.03|tif471|I|translation	SPAC17C9.03|tif471|I|translation	12	12	12	>SPAC17C9.03|tif471|I|translation initiation factor eIF4G	1	12	12	12	11	12	11	12	11	12	12	12	12	154.03	1403	1403	0	88.677	By MS/MS	By MS/MS	11.9	12	105790000	51773000	54015000	48220000	54764000	10	11	21				112	716;747;1404;1712;2800;3396;4617;5149;5223;5447;5448;6612	True;True;True;True;True;True;True;True;True;True;True;True	751;782;1469;1786;2913;3535;4839;5392;5467;5701;5702;6916	1555;1556;1619;1620;2992;2993;3703;3704;6052;6053;7257;7258;10435;10436;11478;11479;11612;11613;12061;12062;12063;14507;14508	1491;1492;1554;1555;2850;2851;3565;3566;5789;5790;6963;6964;10074;10075;11066;11067;11190;11191;11618;11619;11620;13992	1492;1555;2851;3565;5789;6963;10074;11066;11191;11618;11620;13992
SPAC17C9.09c|tim13|I|TIM22	SPAC17C9.09c|tim13|I|TIM22	2	2	2	>SPAC17C9.09c|tim13|I|TIM22 inner membrane protein import complex subunit Tim13 (predicted)	1	2	2	2	2	2	2	2	2	2	25.3	25.3	25.3	10.742	95	95	0	22.016	By MS/MS	By MS/MS	25.3	25.3	37555000	18183000	19372000	12807000	13963000	2	1	3				113	4408;6554	True;True	4622;6854;6855	9908;9909;14380;14381;14382;14383	9581;9582;13873;13874	9581;13874	43	73
SPAC17D4.01|pex7|I|peroxin-7	SPAC17D4.01|pex7|I|peroxin-7	7	7	7	>SPAC17D4.01|pex7|I|peroxin-7 (predicted)	1	7	7	7	4	6	4	6	4	6	29.9	29.9	29.9	34.588	308	308	0	52.657	By MS/MS	By MS/MS	14.3	26	34957000	14905000	20052000	16753000	17163000	3	5	8				114	1794;2402;2812;2981;3179;3843;5173	True;True;True;True;True;True;True	1870;2497;2925;3102;3313;3992;5416	4037;5297;6074;6437;6438;6858;6859;8137;8138;11524	3891;3892;5061;5809;6162;6580;6581;7777;7778;11111	3892;5061;5809;6162;6580;7778;11111
SPAC17D4.03c|cis4|I|cation	SPAC17D4.03c|cis4|I|cation	5	5	5	>SPAC17D4.03c|cis4|I|cation diffusion family zinc transmembrane transporter Cis4	1	5	5	5	5	3	5	3	5	3	7.5	7.5	7.5	82.739	732	732	0	32.728	By MS/MS	By MS/MS	7.5	4.4	12545000	6341500	6203200	6498800	5723900	5	3	8				115	1305;1506;2674;3637;4149	True;True;True;True;True	1365;1574;2781;3782;4342	2762;2763;3183;5821;5822;7720;7721;9329	2616;3035;5559;5560;5561;7383;7384;9036	2616;3035;5561;7384;9036	44	281
SPAC17G6.08|pep7|I|prevacuole/endosomal	SPAC17G6.08|pep7|I|prevacuole/endosomal	1	1	1	>SPAC17G6.08|pep7|I|prevacuole/endosomal FYVE tethering component Pep7 (predicted)	1	1	1	1	1	1	1	1	1	1	1.7	1.7	1.7	62.434	536	536	0.0021008	7.1007	By matching	By MS/MS	1.7	1.7	2419400	1317500	1101900	0	1044700	0	1	1				116	2457	TRUE	2554	5402;5403	5168	5168
SPAC17G6.13|slt1|I|Schizosaccharomyces	SPAC17G6.13|slt1|I|Schizosaccharomyces	16	16	16	>SPAC17G6.13|slt1|I|Schizosaccharomyces specific protein Slt1	1	16	16	16	16	13	16	13	16	13	43.2	43.2	43.2	49.136	433	433	0	323.31	By MS/MS	By MS/MS	43.2	35.8	1967800000	1375500000	592300000	1089700000	644320000	16	12	28				117	126;222;475;1187;1654;2190;3565;4404;4405;4414;4415;4560;4647;4663;5372;5632	True;True;True;True;True;True;True;True;True;True;True;True;True;True;True;True	134;233;495;496;1244;1724;2281;3709;4618;4619;4628;4629;4781;4871;4888;5623;5901	372;373;550;1062;1063;1064;1065;2517;3577;3578;4883;4884;7583;7584;9899;9900;9901;9902;9920;9921;9922;9923;9924;9925;10243;10244;10495;10496;10530;10531;11906;11907;12517	364;365;537;1025;1026;1027;1028;2400;3437;3438;3439;4693;4694;7266;7267;9574;9575;9576;9577;9591;9592;9593;9594;9595;9882;9883;10135;10167;11463;12060	365;537;1025;2400;3438;4693;7266;9575;9576;9592;9595;9882;10135;10167;11463;12060	45;46	25;277
SPAC17G6.14c|uap56|I|TREX	SPAC17G6.14c|uap56|I|TREX	3	3	3	>SPAC17G6.14c|uap56|I|TREX complex subunit, ATP-dependent RNA helicase Uap56	1	3	3	3	3	3	3	3	3	3	9	9	9	49.231	434	434	0	18.835	By MS/MS	By MS/MS	9	9	16734000	9115900	7618200	9135300	7203300	1	3	4				118	645;2321;6074	True;True;True	676;2415;6364	1415;1416;5142;5143;13411;13412	1365;4918;4919;12911	1365;4918;12911
SPAC17G8.01c|trl1|I|tRNA	SPAC17G8.01c|trl1|I|tRNA	4	4	4	>SPAC17G8.01c|trl1|I|tRNA ligase Trl1 (predicted)	1	4	4	4	3	2	3	2	3	2	5	5	5	90.342	787	787	0	67.038	By MS/MS	By MS/MS	3.9	1.9	7223600	5270500	1953100	5270500	0	3	2	5				119	128;1594;5213;6439	True;True;True;True	136;1664;5457;6734	376;3465;3466;11594;14168	368;3334;3335;11173;13673	368;3334;11173;13673
SPAC17G8.05|med20|I|mediator	SPAC17G8.05|med20|I|mediator	1	1	1	>SPAC17G8.05|med20|I|mediator complex subunit Med20	1	1	1	1	1	1	1	1	1	1	3.6	3.6	3.6	22.35	193	193	0.0040161	6.4915	By MS/MS	By MS/MS	3.6	3.6	2390800	838890	1551900	0	1471300	1	1	2				120	3423	TRUE	3562	7306;7307	7008;7009	7008
SPAC17G8.06c|SPAC17G8.06c|I|dihydroxy-acid	SPAC17G8.06c|SPAC17G8.06c|I|dihydroxy-acid	2	2	2	>SPAC17G8.06c|SPAC17G8.06c|I|dihydroxy-acid dehydratase (predicted)	1	2	2	2	1	2	1	2	1	2	3.2	3.2	3.2	63.926	598	598	0	11.953	By matching	By MS/MS	1.8	3.2	2097500	686980	1410500	0	1337300	0	1	1				121	1914;6594	True;True	1998;6897	4276;4277;14470	4132;13958	4132;13958
SPAC17H9.04c|nrp1|I|RNA-binding	SPAC17H9.04c|nrp1|I|RNA-binding	5	5	5	>SPAC17H9.04c|nrp1|I|RNA-binding protein	1	5	5	5	4	4	4	4	4	4	9.1	9.1	9.1	66.396	604	604	0	35.078	By MS/MS	By MS/MS	7.6	7.5	43107000	17703000	25405000	20864000	20924000	1	3	4				122	226;426;3065;3910;4847	True;True;True;True;True	237;445;3194;4077;5082	557;558;951;952;6625;6626;8424;10905	543;920;921;6353;8066;10529	543;920;6353;8066;10529
SPAC17H9.12c|SPAC17H9.12c|I|mitochondrial	SPAC17H9.12c|SPAC17H9.12c|I|mitochondrial	1	1	1	>SPAC17H9.12c|SPAC17H9.12c|I|mitochondrial cytochrome c-heme linkage protein Cyc2 (predicted)	1	1	1	1	0	1	0	1	0	1	3.8	3.8	3.8	29.375	266	266	0.0068027	6.2335	By matching	By MS/MS	0	3.8	0	0	0	0	0	0	1	1				123	1836	TRUE	1913	4127	3977	3977
SPAC17H9.13c|SPAC17H9.13c|I|glutamate	SPAC17H9.13c|SPAC17H9.13c|I|glutamate	9	9	9	>SPAC17H9.13c|SPAC17H9.13c|I|glutamate 5-kinase (predicted)	1	9	9	9	8	9	8	9	8	9	23.4	23.4	23.4	43.933	402	402	0	116.4	By MS/MS	By MS/MS	21.1	23.4	158350000	69954000	88392000	65531000	88226000	8	8	16				124	175;359;1643;2086;3340;3611;4557;4917;5720	True;True;True;True;True;True;True;True;True	185;375;1713;2173;3478;3755;4778;5155;5995	464;465;823;824;3557;3558;4628;4629;7154;7155;7672;7673;10236;10237;11036;12693;12694	454;455;797;798;3418;3419;4454;4455;6865;6866;7340;7341;9876;9877;10647;12231;12232	454;797;3418;4454;6866;7340;9877;10647;12232
SPAC17H9.14c|pdi2|I|protein	SPAC17H9.14c|pdi2|I|protein	10	10	10	>SPAC17H9.14c|pdi2|I|protein disulfide isomerase	1	10	10	10	9	9	9	9	9	9	35.4	35.4	35.4	40.691	359	359	0	107.46	By MS/MS	By MS/MS	30.6	31.8	130450000	67556000	62891000	70443000	56739000	6	9	15				125	629;835;2620;2660;2797;3067;3504;4496;4994;5100	True;True;True;True;True;True;True;True;True;True	660;877;2725;2766;2910;3196;3646;4713;5233;5340	1376;1790;1791;5717;5718;5788;5789;6047;6629;6630;7465;7466;10093;10094;11186;11187;11379;11380	1329;1714;1715;5464;5465;5530;5785;6356;7153;7154;9745;10792;10793;10971;10972	1329;1715;5465;5530;5785;6356;7154;9745;10792;10971
SPAC1805.11c|rps2602|I|40S;SPAC806.03c|rps2601|I|40S	SPAC1805.11c|rps2602|I|40S;SPAC806.03c|rps2601|I|40S	2;1	2;1	2;1	>SPAC1805.11c|rps2602|I|40S ribosomal protein S26 (predicted);>SPAC806.03c|rps2601|I|40S ribosomal protein S26 (predicted)	2	2	2	2	2	2	2	2	2	2	20.2	20.2	20.2	13.862	119	119;120	0	15.585	By MS/MS	By MS/MS	20.2	20.2	21035000	9998600	11036000	9808500	10653000	2	2	4				126	757;4182	True;True	792;4380	1640;1641;9395;9396	1573;1574;9100;9101	1574;9101
SPAC1805.13|rpl14|I|60S	SPAC1805.13|rpl14|I|60S	3	3	3	>SPAC1805.13|rpl14|I|60S ribosomal protein L14 (predicted)	1	3	3	3	3	2	3	2	3	2	21.6	21.6	21.6	15.21	134	134	0	19.995	By MS/MS	By MS/MS	21.6	15.7	16102000	10787000	5314700	8195100	7630800	3	2	5				127	1168;3085;5131	True;True;True	1225;3215;5373	2485;2486;6664;6665;11443	2372;2373;6390;6391;11037	2372;6390;11037
SPAC1805.16c|SPAC1805.16c|I|purine	SPAC1805.16c|SPAC1805.16c|I|purine	6	6	6	>SPAC1805.16c|SPAC1805.16c|I|purine nucleoside phosphorylase (predicted)	1	6	6	6	5	5	5	5	5	5	23.8	23.8	23.8	34.238	315	315	0	40.077	By MS/MS	By MS/MS	18.4	20.6	30031000	11643000	18387000	14499000	14577000	3	6	9				128	1638;1886;3840;5330;6102;6479	True;True;True;True;True;True	1708;1968;3989;5577;6392;6777	3547;3548;4224;4225;8131;8132;11826;13463;13464;14249	3409;3410;4080;4081;7771;7772;11385;12961;13746;13747	3409;4080;7772;11385;12961;13746
SPAC1805.17|crm1|I|importin	SPAC1805.17|crm1|I|importin	17	17	17	>SPAC1805.17|crm1|I|importin family nuclear export receptor Crm1	1	17	17	17	4	17	4	17	4	17	17.9	17.9	17.9	123.57	1078	1078	0	120.52	By MS/MS	By MS/MS	3	17.9	132310000	9516800	122790000	12643000	113290000	4	18	22				129	9;476;525;529;643;648;956;1064;1455;1480;2083;2526;3593;3748;4325;4416;6484	True;True;True;True;True;True;True;True;True;True;True;True;True;True;True;True;True	9;497;548;552;674;680;1004;1117;1521;1548;2170;2626;3737;3895;4535;4630;6782	16;17;1066;1067;1162;1167;1410;1423;2040;2273;2274;3087;3134;3135;4623;5539;7638;7930;9732;9926;14256	15;16;1029;1030;1119;1124;1360;1372;1954;2173;2174;2943;2989;2990;4449;5299;7312;7583;9421;9596;13754;13755	15;1030;1119;1124;1360;1372;1954;2174;2943;2990;4449;5299;7312;7583;9421;9596;13755
SPAC1834.01|sup45|I|translation	SPAC1834.01|sup45|I|translation	5	5	5	>SPAC1834.01|sup45|I|translation release factor eRF1	1	5	5	5	4	5	4	5	4	5	12.7	12.7	12.7	48.803	433	433	0	39.262	By MS/MS	By MS/MS	11.1	12.7	78034000	35965000	42069000	36487000	39363000	4	6	10				130	1393;1585;1702;3677;5373	True;True;True;True;True	1458;1655;1775;1776;3823;5624	2968;2969;3449;3681;3682;3683;3684;7795;7796;11908;11909	2824;3317;3544;3545;3546;3547;7454;7455;11464;11465	2824;3317;3544;7454;11465	47	412
SPAC1834.02|aro1|I|pentafunctional	SPAC1834.02|aro1|I|pentafunctional	15	15	15	>SPAC1834.02|aro1|I|pentafunctional aromatic polypeptide Aro1 (predicted)	1	15	15	15	9	13	9	13	9	13	10.6	10.6	10.6	173.78	1573	1573	0	97.105	By MS/MS	By MS/MS	6	9.2	50503000	17217000	33286000	21906000	26869000	4	12	16				131	19;96;976;1471;1806;2043;2498;2745;3324;3702;3995;4146;4616;5199;6135	True;True;True;True;True;True;True;True;True;True;True;True;True;True;True	19;102;1024;1538;1882;2130;2597;2857;3462;3848;4184;4339;4838;5443;6425	35;36;201;2077;2078;3117;4067;4068;4543;4544;5478;5955;7126;7842;9012;9323;9324;10433;10434;11569;11570;13525	34;191;1989;1990;2973;3921;4372;5242;5692;6839;7497;8735;9030;9031;10072;10073;11148;11149;13022	34;191;1989;2973;3921;4372;5242;5692;6839;7497;8735;9030;10072;11149;13022	48	871
SPBC8D2.03c|hhf2|II|histone;SPBC1105.12|hhf3|II|histone;SPAC1834.03c|hhf1|I|histone	SPBC8D2.03c|hhf2|II|histone;SPBC1105.12|hhf3|II|histone;SPAC1834.03c|hhf1|I|histone	1;1;1	1;1;1	1;1;1	>SPBC8D2.03c|hhf2|II|histone H4 h4.2;>SPBC1105.12|hhf3|II|histone H4 h4.3;>SPAC1834.03c|hhf1|I|histone H4 h4.1	3	1	1	1	1	1	1	1	1	1	7.8	7.8	7.8	11.423	103	103;103;103	0.0030832	6.8269	By MS/MS	By MS/MS	7.8	7.8	5187400	2005300	3182100	0	3016900	1	1	2				132	3193	TRUE	3327	6882;6883	6603;6604	6604
SPAC1834.06c|pmo25|I|mo25	SPAC1834.06c|pmo25|I|mo25	1	1	1	>SPAC1834.06c|pmo25|I|mo25 family protein Pmo25	1	1	1	1	1	1	1	1	1	1	2.7	2.7	2.7	38.521	329	329	0.0021436	7.3001	By MS/MS	By MS/MS	2.7	2.7	3478500	1715000	1763500	0	1671900	1	0	1				133	3392	TRUE	3531	7250;7251	6956;6957	6956
SPAC1834.08|mak1|I|histidine	SPAC1834.08|mak1|I|histidine	14	14	14	>SPAC1834.08|mak1|I|histidine kinase Mak1	1	14	14	14	14	13	14	13	14	13	10.1	10.1	10.1	184.58	1639	1639	0	109.95	By MS/MS	By MS/MS	10.1	9.6	89324000	35945000	53379000	39492000	47061000	11	8	19				134	152;396;756;1349;1411;1616;2462;4605;5026;5039;5089;5420;5854;5946	True;True;True;True;True;True;True;True;True;True;True;True;True;True	162;414;791;1411;1476;1686;2560;4827;5265;5279;5329;5673;6134;6227	420;421;422;423;893;894;1638;1639;2857;2858;3005;3006;3508;3509;5411;5412;10328;10329;11243;11244;11270;11271;11360;11361;12005;12971;12972;13148;13149	411;412;413;865;1572;2716;2862;2863;3375;3376;5176;5177;9957;9958;10844;10845;10871;10872;10953;10954;11563;12489;12490;12655;12656	411;865;1572;2716;2863;3376;5176;9957;10845;10871;10954;11563;12489;12655
SPAC1834.11c|sec18|I|secretory	SPAC1834.11c|sec18|I|secretory	5	4	4	>SPAC1834.11c|sec18|I|secretory pathway protein Sec18 (predicted)	1	5	4	4	5	4	4	3	4	3	7.4	5.9	5.9	87.553	792	792	0	36.51	By MS/MS	By MS/MS	7.4	6.2	14686000	8918500	5767900	7755600	5152400	5	3	8				135	1548;1787;2112;2481;5109	True;False;True;True;True	1617;1618;1863;2201;2579;5349	3261;3262;3263;3264;4022;4023;4690;5445;5446;11400;11401	3106;3107;3108;3879;3880;4514;5211;5212;10992;10993	3107;3880;4514;5212;10993	49	676
SPAC1851.03|ckb1|I|CK2	SPAC1851.03|ckb1|I|CK2	2	2	2	>SPAC1851.03|ckb1|I|CK2 family regulatory subunit Ckb1	1	2	2	2	2	2	2	2	2	2	7.8	7.8	7.8	26.677	231	231	0	13.291	By MS/MS	By MS/MS	7.8	7.8	8197900	4388000	3809900	4168600	3831500	1	2	3				136	2179;5925	True;True	2269;6206	4828;4829;13106;13107	4641;4642;12617	4642;12617
SPAC18B11.10|tup11|I|transcriptional	SPAC18B11.10|tup11|I|transcriptional	3	3	3	>SPAC18B11.10|tup11|I|transcriptional corepressor Tup11	1	3	3	3	3	0	3	0	3	0	8.1	8.1	8.1	67.33	614	614	0	22.362	By MS/MS	By matching	8.1	0	0	0	0	0	0	3	0	3				137	1067;1159;4825	True;True;True	1120;1216;5059	2279;2467;10862	2179;2358;10491	2179;2358;10491
SPAC18G6.04c|shm2|I|serine	SPAC18G6.04c|shm2|I|serine	4	3	3	>SPAC18G6.04c|shm2|I|serine hydroxymethyltransferase Shm2 (predicted)	1	4	3	3	4	3	3	2	3	2	9	7.2	7.2	53.978	488	488	0	19.829	By MS/MS	By MS/MS	9	6.4	13424000	8707900	4716400	7541100	5638400	3	1	4				138	2539;5961;6214;6608	True;True;True;False	2639;6244;6507;6912	5559;5560;13195;13196;13680;14500;14501	5319;12701;12702;13177;13985;13986	5319;12702;13177;13985
SPAC18G6.05c|gcn1|I|translation	SPAC18G6.05c|gcn1|I|translation	12	12	12	>SPAC18G6.05c|gcn1|I|translation elongation regulator Gcn1 (predicted)	1	12	12	12	9	9	9	9	9	9	6	6	6	297.33	2670	2670	0	96.935	By MS/MS	By MS/MS	4.8	4.6	39854000	22425000	17429000	21322000	17628000	5	8	13				139	1179;2466;3849;4016;4118;4747;4765;5013;5239;5586;5801;6077	True;True;True;True;True;True;True;True;True;True;True;True	1236;2564;3998;4206;4311;4973;4992;5252;5483;5852;6079;6367	2504;5418;5419;8150;9055;9271;9272;10691;10692;10731;10732;11220;11221;11645;12430;12865;12866;13417	2390;5184;5185;7789;8775;8980;8981;10315;10316;10358;10359;10824;11221;11977;12391;12916	2390;5185;7789;8775;8981;10315;10358;10824;11221;11977;12391;12916
SPAC18G6.14c|rps7|I|40S	SPAC18G6.14c|rps7|I|40S	5	5	5	>SPAC18G6.14c|rps7|I|40S ribosomal protein S7 (predicted)	1	5	5	5	5	5	5	5	5	5	28.2	28.2	28.2	21.947	195	195	0	37.894	By MS/MS	By MS/MS	28.2	28.2	254500000	123000000	131500000	117620000	130050000	3	3	6				140	262;1115;2235;3260;5858	True;True;True;True;True	275;1170;2326;3397;6138	630;631;2374;2375;4979;4980;7009;7010;7011;7012;12978;12979	612;613;2270;2271;4775;6723;6724;6725;12496	613;2270;4775;6723;12496
SPAC1952.16|rga9|I|RhoGAP,	SPAC1952.16|rga9|I|RhoGAP,	11	11	11	>SPAC1952.16|rga9|I|RhoGAP, GTPase activator towards Rho/Rac/Cdc42-like small GTPases (predicted)	1	11	11	11	8	11	8	11	8	11	22.7	22.7	22.7	76.867	670	670	0	80.226	By MS/MS	By MS/MS	13.4	22.7	71482000	22404000	49078000	29705000	39229000	7	10	17				141	182;869;2528;3092;3446;4798;5154;5169;5286;5850;6638	True;True;True;True;True;True;True;True;True;True;True	192;913;2628;3223;3586;5030;5397;5412;5533;6130;6942	476;1857;1858;5542;5543;6677;6678;7351;7352;10809;11485;11486;11516;11517;11745;12964;12965;14568;14569	466;1775;5302;5303;6403;6404;7050;7051;10435;11073;11074;11102;11103;11314;12482;12483;14057;14058	466;1775;5302;6404;7051;10435;11073;11103;11314;12483;14058
SPAC19A8.04|erg5|I|C-22	SPAC19A8.04|erg5|I|C-22	8	8	8	>SPAC19A8.04|erg5|I|C-22 sterol desaturase Erg5	1	8	8	8	7	7	7	7	7	7	15.8	15.8	15.8	62.27	543	543	0	51.84	By MS/MS	By MS/MS	14.2	14.4	62528000	27412000	35117000	28506000	32199000	6	5	11				142	435;971;1552;1625;1837;2108;2742;6389	True;True;True;True;True;True;True;True	454;1019;1622;1695;1914;2197;2854;6684	969;2067;2068;3269;3270;3526;3527;4128;4682;4683;5950;5951;14018;14019	937;1978;1979;3113;3114;3393;3978;4507;5689;13502;13503	937;1979;3113;3393;3978;4507;5689;13502
SPAC19A8.15|trp2|I|tryptophan	SPAC19A8.15|trp2|I|tryptophan	13	13	13	>SPAC19A8.15|trp2|I|tryptophan synthase (predicted)	1	13	13	13	11	13	11	13	11	13	25	25	25	75.436	697	697	0	96.004	By MS/MS	By MS/MS	21.5	25	221690000	94401000	127280000	97092000	117990000	12	9	21				143	89;104;304;542;709;2453;2473;2479;3389;4375;4449;5396;5910	True;True;True;True;True;True;True;True;True;True;True;True;True	94;110;318;565;744;2550;2571;2577;3528;4586;4665;5647;6191	188;214;215;713;714;1188;1189;1544;1545;5395;5396;5430;5431;5441;5442;7245;7246;9836;9837;9993;9994;11951;11952;13076	179;205;698;699;1144;1482;1483;5161;5162;5195;5196;5197;5207;5208;6952;6953;9515;9516;9654;9655;11508;12591	179;205;699;1144;1482;5162;5196;5208;6952;9515;9654;11508;12591
SPAC19G12.01c|cut20|I|anaphase-promoting	SPAC19G12.01c|cut20|I|anaphase-promoting	2	2	2	>SPAC19G12.01c|cut20|I|anaphase-promoting complex, platform subcomplex scaffold subunit Apc4/Cut20	1	2	2	2	2	1	2	1	2	1	2.9	2.9	2.9	82.604	719	719	0	11.028	By MS/MS	By matching	2.9	1.5	10444000	6813200	3631100	6813200	0	0	0	0				144	4982;5835	True;True	5221;6114	11169;11170;12932	10776;12451	10776;12451
SPAC19G12.06c|hta2|I|histone;SPCC622.08c|hta1|III|histone;SPBC11B10.10c|pht1|II|histone	SPAC19G12.06c|hta2|I|histone;SPCC622.08c|hta1|III|histone;SPBC11B10.10c|pht1|II|histone	2;2;1	2;2;1	2;2;1	>SPAC19G12.06c|hta2|I|histone H2A beta;>SPCC622.08c|hta1|III|histone H2A alpha;>SPBC11B10.10c|pht1|II|histone H2A variant H2A.Z, Pht1	3	2	2	2	2	2	2	2	2	2	12.2	12.2	12.2	13.776	131	131;132;139	0	13.122	By MS/MS	By MS/MS	12.2	12.2	38636000	17382000	21253000	17519000	20014000	2	2	4				145	172;2167	True;True	182;2257	459;460;4805;4806	449;450;4621;4622	449;4621
SPAC19G12.07c|rsd1|I|RNA-binding	SPAC19G12.07c|rsd1|I|RNA-binding	4	4	4	>SPAC19G12.07c|rsd1|I|RNA-binding protein Rsd1 (predicted)	1	4	4	4	4	3	4	3	4	3	8	8	8	69.362	603	603	0	28.396	By MS/MS	By MS/MS	8	6.3	24704000	10812000	13892000	11259000	12723000	3	3	6				146	434;1334;3802;6227	True;True;True;True	453;1394;3950;6520	967;968;2827;2828;8052;13701;13702	935;936;2688;2689;7698;13197;13198	936;2689;7698;13198
SPAC19G12.08|scs7|I|sphingosine	SPAC19G12.08|scs7|I|sphingosine	3	3	3	>SPAC19G12.08|scs7|I|sphingosine hydroxylase Scs7	1	3	3	3	2	3	2	3	2	3	9.2	9.2	9.2	40.229	347	347	0	20.239	By matching	By MS/MS	7.2	9.2	8776200	2743300	6032800	2756000	5707000	0	3	3				147	2954;4062;4774	True;True;True	3072;4255;5002	6361;6362;9172;10748;10749	6086;8888;10375	6086;8888;10375
SPAC19G12.09|SPAC19G12.09|I|NADH/NADPH	SPAC19G12.09|SPAC19G12.09|I|NADH/NADPH	2	2	2	>SPAC19G12.09|SPAC19G12.09|I|NADH/NADPH dependent indole-3-acetaldehyde reductase	1	2	2	2	2	1	2	1	2	1	7	7	7	31.569	284	284	0	13.966	By MS/MS	By MS/MS	7	3.2	13950000	11275000	2675400	11275000	0	2	1	3				148	2648;6480	True;True	2754;6778	5766;5767;5768;14250	5511;5512;13748	5512;13748
SPAC19G12.10c|cpy1|I|vacuolar	SPAC19G12.10c|cpy1|I|vacuolar	21	21	21	>SPAC19G12.10c|cpy1|I|vacuolar carboxypeptidase Y	1	21	21	21	21	17	21	17	21	17	27.5	27.5	27.5	114.24	1002	1002	0	174.84	By MS/MS	By MS/MS	27.5	26.3	482830000	274920000	207910000	266960000	205080000	21	18	39				149	92;144;641;642;714;808;860;970;1036;1357;1434;1505;1672;1747;2183;2744;3122;3134;4697;5421;5970	True;True;True;True;True;True;True;True;True;True;True;True;True;True;True;True;True;True;True;True;True	97;98;154;672;673;749;846;904;1018;1087;1088;1419;1500;1573;1745;1821;2273;2274;2856;3253;3265;4922;5674;6253	192;193;194;407;408;1406;1407;1408;1409;1552;1733;1838;1839;2065;2066;2207;2208;2209;2872;2873;3047;3048;3181;3182;3617;3618;3766;3767;4834;4835;5954;6735;6755;6756;10594;10595;12006;12007;13211;13212	182;183;184;398;399;400;1357;1358;1359;1488;1663;1757;1758;1977;2112;2113;2114;2731;2732;2904;2905;2906;3033;3034;3478;3479;3626;3627;4647;4648;5691;6460;6478;6479;10225;11564;11565;12717;12718	182;398;1358;1359;1488;1663;1758;1977;2113;2732;2905;3034;3478;3627;4648;5691;6460;6478;10225;11565;12718	50;51;52	434;525;729
SPAC19G12.15c|tpp1|I|trehalose-6-phosphate	SPAC19G12.15c|tpp1|I|trehalose-6-phosphate	12	12	12	>SPAC19G12.15c|tpp1|I|trehalose-6-phosphate phosphatase Tpp1	1	12	12	12	10	11	10	11	10	11	20.3	20.3	20.3	93.876	817	817	0	82.414	By MS/MS	By MS/MS	16.9	18.5	85862000	38997000	46865000	43486000	39943000	8	10	18				150	51;254;378;998;1820;2661;3196;3371;5163;5196;5257;5986	True;True;True;True;True;True;True;True;True;True;True;True	52;266;395;1048;1896;2767;3331;3509;5406;5439;5502;6269	100;101;611;612;859;860;2123;4093;4094;5790;6892;6893;7210;11505;11506;11561;11562;11681;11682;13240;13241	93;94;594;832;2034;3945;3946;5531;6612;6613;6918;11092;11143;11253;11254;11255;12741;12742;12743;12744	94;594;832;2034;3945;5531;6612;6918;11092;11143;11253;12743
SPAC1A6.04c|plb1|I|phospholipase	SPAC1A6.04c|plb1|I|phospholipase	1	1	1	>SPAC1A6.04c|plb1|I|phospholipase B homolog Plb1	1	1	1	1	1	1	1	1	1	1	1.5	1.5	1.5	67.118	613	613	0.002181	7.4792	By MS/MS	By MS/MS	1.5	1.5	5396800	2496200	2900600	0	2750100	1	1	2				151	2655	TRUE	2761	5780;5781	5523;5524	5524
SPAC1B1.02c|SPAC1B1.02c|I|NAD/NADH	SPAC1B1.02c|SPAC1B1.02c|I|NAD/NADH	18	18	18	>SPAC1B1.02c|SPAC1B1.02c|I|NAD/NADH kinase (predicted)	1	18	18	18	17	17	17	17	17	17	38.7	38.7	38.7	60.708	537	537	0	287.47	By MS/MS	By MS/MS	37.4	37.2	241630000	117670000	123960000	120480000	112530000	16	17	33				152	165;766;861;862;1514;1620;1715;2811;3281;3619;4106;4215;4594;4799;5080;5507;6010;6616	True;True;True;True;True;True;True;True;True;True;True;True;True;True;True;True;True;True	175;802;905;906;1582;1690;1789;2924;3418;3763;4299;4414;4816;5031;5320;5768;6293;6920	446;447;1658;1840;1841;1842;1843;1844;1845;3197;3516;3517;3708;3709;6072;6073;7046;7047;7685;7686;9246;9247;9467;9468;10308;10309;10810;10811;11345;11346;11347;12214;12215;13281;13282;14514;14515	436;437;1590;1759;1760;1761;1762;3048;3383;3384;3570;3571;5807;5808;6759;6760;7351;7352;8957;8958;8959;9165;9166;9939;9940;10436;10437;10938;10939;10940;11763;11764;12783;12784;13997;13998	436;1590;1759;1761;3048;3383;3571;5807;6760;7351;8957;9166;9939;10437;10938;11764;12784;13997
SPAC1B1.03c|kap95|I|karyopherin	SPAC1B1.03c|kap95|I|karyopherin	1	1	1	>SPAC1B1.03c|kap95|I|karyopherin Kap95	1	1	1	1	1	0	1	0	1	0	1.4	1.4	1.4	94.746	863	863	0.0095969	6.1341	By MS/MS	By matching	1.4	0	2122200	2122200	0	2122200	0	1	0	1				153	3796	TRUE	3944	8036	7685	7685
SPAC1B2.03c|SPAC1B2.03c|I|GNS1/SUR4	SPAC1B2.03c|SPAC1B2.03c|I|GNS1/SUR4	3	3	3	>SPAC1B2.03c|SPAC1B2.03c|I|GNS1/SUR4 family protein (predicted)	1	3	3	3	3	3	3	3	3	3	12	12	12	38.337	334	334	0	23.784	By MS/MS	By MS/MS	12	12	33224000	13246000	19978000	11953000	20234000	3	3	6				154	3812;5463;6525	True;True;True	3960;5717;6823	8073;8074;12105;12106;14320;14321	7717;7718;11658;11659;13815;13816	7717;11658;13815
SPAC1B3.03c|wis2|I|cyclophilin	SPAC1B3.03c|wis2|I|cyclophilin	8	8	8	>SPAC1B3.03c|wis2|I|cyclophilin family peptidyl-prolyl cis-trans isomerase Wis2	1	8	8	8	8	7	8	7	8	7	34.8	34.8	34.8	40.161	356	356	0	57.459	By MS/MS	By MS/MS	34.8	32.6	84595000	39918000	44677000	42172000	37143000	9	8	17				155	798;1864;4025;4034;4421;5458;6535;6615	True;True;True;True;True;True;True;True	836;1943;4217;4226;4635;5712;6833;6834;6919	1717;1718;4178;4179;9098;9099;9119;9120;9934;9935;12081;14339;14340;14341;14342;14512;14513	1648;1649;4025;4026;8818;8819;8837;8838;9603;9604;11633;13834;13835;13836;13837;13995;13996	1649;4026;8819;8838;9603;11633;13837;13996	53;54	64;235
SPAC1B3.05|not3|I|CCR4-Not	SPAC1B3.05|not3|I|CCR4-Not	3	3	3	>SPAC1B3.05|not3|I|CCR4-Not complex subunit Not3/5 (predicted)	1	3	3	3	2	3	2	3	2	3	5.8	5.8	5.8	72.759	640	640	0	19.64	By MS/MS	By MS/MS	3.6	5.8	19247000	7824000	11423000	0	10830000	0	1	1				156	3636;4365;6381	True;True;True	3781;4576;6676	7718;7719;9814;9815;14000	7382;9501;13483	7382;9501;13483
SPAC1B3.12c|rpb10|I|DNA-directed	SPAC1B3.12c|rpb10|I|DNA-directed	1	1	1	>SPAC1B3.12c|rpb10|I|DNA-directed RNA polymerase I, II, and III subunit Rpb10	1	1	1	1	1	1	1	1	1	1	35.2	35.2	35.2	8.2757	71	71	0	12.88	By MS/MS	By MS/MS	35.2	35.2	9479200	5195000	4284200	0	4061800	1	1	2				157	5940	TRUE	6221	13137;13138	12646;12647	12646
SPAC1B3.13|nan1|I|U3	SPAC1B3.13|nan1|I|U3	2	2	2	>SPAC1B3.13|nan1|I|U3 snoRNP-associated protein Nan1 (predicted)	1	2	2	2	0	2	0	2	0	2	2.2	2.2	2.2	88.937	806	806	0	11.091	By matching	By MS/MS	0	2.2	1732000	0	1732000	0	1642100	0	2	2				158	3312;5021	True;True	3450;5260	7103;11236	6818;10838	6818;10838
SPAC1D4.04|cct2|I|chaperonin-containing	SPAC1D4.04|cct2|I|chaperonin-containing	14	14	14	>SPAC1D4.04|cct2|I|chaperonin-containing T-complex beta subunit Cct2	1	14	14	14	13	13	13	13	13	13	35.5	35.5	35.5	56.676	527	527	0	113.91	By MS/MS	By MS/MS	33.6	31.7	195810000	102440000	93371000	96295000	94671000	14	12	26				159	233;1666;1781;1927;2464;2582;2893;3103;3650;3664;4060;4391;4792;4922	True;True;True;True;True;True;True;True;True;True;True;True;True;True	244;1738;1857;2012;2562;2685;3010;3234;3796;3810;4253;4604;5023;5160	570;571;3605;3606;4010;4011;4303;4304;5415;5416;5644;5645;6238;6239;6698;6699;7746;7771;7772;9167;9168;9169;9873;9874;10795;10796;11044	554;555;3466;3467;3868;3869;4155;5181;5182;5396;5397;5963;5964;6424;6425;6426;7406;7430;7431;8883;8884;8885;9552;9553;9554;10422;10423;10657	554;3466;3869;4155;5181;5397;5963;6424;7406;7431;8884;9553;10422;10657
SPAC1F12.02c|tma19|I|translationally	SPAC1F12.02c|tma19|I|translationally	3	3	3	>SPAC1F12.02c|tma19|I|translationally controlled tumor protein homolog Tma19/Tpt1	1	3	3	3	1	3	1	3	1	3	21.4	21.4	21.4	19.048	168	168	0	22.547	By MS/MS	By MS/MS	4.8	21.4	14448000	7579600	6868400	0	6511800	1	3	4				160	663;844;928	True;True;True	695;887;974	1456;1457;1809;1981	1404;1405;1733;1891	1404;1733;1891
SPAC1F12.07|ser1|I|phosphoserine	SPAC1F12.07|ser1|I|phosphoserine	8	8	8	>SPAC1F12.07|ser1|I|phosphoserine aminotransferase (predicted)	1	8	8	8	8	7	8	7	8	7	25.4	25.4	25.4	42.797	389	389	0	58.406	By MS/MS	By MS/MS	25.4	21.9	62118000	24868000	37250000	27394000	31693000	8	6	14				161	441;813;2051;2388;3298;4446;5789;6465	True;True;True;True;True;True;True;True	460;852;2138;2483;3435;4662;6065;6763	981;982;1744;1745;4558;4559;5270;5271;5272;7079;7080;9988;12839;12840;14223;14224	949;950;1675;4385;4386;5039;5040;6796;6797;6798;9649;12367;12368;13725	950;1675;4386;5040;6796;9649;12367;13725
SPAC1F3.02c|mkh1|I|MEK;SPBC1D7.05|byr2|II|MAP	SPAC1F3.02c|mkh1|I|MEK	9;1	9;1	9;1	>SPAC1F3.02c|mkh1|I|MEK kinase (MEKK) Mkh1	2	9	9	9	7	7	7	7	7	7	9.8	9.8	9.8	125.13	1116	1116;659	0	59.333	By MS/MS	By MS/MS	7.9	7.1	33031000	9598000	23433000	12802000	19013000	5	7	12				162	74;1954;2530;2700;3162;4042;4322;5824;6047	True;True;True;True;True;True;True;True;True	77;2040;2630;2811;3293;4234;4532;6103;6331	149;4360;4361;5545;5878;6805;6806;9132;9728;9729;12913;12914;13349;13350;13351	142;4207;4208;5305;5616;6525;8849;9417;9418;12433;12852;12853;12854	142;4207;5305;5616;6525;8849;9418;12433;12854
SPAC1F3.05|gga21|I|Golgi	SPAC1F3.05|gga21|I|Golgi	1	1	1	>SPAC1F3.05|gga21|I|Golgi localized Arf binding gamma-adaptin ortholog Gga21	1	1	1	1	1	1	1	1	1	1	2.7	2.7	2.7	56.789	510	510	0.0059406	6.31	By MS/MS	By MS/MS	2.7	2.7	2273200	2273200	0	2273200	0	1	1	2				163	2583	TRUE	2686	5646;5647	5398;5399	5399
SPAC1F3.06c|spo15|I|mitotic	SPAC1F3.06c|spo15|I|mitotic	25	25	25	>SPAC1F3.06c|spo15|I|mitotic and mieotic spindle pole body protein Spo15	1	25	25	25	21	21	21	21	21	21	14.8	14.8	14.8	222.78	1957	1957	0	183.6	By MS/MS	By MS/MS	13	12.1	188050000	92538000	95511000	98308000	79157000	18	19	37				164	684;759;1182;1229;1489;2013;3023;3076;3225;3590;3689;3736;3908;3958;4268;4320;4746;4776;4932;4990;5044;5088;5094;5162;5464	True;True;True;True;True;True;True;True;True;True;True;True;True;True;True;True;True;True;True;True;True;True;True;True;True	717;794;1239;1288;1557;2099;3150;3206;3361;3734;3835;3883;4073;4141;4474;4530;4972;5004;5170;5229;5284;5328;5334;5405;5718	1496;1497;1644;1645;2508;2613;3149;3150;4473;4474;6537;6538;6645;6646;6945;7633;7817;7909;7910;8416;8673;8674;9590;9591;9726;10689;10690;10752;10753;10754;10755;11062;11063;11181;11182;11279;11280;11359;11368;11369;11502;11503;11504;12107;12108	1442;1577;1578;2393;2480;3002;3003;4311;6265;6266;6371;6372;6660;7308;7474;7565;8058;8332;8333;9281;9282;9415;10313;10314;10378;10379;10380;10381;10673;10674;10787;10788;10878;10952;10960;10961;11090;11091;11660	1442;1578;2393;2480;3002;4311;6265;6372;6660;7308;7474;7565;8058;8332;9282;9415;10314;10380;10673;10787;10878;10952;10961;11091;11660	55	1624
SPAC1F3.09|mug161|I|CwfJ	SPAC1F3.09|mug161|I|CwfJ	4	4	4	>SPAC1F3.09|mug161|I|CwfJ family protein, splicing factor (predicted)	1	4	4	4	3	3	3	3	3	3	11.4	11.4	11.4	63.216	561	561	0	34.948	By MS/MS	By MS/MS	7.5	8.9	32579000	11861000	20719000	14226000	17278000	3	3	6				165	1571;3354;4230;5935	True;True;True;True	1641;3492;4433;6216	3423;7177;7178;9509;13124;13125	3293;6886;6887;9207;12633;12634	3293;6887;9207;12634
SPAC1F5.02|pdi1|I|protein	SPAC1F5.02|pdi1|I|protein	5	5	5	>SPAC1F5.02|pdi1|I|protein disulfide isomerase (predicted)	1	5	5	5	5	3	5	3	5	3	10.6	10.6	10.6	54.88	492	492	0	33.761	By MS/MS	By MS/MS	10.6	6.1	23773000	13384000	10388000	11592000	11642000	5	3	8				166	56;986;1276;4522;6576	True;True;True;True;True	57;1035;1336;4741;6878	112;113;2098;2704;2705;10145;14428;14429	105;106;2009;2565;2566;9789;13920;13921	105;2009;2566;9789;13920
SPAC1F5.06|lsh1|I|ER	SPAC1F5.06|lsh1|I|ER	2	2	2	>SPAC1F5.06|lsh1|I|ER heat shock protein Lsh1 (predicted)	1	2	2	2	2	2	2	2	2	2	3.7	3.7	3.7	94.897	848	848	0	15.438	By MS/MS	By MS/MS	3.7	3.7	9680000	5269900	4410100	5277100	4174000	2	1	3				167	14;1098	True;True	14;1153	26;27;2342;2343	25;26;2239	26;2239
SPAC1F5.11c|tra2|I|NuA4	SPAC1F5.11c|tra2|I|NuA4	15	15	15	>SPAC1F5.11c|tra2|I|NuA4 complex phosphatidylinositol pseudokinase complex subunit Tra2	1	15	15	15	10	14	10	14	10	14	5	5	5	420.78	3655	3655	0	102.67	By MS/MS	By MS/MS	3.6	4.5	47891000	20111000	27779000	21557000	24892000	7	13	20				168	761;811;980;1243;1274;1454;2015;2273;2425;3675;4165;4607;5851;6086;6658	True;True;True;True;True;True;True;True;True;True;True;True;True;True;True	796;849;1028;1302;1334;1520;2101;2365;2522;3821;4360;4829;6131;6376;6962	1648;1649;1738;2083;2639;2640;2700;2701;3085;3086;4479;5054;5343;5344;7791;7792;9359;10332;10333;12966;13433;13434;14611;14612	1581;1582;1669;1995;2504;2505;2562;2941;2942;4315;4837;5106;7450;7451;9065;9960;9961;12484;12930;12931;14099	1582;1669;1995;2504;2562;2942;4315;4837;5106;7450;9065;9961;12484;12930;14099	56	741
SPAC1F7.04|rho1|I|Rho;SPAC20H4.11c|rho5|I|Rho	SPAC1F7.04|rho1|I|Rho;SPAC20H4.11c|rho5|I|Rho	2;1	2;1	2;1	>SPAC1F7.04|rho1|I|Rho family GTPase Rho1;>SPAC20H4.11c|rho5|I|Rho family GTPase Rho5	2	2	2	2	1	2	1	2	1	2	12.9	12.9	12.9	22.523	202	202;200	0	11.13	By matching	By MS/MS	8.4	12.9	4452700	621900	3830800	0	3631900	0	1	1				169	5340;5569	True;True	5588;5833	11845;12371;12372	11405;11921	11405;11921
SPAC1F7.05|cdc22|I|ribonucleoside	SPAC1F7.05|cdc22|I|ribonucleoside	20	20	20	>SPAC1F7.05|cdc22|I|ribonucleoside reductase large subunit Cdc22	1	20	20	20	18	20	18	20	18	20	33.4	33.4	33.4	91.998	811	811	0	160.25	By MS/MS	By MS/MS	30.3	33.4	363610000	139710000	223900000	169860000	182130000	18	20	38				170	97;772;1587;1879;2143;2205;2312;2480;2762;2822;3094;3787;5310;5425;5551;5733;5780;5866;6031;6444	True;True;True;True;True;True;True;True;True;True;True;True;True;True;True;True;True;True;True;True	103;808;1657;1960;2233;2296;2406;2578;2874;2935;3225;3935;5557;5679;5814;6008;6056;6146;6315;6739	202;203;1667;1668;3452;3453;4213;4214;4752;4753;4912;4913;4914;4915;5126;5127;5443;5444;5982;5983;6092;6093;6681;6682;8014;8015;11789;11790;12015;12016;12341;12719;12720;12824;12825;12992;12993;13321;13322;14176	192;193;1598;1599;3320;3321;4069;4070;4569;4570;4718;4719;4720;4721;4904;4905;5209;5210;5718;5719;5826;5827;6407;7665;7666;11354;11355;11573;11574;11891;12256;12355;12356;12509;12510;12826;12827;12828;13682	193;1598;3321;4070;4569;4718;4905;5209;5718;5826;6407;7665;11355;11573;11891;12256;12356;12509;12827;13682	57	660
SPBC839.04|rpl803|II|60S;SPBC2F12.07c|rpl802|II|60S;SPAC1F7.13c|rpl801|I|60S	SPBC839.04|rpl803|II|60S;SPBC2F12.07c|rpl802|II|60S;SPAC1F7.13c|rpl801|I|60S	9;9;9	9;9;9	9;9;9	>SPBC839.04|rpl803|II|60S ribosomal protein L8 (predicted);>SPBC2F12.07c|rpl802|II|60S ribosomal protein L8 (predicted);>SPAC1F7.13c|rpl801|I|60S ribosomal protein L8 (predicted)	3	9	9	9	9	9	9	9	9	9	45.1	45.1	45.1	27.1	253	253;253;253	0	78.784	By MS/MS	By MS/MS	45.1	45.1	397330000	181280000	216040000	174600000	205230000	10	11	21				171	1959;2002;2347;2971;3973;4888;5157;5506;5894	True;True;True;True;True;True;True;True;True	2045;2088;2441;3091;4162;5123;5400;5767;6174	4369;4370;4452;4453;4454;5190;5191;6402;6403;8717;8718;10977;10978;10979;10980;11491;11492;11493;11494;12212;12213;13044;13045	4215;4294;4295;4963;6128;6129;8371;8372;8373;10597;10598;10599;10600;11078;11079;11080;11081;11082;11761;11762;12556;12557	4215;4294;4963;6128;8371;10600;11082;11761;12556
SPAC1F8.07c|pdc101|I|pyruvate	SPAC1F8.07c|pdc101|I|pyruvate	29	29	29	>SPAC1F8.07c|pdc101|I|pyruvate decarboxylase (predicted)	1	29	29	29	29	28	29	28	29	28	57.4	57.4	57.4	61.547	568	568	0	323.31	By MS/MS	By MS/MS	57.4	53	6512500000	2974900000	3537600000	2549000000	2916700000	52	53	105				172	11;28;84;458;459;534;602;988;1341;1342;1717;1718;2028;2147;2683;2861;2933;2946;3026;3557;3690;3691;3763;4064;4317;4643;5490;5496;6277	True;True;True;True;True;True;True;True;True;True;True;True;True;True;True;True;True;True;True;True;True;True;True;True;True;True;True;True;True	11;28;88;89;478;479;557;628;629;1038;1401;1402;1403;1404;1791;1792;2115;2237;2790;2974;3051;3064;3153;3154;3701;3836;3837;3910;4257;4527;4866;4867;5747;5748;5749;5755;5756;6570;6571	20;21;50;51;174;175;176;177;178;179;180;181;1026;1027;1028;1029;1030;1031;1176;1311;1312;1313;1314;2104;2105;2839;2840;2841;2842;2843;2844;2845;2846;3711;3712;3713;3714;4505;4506;4507;4508;4509;4510;4511;4512;4513;4762;4763;4764;5839;5840;6169;6170;6322;6323;6345;6346;6347;6348;6543;6544;6545;6546;7570;7571;7818;7819;7820;7821;7959;7960;9175;9176;9177;9178;9720;9721;10483;10484;10485;10486;10487;…	19;20;48;49;164;165;166;167;168;169;170;171;172;992;993;994;995;996;997;1133;1261;1262;1263;1264;2014;2015;2016;2697;2698;2699;2700;2701;2702;2703;2704;2705;2706;3573;3574;3575;3576;4339;4340;4341;4342;4343;4344;4345;4581;4582;4583;5579;5580;5899;5900;6046;6047;6068;6069;6070;6071;6072;6270;6271;6272;6273;7253;7254;7475;7476;7477;7478;7611;7612;8891;8892;8893;8894;9407;9408;9409;9410;9411;10123;1…	20;48;164;992;994;1133;1264;2016;2704;2706;3573;3576;4342;4581;5580;5899;6046;6072;6271;7253;7475;7477;7612;8894;9411;10124;11727;11741;13282	58;59;60;61;62;63;64;65	9;153;249;331;416;429;443;459
SPAC20G4.06c|adf1|I|actin	SPAC20G4.06c|adf1|I|actin	1	1	1	>SPAC20G4.06c|adf1|I|actin depolymerizing factor, cofilin	1	1	1	1	1	1	1	1	1	1	10.2	10.2	10.2	15.62	137	137	0.0023585	9.1038	By MS/MS	By MS/MS	10.2	10.2	3982700	0	3982700	0	3776000	1	1	2				173	2491	TRUE	2590	5465;5466	5229;5230	5229
SPAC20G8.02|SPAC20G8.02|I|mitochondrial	SPAC20G8.02|SPAC20G8.02|I|mitochondrial	1	1	1	>SPAC20G8.02|SPAC20G8.02|I|mitochondrial DDHD family phospholipase (predicted)	1	1	1	1	1	1	1	1	1	1	1.7	1.7	1.7	85.69	757	757	0.0031348	6.9964	By MS/MS	By MS/MS	1.7	1.7	2696300	1076600	1619700	0	1535600	1	1	2				174	4279	TRUE	4485	9611;9612	9300;9301	9300
SPAC20G8.03|itr2|I|MFS	SPAC20G8.03|itr2|I|MFS	2	2	2	>SPAC20G8.03|itr2|I|MFS myo-inositol transmembrane transporter	1	2	2	2	1	2	1	2	1	2	2.9	2.9	2.9	61.136	557	557	0	11.614	By MS/MS	By MS/MS	1.6	2.9	5877700	3342000	2535700	0	2404100	1	1	2				175	1716;6151	True;True	1790;6442	3710;13553;13554	3572;13049	3572;13049
SPAC20G8.04c|SPAC20G8.04c|I|mitochondrial	SPAC20G8.04c|SPAC20G8.04c|I|mitochondrial	1	1	1	>SPAC20G8.04c|SPAC20G8.04c|I|mitochondrial electron transfer flavoprotein-ubiquinone oxidoreductase Cir2 (predicted)	1	1	1	1	1	1	1	1	1	1	2.4	2.4	2.4	69.472	632	632	0.0021858	7.539	By MS/MS	By matching	2.4	2.4	4988200	1958500	3029700	0	2872400	1	0	1				176	4895	TRUE	5131	10992;10993	10610	10610
SPAC20G8.05c|cdc15|I|extended	SPAC20G8.05c|cdc15|I|extended	1	1	1	>SPAC20G8.05c|cdc15|I|extended Fer/CIP4 (EFC) domain protein Cdc15	1	1	1	1	0	1	0	1	0	1	1.4	1.4	1.4	102.12	927	927	0.0021097	7.1382	By matching	By MS/MS	0	1.4	3149600	0	3149600	0	2986100	0	0	0				177	6196	TRUE	6488	13635	13127	13127
SPAC20G8.06|not1|I|CCR4-Not	SPAC20G8.06|not1|I|CCR4-Not	6	6	6	>SPAC20G8.06|not1|I|CCR4-Not complex subunit Not1 (predicted)	1	6	6	6	4	4	4	4	4	4	3.6	3.6	3.6	237.13	2100	2100	0	72.374	By MS/MS	By MS/MS	2.5	2	16073000	4364300	11709000	0	11101000	4	3	7				178	1285;3412;3517;4132;5567;6015	True;True;True;True;True;True	1345;3551;3659;4325;5831;6298	2725;2726;7287;7288;7487;9296;12369;13290	2582;2583;6990;6991;7174;9004;11919;12792	2583;6990;7174;9004;11919;12792	66	1790
SPAC20G8.07c|erg2|I|C-8	SPAC20G8.07c|erg2|I|C-8	1	1	1	>SPAC20G8.07c|erg2|I|C-8 sterol isomerase Erg2	1	1	1	1	0	1	0	1	0	1	5.5	5.5	5.5	24.671	219	219	0.0022857	8.1496	By matching	By MS/MS	0	5.5	2144200	0	2144200	0	2032900	0	1	1				179	4492	TRUE	4709	10085	9738	9738
SPAC20G8.10c|atg6|I|autophagy	SPAC20G8.10c|atg6|I|autophagy	3	3	3	>SPAC20G8.10c|atg6|I|autophagy associated beclin family protein Atg6	1	3	3	3	3	3	3	3	3	3	7.1	7.1	7.1	53.959	464	464	0	20.167	By MS/MS	By MS/MS	7.1	7.1	16517000	8200700	8316700	8717200	7368500	2	3	5				180	2401;3034;5601	True;True;True	2496;3162;5868	5295;5296;6562;6563;12457;12458	5059;5060;6289;6290;11999	5059;6290;11999
SPAC21E11.03c|pcr1|I|transcription	SPAC21E11.03c|pcr1|I|transcription	4	4	4	>SPAC21E11.03c|pcr1|I|transcription factor Pcr1	1	4	4	4	4	4	4	4	4	4	25.1	25.1	25.1	19.348	171	171	0	33.523	By MS/MS	By MS/MS	25.1	25.1	54880000	37117000	17763000	37035000	16923000	6	3	9				181	1072;3575;4687;5129	True;True;True;True	1126;3719;4912;5371	2290;2291;2292;7602;7603;10577;10578;11440;11441	2189;2190;2191;7283;7284;10208;10209;10210;11034;11035	2189;7283;10209;11034
SPAC21E11.06|tif224|I|translation	SPAC21E11.06|tif224|I|translation	3	3	3	>SPAC21E11.06|tif224|I|translation initiation factor eIF2B delta subunit	1	3	3	3	2	3	2	3	2	3	8.6	8.6	8.6	51.583	467	467	0	20.291	By MS/MS	By MS/MS	5.8	8.6	12278000	5525400	6752400	5404100	6523200	1	3	4				182	2789;4629;6256	True;True;True	2902;4852;6549	6032;6033;10458;10459;13753	5772;5773;10098;10099;13243	5773;10098;13243
SPAC222.07c|hri2|I|eIF2	SPAC222.07c|hri2|I|eIF2	16	16	16	>SPAC222.07c|hri2|I|eIF2 alpha kinase Hri2	1	16	16	16	13	13	13	13	13	13	28.6	28.6	28.6	73.366	639	639	0	113.51	By MS/MS	By MS/MS	24.1	24.6	241530000	135440000	106090000	124220000	111800000	9	10	19				183	694;765;1161;1527;1566;1722;2439;2637;3171;3365;4063;4108;4259;4737;5098;6488	True;True;True;True;True;True;True;True;True;True;True;True;True;True;True;True	729;801;1218;1596;1636;1796;2536;2743;3304;3503;4256;4301;4465;4963;5338;6786	1515;1516;1657;2470;2471;3224;3294;3295;3720;3721;5369;5370;5747;6841;7199;7200;9173;9174;9249;9250;9571;9572;10672;11375;11376;14261	1458;1589;2361;2362;3071;3136;3137;3582;5135;5136;5492;6562;6907;6908;8889;8890;8961;9265;10296;10967;10968;13762	1458;1589;2361;3071;3137;3582;5135;5492;6562;6907;8890;8961;9265;10296;10968;13762
SPAC222.08c|sno1|I|glutamine	SPAC222.08c|sno1|I|glutamine	7	7	7	>SPAC222.08c|sno1|I|glutamine aminotransferase subunit Sno1 (predicted)	1	7	7	7	6	5	6	5	6	5	42.7	42.7	42.7	25.901	234	234	0	119.34	By MS/MS	By MS/MS	39.7	29.9	128620000	70570000	58046000	51483000	74119000	6	6	12				184	405;623;1049;1497;3326;5558;6316	True;True;True;True;True;True;True	423;654;1102;1565;3464;5822;6610	910;911;1367;2230;2231;3164;3165;7129;12356;13867;13868	879;880;1319;2133;2134;3015;3016;3017;6842;11906;13354;13355	879;1319;2134;3016;6842;11906;13354
SPAC222.11|hem13|I|coproporphyrinogen	SPAC222.11|hem13|I|coproporphyrinogen	2	2	2	>SPAC222.11|hem13|I|coproporphyrinogen III oxidase Hem13 (predicted)	1	2	2	2	2	1	2	1	2	1	7.7	7.7	7.7	36.244	312	312	0	12.21	By MS/MS	By MS/MS	7.7	2.9	5579200	2822300	2757000	2822300	0	2	1	3				185	5838;6291	True;True	6117;6585	12939;13820;13821	12457;13308;13309	12457;13309
SPAC222.12c|atp2|I|F1-ATPase	SPAC222.12c|atp2|I|F1-ATPase	11	11	11	>SPAC222.12c|atp2|I|F1-ATPase beta subunit Atp2	1	11	11	11	10	11	10	11	10	11	32.4	32.4	32.4	56.875	525	525	0	121.27	By MS/MS	By MS/MS	29.7	32.4	135220000	59234000	75983000	65214000	66058000	11	8	19				186	198;683;1580;1934;2445;2550;5035;5450;5674;5760;6203	True;True;True;True;True;True;True;True;True;True;True	208;716;1650;2020;2542;2651;5275;5704;5946;6036;6496	506;1494;1495;3439;3440;4318;4319;5381;5382;5579;5580;11263;11264;12066;12067;12601;12602;12773;12774;13659;13660	495;1440;1441;3306;3307;4168;4169;5147;5148;5336;5337;10864;10865;11623;12141;12142;12304;13151;13152	495;1440;3307;4168;5148;5337;10865;11623;12141;12304;13152
SPAC227.07c|pab1|I|protein	SPAC227.07c|pab1|I|protein	3	3	3	>SPAC227.07c|pab1|I|protein phosphatase PP2A regulatory subunit B-55 Pab1	1	3	3	3	3	3	3	3	3	3	8.4	8.4	8.4	52.795	463	463	0	42.017	By MS/MS	By MS/MS	8.4	8.4	24095000	13096000	10999000	13146000	10378000	4	3	7				187	1351;4843;5473	True;True;True	1413;5078;5728	2861;2862;10895;10896;12128;12129	2718;2719;2720;10521;10522;11678;11679	2718;10521;11678
SPAC227.18|lys3|I|saccharopine	SPAC227.18|lys3|I|saccharopine	6	6	6	>SPAC227.18|lys3|I|saccharopine dehydrogenase Lys3	1	6	6	6	6	6	6	6	6	6	21.5	21.5	21.5	41.392	368	368	0	39.66	By MS/MS	By MS/MS	21.5	21.5	65078000	29930000	35148000	31607000	31647000	4	6	10				188	833;1998;2440;2599;4430;5319	True;True;True;True;True;True	874;2084;2537;2703;4644;5566	1784;1785;4444;4445;5371;5372;5678;5679;9952;9953;11806;11807	1708;1709;4285;4286;4287;5137;5138;5429;5430;9619;11368	1709;4287;5137;5430;9619;11368
SPAC5D6.01|rps2202|I|40S;SPAC22A12.04c|rps2201|I|40S	SPAC5D6.01|rps2202|I|40S;SPAC22A12.04c|rps2201|I|40S	8;8	8;8	8;8	>SPAC5D6.01|rps2202|I|40S ribosomal protein S15a (predicted);>SPAC22A12.04c|rps2201|I|40S ribosomal protein S15a (predicted)	2	8	8	8	7	8	7	8	7	8	62.3	62.3	62.3	14.76	130	130;130	0	86.011	By MS/MS	By MS/MS	56.9	62.3	173160000	80395000	92761000	79779000	88562000	7	8	15				189	576;1475;1790;2101;2791;4584;4611;6361	True;True;True;True;True;True;True;True	600;1542;1866;2189;2904;4805;4833;6656	1251;3122;3123;4028;4029;4660;4661;6035;6036;10289;10290;10425;10426;13965;13966	1201;2978;2979;3884;4486;4487;5775;5776;9921;9922;10064;10065;10066;13449;13450	1201;2979;3884;4487;5776;9922;10066;13450
SPAC22A12.07c|ogm1|I|protein	SPAC22A12.07c|ogm1|I|protein	7	7	7	>SPAC22A12.07c|ogm1|I|protein O-mannosyltransferase Ogm1	1	7	7	7	5	5	5	5	5	5	10.3	10.3	10.3	101.33	893	893	0	40.044	By MS/MS	By MS/MS	7.2	8.1	35259000	16011000	19248000	16011000	0	4	3	7				190	27;2951;3388;3856;5228;6218;6683	True;True;True;True;True;True;True	27;3069;3527;4005;5472;6511;6988	49;6355;6356;7244;8159;11626;11627;13687;14661;14662	47;6081;6082;6951;7798;11203;13184;14137;14138	47;6082;6951;7798;11203;13184;14137
SPAC22A12.11|dak1|I|dihydroxyacetone	SPAC22A12.11|dak1|I|dihydroxyacetone	4	4	4	>SPAC22A12.11|dak1|I|dihydroxyacetone kinase Dak1	1	4	4	4	3	4	3	4	3	4	10.5	10.5	10.5	62.316	580	580	0	32.675	By MS/MS	By MS/MS	7.9	10.5	24872000	14289000	10583000	16183000	8139400	3	3	6				191	2077;2727;4310;5756	True;True;True;True	2164;2839;4519;6032	4610;5926;5927;9705;9706;12765;12766	4436;5668;5669;9392;12297;12298	4436;5668;9392;12297
SPAC22A12.15c|bip1|I|ER	SPAC22A12.15c|bip1|I|ER	15	14	14	>SPAC22A12.15c|bip1|I|ER heat shock protein BiP	1	15	14	14	15	14	14	13	14	13	25.6	24	24	73.226	663	663	0	107.96	By MS/MS	By MS/MS	25.6	24.1	158750000	80152000	78601000	78851000	75822000	11	9	20				192	607;1578;2377;2755;2799;3101;3620;4264;4489;4817;4861;5834;5953;6114;6115	True;True;True;True;True;True;True;True;True;True;True;False;True;True;True	635;1648;2472;2867;2912;3232;3764;4470;4706;5050;5096;6113;6235;6404;6405	1326;1327;3435;3436;5253;5254;5972;5973;6050;6051;6694;6695;7687;7688;9582;9583;10079;10080;10843;10844;10927;12929;12930;12931;13178;13179;13488;13489;13490;13491	1280;3302;3303;5021;5022;5708;5709;5710;5788;6420;6421;7353;7354;9273;9274;9734;9735;10473;10474;10548;12448;12449;12450;12684;12685;12988;12989;12990;12991	1280;3303;5022;5710;5788;6420;7353;9274;9734;10474;10548;12450;12684;12988;12990
SPAC22A12.16|acl2|I|ATP-citrate	SPAC22A12.16|acl2|I|ATP-citrate	10	10	10	>SPAC22A12.16|acl2|I|ATP-citrate synthase subunit 2 (predicted)	1	10	10	10	9	10	9	10	9	10	20.3	20.3	20.3	53.942	492	492	0	72.681	By MS/MS	By MS/MS	16.5	20.3	103820000	49134000	54690000	55294000	45691000	9	11	20				193	513;1641;2866;2929;3132;3622;3745;5681;5837;5994	True;True;True;True;True;True;True;True;True;True	535;1711;2980;3047;3263;3766;3892;5953;6116;6277	1139;1140;3553;3554;6182;6183;6314;6315;6751;6752;7690;7691;7924;7925;12615;12616;12935;12936;12937;12938;13255	1098;1099;3415;3416;5912;5913;6040;6041;6474;6475;7356;7357;7578;7579;12152;12454;12455;12456;12760;12761	1098;3416;5913;6041;6475;7357;7578;12152;12454;12760
SPAC22E12.05c|rer1|I|Rer1	SPAC22E12.05c|rer1|I|Rer1	1	1	1	>SPAC22E12.05c|rer1|I|Rer1 family protein (predicted)	1	1	1	1	1	1	1	1	1	1	6.5	6.5	6.5	22.386	184	184	0.0040404	6.5464	By matching	By MS/MS	6.5	6.5	4265700	1747100	2518600	0	2387900	0	1	1				194	474	TRUE	494	1060;1061	1024	1024
SPAC22E12.17c|glo3|I|ARF	SPAC22E12.17c|glo3|I|ARF	1	1	1	>SPAC22E12.17c|glo3|I|ARF GTPase activating protein (predicted)	1	1	1	1	1	1	1	1	1	1	2.9	2.9	2.9	52.583	483	483	0.007722	6.1692	By MS/MS	By MS/MS	2.9	2.9	10122000	5788200	4333700	0	4108800	0	0	0				195	1910	TRUE	1993	4266;4267	4124;4125	4124
SPAC22F3.06c|lon1|I|Lon	SPAC22F3.06c|lon1|I|Lon	3	3	3	>SPAC22F3.06c|lon1|I|Lon protease homolog Lon1 (predicted)	1	3	3	3	3	2	3	2	3	2	3.7	3.7	3.7	118.64	1067	1067	0	19.96	By MS/MS	By MS/MS	3.7	2.4	12273000	7094800	5178400	7094800	0	2	1	3				196	1103;3020;6156	True;True;True	1158;3147;6447	2350;2351;6532;13561;13562	2246;6260;13057;13058	2246;6260;13058
SPAC22F3.13|tsc1|I|hamartin	SPAC22F3.13|tsc1|I|hamartin	5	5	5	>SPAC22F3.13|tsc1|I|hamartin	1	5	5	5	4	5	4	5	4	5	5.1	5.1	5.1	103.43	899	899	0	34.427	By MS/MS	By MS/MS	4.1	5.1	26756000	12491000	14265000	14369000	10674000	4	5	9				197	743;2129;2150;2602;5679	True;True;True;True;True	778;2218;2240;2706;5951	1611;1612;4722;4770;4771;4772;5683;5684;12611;12612	1546;1547;4544;4589;4590;5433;5434;12148;12149	1546;4544;4590;5433;12149
SPAC22F8.05|SPAC22F8.05|I|alpha,alpha-trehalose-phosphate	SPAC22F8.05|SPAC22F8.05|I|alpha,alpha-trehalose-phosphate	3	3	3	>SPAC22F8.05|SPAC22F8.05|I|alpha,alpha-trehalose-phosphate synthase (predicted)	1	3	3	3	3	3	3	3	3	3	4	4	4	100.66	891	891	0	21.319	By MS/MS	By MS/MS	4	4	14535000	7352100	7183000	7323000	6839200	2	2	4				198	1575;2003;5981	True;True;True	1645;2089;6264	3429;3430;4455;4456;13232;13233	3297;3298;4296;4297;12734;12735	3297;4296;12735
SPAC22F8.08|sec24|I|COPII	SPAC22F8.08|sec24|I|COPII	13	13	13	>SPAC22F8.08|sec24|I|COPII cargo receptor Sec24/Sfb2 subunit	1	13	13	13	13	12	13	12	13	12	16.1	16.1	16.1	101.9	926	926	0	99.296	By MS/MS	By MS/MS	16.1	15.2	182010000	88745000	93264000	80792000	86080000	13	14	27				199	237;1523;1577;1926;2650;3952;3970;4115;4214;4442;4827;5159;5277	True;True;True;True;True;True;True;True;True;True;True;True;True	249;1592;1647;2010;2011;2756;4132;4159;4308;4413;4658;5061;5402;5522	581;582;3216;3217;3433;3434;4299;4300;4301;4302;5771;8653;8654;8711;8712;9266;9267;9465;9466;9981;9982;10864;10865;11497;11498;11721;11722;11723;11724	565;566;3064;3065;3300;3301;4152;4153;4154;5515;8312;8365;8366;8974;8975;8976;9163;9164;9644;10493;10494;11085;11086;11290;11291;11292;11293	565;3064;3301;4152;5515;8312;8366;8975;9164;9644;10493;11086;11293	67;68	261;880
SPAC22G7.06c|ura1|I|carbamoyl-phosphate	SPAC22G7.06c|ura1|I|carbamoyl-phosphate	43	43	43	>SPAC22G7.06c|ura1|I|carbamoyl-phosphate synthase (glutamine hydrolyzing), aspartate carbamoyltransferase Ura1	1	43	43	43	38	36	38	36	38	36	24.2	24.2	24.2	248.31	2244	2244	0	315.8	By MS/MS	By MS/MS	20.4	20.3	356150000	159220000	196930000	156280000	182340000	33	36	69				200	101;340;369;466;699;820;896;1014;1026;1042;1079;1158;1252;1694;1895;2052;2127;2156;2349;2431;2461;2531;2598;2890;2939;3043;3170;3252;3369;3684;3836;4448;4692;4793;4911;5225;5363;5633;5645;6000;6098;6174;6270	True;True;True;True;True;True;True;True;True;True;True;True;True;True;True;True;True;True;True;True;True;True;True;True;True;True;True;True;True;True;True;True;True;True;True;True;True;True;True;True;True;True;True	107;356;386;486;734;859;942;1064;1076;1095;1134;1215;1311;1767;1978;2139;2216;2246;2443;2528;2559;2631;2701;2702;3007;3057;3172;3303;3388;3507;3830;3985;4664;4917;5024;5147;5148;5469;5613;5902;5915;6283;6388;6466;6563	209;210;790;791;844;1043;1044;1525;1526;1758;1912;1913;2166;2167;2187;2188;2219;2306;2465;2466;2658;2659;3668;4241;4242;4560;4561;4719;4720;4782;4783;5194;5195;5355;5356;5410;5546;5547;5674;5675;5676;5677;6230;6231;6333;6334;6582;6583;6840;6996;6997;7206;7207;7809;7810;8120;8121;9991;9992;10585;10586;10797;11024;11025;11026;11027;11616;11617;11618;11889;11890;12518;12536;12537;13264;13265;13456;1…	200;201;770;771;818;1006;1007;1466;1467;1685;1828;1829;2075;2076;2094;2095;2122;2205;2206;2356;2357;2524;2525;3530;4098;4099;4387;4388;4542;4602;4603;4966;5118;5119;5175;5306;5307;5425;5426;5427;5428;5957;5958;6057;6058;6308;6309;6561;6710;6711;6914;6915;7466;7467;7761;9652;9653;10217;10424;10637;10638;10639;11194;11195;11196;11447;11448;12061;12077;12078;12768;12954;12955;13089;13267;13268	200;770;818;1007;1467;1685;1829;2075;2094;2122;2206;2357;2524;3530;4099;4388;4542;4603;4966;5119;5175;5307;5425;5958;6058;6308;6561;6711;6915;7466;7761;9652;10217;10424;10638;11194;11448;12061;12078;12768;12955;13089;13267	69;70;71	272;1960;2196
SPAC22G7.08|ppk8|I|serine/threonine	SPAC22G7.08|ppk8|I|serine/threonine	1	1	1	>SPAC22G7.08|ppk8|I|serine/threonine protein kinase Ppk8 (predicted)	1	1	1	1	1	0	1	0	1	0	1.6	1.6	1.6	58.546	513	513	0.0067633	6.1707	By MS/MS	By matching	1.6	0	6672100	6672100	0	6672100	0	0	0	0				201	1487	TRUE	1555	3147	3000	3000
SPAC22H10.12c|gdi1|I|GDP	SPAC22H10.12c|gdi1|I|GDP	1	1	1	>SPAC22H10.12c|gdi1|I|GDP dissociation inhibitor Gdi1 (predicted)	1	1	1	1	0	1	0	1	0	1	2.5	2.5	2.5	49.555	440	440	0.0030488	6.6347	By matching	By MS/MS	0	2.5	0	0	0	0	0	0	1	1				202	3398	TRUE	3537	7261	6967	6967
SPAC22H12.04c|rps102|I|40S	SPAC22H12.04c|rps102|I|40S	14	14	7	>SPAC22H12.04c|rps102|I|40S ribosomal protein S3a (predicted)	1	14	14	7	12	13	12	13	5	6	49.6	49.6	29.8	28.521	252	252	0	94.247	By MS/MS	By MS/MS	44.4	46.4	297320000	149700000	147620000	134100000	155010000	11	13	24				203	388;465;829;2542;2543;2544;3330;3383;3606;5647;5666;5869;6209;6344	True;True;True;True;True;True;True;True;True;True;True;True;True;True	405;485;870;2642;2643;2644;3468;3522;3750;5917;5938;6149;6502;6639	877;878;1041;1042;1776;5564;5565;5566;5567;5568;5569;7135;7136;7233;7234;7235;7236;7662;7663;12540;12541;12542;12586;12587;12998;12999;13671;13672;13925	849;850;1005;1702;5322;5323;5324;5325;5326;5327;6848;6849;6942;6943;6944;7332;12081;12082;12127;12128;12514;12515;13168;13169;13412	849;1005;1702;5323;5325;5327;6848;6943;7332;12081;12128;12515;13168;13412
SPAC23A1.03|apt1|I|adenine	SPAC23A1.03|apt1|I|adenine	1	1	1	>SPAC23A1.03|apt1|I|adenine phosphoribosyltransferase (APRT) (predicted)	1	1	1	1	1	1	1	1	1	1	5.9	5.9	5.9	20.746	188	188	0.0058651	6.2706	By matching	By MS/MS	5.9	5.9	3508500	1759400	1749100	0	1658300	0	1	1				204	1706	TRUE	1780	3692;3693	3554	3554
SPCC1322.15|rpl3402|III|60S;SPAC23A1.08c|rpl3401|I|60S	SPCC1322.15|rpl3402|III|60S;SPAC23A1.08c|rpl3401|I|60S	2;2	2;2	2;2	>SPCC1322.15|rpl3402|III|60S ribosomal protein L34;>SPAC23A1.08c|rpl3401|I|60S ribosomal protein L34	2	2	2	2	2	2	2	2	2	2	22.5	22.5	22.5	12.8	111	111;112	0	18.509	By MS/MS	By MS/MS	22.5	22.5	36175000	17782000	18393000	0	17438000	2	2	4				205	140;572	True;True	149;596	397;398;1242;1243	388;389;1193;1194	388;1193
SPCC794.09c|tef101|III|translation;SPBC839.15c|tef103|II|translation;SPAC23A1.10|tef102|I|translation	SPCC794.09c|tef101|III|translation;SPBC839.15c|tef103|II|translation;SPAC23A1.10|tef102|I|translation	25;25;25	25;25;25	25;25;25	>SPCC794.09c|tef101|III|translation elongation factor EF-1 alpha Ef1a-a;>SPBC839.15c|tef103|II|translation elongation factor EF-1 alpha Ef1a-c;>SPAC23A1.10|tef102|I|translation elongation factor EF-1 alpha Ef1a-b	3	25	25	25	24	25	24	25	24	25	55.4	55.4	55.4	49.66	460	460;460;460	0	275	By MS/MS	By MS/MS	55.4	55.4	13934000000	6410700000	7522800000	5754800000	6481300000	64	79	143				206	1001;1207;1208;1271;1321;1322;1748;1797;2437;3550;3880;3967;4339;4513;4603;5227;5243;5523;5524;5688;5840;5841;6392;6570;6571	True;True;True;True;True;True;True;True;True;True;True;True;True;True;True;True;True;True;True;True;True;True;True;True;True	1051;1265;1266;1331;1381;1382;1822;1873;2534;3694;4036;4037;4153;4154;4155;4549;4731;4825;5471;5487;5488;5784;5785;5961;5962;5963;6119;6120;6121;6687;6871;6872	2128;2129;2130;2131;2132;2133;2134;2135;2564;2565;2566;2567;2692;2693;2694;2695;2789;2790;2791;2792;2793;3768;3769;3770;3771;3772;3773;3774;3775;3776;3777;3778;3779;3780;3781;3782;3783;3784;3785;3786;3787;3788;3789;3790;3791;3792;3793;3794;3795;3796;3797;3798;3799;3800;3801;3802;3803;3804;3805;3806;3807;3808;3809;3810;3811;3812;3813;3814;3815;3816;3817;3818;3819;3820;4042;4043;4044;4045;4046;4047…	2037;2038;2039;2040;2041;2042;2043;2044;2439;2440;2441;2442;2555;2556;2557;2638;2639;2640;2641;3628;3629;3630;3631;3632;3633;3634;3635;3636;3637;3638;3639;3640;3641;3642;3643;3644;3645;3646;3647;3648;3649;3650;3651;3652;3653;3654;3655;3656;3657;3658;3659;3660;3661;3662;3663;3664;3665;3666;3667;3668;3669;3670;3671;3672;3673;3674;3675;3676;3677;3898;3899;3900;3901;3902;3903;3904;3905;3906;3907;5130…	2042;2440;2442;2555;2638;2641;3649;3906;5133;7242;7971;8358;9456;9771;9954;11199;11231;11795;11803;12167;12460;12463;13509;13908;13911	72;73;74;75;76;77;78	155;199;206;274;292;402;408
SPBC839.13c|rpl1601|II|60S;SPAC23A1.11|rpl1602|I|60S;SPBC2G2.05|rpl1603|II|60S	SPBC839.13c|rpl1601|II|60S;SPAC23A1.11|rpl1602|I|60S;SPBC2G2.05|rpl1603|II|60S	4;4;2	4;4;2	4;4;2	>SPBC839.13c|rpl1601|II|60S ribosomal protein L13/L16 (predicted);>SPAC23A1.11|rpl1602|I|60S ribosomal protein L13/L16 (predicted);>SPBC2G2.05|rpl1603|II|60S ribosomal protein L13/L16 (predicted)	3	4	4	4	3	4	3	4	3	4	24.4	24.4	24.4	22.17	197	197;197;197	0	32.365	By MS/MS	By MS/MS	14.2	24.4	119680000	54274000	65410000	62891000	53397000	4	4	8				207	567;1891;3663;6254	True;True;True;True	591;1974;3809;6547	1234;1235;1236;4234;7769;7770;13749;13750	1185;1186;1187;4090;7428;7429;13239;13240	1185;4090;7428;13240
SPAC23A1.12c|frs1|I|cytoplasmic	SPAC23A1.12c|frs1|I|cytoplasmic	8	8	8	>SPAC23A1.12c|frs1|I|cytoplasmic phenylalanine-tRNA ligase beta subunit Frs1 (predicted)	1	8	8	8	6	7	6	7	6	7	15.8	15.8	15.8	66.849	589	589	0	53.713	By MS/MS	By MS/MS	9.5	14.4	53870000	23959000	29912000	23136000	29182000	6	8	14				208	3439;4056;5168;5528;5909;6054;6584;6595	True;True;True;True;True;True;True;True	3578;4249;5411;5789;6190;6340;6887;6898	7340;9159;9160;11514;11515;12263;12264;13074;13075;13368;14447;14448;14471	7039;8875;8876;11100;11101;11811;11812;12588;12589;12590;12868;13938;13939;13959	7039;8876;11100;11811;12590;12868;13939;13959
SPAC23A1.14c|SPAC23A1.14c|I|uncharacterised	SPAC23A1.14c|SPAC23A1.14c|I|uncharacterised	3	3	3	>SPAC23A1.14c|SPAC23A1.14c|I|uncharacterised trans-sulfuration enzyme (predicted)	1	3	3	3	3	3	3	3	3	3	10.8	10.8	10.8	43.284	398	398	0	19.728	By MS/MS	By MS/MS	10.8	10.8	23044000	13276000	9767900	12310000	10227000	2	1	3				209	549;2209;3705	True;True;True	572;2300;3851	1202;1203;4925;4926;7847;7848	1156;1157;4729;7503;7504	1157;4729;7503
SPAC23A1.17|bbc1|I|WIP	SPAC23A1.17|bbc1|I|WIP	7	7	7	>SPAC23A1.17|bbc1|I|WIP family cytoskeletal protein Bbc1 (predicted)	1	7	7	7	5	7	5	7	5	7	8.8	8.8	8.8	170.53	1611	1611	0	65.9	By MS/MS	By MS/MS	6.4	8.8	62183000	23887000	38296000	26148000	34047000	5	9	14				210	553;2960;4290;4314;4590;5184;5821	True;True;True;True;True;True;True	576;577;3078;4496;4524;4811;5427;6100	1210;1211;6373;9633;9634;9714;9715;10299;10300;11542;11543;12908	1164;1165;6096;6097;9319;9320;9401;9402;9930;9931;11127;11128;11129;12428	1165;6096;9320;9401;9930;11128;12428	79	1475
SPBP4H10.13|rps2302|II|40S;SPAC23C11.02c|rps23|I|40S	SPBP4H10.13|rps2302|II|40S;SPAC23C11.02c|rps23|I|40S	4;4	4;4	4;4	>SPBP4H10.13|rps2302|II|40S ribosomal protein S23 (predicted);>SPAC23C11.02c|rps23|I|40S ribosomal protein S23 (predicted)	2	4	4	4	4	4	4	4	4	4	37.8	37.8	37.8	15.655	143	143;143	0	37.495	By MS/MS	By MS/MS	37.8	37.8	99029000	44818000	54211000	45012000	51203000	5	3	8				211	3400;5746;6169;6290	True;True;True;True	3539;6021;6461;6584	7264;7265;12743;12744;12745;12746;13586;13587;13818;13819	6970;6971;12275;12276;12277;12278;13079;13080;13307	6970;12277;13079;13307
SPAC23C11.05|ipp1|I|inorganic	SPAC23C11.05|ipp1|I|inorganic	6	6	6	>SPAC23C11.05|ipp1|I|inorganic pyrophosphatase Ipp1 (predicted)	1	6	6	6	5	6	5	6	5	6	22.5	22.5	22.5	32.467	289	289	0	39.675	By MS/MS	By MS/MS	20.1	22.5	33895000	16593000	17301000	18824000	14172000	5	5	10				212	478;913;2180;4052;5470;5965	True;True;True;True;True;True	499;959;2270;4244;5724;6248	1069;1070;1952;1953;4830;9149;9150;12119;12120;13201;13202	1032;1033;1866;1867;4643;8866;11670;11671;12708;12709	1032;1866;4643;8866;11671;12709
SPAC23C11.09|ala1|I|mitochondrial	SPAC23C11.09|ala1|I|mitochondrial	3	3	3	>SPAC23C11.09|ala1|I|mitochondrial and cytoplasmic alanine-tRNA ligase Ala1 (predicted)	1	3	3	3	3	2	3	2	3	2	3.8	3.8	3.8	107.38	959	959	0	19.46	By MS/MS	By MS/MS	3.8	2.2	8514400	3673900	4840500	3689800	4573300	2	1	3				213	343;1377;5628	True;True;True	359;1440;5896	795;796;2910;2911;12507	775;2768;12049	775;2768;12049
SPAC23C11.11|cka1|I|serine/threonine	SPAC23C11.11|cka1|I|serine/threonine	3	3	3	>SPAC23C11.11|cka1|I|serine/threonine protein kinase Cka1	1	3	3	3	3	1	3	1	3	1	8.7	8.7	8.7	39.527	332	332	0	19.401	By MS/MS	By matching	8.7	2.1	9539500	6058700	3480800	6058700	0	3	0	3				214	1878;4984;6590	True;True;True	1959;5223;6893	4212;11173;14462;14463	4068;10779;13951	4068;10779;13951
SPAC23C11.13c|hpt1|I|xanthine	SPAC23C11.13c|hpt1|I|xanthine	2	2	2	>SPAC23C11.13c|hpt1|I|xanthine phosphoribosyltransferase (predicted)	1	2	2	2	2	1	2	1	2	1	14.6	14.6	14.6	23.572	206	206	0	11.521	By MS/MS	By MS/MS	14.6	3.9	4052100	2766400	1285700	2766400	0	1	1	2				215	2541;5656	True;True	2641;5927	5563;12560;12561	5321;12101;12102	5321;12101
SPAC23C11.14|zhf1|I|zinc	SPAC23C11.14|zhf1|I|zinc	3	3	3	>SPAC23C11.14|zhf1|I|zinc ion transmembrane transporter Zhf1	1	3	3	3	3	2	3	2	3	2	7.5	7.5	7.5	42.941	387	387	0	22.484	By MS/MS	By MS/MS	7.5	5.7	49851000	27260000	22591000	23916000	24762000	3	2	5				216	4732;6630;6643	True;True;True	4958;6934;6947	10663;10664;14551;14578;14579	10288;10289;14038;14065;14066	10288;14038;14065
SPAC23C11.16|plo1|I|Polo	SPAC23C11.16|plo1|I|Polo	27	27	27	>SPAC23C11.16|plo1|I|Polo kinase Plo1	1	27	27	27	26	26	26	26	26	26	42.2	42.2	42.2	77.301	683	683	0	237.81	By MS/MS	By MS/MS	42	42.2	530940000	266640000	264300000	239820000	236030000	25	30	55				217	383;449;1174;1204;2426;2427;2577;2900;3253;3652;3653;3671;3955;4119;4252;4766;4788;5027;5042;5345;5836;5969;6029;6234;6359;6398;6536	True;True;True;True;True;True;True;True;True;True;True;True;True;True;True;True;True;True;True;True;True;True;True;True;True;True;True	400;469;1231;1262;2523;2524;2680;3017;3389;3390;3798;3799;3817;4137;4312;4456;4457;4458;4993;5016;5266;5267;5282;5593;6115;6252;6313;6527;6654;6693;6835;6836	868;869;999;1000;2495;2496;2558;2559;5345;5346;5635;5636;6253;6254;6255;6256;6998;6999;7000;7749;7750;7751;7752;7753;7784;7785;8663;8664;9273;9274;9550;9551;9552;9553;9554;9555;10733;10734;10780;10781;11245;11246;11247;11248;11276;11277;11854;11855;12933;12934;13209;13210;13318;13319;13714;13715;13961;13962;14034;14035;14343;14344;14345;14346;14347;14348	840;841;968;969;2382;2383;2434;2435;5107;5108;5387;5388;5977;5978;5979;6712;6713;6714;7409;7410;7411;7412;7413;7445;8322;8323;8982;8983;9244;9245;9246;9247;9248;9249;10360;10361;10405;10406;10846;10847;10848;10876;11414;11415;12452;12453;12715;12716;12823;12824;13210;13446;13517;13838;13839;13840;13841;13842;13843	841;969;2382;2435;5107;5108;5388;5979;6714;7410;7411;7445;8323;8983;9245;10360;10405;10847;10876;11414;12453;12715;12823;13210;13446;13517;13843	80;81;82;83;84;85	126;145;170;189;597;600
SPAC23C4.02|crn1|I|actin	SPAC23C4.02|crn1|I|actin	1	1	1	>SPAC23C4.02|crn1|I|actin binding protein, coronin Crn1	1	1	1	1	1	1	1	1	1	1	1.5	1.5	1.5	67.015	601	601	0.0021231	7.2065	By MS/MS	By MS/MS	1.5	1.5	1949600	1949600	0	1949600	0	1	1	2				218	6257	TRUE	6550	13754;13755	13244;13245	13244
SPAC23C4.05c|SPAC23C4.05c|I|LEA	SPAC23C4.05c|SPAC23C4.05c|I|LEA	1	1	1	>SPAC23C4.05c|SPAC23C4.05c|I|LEA domain protein	1	1	1	1	0	1	0	1	0	1	2.3	2.3	2.3	49.532	431	431	0.0067698	6.1832	By matching	By MS/MS	0	2.3	3271100	0	3271100	0	3101300	0	1	1				219	4091	TRUE	4284	9221	8934	8934
SPAC23C4.12|hhp2|I|serine/threonine	SPAC23C4.12|hhp2|I|serine/threonine	13	13	11	>SPAC23C4.12|hhp2|I|serine/threonine protein kinase Hhp2	1	13	13	11	13	13	13	13	11	11	40.8	40.8	36	45.831	400	400	0	103.95	By MS/MS	By MS/MS	40.8	40.8	551040000	260900000	290130000	262520000	245560000	15	16	31				220	692;1843;1866;1919;2104;2212;2451;4164;4536;4651;5118;5445;5683	True;True;True;True;True;True;True;True;True;True;True;True;True	726;727;1920;1945;2003;2193;2303;2548;4359;4756;4876;5358;5699;5955	1510;1511;1512;1513;4138;4139;4182;4183;4184;4185;4285;4286;4670;4671;4931;4932;5391;5392;9357;9358;10194;10195;10196;10197;10509;10510;11416;11417;12055;12056;12057;12058;12059;12619;12620	1454;1455;1456;3989;3990;4029;4030;4031;4032;4140;4141;4494;4495;4733;4734;4735;5157;5158;9064;9840;9841;9842;9843;10148;10149;11007;11008;11612;11613;11614;11615;11616;12155;12156	1454;3989;4032;4140;4494;4733;5157;9064;9840;10149;11008;11615;12156	86	139
SPAC23C4.15|rpb5|I|DNA-directed	SPAC23C4.15|rpb5|I|DNA-directed	1	1	1	>SPAC23C4.15|rpb5|I|DNA-directed RNA polymerase I, II and III subunit Rpb5	1	1	1	1	1	0	1	0	1	0	5.7	5.7	5.7	23.915	210	210	0.0059347	6.3089	By MS/MS	By matching	5.7	0	789540	789540	0	789540	0	1	0	1				221	5404	TRUE	5657	11976	11536	11536
SPAC23C4.18c|rad4|I|BRCT	SPAC23C4.18c|rad4|I|BRCT	2	2	2	>SPAC23C4.18c|rad4|I|BRCT domain protein Rad4	1	2	2	2	1	2	1	2	1	2	3.5	3.5	3.5	74.168	648	648	0	12.759	By MS/MS	By MS/MS	1.5	3.5	5699600	2460400	3239200	0	3071000	1	1	2				222	2679;4163	True;True	2786;4358	5831;5832;9356	5572;9063	5572;9063
SPAC23D3.04c|gpd2|I|glycerol-3-phosphate	SPAC23D3.04c|gpd2|I|glycerol-3-phosphate	7	7	7	>SPAC23D3.04c|gpd2|I|glycerol-3-phosphate dehydrogenase Gpd2	1	7	7	7	7	6	7	6	7	6	29.5	29.5	29.5	40.874	373	373	0	60.787	By MS/MS	By MS/MS	29.5	24.9	52541000	28503000	24038000	26866000	24427000	6	5	11				223	1297;4096;4786;5417;5476;6073;6141	True;True;True;True;True;True;True	1357;4289;5014;5670;5731;6363;6431	2748;9229;9230;10774;10775;10776;10777;11999;12000;12134;12135;13409;13410;13535;13536	2602;8941;8942;10400;10401;10402;11559;11683;11684;12907;12908;12909;12910;13032;13033	2602;8942;10402;11559;11683;12909;13032
SPAC23D3.06c|nup146|I|nucleoporin	SPAC23D3.06c|nup146|I|nucleoporin	14	14	14	>SPAC23D3.06c|nup146|I|nucleoporin Nup146	1	14	14	14	8	14	8	14	8	14	12.5	12.5	12.5	145.78	1325	1325	0	130.71	By MS/MS	By MS/MS	6.7	12.5	111800000	24336000	87463000	32813000	74446000	3	14	17				224	299;429;1371;1424;2246;2306;3108;3164;4039;4127;4228;4461;5012;5051	True;True;True;True;True;True;True;True;True;True;True;True;True;True	313;448;1434;1490;2337;2398;3239;3295;4231;4320;4431;4677;5251;5291	704;705;957;2901;2902;3029;3030;5002;5111;5112;6708;6709;6808;9128;9287;9288;9507;10018;10019;11219;11292;11293	690;925;2760;2886;4794;4893;6434;6435;6527;8845;8996;8997;8998;9205;9676;9677;10823;10888;10889	690;925;2760;2886;4794;4893;6435;6527;8845;8996;9205;9677;10823;10889
SPAC23E2.01|fep1|I|iron-sensing	SPAC23E2.01|fep1|I|iron-sensing	1	1	1	>SPAC23E2.01|fep1|I|iron-sensing transcription factor Fep1	1	1	1	1	1	1	1	1	1	1	2	2	2	60.611	564	564	0.0023175	8.5487	By matching	By MS/MS	2	2	12037000	5713600	6323500	0	5995200	0	1	1				225	4318	TRUE	4528	9722;9723	9412	9412
SPAC23E2.03c|ste7|I|arrestin	SPAC23E2.03c|ste7|I|arrestin	1	1	1	>SPAC23E2.03c|ste7|I|arrestin family meiotic suppressor protein Ste7	1	1	1	1	0	1	0	1	0	1	1.2	1.2	1.2	61.101	569	569	0.0058881	6.2888	By matching	By MS/MS	0	1.2	3668200	0	3668200	0	3477700	0	1	1				226	4863	TRUE	5098	10931	10552	10552
SPAC23G3.01|rpb2|I|RNA	SPAC23G3.01|rpb2|I|RNA	23	23	23	>SPAC23G3.01|rpb2|I|RNA polymerase II complex subunit Rpb2	1	23	23	23	17	23	17	23	17	23	22.6	22.6	22.6	137.85	1210	1210	0	173.21	By MS/MS	By MS/MS	16.5	22.6	235750000	89989000	145760000	104460000	123720000	11	25	36				227	29;132;477;961;1010;2320;3117;3173;3747;4170;4378;4725;4733;4787;5085;5325;5870;5911;5945;6137;6144;6373;6632	True;True;True;True;True;True;True;True;True;True;True;True;True;True;True;True;True;True;True;True;True;True;True	29;140;498;1009;1060;2414;3248;3307;3894;4365;4366;4589;4590;4950;4959;5015;5325;5572;6150;6192;6226;6427;6434;6668;6936	52;53;382;1068;2046;2047;2157;5140;5141;6726;6727;6845;6846;7928;7929;9366;9367;9368;9842;9843;9844;9845;10651;10665;10778;10779;11353;11354;11815;13000;13001;13077;13078;13146;13147;13527;13528;13539;13540;13987;13988;14554;14555;14556;14557	50;374;1031;1959;1960;2067;4917;6451;6452;6566;6567;7581;7582;9072;9073;9074;9521;9522;9523;9524;10277;10290;10403;10404;10947;11376;12516;12592;12593;12654;13024;13025;13036;13037;13470;14041;14042;14043;14044	50;374;1031;1959;2067;4917;6452;6566;7581;9073;9524;10277;10290;10404;10947;11376;12516;12593;12654;13025;13037;13470;14043	87;88	119;767
SPAC23G3.02c|sib1|I|ferrichrome	SPAC23G3.02c|sib1|I|ferrichrome	2	2	2	>SPAC23G3.02c|sib1|I|ferrichrome synthetase Sib1	1	2	2	2	1	2	1	2	1	2	0.4	0.4	0.4	559.84	4924	4924	0	10.997	By matching	By MS/MS	0.2	0.4	1142100	531720	610400	0	578710	0	1	1				228	2471;3701	True;True	2569;3847	5427;7840;7841	5193;7496	5193;7496
SPAC23G3.03|sib2|I|ornithine	SPAC23G3.03|sib2|I|ornithine	3	3	3	>SPAC23G3.03|sib2|I|ornithine N5 monooxygenase (predicted)	1	3	3	3	2	2	2	2	2	2	12.5	12.5	12.5	48.582	431	431	0	22.464	By MS/MS	By MS/MS	7	10	13437000	1294300	12143000	0	11512000	2	1	3				229	791;1076;6285	True;True;True	829;1131;6579	1706;1707;2302;13810	1635;1636;2201;13298	1635;2201;13298
SPAC23G3.05c|SPAC23G3.05c|I|regulator	SPAC23G3.05c|SPAC23G3.05c|I|regulator	3	3	3	>SPAC23G3.05c|SPAC23G3.05c|I|regulator of G-protein signaling (RGS) domain (predicted)	1	3	3	3	0	3	0	3	0	3	14	14	14	39.695	343	343	0	29.921	By matching	By MS/MS	0	14	31429000	0	31429000	0	29798000	0	3	3				230	3181;3893;4150	True;True;True	3315;4055;4343	6861;8378;9330	6583;8024;9037	6583;8024;9037	89	156
SPAC23G3.06|nop58|I|U3	SPAC23G3.06|nop58|I|U3	11	11	11	>SPAC23G3.06|nop58|I|U3 snoRNP protein Nop58 (predicted)	1	11	11	11	10	11	10	11	10	11	36	36	36	55.758	508	508	0	93.449	By MS/MS	By MS/MS	30.1	36	201450000	120460000	80984000	88995000	77862000	10	11	21				231	412;611;1013;1340;1550;3290;3665;3932;5179;5800;6120	True;True;True;True;True;True;True;True;True;True;True	431;639;1063;1400;1620;3427;3811;4109;4110;5422;6078;6410	925;926;1333;1334;2164;2165;2837;2838;3266;7064;7065;7773;7774;8608;8609;8610;8611;11532;11533;12862;12863;12864;13498;13499	893;894;1286;2073;2074;2696;3110;6780;6781;7432;7433;8265;8266;8267;8268;8269;11118;12389;12390;12997;12998	894;1286;2073;2696;3110;6781;7433;8266;11118;12389;12997	90;91	182;280
SPAC23G3.07c|snf30|I|SWI/SNF	SPAC23G3.07c|snf30|I|SWI/SNF	1	1	1	>SPAC23G3.07c|snf30|I|SWI/SNF complex subunit Snf30	1	1	1	1	1	0	1	0	1	0	4.7	4.7	4.7	30.423	274	274	0.0022124	7.6517	By MS/MS	By matching	4.7	0	2630600	2630600	0	2630600	0	1	0	1				232	346	TRUE	362	800	778	778
SPAC23G3.10c|ssr3|I|SWI/SNF	SPAC23G3.10c|ssr3|I|SWI/SNF	3	3	3	>SPAC23G3.10c|ssr3|I|SWI/SNF and RSC complex subunit Ssr3	1	3	3	3	3	3	3	3	3	3	5.9	5.9	5.9	49.759	425	425	0	19.361	By MS/MS	By MS/MS	5.9	5.9	25783000	12196000	13587000	14265000	10813000	2	2	4				233	121;1307;2283	True;True;True	129;1367;2375	363;364;2766;2767;5070;5071	355;356;2618;4853	355;2618;4853
SPAC23G3.11|rpn6|I|19S	SPAC23G3.11|rpn6|I|19S	3	3	3	>SPAC23G3.11|rpn6|I|19S proteasome regulatory subunit Rpn6 (predicted)	1	3	3	3	3	3	3	3	3	3	13.1	13.1	13.1	47.341	421	421	0	34.999	By MS/MS	By MS/MS	13.1	13.1	42262000	20639000	21622000	24460000	16679000	3	3	6				234	4921;5762;5842	True;True;True	5159;6038;6122	11042;11043;12777;12778;12951;12952	10655;10656;12307;12308;12469;12470	10655;12307;12470
SPAC23H3.09c|gly1|I|threonine	SPAC23H3.09c|gly1|I|threonine	5	5	5	>SPAC23H3.09c|gly1|I|threonine aldolase Gly1 (predicted)	1	5	5	5	5	4	5	4	5	4	15.7	15.7	15.7	41.318	376	376	0	32.658	By MS/MS	By MS/MS	15.7	13.3	24025000	13864000	10161000	12757000	10741000	5	4	9				235	1667;2780;2921;4892;4918	True;True;True;True;True	1739;2892;3039;5128;5156	3607;3608;6013;6014;6300;6301;10988;11037;11038	3468;3469;5748;5749;6028;6029;10607;10648;10649	3469;5749;6028;10607;10649
SPAC23H3.10|ssr2|I|SWI/SNF	SPAC23H3.10|ssr2|I|SWI/SNF	3	3	3	>SPAC23H3.10|ssr2|I|SWI/SNF and RSC complex subunit Ssr2	1	3	3	3	2	2	2	2	2	2	5.8	5.8	5.8	57.684	503	503	0	16.479	By MS/MS	By MS/MS	4.4	2.8	8428100	6649500	1778700	6649500	0	1	2	3				236	2917;3915;5788	True;True;True	3035;4084;6064	6294;8437;8438;12838	6023;8076;8077;12366	6023;8076;12366
SPAC23H3.13c|gpa2|I|heterotrimeric	SPAC23H3.13c|gpa2|I|heterotrimeric	1	1	1	>SPAC23H3.13c|gpa2|I|heterotrimeric G protein alpha-2 subunit Gpa2	1	1	1	1	1	1	1	1	1	1	3.1	3.1	3.1	40.522	354	354	0.0086622	6.1526	By matching	By MS/MS	3.1	3.1	8519000	4923500	3595500	0	3408800	0	1	1				237	2267	TRUE	2359	5043;5044	4830	4830
SPAC23H4.06|gln1|I|glutamate-ammonia	SPAC23H4.06|gln1|I|glutamate-ammonia	4	4	4	>SPAC23H4.06|gln1|I|glutamate-ammonia ligase Gln1	1	4	4	4	3	2	3	2	3	2	14.8	14.8	14.8	40.018	359	359	0	27.418	By MS/MS	By MS/MS	12.5	6.4	10258000	5240600	5017000	5240600	0	3	2	5				238	227;2145;2271;4693	True;True;True;True	238;2235;2363;4918	559;4756;4757;5051;10587	544;4573;4574;4835;10218	544;4573;4835;10218	92	356
SPAC23H4.09|cdb4|I|curved	SPAC23H4.09|cdb4|I|curved	3	3	3	>SPAC23H4.09|cdb4|I|curved DNA-binding protein Cdb4, peptidase family	1	3	3	3	2	2	2	2	2	2	9.4	9.4	9.4	41.597	381	381	0	19.423	By MS/MS	By MS/MS	7.1	5.2	2949800	2331900	617940	2331900	0	1	2	3				239	1370;2983;4615	True;True;True	1433;3104;4837	2900;6441;10431;10432	2759;6165;10071	2759;6165;10071
SPAC24B11.06c|sty1|I|MAP	SPAC24B11.06c|sty1|I|MAP	9	9	8	>SPAC24B11.06c|sty1|I|MAP kinase Sty1	1	9	9	8	8	9	8	9	7	8	31.2	31.2	28.9	40.222	349	349	0	68.641	By MS/MS	By MS/MS	25.2	31.2	69844000	32154000	37690000	33653000	34234000	4	9	13				240	390;1605;1617;2316;2665;3469;3922;5610;6604	True;True;True;True;True;True;True;True;True	408;1675;1687;2410;2771;3609;4093;5877;6908	883;884;3486;3487;3510;3511;5133;5134;5796;5797;7399;8452;8453;12475;12476;14493;14494	855;856;3354;3355;3356;3377;3378;4910;4911;4912;5538;7093;8088;12018;13978;13979	855;3354;3378;4910;5538;7093;8088;12018;13979
SPAC24B11.11c|sid2|I|NDR	SPAC24B11.11c|sid2|I|NDR	6	6	6	>SPAC24B11.11c|sid2|I|NDR kinase Sid2	1	6	6	6	4	6	4	6	4	6	10.4	10.4	10.4	70.491	607	607	0	41.778	By MS/MS	By MS/MS	8.2	10.4	24139000	7552800	16587000	9689700	13589000	3	7	10				241	738;3182;3183;3564;3692;3979	True;True;True;True;True;True	773;3316;3317;3708;3838;4168	1602;1603;6862;6863;6864;7581;7582;7822;8729;8730	1536;1537;1538;6584;6585;6586;7264;7265;7479;8383;8384	1536;6584;6586;7265;7479;8383
SPAC24C9.06c|aco1|I|aconitate	SPAC24C9.06c|aco1|I|aconitate	7	7	7	>SPAC24C9.06c|aco1|I|aconitate hydratase Aco1 (predicted)	1	7	7	7	5	6	5	6	5	6	10.6	10.6	10.6	86.112	789	789	0	43.68	By MS/MS	By MS/MS	7.9	8.6	69830000	31423000	38407000	31987000	35849000	3	6	9				242	1000;3503;4445;4998;5744;6363;6529	True;True;True;True;True;True;True	1050;3645;4661;5237;6019;6658;6827	2126;2127;7464;9987;11194;11195;12738;13969;13970;14328;14329	2036;7152;9648;10800;12272;13453;13454;13455;13823;13824	2036;7152;9648;10800;12272;13455;13823
SPAC24C9.12c|shm1|I|serine	SPAC24C9.12c|shm1|I|serine	24	24	23	>SPAC24C9.12c|shm1|I|serine hydroxymethyltransferase Shm1 (predicted)	1	24	24	23	24	23	24	23	23	22	59.5	59.5	57.6	51.86	467	467	0	212.19	By MS/MS	By MS/MS	59.5	57.6	1367600000	635500000	732140000	609670000	634780000	29	31	60				243	269;349;517;1156;1214;1399;1655;1705;1870;2596;2699;3011;3229;3483;3484;4740;5171;5186;5790;5819;5907;5990;6211;6608	True;True;True;True;True;True;True;True;True;True;True;True;True;True;True;True;True;True;True;True;True;True;True;True	282;365;539;540;1213;1272;1464;1725;1726;1779;1950;2699;2809;2810;3137;3138;3365;3623;3624;4966;5414;5429;6066;6098;6188;6273;6504;6912	646;647;803;804;1148;1149;1150;2461;2462;2578;2579;2580;2982;2983;3579;3580;3581;3582;3689;3690;3691;4194;4195;5670;5671;5875;5876;5877;6507;6508;6509;6510;6511;6512;6513;6950;6951;7421;7422;7423;7424;7425;7426;10676;10677;11520;11521;11546;11547;12841;12842;12903;12904;12905;12906;13071;13247;13248;13674;13675;14500;14501	628;629;781;782;1107;1108;2354;2450;2451;2452;2839;2840;2841;3440;3441;3442;3443;3551;3552;3553;4044;4045;5422;5423;5613;5614;5615;6236;6237;6238;6239;6240;6241;6242;6664;6665;7112;7113;7114;7115;7116;7117;7118;10300;10301;11106;11107;11108;11131;12369;12370;12423;12424;12425;12426;12585;12750;12751;12752;13171;13172;13985;13986	629;782;1108;2354;2450;2841;3440;3553;4045;5422;5615;6237;6665;7113;7118;10301;11106;11131;12370;12426;12585;12752;13172;13985	93;94;95;96	48;156;252;343
SPAC24H6.04|hxk1|I|hexokinase	SPAC24H6.04|hxk1|I|hexokinase	7	7	7	>SPAC24H6.04|hxk1|I|hexokinase 1	1	7	7	7	6	6	6	6	6	6	16.3	16.3	16.3	53.597	484	484	0	48.092	By MS/MS	By MS/MS	15.1	14	65737000	34911000	30826000	33819000	30318000	6	6	12				244	352;695;1618;3068;3607;5007;5498	True;True;True;True;True;True;True	368;730;1688;3197;3751;5246;5758	808;809;810;1517;1518;3512;3513;6631;7664;7665;11211;12194;12195	786;787;1459;1460;3379;3380;6357;7333;7334;10815;11744;11745	787;1460;3380;6357;7333;10815;11745
SPAC24H6.05|cdc25|I|M	SPAC24H6.05|cdc25|I|M	2	2	2	>SPAC24H6.05|cdc25|I|M phase inducer tyrosine phosphatase Cdc25	1	2	2	2	1	2	1	2	1	2	3.5	3.5	3.5	66.565	596	596	0	13.444	By MS/MS	By MS/MS	1.3	3.5	3143800	674400	2469400	0	2341200	1	2	3				245	2175;2757	True;True	2265;2869	4820;4821;5975	4634;4635;5712	4635;5712
SPAC24H6.07|rps901|I|40S	SPAC24H6.07|rps901|I|40S	13	13	1	>SPAC24H6.07|rps901|I|40S ribosomal protein S9	1	13	13	1	13	13	13	13	1	1	50.8	50.8	4.2	22.161	191	191	0	96.511	By MS/MS	By MS/MS	50.8	50.8	752310000	362650000	389650000	352200000	352940000	15	15	30				246	1107;1108;2111;2366;3038;3137;3184;3243;3596;3904;4480;4688;5761	True;True;True;True;True;True;True;True;True;True;True;True;True	1162;1163;2200;2461;3166;3268;3318;3379;3740;4067;4068;4696;4913;6037	2358;2359;2360;2361;2362;2363;4688;4689;5230;5231;6569;6570;6760;6761;6865;6866;6979;6980;6981;7643;7644;8400;8401;8402;8403;10051;10052;10579;10580;12775;12776	2253;2254;2255;2256;2257;2258;2259;4512;4513;5002;5003;6296;6297;6482;6483;6587;6588;6694;6695;7317;7318;8041;8042;8043;8044;9708;9709;10211;10212;12305;12306	2256;2258;4513;5003;6296;6483;6588;6694;7318;8041;9709;10212;12305	97	91
SPAC24H6.10c|SPAC24H6.10c|I|phospho-2-dehydro-3-deoxyheptonate	SPAC24H6.10c|SPAC24H6.10c|I|phospho-2-dehydro-3-deoxyheptonate	2	2	2	>SPAC24H6.10c|SPAC24H6.10c|I|phospho-2-dehydro-3-deoxyheptonate aldolase (predicted)	1	2	2	2	1	2	1	2	1	2	7.9	7.9	7.9	39.76	368	368	0	12.102	By MS/MS	By MS/MS	3.5	7.9	7603500	2933600	4669900	0	4427500	1	2	3				247	1059;1825	True;True	1112;1902	2263;2264;4105	2163;2164;3958	2164;3958
SPAC25A8.01c|fft3|I|SMARCAD1	SPAC25A8.01c|fft3|I|SMARCAD1	2	2	2	>SPAC25A8.01c|fft3|I|SMARCAD1 family ATP-dependent DNA helicase Fft3	1	2	2	2	1	2	1	2	1	2	2.6	2.6	2.6	104.5	922	922	0	12.794	By MS/MS	By MS/MS	1.2	2.6	3122200	1347400	1774800	0	1682600	1	2	3				248	5188;6014	True;True	5431;6297	11549;11550;13289	11133;11134;12791	11133;12791
SPAC25B8.04c|mss51|I|mitochondrial	SPAC25B8.04c|mss51|I|mitochondrial	1	1	1	>SPAC25B8.04c|mss51|I|mitochondrial splicing suppressor Mss51 (predicted)	1	1	1	1	1	1	1	1	1	1	4.2	4.2	4.2	43.599	378	378	0.002291	8.1909	By MS/MS	By MS/MS	4.2	4.2	9386700	4957800	4428900	0	4199000	1	1	2				249	3205	TRUE	3340	6906;6907	6623;6624	6624
SPAC25B8.12c|SPAC25B8.12c|I|unknown	SPAC25B8.12c|SPAC25B8.12c|I|unknown	2	2	2	>SPAC25B8.12c|SPAC25B8.12c|I|unknown HAD superfamily hydrolase	1	2	2	2	1	2	1	2	1	2	9.2	9.2	9.2	33.85	303	303	0	13.518	By MS/MS	By MS/MS	4.6	9.2	17089000	7660100	9429300	0	8939800	1	2	3				250	3874;5898	True;True	4026;6178	8196;13050;13051	7837;12562;12563	7837;12563
SPCC285.15c|rps2802|III|40S;SPAC25G10.06|rps2801|I|40S	SPCC285.15c|rps2802|III|40S;SPAC25G10.06|rps2801|I|40S	1;1	1;1	1;1	>SPCC285.15c|rps2802|III|40S ribosomal protein S28, Rps2802;>SPAC25G10.06|rps2801|I|40S ribosomal protein S28 (predicted)	2	1	1	1	1	1	1	1	1	1	23.5	23.5	23.5	7.6638	68	68;68	0.0022624	7.9002	By MS/MS	By MS/MS	23.5	23.5	7987800	4518300	3469600	0	3289400	1	1	2				251	1889	TRUE	1972	4230;4231	4086;4087	4086
SPAC25G10.08|SPAC25G10.08|I|translation	SPAC25G10.08|SPAC25G10.08|I|translation	17	17	17	>SPAC25G10.08|SPAC25G10.08|I|translation initiation factor eIF3b (p84)	1	17	17	17	15	17	15	17	15	17	28	28	28	84.034	725	725	0	143.95	By MS/MS	By MS/MS	24.7	28	202480000	82891000	119590000	94001000	102270000	13	14	27				252	148;794;1283;1448;2128;2335;3175;3533;4076;4130;5200;5757;5967;6167;6195;6548;6662	True;True;True;True;True;True;True;True;True;True;True;True;True;True;True;True;True	158;832;1343;1514;2217;2429;3309;3677;4269;4323;5444;6033;6250;6459;6487;6848;6966	414;415;1710;1711;2722;3075;3076;4721;5168;5169;6850;6851;7524;7525;9197;9198;9293;9294;11571;11572;12767;12768;13205;13206;13582;13583;13633;13634;14369;14370;14618;14619	405;406;1639;1640;2580;2932;2933;4543;4942;4943;6571;6572;7213;7214;8912;8913;9001;9002;11150;11151;12299;12300;12711;12712;13075;13076;13125;13126;13863;13864;14104	406;1640;2580;2933;4543;4942;6571;7214;8912;9002;11150;12300;12712;13076;13126;13863;14104
SPAC3A12.10|rpl2001|I|60S;SPAC26A3.04|rpl2002|I|60S	SPAC3A12.10|rpl2001|I|60S;SPAC26A3.04|rpl2002|I|60S	7;7	7;7	7;7	>SPAC3A12.10|rpl2001|I|60S ribosomal protein L20a (predicted);>SPAC26A3.04|rpl2002|I|60S ribosomal protein L20 (predicted)	2	7	7	7	6	7	6	7	6	7	42	42	42	20.599	176	176;176	0	49.927	By MS/MS	By MS/MS	37.5	42	78497000	35908000	42588000	37053000	39233000	6	7	13				253	464;1264;4520;5433;5844;5853;5876	True;True;True;True;True;True;True	484;1323;4739;5687;6124;6133;6156	1039;1040;2679;2680;10142;12029;12030;12954;12955;12969;12970;13013;13014	1003;1004;2543;2544;9787;11586;11587;12472;12473;12487;12488;12529;12530	1003;2544;9787;11587;12473;12488;12529
SPAC26A3.05|chc1|I|clathrin	SPAC26A3.05|chc1|I|clathrin	24	24	24	>SPAC26A3.05|chc1|I|clathrin heavy chain Chc1 (predicted)	1	24	24	24	19	21	19	21	19	21	20.2	20.2	20.2	190.02	1666	1666	0	221.51	By MS/MS	By MS/MS	16.7	17	264980000	107040000	157940000	123450000	133330000	18	21	39				254	57;328;408;783;792;803;1549;2276;2489;2646;2828;3069;3332;3382;3422;3644;4533;4657;4698;5631;5964;6043;6402;6605	True;True;True;True;True;True;True;True;True;True;True;True;True;True;True;True;True;True;True;True;True;True;True;True	58;344;427;821;830;841;1619;2368;2588;2752;2941;3198;3470;3521;3561;3790;4753;4882;4923;5900;6247;6327;6697;6909	114;115;769;770;918;919;1692;1693;1708;1726;3265;5057;5058;5462;5762;5763;6103;6632;6633;7139;7232;7304;7305;7734;7735;10188;10189;10517;10518;10596;10597;12515;12516;13200;13342;13343;14047;14048;14495;14496	107;108;109;751;752;886;887;1622;1623;1637;1656;3109;4841;4842;5227;5508;5509;5835;6358;6359;6852;6941;7006;7007;7394;7395;9834;9835;10156;10226;10227;10228;12058;12059;12707;12845;12846;13529;13980;13981	108;752;887;1622;1637;1656;3109;4842;5227;5508;5835;6359;6852;6941;7006;7395;9835;10156;10228;12059;12707;12845;13529;13980	98;99	649;992
SPBC17G9.10|rpl1102|II|60S;SPAC26A3.07c|rpl1101|I|60S	SPBC17G9.10|rpl1102|II|60S;SPAC26A3.07c|rpl1101|I|60S	3;3	3;3	3;3	>SPBC17G9.10|rpl1102|II|60S ribosomal protein L11 (predicted);>SPAC26A3.07c|rpl1101|I|60S ribosomal protein L11 (predicted)	2	3	3	3	3	3	3	3	3	3	20.1	20.1	20.1	19.891	174	174;174	0	40.319	By MS/MS	By MS/MS	20.1	20.1	79214000	41065000	38149000	40927000	36306000	2	3	5				255	2621;4491;5991	True;True;True	2726;4708;6274	5719;5720;10083;10084;13249;13250	5466;5467;9737;12753;12754	5466;9737;12754
SPAC26A3.10|cnt6|I|centaurin	SPAC26A3.10|cnt6|I|centaurin	8	8	8	>SPAC26A3.10|cnt6|I|centaurin ADOP ribosylation factor GTPase activating protein family (predicted)	1	8	8	8	2	8	2	8	2	8	10.2	10.2	10.2	104.5	923	923	0	59.175	By matching	By MS/MS	2.1	10.2	22854000	3044800	19809000	0	18781000	0	7	7				256	418;1930;2884;3121;4683;4875;5861;6368	True;True;True;True;True;True;True;True	437;2015;3001;3252;4908;5110;6141;6663	933;4308;4309;6221;6734;10565;10566;10953;12984;13978	901;4158;5949;6459;10198;10572;12501;13461	901;4158;5949;6459;10198;10572;12501;13461
SPAC26A3.15c|nsp1|I|nucleoporin	SPAC26A3.15c|nsp1|I|nucleoporin	7	7	7	>SPAC26A3.15c|nsp1|I|nucleoporin Nsp1	1	7	7	7	7	7	7	7	7	7	15.4	15.4	15.4	60.73	598	598	0	77.16	By MS/MS	By MS/MS	15.4	15.4	131990000	68211000	63782000	69020000	59661000	8	7	15				257	134;479;2327;3860;5427;5543;6018	True;True;True;True;True;True;True	142;500;2421;4009;5681;5806;6301	385;386;1071;1072;5152;5153;8164;8165;12019;12020;12321;12322;13295;13296	376;377;1034;1035;4927;4928;7803;7804;7805;11576;11577;11872;11873;12796;12797	376;1034;4928;7803;11577;11873;12797
SPAC26F1.03|pda1|I|pyruvate	SPAC26F1.03|pda1|I|pyruvate	10	10	10	>SPAC26F1.03|pda1|I|pyruvate dehydrogenase e1 component alpha subunit Pda1 (predicted)	1	10	10	10	4	9	4	9	4	9	27.9	27.9	27.9	45.137	409	409	0	61.864	By MS/MS	By MS/MS	10.8	24.4	28361000	10769000	17593000	14015000	13433000	4	9	13				258	790;1688;1738;2130;2361;3104;3149;4044;4948;5146	True;True;True;True;True;True;True;True;True;True	828;1761;1812;2219;2455;3235;3280;4236;5186;5389	1704;1705;3658;3751;4723;5218;5219;6700;6701;6781;9134;11102;11473	1633;1634;3521;3611;4545;4988;4989;6427;6428;6500;8851;10710;11062	1633;3521;3611;4545;4988;6427;6500;8851;10710;11062
SPAC26F1.04c|etr1|I|enoyl-[acyl-carrier	SPAC26F1.04c|etr1|I|enoyl-[acyl-carrier	2	2	2	>SPAC26F1.04c|etr1|I|enoyl-[acyl-carrier protein] reductase (predicted)	1	2	2	2	2	1	2	1	2	1	5.1	5.1	5.1	41.229	372	372	0	11.782	By MS/MS	By matching	5.1	2.2	6969000	4069400	2899600	0	2749100	3	0	3				259	1387;6328	True;True	1452;6622	2957;2958;13892	2813;2814;13380	2813;13380
SPAC26F1.06|gpm1|I|monomeric	SPAC26F1.06|gpm1|I|monomeric	19	19	19	>SPAC26F1.06|gpm1|I|monomeric 2,3-bisphosphoglycerate (BPG)-dependent phosphoglycerate mutase (PGAM), Gpm1	1	19	19	19	19	19	19	19	19	19	76.8	76.8	76.8	23.765	211	211	0	159.81	By MS/MS	By MS/MS	76.8	76.8	1092600000	552770000	539790000	498080000	486520000	23	23	46				260	313;314;1060;1061;1303;2021;2995;3510;3511;3959;4713;5206;5280;5341;5648;6005;6309;6671;6672	True;True;True;True;True;True;True;True;True;True;True;True;True;True;True;True;True;True;True	327;328;329;330;1113;1114;1363;2107;3117;3652;3653;4142;4938;5450;5525;5589;5918;5919;6288;6603;6975;6976	730;731;732;733;734;735;736;737;738;739;740;741;742;2265;2266;2267;2268;2759;2760;4488;4489;4490;4491;6470;6471;7475;7476;7477;7478;8675;8676;10627;10628;11582;11583;11729;11730;11846;11847;12543;12544;12545;12546;13271;13272;13852;13853;14635;14636;14637;14638	714;715;716;717;718;719;720;721;722;723;724;725;2165;2166;2167;2168;2613;2614;4324;4325;6204;6205;7162;7163;7164;7165;8334;8335;10253;10254;11161;11162;11297;11298;11406;11407;12083;12084;12085;12774;12775;13341;13342;14118;14119;14120;14121	719;724;2165;2167;2613;4325;6205;7163;7164;8334;10254;11161;11297;11406;12084;12774;13342;14118;14120	100	172
SPAC26F1.07|SPAC26F1.07|I|glucose	SPAC26F1.07|SPAC26F1.07|I|glucose	9	9	9	>SPAC26F1.07|SPAC26F1.07|I|glucose 1-dehydrogenase (NADP+) (predicted)	1	9	9	9	8	8	8	8	8	8	42.4	42.4	42.4	36.192	321	321	0	98.682	By MS/MS	By MS/MS	37.1	36.1	159520000	85380000	74139000	93038000	62632000	8	7	15				261	737;1490;2110;2118;2652;2853;3241;5323;6435	True;True;True;True;True;True;True;True;True	772;1558;2199;2207;2758;2966;3377;5570;6730	1600;1601;3151;4686;4687;4703;4704;5774;5775;6155;6156;6975;6976;11812;11813;14162	1534;1535;3004;4510;4511;4526;4527;5518;5519;5888;5889;6690;6691;11373;11374;13668	1534;3004;4510;4526;5518;5888;6690;11374;13668
SPAC26F1.10c|pyp1|I|tyrosine	SPAC26F1.10c|pyp1|I|tyrosine	2	2	2	>SPAC26F1.10c|pyp1|I|tyrosine phosphatase Pyp1	1	2	2	2	1	1	1	1	1	1	4.9	4.9	4.9	61.587	550	550	0	11.344	By MS/MS	By MS/MS	2.7	2.2	2133800	0	2133800	0	2023000	1	0	1				262	5431;5629	True;True	5685;5897	12026;12508	11583;12050	11583;12050
SPAC26F1.13c|lrs1|I|cytoplasmic	SPAC26F1.13c|lrs1|I|cytoplasmic	11	11	11	>SPAC26F1.13c|lrs1|I|cytoplasmic leucine-tRNA ligase Lrs1 (predicted)	1	11	11	11	7	11	7	11	7	11	11.5	11.5	11.5	126.45	1111	1111	0	79.032	By MS/MS	By MS/MS	7.1	11.5	68904000	25910000	42993000	31683000	34989000	6	10	16				263	129;130;890;964;1080;1087;1504;2004;3527;6345;6416	True;True;True;True;True;True;True;True;True;True;True	137;138;936;1012;1135;1142;1572;2090;3671;6640;6711	377;378;379;1899;1900;2053;2054;2307;2308;2309;2319;3180;4457;4458;7513;7514;13926;13927;14127	369;370;371;1815;1816;1965;1966;2207;2208;2217;3032;4298;4299;7203;13413;13414;13636	369;371;1815;1966;2208;2217;3032;4299;7203;13414;13636
SPAC26H5.04|gid5|I|GID	SPAC26H5.04|gid5|I|GID	6	6	6	>SPAC26H5.04|gid5|I|GID complex armadillo repeat subunit Gid5 (predicted)	1	6	6	6	1	6	1	6	1	6	10.8	10.8	10.8	90.407	789	789	0	42.093	By matching	By MS/MS	1.3	10.8	16787000	1897500	14890000	0	14117000	0	6	6				264	1040;1474;2411;3460;4139;5333	True;True;True;True;True;True	1093;1541;2506;3600;4332;5581	2217;3121;5315;5316;7381;9311;11832	2120;2977;5077;7076;9019;11392	2120;2977;5077;7076;9019;11392
SPAC26H5.07c|SPAC26H5.07c|I|seven	SPAC26H5.07c|SPAC26H5.07c|I|seven	3	3	3	>SPAC26H5.07c|SPAC26H5.07c|I|seven transmembrane receptor protein (predicted)	1	3	3	3	3	3	3	3	3	3	5.9	5.9	5.9	56.858	505	505	0	28.277	By MS/MS	By MS/MS	5.9	5.9	34748000	16221000	18527000	15093000	18694000	1	2	3				265	2357;3408;6598	True;True;True	2451;3547;6901	5210;5211;7277;7278;14480;14481	4981;4982;6982;6983;13966	4982;6982;13966
SPAC26H5.09c|SPAC26H5.09c|I|oxidoreductase	SPAC26H5.09c|SPAC26H5.09c|I|oxidoreductase	12	12	12	>SPAC26H5.09c|SPAC26H5.09c|I|oxidoreductase involved in NADPH regeneration (predicted)	1	12	12	12	12	11	12	11	12	11	45.8	45.8	45.8	41.432	369	369	0	86.488	By MS/MS	By MS/MS	45.8	42.5	159120000	84033000	75085000	75797000	71605000	18	8	26				266	332;849;1075;2238;2482;2795;3235;4152;4467;4661;5332;5386	True;True;True;True;True;True;True;True;True;True;True;True	348;892;1130;2329;2580;2908;3371;4345;4346;4683;4886;5579;5580;5637	776;777;1816;1817;2300;2301;4987;4988;5447;5448;6043;6044;6960;6961;9333;9334;9335;9336;10029;10524;10525;11829;11830;11831;11931;11932;11933;11934	757;758;759;1739;2199;2200;4781;4782;5213;5214;5783;6673;6674;6675;9040;9041;9042;9043;9685;10161;10162;11387;11388;11389;11390;11391;11487;11488;11489	759;1739;2199;4782;5213;5783;6674;9043;9685;10161;11391;11487	101;102	13;121
SPAC26H5.10c|tif51|I|translation;SPBC336.10c|tif512|II|translation	SPAC26H5.10c|tif51|I|translation;SPBC336.10c|tif512|II|translation	6;5	6;5	6;5	>SPAC26H5.10c|tif51|I|translation elongation factor eIF5A (predicted);>SPBC336.10c|tif512|II|translation elongation factor eIF5A (predicted)	2	6	6	6	5	5	5	5	5	5	45.9	45.9	45.9	17.152	157	157;169	0	72.545	By MS/MS	By MS/MS	30.6	45.9	142890000	73267000	69620000	65388000	61510000	8	7	15				267	3001;3541;4655;5920;5921;6418	True;True;True;True;True;True	3123;3124;3125;3685;4880;6201;6202;6713	6481;6482;6483;6484;6485;6486;6487;7539;7540;10515;13095;13096;13097;13098;13099;13100;14132	6214;6215;6216;6217;6218;6219;7227;10154;12606;12607;12608;12609;12610;12611;13639	6219;7227;10154;12609;12610;13639	103;104	74;81
SPAC27D7.14c|tpr1|I|RNA	SPAC27D7.14c|tpr1|I|RNA	10	10	10	>SPAC27D7.14c|tpr1|I|RNA polymerase II associated Paf1 complex subunit Tpr1	1	10	10	10	9	8	9	8	9	8	11.1	11.1	11.1	119.15	1039	1039	0	62.111	By MS/MS	By MS/MS	9.3	8.4	37306000	25866000	11440000	19188000	17524000	7	6	13				268	131;1281;2131;2197;2251;3804;3984;4889;5001;6386	True;True;True;True;True;True;True;True;True;True	139;1341;2220;2288;2343;3952;4173;5124;5240;6681	380;381;2718;2719;4724;4725;4898;4899;5015;8055;8738;8739;10981;11199;11200;14011;14012	372;373;2577;4546;4707;4806;7701;8391;8392;10601;10804;10805;13495;13496	373;2577;4546;4707;4806;7701;8391;10601;10805;13495
SPAC27E2.03c|SPAC27E2.03c|I|Obg-Like	SPAC27E2.03c|SPAC27E2.03c|I|Obg-Like	3	3	3	>SPAC27E2.03c|SPAC27E2.03c|I|Obg-Like ATPase (predicted)	1	3	3	3	3	2	3	2	3	2	10.7	10.7	10.7	44.332	392	392	0	40.64	By MS/MS	By MS/MS	10.7	8.2	38435000	24091000	14344000	23869000	13821000	2	2	4				269	494;1665;6089	True;True;True	515;1737;6379	1098;3603;3604;13439;13440	1061;3465;12937;12938	1061;3465;12938
SPAC27E2.09|mak2|I|histidine	SPAC27E2.09|mak2|I|histidine	4	4	4	>SPAC27E2.09|mak2|I|histidine kinase Mak2	1	4	4	4	3	3	3	3	3	3	1.6	1.6	1.6	264.62	2310	2310	0	23.652	By MS/MS	By MS/MS	1.1	1.2	9780300	2782000	6998300	0	6635000	3	1	4				270	967;1576;3154;3447	True;True;True;True	1015;1646;3285;3587	2059;2060;3431;3432;6790;7353	1971;1972;3299;6507;7052	1972;3299;6507;7052
SPAC27E2.10c|rfc3|I|DNA	SPAC27E2.10c|rfc3|I|DNA	1	1	1	>SPAC27E2.10c|rfc3|I|DNA replication factor C complex subunit Rfc3	1	1	1	1	1	1	1	1	1	1	3.8	3.8	3.8	38.439	342	342	0.0022198	7.6587	By MS/MS	By MS/MS	3.8	3.8	2460100	897720	1562400	0	1481300	1	1	2				271	2409	TRUE	2504	5311;5312	5073;5074	5073
SPAC29A4.02c|SPAC29A4.02c|I|translation	SPAC29A4.02c|SPAC29A4.02c|I|translation	15	15	15	>SPAC29A4.02c|SPAC29A4.02c|I|translation elongation factor EF-1 gamma subunit	1	15	15	15	15	15	15	15	15	15	50.6	50.6	50.6	45.701	409	409	0	204.77	By MS/MS	By MS/MS	50.6	50.6	664300000	305000000	359300000	302260000	343380000	17	21	38				272	135;652;1355;1400;1745;2195;3100;3116;3714;4876;5717;5825;5852;6028;6686	True;True;True;True;True;True;True;True;True;True;True;True;True;True;True	143;684;1417;1465;1819;2286;3231;3247;3860;5111;5992;6104;6132;6312;6991	387;388;389;1430;1431;2869;2870;2984;2985;3762;3763;4894;4895;6692;6693;6724;6725;7868;7869;10954;10955;12687;12688;12915;12916;12967;12968;13316;13317;14666;14667;14668;14669	378;379;380;1379;1380;2727;2728;2729;2842;2843;3621;3622;3623;4703;4704;6418;6419;6448;6449;6450;7524;7525;10573;10574;12227;12434;12435;12485;12486;12818;12819;12820;12821;12822;14142;14143;14144;14145	380;1380;2729;2842;3623;4704;6418;6450;7525;10574;12227;12435;12485;12821;14142
SPAC29A4.04c|cbf5|I|pseudouridylate	SPAC29A4.04c|cbf5|I|pseudouridylate	2	2	2	>SPAC29A4.04c|cbf5|I|pseudouridylate synthase Cbf5 (predicted)	1	2	2	2	2	1	2	1	2	1	7.4	7.4	7.4	53.11	474	474	0	20.002	By MS/MS	By MS/MS	7.4	2.3	31519000	30593000	925510	30593000	0	1	1	2				273	2358;4277	True;True	2452;4483	5212;5213;9608	4983;9297	4983;9297
SPAC29A4.11|rga3|I|Rho-type	SPAC29A4.11|rga3|I|Rho-type	4	4	4	>SPAC29A4.11|rga3|I|Rho-type GTPase activating protein Rga3	1	4	4	4	4	4	4	4	4	4	5.6	5.6	5.6	108.65	969	969	0	23.189	By MS/MS	By MS/MS	5.6	5.6	35355000	18308000	17047000	16645000	17825000	1	3	4				274	1195;1350;4309;6041	True;True;True;True	1253;1412;4518;6325	2536;2537;2859;2860;9703;9704;13339;13340	2416;2717;9391;12842;12843	2416;2717;9391;12843
SPAC29A4.15|srs1|I|cytoplasmic	SPAC29A4.15|srs1|I|cytoplasmic	18	18	18	>SPAC29A4.15|srs1|I|cytoplasmic serine-tRNA ligase Srs1 (predicted)	1	18	18	18	15	18	15	18	15	18	52.4	52.4	52.4	51.642	450	450	0	144.79	By MS/MS	By MS/MS	42.7	52.4	263870000	116350000	147510000	119310000	124430000	13	19	32				275	278;621;1128;1733;2019;2389;2765;3009;3907;4003;4638;4993;5275;5326;5392;6295;6372;6531	True;True;True;True;True;True;True;True;True;True;True;True;True;True;True;True;True;True	291;652;1183;1807;2105;2484;2877;3135;4072;4193;4861;5232;5520;5573;5643;6589;6667;6829	661;662;1363;1364;2403;2404;3742;3743;4484;4485;5273;5274;5988;5989;5990;6503;6504;8414;8415;9027;9028;10474;11185;11719;11816;11817;11943;11944;13826;13827;13985;13986;14332;14333	645;646;647;1316;1317;2297;2298;3603;3604;4320;4321;5041;5723;5724;5725;6233;8056;8057;8750;8751;10113;10114;10791;11288;11377;11500;11501;13314;13315;13468;13469;13827;13828	645;1316;2298;3603;4321;5041;5724;6233;8057;8750;10113;10791;11288;11377;11500;13314;13469;13827	105;106	1;204
SPAC29A4.16|hal4|I|serine/threonine	SPAC29A4.16|hal4|I|serine/threonine	4	4	4	>SPAC29A4.16|hal4|I|serine/threonine protein kinase Hal4	1	4	4	4	3	4	3	4	3	4	7.9	7.9	7.9	69.114	636	636	0	27.477	By MS/MS	By MS/MS	6.3	7.9	181900000	102500000	79397000	101910000	75868000	3	3	6				276	740;1293;1589;1646	True;True;True;True	775;1353;1659;1716	1605;1606;2741;3455;3456;3563;3564	1540;1541;2596;3324;3325;3424;3425	1541;2596;3324;3424
SPAC29A4.18|prw1|I|Clr6	SPAC29A4.18|prw1|I|Clr6	4	4	4	>SPAC29A4.18|prw1|I|Clr6 histone deacetylase complex subunit Prw1	1	4	4	4	4	4	4	4	4	4	9.5	9.5	9.5	48.476	431	431	0	26.721	By MS/MS	By MS/MS	9.5	9.5	42391000	12526000	29865000	22121000	18720000	3	4	7				277	3287;4246;5449;5547	True;True;True;True	3424;4450;5703;5810	7058;7059;9538;9539;9540;12064;12065;12329;12330	6775;6776;9233;9234;11621;11622;11880;11881	6775;9234;11621;11881
SPAC29A4.20|elp3|I|elongator	SPAC29A4.20|elp3|I|elongator	6	6	6	>SPAC29A4.20|elp3|I|elongator complex subunit Elp3 (predicted)	1	6	6	6	6	6	6	6	6	6	14.2	14.2	14.2	61.849	544	544	0	42.714	By MS/MS	By MS/MS	14.2	14.2	58231000	25948000	32283000	26638000	29917000	5	7	12				278	1518;1943;2525;3146;3694;4333	True;True;True;True;True;True	1586;2029;2625;3277;3840;4543	3204;3205;4337;4338;5537;5538;6773;6774;7827;7828;9754;9755	3053;3054;4186;4187;5296;5297;5298;6494;6495;7484;9445;9446	3054;4186;5298;6494;7484;9446
SPAC29B12.04|snz1|I|pyridoxine	SPAC29B12.04|snz1|I|pyridoxine	5	5	5	>SPAC29B12.04|snz1|I|pyridoxine biosynthesis protein	1	5	5	5	5	3	5	3	5	3	20.6	20.6	20.6	31.403	296	296	0	37.283	By MS/MS	By MS/MS	20.6	12.5	13384000	8311200	5073100	0	4809800	4	2	6				279	173;1016;1037;1742;2521	True;True;True;True;True	183;1066;1089;1816;2621	461;2170;2171;2210;2211;3756;3757;5530	451;2078;2079;2115;3616;3617;5289	451;2079;2115;3617;5289	107	277
SPAC29B12.06c|rcd1|I|RNA-binding	SPAC29B12.06c|rcd1|I|RNA-binding	2	2	2	>SPAC29B12.06c|rcd1|I|RNA-binding protein, CCR4-NOT complex subunit Rcd1	1	2	2	2	1	2	1	2	1	2	7.4	7.4	7.4	32.211	283	283	0	12.717	By matching	By MS/MS	4.2	7.4	5460000	1085600	4374400	0	4147300	0	2	2				280	3732;5668	True;True	3879;5940	7901;7902;12590	7556;12131	7556;12131
SPAC29E6.08|tbp1|I|TATA-binding	SPAC29E6.08|tbp1|I|TATA-binding	3	3	3	>SPAC29E6.08|tbp1|I|TATA-binding protein (TBP)	1	3	3	3	2	2	2	2	2	2	18.2	18.2	18.2	25.442	231	231	0	19.686	By MS/MS	By MS/MS	7.4	15.2	6554900	770290	5784600	0	5484300	1	2	3				281	1267;3144;6237	True;True;True	1326;3275;6530	2683;6771;13720;13721	2547;6492;13214	2547;6492;13214
SPAC2C4.10c|csc4|I|SIP/FAR	SPAC2C4.10c|csc4|I|SIP/FAR	8	8	8	>SPAC2C4.10c|csc4|I|SIP/FAR complex subunit, Csc4	1	8	8	8	8	8	8	8	8	8	52.4	52.4	52.4	19.686	166	166	0	54.817	By MS/MS	By MS/MS	52.4	52.4	75000000	34720000	40280000	35010000	37899000	5	3	8				282	750;1063;2223;2626;3357;3969;5374;5973	True;True;True;True;True;True;True;True	785;1116;2314;2731;3495;4158;5625;6256	1625;1626;2271;2272;4955;4956;5729;5730;7183;7184;8709;8710;11910;11911;13218;13219	1560;2171;2172;4755;5475;5476;6891;8364;11466;11467;12723	1560;2171;4755;5476;6891;8364;11466;12723
SPAC521.05|rps802|I|40S;SPAC2C4.16c|rps801|I|40S	SPAC521.05|rps802|I|40S;SPAC2C4.16c|rps801|I|40S	4;4	4;4	4;4	>SPAC521.05|rps802|I|40S ribosomal protein S8 (predicted);>SPAC2C4.16c|rps801|I|40S ribosomal protein S8 (predicted)	2	4	4	4	3	4	3	4	3	4	20.5	20.5	20.5	22.564	200	200;200	0	27.455	By MS/MS	By MS/MS	20.5	20.5	53961000	20944000	33017000	21301000	25060000	3	4	7				283	2503;3828;3829;4749	True;True;True;True	2602;3977;3978;4975	5487;5488;5489;8108;8109;8110;10695;10696	5251;5252;7751;7752;7753;10319;10320	5251;7751;7752;10319
SPAC2E1P3.01|SPAC2E1P3.01|I|dehydrogenase	SPAC2E1P3.01|SPAC2E1P3.01|I|dehydrogenase	3	3	3	>SPAC2E1P3.01|SPAC2E1P3.01|I|dehydrogenase (predicted)	1	3	3	3	3	1	3	1	3	1	9.5	9.5	9.5	37.929	348	348	0	19.62	By MS/MS	By MS/MS	9.5	3.4	8476000	8476000	0	8476000	0	3	1	4				284	2492;3327;5739	True;True;True	2591;3465;6014	5467;5468;7130;12730	5231;5232;6843;12266	5232;6843;12266
SPAC2E1P3.04|cao1|I|copper	SPAC2E1P3.04|cao1|I|copper	31	31	31	>SPAC2E1P3.04|cao1|I|copper amine oxidase Cao1	1	31	31	31	29	29	29	29	29	29	55.9	55.9	55.9	81.24	712	712	0	323.31	By MS/MS	By MS/MS	54.4	50.6	1167400000	526050000	641310000	516600000	591970000	31	34	65				285	666;681;895;981;1149;1234;1970;1989;2032;2067;2068;2103;2284;3084;3480;3522;3615;3704;3900;3935;3940;3949;3986;4203;4342;4371;5055;5082;5701;6198;6491	True;True;True;True;True;True;True;True;True;True;True;True;True;True;True;True;True;True;True;True;True;True;True;True;True;True;True;True;True;True;True	698;714;941;1029;1206;1293;2056;2075;2119;2154;2155;2192;2376;3214;3620;3665;3666;3759;3850;4063;4113;4119;4129;4175;4402;4552;4582;5295;5322;5976;6490;6789	1464;1465;1491;1492;1910;1911;2084;2085;2447;2448;2622;2623;2624;2625;4391;4392;4393;4394;4427;4428;4521;4522;4589;4590;4591;4592;4593;4668;4669;5072;5073;6662;6663;7416;7417;7497;7498;7678;7679;7845;7846;8392;8393;8615;8628;8629;8646;8647;8648;8995;8996;8997;8998;9436;9437;9438;9439;9440;9771;9772;9826;9827;11299;11349;12656;12657;13637;13638;13639;13640;13641;13642;13643;13644;13645;13646;13647…	1412;1413;1437;1438;1826;1827;1996;1997;2342;2343;2488;2489;2490;4234;4235;4236;4268;4269;4352;4353;4354;4416;4417;4418;4419;4420;4493;4854;4855;6388;6389;7108;7184;7185;7346;7347;7500;7501;7502;8036;8037;8273;8285;8286;8305;8306;8307;8308;8718;8719;8720;8721;9139;9140;9141;9142;9461;9462;9509;10894;10942;12195;12196;13129;13130;13131;13132;13133;13134;13135;13136;13137;13138;13139;13766;13767	1412;1437;1827;1996;2343;2490;4236;4268;4354;4419;4420;4493;4854;6389;7108;7185;7347;7501;8037;8273;8285;8305;8720;9142;9461;9509;10894;10942;12196;13134;13767	108;109;110	238;268;469
SPAC2F3.06c|kap104|I|karyopherin	SPAC2F3.06c|kap104|I|karyopherin	1	1	1	>SPAC2F3.06c|kap104|I|karyopherin Kap104	1	1	1	1	0	1	0	1	0	1	2.6	2.6	2.6	101.72	910	910	0.0049554	6.3258	By matching	By MS/MS	0	2.6	1546300	0	1546300	0	1466100	0	1	1				286	4297	TRUE	4503	9651	9335	9335
SPAC2F3.09|hem1|I|5-aminolevulinate	SPAC2F3.09|hem1|I|5-aminolevulinate	9	9	9	>SPAC2F3.09|hem1|I|5-aminolevulinate synthase Hem1	1	9	9	9	9	7	9	7	9	7	18.8	18.8	18.8	60.959	558	558	0	65.731	By MS/MS	By MS/MS	18.8	12.2	114910000	56917000	57997000	47710000	64193000	7	5	12				287	906;1315;1316;1508;1650;2182;3074;5813;6446	True;True;True;True;True;True;True;True;True	952;1375;1376;1576;1720;2272;3203;6091;6741	1942;2779;2780;2781;2782;3186;3187;3570;3571;4832;4833;6640;6641;12888;12889;14179	1856;2629;2630;2631;3038;3039;3430;3431;4645;4646;6366;6367;12411;13685	1856;2629;2630;3039;3430;4646;6366;12411;13685
SPAC2F7.03c|pom1|I|DYRK	SPAC2F7.03c|pom1|I|DYRK	2	2	2	>SPAC2F7.03c|pom1|I|DYRK family protein kinase Pom1	1	2	2	2	2	2	2	2	2	2	1.5	1.5	1.5	121.14	1087	1087	0	12.247	By MS/MS	By MS/MS	1.5	1.5	5347200	2782500	2564700	0	2431500	1	1	2				288	4175;6432	True;True	4371;6727	9376;9377;14155;14156	9082;9083;13662;13663	9082;13663
SPAC2F7.11|nrd1|I|RNA-binding	SPAC2F7.11|nrd1|I|RNA-binding	8	8	8	>SPAC2F7.11|nrd1|I|RNA-binding protein Nrd1	1	8	8	8	7	7	7	7	7	7	21.4	21.4	21.4	57.76	529	529	0	58.161	By MS/MS	By MS/MS	18	17.4	42032000	17222000	24810000	18395000	22349000	5	6	11				289	521;1344;1731;2109;3350;4104;5426;5698	True;True;True;True;True;True;True;True	544;1406;1805;2198;3488;4297;5680;5973	1156;1157;2849;2850;3738;3739;4684;4685;7170;9242;9243;12017;12018;12651	1113;1114;2709;2710;3599;3600;4508;4509;6880;8953;8954;11575;12190	1113;2710;3600;4508;6880;8954;11575;12190
SPAC2F7.13c|wrs1|I|cytoplasmic	SPAC2F7.13c|wrs1|I|cytoplasmic	6	6	6	>SPAC2F7.13c|wrs1|I|cytoplasmic tryptophan-tRNA ligase Wrs1 (predicted)	1	6	6	6	6	4	6	4	6	4	14.9	14.9	14.9	44.91	395	395	0	41.349	By MS/MS	By MS/MS	14.9	11.1	58342000	27251000	31091000	23918000	32810000	6	4	10				290	689;1645;2036;3345;3448;4545	True;True;True;True;True;True	722;1715;2123;3483;3588;4765	1505;1506;3561;3562;4529;4530;7162;7354;7355;10213	1449;1450;3422;3423;4361;4362;6872;7053;7054;9855	1449;3423;4361;6872;7053;9855
SPAC2G11.10c|uba42|I|thiosulfate	SPAC2G11.10c|uba42|I|thiosulfate	2	2	2	>SPAC2G11.10c|uba42|I|thiosulfate sulfurtransferase, URM1 activating enzyme E1-type Uba42 (predicted)	1	2	2	2	2	2	2	2	2	2	8.5	8.5	8.5	44.415	401	401	0	17.107	By MS/MS	By MS/MS	8.5	8.5	9119000	4920300	4198700	4973200	3927800	1	2	3				291	2931;4137	True;True	3049;4330	6318;6319;9307;9308	6043;9015;9016	6043;9016
SPAC30.01c|sec72|I|Sec7	SPAC30.01c|sec72|I|Sec7	5	5	5	>SPAC30.01c|sec72|I|Sec7 domain protein, ARF GEF Sec72	1	5	5	5	4	4	4	4	4	4	2.6	2.6	2.6	206.8	1822	1822	0	43.769	By MS/MS	By MS/MS	2	2.1	38745000	14121000	24624000	14990000	22477000	3	3	6				292	211;2720;2752;5203;5511	True;True;True;True;True	222;2832;2864;5447;5772	531;5916;5917;5968;11576;11577;12222;12223	518;5658;5659;5705;11155;11156;11771	518;5658;5705;11156;11771	111	1686
SPAC30.04c|abc4|I|glutathione	SPAC30.04c|abc4|I|glutathione	2	2	2	>SPAC30.04c|abc4|I|glutathione S-conjugate-exporting ATPase Abc4	1	2	2	2	2	1	2	1	2	1	2.4	2.4	2.4	164.79	1469	1469	0	16.556	By MS/MS	By matching	2.4	1.4	4796800	3800900	995850	3800900	0	2	0	2				293	5167;5348	True;True	5410;5596	11513;11860;11861	11099;11419	11099;11419
SPAC30C2.04|asc1|I|cofactor	SPAC30C2.04|asc1|I|cofactor	4	4	4	>SPAC30C2.04|asc1|I|cofactor for cytoplasmic methionyl-and glutamyl-tRNA synthetases Asc1 (predicted)	1	4	4	4	4	4	4	4	4	4	8.4	8.4	8.4	50.606	450	450	0	26.772	By MS/MS	By MS/MS	8.4	8.4	32741000	14155000	18586000	14095000	17681000	3	3	6				294	410;989;3066;6542	True;True;True;True	429;1039;3195;6842	922;923;2106;2107;6627;6628;14359;14360	890;891;2017;2018;6354;6355;13854;13855	891;2017;6355;13855
SPAC30C2.08|SPAC30C2.08|I|conserved	SPAC30C2.08|SPAC30C2.08|I|conserved	5	5	5	>SPAC30C2.08|SPAC30C2.08|I|conserved fungal protein	1	5	5	5	5	5	5	5	5	5	11.4	11.4	11.4	52.69	457	457	0	35.053	By MS/MS	By MS/MS	11.4	11.4	57127000	31531000	25596000	31233000	24565000	4	3	7				295	436;587;2334;2569;2726	True;True;True;True;True	455;612;2428;2670;2838	970;971;1273;1274;5166;5167;5617;5618;5924;5925	938;939;1222;4941;5372;5373;5666;5667	938;1222;4941;5372;5666
SPAC30D11.09|cwf19|I|complexed	SPAC30D11.09|cwf19|I|complexed	1	1	1	>SPAC30D11.09|cwf19|I|complexed with Cdc5 protein Cwf19	1	1	1	1	0	1	0	1	0	1	1.6	1.6	1.6	74.419	639	639	0.0022099	7.6453	By matching	By MS/MS	0	1.6	4729700	0	4729700	0	4484100	0	1	1				296	2587	TRUE	2690	5654	5406	5406
SPAC30D11.14c|SPAC30D11.14c|I|RNA-binding	SPAC30D11.14c|SPAC30D11.14c|I|RNA-binding	1	1	1	>SPAC30D11.14c|SPAC30D11.14c|I|RNA-binding protein (predicted)	1	1	1	1	0	1	0	1	0	1	2.8	2.8	2.8	59.035	534	534	0.0023697	9.5947	By matching	By MS/MS	0	2.8	0	0	0	0	0	0	1	1				297	767	TRUE	803	1659	1591	1591
SPAC31A2.09c|apm4|I|AP-2	SPAC31A2.09c|apm4|I|AP-2	1	1	1	>SPAC31A2.09c|apm4|I|AP-2 adaptor complex subunit Apm4 (predicted)	1	1	1	1	1	1	1	1	1	1	1.8	1.8	1.8	50.821	446	446	0.005	6.4213	By MS/MS	By MS/MS	1.8	1.8	5191100	2671000	2520100	0	2389300	1	1	2				298	3669	TRUE	3815	7780;7781	7441;7442	7441
SPAC31A2.14|bun107|I|WD	SPAC31A2.14|bun107|I|WD	2	2	2	>SPAC31A2.14|bun107|I|WD repeat protein, human WDR48 family Bun107	1	2	2	2	2	2	2	2	2	2	1.9	1.9	1.9	107.28	962	962	0	11.453	By MS/MS	By MS/MS	1.9	1.9	8378000	4273500	4104500	4314500	3850500	1	2	3				299	827;3419	True;True	868;3558	1772;1773;7298;7299	1699;7000;7001	1699;7001
SPAC31A2.16|gef2|I|RhoGEF	SPAC31A2.16|gef2|I|RhoGEF	1	1	1	>SPAC31A2.16|gef2|I|RhoGEF Gef2	1	1	1	1	1	1	1	1	1	1	1.4	1.4	1.4	126.54	1101	1101	0.0022422	7.7979	By MS/MS	By matching	1.4	1.4	5492300	2089900	3402500	0	3225800	1	0	1				300	2540	TRUE	2640	5561;5562	5320	5320
SPAC31G5.04|lys12|I|homoisocitrate	SPAC31G5.04|lys12|I|homoisocitrate	12	12	12	>SPAC31G5.04|lys12|I|homoisocitrate dehydrogenase Lys12	1	12	12	12	11	12	11	12	11	12	41.4	41.4	41.4	39.256	362	362	0	100.21	By MS/MS	By MS/MS	39	41.4	161230000	74673000	86560000	75714000	81025000	12	9	21				301	1145;1185;1760;2041;2794;2958;3353;3869;3896;4907;5096;5747	True;True;True;True;True;True;True;True;True;True;True;True	1202;1242;1834;2128;2907;3076;3491;4021;4058;5143;5336;6022	2441;2513;2514;3839;3840;4539;4540;6041;6042;6368;6369;6370;7175;7176;8186;8187;8382;8383;11016;11017;11371;11372;12747;12748	2336;2397;3696;3697;4368;4369;4370;5781;5782;6091;6092;6093;6884;6885;7827;7828;8028;10630;10631;10963;10964;12279;12280	2336;2397;3696;4368;5781;6092;6885;7828;8028;10631;10963;12279	112	100
SPAC31G5.13|rpn11|I|19S	SPAC31G5.13|rpn11|I|19S	6	6	6	>SPAC31G5.13|rpn11|I|19S proteasome regulatory subunit Rpn11	1	6	6	6	5	6	5	6	5	6	28.2	28.2	28.2	34.572	308	308	0	43.01	By MS/MS	By MS/MS	20.8	28.2	55820000	24855000	30966000	25143000	29070000	5	6	11				302	491;2099;4602;5045;6128;6230	True;True;True;True;True;True	512;2187;4824;5285;6418;6523	1092;1093;4653;4654;10324;11281;11282;13513;13514;13706;13707	1054;1055;4479;4480;9953;10879;10880;13010;13011;13202;13203	1055;4480;9953;10879;13010;13203
SPAC31G5.17c|rps1001|I|40S	SPAC31G5.17c|rps1001|I|40S	4	2	2	>SPAC31G5.17c|rps1001|I|40S ribosomal protein S10 (predicted)	1	4	2	2	4	4	2	2	2	2	40.3	20.8	20.8	16.275	144	144	0	13.897	By MS/MS	By MS/MS	40.3	40.3	40522000	23821000	16701000	0	15834000	1	2	3				303	235;1258;2194;2850	True;False;False;True	246;1317;2285;2963	574;575;2668;2669;4890;4891;4892;4893;6148;6149;6150	558;559;2533;2534;4699;4700;4701;4702;5882;5883	558;2533;4699;5883
SPAC323.04|SPAC323.04|I|mitochondrial	SPAC323.04|SPAC323.04|I|mitochondrial	4	4	4	>SPAC323.04|SPAC323.04|I|mitochondrial ATPase (predicted)	1	4	4	4	3	4	3	4	3	4	10.5	10.5	10.5	54.841	487	487	0	28.209	By MS/MS	By MS/MS	8.8	10.5	20282000	9192900	11089000	10247000	9459100	3	4	7				304	3798;3817;4308;6333	True;True;True;True	3946;3966;4517;6627	8039;8040;8086;8087;9702;13901;13902	7687;7688;7731;7732;9390;13389;13390	7687;7731;9390;13390
SPAC328.03|tps1|I|alpha,alpha-trehalose-phosphate	SPAC328.03|tps1|I|alpha,alpha-trehalose-phosphate	14	14	14	>SPAC328.03|tps1|I|alpha,alpha-trehalose-phosphate synthase [UDP-forming]	1	14	14	14	14	13	14	13	14	13	35.7	35.7	35.7	58.493	513	513	0	122.15	By MS/MS	By MS/MS	35.7	32	257960000	120460000	137500000	116870000	133950000	14	11	25				305	24;533;1374;1379;2078;2435;3346;3561;4015;4400;5056;5963;6238;6641	True;True;True;True;True;True;True;True;True;True;True;True;True;True	24;556;1437;1442;2165;2532;3484;3705;4205;4614;5296;6246;6531;6945	44;45;1174;1175;2906;2907;2914;2915;4611;4612;5362;5363;7163;7164;7577;9053;9054;9891;9892;11300;11301;13198;13199;13722;13723;14574;14575	42;43;1131;1132;2764;2765;2770;2771;4437;5125;5126;5127;6873;6874;7260;8773;8774;9567;9568;10895;12704;12705;12706;13215;13216;14062;14063	42;1132;2764;2770;4437;5126;6873;7260;8773;9568;10895;12706;13216;14063
SPAC328.04|SPAC328.04|I|AAA	SPAC328.04|SPAC328.04|I|AAA	1	1	1	>SPAC328.04|SPAC328.04|I|AAA family ATPase, unknown biological role	1	1	1	1	1	1	1	1	1	1	2	2	2	81.758	741	741	0.0021882	7.5463	By MS/MS	By MS/MS	2	2	1877800	900590	977250	0	926510	1	1	2				306	2204	TRUE	2295	4910;4911	4716;4717	4716
SPAC328.06|ubp2|I|ubiquitin	SPAC328.06|ubp2|I|ubiquitin	2	2	2	>SPAC328.06|ubp2|I|ubiquitin C-terminal hydrolase Ubp2	1	2	2	2	1	2	1	2	1	2	2.5	2.5	2.5	130.3	1141	1141	0	12.267	By MS/MS	By MS/MS	1.5	2.5	911230000	493890000	417330000	0	395670000	1	2	3				307	4017;6625	True;True	4207;6929	9056;14543;14544	8776;14031;14032	8776;14032
SPAC328.10c|rps502|I|40S	SPAC328.10c|rps502|I|40S	11	11	2	>SPAC328.10c|rps502|I|40S ribosomal protein S5 (predicted)	1	11	11	2	11	11	11	11	2	2	63.5	63.5	8.9	22.357	203	203	0	115.87	By MS/MS	By MS/MS	63.5	63.5	266830000	131410000	135420000	134970000	120250000	11	13	24				308	37;700;1246;1498;2033;3198;3722;4386;4721;4964;6080	True;True;True;True;True;True;True;True;True;True;True	37;735;1305;1566;2120;3333;3868;3869;4598;4946;5202;6370	69;70;1527;1528;1529;1530;2646;2647;2648;3166;3167;4523;4524;6895;6896;7883;7884;7885;7886;9860;9861;10641;10642;10643;11129;11130;13421;13422	66;67;1468;1469;1470;1471;2512;2513;2514;3018;3019;3020;4355;4356;6615;6616;7538;7539;7540;9539;9540;10267;10268;10269;10738;10739;12920;12921	66;1470;2513;3018;4355;6615;7538;9540;10268;10739;12921	113;114	76;77
SPAC343.04c|gid7|I|GID	SPAC343.04c|gid7|I|GID	2	2	2	>SPAC343.04c|gid7|I|GID complex subunit Gid7 (predicted)	1	2	2	2	2	1	2	1	2	1	5.1	5.1	5.1	58.403	507	507	0	11.052	By MS/MS	By MS/MS	5.1	2.4	3900400	2545700	1354700	2545700	0	1	1	2				309	875;5254	True;True	920;5499	1870;11675;11676	1787;11248	1787;11248
SPAC343.05|vma1|I|V-type	SPAC343.05|vma1|I|V-type	10	10	10	>SPAC343.05|vma1|I|V-type ATPase V1 domain, subunit A	1	10	10	10	9	9	9	9	9	9	21.3	21.3	21.3	68.805	619	619	0	70.635	By MS/MS	By MS/MS	19.4	21.3	71828000	34622000	37206000	32511000	34839000	6	9	15				310	32;1011;2210;2428;4360;4760;5659;5889;6501;6621	True;True;True;True;True;True;True;True;True;True	32;1061;2301;2525;4571;4987;5930;5931;6169;6799;6925	58;59;2158;2159;4927;4928;5347;5348;9806;10722;12566;12567;12568;12569;13035;13036;14278;14279;14523;14524	54;55;56;2068;4730;5109;5110;9493;10348;12107;12108;12109;12110;12548;12549;13777;14006	54;2068;4730;5110;9493;10348;12107;12549;13777;14006	115	326
SPAC343.16|lys2|I|homoaconitate	SPAC343.16|lys2|I|homoaconitate	1	1	1	>SPAC343.16|lys2|I|homoaconitate hydratase Lys2	1	1	1	1	0	1	0	1	0	1	1.2	1.2	1.2	78.024	721	721	0.00499	6.4091	By matching	By MS/MS	0	1.2	0	0	0	0	0	0	1	1				311	6078	TRUE	6368	13418	12917	12917
SPAC3A11.07|nde2|I|mitochondrial	SPAC3A11.07|nde2|I|mitochondrial	3	3	3	>SPAC3A11.07|nde2|I|mitochondrial NADH dehydrogenase (ubiquinone) Nde2 (predicted)	1	3	3	3	3	3	3	3	3	3	6.9	6.9	6.9	61.674	551	551	0	19.178	By MS/MS	By MS/MS	6.9	6.9	13656000	6459700	7196200	6563000	6719300	1	2	3				312	5452;5577;6611	True;True;True	5706;5841;6915	12070;12071;12386;12387;14505;14506	11626;11933;11934;13990;13991	11626;11934;13991
SPAC3A11.10c|dpe1|I|dipeptidyl	SPAC3A11.10c|dpe1|I|dipeptidyl	3	3	3	>SPAC3A11.10c|dpe1|I|dipeptidyl peptidase (predicted)	1	3	3	3	3	3	3	3	3	3	9.3	9.3	9.3	46.047	409	409	0	24.39	By MS/MS	By MS/MS	9.3	9.3	18622000	10738000	7885000	10906000	7307100	4	2	6				313	1848;5411;6327	True;True;True	1925;5664;6621	4150;4151;11988;11989;11990;13889;13890;13891	4000;11548;11549;11550;13378;13379	4000;11550;13378
SPAC3A11.12c|rpt5|I|19S	SPAC3A11.12c|rpt5|I|19S	3	3	3	>SPAC3A11.12c|rpt5|I|19S proteasome regulatory subunit Rpt5 (predicted)	1	3	3	3	3	3	3	3	3	3	7.5	7.5	7.5	48.835	438	438	0	21.801	By MS/MS	By MS/MS	7.5	7.5	25603000	12261000	13342000	12084000	12826000	1	1	2				314	817;3384;5822	True;True;True	856;3523;6101	1752;1753;7237;7238;12909;12910	1682;6945;12429;12430	1682;6945;12430
SPAC3A12.05c|taf2|I|TATA-binding	SPAC3A12.05c|taf2|I|TATA-binding	1	1	1	>SPAC3A12.05c|taf2|I|TATA-binding protein associated factor Taf2 (predicted)	1	1	1	1	1	0	1	0	1	0	1.2	1.2	1.2	133.91	1172	1172	0.0030928	6.8515	By MS/MS	By matching	1.2	0	0	0	0	0	0	1	0	1				315	5000	TRUE	5239	11198	10803	10803
SPAC3A12.12|atp11|I|mitochondrial	SPAC3A12.12|atp11|I|mitochondrial	2	2	2	>SPAC3A12.12|atp11|I|mitochondrial F1-ATPase chaperone Atp11 (predicted)	1	2	2	2	2	1	2	1	2	1	7.3	7.3	7.3	32.855	286	286	0	12.879	By MS/MS	By MS/MS	7.3	3.1	7202800	5056600	2146200	5056600	0	2	1	3				316	1635;3058	True;True	1705;3187	3542;6613;6614	3406;6342;6343	3406;6343
SPAC3A12.14|cam1|I|calmodulin	SPAC3A12.14|cam1|I|calmodulin	1	1	1	>SPAC3A12.14|cam1|I|calmodulin Cam1	1	1	1	1	0	1	0	1	0	1	7.3	7.3	7.3	16.905	150	150	0.0022831	8.0929	By matching	By MS/MS	0	7.3	3085700	0	3085700	0	2925600	0	1	1				317	3660	TRUE	3806	7765	7424	7424
SPAC3A12.15|vps53|I|GARP	SPAC3A12.15|vps53|I|GARP	9	9	9	>SPAC3A12.15|vps53|I|GARP complex subunit Vps53 (predicted)	1	9	9	9	8	8	8	8	8	8	15.5	15.5	15.5	87.505	756	756	0	67.804	By MS/MS	By MS/MS	14.3	13.6	57639000	26913000	30726000	27688000	28356000	7	6	13				318	163;1136;1336;1598;3526;3646;3945;4428;5599	True;True;True;True;True;True;True;True;True	173;1193;1396;1668;3670;3792;4124;4642;5866	442;443;2426;2427;2830;2831;3473;3474;7512;7739;7740;8637;9949;9950;12453;12454	433;2320;2321;2691;3341;3342;7202;7399;7400;8294;9616;9617;11996;11997	433;2321;2691;3341;7202;7400;8294;9617;11996	116	493
SPAC3A12.18|zwf1|I|glucose-6-phosphate	SPAC3A12.18|zwf1|I|glucose-6-phosphate	11	11	11	>SPAC3A12.18|zwf1|I|glucose-6-phosphate 1-dehydrogenase (predicted)	1	11	11	11	11	10	11	10	11	10	29.2	29.2	29.2	57.204	500	500	0	76.699	By MS/MS	By MS/MS	29.2	27	270820000	145900000	124920000	143340000	121000000	9	8	17				319	622;1743;2336;3223;3276;3777;4555;4756;4981;5394;6129	True;True;True;True;True;True;True;True;True;True;True	653;1817;2430;3359;3413;3925;4776;4983;5220;5645;6419	1365;1366;3758;3759;5170;5171;6941;6942;7036;7037;7998;7999;10230;10231;10715;10716;11168;11947;11948;13515;13516	1318;3618;3619;4944;6656;6657;6749;6750;7650;7651;9872;10342;10343;10775;11504;11505;13012;13013	1318;3619;4944;6656;6750;7651;9872;10342;10775;11505;13013
SPAC3C7.08c|elf1|I|AAA	SPAC3C7.08c|elf1|I|AAA	15	15	15	>SPAC3C7.08c|elf1|I|AAA family ATPase Elf1	1	15	15	15	11	14	11	14	11	14	17.5	17.5	17.5	116.7	1057	1057	0	114.61	By MS/MS	By MS/MS	13	14.8	126550000	82410000	44140000	62011000	62248000	8	13	21				320	65;326;610;881;1033;2300;2821;3425;3738;4866;4987;5652;5722;6006;6568	True;True;True;True;True;True;True;True;True;True;True;True;True;True;True	66;342;638;926;1084;2392;2934;3564;3885;5101;5226;5923;5997;6289;6869	130;765;766;1331;1332;1880;2202;5100;6090;6091;7309;7310;7311;7312;7912;10936;10937;11177;11178;12552;12553;12697;12698;13273;13274;14410;14411	124;747;748;1284;1285;1796;2108;4881;5824;5825;7011;7012;7013;7567;10557;10558;10784;12091;12092;12235;12236;12237;12776;12777;13900;13901	124;748;1284;1796;2108;4881;5824;7012;7567;10558;10784;12091;12237;12777;13901
SPAC3C7.11c|cnx1|I|calnexin	SPAC3C7.11c|cnx1|I|calnexin	3	3	3	>SPAC3C7.11c|cnx1|I|calnexin Cnx1	1	3	3	3	3	2	3	2	3	2	6.8	6.8	6.8	63.465	560	560	0	22.298	By MS/MS	By MS/MS	6.8	4.3	16395000	7620300	8774700	7616900	8322600	3	3	6				321	399;1435;1547	True;True;True	417;1501;1616	899;3049;3050;3259;3260	869;2907;2908;3103;3104;3105	869;2907;3104
SPAC3C7.12|tip1|I|CLIP170	SPAC3C7.12|tip1|I|CLIP170	2	2	2	>SPAC3C7.12|tip1|I|CLIP170 family protein Tip1	1	2	2	2	2	1	2	1	2	1	5.9	5.9	5.9	52.607	461	461	0	13.329	By MS/MS	By MS/MS	5.9	2.8	10788000	7389400	3398400	7389400	0	2	1	3				322	3559;4807	True;True	3703;5040	7574;10825;10826	7257;10451;10452	7257;10452
SPAC3C7.14c|obr1|I|ubiquitinated	SPAC3C7.14c|obr1|I|ubiquitinated	4	4	4	>SPAC3C7.14c|obr1|I|ubiquitinated protein Uhp1	1	4	4	4	4	3	4	3	4	3	22.3	22.3	22.3	21.898	202	202	0	29.992	By MS/MS	By MS/MS	22.3	17.8	63759000	47640000	16119000	45792000	17130000	2	3	5				323	512;2675;4306;6468	True;True;True;True	534;2782;4514;6766	1136;1137;1138;5823;5824;9693;9694;14230	1096;1097;5562;5563;9381;9382;13731	1097;5562;9382;13731
SPAC3F10.03|grs1|I|mitochondrial	SPAC3F10.03|grs1|I|mitochondrial	14	14	14	>SPAC3F10.03|grs1|I|mitochondrial and cytoplasmic glycine-tRNA ligase Grs1	1	14	14	14	13	14	13	14	13	14	25.3	25.3	25.3	74.004	652	652	0	114.07	By MS/MS	By MS/MS	23.3	25.3	176930000	80994000	95935000	87881000	84068000	13	13	26				324	64;317;1801;1921;1982;2023;2331;2716;3378;3977;4204;4772;5349;5721	True;True;True;True;True;True;True;True;True;True;True;True;True;True	65;333;1877;2005;2068;2109;2425;2828;3517;4166;4403;5000;5597;5598;5996	126;127;128;129;746;747;4057;4058;4289;4290;4415;4416;4494;4495;5160;5161;5909;5910;7225;7226;8725;8726;9441;9442;10745;10746;11862;11863;12695;12696	120;121;122;123;729;730;3912;4143;4144;4255;4256;4327;4328;4936;5652;5653;6932;6933;8379;8380;9143;10372;10373;11420;11421;12233;12234	120;729;3912;4143;4255;4328;4936;5652;6932;8380;9143;10372;11420;12233	117	313
SPAC3F10.11c|abc2|I|glutathione	SPAC3F10.11c|abc2|I|glutathione	1	1	1	>SPAC3F10.11c|abc2|I|glutathione S-conjugate-exporting ATPase Abc2	1	1	1	1	0	1	0	1	0	1	0.7	0.7	0.7	166.94	1478	1478	0.003055	6.6606	By matching	By MS/MS	0	0.7	1361900	0	1361900	0	1291200	0	1	1				325	3830	TRUE	3979	8111	7754	7754
SPCC1322.11|rpl2302|III|60S;SPAC3G9.03|rpl2301|I|60S	SPCC1322.11|rpl2302|III|60S;SPAC3G9.03|rpl2301|I|60S	4;4	4;4	4;4	>SPCC1322.11|rpl2302|III|60S ribosomal protein L23;>SPAC3G9.03|rpl2301|I|60S ribosomal protein L23	2	4	4	4	3	4	3	4	3	4	31.7	31.7	31.7	14.882	139	139;139	0	27.138	By MS/MS	By MS/MS	25.9	31.7	64723000	25209000	39514000	27828000	34843000	3	2	5				326	924;2616;3536;4176	True;True;True;True	970;2721;3680;4372	1973;5711;5712;7530;7531;9378;9379	1883;5458;5459;7218;7219;9084;9085	1883;5458;7218;9084
SPAC3G9.05|spa2|I|cell	SPAC3G9.05|spa2|I|cell	7	7	7	>SPAC3G9.05|spa2|I|cell polarity protein Spa2	1	7	7	7	7	7	7	7	7	7	14.3	14.3	14.3	73.872	659	659	0	79.985	By MS/MS	By MS/MS	14.3	14.3	73861000	44550000	29311000	36486000	35853000	7	7	14				327	221;678;2054;3635;4243;5018;5916	True;True;True;True;True;True;True	232;711;2141;3780;4446;5257;6197	548;549;1486;1487;4564;4565;7715;7716;7717;9530;9531;9532;11230;11231;13087;13088	535;536;1432;1433;4391;4392;4393;7380;7381;9226;9227;10833;10834;12600	535;1433;4392;7381;9227;10833;12600
SPAC3G9.06|frs2|I|cytoplasmic	SPAC3G9.06|frs2|I|cytoplasmic	5	5	5	>SPAC3G9.06|frs2|I|cytoplasmic phenylalanine-tRNA ligase alpha subunit Frs2 (predicted)	1	5	5	5	5	3	5	3	5	3	11.8	11.8	11.8	56.266	499	499	0	33.868	By MS/MS	By MS/MS	11.8	6.6	36147000	20078000	16069000	17036000	18277000	4	3	7				328	393;618;3139;3254;6075	True;True;True;True;True	411;649;3270;3391;6365	888;1357;1358;6763;6764;7001;13413;13414	860;1310;1311;6485;6486;6715;12912;12913	860;1311;6485;6715;12913
SPAC3G9.09c|tif211|I|translation	SPAC3G9.09c|tif211|I|translation	9	9	9	>SPAC3G9.09c|tif211|I|translation initiation factor eIF2 alpha subunit	1	9	9	9	7	9	7	9	7	9	35.9	35.9	35.9	34.525	306	306	0	67.71	By MS/MS	By MS/MS	27.5	35.9	70922000	27762000	43159000	33310000	35371000	6	7	13				329	3;524;2916;3002;3047;3724;3746;4024;4908	True;True;True;True;True;True;True;True;True	3;547;3034;3126;3176;3871;3893;4216;5144	4;5;1161;6293;6488;6489;6590;6591;6592;7888;7889;7926;7927;9096;9097;11018;11019	4;5;1118;6022;6220;6316;6317;6318;6319;7542;7543;7580;8816;8817;10632;10633	5;1118;6022;6220;6316;7542;7580;8817;10632
SPAC3H1.05|ste24|I|CAAX	SPAC3H1.05|ste24|I|CAAX	3	3	3	>SPAC3H1.05|ste24|I|CAAX prenyl protease (predicted)	1	3	3	3	2	3	2	3	2	3	5.3	5.3	5.3	54.001	474	474	0	17.761	By MS/MS	By MS/MS	3.8	5.3	8707500	854520	7853000	0	7445300	2	3	5				330	2421;2785;4626	True;True;True	2518;2898;4849	5335;5336;6025;6026;10454	5097;5098;5765;5766;10095	5097;5766;10095
SPAC3H1.07|aru1|I|arginase;SPBP26C9.02c|car1|II|arginase	SPAC3H1.07|aru1|I|arginase;SPBP26C9.02c|car1|II|arginase	2;1	2;1	2;1	>SPAC3H1.07|aru1|I|arginase Aru1;>SPBP26C9.02c|car1|II|arginase Car1	2	2	2	2	2	2	2	2	2	2	6.8	6.8	6.8	35.703	323	323;323	0	14.32	By MS/MS	By MS/MS	6.8	6.8	15937000	8181100	7755900	7627200	7907100	2	2	4				331	178;3033	True;True	188;3161	469;470;6560;6561	460;461;6287;6288	461;6287
SPAC3H1.10|pcs2|I|phytochelatin	SPAC3H1.10|pcs2|I|phytochelatin	1	1	1	>SPAC3H1.10|pcs2|I|phytochelatin synthetase	1	1	1	1	0	1	0	1	0	1	2.7	2.7	2.7	46.741	414	414	0.0023364	8.7377	By matching	By MS/MS	0	2.7	7626200	0	7626200	0	7230300	0	1	1				332	1975	TRUE	2061	4402	4243	4243
SPBC18H10.13|rps1402|II|40S;SPAC3H5.05c|rps1401|I|40S	SPBC18H10.13|rps1402|II|40S;SPAC3H5.05c|rps1401|I|40S	4;4	4;4	4;4	>SPBC18H10.13|rps1402|II|40S ribosomal protein S14 (predicted);>SPAC3H5.05c|rps1401|I|40S ribosomal protein S14 (predicted)	2	4	4	4	4	4	4	4	4	4	52.5	52.5	52.5	14.699	139	139;139	0	80.339	By MS/MS	By MS/MS	52.5	52.5	94522000	45863000	48659000	52067000	39929000	2	3	5				333	2367;4881;5354;5592	True;True;True;True	2462;5116;5603;5858	5232;5233;10964;10965;11871;11872;12440;12441	5004;10583;10584;11428;11429;11983;11984	5004;10583;11429;11984
SPAC3H5.07|rpl702|I|60S	SPAC3H5.07|rpl702|I|60S	5	4	4	>SPAC3H5.07|rpl702|I|60S ribosomal protein L7	1	5	4	4	5	4	4	3	4	3	22	18	18	28.449	250	250	0	24.503	By MS/MS	By MS/MS	22	17.6	22298000	11547000	10751000	10499000	11241000	4	2	6				334	2074;2654;3667;4362;4653	False;True;True;True;True	2161;2760;3813;4573;4878	4604;4605;5778;5779;7777;7778;9808;9809;10513	4431;5522;7438;7439;9495;9496;10152	4431;5522;7439;9496;10152
SPBC11C11.09c|rpl502|II|60S;SPAC3H5.12c|rpl501|I|60S	SPBC11C11.09c|rpl502|II|60S;SPAC3H5.12c|rpl501|I|60S	6;6	6;6	6;6	>SPBC11C11.09c|rpl502|II|60S ribosomal protein L5;>SPAC3H5.12c|rpl501|I|60S ribosomal protein L5 (predicted)	2	6	6	6	6	6	6	6	6	6	27.9	27.9	27.9	33.485	294	294;294	0	45.243	By MS/MS	By MS/MS	27.9	27.9	83266000	37581000	45685000	44565000	36330000	5	6	11				335	1500;1501;1622;1663;5859;5892	True;True;True;True;True;True	1568;1569;1692;1734;6139;6172	3172;3173;3174;3175;3176;3520;3521;3597;3598;12980;12981;13041;13042	3024;3025;3026;3027;3386;3387;3459;3460;12497;12498;12554	3024;3027;3386;3459;12497;12554
SPAC3H8.02|csr102|I|sec14	SPAC3H8.02|csr102|I|sec14	2	2	2	>SPAC3H8.02|csr102|I|sec14 cytosolic factor family, glycerophospholipid-transfer protein Crs102 (predicted)	1	2	2	2	1	2	1	2	1	2	5	5	5	51.473	444	444	0	14.701	By MS/MS	By MS/MS	2	5	3719900	1533600	2186400	0	2072900	1	2	3				336	754;3188	True;True	789;3322	1635;6872;6873	1569;6593;6594	1569;6594
SPAC3H8.07c|pac10|I|prefoldin	SPAC3H8.07c|pac10|I|prefoldin	1	1	1	>SPAC3H8.07c|pac10|I|prefoldin subunit 3 Pac10 (predicted)	1	1	1	1	0	1	0	1	0	1	5.3	5.3	5.3	19.445	169	169	0.0021277	7.2142	By matching	By MS/MS	0	5.3	1661500	0	1661500	0	1575300	0	1	1				337	6279	TRUE	6573	13798	13287	13287
SPAC3H8.10|spo20|I|sec14	SPAC3H8.10|spo20|I|sec14	2	2	2	>SPAC3H8.10|spo20|I|sec14 cytosolic factor family, glycerophospholipid-transfer protein Spo20/Sec14	1	2	2	2	2	1	2	1	2	1	8.4	8.4	8.4	32.746	286	286	0	11.77	By MS/MS	By MS/MS	8.4	5.2	5910400	2207700	3702700	0	3510500	2	0	2				338	3853;4751	True;True	4002;4977	8155;10699;10700	7794;10323;10324	7794;10324
SPAC458.02c|SPAC458.02c|I|mRNP	SPAC458.02c|SPAC458.02c|I|mRNP	1	1	1	>SPAC458.02c|SPAC458.02c|I|mRNP complex (predicted)	1	1	1	1	1	1	1	1	1	1	2.6	2.6	2.6	53.735	468	468	0.0022989	8.2134	By MS/MS	By MS/MS	2.6	2.6	6141400	3284600	2856800	0	2708500	1	1	2				339	4530	TRUE	4749	10165;10166	9811;9812	9811
SPAC458.03|tel2|I|Tel2/Rad-5/Clk-2	SPAC458.03|tel2|I|Tel2/Rad-5/Clk-2	1	1	1	>SPAC458.03|tel2|I|Tel2/Rad-5/Clk-2 family protein Tel2	1	1	1	1	1	1	1	1	1	1	1.2	1.2	1.2	99.049	868	868	0.0023337	8.735	By MS/MS	By MS/MS	1.2	1.2	4258900	2067800	2191000	0	2077300	1	1	2				340	2746	TRUE	2858	5956;5957	5693;5694	5693
SPAC4A8.05c|myp2|I|myosin	SPAC4A8.05c|myp2|I|myosin	6	6	6	>SPAC4A8.05c|myp2|I|myosin II heavy chain Myo3	1	6	6	6	5	4	5	4	5	4	2.6	2.6	2.6	242.57	2104	2104	0	36.64	By MS/MS	By MS/MS	2.2	1.7	20746000	11265000	9480500	9895100	10359000	4	4	8				341	450;1532;2857;3178;4463;5067	True;True;True;True;True;True	470;1601;2970;3312;4679;5307	1001;3234;3235;6162;6163;6856;6857;10022;11324	970;3080;3081;5893;5894;6578;6579;9680;10918	970;3080;5894;6578;9680;10918
SPAC4A8.11c|fas2|I|fatty	SPAC4A8.11c|fas2|I|fatty	24	24	24	>SPAC4A8.11c|fas2|I|fatty acid synthase alpha subunit Fas2	1	24	24	24	20	23	20	23	20	23	16.4	16.4	16.4	202.17	1842	1842	0	198.48	By MS/MS	By MS/MS	13.6	15.6	225680000	82462000	143220000	99982000	118270000	14	22	36				342	485;536;902;1105;1200;1592;1636;2087;2614;2779;2935;2991;3249;3356;3890;3975;4197;5057;5124;5359;5595;6322;6499;6635	True;True;True;True;True;True;True;True;True;True;True;True;True;True;True;True;True;True;True;True;True;True;True;True	506;559;948;1160;1258;1662;1706;2174;2719;2891;3053;3113;3385;3494;4050;4051;4164;4396;5297;5364;5608;5861;6616;6797;6939	1080;1178;1179;1933;1934;2354;2355;2551;3461;3462;3543;3544;4630;4631;5707;5708;6011;6012;6326;6327;6463;6464;6991;7181;7182;8369;8370;8371;8372;8373;8721;8722;9423;9424;11302;11303;11425;11426;11880;12445;12446;13879;13880;14276;14563;14564	1043;1135;1136;1849;1850;2249;2250;2428;3330;3331;3407;4456;4457;5454;5455;5746;5747;6050;6051;6199;6705;6889;6890;8017;8018;8019;8020;8375;8376;9124;9125;10896;11017;11438;11988;11989;13366;13367;13368;13775;14052;14053	1043;1136;1850;2250;2428;3330;3407;4457;5454;5747;6050;6199;6705;6890;8020;8375;9125;10896;11017;11438;11988;13368;13775;14052	118	412
SPAC4A8.12c|sds22|I|protein	SPAC4A8.12c|sds22|I|protein	1	1	1	>SPAC4A8.12c|sds22|I|protein phosphatase regulatory subunit Sds22	1	1	1	1	0	1	0	1	0	1	3.9	3.9	3.9	38.066	332	332	0.0067895	6.1951	By matching	By MS/MS	0	3.9	0	0	0	0	0	0	1	1				343	4169	TRUE	4364	9365	9071	9071
SPAC4A8.13c|pts1|I|20S	SPAC4A8.13c|pts1|I|20S	2	2	2	>SPAC4A8.13c|pts1|I|20S proteasome complex subunit beta 5	1	2	2	2	1	1	1	1	1	1	8.5	8.5	8.5	29.986	272	272	0	13.514	By MS/MS	By MS/MS	5.1	3.3	5973000	5973000	0	5973000	0	0	1	1				344	1739;4401	True;True	1813;4615	3752;9893	3612;9569	3612;9569
SPAC4A8.16c|tif33|I|translation	SPAC4A8.16c|tif33|I|translation	8	8	8	>SPAC4A8.16c|tif33|I|translation initiation factor eIF3c	1	8	8	8	7	8	7	8	7	8	11.9	11.9	11.9	104.37	918	918	0	59.962	By MS/MS	By MS/MS	9.2	11.9	55158000	25861000	29297000	26518000	27120000	7	5	12				345	777;1800;2452;4502;4650;5040;5758;6288	True;True;True;True;True;True;True;True	815;1876;2549;4719;4875;5280;6034;6582	1682;4055;4056;5393;5394;10105;10106;10507;10508;11272;11273;12769;12770;13815;13816	1614;3910;3911;5159;5160;9755;9756;10147;10873;12301;12302;13304;13305	1614;3911;5159;9756;10147;10873;12302;13305
SPAC4C5.02c|ryh1|I|GTPase	SPAC4C5.02c|ryh1|I|GTPase	1	1	1	>SPAC4C5.02c|ryh1|I|GTPase Ryh1	1	1	1	1	0	1	0	1	0	1	5.5	5.5	5.5	23.136	201	201	0.0021978	7.5773	By matching	By MS/MS	0	5.5	7962700	0	7962700	0	7549400	0	1	1				346	3580	TRUE	3724	7612	7293	7293
SPAC4D7.01c|sec71|I|Sec7	SPAC4D7.01c|sec71|I|Sec7	4	4	4	>SPAC4D7.01c|sec71|I|Sec7 domain protein, ARF GEF (predicted)	1	4	4	4	3	4	3	4	3	4	2	2	2	206.93	1811	1811	0	23.096	By MS/MS	By MS/MS	1.6	2	12244000	6104500	6139900	5214000	6711600	2	2	4				347	320;1449;3673;6125	True;True;True;True	336;1515;3819;6415	752;753;3077;3078;7788;7789;13508	734;735;2934;2935;7448;13006	735;2934;7448;13006
SPAC4D7.05|sum1|I|translation	SPAC4D7.05|sum1|I|translation	15	15	15	>SPAC4D7.05|sum1|I|translation initiation factor eIF3i	1	15	15	15	14	13	14	13	14	13	53.4	53.4	53.4	36.811	328	328	0	122.18	By MS/MS	By MS/MS	48.8	50	380240000	189970000	190270000	194470000	163300000	16	13	29				348	218;484;719;1633;1746;1945;2527;3899;3941;3942;5178;5711;5919;6093;6298	True;True;True;True;True;True;True;True;True;True;True;True;True;True;True	229;505;754;1703;1820;2031;2627;4061;4062;4120;4121;5421;5986;6200;6383;6592	543;544;1079;1560;1561;3539;3540;3764;3765;4341;4342;5540;5541;8388;8389;8390;8391;8630;8631;8632;11531;12675;12676;13093;13094;13447;13448;13832;13833	530;531;1042;1496;1497;3403;3404;3624;3625;4191;4192;5300;5301;8032;8033;8034;8035;8287;8288;8289;11117;12214;12604;12605;12945;12946;12947;13321;13322	531;1042;1496;3403;3625;4191;5300;8035;8287;8289;11117;12214;12604;12945;13321	119;120;121	1;76;116
SPAC4D7.08c|ade4|I|amidophosphoribosyltransferase	SPAC4D7.08c|ade4|I|amidophosphoribosyltransferase	4	4	4	>SPAC4D7.08c|ade4|I|amidophosphoribosyltransferase Ade4	1	4	4	4	2	4	2	4	2	4	7.7	7.7	7.7	59.831	533	533	0	25.998	By MS/MS	By MS/MS	3.6	7.7	13059000	6301600	6757000	6265900	6441900	1	4	5				349	931;2325;2625;5389	True;True;True;True	978;2419;2730;5640	1989;1990;5149;5727;5728;11939	1899;4924;5473;5474;11496	1899;4924;5474;11496
SPAC4D7.09|tif223|I|translation	SPAC4D7.09|tif223|I|translation	7	7	7	>SPAC4D7.09|tif223|I|translation initiation factor eIF2B gamma subunit	1	7	7	7	5	6	5	6	5	6	18.1	18.1	18.1	50.461	458	458	0	52.547	By MS/MS	By MS/MS	14.4	13.5	37264000	15317000	21947000	16495000	19630000	5	6	11				350	1469;1678;2253;2468;3125;3752;4512	True;True;True;True;True;True;True	1536;1751;2345;2566;3256;3899;4730	3114;3629;5017;5018;5421;5422;6739;6740;7938;7939;10126	2969;3488;4808;4809;5187;5188;6463;6464;7591;7592;9770	2969;3488;4808;5188;6463;7591;9770
SPAC4D7.10c|spt20|I|SAGA	SPAC4D7.10c|spt20|I|SAGA	6	6	6	>SPAC4D7.10c|spt20|I|SAGA complex subunit Spt20	1	6	6	6	5	5	5	5	5	5	14.2	14.2	14.2	54.028	473	473	0	41.704	By MS/MS	By MS/MS	11	10.8	23763000	11778000	11985000	13790000	9350600	2	3	5				351	414;1338;2825;3567;4495;4958	True;True;True;True;True;True	433;1398;2938;3711;4712;5196	928;2834;6098;6099;7587;7588;10091;10092;11116;11117	896;2694;5831;7270;7271;9744;10723;10724	896;2694;5831;7271;9744;10723
SPAC4F10.02|aap1|I|aspartyl	SPAC4F10.02|aap1|I|aspartyl	1	1	1	>SPAC4F10.02|aap1|I|aspartyl metalloaminopeptidase Aap1	1	1	1	1	1	0	1	0	1	0	2.8	2.8	2.8	51.74	467	467	0.0022075	7.6308	By MS/MS	By matching	2.8	0	0	0	0	0	0	1	0	1				352	2771	TRUE	2883	6000	5735	5735
SPAC4F10.10c|mnn9|I|mannosyltransferase	SPAC4F10.10c|mnn9|I|mannosyltransferase	1	1	1	>SPAC4F10.10c|mnn9|I|mannosyltransferase complex subunit, Anp family Mnn9 (predicted)	1	1	1	1	0	1	0	1	0	1	3.9	3.9	3.9	38.296	337	337	0.0030457	6.61	By matching	By MS/MS	0	3.9	1865000	0	1865000	0	1768200	0	1	1				353	4141	TRUE	4334	9314	9022	9022
SPAC4F10.11|spn1|I|mitotic	SPAC4F10.11|spn1|I|mitotic	4	4	4	>SPAC4F10.11|spn1|I|mitotic septin Spn1	1	4	4	4	2	4	2	4	2	4	8.1	8.1	8.1	53.737	469	469	0	21.869	By MS/MS	By MS/MS	4.5	8.1	15497000	669450	14827000	0	14057000	2	1	3				354	4574;5217;5440;6069	True;True;True;True	4795;5461;5694;6357	10269;11603;12041;12042;13400;13401	9904;11182;11596;12898;12899	9904;11182;11596;12898
SPAC4F10.14c|btf3|I|nascent	SPAC4F10.14c|btf3|I|nascent	1	1	1	>SPAC4F10.14c|btf3|I|nascent polypeptide-associated complex beta subunit	1	1	1	1	1	1	1	1	1	1	11.9	11.9	11.9	16.202	151	151	0.0023529	8.9318	By MS/MS	By MS/MS	11.9	11.9	16472000	6776700	9694900	0	9191600	1	1	2				355	404	TRUE	422	908;909	877;878	877
SPAC4F10.20|grx1|I|glutaredoxin	SPAC4F10.20|grx1|I|glutaredoxin	3	3	3	>SPAC4F10.20|grx1|I|glutaredoxin Grx1	1	3	3	3	3	2	3	2	3	2	33.7	33.7	33.7	11.261	101	101	0	25.978	By MS/MS	By MS/MS	33.7	23.8	38856000	25173000	13683000	22063000	16082000	3	2	5				356	2232;2877;5689	True;True;True	2323;2993;5964	4973;4974;6205;6206;12635	4769;4770;5934;5935;12173	4770;5934;12173
SPAC4F8.07c|hxk2|I|hexokinase	SPAC4F8.07c|hxk2|I|hexokinase	19	19	19	>SPAC4F8.07c|hxk2|I|hexokinase 2	1	19	19	19	17	17	17	17	17	17	44.2	44.2	44.2	50.92	455	455	0	161.83	By MS/MS	By MS/MS	40.7	43.3	317650000	130920000	186720000	154540000	153410000	18	17	35				357	297;637;667;914;1088;1530;1838;1839;2364;2936;3339;3943;4300;4779;4801;5797;5798;5887;6405	True;True;True;True;True;True;True;True;True;True;True;True;True;True;True;True;True;True;True	311;668;699;960;1143;1599;1915;1916;2459;3054;3477;4122;4508;5007;5033;6073;6074;6167;6700	699;700;1399;1400;1466;1954;1955;2320;2321;3231;3232;4129;4130;4131;5226;5227;6328;6329;7152;7153;8633;8634;9677;9678;10760;10813;10814;12854;12855;12856;13032;13033;14052;14053	685;686;1350;1351;1352;1414;1868;1869;2218;3077;3078;3979;3980;3981;4998;4999;6052;6053;6863;6864;8290;8291;9363;9364;9365;9366;10387;10439;10440;12382;12383;12384;12545;12546;13533;13534	686;1352;1414;1868;2218;3078;3979;3981;4998;6052;6864;8290;9364;10387;10440;12383;12384;12546;13533	122	289
SPAC4F8.12c|spp42|I|U5	SPAC4F8.12c|spp42|I|U5	2	2	2	>SPAC4F8.12c|spp42|I|U5 snRNP complex subunit Spp42	1	2	2	2	2	1	2	1	2	1	0.9	0.9	0.9	274.55	2363	2363	0	10.852	By MS/MS	By matching	0.9	0.6	692190000	354350000	337840000	0	320300000	2	0	2				358	2717;6341	True;True	2829;6635	5911;13918;13919	5654;13406	5654;13406
SPAC4F8.13c|rng2|I|IQGAP	SPAC4F8.13c|rng2|I|IQGAP	1	1	1	>SPAC4F8.13c|rng2|I|IQGAP	1	1	1	1	1	1	1	1	1	1	0.7	0.7	0.7	171.67	1489	1489	0.0021322	7.2305	By MS/MS	By matching	0.7	0.7	2981400	1682600	1298800	0	1231300	1	0	1				359	6040	TRUE	6324	13337;13338	12841	12841
SPAC4F8.14c|hcs1|I|3-hydroxy-3-methylglutaryl-CoA	SPAC4F8.14c|hcs1|I|3-hydroxy-3-methylglutaryl-CoA	5	5	5	>SPAC4F8.14c|hcs1|I|3-hydroxy-3-methylglutaryl-CoA synthase	1	5	5	5	4	4	4	4	4	4	16.1	16.1	16.1	49.238	447	447	0	49.858	By MS/MS	By MS/MS	13.9	11.9	48207000	22914000	25293000	24080000	22813000	4	3	7				360	3165;3478;3870;5564;6637	True;True;True;True;True	3296;3618;4022;5828;6941	6809;6810;7414;8188;8189;12365;14566;14567	6528;6529;7106;7829;7830;11915;14055;14056	6529;7106;7830;11915;14056
SPAC4G8.03c|puf5|I|pumilio	SPAC4G8.03c|puf5|I|pumilio	1	1	1	>SPAC4G8.03c|puf5|I|pumilio family RNA-binding protein Puf5 (predicted)	1	1	1	1	1	0	1	0	1	0	1.4	1.4	1.4	88.227	780	780	0.0040241	6.4977	By MS/MS	By matching	1.4	0	960970	960970	0	960970	0	1	0	1				361	6058	TRUE	6344	13375	12874	12874
SPAC4G8.05|ppk14|I|serine/threonine	SPAC4G8.05|ppk14|I|serine/threonine	3	3	3	>SPAC4G8.05|ppk14|I|serine/threonine protein kinase Ppk14 (predicted)	1	3	3	3	2	3	2	3	2	3	7.2	7.2	7.2	63.482	566	566	0	18.743	By MS/MS	By MS/MS	3	7.2	15855000	4248500	11606000	5047300	10205000	1	3	4				362	739;2216;4305	True;True;True	774;2307;4513	1604;4941;4942;9691;9692	1539;4743;4744;9379;9380	1539;4743;9380
SPAC4G9.08c|rpc2|I|DNA-directed	SPAC4G9.08c|rpc2|I|DNA-directed	3	3	3	>SPAC4G9.08c|rpc2|I|DNA-directed RNA polymerase III complex subunit Rpc2	1	3	3	3	2	3	2	3	2	3	3.1	3.1	3.1	130.24	1165	1165	0	16.899	By matching	By MS/MS	1.7	3.1	6822500	1896500	4926000	2954500	3612300	0	2	2				363	2597;3506;3901	True;True;True	2700;3648;4064	5672;5673;7468;8394;8395	5424;7156;8038	5424;7156;8038
SPAC4G9.09c|arg11|I|N-acetyl-gamma-glutamyl-phosphate	SPAC4G9.09c|arg11|I|N-acetyl-gamma-glutamyl-phosphate	9	9	9	>SPAC4G9.09c|arg11|I|N-acetyl-gamma-glutamyl-phosphate reductase/acetylglutamate kinase	1	9	9	9	7	7	7	7	7	7	13.6	13.6	13.6	97.704	885	885	0	63.868	By MS/MS	By MS/MS	10.7	9.8	58703000	21258000	37445000	23303000	33456000	4	7	11				364	1077;1099;2058;2107;2590;4128;4138;5255;6555	True;True;True;True;True;True;True;True;True	1132;1154;2145;2196;2693;4321;4331;5500;6856	2303;2344;2345;4573;4679;4680;4681;5659;9289;9290;9309;9310;11677;11678;14384	2202;2240;2241;4402;4504;4505;4506;5412;8999;9017;9018;11249;11250;13875	2202;2241;4402;4504;5412;8999;9018;11249;13875
SPAC4G9.13c|vps26|I|retromer	SPAC4G9.13c|vps26|I|retromer	3	3	3	>SPAC4G9.13c|vps26|I|retromer complex subunit Vps26	1	3	3	3	0	3	0	3	0	3	10.4	10.4	10.4	35.779	298	298	0	20.731	By matching	By MS/MS	0	10.4	1246700	0	1246700	0	1182000	0	3	3				365	1335;2226;2827	True;True;True	1395;2317;2940	2829;4961;6102	2690;4759;5834	2690;4759;5834
SPAC4G9.16c|rpl901|I|60S	SPAC4G9.16c|rpl901|I|60S	4	2	2	>SPAC4G9.16c|rpl901|I|60S ribosomal protein L9	1	4	2	2	4	4	2	2	2	2	25.3	15.8	15.8	21.513	190	190	0	56.23	By MS/MS	By MS/MS	25.3	25.3	52204000	25626000	26578000	26498000	24326000	2	2	4				366	706;1418;1431;5273	True;False;False;True	741;1484;1497;5518	1538;1539;3018;3019;3040;3041;11715;11716	1478;1479;2875;2876;2896;2897;11285;11286	1478;2876;2896;11286
SPAC4H3.08|SPAC4H3.08|I|3-hydroxyacyl-CoA	SPAC4H3.08|SPAC4H3.08|I|3-hydroxyacyl-CoA	2	2	2	>SPAC4H3.08|SPAC4H3.08|I|3-hydroxyacyl-CoA dehydrogenase (predicted)	1	2	2	2	0	2	0	2	0	2	11.2	11.2	11.2	31.336	286	286	0	15.438	By matching	By MS/MS	0	11.2	6786900	0	6786900	0	6434600	0	2	2				367	1849;6059	True;True	1926;6345	4152;13376	4001;12875	4001;12875
SPAC4H3.10c|pyk1|I|pyruvate	SPAC4H3.10c|pyk1|I|pyruvate	36	36	36	>SPAC4H3.10c|pyk1|I|pyruvate kinase	1	36	36	36	34	34	34	34	34	34	75.6	75.6	75.6	55.514	509	509	0	323.31	By MS/MS	By MS/MS	74.9	69.2	1787700000	851090000	936580000	758130000	794170000	47	43	90				368	86;117;263;422;423;588;606;1153;1238;1677;1753;1932;2384;2510;2513;2842;2843;2886;3600;3927;4053;4353;4634;4635;4644;4699;5090;5356;5357;5358;5422;5624;5730;5787;6056;6601	True;True;True;True;True;True;True;True;True;True;True;True;True;True;True;True;True;True;True;True;True;True;True;True;True;True;True;True;True;True;True;True;True;True;True;True	91;124;125;276;441;442;613;633;634;1210;1297;1750;1827;2017;2018;2479;2609;2612;2955;2956;3003;3744;4102;4103;4245;4246;4564;4857;4858;4868;4924;5330;5605;5606;5607;5675;5676;5891;6005;6063;6342;6904;6905	183;184;353;354;355;356;357;632;633;634;635;636;944;945;946;947;1275;1323;1324;1325;2455;2456;2631;2632;3626;3627;3628;3828;3829;4312;4313;4314;4315;4316;5265;5266;5501;5502;5503;5508;5509;6128;6129;6130;6131;6132;6133;6223;6224;7650;7651;8591;8592;8593;8594;8595;8596;9151;9152;9153;9154;9792;10467;10468;10469;10470;10489;10490;10598;11362;11874;11875;11876;11877;11878;11879;12008;12009;12010;120…	174;175;343;344;345;346;347;348;349;614;615;616;617;618;912;913;914;915;1223;1277;1278;1279;2350;2496;2497;3486;3487;3685;3686;4160;4161;4162;4163;4164;4165;4166;5034;5035;5262;5263;5264;5269;5270;5860;5861;5862;5863;5864;5865;5951;7323;7324;8248;8249;8250;8251;8252;8253;8867;8868;8869;8870;9481;10106;10107;10108;10109;10129;10130;10229;10955;11431;11432;11433;11434;11435;11436;11437;11566;11567;…	174;349;615;912;914;1223;1277;2350;2496;3486;3686;4166;5034;5263;5269;5860;5865;5951;7323;8251;8870;9481;10106;10109;10130;10229;10955;11432;11435;11436;11567;12041;12250;12365;12871;13970	123;124;125;126;127;128;129;130;131;132	52;57;116;133;216;268;337;355;375;430
SPAC4H3.14c|rng8|I|contractile	SPAC4H3.14c|rng8|I|contractile	15	15	15	>SPAC4H3.14c|rng8|I|contractile ring myosin V regulator Rng8	1	15	15	15	15	15	15	15	15	15	52.2	52.2	52.2	39.799	345	345	0	234.34	By MS/MS	By MS/MS	52.2	52.2	414540000	221920000	192620000	203430000	197730000	18	16	34				369	599;898;1817;2056;2610;2669;2858;2961;3693;4190;4476;4477;4485;5534;6148	True;True;True;True;True;True;True;True;True;True;True;True;True;True;True	625;944;1893;2143;2715;2775;2971;3079;3080;3839;4389;4692;4693;4701;5796;6439	1305;1306;1916;1917;4088;4089;4568;4569;5700;5701;5805;5806;6164;6165;6374;6375;6376;7823;7824;7825;7826;9411;9412;10044;10045;10046;10047;10061;10062;10063;10064;12282;12283;13548;13549	1254;1255;1256;1832;3940;3941;4396;4397;5447;5448;5546;5547;5895;6098;6099;6100;7480;7481;7482;7483;9114;9115;9701;9702;9703;9704;9718;9719;9720;11828;11829;11830;11831;11832;13044;13045	1254;1832;3940;4397;5448;5546;5895;6098;7480;9114;9701;9704;9720;11832;13045	133	74
SPCP31B10.07|eft202|III|translation;SPAC513.01c|eft201|I|translation	SPCP31B10.07|eft202|III|translation;SPAC513.01c|eft201|I|translation	47;47	47;47	46;46	>SPCP31B10.07|eft202|III|translation elongation factor 2 (EF-2) Eft2,B;>SPAC513.01c|eft201|I|translation elongation factor 2 (EF-2) Eft2,A	2	47	47	46	43	47	43	47	42	46	64.3	64.3	63.1	93.23	842	842;842	0	323.31	By MS/MS	By MS/MS	55	64.3	3058300000	1357800000	1700500000	1280600000	1434700000	62	58	120				370	112;142;323;492;493;551;752;814;987;1148;1150;1193;1456;1486;1569;1727;1754;1828;1951;2387;2414;2605;2606;2678;2695;2696;2728;2814;2848;2852;2870;2907;3166;3167;3762;3822;4002;4151;4180;4670;4906;5215;5684;5741;5908;6176;6217	True;True;True;True;True;True;True;True;True;True;True;True;True;True;True;True;True;True;True;True;True;True;True;True;True;True;True;True;True;True;True;True;True;True;True;True;True;True;True;True;True;True;True;True;True;True;True	118;119;151;152;339;513;514;574;787;853;1036;1037;1205;1207;1250;1251;1522;1523;1554;1639;1801;1828;1905;2037;2482;2509;2510;2511;2709;2710;2711;2785;2805;2806;2840;2927;2961;2965;2985;2986;3025;3297;3298;3909;3971;4191;4192;4344;4378;4895;5142;5459;5956;5957;6016;6189;6468;6510	230;231;232;233;401;402;403;404;758;759;760;1094;1095;1096;1097;1206;1207;1629;1630;1631;1632;1746;1747;2099;2100;2101;2102;2103;2445;2446;2449;2530;2531;2532;2533;3088;3089;3090;3091;3145;3146;3419;3420;3730;3731;3830;3831;4112;4113;4352;4353;4354;4355;5269;5321;5322;5323;5324;5325;5689;5690;5691;5692;5693;5694;5829;5830;5866;5867;5868;5869;5870;5928;5929;6077;6144;6145;6153;6154;6191;6192;6193;…	218;219;220;221;222;392;393;394;395;740;741;742;743;1056;1057;1058;1059;1060;1160;1161;1563;1564;1565;1566;1676;1677;2010;2011;2012;2013;2340;2341;2344;2411;2412;2413;2414;2944;2945;2946;2947;2998;2999;3287;3288;3289;3290;3590;3687;3963;3964;4199;4200;4201;4202;5038;5082;5083;5084;5085;5086;5087;5088;5437;5438;5439;5440;5441;5569;5570;5571;5605;5606;5607;5608;5670;5812;5876;5877;5878;5886;5887;59…	218;393;743;1058;1060;1161;1565;1676;2011;2340;2344;2412;2944;2998;3287;3590;3687;3963;4201;5038;5084;5438;5441;5570;5605;5607;5670;5812;5876;5887;5925;6006;6532;6534;7610;7741;8748;9039;9097;10180;10629;11176;12157;12269;12587;13096;13183	134;135;136;137;138;139;140;141;142;143;144;145	275;335;337;361;379;437;438;573;588;593;619;676
SPAC513.07|SPAC513.07|I|flavonol	SPAC513.07|SPAC513.07|I|flavonol	4	4	4	>SPAC513.07|SPAC513.07|I|flavonol reductase/cinnamoyl-CoA reductase family	1	4	4	4	4	1	4	1	4	1	15.5	15.5	15.5	37.461	336	336	0	31.231	By MS/MS	By matching	15.5	3.9	9834000	7897800	1936200	7897800	0	2	0	2				371	711;837;1947;5130	True;True;True;True	746;879;2033;5372	1548;1794;4345;4346;11442	1485;1719;4194;11036	1485;1719;4194;11036
SPAC521.03|SPAC521.03|I|short	SPAC521.03|SPAC521.03|I|short	3	3	3	>SPAC521.03|SPAC521.03|I|short chain dehydrogenase (predicted)	1	3	3	3	3	2	3	2	3	2	16.2	16.2	16.2	28.148	259	259	0	22.894	By MS/MS	By MS/MS	16.2	12.7	18758000	13068000	5689500	13068000	0	2	3	5				372	4235;5468;6431	True;True;True	4438;5722;6726	9517;9518;12114;12115;12116;14154	9214;9215;11666;11667;11668;13661	9214;11667;13661
SPAC56E4.03|SPAC56E4.03|I|aromatic	SPAC56E4.03|SPAC56E4.03|I|aromatic	7	7	7	>SPAC56E4.03|SPAC56E4.03|I|aromatic aminotransferase (predicted)	1	7	7	7	6	6	6	6	6	6	19	19	19	53.166	474	474	0	51.061	By MS/MS	By MS/MS	17.1	15.4	34940000	17242000	17697000	17164000	16857000	6	5	11				373	151;760;1092;2505;4484;5912;6495	True;True;True;True;True;True;True	161;795;1147;2604;4700;6193;6793	419;1646;1647;2328;2329;5492;10059;10060;13079;13080;14270;14271	410;1579;1580;2225;2226;5254;9716;9717;12594;12595;13771	410;1580;2226;5254;9716;12595;13771
SPAC56E4.04c|cut6|I|acetyl-CoA/biotin	SPAC56E4.04c|cut6|I|acetyl-CoA/biotin	41	41	41	>SPAC56E4.04c|cut6|I|acetyl-CoA/biotin carboxylase	1	41	41	41	39	34	39	34	39	34	22.9	22.9	22.9	256.84	2280	2280	0	321.35	By MS/MS	By MS/MS	21.8	18.9	479480000	244280000	235210000	220650000	218240000	35	34	69				374	149;505;522;556;651;664;775;1131;1557;1829;1911;1912;2113;2153;2455;2485;2735;2759;2760;2802;3211;3325;3498;3523;3651;3906;4059;4189;4315;4608;4685;4777;5174;5185;5375;5603;5768;5918;6119;6182;6467	True;True;True;True;True;True;True;True;True;True;True;True;True;True;True;True;True;True;True;True;True;True;True;True;True;True;True;True;True;True;True;True;True;True;True;True;True;True;True;True;True	159;526;545;580;683;696;812;1186;1627;1906;1994;1995;2202;2243;2552;2583;2584;2847;2871;2872;2915;3346;3463;3640;3667;3797;4071;4252;4387;4388;4525;4830;4910;5005;5417;5428;5626;5870;6044;6199;6409;6474;6765	416;1117;1118;1158;1159;1216;1427;1428;1429;1458;1459;1674;1675;2411;2412;3278;4114;4115;4268;4269;4270;4271;4691;4692;4693;4694;4776;5399;5453;5454;5455;5939;5940;5977;5978;5979;6056;6057;6916;6917;7127;7128;7455;7456;7499;7500;7747;7748;8412;8413;9165;9166;9407;9408;9409;9410;9716;9717;10334;10335;10569;10570;10756;10757;11525;11544;11545;11912;12461;12462;12788;12789;13091;13092;13496;13497;13…	407;1079;1080;1115;1116;1169;1376;1377;1378;1406;1407;1606;1607;2305;2306;3121;3965;3966;4126;4127;4515;4516;4517;4518;4595;5165;5218;5219;5220;5680;5681;5714;5715;5716;5792;5793;6633;6634;6840;6841;7145;7186;7187;7188;7407;7408;8054;8055;8881;8882;9110;9111;9112;9113;9403;9404;9962;9963;10201;10202;10382;10383;10384;11112;11130;11468;12002;12003;12317;12318;12603;12995;12996;13106;13729;13730	407;1080;1115;1169;1377;1406;1606;2306;3121;3965;4126;4127;4515;4595;5165;5218;5681;5715;5716;5793;6633;6841;7145;7188;7407;8055;8882;9113;9403;9962;10202;10384;11112;11130;11468;12002;12317;12603;12995;13106;13729	146;147	355;999
SPAC56F8.03|tif52|I|translation	SPAC56F8.03|tif52|I|translation	4	4	4	>SPAC56F8.03|tif52|I|translation initiation factor eIF5B Tif52 (predicted)	1	4	4	4	4	2	4	2	4	2	4.6	4.6	4.6	119.93	1079	1079	0	27.536	By MS/MS	By MS/MS	4.6	3	15596000	12213000	3382800	12213000	0	4	1	5				375	327;2638;3598;5589	True;True;True;True	343;2744;3742;5855	767;768;5748;7646;7647;12435	749;750;5493;7320;7321;11980	749;5493;7321;11980
SPAC56F8.05c|mug64|I|BAR	SPAC56F8.05c|mug64|I|BAR	3	3	3	>SPAC56F8.05c|mug64|I|BAR domain protein (predicted)	1	3	3	3	3	2	3	2	3	2	14.3	14.3	14.3	31.747	286	286	0	18.974	By MS/MS	By MS/MS	14.3	8	15911000	7644700	8266200	0	7837100	2	1	3				376	1392;2603;4131	True;True;True	1457;2707;4324	2966;2967;5685;5686;9295	2822;2823;5435;9003	2822;5435;9003
SPAC57A10.02|cdr2|I|serine/threonine	SPAC57A10.02|cdr2|I|serine/threonine	3	3	3	>SPAC57A10.02|cdr2|I|serine/threonine protein kinase Cdr2	1	3	3	3	2	3	2	3	2	3	4.1	4.1	4.1	85.971	775	775	0	20.532	By MS/MS	By MS/MS	2.2	4.1	11996000	2698100	9297800	0	8815100	2	3	5				377	2375;4036;5550	True;True;True	2470;4228;5813	5250;5251;9123;12339;12340	5018;5019;8841;11889;11890	5018;8841;11890
SPAC57A7.04c|pabp|I|mRNA	SPAC57A7.04c|pabp|I|mRNA	6	6	6	>SPAC57A7.04c|pabp|I|mRNA export shuttling protein	1	6	6	6	6	6	6	6	6	6	9.6	9.6	9.6	71.512	653	653	0	45.735	By MS/MS	By MS/MS	9.6	9.6	61568000	29756000	31812000	26488000	33429000	6	4	10				378	90;280;305;373;4620;6588	True;True;True;True;True;True	95;293;319;390;4843;6891	189;190;665;666;715;716;849;850;10443;10444;14457;14458	180;650;651;700;701;823;10082;10083;13947;13948	180;650;700;823;10082;13947
SPAC57A7.08|pzh1|I|serine/threonine;SPCC31H12.05c|sds21|III|serine/threonine	SPAC57A7.08|pzh1|I|serine/threonine	8;1	8;1	8;1	>SPAC57A7.08|pzh1|I|serine/threonine protein phosphatase Pzh1	2	8	8	8	5	8	5	8	5	8	19.4	19.4	19.4	57.131	515	515;322	0	106.73	By MS/MS	By MS/MS	15	19.4	79844000	27124000	52720000	33834000	43273000	4	7	11				379	203;1029;1993;2206;2697;3310;4579;6575	True;True;True;True;True;True;True;True	213;1079;2079;2297;2807;3448;4800;6877	513;2192;2193;4435;4436;4916;4917;5871;5872;7100;10277;10278;14427	502;2099;2100;4276;4277;4722;4723;5609;5610;6815;9912;9913;13919	502;2099;4276;4722;5609;6815;9913;13919
SPAC57A7.10c|sec21|I|coatomer	SPAC57A7.10c|sec21|I|coatomer	24	24	24	>SPAC57A7.10c|sec21|I|coatomer gamma subunit Sec21 (predicted)	1	24	24	24	19	22	19	22	19	22	32.2	32.2	32.2	100.93	905	905	0	198.96	By MS/MS	By MS/MS	25.2	30.6	288580000	106990000	181590000	110890000	168260000	15	20	35				380	42;283;800;1201;1372;2313;2512;2586;2611;2657;2847;2869;3204;4093;4383;4438;4734;4928;5066;5264;5770;5932;6340;6505	True;True;True;True;True;True;True;True;True;True;True;True;True;True;True;True;True;True;True;True;True;True;True;True	42;296;838;1259;1435;2407;2611;2689;2716;2763;2960;2984;3339;4286;4595;4653;4960;5166;5306;5509;6046;6213;6634;6803	80;81;82;670;671;1721;2552;2553;2903;5128;5506;5507;5652;5653;5702;5703;5784;6142;6143;6190;6905;9224;9225;9855;9856;9969;9970;10666;10667;11055;11056;11322;11323;11693;11694;12792;13118;13119;13915;13916;13917;14285;14286	75;76;656;1652;2429;2761;4906;5267;5268;5404;5405;5449;5450;5526;5873;5874;5875;5921;6622;8937;9534;9535;9633;9634;10291;10667;10668;10916;10917;11266;11267;12321;12626;12627;12628;13404;13405;13782;13783	76;656;1652;2429;2761;4906;5268;5404;5449;5526;5875;5921;6622;8937;9535;9634;10291;10667;10917;11266;12321;12628;13404;13783	148	261
SPAC57A7.12|ssz1|I|heat	SPAC57A7.12|ssz1|I|heat	2	2	2	>SPAC57A7.12|ssz1|I|heat shock protein Ssz1 (predicted)	1	2	2	2	2	2	2	2	2	2	3.9	3.9	3.9	61.285	566	566	0	13.077	By MS/MS	By MS/MS	3.9	3.9	7266800	3510400	3756400	0	3561400	3	2	5				381	5696;6404	True;True	5971;6699	12645;12646;14050;14051	12184;12185;12186;13531;13532	12185;13531
SPAC589.06c|SPAC589.06c|I|pho88	SPAC589.06c|SPAC589.06c|I|pho88	1	1	1	>SPAC589.06c|SPAC589.06c|I|pho88 family protein (predicted)	1	1	1	1	1	1	1	1	1	1	7.9	7.9	7.9	21.742	202	202	0.0023041	8.3492	By MS/MS	By MS/MS	7.9	7.9	3668400	0	3668400	0	3477900	1	1	2				382	4783	TRUE	5011	10768;10769	10395;10396	10396
SPAC5D6.13|vps74|I|Golgi	SPAC5D6.13|vps74|I|Golgi	2	2	2	>SPAC5D6.13|vps74|I|Golgi phosphoprotein 3 family Vps74 (predicted)	1	2	2	2	1	2	1	2	1	2	5.3	5.3	5.3	38.375	337	337	0	11.938	By MS/MS	By MS/MS	2.4	5.3	7709500	3639900	4069600	0	3858300	1	1	2				383	1670;6251	True;True	1743;6544	3614;13743;13744	3475;13234	3475;13234
SPAC5H10.03|SPAC5H10.03|I|phosphoglycerate	SPAC5H10.03|SPAC5H10.03|I|phosphoglycerate	1	1	1	>SPAC5H10.03|SPAC5H10.03|I|phosphoglycerate mutase family	1	1	1	1	1	1	1	1	1	1	5.9	5.9	5.9	24.716	219	219	0.0022472	7.8017	By MS/MS	By MS/MS	5.9	5.9	7226400	3894400	3332000	0	3159100	1	0	1				384	2823	TRUE	2936	6094;6095	5828;5829	5828
SPAC5H10.05c|SPAC5H10.05c|I|FAD	SPAC5H10.05c|SPAC5H10.05c|I|FAD	2	2	2	>SPAC5H10.05c|SPAC5H10.05c|I|FAD binding oxidoreductase (predicted)	1	2	2	2	2	1	2	1	2	1	21.9	21.9	21.9	22.104	196	196	0	21.254	By MS/MS	By MS/MS	21.9	8.2	10070000	7231700	2838000	7231700	0	2	1	3				385	822;2565	True;True	861;2666	1760;5608;5609	1687;5364;5365	1687;5364
SPAC5H10.06c|adh4|I|alcohol	SPAC5H10.06c|adh4|I|alcohol	6	6	6	>SPAC5H10.06c|adh4|I|alcohol dehydrogenase Adh4	1	6	6	6	5	6	5	6	5	6	17.2	17.2	17.2	40.674	379	379	0	45.074	By MS/MS	By MS/MS	13.2	17.2	83020000	27028000	55992000	33491000	46623000	2	3	5				386	1284;2270;2694;2729;4266;4361	True;True;True;True;True;True	1344;2362;2804;2841;4472;4572	2723;2724;5049;5050;5863;5864;5865;5930;5931;9586;9587;9807	2581;4834;5603;5604;5671;5672;9277;9278;9494	2581;4834;5604;5672;9277;9494
SPAC607.05|rpn9|I|19S	SPAC607.05|rpn9|I|19S	1	1	1	>SPAC607.05|rpn9|I|19S proteasome regulatory subunit Rpn9	1	1	1	1	0	1	0	1	0	1	3.1	3.1	3.1	43.457	381	381	0.0021668	7.3951	By matching	By MS/MS	0	3.1	0	0	0	0	0	0	1	1				387	2658	TRUE	2764	5785	5527	5527
SPAC630.03|arp3|I|Arp2/3	SPAC630.03|arp3|I|Arp2/3	5	5	5	>SPAC630.03|arp3|I|Arp2/3 protein complex, actin-like protein subunit Arp3	1	5	5	5	4	5	4	5	4	5	14.8	14.8	14.8	47.373	427	427	0	39.662	By MS/MS	By MS/MS	12.6	14.8	46190000	15474000	30716000	17894000	26701000	4	4	8				388	856;4099;4727;4890;6383	True;True;True;True;True	900;4292;4952;5125;6678	1830;1831;9234;9235;10653;10982;10983;14003;14004	1752;8946;8947;10279;10602;10603;13486;13487	1752;8947;10279;10603;13486
SPAC630.08c|erg25|I|C-4	SPAC630.08c|erg25|I|C-4	2	2	2	>SPAC630.08c|erg25|I|C-4 methylsterol oxidase Erg25 (predicted)	1	2	2	2	2	2	2	2	2	2	5.3	5.3	5.3	35.802	300	300	0	13.322	By MS/MS	By MS/MS	5.3	5.3	23679000	8862200	14817000	8953100	13957000	2	1	3				389	3189;6364	True;True	3323;6659	6874;6875;13971;13972	6595;6596;13456	6595;13456
SPAC630.09c|mug58|I|GLYK	SPAC630.09c|mug58|I|GLYK	1	1	1	>SPAC630.09c|mug58|I|GLYK family kinase of unknown specificity (predicted)	1	1	1	1	1	0	1	0	1	0	6.5	6.5	6.5	31.809	277	277	0.0021482	7.3127	By MS/MS	By matching	6.5	0	3549700	3549700	0	3549700	0	0	0	0				390	1543	TRUE	1612	3253	3098	3098
SPAC630.13c|tsc2|I|tuberin	SPAC630.13c|tsc2|I|tuberin	2	2	2	>SPAC630.13c|tsc2|I|tuberin	1	2	2	2	1	2	1	2	1	2	1.4	1.4	1.4	154.81	1339	1339	0	12.77	By MS/MS	By MS/MS	0.7	1.4	3921400	2917700	1003800	0	951670	2	1	3				391	3213;5300	True;True	3348;5547	6920;11770;11771	6637;11336;11337	6637;11336
SPAC630.14c|tup12|I|transcriptional	SPAC630.14c|tup12|I|transcriptional	1	1	1	>SPAC630.14c|tup12|I|transcriptional corepressor Tup12	1	1	1	1	0	1	0	1	0	1	2	2	2	65.56	598	598	0.0021413	7.2691	By matching	By MS/MS	0	2	0	0	0	0	0	0	1	1				392	6516	TRUE	6814	14305	13801	13801
SPAC631.02|bdf2|I|BET	SPAC631.02|bdf2|I|BET	2	2	2	>SPAC631.02|bdf2|I|BET family double bromodomain protein Bdf2	1	2	2	2	2	0	2	0	2	0	2.8	2.8	2.8	81.031	727	727	0	11.413	By MS/MS	By matching	2.8	0	6195000	6195000	0	6195000	0	2	0	2				393	4157;6134	True;True	4351;6424	9345;13524	9051;13021	9051;13021
SPAC637.04|ypp1|I|cargo-transport	SPAC637.04|ypp1|I|cargo-transport	1	1	1	>SPAC637.04|ypp1|I|cargo-transport protein Ypp1 (predicted)	1	1	1	1	1	1	1	1	1	1	1.5	1.5	1.5	98.306	862	862	0.0022222	7.6592	By MS/MS	By MS/MS	1.5	1.5	10941000	2732100	8208900	0	7782800	1	1	2				394	4744	TRUE	4970	10685;10686	10309;10310	10310
SPAC637.05c|vma2|I|V-type	SPAC637.05c|vma2|I|V-type	13	13	13	>SPAC637.05c|vma2|I|V-type ATPase V1 subunit B	1	13	13	13	8	12	8	12	8	12	32.4	32.4	32.4	55.841	503	503	0	99.805	By MS/MS	By MS/MS	20.1	30.2	71094000	21411000	49683000	27899000	40616000	7	10	17				395	2533;2653;2662;2901;3056;3061;4508;4701;4902;5270;5391;5460;6186	True;True;True;True;True;True;True;True;True;True;True;True;True	2633;2759;2768;3018;3185;3190;4725;4926;5138;5515;5642;5714;6478	5550;5776;5777;5791;6257;6258;6609;6610;6618;10118;10601;11004;11005;11709;11710;11942;12084;12085;13618;13619	5310;5520;5521;5532;5980;6338;6339;6347;9764;10233;10620;10621;11280;11281;11499;11636;11637;13112;13113	5310;5521;5532;5980;6339;6347;9764;10233;10621;11281;11499;11636;13113
SPAC637.07|moe1|I|translation	SPAC637.07|moe1|I|translation	3	3	3	>SPAC637.07|moe1|I|translation initiation factor eIF3d Moe1	1	3	3	3	3	3	3	3	3	3	6.9	6.9	6.9	62.636	567	567	0	16.348	By matching	By MS/MS	6.9	6.9	35851000	17764000	18087000	17360000	17552000	0	3	3				396	832;2269;5272	True;True;True	873;2361;5517	1782;1783;5047;5048;11713;11714	1707;4833;11284	1707;4833;11284
SPAC644.11c|pkp1|I|mitochondrial	SPAC644.11c|pkp1|I|mitochondrial	1	1	1	>SPAC644.11c|pkp1|I|mitochondrial pyruvate dehydrogenase (lipoamide) kinase Pkp1 (predicted)	1	1	1	1	1	1	1	1	1	1	3.1	3.1	3.1	48.187	425	425	0.004995	6.4138	By matching	By MS/MS	3.1	3.1	2659100	1196900	1462300	0	1386400	0	1	1				397	1492	TRUE	1560	3154;3155	3007	3007
SPBC18H10.14|rps1601|II|40S;SPAC664.04c|rps1602|I|40S	SPBC18H10.14|rps1601|II|40S;SPAC664.04c|rps1602|I|40S	7;7	7;7	7;7	>SPBC18H10.14|rps1601|II|40S ribosomal protein S16 (predicted);>SPAC664.04c|rps1602|I|40S ribosomal protein S16 (predicted)	2	7	7	7	6	7	6	7	6	7	50.7	50.7	50.7	15.395	140	140;140	0	54.864	By MS/MS	By MS/MS	40.7	50.7	224390000	103020000	121370000	101700000	116380000	6	6	12				398	255;316;1279;5527;6062;6146;6269	True;True;True;True;True;True;True	267;332;1339;5788;6348;6437;6562	613;614;744;745;2714;2715;12261;12262;13380;13381;13545;13776;13777	595;596;727;728;2574;2575;11810;12879;12880;13041;13265;13266	595;728;2575;11810;12879;13041;13266
SPAC664.05|rpl13|I|60S	SPAC664.05|rpl13|I|60S	6	6	6	>SPAC664.05|rpl13|I|60S ribosomal protein L13 (predicted)	1	6	6	6	5	5	5	5	5	5	43.8	43.8	43.8	23.529	208	208	0	42.674	By MS/MS	By MS/MS	26	37.5	62214000	21978000	40236000	24923000	35202000	4	5	9				399	1713;2298;2874;4035;5771;6276	True;True;True;True;True;True	1787;2390;2990;4227;6047;6569	3705;3706;5096;5097;6200;9121;9122;12793;13790;13791	3567;3568;4877;4878;5929;8839;8840;12322;13279;13280	3567;4878;5929;8840;12322;13279
SPAC664.11|ssc1|I|mitochondrial	SPAC664.11|ssc1|I|mitochondrial	18	18	18	>SPAC664.11|ssc1|I|mitochondrial heat shock protein Hsp70	1	18	18	18	16	18	16	18	16	18	33.8	33.8	33.8	72.976	674	674	0	130.22	By MS/MS	By MS/MS	31.8	33.8	503360000	255230000	248140000	257200000	233290000	16	15	31				400	12;108;713;2132;2140;2778;3131;3307;3999;4388;5219;5261;5350;5663;5719;6057;6241;6242	True;True;True;True;True;True;True;True;True;True;True;True;True;True;True;True;True;True	12;114;748;2221;2230;2890;3262;3445;4188;4600;5463;5506;5599;5935;5994;6343;6534;6535	22;23;222;223;1550;1551;4726;4727;4746;4747;6010;6750;7095;7096;9017;9018;9865;9866;11606;11607;11688;11689;11864;11865;12578;12579;12691;12692;13373;13374;13726;13727;13728;13729	21;22;211;212;1487;4547;4548;4549;4565;5745;6473;6811;6812;8740;8741;9545;9546;11185;11186;11261;11262;11422;11423;12119;12120;12229;12230;12873;13219;13220;13221;13222	22;212;1487;4548;4565;5745;6473;6812;8740;9545;11186;11262;11422;12119;12230;12873;13220;13222
SPAC688.11|end4|I|Huntingtin-interacting	SPAC688.11|end4|I|Huntingtin-interacting	2	2	2	>SPAC688.11|end4|I|Huntingtin-interacting protein homolog	1	2	2	2	1	1	1	1	1	1	1.5	1.5	1.5	124.37	1102	1102	0	11.148	By MS/MS	By MS/MS	0.9	0.6	3067700	1161400	1906400	1161400	0	1	1	2				401	315;5152	True;True	331;5395	743;11482	726;11070	726;11070
SPAC694.02|SPAC694.02|I|DEAD/DEAH	SPAC694.02|SPAC694.02|I|DEAD/DEAH	29	29	29	>SPAC694.02|SPAC694.02|I|DEAD/DEAH box helicase	1	29	29	29	27	24	27	24	27	24	19.7	19.7	19.7	195.06	1717	1717	0	233.12	By MS/MS	By MS/MS	17.7	16.8	298540000	148630000	149920000	134890000	154350000	23	19	42				402	20;358;828;948;1043;1177;1202;1521;1606;1699;2244;2265;2307;2690;2892;2914;3070;3547;3737;4389;4479;4592;4707;4999;5390;5695;5708;5735;5811	True;True;True;True;True;True;True;True;True;True;True;True;True;True;True;True;True;True;True;True;True;True;True;True;True;True;True;True;True	20;374;869;995;1096;1234;1260;1589;1676;1772;2335;2357;2399;2798;3009;3032;3199;3691;3884;4601;4695;4813;4932;5238;5641;5970;5983;6010;6089	37;38;821;822;1774;1775;2021;2022;2220;2221;2500;2501;2554;2555;3210;3211;3488;3489;3675;3676;4998;4999;5041;5113;5114;5852;5853;6236;6237;6288;6289;6290;6634;7551;7552;7911;9867;9868;10050;10303;10614;10615;11196;11197;11940;11941;12644;12669;12670;12722;12723;12884;12885	35;36;795;796;1700;1701;1932;1933;2123;2124;2387;2388;2430;2431;3059;3357;3358;3537;3538;4790;4791;4828;4894;4895;5592;5962;6018;6019;6360;7235;7236;7566;9547;9707;9934;10243;10801;10802;11497;11498;12183;12208;12209;12258;12259;12408;12409	36;795;1700;1933;2124;2388;2431;3059;3357;3537;4790;4828;4894;5592;5962;6018;6360;7235;7566;9547;9707;9934;10243;10802;11498;12183;12209;12259;12409
SPBC3D6.15|rps2501|II|40S;SPAC694.05c|rps2502|I|40S	SPBC3D6.15|rps2501|II|40S;SPAC694.05c|rps2502|I|40S	1;1	1;1	1;1	>SPBC3D6.15|rps2501|II|40S ribosomal protein S25 (predicted);>SPAC694.05c|rps2502|I|40S ribosomal protein S25 (predicted)	2	1	1	1	1	1	1	1	1	1	11.4	11.4	11.4	9.8194	88	88;89	0.0021075	7.1041	By MS/MS	By MS/MS	11.4	11.4	19280000	9299400	9980100	0	9462000	1	1	2				403	1414	TRUE	1480	3011;3012	2868;2869	2868
SPAC6B12.04c|SPAC6B12.04c|I|2-aminoadipate	SPAC6B12.04c|SPAC6B12.04c|I|2-aminoadipate	5	5	5	>SPAC6B12.04c|SPAC6B12.04c|I|2-aminoadipate transaminase (predicted)	1	5	5	5	5	2	5	2	5	2	12.1	12.1	12.1	47.569	421	421	0	31.068	By MS/MS	By MS/MS	12.1	4.8	7220900	5017000	2203900	5017000	0	5	1	6				404	342;3082;3627;5385;5913	True;True;True;True;True	358;3212;3771;5636;6194	794;6659;7699;7700;11930;13081;13082	774;6386;7365;7366;11486;12596	774;6386;7365;11486;12596
SPAC6B12.06c|rrg9|I|mitochondrial	SPAC6B12.06c|rrg9|I|mitochondrial	1	1	1	>SPAC6B12.06c|rrg9|I|mitochondrial genome maintenance protein Rrg9 (predicted)	1	1	1	1	1	1	1	1	1	1	10.3	10.3	10.3	13.827	117	117	0.0021119	7.143	By MS/MS	By MS/MS	10.3	10.3	643390000	283760000	359630000	0	340960000	1	1	2				405	3928	TRUE	4104	8597;8598	8254;8255	8254	149	1
SPAC6B12.07c|SPAC6B12.07c|I|ubiquitin-protein	SPAC6B12.07c|SPAC6B12.07c|I|ubiquitin-protein	4	4	4	>SPAC6B12.07c|SPAC6B12.07c|I|ubiquitin-protein ligase E3 (predicted)	1	4	4	4	2	4	2	4	2	4	8.5	8.5	8.5	53.403	470	470	0	28.348	By MS/MS	By MS/MS	4	8.5	16814000	3995500	12818000	7090400	9057600	1	3	4				406	978;1440;3208;3730	True;True;True;True	1026;1506;3343;3877	2081;3058;3059;6912;6913;7898	1993;2916;6629;6630;7552	1993;2916;6629;7552
SPAC6B12.10c|spp1|I|DNA	SPAC6B12.10c|spp1|I|DNA	1	1	1	>SPAC6B12.10c|spp1|I|DNA primase catalytic subunit Spp1	1	1	1	1	0	1	0	1	0	1	2.9	2.9	2.9	52.009	454	454	0.0058997	6.3008	By matching	By MS/MS	0	2.9	2310200	0	2310200	0	2190300	0	1	1				407	952	TRUE	999	2029	1939	1939
SPAC6B12.12|tom70|I|mitochondrial	SPAC6B12.12|tom70|I|mitochondrial	5	5	5	>SPAC6B12.12|tom70|I|mitochondrial TOM complex subunit Tom70 (predicted)	1	5	5	5	3	4	3	4	3	4	12	12	12	69.516	625	625	0	32.597	By MS/MS	By MS/MS	7.7	9.4	12630000	4651300	7978900	0	7564700	2	2	4				408	260;275;3537;4026;4926	True;True;True;True;True	273;288;3681;4218;5164	627;657;7532;9100;9101;11051;11052	609;641;7220;8820;10664	609;641;7220;8820;10664
SPAC6B12.14c|SPAC6B12.14c|I|conserved	SPAC6B12.14c|SPAC6B12.14c|I|conserved	3	3	3	>SPAC6B12.14c|SPAC6B12.14c|I|conserved fungal protein	1	3	3	3	3	2	3	2	3	2	20.8	20.8	20.8	17.397	154	154	0	23.683	By MS/MS	By MS/MS	20.8	11.7	8718700	4236000	4482700	4158100	4234900	3	1	4				409	189;4011;6266	True;True;True	199;4201;6559	488;489;490;9045;13771;13772	477;478;8766;13261	477;8766;13261
SPAC6B12.15|cpc2|I|RACK1	SPAC6B12.15|cpc2|I|RACK1	14	14	14	>SPAC6B12.15|cpc2|I|RACK1 ortholog Cpc2	1	14	14	14	14	14	14	14	14	14	50	50	50	34.851	314	314	0	207.18	By MS/MS	By MS/MS	50	50	796680000	372750000	423930000	387130000	387550000	12	14	26				410	376;473;632;670;718;2399;2400;2818;4337;4950;4951;5622;5805;6259	True;True;True;True;True;True;True;True;True;True;True;True;True;True	393;493;663;702;703;753;2494;2495;2931;4547;5188;5189;5889;6083;6552	855;856;1058;1059;1380;1381;1470;1471;1472;1558;1559;5291;5292;5293;5294;6084;6085;9762;9763;11105;11106;11107;11108;12495;12496;12871;12872;13758;13759	828;829;1021;1022;1023;1333;1334;1418;1419;1420;1494;1495;5055;5056;5057;5058;5819;5820;9452;9453;10712;10713;10714;10715;12037;12038;12396;12397;13248;13249	829;1023;1333;1419;1494;5056;5058;5819;9453;10713;10714;12038;12397;13249	150	217
SPAC6C3.04|cit1|I|citrate	SPAC6C3.04|cit1|I|citrate	3	3	3	>SPAC6C3.04|cit1|I|citrate synthase Cit1	1	3	3	3	3	2	3	2	3	2	8.3	8.3	8.3	54.16	483	483	0	18.991	By MS/MS	By MS/MS	8.3	6.2	12584000	6595100	5989400	6797300	5476200	3	2	5				411	95;301;4872	True;True;True	101;315;5107	199;200;708;10947;10948	189;190;693;10566;10567	190;693;10567
SPAC6F12.08c|exo84|I|exocyst	SPAC6F12.08c|exo84|I|exocyst	6	6	6	>SPAC6F12.08c|exo84|I|exocyst complex subunit Exo84 (predicted)	1	6	6	6	5	5	5	5	5	5	13	13	13	68.592	584	584	0	41.834	By MS/MS	By MS/MS	10.3	11.8	36927000	15450000	21477000	14876000	20937000	6	3	9				412	2105;3180;3471;4123;5084;5161	True;True;True;True;True;True	2194;3314;3611;4316;5324;5404	4672;4673;6860;7401;7402;9279;9280;11351;11352;11501	4496;4497;6582;7095;8988;8989;8990;10944;10945;10946;11089	4497;6582;7095;8988;10945;11089
SPAC6F12.10c|ade3|I|phosphoribosylformylglycinamidine	SPAC6F12.10c|ade3|I|phosphoribosylformylglycinamidine	10	10	10	>SPAC6F12.10c|ade3|I|phosphoribosylformylglycinamidine synthase Ade3 (predicted)	1	10	10	10	7	9	7	9	7	9	9.8	9.8	9.8	144.86	1323	1323	0	69.339	By MS/MS	By MS/MS	6.8	8.8	38423000	16064000	22359000	17709000	19554000	4	6	10				413	984;1425;2016;3279;4032;4503;4855;5579;5734;6033	True;True;True;True;True;True;True;True;True;True	1032;1491;2102;3416;4224;4720;5090;5843;6009;6317	2090;2091;3031;4480;7042;7043;9114;9115;10107;10108;10918;12390;12391;12721;13325;13326	2002;2003;2887;4316;6755;6756;8833;8834;9757;10540;11936;11937;12257;12830	2003;2887;4316;6755;8834;9757;10540;11936;12257;12830
SPAC6F12.11c|sfc1|I|transcription	SPAC6F12.11c|sfc1|I|transcription	1	1	1	>SPAC6F12.11c|sfc1|I|transcription factor TFIIIC complex A box associated subunit Sfc1	1	1	1	1	0	1	0	1	0	1	2.2	2.2	2.2	52.744	456	456	0.0021299	7.2305	By matching	By MS/MS	0	2.2	7768200	0	7768200	0	7364900	0	1	1				414	1538	TRUE	1607	3245	3090	3090
SPAC6F12.13c|fps1|I|geranyltranstransferase	SPAC6F12.13c|fps1|I|geranyltranstransferase	2	2	2	>SPAC6F12.13c|fps1|I|geranyltranstransferase Fps1	1	2	2	2	1	2	1	2	1	2	5.2	5.2	5.2	39.516	347	347	0	12.187	By MS/MS	By MS/MS	2.6	5.2	8329800	1330300	6999500	0	6636200	1	2	3				415	500;4937	True;True	521;5175	1108;11074;11075	1070;10684;10685	1070;10685
SPAC6F12.15c|cut9|I|anaphase-promoting	SPAC6F12.15c|cut9|I|anaphase-promoting	4	4	4	>SPAC6F12.15c|cut9|I|anaphase-promoting complex, TPR lobe subcomplex subunit Cut9/Apc6	1	4	4	4	3	4	3	4	3	4	6.1	6.1	6.1	75.888	671	671	0	25.393	By MS/MS	By MS/MS	4.2	6.1	12528000	4522500	8005600	0	7590000	3	4	7				416	88;1401;3429;6511	True;True;True;True	93;1466;3568;6809	187;2986;2987;7319;7320;14297;14298	178;2844;2845;7020;7021;13793;13794	178;2845;7021;13794
SPAC6F6.03c|nog2|I|ribosome	SPAC6F6.03c|nog2|I|ribosome	2	2	2	>SPAC6F6.03c|nog2|I|ribosome export GTPase Nog2 (predicted)	1	2	2	2	2	2	2	2	2	2	3.5	3.5	3.5	59.913	537	537	0	13.649	By MS/MS	By MS/MS	3.5	3.5	5150700	2956500	2194200	0	2080300	2	2	4				417	1916;2706	True;True	2000;2818	4279;4280;5892;5893	4134;4135;5633;5634	4135;5634
SPAC6F6.07c|rps13|I|40S	SPAC6F6.07c|rps13|I|40S	9	9	9	>SPAC6F6.07c|rps13|I|40S ribosomal protein S13	1	9	9	9	9	8	9	8	9	8	57	57	57	16.953	151	151	0	69.045	By MS/MS	By MS/MS	57	51	267810000	119050000	148760000	120330000	134060000	10	12	22				418	50;374;804;1761;1859;2881;3317;5113;5873	True;True;True;True;True;True;True;True;True	51;391;842;1835;1937;1938;2997;3455;5353;6153	98;99;851;852;1727;3841;3842;4170;4171;4172;6214;6215;7112;7113;11407;11408;13006;13007;13008;13009	91;92;824;825;1657;3698;3699;3700;4017;4018;4019;5942;5943;6827;6828;10998;10999;12521;12522;12523;12524;12525	91;825;1657;3698;4017;5943;6828;10998;12522	151	45
SPAC6F6.10c|arc2|I|ARP2/3	SPAC6F6.10c|arc2|I|ARP2/3	6	6	6	>SPAC6F6.10c|arc2|I|ARP2/3 actin-organizing complex subunit Arc34	1	6	6	6	6	5	6	5	6	5	18.6	18.6	18.6	36.974	317	317	0	46.499	By MS/MS	By MS/MS	18.6	13.9	58755000	34070000	24685000	33141000	24332000	5	5	10				419	2558;4265;4294;4364;4691;5860	True;True;True;True;True;True	2659;4471;4500;4575;4916;6140	5595;5596;9584;9585;9641;9642;9812;9813;10584;12982;12983	5351;5352;9275;9276;9326;9327;9499;9500;10216;12499;12500	5352;9275;9327;9500;10216;12500
SPAC6F6.11c|SPAC6F6.11c|I|pyridoxine-pyridoxal-pyridoxamine	SPAC6F6.11c|SPAC6F6.11c|I|pyridoxine-pyridoxal-pyridoxamine	1	1	1	>SPAC6F6.11c|SPAC6F6.11c|I|pyridoxine-pyridoxal-pyridoxamine kinase (predicted)	1	1	1	1	1	1	1	1	1	1	4.5	4.5	4.5	33.998	309	309	0.0021834	7.4894	By matching	By MS/MS	4.5	4.5	4212800	2065400	2147400	0	2035900	0	1	1				420	4844	TRUE	5079	10897;10898	10523	10523
SPAC6F6.12|atg24|I|autophagy	SPAC6F6.12|atg24|I|autophagy	1	1	1	>SPAC6F6.12|atg24|I|autophagy associated protein Atg24 (predicted)	1	1	1	1	1	1	1	1	1	1	3.5	3.5	3.5	46.376	401	401	0.0022026	7.6214	By MS/MS	By MS/MS	3.5	3.5	3461400	3461400	0	3461400	0	1	1	2				421	3106	TRUE	3237	6704;6705	6430;6431	6431
SPAC6G10.02c|tea3|I|cell	SPAC6G10.02c|tea3|I|cell	20	20	20	>SPAC6G10.02c|tea3|I|cell end marker Tea3	1	20	20	20	15	19	15	19	15	19	21.7	21.7	21.7	127.75	1125	1125	0	196.81	By MS/MS	By MS/MS	16.7	20.1	245520000	103180000	142340000	117380000	120750000	12	19	31				422	215;292;565;979;1164;1180;1468;2255;2381;2740;3465;3616;3617;3823;4188;4257;4481;4894;5646;6538	True;True;True;True;True;True;True;True;True;True;True;True;True;True;True;True;True;True;True;True	226;305;589;1027;1221;1237;1535;2347;2476;2852;3605;3760;3761;3972;4386;4463;4697;5130;5916;6838	538;689;690;1231;2082;2476;2477;2505;3113;5021;5022;5260;5261;5946;5947;7390;7391;7680;7681;7682;8099;8100;9405;9406;9567;9568;10053;10054;10990;10991;12538;12539;14350;14351;14352	525;674;675;1182;1994;2366;2367;2391;2968;4812;4813;5029;5030;5686;5687;7084;7085;7348;7349;7742;7743;9108;9109;9261;9262;9710;9711;10609;12079;12080;13845;13846;13847	525;675;1182;1994;2367;2391;2968;4812;5030;5686;7084;7348;7349;7743;9108;9262;9710;10609;12080;13847
SPAC6G10.03c|cld1|I|mitochondrial	SPAC6G10.03c|cld1|I|mitochondrial	4	4	4	>SPAC6G10.03c|cld1|I|mitochondrial cardiolipin-specific phospholipase Cld1 (predicted)	1	4	4	4	4	4	4	4	4	4	9.1	9.1	9.1	48.72	428	428	0	26.488	By MS/MS	By MS/MS	9.1	9.1	20516000	9320900	11195000	9760200	10175000	4	3	7				423	306;1239;1352;3488	True;True;True;True	320;1298;1414;3630	717;718;2633;2634;2863;2864;7435;7436	702;703;2498;2499;2721;2722;7127;7128	702;2498;2721;7127
SPAC6G10.04c|pre5|I|20S	SPAC6G10.04c|pre5|I|20S	1	1	1	>SPAC6G10.04c|pre5|I|20S proteasome complex subunit alpha 6 subunit Pre5 (predicted)	1	1	1	1	0	1	0	1	0	1	3.7	3.7	3.7	30.11	272	272	0.0031056	6.9058	By matching	By MS/MS	0	3.7	0	0	0	0	0	0	1	1				424	5434	TRUE	5688	12031	11588	11588
SPAC6G10.05c|trs120|I|TRAPP	SPAC6G10.05c|trs120|I|TRAPP	11	11	11	>SPAC6G10.05c|trs120|I|TRAPP complex subunit Trs120 (predicted)	1	11	11	11	6	10	6	10	6	10	10.5	10.5	10.5	137.76	1210	1210	0	72.581	By MS/MS	By MS/MS	5.6	9.7	44564000	13476000	31088000	20262000	22687000	4	7	11				425	409;1123;1405;1880;3491;4781;4870;4988;5010;5177;6374	True;True;True;True;True;True;True;True;True;True;True	428;1178;1470;1961;3633;5009;5105;5227;5249;5420;6669	920;921;2393;2394;2994;2995;4215;7441;10765;10943;10944;11179;11215;11216;11530;13989	888;889;2288;2289;2852;2853;4071;7132;10392;10563;10785;10819;10820;11116;13471	889;2289;2853;4071;7132;10392;10563;10785;10820;11116;13471
SPAC6G10.08|idp1|I|isocitrate	SPAC6G10.08|idp1|I|isocitrate	12	12	12	>SPAC6G10.08|idp1|I|isocitrate dehydrogenase Idp1 (predicted)	1	12	12	12	10	12	10	12	10	12	31	31	31	49.478	439	439	0	79.336	By MS/MS	By MS/MS	26.2	31	97277000	41556000	55722000	47829000	46555000	6	11	17				426	563;1421;2034;2264;3138;3150;3295;5112;5192;5384;5636;6503	True;True;True;True;True;True;True;True;True;True;True;True	587;1487;2121;2356;3269;3281;3432;5352;5435;5635;5906;6801	1229;3024;3025;4525;4526;5039;5040;6762;6782;6783;7073;7074;11405;11406;11554;11555;11927;11928;11929;12524;12525;14282;14283	1180;2881;2882;4357;4358;4826;4827;6484;6501;6502;6791;6792;10997;11138;11483;11484;11485;12067;13780	1180;2881;4357;4827;6484;6502;6791;10997;11138;11485;12067;13780
SPAC6G9.06c|pcp1|I|pericentrin	SPAC6G9.06c|pcp1|I|pericentrin	2	2	2	>SPAC6G9.06c|pcp1|I|pericentrin Pcp1	1	2	2	2	1	2	1	2	1	2	2.5	2.5	2.5	140.76	1208	1208	0	11.848	By MS/MS	By MS/MS	0.8	2.5	7397200	2643900	4753300	0	4506500	2	0	2				427	5017;5092	True;True	5256;5332	11228;11229;11365	10831;10832;10958	10832;10958
SPCC330.14c|rpl2402|III|60S;SPAC6G9.09c|rpl2401|I|60S	SPCC330.14c|rpl2402|III|60S;SPAC6G9.09c|rpl2401|I|60S	3;3	3;3	3;3	>SPCC330.14c|rpl2402|III|60S ribosomal protein L24 (predicted);>SPAC6G9.09c|rpl2401|I|60S ribosomal protein L24 (predicted)	2	3	3	3	3	3	3	3	3	3	18.1	18.1	18.1	16.912	149	149;149	0	21.97	By MS/MS	By MS/MS	18.1	18.1	45743000	20247000	25497000	19325000	25094000	3	2	5				428	1802;3682;4829	True;True;True	1878;3828;5063	4059;4060;7805;7806;10869;10870	3913;3914;7462;7463;10497;10498	3913;7463;10498
SPAC6G9.14|puf4|I|pumilio	SPAC6G9.14|puf4|I|pumilio	2	2	2	>SPAC6G9.14|puf4|I|pumilio family RNA-binding protein Puf4 (predicted)	1	2	2	2	2	2	2	2	2	2	3.7	3.7	3.7	73.291	681	681	0	11.359	By MS/MS	By MS/MS	3.7	3.7	21315000	8074600	13241000	8083400	12545000	1	2	3				429	581;4696	True;True	605;4921	1261;1262;10592;10593	1210;1211;10223;10224	1211;10223
SPAC767.01c|vps1|I|dynamin;SPBC12C2.08|dnm1|II|mitochondrial	SPAC767.01c|vps1|I|dynamin	28;1	28;1	28;1	>SPAC767.01c|vps1|I|dynamin family protein Vps1	2	28	28	28	24	28	24	28	24	28	50.9	50.9	50.9	75.79	678	678;781	0	261.31	By MS/MS	By MS/MS	42.3	50.9	1228100000	393880000	834180000	404800000	751720000	24	32	56				430	594;1219;1936;2275;2285;2574;2575;2619;2832;3015;3273;3409;3445;4012;4028;4183;4289;4679;4681;4726;4811;5181;5462;5501;5816;6231;6582;6585	True;True;True;True;True;True;True;True;True;True;True;True;True;True;True;True;True;True;True;True;True;True;True;True;True;True;True;True	619;1277;2022;2367;2377;2677;2678;2724;2945;3142;3410;3548;3585;4202;4220;4381;4495;4904;4906;4951;5044;5424;5716;5761;5762;6094;6095;6524;6885;6888	1284;1285;2589;2590;4322;4323;5056;5074;5075;5629;5630;5631;5632;5715;5716;6110;6111;6520;6521;6522;6523;6524;7032;7033;7279;7280;7281;7282;7349;7350;9046;9047;9104;9105;9106;9107;9397;9398;9631;9632;10560;10562;10652;10833;10834;11535;11536;12103;12104;12199;12200;12201;12895;12896;12897;12898;13708;13709;14442;14443;14444;14445;14449;14450	1231;1232;2460;4172;4173;4839;4840;4856;4857;5381;5382;5383;5384;5462;5463;5842;5843;6249;6250;6251;6252;6253;6745;6746;6984;6985;7048;7049;8767;8768;8823;8824;8825;8826;8827;9102;9103;9317;9318;10194;10196;10278;10460;10461;11120;11121;11656;11657;11748;11749;11750;12417;12418;12419;13204;13205;13934;13935;13936;13940	1231;2460;4172;4839;4857;5382;5383;5463;5843;6250;6745;6985;7049;8768;8826;9102;9318;10194;10196;10278;10460;11121;11657;11748;12417;13205;13935;13940	152;153;154	227;600;613
SPAC7D4.02c|sfp47|I|Ubp4	SPAC7D4.02c|sfp47|I|Ubp4	1	1	1	>SPAC7D4.02c|sfp47|I|Ubp4 interactor Sfp47	1	1	1	1	0	1	0	1	0	1	3.6	3.6	3.6	46.782	415	415	0.0040282	6.4983	By matching	By MS/MS	0	3.6	3604900	0	3604900	0	3417800	0	1	1				431	3658	TRUE	3804	7762	7422	7422
SPAC7D4.04|atg11|I|autophagy	SPAC7D4.04|atg11|I|autophagy	2	2	2	>SPAC7D4.04|atg11|I|autophagy protein Atg11	1	2	2	2	2	1	2	1	2	1	4.2	4.2	4.2	106.77	926	926	0	18.641	By MS/MS	By MS/MS	4.2	2.6	8430700	5354400	3076300	5354400	0	2	1	3				432	5237;6168	True;True	5481;6460	11643;13584;13585	11219;13077;13078	11219;13077
SPAC7D4.07c|trx1|I|cytosolic	SPAC7D4.07c|trx1|I|cytosolic	4	4	4	>SPAC7D4.07c|trx1|I|cytosolic thioredoxin Trx1	1	4	4	4	4	4	4	4	4	4	58.3	58.3	58.3	11.297	103	103	0	95.275	By MS/MS	By MS/MS	58.3	58.3	192490000	121980000	70514000	118710000	70123000	4	2	6				433	1337;2369;4628;5823	True;True;True;True	1397;2464;4851;6102	2832;2833;5239;5240;10456;10457;12911;12912	2692;2693;5009;10097;12431;12432	2693;5009;10097;12431
SPAC7D4.10|vma13|I|V-type	SPAC7D4.10|vma13|I|V-type	2	2	2	>SPAC7D4.10|vma13|I|V-type ATPase V1 subunit H (predicted)	1	2	2	2	1	2	1	2	1	2	4.2	4.2	4.2	51.436	450	450	0	13.417	By MS/MS	By MS/MS	1.6	4.2	5525300	1021200	4504100	0	4270200	1	1	2				434	3472;3780	True;True	3612;3928	7403;7404;8004	7096;7655	7096;7655
SPAC806.02c|SPAC806.02c|I|Par	SPAC806.02c|SPAC806.02c|I|Par	1	1	1	>SPAC806.02c|SPAC806.02c|I|Par A family ATPase/WD repeat iron cluster assembly fusion protein (predicted)	1	1	1	1	1	1	1	1	1	1	2.3	2.3	2.3	67.68	608	608	0.0022002	7.601	By MS/MS	By MS/MS	2.3	2.3	3391200	1887300	1503900	0	1425800	1	1	2				435	2915	TRUE	3033	6291;6292	6020;6021	6020
SPAC821.05|tif38|I|translation	SPAC821.05|tif38|I|translation	3	3	3	>SPAC821.05|tif38|I|translation initiation factor eIF3h (p40)	1	3	3	3	3	3	3	3	3	3	12	12	12	39.78	357	357	0	22.481	By MS/MS	By MS/MS	12	12	46066000	22970000	23095000	19326000	18105000	4	3	7				436	6;554;3373	True;True;True	6;578;3511;3512	10;11;1212;1213;7213;7214;7215;7216	8;9;1166;1167;6921;6922;6923	9;1166;6923	155	332
SPAC821.06|spn2|I|mitotic	SPAC821.06|spn2|I|mitotic	2	2	2	>SPAC821.06|spn2|I|mitotic and meiotic (sporulation) septin Spn2	1	2	2	2	2	2	2	2	2	2	7.9	7.9	7.9	38.129	331	331	0	14.532	By MS/MS	By MS/MS	7.9	7.9	7336400	3586000	3750400	0	3555700	0	0	0				437	3700;4601	True;True	3846;4823	7838;7839;10322;10323	7494;7495;9952	7495;9952
SPAC821.10c|sod1|I|superoxide	SPAC821.10c|sod1|I|superoxide	1	1	1	>SPAC821.10c|sod1|I|superoxide dismutase Sod1	1	1	1	1	1	1	1	1	1	1	11	11	11	15.912	154	154	0.0030896	6.838	By MS/MS	By matching	11	11	6291600	3398300	2893300	0	2743100	1	0	1				438	2231	TRUE	2322	4971;4972	4768	4768
SPAC821.11|pro1|I|gamma-glutamyl	SPAC821.11|pro1|I|gamma-glutamyl	10	10	10	>SPAC821.11|pro1|I|gamma-glutamyl phosphate reductase Pro1 (predicted)	1	10	10	10	10	10	10	10	10	10	23.3	23.3	23.3	48.706	451	451	0	75.403	By MS/MS	By MS/MS	23.3	23.3	107030000	33622000	73404000	39082000	64134000	9	8	17				439	950;1885;2215;2220;3107;4833;4983;5034;6097;6472	True;True;True;True;True;True;True;True;True;True	997;1967;2306;2311;3238;5067;5222;5274;6387;6770	2025;2026;4222;4223;4937;4938;4939;4940;4949;4950;6706;6707;10876;10877;11171;11172;11261;11262;13454;13455;14237;14238	1935;1936;4078;4079;4740;4741;4742;4751;6432;6433;10504;10505;10777;10778;10862;10863;12953;13737;13738	1936;4079;4741;4751;6433;10505;10777;10863;12953;13738
SPAC823.03|ppk15|I|serine/threonine	SPAC823.03|ppk15|I|serine/threonine	6	6	6	>SPAC823.03|ppk15|I|serine/threonine protein kinase Ppk15 (predicted)	1	6	6	6	6	6	6	6	6	6	14.4	14.4	14.4	61.49	534	534	0	45.32	By MS/MS	By MS/MS	14.4	14.4	54582000	26040000	28542000	24987000	28113000	4	8	12				440	2248;3089;4425;4834;4925;5504	True;True;True;True;True;True	2339;3220;4639;5068;5163;5765	5005;5006;6673;6674;9942;9943;9944;10878;10879;11049;11050;12207;12208;12209	4796;4797;6398;6399;6400;9610;9611;10506;10507;10662;10663;11756;11757;11758	4797;6400;9610;10507;10663;11757
SPAC823.08c|rrp3|I|ATP-dependent	SPAC823.08c|rrp3|I|ATP-dependent	2	2	2	>SPAC823.08c|rrp3|I|ATP-dependent RNA helicase Rrp3 (predicted)	1	2	2	2	1	2	1	2	1	2	6	6	6	51.863	465	465	0	11.216	By MS/MS	By MS/MS	3.9	6	8665800	2383000	6282800	0	5956600	1	1	2				441	1565;5516	True;True	1635;5777	3293;12235;12236	3135;11782	3135;11782
SPAC824.05|vps16|I|HOPS/CORVET	SPAC824.05|vps16|I|HOPS/CORVET	2	2	2	>SPAC824.05|vps16|I|HOPS/CORVET complex subunit Vps16 (predicted)	1	2	2	2	1	2	1	2	1	2	2.4	2.4	2.4	95.188	835	835	0	12.359	By MS/MS	By MS/MS	1.1	2.4	1130200	372790	757390	0	718070	0	1	1				442	3334;4904	True;True	3472;5140	7142;7143;11010	6855;6856;10625	6856;10625
SPAC869.02c|yhb1|I|nitric	SPAC869.02c|yhb1|I|nitric	8	8	8	>SPAC869.02c|yhb1|I|nitric oxide dioxygenase Yhb1	1	8	8	8	8	3	8	3	8	3	24.1	24.1	24.1	48.459	427	427	0	53.776	By MS/MS	By MS/MS	24.1	8.2	44942000	40610000	4332200	34128000	10589000	7	2	9				443	206;2233;2522;2710;4078;4380;4632;5879	True;True;True;True;True;True;True;True	216;2324;2622;2822;4271;4592;4855;6159	516;4975;4976;5531;5532;5900;9201;9850;10464;13019;13020	505;4771;4772;5290;5291;5643;8916;9529;10104;12534	505;4771;5290;5643;8916;9529;10104;12534
SPAC890.02c|alp7|I|centrosomal	SPAC890.02c|alp7|I|centrosomal	20	20	20	>SPAC890.02c|alp7|I|centrosomal transforming acidic coiled-coil (TACC) protein ortholog Alp7	1	20	20	20	13	20	13	20	13	20	53.2	53.2	53.2	53.175	474	474	0	198.26	By MS/MS	By MS/MS	39.2	53.2	418000000	145450000	272550000	142180000	247690000	9	22	31				444	1808;2724;2725;2998;3041;3430;3576;3577;3731;3761;4231;4350;4399;4598;4712;4789;4835;5731;6415;6639	True;True;True;True;True;True;True;True;True;True;True;True;True;True;True;True;True;True;True;True	1884;2836;2837;3120;3170;3569;3720;3721;3878;3908;4434;4561;4612;4613;4820;4937;5017;5018;5069;6006;6710;6943	4070;5922;5923;6475;6476;6578;6579;7321;7322;7604;7605;7606;7607;7899;7900;7953;7954;7955;7956;9510;9788;9887;9888;9889;9890;10316;10625;10626;10782;10783;10880;10881;12714;12715;12716;12717;14125;14126;14570;14571	3923;5664;5665;6209;6210;6305;7022;7023;7285;7286;7287;7288;7553;7554;7555;7606;7607;7608;9208;9476;9565;9566;9947;10252;10407;10408;10508;12252;12253;12254;13634;13635;14059	3923;5664;5665;6209;6305;7023;7285;7288;7553;7608;9208;9476;9566;9947;10252;10408;10508;12253;13634;14059	156;157	401;420
SPAC890.07c|rmt1|I|type	SPAC890.07c|rmt1|I|type	1	1	1	>SPAC890.07c|rmt1|I|type I protein arginine N-methyltransferase Rmt1	1	1	1	1	1	0	1	0	1	0	3.5	3.5	3.5	39.018	340	340	0.0049801	6.398	By MS/MS	By matching	3.5	0	815750	815750	0	815750	0	1	0	1				445	6515	TRUE	6813	14304	13800	13800
SPAC890.08|rpl31|I|60S	SPAC890.08|rpl31|I|60S	5	5	5	>SPAC890.08|rpl31|I|60S ribosomal protein L31 (predicted)	1	5	5	5	5	5	5	5	5	5	46.9	46.9	46.9	13.261	113	113	0	40.16	By MS/MS	By MS/MS	46.9	46.9	123770000	60293000	63479000	62942000	57535000	4	5	9				446	877;1048;3841;4748;4778	True;True;True;True;True	922;1101;3990;4974;5006	1872;1873;1874;2228;2229;8133;8134;10693;10694;10758;10759	1789;1790;2131;2132;7773;7774;10317;10318;10385;10386	1790;2132;7774;10318;10385
SPAC8C9.08|rps5|I|40S	SPAC8C9.08|rps5|I|40S	10	1	1	>SPAC8C9.08|rps5|I|40S ribosomal protein S5 (predicted)	1	10	1	1	9	10	0	1	0	1	63.5	8.9	8.9	22.224	203	203	0.0023557	9.0342	By matching	By MS/MS	54.7	63.5	0	0	0	0	0	0	1	1				447	482;700;1498;2033;3198;3722;4386;4721;4964;6080	True;False;False;False;False;False;False;False;False;False	503;735;1566;2120;3333;3868;3869;4598;4946;5202;6370	1077;1527;1528;1529;1530;3166;3167;4523;4524;6895;6896;7883;7884;7885;7886;9860;9861;10641;10642;10643;11129;11130;13421;13422	1040;1468;1469;1470;1471;3018;3019;3020;4355;4356;6615;6616;7538;7539;7540;9539;9540;10267;10268;10269;10738;10739;12920;12921	1040;1470;3018;4355;6615;7538;9540;10268;10739;12921	113;114	76;77
SPAC8C9.14|prr1|I|transcription	SPAC8C9.14|prr1|I|transcription	24	24	24	>SPAC8C9.14|prr1|I|transcription factor Prr1	1	24	24	24	21	22	21	22	21	22	62.5	62.5	62.5	60.045	539	539	0	323.31	By MS/MS	By MS/MS	55.8	58.4	1233400000	628720000	604670000	570230000	538950000	24	25	49				448	445;628;741;745;1473;1901;2049;2059;2060;2211;2567;2568;2924;3199;3717;4116;4162;4356;4381;4519;4527;4568;4869;6348	True;True;True;True;True;True;True;True;True;True;True;True;True;True;True;True;True;True;True;True;True;True;True;True	464;465;659;776;780;1540;1984;2136;2146;2147;2302;2668;2669;3042;3334;3863;4309;4357;4567;4593;4737;4738;4746;4789;5104;6643	987;988;989;990;1374;1375;1607;1608;1615;1616;3120;4251;4555;4574;4575;4576;4577;4929;4930;5611;5612;5613;5614;5615;5616;6306;6897;6898;7874;7875;9268;9269;9354;9355;9798;9799;9851;9852;10138;10139;10140;10141;10153;10154;10257;10258;10941;10942;13934;13935	955;956;957;958;959;960;1327;1328;1542;1543;1549;1550;1551;2976;4108;4382;4403;4404;4405;4406;4731;4732;5367;5368;5369;5370;5371;6034;6617;7529;7530;8977;8978;9060;9061;9062;9487;9530;9531;9783;9784;9785;9786;9796;9797;9894;9895;10561;10562;13421;13422	955;1327;1542;1551;2976;4108;4382;4403;4406;4732;5367;5371;6034;6617;7529;8978;9062;9487;9530;9783;9796;9894;10562;13422	158;159;160;161;162;163	17;197;351;354;495;521
SPAC8C9.15c|tif225|I|translation	SPAC8C9.15c|tif225|I|translation	2	2	2	>SPAC8C9.15c|tif225|I|translation initiation factor eIF2B epsilon subunit	1	2	2	2	2	2	2	2	2	2	4	4	4	76.325	678	678	0	15.775	By MS/MS	By MS/MS	4	4	17702000	5872100	11830000	0	11216000	2	1	3				449	2202;5877	True;True	2293;6157	4907;4908;13015;13016	4713;4714;12531	4713;12531
SPAC8E11.02c|rad24|I|14-3-3	SPAC8E11.02c|rad24|I|14-3-3	11	11	9	>SPAC8E11.02c|rad24|I|14-3-3 protein Rad24	1	11	11	9	9	11	9	11	7	9	54.4	54.4	51.5	30.082	270	270	0	210.37	By MS/MS	By MS/MS	44.8	54.4	252830000	115820000	137010000	124910000	118440000	12	13	25				450	35;812;2159;2805;4148;4366;4455;4488;5226;5238;6512	True;True;True;True;True;True;True;True;True;True;True	35;850;851;2249;2918;4341;4577;4671;4705;5470;5482;6810	64;65;66;67;1739;1740;1741;1742;1743;4787;4788;4789;6061;9327;9328;9816;9817;10005;10006;10007;10008;10077;10078;11619;11620;11644;14299;14300	61;62;63;64;1670;1671;1672;1673;1674;4607;4608;5796;9034;9035;9502;9503;9665;9666;9732;9733;11197;11198;11220;13795;13796	62;1674;4607;5796;9034;9503;9666;9733;11197;11220;13795	41	223
SPAC8E11.04c|SPAC8E11.04c|I|phospholipase	SPAC8E11.04c|SPAC8E11.04c|I|phospholipase	1	1	1	>SPAC8E11.04c|SPAC8E11.04c|I|phospholipase involved in depalmitoylation (predicted)	1	1	1	1	0	1	0	1	0	1	9.4	9.4	9.4	24.474	224	224	0.0049751	6.3848	By matching	By MS/MS	0	9.4	0	0	0	0	0	0	1	1				451	4742	TRUE	4968	10680	10304	10304
SPAC8E11.10|SPAC8E11.10|I|sorbose	SPAC8E11.10|SPAC8E11.10|I|sorbose	2	2	2	>SPAC8E11.10|SPAC8E11.10|I|sorbose reductase (predicted)	1	2	2	2	2	2	2	2	2	2	11	11	11	27.437	255	255	0	16.391	By MS/MS	By MS/MS	11	11	25695000	11532000	14163000	11453000	13508000	3	2	5				452	274;4762	True;True	287;4989	655;656;10725;10726	639;640;10351;10352;10353	640;10351
SPAC9.03c|brr2|I|U5	SPAC9.03c|brr2|I|U5	46	46	46	>SPAC9.03c|brr2|I|U5 snRNP complex subunit Brr2	1	46	46	46	41	41	41	41	41	41	25.5	25.5	25.5	248.81	2176	2176	0	323.31	By MS/MS	By MS/MS	22.1	22.2	561100000	281710000	279390000	277250000	269350000	36	37	73				453	71;229;285;360;371;707;845;935;996;1020;1112;1556;1830;2090;2134;2203;2380;2622;2688;2813;2992;3000;3110;3268;3403;3431;3676;4227;4462;4468;4564;4575;4724;4731;4851;5099;5205;5571;5863;6095;6225;6278;6331;6433;6553;6564	True;True;True;True;True;True;True;True;True;True;True;True;True;True;True;True;True;True;True;True;True;True;True;True;True;True;True;True;True;True;True;True;True;True;True;True;True;True;True;True;True;True;True;True;True;True	74;240;298;376;388;742;888;982;1046;1070;1167;1626;1907;2178;2223;2294;2475;2727;2796;2926;3114;3122;3241;3405;3542;3570;3822;4430;4678;4684;4785;4796;4949;4957;5086;5339;5449;5835;6143;6385;6518;6572;6625;6728;6853;6865	143;144;145;146;562;563;674;675;676;825;826;827;847;1540;1541;1810;1811;1997;1998;2119;2120;2176;2177;2369;2370;3276;3277;4116;4636;4637;4729;4730;4909;5258;5259;5721;5722;5849;6075;6076;6465;6479;6480;6712;7025;7026;7269;7270;7323;7324;7793;7794;9505;9506;10020;10021;10030;10250;10270;10650;10661;10662;10909;10910;11377;11378;11580;11581;12375;12376;12987;12988;13450;13451;13697;13698;13796;1379…	137;138;547;548;659;660;661;799;800;801;821;1480;1734;1905;1906;2030;2031;2084;2085;2265;2266;3120;3967;4462;4463;4551;4715;5026;5027;5028;5468;5469;5589;5810;5811;6200;6212;6213;6438;6738;6739;6974;6975;7024;7025;7452;7453;9203;9204;9678;9679;9686;9888;9905;10276;10286;10287;10533;10534;10969;10970;11159;11160;11924;12504;12505;12949;12950;13193;13194;13285;13286;13385;13386;13664;13665;13872;13…	138;547;659;799;821;1480;1734;1905;2031;2085;2266;3120;3967;4463;4551;4715;5026;5469;5589;5810;6200;6213;6438;6739;6975;7024;7453;9204;9679;9686;9888;9905;10276;10287;10533;10970;11159;11924;12504;12949;13194;13285;13385;13664;13872;13892	164	1044
SPAC9.07c|SPAC9.07c|I|GTPase	SPAC9.07c|SPAC9.07c|I|GTPase	2	2	2	>SPAC9.07c|SPAC9.07c|I|GTPase Rbg1 (predicted)	1	2	2	2	2	2	2	2	2	2	6.3	6.3	6.3	40.375	366	366	0	14.915	By MS/MS	By MS/MS	6.3	6.3	3784100	0	3784100	0	3587700	3	2	5				454	2486;6275	True;True	2585;6568	5456;5457;13787;13788;13789	5221;5222;13276;13277;13278	5221;13277
SPAC9.09|met26|I|homocysteine	SPAC9.09|met26|I|homocysteine	32	32	32	>SPAC9.09|met26|I|homocysteine methyltransferase Met26	1	32	32	32	30	32	30	32	30	32	48.8	48.8	48.8	85.339	764	764	0	245.52	By MS/MS	By MS/MS	46.2	48.8	834580000	392520000	442060000	385010000	396920000	31	28	59				455	43;107;118;249;276;279;559;892;918;1188;1515;1826;1827;1844;1858;1923;2005;3097;3323;3441;3442;3548;3630;4007;4645;4763;5616;6096;6131;6294;6304;6305	True;True;True;True;True;True;True;True;True;True;True;True;True;True;True;True;True;True;True;True;True;True;True;True;True;True;True;True;True;True;True;True	43;44;113;126;261;289;292;583;938;964;1245;1583;1903;1904;1921;1935;1936;2007;2091;3228;3461;3580;3581;3692;3774;3775;4197;4869;4990;5883;6386;6421;6588;6598;6599	83;84;85;86;220;221;358;359;601;602;658;663;664;1221;1222;1903;1904;1905;1961;1962;2518;2519;2520;3198;3199;4106;4107;4108;4109;4110;4111;4140;4141;4142;4143;4167;4168;4169;4293;4294;4459;4460;6686;6687;7124;7125;7343;7344;7345;7553;7554;7704;7705;7706;9035;9036;10491;10492;10727;10728;12485;12486;13452;13453;13519;13520;13824;13825;13845;13846;13847;13848	77;78;79;80;209;210;350;351;585;642;648;649;1173;1174;1819;1820;1874;2401;2402;3049;3959;3960;3961;3962;3991;3992;3993;4015;4016;4147;4148;4300;6411;6412;6837;6838;7042;7043;7044;7237;7238;7370;7371;7372;8757;8758;10131;10132;10354;10355;12027;12028;12951;12952;13016;13017;13312;13313;13333;13334;13335;13336;13337	77;210;350;585;642;649;1173;1819;1874;2402;3049;3959;3962;3991;4016;4148;4300;6411;6837;7043;7044;7238;7371;8758;10131;10354;12027;12951;13016;13312;13334;13335	165;166;167	97;119;562
SPAC926.04c|hsp90|I|Hsp90	SPAC926.04c|hsp90|I|Hsp90	42	42	42	>SPAC926.04c|hsp90|I|Hsp90 chaperone	1	42	42	42	40	41	40	41	40	41	60.2	60.2	60.2	80.595	704	704	0	323.31	By MS/MS	By MS/MS	59.7	60.2	4323700000	2278800000	2044900000	2245500000	1827400000	57	53	110				456	238;400;585;658;659;826;938;1054;1093;1094;1134;1209;1244;1254;1313;2001;2081;2207;2371;2783;2867;2891;2978;3148;3195;3240;4006;4103;4209;4387;4649;4717;5058;5105;5256;5383;5405;5857;5972;6567;6596;6597	True;True;True;True;True;True;True;True;True;True;True;True;True;True;True;True;True;True;True;True;True;True;True;True;True;True;True;True;True;True;True;True;True;True;True;True;True;True;True;True;True;True	250;418;609;610;690;691;866;867;985;1107;1148;1149;1191;1267;1303;1313;1373;2087;2168;2298;2466;2895;2896;2981;2982;3008;3098;3279;3329;3330;3376;4196;4296;4408;4599;4873;4874;4942;5298;5345;5501;5634;5658;6137;6255;6868;6899;6900	583;584;900;901;1268;1269;1270;1449;1450;1451;1769;1770;1771;2003;2004;2254;2255;2330;2331;2332;2333;2334;2335;2422;2423;2568;2569;2641;2642;2643;2644;2661;2662;2776;4450;4451;4617;4618;4619;4620;4918;4919;4920;4921;4922;5243;5244;6019;6020;6021;6022;6184;6185;6186;6187;6232;6233;6234;6235;6414;6415;6779;6780;6886;6887;6888;6889;6890;6891;6971;6972;6973;6974;9033;9034;9240;9241;9455;9456;9457;945…	567;568;870;871;1217;1218;1219;1397;1398;1399;1696;1697;1698;1911;1912;1913;2155;2156;2227;2228;2229;2230;2231;2316;2317;2443;2506;2507;2508;2509;2510;2527;2528;2626;4292;4293;4443;4444;4445;4446;4724;4725;4726;4727;5012;5013;5757;5758;5759;5760;5761;5762;5914;5915;5916;5917;5918;5959;5960;5961;6139;6498;6499;6607;6608;6609;6610;6611;6686;6687;6688;6689;8755;8756;8952;9153;9154;9155;9156;9157;954…	568;870;1217;1397;1399;1696;1912;2156;2227;2230;2317;2443;2507;2528;2626;4292;4446;4724;5012;5758;5918;5961;6139;6498;6609;6689;8756;8952;9154;9543;10142;10260;10897;10982;11252;11482;11538;12494;12721;13898;13960;13963	168;169;170;171;172;173	178;324;398;496;585;599
SPAC926.09c|fas1|I|fatty	SPAC926.09c|fas1|I|fatty	32	32	32	>SPAC926.09c|fas1|I|fatty acid synthase beta subunit Fas1	1	32	32	32	30	30	30	30	30	30	19.6	19.6	19.6	230.56	2073	2073	0	286	By MS/MS	By MS/MS	18.3	18.6	344210000	154600000	189610000	157890000	172320000	24	29	53				457	216;382;751;753;779;809;1097;1227;1232;1388;1466;1599;1803;1840;2114;2256;2360;2509;2896;5072;5657;5707;5710;5754;5828;5960;6105;6138;6153;6271;6321;6428	True;True;True;True;True;True;True;True;True;True;True;True;True;True;True;True;True;True;True;True;True;True;True;True;True;True;True;True;True;True;True;True	227;399;786;788;817;847;1152;1286;1291;1453;1533;1669;1879;1917;2203;2348;2454;2608;3013;5312;5928;5982;5985;6030;6107;6243;6395;6428;6444;6564;6615;6723	539;540;866;867;1627;1628;1633;1634;1685;1686;1734;1735;2340;2341;2609;2610;2617;2618;2619;2959;3109;3110;3475;3476;4061;4062;4132;4133;4695;4696;5023;5024;5025;5216;5217;5499;5500;6244;6245;6246;6247;11332;11333;12562;12563;12667;12668;12673;12674;12762;12763;12920;13193;13194;13470;13471;13529;13530;13556;13780;13877;13878;14149;14150	526;527;838;839;1561;1562;1567;1568;1617;1618;1664;1665;1666;2237;2238;2477;2484;2485;2815;2964;2965;3343;3344;3915;3916;3982;3983;4519;4814;4815;4986;4987;5261;5969;5970;5971;10925;10926;12103;12104;12105;12206;12207;12212;12213;12294;12295;12439;12700;12968;12969;13026;13027;13051;13269;13364;13365;13656;13657	527;838;1562;1567;1617;1664;2237;2477;2485;2815;2965;3344;3915;3982;4519;4814;4986;5261;5970;10925;12105;12207;12213;12294;12439;12700;12969;13026;13051;13269;13365;13656
SPBC19F8.08|rps401|II|40S;SPAC959.07|rps403|I|40S	SPBC19F8.08|rps401|II|40S;SPAC959.07|rps403|I|40S	11;11	1;1	1;1	>SPBC19F8.08|rps401|II|40S ribosomal protein S4 (predicted);>SPAC959.07|rps403|I|40S ribosomal protein S4 (predicted)	2	11	1	1	9	11	1	1	1	1	37	4.6	4.6	29.688	262	262;262	0.003112	6.938	By MS/MS	By MS/MS	32.4	37	19019000	8591300	10428000	0	9886300	1	1	2				458	417;925;1007;1310;1987;3509;3642;3643;3657;5278;6573	False;False;False;False;False;False;False;False;True;False;False	436;971;1057;1370;2073;3651;3788;3789;3803;5523;6875	932;1974;2149;2150;2151;2152;2771;2772;4424;4425;7473;7474;7730;7731;7732;7733;7760;7761;11725;11726;14423;14424	900;1884;2059;2060;2061;2062;2622;4265;4266;7160;7161;7392;7393;7420;7421;11294;11295;13916	900;1884;2062;2622;4265;7161;7392;7393;7420;11294;13916
SPAC959.08|rpl2102|I|60S	SPAC959.08|rpl2102|I|60S	5	5	2	>SPAC959.08|rpl2102|I|60S ribosomal protein L21 (predicted)	1	5	5	2	5	5	5	5	2	2	33.8	33.8	19.4	18.353	160	160	0	32.201	By MS/MS	By MS/MS	33.8	33.8	100220000	46566000	53650000	48821000	48610000	6	4	10				459	591;4346;4554;4709;5878	True;True;True;True;True	616;4557;4775;4934;6158	1279;1280;9781;9782;10228;10229;10618;10619;13017;13018	1227;1228;9470;9471;9870;9871;10245;10246;12532;12533	1227;9471;9871;10246;12533
SPAC977.14c|SPAC977.14c|I|aldo/keto;SPAC750.01|SPAC750.01|I|aldo/keto	SPAC977.14c|SPAC977.14c|I|aldo/keto;SPAC750.01|SPAC750.01|I|aldo/keto	18;11	18;11	18;11	>SPAC977.14c|SPAC977.14c|I|aldo/keto reductase, predicted calcium channel regulator;>SPAC750.01|SPAC750.01|I|aldo/keto reductase family protein	2	18	18	18	18	12	18	12	18	12	47.9	47.9	47.9	39.914	351	351;325	0	134.08	By MS/MS	By MS/MS	47.9	33.3	174910000	130230000	44677000	103690000	59702000	17	10	27				460	44;289;329;1413;2115;2116;2863;2889;3007;3266;3621;4684;4930;5165;5381;5432;6407;6569	True;True;True;True;True;True;True;True;True;True;True;True;True;True;True;True;True;True	45;302;345;1478;1479;2204;2205;2976;3006;3131;3132;3403;3765;4909;5168;5408;5632;5686;6702;6870	87;88;684;771;772;3008;3009;3010;4697;4698;4699;4700;6173;6229;6498;6499;7021;7022;7689;10567;10568;11058;11059;11509;11510;11922;11923;12027;12028;14056;14057;14412	81;82;669;753;2865;2866;2867;4520;4521;4522;4523;5903;5956;6228;6229;6734;6735;7355;10199;10200;10670;10671;11095;11096;11478;11479;11584;11585;13538;13902	81;669;753;2866;4520;4522;5903;5956;6228;6734;7355;10199;10671;11095;11479;11584;13538;13902	174;175	211;294
SPAC9E9.03|leu2|I|3-isopropylmalate	SPAC9E9.03|leu2|I|3-isopropylmalate	12	12	12	>SPAC9E9.03|leu2|I|3-isopropylmalate dehydratase Leu2 (predicted)	1	12	12	12	12	11	12	11	12	11	21.5	21.5	21.5	82.782	758	758	0	90.95	By MS/MS	By MS/MS	21.5	19.4	171390000	82695000	88695000	87941000	78845000	9	10	19				461	179;680;955;1003;1312;1673;2042;2046;2158;5418;5612;6397	True;True;True;True;True;True;True;True;True;True;True;True	189;713;1003;1053;1372;1746;2129;2133;2248;5671;5879;6692	471;472;1489;1490;2038;2039;2138;2139;2774;2775;3619;3620;4541;4542;4550;4785;4786;12001;12002;12478;12479;14032;14033	462;1435;1436;1952;1953;2047;2048;2624;2625;3480;3481;4371;4378;4605;4606;11560;11561;12020;12021;13516	462;1435;1953;2047;2625;3480;4371;4378;4606;11560;12021;13516
SPAC9E9.04|SPAC9E9.04|I|bcap	SPAC9E9.04|SPAC9E9.04|I|bcap	2	2	2	>SPAC9E9.04|SPAC9E9.04|I|bcap family homolog (predicted)	1	2	2	2	2	1	2	1	2	1	13.3	13.3	13.3	21.238	188	188	0	12.52	By MS/MS	By MS/MS	13.3	4.8	12323000	6896100	5426400	0	5144700	2	1	3				462	497;1253	True;True	518;1312	1102;1103;2660	1064;1065;2526	1064;2526
SPAC9E9.06c|SPAC9E9.06c|I|threonine	SPAC9E9.06c|SPAC9E9.06c|I|threonine	1	1	1	>SPAC9E9.06c|SPAC9E9.06c|I|threonine synthase (predicted)	1	1	1	1	0	1	0	1	0	1	3.1	3.1	3.1	57.631	514	514	0.0022396	7.7556	By matching	By MS/MS	0	3.1	5183600	0	5183600	0	4914500	0	1	1				463	4860	TRUE	5095	10926	10547	10547
SPAC9E9.08|rad26|I|ATRIP,	SPAC9E9.08|rad26|I|ATRIP,	2	2	2	>SPAC9E9.08|rad26|I|ATRIP, ATR checkpoint kinase regulatory subunit Rad26	1	2	2	2	0	2	0	2	0	2	4.9	4.9	4.9	68.921	614	614	0	11.437	By matching	By MS/MS	0	4.9	0	0	0	0	0	0	2	2				464	1175;4912	True;True	1232;5149	2497;11028	2384;10640	2384;10640
SPAC9E9.09c|atd1|I|aldehyde	SPAC9E9.09c|atd1|I|aldehyde	32	32	32	>SPAC9E9.09c|atd1|I|aldehyde dehydrogenase (predicted)	1	32	32	32	31	29	31	29	31	29	72.2	72.2	72.2	54.768	503	503	0	323.31	By MS/MS	By MS/MS	72.2	72.2	2100300000	1100200000	1000100000	1014100000	966800000	37	37	74				465	10;507;574;867;945;1083;1614;1615;1682;1869;2095;2096;2294;2806;2993;3019;3294;3749;4671;5306;5455;5456;5713;5740;5881;6157;6185;6286;6287;6673;6674;6675	True;True;True;True;True;True;True;True;True;True;True;True;True;True;True;True;True;True;True;True;True;True;True;True;True;True;True;True;True;True;True;True	10;528;529;598;911;992;1138;1684;1685;1755;1949;2183;2184;2386;2919;3115;3146;3431;3896;4896;5553;5709;5710;5988;6015;6161;6448;6477;6580;6581;6977;6978;6979	18;19;1121;1122;1123;1124;1246;1247;1248;1249;1854;2015;2016;2313;2314;3505;3506;3507;3635;3636;4192;4193;4646;4647;4648;5089;5090;6062;6063;6466;6467;6530;6531;7071;7072;7931;7932;7933;7934;10546;10547;11781;11782;12076;12077;12078;12079;12679;12680;12681;12682;12731;12732;13023;13024;13563;13564;13616;13617;13811;13812;13813;13814;14639;14640;14641;14642;14643;14644;14645	17;18;1083;1084;1085;1086;1197;1198;1199;1771;1923;1924;1925;1926;1927;2211;2212;3371;3372;3373;3374;3494;3495;4039;4040;4041;4042;4043;4472;4473;4474;4870;4871;5797;5798;6201;6202;6259;6788;6789;6790;7584;7585;7586;7587;10181;10182;10183;11346;11347;11348;11629;11630;11631;12217;12218;12219;12220;12221;12222;12267;12536;12537;13059;13060;13110;13111;13299;13300;13301;13302;13303;14122;14123;1412…	17;1083;1198;1771;1923;2212;3371;3374;3494;4043;4473;4474;4871;5798;6202;6259;6789;7584;10181;11348;11629;11631;12220;12267;12537;13060;13111;13300;13301;14122;14123;14126	176	499
SPAC9E9.11|plr1|I|pyridoxal	SPAC9E9.11|plr1|I|pyridoxal	9	9	9	>SPAC9E9.11|plr1|I|pyridoxal reductase Plr1	1	9	9	9	9	9	9	9	9	9	31.8	31.8	31.8	36.814	333	333	0	62.391	By MS/MS	By MS/MS	31.8	31.8	159650000	105490000	54164000	102160000	54677000	10	7	17				466	190;1551;4155;4862;5246;5544;5671;5902;6580	True;True;True;True;True;True;True;True;True	200;1621;4349;5097;5491;5807;5943;6182;6883	491;492;3267;3268;9339;9340;10928;10929;10930;11662;11663;11664;11665;12323;12324;12593;12594;13057;13058;14438;14439	479;480;3111;3112;9046;10549;10550;10551;11236;11237;11238;11874;11875;12134;12569;12570;13930;13931	480;3112;9046;10549;11236;11874;12134;12569;13931	177	17
SPAC9E9.13|wos2|I|p23	SPAC9E9.13|wos2|I|p23	1	1	1	>SPAC9E9.13|wos2|I|p23 homolog, predicted co-chaperone Wos2	1	1	1	1	0	1	0	1	0	1	4.3	4.3	4.3	20.951	186	186	0.0040363	6.5407	By matching	By MS/MS	0	4.3	2687900	0	2687900	0	2548400	0	1	1				467	6492	TRUE	6790	14267	13768	13768
SPAC9G1.02|wis4|I|MAP	SPAC9G1.02|wis4|I|MAP	3	3	3	>SPAC9G1.02|wis4|I|MAP kinase kinase kinase Wis4	1	3	3	3	2	3	2	3	2	3	2.9	2.9	2.9	160.54	1401	1401	0	20.208	By MS/MS	By MS/MS	1.9	2.9	8329400	1218900	7110600	0	6741400	2	3	5				468	3044;4250;5302	True;True;True	3173;4454;5549	6584;6585;9546;9547;11774	6310;6311;9239;9240;11340	6311;9239;11340
SPAC9G1.05|aip1|I|actin	SPAC9G1.05|aip1|I|actin	4	4	4	>SPAC9G1.05|aip1|I|actin cortical patch component Aip1	1	4	4	4	2	4	2	4	2	4	7.7	7.7	7.7	65.266	595	595	0	27.974	By MS/MS	By MS/MS	3.5	7.7	20038000	6931400	13106000	8747800	10609000	1	2	3				469	1555;2815;4541;6293	True;True;True;True	1625;2928;4761;6587	3275;6078;6079;10206;10207;13823	3119;5813;9850;13311	3119;5813;9850;13311
SPAC9G1.11c|spn4|I|mitotic	SPAC9G1.11c|spn4|I|mitotic	1	1	1	>SPAC9G1.11c|spn4|I|mitotic septin Spn4	1	1	1	1	1	1	1	1	1	1	3.4	3.4	3.4	44.773	380	380	0.0040323	6.5173	By matching	By MS/MS	3.4	3.4	4483800	2067100	2416700	0	2291200	0	1	1				470	5650	TRUE	5921	12548;12549	12088	12088
SPACUNK4.07c|cta4|I|P-type	SPACUNK4.07c|cta4|I|P-type	2	2	2	>SPACUNK4.07c|cta4|I|P-type ATPase, calcium transporting Cta4	1	2	2	2	2	1	2	1	2	1	1.7	1.7	1.7	136.26	1211	1211	0.002381	10.539	By MS/MS	By MS/MS	1.7	1	2732300	1139300	1593100	0	1510400	1	0	1				471	960;3088	True;True	1008;3219	2045;6671;6672	1958;6397	1958;6397
SPACUNK4.12c|iph1|I|insulinase	SPACUNK4.12c|iph1|I|insulinase	1	1	1	>SPACUNK4.12c|iph1|I|insulinase pombe homologue 1	1	1	1	1	0	1	0	1	0	1	1.3	1.3	1.3	112.14	969	969	0.0022297	7.696	By matching	By MS/MS	0	1.3	1417300	0	1417300	0	1343700	0	1	1				472	385	TRUE	402	872	843	843
SPACUNK4.16c|SPACUNK4.16c|I|alpha,alpha-trehalose-phosphate	SPACUNK4.16c|SPACUNK4.16c|I|alpha,alpha-trehalose-phosphate	21	21	21	>SPACUNK4.16c|SPACUNK4.16c|I|alpha,alpha-trehalose-phosphate synthase (predicted)	1	21	21	21	17	20	17	20	17	20	31.2	31.2	31.2	106.82	944	944	0	170.85	By MS/MS	By MS/MS	24	30.4	357300000	173860000	183440000	177040000	163540000	14	19	33				473	367;545;583;886;1018;1147;2047;2124;2243;2434;2520;2555;2636;2644;3793;4088;4460;4673;5472;5651;5692	True;True;True;True;True;True;True;True;True;True;True;True;True;True;True;True;True;True;True;True;True	383;568;607;932;1068;1204;2134;2213;2334;2531;2620;2656;2742;2750;3941;4281;4676;4898;5726;5727;5922;5967	840;1193;1264;1265;1890;1891;2173;2174;2444;4551;4552;4714;4715;4716;4996;4997;5360;5361;5528;5529;5589;5590;5745;5746;5759;5760;8030;8031;9217;10016;10017;10549;10550;12123;12124;12125;12126;12127;12550;12551;12640	814;1148;1213;1214;1806;2081;2082;2339;4379;4380;4537;4538;4539;4788;4789;5123;5124;5288;5345;5346;5490;5491;5505;5506;7680;8930;9674;9675;10185;10186;11674;11675;11676;11677;12089;12090;12179	814;1148;1213;1806;2081;2339;4379;4537;4788;5124;5288;5345;5491;5505;7680;8930;9675;10185;11674;12089;12179	178	714
SPAP27G11.06c|vas2|I|AP-1	SPAP27G11.06c|vas2|I|AP-1	2	2	2	>SPAP27G11.06c|vas2|I|AP-1 adaptor complex sigma subunit Aps1	1	2	2	2	0	2	0	2	0	2	9.3	9.3	9.3	18.647	162	162	0	11.408	By matching	By MS/MS	0	9.3	1519500	0	1519500	0	1440700	0	2	2				474	1347;6307	True;True	1409;6601	2854;13850	2714;13339	2714;13339
SPAP7G5.02c|gua2|I|GMP	SPAP7G5.02c|gua2|I|GMP	7	7	7	>SPAP7G5.02c|gua2|I|GMP synthase [glutamine-hydrolyzing] Gua2 (predicted)	1	7	7	7	6	7	6	7	6	7	14.1	14.1	14.1	60.044	539	539	0	47.931	By MS/MS	By MS/MS	12.6	14.1	40908000	18962000	21946000	19225000	20544000	7	6	13				475	298;2493;2551;3497;4841;5436;5438	True;True;True;True;True;True;True	312;2592;2652;3639;5076;5690;5692	701;702;703;5469;5470;5581;5582;7454;10892;10893;12034;12035;12037;12038	687;688;689;5233;5234;5338;5339;7144;10518;10519;11590;11591;11593	689;5234;5338;7144;10519;11590;11593
SPAP7G5.04c|lys1|I|aminoadipate-semialdehyde	SPAP7G5.04c|lys1|I|aminoadipate-semialdehyde	12	12	12	>SPAP7G5.04c|lys1|I|aminoadipate-semialdehyde dehydrogenase	1	12	12	12	9	9	9	9	9	9	10.1	10.1	10.1	156.89	1419	1419	0	84.609	By MS/MS	By MS/MS	7.7	7.3	48510000	22234000	26276000	24018000	23128000	8	7	15				476	1960;2346;2382;2738;3348;3756;5122;5269;5276;5587;6072;6362	True;True;True;True;True;True;True;True;True;True;True;True	2046;2440;2477;2850;3486;3903;5362;5514;5521;5853;6362;6657	4371;4372;5189;5262;5944;7167;7168;7946;11422;11707;11708;11720;12431;12432;13407;13408;13967;13968	4216;4962;5031;5684;6877;6878;7598;11013;11278;11279;11289;11978;12905;12906;13451;13452	4216;4962;5031;5684;6878;7598;11013;11278;11289;11978;12906;13452
SPAP7G5.05|rpl1002|I|60S	SPAP7G5.05|rpl1002|I|60S	7	7	1	>SPAP7G5.05|rpl1002|I|60S ribosomal protein L10	1	7	7	1	7	7	7	7	1	1	44.3	44.3	5	25.359	221	221	0	172.22	By MS/MS	By MS/MS	44.3	44.3	353080000	185400000	167680000	158880000	160510000	7	8	15				477	188;455;1687;1920;2035;6068;6312	True;True;True;True;True;True;True	198;475;1760;2004;2122;6355;6356;6606	486;487;1019;1020;3656;3657;4287;4288;4527;4528;13394;13395;13396;13397;13398;13399;13859;13860	475;476;986;987;3519;3520;4142;4359;4360;12893;12894;12895;12896;12897;13348;13349	475;986;3519;4142;4359;12897;13349	179	136
SPAP8A3.07c|SPAP8A3.07c|I|phospho-2-dehydro-3-deoxyheptonate	SPAP8A3.07c|SPAP8A3.07c|I|phospho-2-dehydro-3-deoxyheptonate	7	7	7	>SPAP8A3.07c|SPAP8A3.07c|I|phospho-2-dehydro-3-deoxyheptonate aldolase (predicted)	1	7	7	7	3	7	3	7	3	7	22.8	22.8	22.8	40.638	372	372	0	62.565	By MS/MS	By MS/MS	10.8	22.8	30522000	11321000	19201000	17226000	12299000	3	5	8				478	59;1038;1854;1887;2882;4443;6004	True;True;True;True;True;True;True	60;1090;1931;1969;2998;4659;6287	118;2212;4160;4161;4226;6216;6217;9983;9984;13270	113;2116;4009;4010;4082;5944;5945;9645;12773	113;2116;4009;4082;5944;9645;12773
SPAP8A3.08|cdc4|I|myosin	SPAP8A3.08|cdc4|I|myosin	2	2	2	>SPAP8A3.08|cdc4|I|myosin II light chain	1	2	2	2	2	2	2	2	2	2	11.3	11.3	11.3	15.661	141	141	0	11.521	By MS/MS	By MS/MS	11.3	11.3	15965000	8659700	7305700	0	6926400	1	1	2				479	4368;5623	True;True	4579;5890	9820;9821;12497;12498	9505;12039;12040	9505;12040
SPAP8A3.09c|paa1|I|protein	SPAP8A3.09c|paa1|I|protein	4	4	4	>SPAP8A3.09c|paa1|I|protein phosphatase regulatory subunit Paa1	1	4	4	4	4	2	4	2	4	2	10.3	10.3	10.3	66.616	590	590	0	30.917	By MS/MS	By MS/MS	10.3	5.4	15833000	9976500	5856800	7686800	7842500	4	2	6				480	1600;2793;3670;6224	True;True;True;True	1670;2906;3816;6517	3477;6039;6040;7782;7783;13696	3345;5779;5780;7443;7444;13192	3345;5780;7444;13192
SPAP8A3.12c|tpp2|I|tripeptidyl-peptidase	SPAP8A3.12c|tpp2|I|tripeptidyl-peptidase	1	1	1	>SPAP8A3.12c|tpp2|I|tripeptidyl-peptidase II Tpp2	1	1	1	1	0	1	0	1	0	1	0.8	0.8	0.8	142.92	1274	1274	0.0068093	6.235	By matching	By MS/MS	0	0.8	0	0	0	0	0	0	1	1				481	2065	TRUE	2152	4586	4414	4414
SPAPB17E12.13|rpl1802|I|60S;SPBC11C11.07|rpl1801|II|60S	SPAPB17E12.13|rpl1802|I|60S;SPBC11C11.07|rpl1801|II|60S	4;3	4;3	4;3	>SPAPB17E12.13|rpl1802|I|60S ribosomal protein L18 (predicted);>SPBC11C11.07|rpl1801|II|60S ribosomal protein L18	2	4	4	4	3	4	3	4	3	4	20.9	20.9	20.9	21.184	187	187;187	0	23.971	By MS/MS	By MS/MS	17.1	20.9	18488000	6973900	11514000	8859500	9030800	2	4	6				482	166;2073;3674;5570	True;True;True;True	176;2160;3820;5834	448;449;4602;4603;7790;12373;12374	438;439;4429;4430;7449;11922;11923	439;4430;7449;11923
SPAPB17E12.14c|SPAPB17E12.14c|I|6-phosphofructo-2-kinase/fructose-2,6-bisphosphate	SPAPB17E12.14c|SPAPB17E12.14c|I|6-phosphofructo-2-kinase/fructose-2,6-bisphosphate	4	4	4	>SPAPB17E12.14c|SPAPB17E12.14c|I|6-phosphofructo-2-kinase/fructose-2,6-bisphosphate 2-phosphatase (predicted)	1	4	4	4	3	3	3	3	3	3	6.1	6.1	6.1	76.392	668	668	0	25.151	By MS/MS	By MS/MS	4.6	4.3	10554000	8827600	1726400	8827600	0	2	3	5				483	143;2438;2497;3045	True;True;True;True	153;2535;2596;3174	405;406;5368;5477;6586;6587	396;397;5134;5241;6312;6313	396;5134;5241;6312
SPAPB1A10.12c|alo1|I|D-arabinono-1,4-lactone	SPAPB1A10.12c|alo1|I|D-arabinono-1,4-lactone	1	1	1	>SPAPB1A10.12c|alo1|I|D-arabinono-1,4-lactone oxidase (predicted)	1	1	1	1	1	0	1	0	1	0	2.2	2.2	2.2	52.027	461	461	0.0030706	6.7238	By MS/MS	By matching	2.2	0	2077300	2077300	0	2077300	0	1	0	1				484	1963	TRUE	2049	4378	4222	4222
SPAPB1A10.16|SPAPB1A10.16|I|conserved	SPAPB1A10.16|SPAPB1A10.16|I|conserved	2	2	2	>SPAPB1A10.16|SPAPB1A10.16|I|conserved fungal protein	1	2	2	2	1	1	1	1	1	1	18.2	18.2	18.2	16.838	143	143	0	14.754	By MS/MS	By MS/MS	9.8	8.4	8123300	8123300	0	8123300	0	1	1	2				485	4494;4893	True;True	4711;5129	10090;10989	9743;10608	9743;10608
SPAPB1E7.07|glt1|I|glutamate	SPAPB1E7.07|glt1|I|glutamate	38	38	38	>SPAPB1E7.07|glt1|I|glutamate synthase Glt1 (predicted)	1	38	38	38	31	35	31	35	31	35	22.4	22.4	22.4	232.85	2111	2111	0	297.98	By MS/MS	By MS/MS	19	20.5	358770000	160240000	198530000	172470000	163310000	26	31	57				486	45;63;75;168;213;537;571;1266;1358;1378;1564;1660;1776;1900;1996;2039;2419;2584;3012;3247;3475;3872;3894;3918;3931;4111;4126;4514;4563;5038;5262;5393;5750;5769;6233;6308;6371;6393	True;True;True;True;True;True;True;True;True;True;True;True;True;True;True;True;True;True;True;True;True;True;True;True;True;True;True;True;True;True;True;True;True;True;True;True;True;True	46;64;78;79;178;224;560;595;1325;1420;1441;1634;1731;1851;1852;1983;2082;2126;2516;2687;3139;3383;3615;4024;4056;4088;4108;4304;4319;4732;4784;5278;5507;5644;6025;6045;6526;6602;6666;6688	89;90;124;125;150;151;152;452;453;534;535;1180;1181;1182;1241;2682;2874;2912;2913;3291;3292;3591;3592;3997;3998;3999;4000;4250;4440;4441;4535;4536;5330;5331;5332;5648;5649;6514;6515;6988;6989;7409;7410;8191;8379;8444;8606;8607;9257;9258;9285;9286;10129;10130;10248;10249;11268;11269;11690;11945;11946;12753;12754;12790;12791;13712;13713;13851;13983;13984;14026	83;84;119;143;144;145;442;443;521;522;1137;1138;1192;2546;2733;2769;3134;3452;3453;3856;3857;3858;3859;3860;4107;4281;4282;4365;5093;5094;5095;5400;5401;6243;6244;6702;6703;7101;7102;7832;8025;8081;8263;8264;8967;8994;8995;9773;9774;9886;9887;10869;10870;11263;11502;11503;12285;12286;12319;12320;13208;13209;13340;13466;13467;13510	84;119;145;443;521;1138;1192;2546;2733;2769;3134;3452;3858;4107;4281;4365;5094;5401;6244;6703;7101;7832;8025;8081;8264;8967;8994;9774;9887;10869;11263;11502;12285;12319;13208;13340;13467;13510	180;181	1801;1872
SPAPB1E7.09|ogm2|I|protein	SPAPB1E7.09|ogm2|I|protein	4	4	4	>SPAPB1E7.09|ogm2|I|protein O-mannosyltransferase Ogm2	1	4	4	4	3	4	3	4	3	4	7.2	7.2	7.2	85.036	739	739	0	26.153	By MS/MS	By MS/MS	6.1	7.2	21338000	8055900	13282000	8883900	11764000	2	2	4				487	379;2208;3145;6334	True;True;True;True	396;2299;3276;6628	861;862;4923;4924;6772;13903;13904	833;834;4728;6493;13391;13392	833;4728;6493;13391
SPAPB2B4.06|SPAPB2B4.06|I|conserved	SPAPB2B4.06|SPAPB2B4.06|I|conserved	1	1	1	>SPAPB2B4.06|SPAPB2B4.06|I|conserved fungal protein	1	1	1	1	1	0	1	0	1	0	3.1	3.1	3.1	28.617	255	255	0.0058824	6.2828	By MS/MS	By matching	3.1	0	9684000	9684000	0	9684000	0	1	0	1				488	1237	TRUE	1296	2630	2495	2495
SPAPB8E5.07c|rrp12|I|rRNA	SPAPB8E5.07c|rrp12|I|rRNA	3	3	3	>SPAPB8E5.07c|rrp12|I|rRNA processing protein Rrp12 (predicted)	1	3	3	3	1	3	1	3	1	3	2.1	2.1	2.1	130.53	1163	1163	0	16.731	By MS/MS	By MS/MS	0.6	2.1	12262000	5650700	6611800	0	6268500	1	2	3				489	541;3401;5037	True;True;True	564;3540;5277	1187;7266;7267;11267	1143;6972;10868	1143;6972;10868
SPAPB8E5.09|rvb1|I|AAA	SPAPB8E5.09|rvb1|I|AAA	4	4	4	>SPAPB8E5.09|rvb1|I|AAA family ATPase Rvb1	1	4	4	4	3	2	3	2	3	2	13.8	13.8	13.8	50.052	456	456	0	30.534	By MS/MS	By MS/MS	9.6	8.1	27783000	7347700	20435000	0	19374000	4	2	6				490	1937;1976;5320;6651	True;True;True;True	2023;2062;5567;6955	4324;4325;4403;4404;11808;14591	4174;4175;4244;4245;11369;14077	4174;4245;11369;14077
SPAPJ696.01c|vps17|I|retromer	SPAPJ696.01c|vps17|I|retromer	11	11	11	>SPAPJ696.01c|vps17|I|retromer complex subunit Vps17	1	11	11	11	11	10	11	10	11	10	25	25	25	60.92	549	549	0	115.32	By MS/MS	By MS/MS	25	23.3	242750000	114740000	128020000	112520000	123580000	10	9	19				491	2773;3455;3459;3920;4079;4577;5344;5568;5639;5640;5810	True;True;True;True;True;True;True;True;True;True;True	2885;3595;3599;4090;4272;4798;5592;5832;5909;5910;6088	6003;6004;7370;7371;7378;7379;7380;8446;8447;9202;9203;10273;10274;11852;11853;12370;12528;12529;12530;12531;12882;12883	5738;5739;7065;7066;7073;7074;7075;8083;8917;8918;9908;9909;11412;11413;11920;12070;12071;12072;12407	5738;7066;7075;8083;8918;9908;11412;11920;12070;12072;12407
SPAPJ696.02|lsb4|I|actin	SPAPJ696.02|lsb4|I|actin	5	5	5	>SPAPJ696.02|lsb4|I|actin cortical patch component Lsb4 (predicted)	1	5	5	5	4	5	4	5	4	5	12.1	12.1	12.1	46.373	430	430	0	34.394	By MS/MS	By MS/MS	10	12.1	35128000	17085000	18043000	17152000	17040000	4	5	9				492	164;1852;2448;2594;3458	True;True;True;True;True	174;1929;2545;2697;3598	444;445;4157;5386;5387;5666;5667;7376;7377	434;435;4007;5152;5153;5419;5420;7071;7072	434;4007;5153;5419;7071
SPAPJ698.02c|rps002|I|40S	SPAPJ698.02c|rps002|I|40S	9	9	8	>SPAPJ698.02c|rps002|I|40S ribosomal protein S0B	1	9	9	8	9	8	9	8	8	7	33.4	33.4	29.3	31.42	287	287	0	78.191	By MS/MS	By MS/MS	33.4	27.5	232030000	118680000	113350000	114070000	104690000	9	7	16				493	106;1579;3314;3886;4144;4358;4782;4940;5929	True;True;True;True;True;True;True;True;True	112;1649;3452;4045;4046;4337;4569;5010;5178;6210	218;219;3437;3438;7106;7107;7108;8356;8357;8358;8359;9319;9320;9802;9803;10766;10767;11084;11085;13113	207;208;3304;3305;6822;6823;8008;8009;8010;9027;9489;9490;10393;10394;10693;10694;12622	207;3304;6822;8008;9027;9489;10393;10694;12622	182	37
SPAPJ698.03c|prp12|I|U2	SPAPJ698.03c|prp12|I|U2	1	1	1	>SPAPJ698.03c|prp12|I|U2 snRNP-associated protein Sap130	1	1	1	1	0	1	0	1	0	1	1.2	1.2	1.2	134.97	1206	1206	0.0059172	6.3071	By matching	By MS/MS	0	1.2	3672100	0	3672100	0	3481500	0	1	1				494	5678	TRUE	5950	12610	12147	12147
SPAPYUG7.05|SPAPYUG7.05|I|delta-1-pyrroline-5-carboxylate	SPAPYUG7.05|SPAPYUG7.05|I|delta-1-pyrroline-5-carboxylate	1	1	1	>SPAPYUG7.05|SPAPYUG7.05|I|delta-1-pyrroline-5-carboxylate reductase (predicted)	1	1	1	1	1	1	1	1	1	1	3.2	3.2	3.2	29.875	282	282	0.0031185	6.9651	By MS/MS	By MS/MS	3.2	3.2	6901800	2710700	4191100	0	3973500	1	1	2				495	3322	TRUE	3460	7122;7123	6835;6836	6836
SPBC106.03|SPBC106.03|II|DUF1776	SPBC106.03|SPBC106.03|II|DUF1776	3	3	3	>SPBC106.03|SPBC106.03|II|DUF1776 family protein	1	3	3	3	1	2	1	2	1	2	9.8	9.8	9.8	40.006	357	357	0	17.265	By MS/MS	By MS/MS	2.5	7.3	1798400	1798400	0	1798400	0	1	2	3				496	1461;3227;6289	True;True;True	1528;3363;6583	3102;6947;13817	2958;6662;13306	2958;6662;13306
SPBC106.04|ada1|II|adenosine	SPBC106.04|ada1|II|adenosine	21	21	21	>SPBC106.04|ada1|II|adenosine deaminase Ada1	1	21	21	21	21	19	21	19	21	19	26.2	26.2	26.2	95.886	831	831	0	227.15	By MS/MS	By MS/MS	26.2	22.7	491930000	222540000	269390000	227320000	250630000	22	15	37				497	351;1152;1223;1306;1472;1841;3288;3432;3610;3647;3833;4254;4284;4285;4896;5576;5941;6330;6332;6514;6593	True;True;True;True;True;True;True;True;True;True;True;True;True;True;True;True;True;True;True;True;True	367;1209;1282;1366;1539;1918;3425;3571;3754;3793;3982;4460;4490;4491;5132;5840;6222;6624;6626;6812;6896	806;807;2452;2453;2454;2602;2603;2764;2765;3118;3119;4134;4135;7060;7061;7325;7326;7670;7671;7741;8115;8116;9558;9559;9621;9622;9623;9624;10994;10995;12385;13139;13140;13895;13896;13899;13900;14302;14303;14468;14469	784;785;2347;2348;2349;2471;2472;2617;2974;2975;3984;3985;3986;6777;6778;7026;7027;7339;7401;7758;9252;9253;9308;9309;9310;9311;10611;10612;11932;12648;12649;13383;13384;13387;13388;13798;13799;13956;13957	784;2348;2471;2617;2974;3985;6777;7026;7339;7401;7758;9253;9308;9311;10611;11932;12648;13384;13388;13798;13957
SPBC106.06|cct4|II|chaperonin-containing	SPBC106.06|cct4|II|chaperonin-containing	19	19	19	>SPBC106.06|cct4|II|chaperonin-containing T-complex delta subunit Cct4	1	19	19	19	17	18	17	18	17	18	36.1	36.1	36.1	56.968	527	527	0	154.94	By MS/MS	By MS/MS	32.4	36.1	4686100000	2591900000	2094200000	2188200000	2389200000	12	17	29				498	41;158;308;620;1656;1777;2170;2328;2803;2838;2879;3239;3654;5006;5201;5234;5693;5773;5774	True;True;True;True;True;True;True;True;True;True;True;True;True;True;True;True;True;True;True	41;168;322;651;1727;1853;2260;2422;2916;2951;2995;3375;3800;5245;5445;5478;5968;6049;6050	78;79;433;721;722;1361;1362;3583;3584;4001;4002;4003;4004;4810;4811;5154;5155;6058;6120;6121;6211;6212;6968;6969;6970;7754;7755;11209;11210;11573;11574;11637;11638;12641;12642;12796;12797;12798	74;423;706;1315;3444;3445;3861;3862;3863;4626;4627;4929;4930;5794;5853;5854;5939;5940;6683;6684;6685;7414;7415;10813;10814;11152;11153;11213;11214;12180;12181;12325;12326	74;423;706;1315;3444;3862;4626;4930;5794;5854;5940;6685;7415;10813;11152;11214;12180;12325;12326
SPBC106.09|cut4|II|anaphase-promoting	SPBC106.09|cut4|II|anaphase-promoting	1	1	1	>SPBC106.09|cut4|II|anaphase-promoting complex, platform subcomplex scaffold subunit Apc1	1	1	1	1	1	1	1	1	1	1	0.5	0.5	0.5	165.41	1458	1458	0.0058939	6.3007	By matching	By MS/MS	0.5	0.5	8463600	5014500	3449100	0	3270000	0	0	0				499	6171	TRUE	6463	13590;13591	13083	13083
SPBC106.10|pka1|II|cAMP-dependent	SPBC106.10|pka1|II|cAMP-dependent	2	2	2	>SPBC106.10|pka1|II|cAMP-dependent protein kinase catalytic subunit Pka1	1	2	2	2	2	2	2	2	2	2	3.3	3.3	3.3	57.577	512	512	0	12.158	By MS/MS	By MS/MS	3.3	3.3	4158700	2790200	1368500	2790200	0	1	2	3				500	2772;3835	True;True	2884;3984	6001;6002;8118;8119	5736;5737;7760	5737;7760
SPBC106.13|gid9|II|GID	SPBC106.13|gid9|II|GID	8	8	8	>SPBC106.13|gid9|II|GID complex subunit Gid9 (predicted)	1	8	8	8	6	8	6	8	6	8	23.5	23.5	23.5	45.857	404	404	0	57.023	By MS/MS	By MS/MS	18.6	23.5	55709000	22696000	33014000	26067000	27929000	5	5	10				501	194;774;810;962;2355;4194;6272;6591	True;True;True;True;True;True;True;True	204;811;848;1010;2449;4393;6565;6894	500;1672;1673;1736;1737;2048;2049;2050;5207;9417;9418;13781;13782;14464;14465	490;1605;1667;1668;1961;1962;4978;9119;13270;13271;13952;13953	490;1605;1668;1961;4978;9119;13271;13952
SPBC106.16|pre6|II|20S	SPBC106.16|pre6|II|20S	3	3	3	>SPBC106.16|pre6|II|20S proteasome complex subunit alpha 4 Pre6	1	3	3	3	2	3	2	3	2	3	19.3	19.3	19.3	28.277	259	259	0	20.476	By MS/MS	By MS/MS	15.1	19.3	28800000	16027000	12773000	16011000	12126000	2	3	5				502	1862;3450;6640	True;True;True	1941;3590;6944	4175;7360;7361;14572;14573	4022;7057;7058;14060;14061	4022;7057;14061
SPBC106.17c|cys2|II|homoserine	SPBC106.17c|cys2|II|homoserine	2	2	2	>SPBC106.17c|cys2|II|homoserine O-acetyltransferase (predicted)	1	2	2	2	2	1	2	1	2	1	3.8	3.8	3.8	56.362	504	504	0	12.359	By MS/MS	By MS/MS	3.8	1.8	9925400	6555100	3370300	6555100	0	1	1	2				503	411;4924	True;True	430;5162	924;11047;11048	892;10660;10661	892;10660
SPBC106.18|rpl2501|II|60S;SPBC4F6.04|rpl2502|II|60S	SPBC106.18|rpl2501|II|60S;SPBC4F6.04|rpl2502|II|60S	2;1	2;1	2;1	>SPBC106.18|rpl2501|II|60S ribosomal protein L25 (predicted);>SPBC4F6.04|rpl2502|II|60S ribosomal protein L25 (predicted)	2	2	2	2	1	2	1	2	1	2	14.9	14.9	14.9	15.835	141	141;141	0	12.687	By MS/MS	By MS/MS	9.2	14.9	6768500	2918200	3850300	0	3650400	1	2	3				504	2511;3859	True;True	2610;4008	5504;5505;8163	5265;5266;7802	5265;7802
SPBC106.20|exo70|II|exocyst	SPBC106.20|exo70|II|exocyst	1	1	1	>SPBC106.20|exo70|II|exocyst complex subunit Exo70	1	1	1	1	1	1	1	1	1	1	3.1	3.1	3.1	69.041	615	615	0.0023015	8.3486	By MS/MS	By MS/MS	3.1	3.1	2815400	1342200	1473200	0	1396700	1	1	2				505	3436	TRUE	3575	7332;7333	7033;7034	7034
SPBC1105.02c|lys4|II|homocitrate	SPBC1105.02c|lys4|II|homocitrate	12	12	12	>SPBC1105.02c|lys4|II|homocitrate synthase	1	12	12	12	12	12	12	12	12	12	37.8	37.8	37.8	46.292	418	418	0	201.29	By MS/MS	By MS/MS	37.8	37.8	339790000	167120000	172670000	163830000	148170000	14	13	27				506	236;282;778;974;975;3707;3971;4048;4630;4794;5777;6079	True;True;True;True;True;True;True;True;True;True;True;True	247;248;295;816;1022;1023;3853;4160;4240;4853;5025;6053;6369	576;577;578;579;580;668;669;1683;1684;2073;2074;2075;2076;7851;7852;8713;8714;9143;9144;10460;10461;10798;10799;12818;12819;13419;13420	560;561;562;563;564;653;654;655;1615;1616;1984;1985;1986;1987;1988;7507;7508;8367;8368;8860;8861;10100;10101;10425;12351;12352;12918;12919	561;654;1616;1985;1988;7508;8367;8861;10100;10425;12352;12918	183	342
SPBC115.03|SPBC115.03|II|gfo/idh/mocA	SPBC115.03|SPBC115.03|II|gfo/idh/mocA	2	2	2	>SPBC115.03|SPBC115.03|II|gfo/idh/mocA family oxidoreductase (predicted)	1	2	2	2	2	1	2	1	2	1	6.2	6.2	6.2	41.271	368	368	0	14.293	By MS/MS	By MS/MS	6.2	2.7	7150100	3991000	3159100	0	2995100	2	1	3				507	3259;5022	True;True	3396;5261	7008;11237;11238	6722;10839;10840	6722;10839
SPBC119.01|rpn3|II|19S	SPBC119.01|rpn3|II|19S	7	7	7	>SPBC119.01|rpn3|II|19S proteasome regulatory subunit Rpn3	1	7	7	7	6	4	6	4	6	4	17.7	17.7	17.7	57.346	497	497	0	52.766	By MS/MS	By MS/MS	15.5	9.9	41809000	17101000	24708000	23399000	17127000	6	3	9				508	1300;2429;3248;3489;5545;5620;5685	True;True;True;True;True;True;True	1360;2526;3384;3631;5808;5887;5958	2752;5349;5350;6990;7437;12325;12326;12492;12625;12626	2606;5111;5112;6704;7129;11876;11877;12034;12161	2606;5111;6704;7129;11876;12034;12161
SPBC119.02|ubc4|II|ubiquitin	SPBC119.02|ubc4|II|ubiquitin	2	2	2	>SPBC119.02|ubc4|II|ubiquitin conjugating enzyme E2 Ubc4/UbcP1	1	2	2	2	2	2	2	2	2	2	25.9	25.9	25.9	16.476	147	147	0	21.499	By MS/MS	By MS/MS	25.9	25.9	60458000	31670000	28788000	31208000	27755000	1	2	3				509	801;6013	True;True	839;6296	1722;1723;13287;13288	1653;12789;12790	1653;12790
SPBC119.08|pmk1|II|MAP	SPBC119.08|pmk1|II|MAP	6	5	5	>SPBC119.08|pmk1|II|MAP kinase Pmk1	1	6	5	5	6	5	5	4	5	4	14.7	12.8	12.8	48.261	422	422	0	31.733	By MS/MS	By MS/MS	14.7	11.4	34780000	16893000	17886000	16882000	16969000	5	4	9				510	381;1082;2316;3363;5949;6496	True;True;False;True;True;True	398;1137;2410;3501;6230;6794	864;865;2312;5133;5134;7195;7196;13154;13155;14272;14273	836;837;2210;4910;4911;4912;6902;6903;6904;12660;12661;13772	837;2210;4910;6903;12661;13772
SPBC119.10|asn1|II|asparagine	SPBC119.10|asn1|II|asparagine	14	14	14	>SPBC119.10|asn1|II|asparagine synthetase	1	14	14	14	14	13	14	13	14	13	29.4	29.4	29.4	63.24	557	557	0	100.9	By MS/MS	By MS/MS	29.4	26.8	382410000	165800000	216600000	181060000	190100000	13	15	28				511	448;889;1157;2474;2922;3050;3176;3285;4135;4223;5485;5718;6091;6587	True;True;True;True;True;True;True;True;True;True;True;True;True;True	468;935;1214;2572;3040;3179;3310;3422;4328;4423;5742;5993;6381;6890	997;998;1897;1898;2463;2464;5432;6302;6303;6597;6598;6852;6853;7055;7056;9302;9303;9304;9305;9485;9486;12157;12158;12689;12690;13443;13444;14453;14454;14455;14456	966;967;1813;1814;2355;5198;6030;6031;6324;6325;6573;6574;6575;6772;6773;9010;9011;9012;9013;9181;11705;11706;12228;12940;12941;12942;13943;13944;13945;13946	966;1813;2355;5198;6030;6324;6573;6773;9012;9181;11706;12228;12942;13945
SPBC119.17|cym1|II|mitochondrial	SPBC119.17|cym1|II|mitochondrial	2	2	2	>SPBC119.17|cym1|II|mitochondrial metalloendopeptidase (predicted)	1	2	2	2	1	1	1	1	1	1	2.1	2.1	2.1	111.4	992	992	0	11.58	By MS/MS	By MS/MS	0.7	1.4	2501100	0	2501100	0	2371300	1	0	1				512	3764;5627	True;True	3911;5895	7961;12506	7613;12048	7613;12048
SPBC1198.02|dea2|II|adenine	SPBC1198.02|dea2|II|adenine	4	4	4	>SPBC1198.02|dea2|II|adenine deaminase Dea2	1	4	4	4	1	4	1	4	1	4	12	12	12	41.198	367	367	0	28.163	By MS/MS	By MS/MS	1.9	12	11533000	2742900	8790200	0	8333900	1	4	5				513	2079;2165;3758;4897	True;True;True;True	2166;2255;3905;5133	4613;4614;4801;7948;10996	4438;4439;4440;4618;7600;10613	4440;4618;7600;10613
SPBC1198.08|dug1|II|dipeptidase	SPBC1198.08|dug1|II|dipeptidase	1	1	1	>SPBC1198.08|dug1|II|dipeptidase Dug1 (predicted)	1	1	1	1	1	1	1	1	1	1	2.1	2.1	2.1	52.84	476	476	0.0021763	7.4338	By MS/MS	By MS/MS	2.1	2.1	9320400	4734600	4585800	0	4347700	1	1	2				514	6274	TRUE	6567	13785;13786	13274;13275	13275
SPBC11B10.01|alg2|II|mannosyltransferase	SPBC11B10.01|alg2|II|mannosyltransferase	1	1	1	>SPBC11B10.01|alg2|II|mannosyltransferase complex subunit Alg2 (predicted)	1	1	1	1	1	1	1	1	1	1	2	2	2	57.166	506	506	0.0058537	6.2553	By MS/MS	By MS/MS	2	2	2218400	0	2218400	0	2103200	1	1	2				515	3042	TRUE	3171	6580;6581	6306;6307	6306
SPBC11B10.03|cog8|II|Golgi	SPBC11B10.03|cog8|II|Golgi	6	6	6	>SPBC11B10.03|cog8|II|Golgi transport complex subunit Cog8 (predicted)	1	6	6	6	5	5	5	5	5	5	18.8	18.8	18.8	44.08	378	378	0	44.898	By MS/MS	By MS/MS	15.3	15.9	68046000	26978000	41069000	35864000	30050000	3	4	7				516	787;3618;4173;4213;5132;5906	True;True;True;True;True;True	825;3762;4369;4412;5374;6187	1700;7683;7684;9372;9373;9464;11444;11445;13069;13070	1630;7350;9078;9079;9162;11038;11039;12584	1630;7350;9079;9162;11039;12584
SPBC11B10.05c|rsp1|II|random	SPBC11B10.05c|rsp1|II|random	7	7	7	>SPBC11B10.05c|rsp1|II|random septum position protein Rsp1	1	7	7	7	6	7	6	7	6	7	19.6	19.6	19.6	56.288	494	494	0	56.588	By MS/MS	By MS/MS	16	19.6	75646000	30152000	45494000	33466000	39818000	7	8	15				517	888;993;3376;3846;4054;4166;5289	True;True;True;True;True;True;True	934;1043;3515;3995;4247;4361;5536	1894;1895;1896;2115;7221;7222;8143;8144;9155;9156;9360;9361;11749;11750	1809;1810;1811;1812;2025;6928;6929;7783;7784;8871;8872;9066;9067;11318;11319	1809;2025;6928;7784;8871;9067;11319
SPBC11B10.09|cdc2|II|cyclin-dependent	SPBC11B10.09|cdc2|II|cyclin-dependent	6	6	5	>SPBC11B10.09|cdc2|II|cyclin-dependent protein kinase Cdk1/Cdc2	1	6	6	5	3	6	3	6	2	5	17.8	17.8	15.2	34.358	297	297	0	39.469	By MS/MS	By MS/MS	8.8	17.8	48620000	13047000	35574000	19776000	26998000	2	6	8				518	336;391;2432;3021;3370;4849	True;True;True;True;True;True	352;409;2529;3148;3508;5084	782;783;885;5357;6533;6534;7208;7209;10907	764;765;857;5120;6261;6262;6916;6917;10531	765;857;5120;6261;6917;10531
SPBC11C11.02|imp2|II|contractile	SPBC11C11.02|imp2|II|contractile	2	2	2	>SPBC11C11.02|imp2|II|contractile ring protein Imp2	1	2	2	2	2	2	2	2	2	2	4.2	4.2	4.2	75.166	670	670	0	14.562	By MS/MS	By MS/MS	4.2	4.2	8745800	3062300	5683500	3247100	5203600	4	2	6				519	2169;4920	True;True	2259;5158	4808;4809;11040;11041	4624;4625;10651;10652;10653;10654	4625;10654
SPBC1215.02c|naa25|II|NatB	SPBC1215.02c|naa25|II|NatB	14	14	14	>SPBC1215.02c|naa25|II|NatB N-acetyltransferase complex regulatory subunit Naa25	1	14	14	14	11	13	11	13	11	13	23.6	23.6	23.6	92.456	811	811	0	127.59	By MS/MS	By MS/MS	18.2	21.2	120910000	45196000	75710000	50261000	65891000	9	13	22				520	483;1189;1595;1799;1877;3410;3827;3848;4134;4145;4374;4469;5843;6631	True;True;True;True;True;True;True;True;True;True;True;True;True;True	504;1246;1665;1875;1958;3549;3976;3997;4327;4338;4585;4685;6123;6935	1078;2521;3467;3468;4053;4054;4210;4211;7283;7284;8107;8147;8148;8149;9298;9299;9300;9301;9321;9322;9834;9835;10031;10032;12953;14552;14553	1041;2403;3336;3337;3909;4066;4067;6986;6987;7750;7787;7788;9006;9007;9008;9009;9028;9029;9514;9687;9688;12471;14039;14040	1041;2403;3336;3909;4066;6986;7750;7788;9008;9029;9514;9688;12471;14040
SPBC1271.02|stt3|II|oligosaccharyltransferase	SPBC1271.02|stt3|II|oligosaccharyltransferase	3	3	3	>SPBC1271.02|stt3|II|oligosaccharyltransferase subunit Stt3	1	3	3	3	2	3	2	3	2	3	4.8	4.8	4.8	84.973	752	752	0	18.722	By MS/MS	By MS/MS	2.8	4.8	11749000	5962100	5787200	5625100	5823800	2	3	5				521	917;1769;6429	True;True;True	963;1844;6724	1959;1960;3986;3987;14151	1872;1873;3846;3847;13658	1873;3847;13658
SPBC1271.05c|SPBC1271.05c|II|zf-AN1	SPBC1271.05c|SPBC1271.05c|II|zf-AN1	1	1	1	>SPBC1271.05c|SPBC1271.05c|II|zf-AN1 type zinc finger protein	1	1	1	1	1	1	1	1	1	1	5.1	5.1	5.1	24.034	215	215	0.0021906	7.552	By MS/MS	By MS/MS	5.1	5.1	6021200	4330500	1690800	0	1603000	1	1	2				522	5005	TRUE	5244	11207;11208	10811;10812	10811
SPBC1271.12|kes1|II|oxysterol	SPBC1271.12|kes1|II|oxysterol	2	2	2	>SPBC1271.12|kes1|II|oxysterol binding protein (predicted)	1	2	2	2	2	2	2	2	2	2	5.2	5.2	5.2	44.591	388	388	0	11.088	By MS/MS	By MS/MS	5.2	5.2	4531600	2653800	1877800	0	1780300	1	1	2				523	4708;5232	True;True	4933;5476	10616;10617;11633;11634	10244;11209;11210	10244;11210
SPBC1289.03c|spi1|II|Ran	SPBC1289.03c|spi1|II|Ran	6	6	6	>SPBC1289.03c|spi1|II|Ran GTPase Spi1	1	6	6	6	5	5	5	5	5	5	26.4	26.4	26.4	24.555	216	216	0	42.285	By MS/MS	By MS/MS	20.4	21.3	84811000	31821000	52990000	38708000	43353000	3	5	8				524	2171;2172;3785;4160;5097;5791	True;True;True;True;True;True	2261;2262;3933;4355;5337;6067	4812;4813;4814;4815;8011;9351;9352;11373;11374;12843	4628;4629;7662;9057;9058;10965;10966;12371	4628;4629;7662;9058;10965;12371
SPBC1289.06c|ppr8|II|mitochondrial	SPBC1289.06c|ppr8|II|mitochondrial	4	4	4	>SPBC1289.06c|ppr8|II|mitochondrial PPR repeat protein Ppr8	1	4	4	4	4	3	4	3	4	3	9.6	9.6	9.6	54.652	481	481	0	28.67	By MS/MS	By MS/MS	9.6	7.3	32622000	19081000	13541000	17516000	14403000	3	2	5				525	457;1851;3720;5999	True;True;True;True	477;1928;3866;6282	1023;1024;1025;4155;4156;7880;13262;13263	990;991;4005;4006;7535;12767	991;4005;7535;12767
SPBC1289.08|uap1|II|UDP-N-acetylglucosamine	SPBC1289.08|uap1|II|UDP-N-acetylglucosamine	2	2	2	>SPBC1289.08|uap1|II|UDP-N-acetylglucosamine diphosphorylase Uap1/Qri1(predicted)	1	2	2	2	2	2	2	2	2	2	7.4	7.4	7.4	53.121	475	475	0	13.562	By MS/MS	By MS/MS	7.4	7.4	11283000	4656100	6627300	4665400	6274000	2	1	3				526	23;4936	True;True	23;5174	42;43;11072;11073	40;41;10683	41;10683
SPBC1289.10c|adn2|II|transcription	SPBC1289.10c|adn2|II|transcription	4	4	4	>SPBC1289.10c|adn2|II|transcription factor (predicted)	1	4	4	4	4	4	4	4	4	4	3.6	3.6	3.6	81.158	743	743	0	28.822	By MS/MS	By MS/MS	3.6	3.6	21231000	14638000	6593900	14638000	0	4	4	8				527	911;3427;3428;3518	True;True;True;True	957;3566;3567;3660	1948;1949;7315;7316;7317;7318;7488;7489	1862;1863;7016;7017;7018;7019;7175;7176	1862;7016;7018;7176
SPBC1289.16c|cao2|II|copper	SPBC1289.16c|cao2|II|copper	10	10	10	>SPBC1289.16c|cao2|II|copper amine oxidase-like protein Cao2	1	10	10	10	8	10	8	10	8	10	16	16	16	90.126	794	794	0	70.541	By MS/MS	By MS/MS	11.6	16	114150000	43018000	71132000	44923000	65534000	5	9	14				528	557;982;2721;3988;5242;5927;6326;6497;6626;6665	True;True;True;True;True;True;True;True;True;True	581;1030;2833;4177;5486;6208;6620;6795;6930;6969	1217;1218;2086;2087;5918;5919;9001;11650;11651;13109;13110;13887;13888;14274;14545;14546;14623;14624	1170;1171;1998;1999;5660;5661;8724;11225;12619;13376;13377;13773;14033;14108;14109	1170;1999;5661;8724;11225;12619;13376;13773;14033;14108
SPBC12C2.06|dbp5|II|cytoplasmic	SPBC12C2.06|dbp5|II|cytoplasmic	2	2	2	>SPBC12C2.06|dbp5|II|cytoplasmic ATP-dependent RNA helicase Dbp5 (predicted)	1	2	2	2	1	2	1	2	1	2	5.2	5.2	5.2	56.304	503	503	0	11.021	By matching	By MS/MS	3.2	5.2	4257600	1892900	2364700	0	2241900	0	2	2				529	3025;6046	True;True	3152;6330	6541;6542;13348	6269;12851	6269;12851
SPBC12C2.07c|srm1|II|spermidine	SPBC12C2.07c|srm1|II|spermidine	4	4	4	>SPBC12C2.07c|srm1|II|spermidine synthase Srm1 (predicted)	1	4	4	4	4	4	4	4	4	4	16.4	16.4	16.4	33.149	298	298	0	33.44	By MS/MS	By MS/MS	16.4	16.4	41119000	20452000	20667000	21169000	18876000	3	4	7				530	5265;5675;6045;6682	True;True;True;True	5510;5947;6329;6987	11695;11696;12603;12604;13346;13347;14659;14660	11268;11269;12143;12849;12850;14135;14136	11269;12143;12850;14135
SPBC12C2.11|SPBC12C2.11|II|glutamine-fructose-6-phosphate	SPBC12C2.11|SPBC12C2.11|II|glutamine-fructose-6-phosphate	9	9	9	>SPBC12C2.11|SPBC12C2.11|II|glutamine-fructose-6-phosphate transaminase (predicted)	1	9	9	9	7	8	7	8	7	8	18.4	18.4	18.4	77.321	696	696	0	70.689	By MS/MS	By MS/MS	14.7	16.2	66489000	31134000	35356000	31034000	33620000	5	9	14				531	1046;1069;1419;2018;2913;3358;3811;4586;6052	True;True;True;True;True;True;True;True;True	1099;1122;1485;2104;3031;3496;3959;4807;6338	2226;2282;2283;3020;3021;4482;4483;6286;6287;7185;7186;8072;10293;13365;13366	2129;2181;2182;2877;2878;4318;4319;6017;6892;6893;6894;7716;9925;12866	2129;2181;2878;4318;6017;6894;7716;9925;12866
SPBC12D12.03|cct1|II|chaperonin-containing	SPBC12D12.03|cct1|II|chaperonin-containing	12	12	12	>SPBC12D12.03|cct1|II|chaperonin-containing T-complex alpha subunit Cct1	1	12	12	12	8	12	8	12	8	12	30.6	30.6	30.6	60.046	556	556	0	90.198	By MS/MS	By MS/MS	21.4	30.6	93729000	42889000	50840000	51221000	39868000	4	9	13				532	555;1162;1190;1224;1483;1531;2465;2571;3127;4221;5166;6247	True;True;True;True;True;True;True;True;True;True;True;True	579;1219;1247;1283;1551;1600;2563;2673;3258;4421;5409;6540	1214;1215;2472;2473;2522;2523;2604;2605;3140;3233;5417;5622;5623;6743;6744;9482;11511;11512;13737;13738	1168;2363;2404;2405;2473;2995;3079;5183;5377;6467;9178;11097;11098;13229;13230	1168;2363;2405;2473;2995;3079;5183;5377;6467;9178;11098;13229
SPBC12D12.04c|pck2|II|protein	SPBC12D12.04c|pck2|II|protein	7	7	7	>SPBC12D12.04c|pck2|II|protein kinase C (PKC)-like Pck2	1	7	7	7	5	7	5	7	5	7	7.8	7.8	7.8	116	1016	1016	0	54.031	By MS/MS	By MS/MS	6.3	7.8	62828000	26100000	36728000	29463000	31459000	4	7	11				533	1462;2444;2707;2962;3421;4952;6053	True;True;True;True;True;True;True	1529;2541;2819;3081;3560;5190;6339	3103;3104;5379;5380;5894;5895;6377;6378;7302;7303;11109;13367	2959;2960;5146;5635;5636;6101;6102;7004;7005;10716;12867	2960;5146;5635;6102;7005;10716;12867
SPBC1306.02|rtt10|II|WD	SPBC1306.02|rtt10|II|WD	3	3	3	>SPBC1306.02|rtt10|II|WD repeat protein, human WDR6 family, involved in endocytic recycling	1	3	3	3	1	3	1	3	1	3	2.8	2.8	2.8	110.98	984	984	0	16.359	By MS/MS	By MS/MS	0.9	2.8	3931300	1068800	2862500	0	2713900	1	1	2				534	672;2459;4956	True;True;True	705;2557;5194	1475;5408;11113;11114	1423;5173;10720;10721	1423;5173;10721
SPBC13A2.02|nup82|II|nucleoporin;REV__SPAC323.05c|mtq2|I|protein	SPBC13A2.02|nup82|II|nucleoporin	10;1	10;1	10;1	>SPBC13A2.02|nup82|II|nucleoporin Nup82	2	10	10	10	9	10	9	10	9	10	13.3	13.3	13.3	90.611	803	803;231	0	80.076	By MS/MS	By MS/MS	12.5	13.3	124830000	41178000	83656000	44862000	75630000	6	9	15				535	1426;2559;2788;3013;3119;3366;4292;5492;5588;6323	True;True;True;True;True;True;True;True;True;True	1492;2660;2901;3140;3250;3504;4498;5751;5854;6617	3032;3033;5597;6030;6031;6516;6517;6730;6731;7201;7202;9637;9638;12179;12180;12433;12434;13881;13882	2888;2889;5353;5770;5771;6245;6246;6455;6456;6909;6910;9322;9323;11730;11979;13369;13370;13371	2889;5353;5770;6246;6456;6910;9323;11730;11979;13369
SPBC13E7.04|atp16|II|F1-ATPase	SPBC13E7.04|atp16|II|F1-ATPase	1	1	1	>SPBC13E7.04|atp16|II|F1-ATPase delta subunit (predicted)	1	1	1	1	1	0	1	0	1	0	5.4	5.4	5.4	18.41	167	167	0.004985	6.404	By MS/MS	By matching	5.4	0	0	0	0	0	0	1	0	1				536	6166	TRUE	6458	13581	13074	13074
SPBC13G1.02|mpg2|II|mannose-1-phosphate	SPBC13G1.02|mpg2|II|mannose-1-phosphate	13	13	13	>SPBC13G1.02|mpg2|II|mannose-1-phosphate guanyltransferase (predicted)	1	13	13	13	13	12	13	12	13	12	46.1	46.1	46.1	46.096	414	414	0	111.3	By MS/MS	By MS/MS	46.1	40.6	392520000	203620000	188890000	187060000	175700000	11	15	26				537	265;362;548;1133;1260;1529;4237;4682;5311;5833;5897;6110;6127	True;True;True;True;True;True;True;True;True;True;True;True;True	278;378;571;1189;1190;1319;1598;4440;4907;5558;6112;6177;6400;6417	639;640;830;831;1198;1199;1200;1201;2417;2418;2419;2420;2421;2672;2673;3227;3228;3229;3230;9520;10563;10564;11791;11792;12927;12928;13048;13049;13479;13480;13511;13512	621;622;804;805;806;1153;1154;1155;2311;2312;2313;2314;2315;2536;2537;3073;3074;3075;3076;9217;10197;11356;11357;12446;12447;12561;12978;12979;13008;13009	621;804;1153;2312;2536;3076;9217;10197;11356;12446;12561;12979;13009	184;185	37;414
SPBC146.01|med15|II|mediator	SPBC146.01|med15|II|mediator	9	9	9	>SPBC146.01|med15|II|mediator complex subunit Med15	1	9	9	9	8	7	8	7	8	7	10.3	10.3	10.3	118.45	1063	1063	0	101.27	By MS/MS	By MS/MS	9.3	7.8	80428000	40518000	39910000	40500000	35596000	7	5	12				538	846;2006;2629;2895;3035;3306;3582;4427;4576	True;True;True;True;True;True;True;True;True	889;2092;2734;3012;3163;3443;3444;3726;4641;4797	1812;4461;5734;5735;6242;6243;6564;6565;7092;7093;7094;7615;9947;9948;10271;10272	1735;4301;5480;5481;5967;5968;6291;6292;6809;6810;7295;9614;9615;9906;9907	1735;4301;5481;5968;6291;6809;7295;9615;9906	186;187;188;189	127;131;350;395
SPBC146.13c|myo1|II|myosin	SPBC146.13c|myo1|II|myosin	2	2	2	>SPBC146.13c|myo1|II|myosin type I	1	2	2	2	1	2	1	2	1	2	2.2	2.2	2.2	135.71	1217	1217	0	13.835	By MS/MS	By MS/MS	1.6	2.2	6089600	1790700	4298900	0	4075800	1	1	2				539	4967;5368	True;True	5205;5619	11135;11136;11900	10746;10747;11459	10746;11459
SPBC146.14c|sec26|II|coatomer	SPBC146.14c|sec26|II|coatomer	7	7	7	>SPBC146.14c|sec26|II|coatomer beta subunit (predicted)	1	7	7	7	7	5	7	5	7	5	10.2	10.2	10.2	104.7	940	940	0	50.183	By MS/MS	By MS/MS	10.2	6.3	56922000	29840000	27082000	27879000	27637000	4	5	9				540	147;852;2685;3351;4281;4759;5266	True;True;True;True;True;True;True	157;895;2792;3489;4487;4986;5511	412;413;1821;5843;7171;7172;9615;9616;10720;10721;11697;11698;11699;11700;11701	404;1743;5583;6881;9304;10347;11270;11271;11272;11273	404;1743;5583;6881;9304;10347;11272
SPBC14C8.02|tim44|II|TIM23	SPBC14C8.02|tim44|II|TIM23	2	2	2	>SPBC14C8.02|tim44|II|TIM23 translocase complex subunit Tim44 (predicted)	1	2	2	2	0	2	0	2	0	2	6.3	6.3	6.3	48.549	427	427	0	12.411	By matching	By MS/MS	0	6.3	2540200	0	2540200	0	2408300	0	3	3				541	538;5704	True;True	561;5979	1183;12662	1139;12201;12202	1139;12202
SPBC14C8.04|ilv6|II|acetolactate	SPBC14C8.04|ilv6|II|acetolactate	1	1	1	>SPBC14C8.04|ilv6|II|acetolactate synthase regulatory unit Ilv6 (predicted)	1	1	1	1	1	1	1	1	1	1	5.9	5.9	5.9	31.834	289	289	0.0023447	8.7938	By MS/MS	By MS/MS	5.9	5.9	4640400	2914000	1726400	0	1636800	1	1	2				542	444	TRUE	463	985;986	953;954	953
SPBC14C8.06|arc1|II|ARP2/3	SPBC14C8.06|arc1|II|ARP2/3	3	3	3	>SPBC14C8.06|arc1|II|ARP2/3 actin-organizing complex subunit Sop2	1	3	3	3	3	3	3	3	3	3	6.6	6.6	6.6	41.596	377	377	0	23.588	By MS/MS	By MS/MS	6.6	6.6	23996000	14501000	9494700	13682000	9820900	2	1	3				543	481;3661;4595	True;True;True	502;3807;4817	1075;1076;7766;7767;10310;10311	1039;7425;7426;9941;9942	1039;7425;9941
SPBC14F5.03c|kap123|II|karyopherin	SPBC14F5.03c|kap123|II|karyopherin	8	8	8	>SPBC14F5.03c|kap123|II|karyopherin Kap123	1	8	8	8	7	7	7	7	7	7	9.9	9.9	9.9	117.83	1067	1067	0	67.32	By MS/MS	By MS/MS	8	9.2	56837000	22257000	34580000	24383000	28125000	6	8	14				544	302;839;3316;3585;4753;5087;5669;5872	True;True;True;True;True;True;True;True	316;881;882;3454;3729;4979;5327;5941;6152	709;710;1797;1798;1799;1800;7111;7622;7623;10703;10704;11357;11358;12591;13004;13005	694;695;1721;1722;1723;6826;7302;10326;10327;10950;10951;12132;12519;12520	695;1722;6826;7302;10327;10950;12132;12519	190	900
SPBC14F5.04c|pgk1|II|phosphoglycerate	SPBC14F5.04c|pgk1|II|phosphoglycerate	43	43	43	>SPBC14F5.04c|pgk1|II|phosphoglycerate kinase Pgk1 (predicted)	1	43	43	43	41	40	41	40	41	40	86.7	86.7	86.7	43.963	414	414	0	323.31	By MS/MS	By MS/MS	83.6	86.7	3998500000	2019200000	1979200000	2032000000	1813600000	53	55	108				545	53;54;208;293;331;509;510;926;1065;1275;1389;1430;1721;2430;2680;2681;2782;2862;2940;2941;2973;3003;3048;3049;3311;4198;4199;4200;4283;4338;5062;5339;5495;5726;5727;5808;5809;5905;5968;6145;6379;6451;6619	True;True;True;True;True;True;True;True;True;True;True;True;True;True;True;True;True;True;True;True;True;True;True;True;True;True;True;True;True;True;True;True;True;True;True;True;True;True;True;True;True;True;True	54;55;218;219;306;347;531;532;972;1118;1335;1454;1496;1795;2527;2787;2788;2894;2975;3058;3059;3093;3127;3177;3178;3449;4397;4398;4399;4489;4548;5302;5587;5754;6001;6002;6086;6087;6185;6186;6251;6435;6436;6674;6746;6923	104;105;106;107;108;109;519;520;521;522;523;524;525;691;692;774;775;1127;1128;1129;1130;1131;1975;1976;1977;1978;2275;2276;2702;2703;2960;2961;3038;3039;3718;3719;5351;5352;5353;5354;5833;5834;5835;5836;6017;6018;6171;6172;6335;6336;6337;6406;6490;6491;6593;6594;6595;6596;7101;7102;9425;9426;9427;9428;9429;9430;9431;9432;9619;9620;9764;9765;11313;11314;11315;11316;11843;11844;12184;12185;12705;12…	97;98;99;100;101;102;508;509;510;511;512;513;676;677;678;679;755;756;1088;1089;1090;1091;1092;1885;1886;1887;1888;1889;2175;2176;2563;2564;2816;2817;2894;2895;3580;3581;5113;5114;5115;5116;5117;5573;5574;5575;5576;5754;5755;5756;5901;5902;6059;6060;6061;6132;6221;6222;6320;6321;6322;6323;6816;6817;9126;9127;9128;9129;9130;9131;9132;9133;9134;9306;9307;9454;9455;10906;10907;10908;10909;10910;11402…	97;102;509;677;756;1090;1092;1887;2176;2563;2816;2895;3581;5114;5573;5576;5754;5901;6059;6060;6132;6222;6321;6322;6817;9127;9129;9133;9306;9454;10908;11404;11735;12245;12246;12402;12406;12581;12713;13039;13481;13695;14003	191;192;193;194	174;187;237;309
SPBC14F5.05c|sam1|II|S-adenosylmethionine	SPBC14F5.05c|sam1|II|S-adenosylmethionine	9	9	9	>SPBC14F5.05c|sam1|II|S-adenosylmethionine synthetase	1	9	9	9	6	9	6	9	6	9	31.4	31.4	31.4	41.831	382	382	0	73.534	By MS/MS	By MS/MS	21.2	31.4	186080000	73314000	112770000	92113000	88114000	7	8	15				546	1624;4027;4656;4716;4944;5064;5613;5617;5697	True;True;True;True;True;True;True;True;True	1694;4219;4881;4941;5182;5304;5880;5884;5972	3524;3525;9102;9103;10516;10632;10633;11094;11095;11096;11319;12480;12487;12488;12647;12648;12649;12650	3390;3391;3392;8821;8822;10155;10257;10258;10259;10703;10704;10913;12022;12029;12030;12187;12188;12189	3391;8821;10155;10259;10703;10913;12022;12030;12187
SPBC14F5.06|rli1|II|iron-sulfur	SPBC14F5.06|rli1|II|iron-sulfur	5	5	5	>SPBC14F5.06|rli1|II|iron-sulfur ATPase involved in ribosome biogenesis and translation Rli1 (predicted)	1	5	5	5	2	5	2	5	2	5	9.6	9.6	9.6	66.589	593	593	0	34.665	By MS/MS	By MS/MS	3.4	9.6	16700000	7431900	9268500	0	8787300	0	3	3				547	1282;3018;3091;4341;5950	True;True;True;True;True	1342;3145;3222;4551;6231	2720;2721;6529;6676;9770;13156;13157	2578;2579;6258;6402;9460;12662	2578;6258;6402;9460;12662
SPBC14F5.09c|ade8|II|adenylosuccinate	SPBC14F5.09c|ade8|II|adenylosuccinate	2	2	2	>SPBC14F5.09c|ade8|II|adenylosuccinate lyase Ade8	1	2	2	2	2	1	2	1	2	1	5.6	5.6	5.6	54.307	482	482	0	14.154	By MS/MS	By MS/MS	5.6	3.3	5664400	3095300	2569100	3095300	0	2	1	3				548	4505;4544	True;True	4722;4764	10111;10112;10212	9759;9760;9854	9760;9854
SPBC14F5.11c|mug186|II|sorting	SPBC14F5.11c|mug186|II|sorting	2	2	2	>SPBC14F5.11c|mug186|II|sorting nexin Snx41 (predicted)	1	2	2	2	1	2	1	2	1	2	2.7	2.7	2.7	67.001	586	586	0	11.17	By MS/MS	By MS/MS	1.4	2.7	2716200	0	2716200	0	2575200	1	1	2				549	4854;6607	True;True	5089;6911	10916;10917;14499	10538;10539;13984	10538;13984
SPBC1539.04|tts1|II|tetra	SPBC1539.04|tts1|II|tetra	4	4	4	>SPBC1539.04|tts1|II|tetra spanning protein 1, Tts1	1	4	4	4	3	3	3	3	3	3	15.1	15.1	15.1	31.57	279	279	0	24.128	By MS/MS	By MS/MS	12.2	9.7	23681000	13437000	10244000	13437000	0	0	2	2				550	3185;3770;5258;6158	True;True;True;True	3319;3918;5503;6449	6867;7972;7973;11683;13565;13566	6589;7624;11256;13061;13062	6589;7624;11256;13061
SPBC1539.06|acb1|II|fatty-acyl-CoA	SPBC1539.06|acb1|II|fatty-acyl-CoA	1	1	1	>SPBC1539.06|acb1|II|fatty-acyl-CoA binding binding protein Acb1 (predicted)	1	1	1	1	1	0	1	0	1	0	19.5	19.5	19.5	9.838	87	87	0.002331	8.6695	By MS/MS	By matching	19.5	0	0	0	0	0	0	2	0	2				551	4976	TRUE	5214	11156;11157	10764;10765	10765
SPBC1539.09c|trp1|II|anthranilate	SPBC1539.09c|trp1|II|anthranilate	9	9	9	>SPBC1539.09c|trp1|II|anthranilate synthase component II, multifunctional enzyme Trp1	1	9	9	9	8	8	8	8	8	8	12.1	12.1	12.1	83.039	759	759	0	62.296	By MS/MS	By MS/MS	10.7	10.3	37962000	15782000	22180000	17579000	19232000	7	6	13				552	498;1163;1917;2844;3501;3783;4136;5820;6578	True;True;True;True;True;True;True;True;True	519;1220;2001;2957;3643;3931;4329;6099;6880	1104;1105;2474;2475;4281;4282;6134;6135;7460;7461;8007;8008;9306;12907;14432;14433	1066;1067;2364;2365;4136;4137;5866;5867;7149;7150;7658;7659;9014;12427;13924;13925	1066;2365;4137;5867;7149;7659;9014;12427;13925
SPBC15D4.15|pho2|II|4-nitrophenylphosphatase	SPBC15D4.15|pho2|II|4-nitrophenylphosphatase	1	1	1	>SPBC15D4.15|pho2|II|4-nitrophenylphosphatase	1	1	1	1	1	1	1	1	1	1	6	6	6	32.793	298	298	0.0040445	6.5705	By MS/MS	By MS/MS	6	6	6285400	4172400	2113000	0	2003300	1	0	1				553	1459	TRUE	1526	3096;3097	2952;2953	2952
SPBC1604.05|pgi1|II|glucose-6-phosphate	SPBC1604.05|pgi1|II|glucose-6-phosphate	16	16	16	>SPBC1604.05|pgi1|II|glucose-6-phosphate isomerase (predicted)	1	16	16	16	14	13	14	13	14	13	36.2	36.2	36.2	60.883	550	550	0	118.92	By MS/MS	By MS/MS	30.9	31.1	188460000	67504000	120960000	94550000	87635000	13	13	26				554	94;501;564;609;863;965;1495;1534;1535;2082;2601;3329;4143;4295;4880;5403	True;True;True;True;True;True;True;True;True;True;True;True;True;True;True;True	100;522;588;637;907;1013;1563;1603;1604;2169;2705;3467;4336;4501;5115;5656	197;198;1109;1110;1230;1330;1846;1847;2055;2056;3159;3238;3239;3240;4621;4622;5681;5682;7133;7134;9317;9318;9643;9644;10962;10963;11975	187;188;1071;1072;1181;1283;1763;1764;1967;1968;3011;3083;3084;3085;4447;4448;5432;6846;6847;9025;9026;9328;9329;10581;10582;11535	188;1071;1181;1283;1764;1967;3011;3083;3085;4448;5432;6846;9026;9329;10581;11535
SPBC1604.08c|imp1|II|importin	SPBC1604.08c|imp1|II|importin	1	1	1	>SPBC1604.08c|imp1|II|importin alpha	1	1	1	1	1	0	1	0	1	0	1.9	1.9	1.9	59.852	539	539	0.0040568	6.6065	By MS/MS	By matching	1.9	0	0	0	0	0	0	1	0	1				555	1412	TRUE	1477	3007	2864	2864
SPBC1604.12|SPBC1604.12|II|Schizosaccharomyces	SPBC1604.12|SPBC1604.12|II|Schizosaccharomyces	2	2	2	>SPBC1604.12|SPBC1604.12|II|Schizosaccharomyces specific phosphoprotein	1	2	2	2	1	2	1	2	1	2	2.9	2.9	2.9	93.285	860	860	0	11.815	By matching	By MS/MS	1.2	2.9	3571600	868270	2703300	0	2563000	0	2	2				556	3321;4755	True;True	3459;4982	7120;7121;10714	6834;10341	6834;10341
SPBC1604.14c|shk1|II|PAK-related	SPBC1604.14c|shk1|II|PAK-related	3	3	3	>SPBC1604.14c|shk1|II|PAK-related kinase Shk1	1	3	3	3	2	3	2	3	2	3	4.7	4.7	4.7	72.357	658	658	0	21.967	By MS/MS	By MS/MS	3.6	4.7	13814000	5934900	7879200	5934900	0	2	3	5				557	365;4101;4210	True;True;True	381;4294;4409	836;837;9237;9238;9459	811;812;8949;8950;9158	811;8950;9158
SPBC1604.20c|tea2|II|kinesin-like	SPBC1604.20c|tea2|II|kinesin-like	1	1	1	>SPBC1604.20c|tea2|II|kinesin-like protein Tea2	1	1	1	1	1	0	1	0	1	0	1.8	1.8	1.8	70.098	628	628	0.0040527	6.5985	By MS/MS	By matching	1.8	0	0	0	0	0	0	1	0	1				558	5025	TRUE	5264	11242	10843	10843
SPBC1604.21c|ptr3|II|ubiquitin	SPBC1604.21c|ptr3|II|ubiquitin	8	8	8	>SPBC1604.21c|ptr3|II|ubiquitin activating enzyme E1	1	8	8	8	7	7	7	7	7	7	8.6	8.6	8.6	112.95	1012	1012	0	53.721	By MS/MS	By MS/MS	7.7	7.1	36147000	15571000	20576000	17329000	17750000	7	8	15				559	725;1890;2093;2376;2705;4067;5976;6403	True;True;True;True;True;True;True;True	760;1973;2181;2471;2817;4260;6259;6698	1574;1575;4232;4233;4642;4643;5252;5890;5891;9181;9182;13223;13224;14049	1509;1510;4088;4089;4468;4469;5020;5631;5632;8897;8898;8899;12726;12727;13530	1510;4088;4469;5020;5632;8899;12727;13530
SPBC1677.03c|tda1|II|threonine	SPBC1677.03c|tda1|II|threonine	4	4	4	>SPBC1677.03c|tda1|II|threonine ammonia-lyase Tda1	1	4	4	4	3	4	3	4	3	4	10.2	10.2	10.2	66.543	600	600	0	32.587	By MS/MS	By MS/MS	6.3	10.2	35870000	10440000	25430000	13097000	21453000	1	4	5				560	936;3218;3286;3719	True;True;True;True	983;3354;3423;3865	1999;2000;6932;6933;7057;7878;7879	1907;1908;6649;6774;7534	1908;6649;6774;7534
SPBC1683.04|SPBC1683.04|II|glycosyl	SPBC1683.04|SPBC1683.04|II|glycosyl	3	3	3	>SPBC1683.04|SPBC1683.04|II|glycosyl hydrolase family 3 (predicted)	1	3	3	3	3	2	3	2	3	2	3.8	3.8	3.8	93.168	832	832	0	17.102	By MS/MS	By MS/MS	3.8	2.2	7392800	3323100	4069700	0	3858400	2	1	3				561	1294;2564;5520	True;True;True	1354;2665;5781	2742;2743;5606;5607;12242	2597;5362;5363;11788	2597;5363;11788
SPBC1685.02c|rps1202|II|40S	SPBC1685.02c|rps1202|II|40S	2	1	1	>SPBC1685.02c|rps1202|II|40S ribosomal protein S12 (predicted)	1	2	1	1	2	1	1	0	1	0	16.2	10.1	10.1	15.871	148	148	0.0020942	7.0651	By MS/MS	By matching	16.2	6.1	0	0	0	0	0	1	0	1				562	355;3755	False;True	371;3902	815;816;7945	791;7597	791;7597
SPBC1685.09|rps29|II|40S	SPBC1685.09|rps29|II|40S	3	3	3	>SPBC1685.09|rps29|II|40S ribosomal protein S29 (predicted)	1	3	3	3	3	3	3	3	3	3	50	50	50	6.6575	56	56	0	24.34	By MS/MS	By MS/MS	50	50	69934000	16157000	53778000	30294000	36848000	3	3	6				563	192;1251;6456	True;True;True	202;1310;6752	496;497;2656;2657;14202;14203	486;487;2522;2523;13706;13707	487;2523;13707
SPBC1685.10|rps27|II|40S	SPBC1685.10|rps27|II|40S	5	5	5	>SPBC1685.10|rps27|II|40S ribosomal protein S27 (predicted)	1	5	5	5	3	5	3	5	3	5	47	47	47	9.1718	83	83	0	32.584	By MS/MS	By MS/MS	26.5	47	41892000	17461000	24432000	16387000	17016000	3	6	9				564	3482;4542;4840;5979;5980	True;True;True;True;True	3622;4762;5074;5075;6262;6263	7419;7420;10208;10209;10888;10889;10890;10891;13230;13231	7110;7111;9851;9852;10514;10515;10516;10517;12732;12733	7110;9852;10517;12732;12733	195;196	16;33
SPBC1685.15c|klp6|II|kinesin-like	SPBC1685.15c|klp6|II|kinesin-like	10	10	10	>SPBC1685.15c|klp6|II|kinesin-like protein Klp6	1	10	10	10	5	10	5	10	5	10	15.9	15.9	15.9	87.795	784	784	0	71.392	By MS/MS	By MS/MS	7.1	15.9	45674000	8248900	37425000	13412000	30319000	3	10	13				565	397;3186;3760;4675;4858;4947;5014;5248;5395;5982	True;True;True;True;True;True;True;True;True;True	415;3320;3907;4900;5093;5185;5253;5493;5646;6265	895;6868;6869;7951;7952;10553;10923;11101;11222;11223;11667;11668;11949;11950;13234	866;6590;7605;10188;10544;10709;10825;10826;11240;11241;11506;11507;12736	866;6590;7605;10188;10544;10709;10826;11240;11507;12736
SPBC16A3.05c|rae1|II|RNA	SPBC16A3.05c|rae1|II|RNA	2	2	2	>SPBC16A3.05c|rae1|II|RNA export factor, nucleoporin Rae1	1	2	2	2	2	2	2	2	2	2	5.7	5.7	5.7	38.626	352	352	0.0023753	10.401	By MS/MS	By matching	5.7	5.7	16696000	6776500	9919300	6807200	9373700	2	0	2				566	3063;4581	True;True	3192;4802	6621;6622;10280;10281	6350;9915	6350;9915
SPBC16A3.15c|nda2|II|tubulin	SPBC16A3.15c|nda2|II|tubulin	7	7	3	>SPBC16A3.15c|nda2|II|tubulin alpha 1	1	7	7	3	6	7	6	7	2	3	21.8	21.8	12.1	51.152	455	455	0	64.595	By MS/MS	By MS/MS	18.7	21.8	73555000	29135000	44420000	44246000	25244000	6	9	15				567	932;1278;3292;4120;4195;5477;6552	True;True;True;True;True;True;True	979;1338;3429;4313;4394;5732;6852	1991;1992;1993;2710;2711;2712;2713;7068;7069;9275;9419;9420;12136;12137;14376;14377	1900;1901;1902;2571;2572;2573;6785;6786;8984;9120;9121;11685;13869;13870;13871	1902;2572;6786;8984;9121;11685;13870
SPBC16C6.07c|rpt1|II|19S	SPBC16C6.07c|rpt1|II|19S	5	5	5	>SPBC16C6.07c|rpt1|II|19S proteasome regulatory subunit Rpt1 (predicted)	1	5	5	5	4	5	4	5	4	5	13	13	13	48.965	438	438	0	34.362	By MS/MS	By MS/MS	11	13	28708000	13683000	15026000	12300000	15629000	2	4	6				568	1181;1626;3601;4001;5076	True;True;True;True;True	1238;1696;3745;4190;5316	2506;2507;3528;3529;7652;7653;9021;9022;11339	2392;3394;3395;7325;8744;8745;10932	2392;3394;7325;8745;10932
SPBC16C6.11|rpl3201|II|60S;SPAC3H5.10|rpl3202|I|60S	SPBC16C6.11|rpl3201|II|60S;SPAC3H5.10|rpl3202|I|60S	4;2	4;2	4;2	>SPBC16C6.11|rpl3201|II|60S ribosomal protein L32;>SPAC3H5.10|rpl3202|I|60S ribosomal protein L32 (predicted)	2	4	4	4	3	4	3	4	3	4	32.3	32.3	32.3	14.445	127	127;127	0	26.276	By MS/MS	By MS/MS	26	32.3	71254000	34790000	36464000	26799000	26423000	6	6	12				569	18;4307;5706;6395	True;True;True;True	18;4515;4516;5981;6690	33;34;9695;9696;9697;9698;9699;9700;9701;12665;12666;14028	32;33;9383;9384;9385;9386;9387;9388;9389;12204;12205;13512	32;9383;12205;13512	197	84
SPBC16C6.13c|sec27|II|coatomer	SPBC16C6.13c|sec27|II|coatomer	17	17	17	>SPBC16C6.13c|sec27|II|coatomer beta subunit (predicted)	1	17	17	17	9	16	9	16	9	16	32.9	32.9	32.9	89.802	796	796	0	142.79	By MS/MS	By MS/MS	16.7	31.2	156370000	43250000	113120000	71070000	79429000	8	15	23				570	281;364;495;880;1329;1502;1676;1986;2293;2817;2942;3113;3535;3612;4836;6358;6656	True;True;True;True;True;True;True;True;True;True;True;True;True;True;True;True;True	294;380;516;925;1389;1570;1749;2072;2385;2930;3060;3244;3679;3756;5070;6653;6960	667;834;835;1099;1879;2814;3177;3624;3625;4423;5088;6082;6083;6338;6339;6720;6721;7528;7529;7674;10882;10883;13959;13960;14608	652;809;810;1062;1795;2663;3028;3484;3485;4264;4869;5816;5817;5818;6062;6063;6444;6445;7216;7217;7342;10509;10510;13445;14096	652;809;1062;1795;2663;3028;3485;4264;4869;5818;6063;6445;7217;7342;10509;13445;14096
SPBC16D10.06|zrt1|II|ZIP	SPBC16D10.06|zrt1|II|ZIP	8	8	8	>SPBC16D10.06|zrt1|II|ZIP zinc transmembrane transporter Zrt1	1	8	8	8	5	8	5	8	5	8	31.1	31.1	31.1	45.271	408	408	0	95.288	By MS/MS	By MS/MS	20.1	31.1	357990000	123290000	234700000	107920000	156660000	7	15	22				571	626;1369;3040;3155;3156;4229;5515;6437	True;True;True;True;True;True;True;True	657;1431;1432;3168;3169;3286;3287;4432;5776;6732	1372;2892;2893;2894;2895;2896;2897;2898;2899;6573;6574;6575;6576;6577;6791;6792;6793;9508;12233;12234;14164;14165	1323;1324;1325;2752;2753;2754;2755;2756;2757;2758;6300;6301;6302;6303;6304;6508;6509;6510;6511;9206;11781;13670;13671	1324;2758;6300;6510;6511;9206;11781;13670	198;199	170;304
SPBC16D10.08c|hsp104|II|heat	SPBC16D10.08c|hsp104|II|heat	38	38	38	>SPBC16D10.08c|hsp104|II|heat shock protein Hsp104	1	38	38	38	36	34	36	34	36	34	49.8	49.8	49.8	100.51	905	905	0	323.31	By MS/MS	By MS/MS	46.4	45.6	474140000	251200000	222940000	262070000	197180000	37	31	68				572	26;81;123;177;272;361;744;816;887;1154;1519;1586;1700;2352;2394;2477;2732;2761;2836;3274;3304;3462;3976;4005;4050;4051;4192;4614;4664;4677;4678;4686;4690;4706;5016;6354;6430;6676	True;True;True;True;True;True;True;True;True;True;True;True;True;True;True;True;True;True;True;True;True;True;True;True;True;True;True;True;True;True;True;True;True;True;True;True;True;True	26;85;131;187;285;377;779;855;933;1211;1587;1656;1773;2446;2489;2575;2844;2873;2949;3411;3441;3602;4165;4195;4242;4243;4391;4836;4889;4902;4903;4911;4915;4931;5255;6649;6725;6980	47;48;168;367;368;468;651;652;828;829;1613;1614;1750;1751;1892;1893;2457;2458;3206;3207;3450;3451;3677;3678;5199;5200;5283;5437;5438;5935;5936;5980;5981;6116;6117;7034;7089;7090;7384;7385;8723;8724;9031;9032;9147;9148;9414;9415;10429;10430;10532;10533;10556;10557;10558;10559;10571;10572;10573;10574;10575;10576;10582;10583;10610;10611;10612;10613;11226;11227;13952;13953;14152;14153;14646;14647	45;46;160;359;360;459;633;634;802;803;1548;1680;1681;1807;1808;2351;2352;3055;3056;3318;3319;3539;3540;4970;4971;4972;5049;5203;5204;5676;5677;5717;5848;5849;5850;6747;6806;6807;7079;7080;8377;8378;8754;8864;8865;9117;10069;10070;10168;10169;10191;10192;10193;10203;10204;10205;10206;10207;10214;10215;10241;10242;10829;10830;13438;13439;13659;13660;14127	46;160;359;459;634;802;1548;1681;1807;2351;3056;3318;3539;4972;5049;5204;5676;5717;5849;6747;6807;7080;8377;8754;8864;8865;9117;10070;10168;10192;10193;10206;10215;10242;10830;13438;13659;14127
SPCC1259.01c|rps1802|III|40S;SPBC16D10.11c|rps1801|II|40S	SPCC1259.01c|rps1802|III|40S;SPBC16D10.11c|rps1801|II|40S	6;6	6;6	6;6	>SPCC1259.01c|rps1802|III|40S ribosomal protein S18 (predicted);>SPBC16D10.11c|rps1801|II|40S ribosomal protein S18 (predicted)	2	6	6	6	6	6	6	6	6	6	40.1	40.1	40.1	17.435	152	152;152	0	57.799	By MS/MS	By MS/MS	40.1	40.1	224290000	84806000	139480000	95841000	111790000	5	8	13				573	161;2659;2807;3435;4864;6051	True;True;True;True;True;True	171;2765;2920;3574;5099;6336;6337	438;439;5786;5787;6064;6065;7330;7331;10932;10933;13360;13361;13362;13363;13364	429;430;431;5528;5529;5799;5800;7031;7032;10553;10554;12862;12863;12864;12865	431;5528;5800;7032;10554;12863	200;201	27;30
SPBC16E9.05|erg6|II|sterol	SPBC16E9.05|erg6|II|sterol	3	3	3	>SPBC16E9.05|erg6|II|sterol 24-C-methyltransferase Erg6	1	3	3	3	1	3	1	3	1	3	6.9	6.9	6.9	42.867	378	378	0	19.135	By MS/MS	By MS/MS	2.1	6.9	5257700	2666500	2591200	0	2456700	1	3	4				574	2062;5882;6628	True;True;True	2149;6162;6932	4580;4581;13025;14549	4408;4409;12538;14036	4409;12538;14036
SPBC16E9.14c|zrg17|II|cation	SPBC16E9.14c|zrg17|II|cation	4	4	4	>SPBC16E9.14c|zrg17|II|cation diffusion family zinc transmembrane transporter Zrg17	1	4	4	4	3	4	3	4	3	4	11.7	11.7	11.7	43.089	386	386	0	26.686	By MS/MS	By MS/MS	8.8	11.7	14401000	2720200	11681000	0	11075000	2	2	4				575	1198;1203;4558;6300	True;True;True;True	1256;1261;4779;6594	2542;2556;2557;10238;10239;13837;13838	2420;2432;2433;9878;9879;13326	2420;2432;9878;13326
SPBC16G5.05c|scs2|II|VAP	SPBC16G5.05c|scs2|II|VAP	2	2	2	>SPBC16G5.05c|scs2|II|VAP family protein Scs2	1	2	2	2	2	2	2	2	2	2	8.6	8.6	8.6	41.234	383	383	0	13.76	By MS/MS	By MS/MS	8.6	8.6	25762000	10359000	15404000	0	14604000	2	1	3				576	673;1095	True;True	706;1150	1476;1477;2336;2337	1424;2232;2233;2234	1424;2232
SPBC16G5.14c|rps3|II|40S	SPBC16G5.14c|rps3|II|40S	12	12	12	>SPBC16G5.14c|rps3|II|40S ribosomal protein S3 (predicted)	1	12	12	12	11	12	11	12	11	12	53.8	53.8	53.8	27.553	249	249	0	100.67	By MS/MS	By MS/MS	51	53.8	320820000	159010000	161820000	144400000	118230000	12	14	26				577	46;469;1116;1120;1268;1273;1591;1669;2613;3364;5033;6655	True;True;True;True;True;True;True;True;True;True;True;True	47;489;1171;1175;1327;1328;1333;1661;1742;2718;3502;5273;6959	91;92;1050;1051;1052;1053;2376;2377;2385;2386;2684;2685;2686;2687;2698;2699;3459;3460;3612;3613;5706;7197;7198;11259;11260;14606;14607	85;86;1013;1014;1015;1016;2272;2273;2280;2281;2548;2549;2550;2560;2561;3328;3329;3473;3474;5453;6905;6906;10860;10861;14094;14095	86;1015;2273;2280;2550;2560;3329;3473;5453;6905;10861;14094	202	159
SPBC16H5.02|pfk1|II|6-phosphofructokinase	SPBC16H5.02|pfk1|II|6-phosphofructokinase	49	49	49	>SPBC16H5.02|pfk1|II|6-phosphofructokinase pfk1	1	49	49	49	44	47	44	47	44	47	67.9	67.9	67.9	102.55	942	942	0	323.31	By MS/MS	By MS/MS	58.8	67.8	3308500000	1532500000	1776000000	1487700000	1474800000	51	62	113				578	139;185;251;370;460;776;788;824;939;1668;1729;1736;1752;1944;2045;2057;2173;2311;2317;2323;2947;2955;2963;2967;2972;3708;3709;3794;4140;4420;4534;4718;4804;4813;4814;5170;5334;5751;5767;5794;5868;6088;6193;6283;6284;6343;6562;6563;6586	True;True;True;True;True;True;True;True;True;True;True;True;True;True;True;True;True;True;True;True;True;True;True;True;True;True;True;True;True;True;True;True;True;True;True;True;True;True;True;True;True;True;True;True;True;True;True;True;True	147;148;195;263;387;480;813;814;826;863;864;986;1740;1741;1803;1810;1826;2030;2132;2144;2263;2403;2404;2405;2411;2417;3065;3073;3082;3087;3092;3854;3855;3942;4333;4634;4754;4943;5037;5046;5047;5413;5582;6026;6027;6043;6070;6148;6378;6485;6577;6578;6638;6863;6864;6889	394;395;396;481;482;605;606;845;846;1032;1033;1676;1677;1678;1679;1680;1681;1701;1702;1763;1764;1765;1766;2005;3609;3610;3611;3734;3735;3747;3748;3826;3827;4339;4340;4547;4548;4549;4570;4571;4572;4816;5121;5122;5123;5124;5125;5135;5136;5137;5146;6349;6350;6363;6364;6379;6395;6396;6404;6405;7853;7854;7855;7856;7857;7858;7859;7860;8032;8033;9312;9313;9933;10190;10191;10635;10636;10820;10821;10837;1…	385;386;387;470;471;588;589;819;820;998;1608;1609;1610;1611;1612;1613;1631;1690;1691;1692;1693;1914;3470;3471;3472;3594;3595;3608;3683;3684;4188;4189;4190;4375;4376;4377;4398;4399;4400;4401;4630;4900;4901;4902;4903;4913;4914;4922;6073;6074;6075;6076;6087;6103;6118;6130;6131;7509;7510;7511;7512;7513;7514;7515;7516;7517;7681;7682;9020;9021;9602;9836;9837;10261;10262;10446;10447;10464;10465;10466;10…	385;471;588;819;998;1612;1631;1691;1914;3472;3594;3608;3684;4189;4375;4401;4630;4901;4913;4922;6073;6087;6103;6118;6131;7512;7517;7682;9020;9602;9836;10262;10447;10466;10467;11105;11393;12287;12315;12377;12512;12934;13123;13293;13297;13411;13886;13891;13941	203;204;205;206;207;208;209	200;209;243;387;598;662;928
SPBC16H5.08c|SPBC16H5.08c|II|ribosome	SPBC16H5.08c|SPBC16H5.08c|II|ribosome	8	8	8	>SPBC16H5.08c|SPBC16H5.08c|II|ribosome biogenesis ATPase, Arb family ABCF2-like (predicted)	1	8	8	8	6	8	6	8	6	8	17.2	17.2	17.2	69.212	618	618	0	111.66	By MS/MS	By MS/MS	12.6	17.2	86225000	30888000	55336000	36987000	46365000	5	8	13				579	758;1368;1397;2356;3406;4431;5198;5212	True;True;True;True;True;True;True;True	793;1430;1462;2450;3545;4645;5442;5456	1642;1643;2891;2976;2977;5208;5209;7275;9954;9955;11567;11568;11592;11593	1575;1576;2751;2833;2834;4979;4980;6980;9620;11146;11147;11171;11172	1576;2751;2833;4979;6980;9620;11147;11171
SPBC16H5.12c|SPBC16H5.12c|II|conserved	SPBC16H5.12c|SPBC16H5.12c|II|conserved	3	3	3	>SPBC16H5.12c|SPBC16H5.12c|II|conserved fungal protein	1	3	3	3	3	2	3	2	3	2	3.8	3.8	3.8	82.52	737	737	0	17.024	By MS/MS	By MS/MS	3.8	2.7	11646000	6492900	5152600	6492900	0	1	1	2				580	2142;2410;2529	True;True;True	2232;2505;2629	4750;4751;5313;5314;5544	4568;5075;5076;5304	4568;5076;5304
SPBC1703.07|acl1|II|ATP	SPBC1703.07|acl1|II|ATP	22	22	22	>SPBC1703.07|acl1|II|ATP citrate synthase subunit 1 (predicted)	1	22	22	22	19	21	19	21	19	21	46.3	46.3	46.3	67.203	615	615	0	323.31	By MS/MS	By MS/MS	39.7	44.4	850260000	454040000	396220000	449820000	376700000	17	20	37				581	155;544;579;734;893;1034;1035;1363;1909;1973;2198;2953;3331;3375;3538;4771;4941;4942;5379;5690;5848;6577	True;True;True;True;True;True;True;True;True;True;True;True;True;True;True;True;True;True;True;True;True;True	165;567;603;769;939;1085;1086;1425;1992;2059;2289;3071;3469;3514;3682;4998;4999;5179;5180;5630;5965;6128;6879	428;1191;1192;1258;1593;1594;1906;1907;2203;2204;2205;2206;2882;4264;4265;4398;4399;4900;4901;6359;6360;7137;7138;7219;7220;7533;7534;10742;10743;10744;11086;11087;11088;11089;11090;11091;11918;11919;12636;12637;12961;14430;14431	418;1146;1147;1207;1528;1529;1821;1822;2109;2110;2111;2741;4122;4123;4239;4240;4708;4709;6084;6085;6850;6851;6926;6927;7221;7222;10369;10370;10371;10695;10696;10697;10698;10699;10700;11474;11475;12174;12175;12479;13922;13923	418;1146;1207;1528;1821;2110;2111;2741;4122;4239;4708;6084;6850;6927;7221;10369;10695;10697;11475;12175;12479;13923	210	106
SPBC1703.10|ypt1|II|GTPase	SPBC1703.10|ypt1|II|GTPase	3	3	2	>SPBC1703.10|ypt1|II|GTPase Ypt1	1	3	3	2	3	3	3	3	2	2	17.2	17.2	11.8	22.816	203	203	0	20.286	By MS/MS	By MS/MS	17.2	17.2	27106000	12552000	14554000	11898000	14453000	2	2	4				582	951;3417;4633	True;True;True	998;3556;4856	2027;2028;7295;7296;10465;10466	1937;1938;6998;10105	1938;6998;10105
SPBC1703.12|ubp9|II|ubiquitin	SPBC1703.12|ubp9|II|ubiquitin	2	2	2	>SPBC1703.12|ubp9|II|ubiquitin C-terminal hydrolase Ubp9	1	2	2	2	0	2	0	2	0	2	2.7	2.7	2.7	66.788	585	585	0	11.543	By matching	By MS/MS	0	2.7	3880600	0	3880600	0	3679200	0	3	3				583	1756;4842	True;True	1830;5077	3834;10894	3690;3691;10520	3691;10520
SPBC1703.13c|SPBC1703.13c|II|mitochondrial	SPBC1703.13c|SPBC1703.13c|II|mitochondrial	5	5	5	>SPBC1703.13c|SPBC1703.13c|II|mitochondrial inorganic phosphate transmembrane transporter (predicted)	1	5	5	5	5	3	5	3	5	3	18	18	18	33.843	311	311	0	38.898	By MS/MS	By MS/MS	18	11.3	79800000	36224000	43575000	34104000	43434000	6	3	9				584	1810;2775;2808;4624;6450	True;True;True;True;True	1886;2887;2921;4847;6745	4073;4074;6007;6066;6067;10450;10451;14186	3925;3926;5742;5801;5802;10089;10090;10091;13693	3926;5742;5802;10091;13693
SPBC1703.15c|vps33|II|HOPS/CORVET	SPBC1703.15c|vps33|II|HOPS/CORVET	2	2	2	>SPBC1703.15c|vps33|II|HOPS/CORVET complex subunit, vacuolar sorting protein Vps33	1	2	2	2	1	2	1	2	1	2	2.9	2.9	2.9	67.599	592	592	0	15.692	By MS/MS	By MS/MS	1.2	2.9	9326900	3320300	6006600	0	4699700	2	3	5				585	3911;5190	True;True	4078;4079;5433	8425;8426;8427;8428;11552	8067;8068;8069;8070;11136	8068;11136	211	184
SPBC1709.02c|vrs1|II|cytoplasmic	SPBC1709.02c|vrs1|II|cytoplasmic	10	10	10	>SPBC1709.02c|vrs1|II|cytoplasmic valine-tRNA ligase Vrs1/Vas1	1	10	10	10	8	9	8	9	8	9	12	12	12	111.32	980	980	0	77.069	By MS/MS	By MS/MS	9.2	10.7	60122000	25151000	34971000	28966000	29340000	7	8	15				586	532;749;2302;3277;3343;4022;4596;4883;5538;6534	True;True;True;True;True;True;True;True;True;True	555;784;2394;3414;3481;4214;4818;5118;5800;6832	1172;1173;1623;1624;5103;5104;7038;7039;7159;7160;9094;10312;10313;10970;12289;14337;14338	1129;1130;1558;1559;4884;4885;6751;6752;6870;8814;9943;9944;10590;11839;13832;13833	1129;1558;4884;6752;6870;8814;9944;10590;11839;13832
SPBC1709.05|sks2|II|heat	SPBC1709.05|sks2|II|heat	34	34	34	>SPBC1709.05|sks2|II|heat shock protein, ribosome associated molecular chaperone Sks2	1	34	34	34	33	32	33	32	33	32	68	68	68	67.205	613	613	0	323.31	By MS/MS	By MS/MS	66.7	68	6799900000	3325400000	3474600000	3362900000	3010700000	53	55	108				587	76;80;419;470;511;604;1319;1893;2339;2363;2500;2672;2673;2676;2677;2964;3799;4269;4273;4274;4296;4434;4487;4714;4743;4961;4980;5127;5401;5662;5934;6060;6419;6420	True;True;True;True;True;True;True;True;True;True;True;True;True;True;True;True;True;True;True;True;True;True;True;True;True;True;True;True;True;True;True;True;True;True	80;84;438;490;533;631;1379;1976;2433;2457;2458;2599;2778;2779;2780;2783;2784;3083;3084;3947;4475;4479;4480;4502;4648;4649;4704;4939;4969;5199;5218;5219;5367;5368;5369;5654;5934;6215;6346;6714;6715	153;154;161;162;163;164;165;166;167;934;935;936;937;1054;1132;1133;1134;1135;1317;1318;2787;4236;4237;4238;4239;5176;5177;5222;5223;5224;5225;5481;5482;5813;5814;5815;5816;5817;5818;5819;5820;5825;5826;5827;5828;6380;6381;6382;6383;6384;6385;6386;6387;6388;6389;6390;6391;8041;8042;8043;8044;8045;9592;9593;9594;9595;9601;9602;9603;9645;9646;9647;9648;9649;9650;9959;9960;9961;9962;10073;10074;10075…	146;147;153;154;155;156;157;158;159;902;903;904;905;1017;1093;1094;1095;1267;1268;2636;4092;4093;4094;4095;4096;4949;4950;4993;4994;4995;4996;4997;5245;5246;5552;5553;5554;5555;5556;5557;5558;5564;5565;5566;5567;5568;6104;6105;6106;6107;6108;6109;6110;6111;6112;6113;6114;7689;7690;7691;7692;9283;9284;9285;9286;9290;9291;9292;9330;9331;9332;9333;9334;9624;9625;9626;9627;9729;9730;9731;10255;10305;…	146;159;902;1017;1095;1267;2636;4094;4950;4995;5245;5553;5556;5566;5567;6106;7692;9284;9290;9291;9330;9627;9731;10255;10305;10735;10773;11026;11532;12117;12631;12877;13640;13641	212;213;214;215;216	124;521;562;563;581
SPBC1709.12|rid1|II|GTPase	SPBC1709.12|rid1|II|GTPase	1	1	1	>SPBC1709.12|rid1|II|GTPase binding protein Rid1 (predicted)	1	1	1	1	0	1	0	1	0	1	3	3	3	46.4	400	400	0.0022173	7.6573	By matching	By MS/MS	0	3	4585100	0	4585100	0	4347100	0	1	1				588	1242	TRUE	1301	2638	2503	2503
SPBC1711.06|rpl401|II|60S	SPBC1711.06|rpl401|II|60S	6	2	2	>SPBC1711.06|rpl401|II|60S ribosomal protein L4 (predicted)	1	6	2	2	6	5	2	2	2	2	23.7	9.6	9.6	39.91	363	363	0	16.755	By MS/MS	By MS/MS	23.7	19.8	16343000	8167700	8175500	8254500	7664300	2	2	4				589	169;668;3328;3515;4090;6375	False;True;False;False;False;True	179;700;3466;3657;4283;6670	454;1467;1468;7131;7132;7483;7484;9219;9220;13990;13991	444;1415;1416;6844;6845;7170;7171;8932;8933;13472;13473	444;1415;6844;7171;8932;13473
SPBC1711.13|his2|II|histidinol	SPBC1711.13|his2|II|histidinol	12	12	12	>SPBC1711.13|his2|II|histidinol dehydrogenase His2 (predicted)	1	12	12	12	10	12	10	12	10	12	33.5	33.5	33.5	47.553	439	439	0	95.528	By MS/MS	By MS/MS	31	33.5	318310000	134410000	183900000	138140000	170630000	9	13	22				590	0;392;671;1683;2408;2424;3030;3256;5142;5494;5743;6506	True;True;True;True;True;True;True;True;True;True;True;True	0;410;704;1756;2503;2521;3158;3393;5385;5753;6018;6804	0;886;887;1473;1474;3637;3638;5309;5310;5341;5342;6552;6553;6554;6555;7003;7004;11467;12182;12183;12736;12737;14287;14288	0;858;859;1421;1422;3496;3497;5071;5072;5103;5104;5105;6279;6280;6281;6282;6717;6718;11057;11732;11733;12271;13784;13785	0;859;1422;3497;5072;5105;6281;6718;11057;11732;12271;13785
SPBC1734.04|anp1|II|mannosyltransferase	SPBC1734.04|anp1|II|mannosyltransferase	1	1	1	>SPBC1734.04|anp1|II|mannosyltransferase complex subunit, Anp family (predicted)	1	1	1	1	1	1	1	1	1	1	3	3	3	48.99	430	430	0.0022371	7.7446	By MS/MS	By MS/MS	3	3	2181100	983740	1197300	0	1135200	1	1	2				591	639	TRUE	670	1402;1403	1354;1355	1355
SPBC1734.08|hse1|II|STAM	SPBC1734.08|hse1|II|STAM	5	5	5	>SPBC1734.08|hse1|II|STAM like protein Hse1	1	5	5	5	5	2	5	2	5	2	15.3	15.3	15.3	42.497	373	373	0	36.118	By MS/MS	By MS/MS	15.3	4.8	20048000	14093000	5955800	10005000	9734200	5	2	7				592	2912;3135;5398;6215;6473	True;True;True;True;True	3030;3266;5649;6508;6771	6285;6757;11955;11956;13681;13682;14239	6016;6480;11511;11512;13178;13179;13739	6016;6480;11512;13179;13739
SPBC1734.11|mas5|II|DNAJ	SPBC1734.11|mas5|II|DNAJ	13	13	13	>SPBC1734.11|mas5|II|DNAJ domain protein Mas5 (predicted)	1	13	13	13	13	13	13	13	13	13	43.2	43.2	43.2	44.821	407	407	0	219.16	By MS/MS	By MS/MS	43.2	43.2	1083900000	520480000	563440000	495180000	527030000	18	17	35				593	368;546;770;1395;2106;2781;2902;3837;3838;4878;6025;6184;6337	True;True;True;True;True;True;True;True;True;True;True;True;True	384;385;569;806;1460;2195;2893;3019;3986;3987;5113;6308;6309;6476;6631	841;842;843;1194;1195;1663;1664;2972;2973;4674;4675;4676;4677;4678;6015;6016;6259;6260;6261;6262;8122;8123;8124;8125;8126;10958;10959;13308;13309;13310;13311;13614;13615;13909;13910	815;816;817;1149;1150;1594;1595;2826;2827;2828;2829;4498;4499;4500;4501;4502;4503;5750;5751;5752;5753;5981;5982;5983;7762;7763;7764;7765;10577;10578;12810;12811;12812;12813;13108;13109;13397;13398	816;1150;1595;2826;4499;5752;5981;7762;7764;10578;12811;13108;13398	217;218	171;310
SPBC1734.13|atp3|II|F1-ATPase	SPBC1734.13|atp3|II|F1-ATPase	2	2	2	>SPBC1734.13|atp3|II|F1-ATPase gamma subunit (predicted)	1	2	2	2	1	2	1	2	1	2	8.6	8.6	8.6	33.577	301	301	0	14.678	By MS/MS	By MS/MS	6.3	8.6	8847500	4404800	4442700	0	4212000	1	2	3				594	1541;4382	True;True	1610;4594	3250;9853;9854	3095;9532;9533	3095;9533
SPBC1734.16c|pst3|II|SIN3	SPBC1734.16c|pst3|II|SIN3	2	2	2	>SPBC1734.16c|pst3|II|SIN3 family co-repressor Pst3	1	2	2	2	1	1	1	1	1	1	1.8	1.8	1.8	132.88	1154	1154	0	13.492	By MS/MS	By MS/MS	1	0.8	1818100	0	1818100	0	1723700	1	1	2				595	1439;5119	True;True	1505;5359	3057;11418	2915;11009	2915;11009
SPBC1773.01|far8|II|SIP/FAR	SPBC1773.01|far8|II|SIP/FAR	9	9	9	>SPBC1773.01|far8|II|SIP/FAR complex striatin subunit, Far8/Csc3	1	9	9	9	7	9	7	9	7	9	22.4	22.4	22.4	69.494	612	612	0	83.425	By MS/MS	By MS/MS	16.8	22.4	63902000	29328000	34574000	33117000	28991000	5	8	13				596	67;468;674;1631;1874;2277;2279;4395;6154	True;True;True;True;True;True;True;True;True	68;488;707;1701;1954;2369;2371;4608;6445	133;1048;1049;1478;1479;3536;3537;4203;4204;5059;5060;5063;9881;9882;13557;13558	127;1011;1012;1425;1426;3400;3401;4057;4058;4843;4844;4846;9560;13052;13053;13054	127;1011;1425;3400;4057;4844;4846;9560;13053
SPBC1773.06c|adh8|II|alcohol	SPBC1773.06c|adh8|II|alcohol	13	13	13	>SPBC1773.06c|adh8|II|alcohol dehydrogenase (predicted)	1	13	13	13	13	9	13	9	13	9	43.6	43.6	43.6	37.32	346	346	0	91.813	By MS/MS	By MS/MS	43.6	25.1	105970000	88536000	17436000	86374000	18693000	13	4	17				597	38;688;919;1770;1856;2925;3220;3521;5533;5600;5884;6388;6664	True;True;True;True;True;True;True;True;True;True;True;True;True	38;721;965;1845;1933;3043;3356;3664;5795;5867;6164;6683;6968	71;72;1504;1963;1964;3988;3989;4165;6307;6308;6936;6937;7495;7496;12280;12281;12455;12456;13028;14014;14015;14016;14017;14622	68;1448;1875;3848;3849;4013;6035;6652;7182;7183;11827;11998;12541;13498;13499;13500;13501;14107	68;1448;1875;3848;4013;6035;6652;7182;11827;11998;12541;13498;14107
SPBC1773.09c|mug184|II|Hsp70	SPBC1773.09c|mug184|II|Hsp70	3	3	3	>SPBC1773.09c|mug184|II|Hsp70 protein binding protein Mug184	1	3	3	3	0	3	0	3	0	3	10.5	10.5	10.5	63.757	551	551	0	24.542	By matching	By MS/MS	0	10.5	13453000	0	13453000	0	12755000	0	4	4				598	3574;5153;5597	True;True;True	3718;5396;5863	7601;11483;11484;12448	7282;11071;11072;11991	7282;11072;11991
SPBC1773.10c|nrs1|II|cytoplasmic	SPBC1773.10c|nrs1|II|cytoplasmic	9	9	9	>SPBC1773.10c|nrs1|II|cytoplasmic asparagine-tRNA ligase Nrs1 (predicted)	1	9	9	9	6	8	6	8	6	8	19	19	19	63.869	568	568	0	65.193	By MS/MS	By MS/MS	12	17.1	63519000	28148000	35371000	30996000	30686000	6	7	13				599	669;1356;1427;1779;2281;3490;3683;3954;5316	True;True;True;True;True;True;True;True;True	701;1418;1493;1855;2373;3632;3829;4136;5563	1469;2871;3034;3035;4007;5066;5067;7438;7439;7440;7807;7808;8662;11800;11801	1417;2730;2890;2891;3865;4849;4850;7130;7131;7464;7465;8321;11364;11365	1417;2730;2890;3865;4849;7131;7465;8321;11364	219	447
SPBC1778.01c|zuo1|II|zuotin	SPBC1778.01c|zuo1|II|zuotin	3	3	3	>SPBC1778.01c|zuo1|II|zuotin (predicted)	1	3	3	3	3	1	3	1	3	1	9.3	9.3	9.3	50.209	442	442	0	19.646	By MS/MS	By matching	9.3	3.8	8836100	7522100	1314100	7522100	0	3	0	3				600	3228;4171;4562	True;True;True	3364;4367;4783	6948;6949;9369;10247	6663;9075;9885	6663;9075;9885
SPBC1778.06c|fim1|II|fimbrin	SPBC1778.06c|fim1|II|fimbrin	3	3	3	>SPBC1778.06c|fim1|II|fimbrin	1	3	3	3	3	2	3	2	3	2	6.5	6.5	6.5	68.617	614	614	0	21.008	By MS/MS	By MS/MS	6.5	4.7	11554000	7829400	3724600	7829400	0	3	2	5				601	1925;2341;3377	True;True;True	2009;2435;3516	4297;4298;5179;7223;7224	4150;4151;4952;6930;6931	4150;4952;6930
SPBC17A3.04c|rar1|II|cytoplasmic	SPBC17A3.04c|rar1|II|cytoplasmic	25	25	25	>SPBC17A3.04c|rar1|II|cytoplasmic methionine-tRNA ligase Mrs1 (predicted)	1	25	25	25	22	22	22	22	22	22	39	39	39	88.88	782	782	0	182.77	By MS/MS	By MS/MS	34.5	35.5	401920000	206850000	195070000	189250000	196520000	15	16	31				602	286;785;847;927;1262;1872;1965;2188;2230;2332;2433;3062;3639;4403;4490;4525;4591;4969;5518;5641;6121;6147;6315;6660;6681	True;True;True;True;True;True;True;True;True;True;True;True;True;True;True;True;True;True;True;True;True;True;True;True;True	299;823;890;973;1321;1952;2051;2279;2321;2426;2530;3191;3784;4617;4707;4744;4812;5207;5779;5911;6411;6438;6609;6964;6985;6986	677;1696;1697;1813;1979;1980;2675;2676;4200;4381;4382;4879;4880;4969;4970;5162;5163;5358;5359;6619;6620;7723;9896;9897;9898;10081;10082;10149;10150;10301;10302;11138;11139;12239;12532;13500;13501;13546;13547;13865;13866;14615;14616;14656;14657;14658	662;1626;1627;1736;1890;2539;2540;4054;4225;4226;4690;4691;4767;4937;4938;5121;5122;6348;6349;7386;9572;9573;9736;9794;9932;9933;10749;10750;11785;12073;12999;13000;13042;13043;13353;14101;14102;14133;14134	662;1626;1736;1890;2540;4054;4225;4691;4767;4938;5121;6349;7386;9572;9736;9794;9932;10749;11785;12073;13000;13042;13353;14102;14133	220	590
SPBC17A3.07|pgr1|II|mitochondrial	SPBC17A3.07|pgr1|II|mitochondrial	3	3	3	>SPBC17A3.07|pgr1|II|mitochondrial glutathione reductase Pgr1	1	3	3	3	3	2	3	2	3	2	8.8	8.8	8.8	49.999	464	464	0	18.532	By MS/MS	By MS/MS	8.8	6.5	10748000	6965900	3781700	6965900	0	2	1	3				603	2618;3151;5847	True;True;True	2723;3282;6127	5714;6784;6785;12959;12960	5461;6503;12477;12478	5461;6503;12478
SPBC17D11.01|nep1|II|NEDD8	SPBC17D11.01|nep1|II|NEDD8	5	5	5	>SPBC17D11.01|nep1|II|NEDD8 protease Nep1	1	5	5	5	5	4	5	4	5	4	19.5	19.5	19.5	47.257	420	420	0	53.233	By MS/MS	By MS/MS	19.5	11.4	50889000	26737000	24152000	25049000	24586000	5	4	9				604	584;4355;6140;6143;6526	True;True;True;True;True	608;4566;6430;6433;6824	1266;1267;9796;9797;13533;13534;13538;14322;14323	1215;1216;9485;9486;13030;13031;13035;13817;13818	1216;9485;13030;13035;13817
SPBC17D11.05|tif32|II|translation	SPBC17D11.05|tif32|II|translation	24	24	24	>SPBC17D11.05|tif32|II|translation initiation factor eIF3a	1	24	24	24	21	24	21	24	21	24	31.1	31.1	31.1	107.07	932	932	0	191.95	By MS/MS	By MS/MS	26.9	31.1	334180000	157080000	177100000	160690000	164300000	21	24	45				605	4;363;375;897;1309;1402;1481;1730;1892;1981;2075;2076;3032;3059;3206;3502;3632;3998;4561;4933;5050;5151;5680;6443	True;True;True;True;True;True;True;True;True;True;True;True;True;True;True;True;True;True;True;True;True;True;True;True	4;379;392;943;1369;1467;1549;1804;1975;2067;2162;2163;3160;3188;3341;3644;3777;4187;4782;5171;5290;5394;5952;6738	6;7;832;833;853;854;1914;1915;2769;2770;2988;2989;3136;3137;3736;3737;4235;4413;4414;4606;4607;4608;4609;6558;6559;6615;6616;6908;6909;7462;7463;7709;7710;7711;9015;9016;10245;10246;11064;11065;11066;11067;11291;11481;12613;12614;14174;14175	6;807;808;826;827;1830;1831;2620;2621;2846;2847;2991;2992;3596;3597;3598;4091;4253;4254;4432;4433;4434;4435;6284;6285;6286;6344;6345;6625;6626;7151;7375;7376;8738;8739;9884;10675;10676;10677;10678;10887;11069;12150;12151;13680;13681	6;808;827;1831;2620;2847;2992;3596;4091;4253;4433;4434;6285;6345;6626;7151;7375;8738;9884;10676;10887;11069;12150;13680	221	528
SPBC17D11.07c|rpn2|II|19S	SPBC17D11.07c|rpn2|II|19S	3	3	3	>SPBC17D11.07c|rpn2|II|19S proteasome regulatory subunit Rpn2 (predicted)	1	3	3	3	3	2	3	2	3	2	4	4	4	107.28	965	965	0	20.294	By MS/MS	By MS/MS	4	3	16165000	6536200	9628600	0	9128700	2	1	3				606	3221;3757;4311	True;True;True	3357;3904;4520	6938;6939;7947;9707;9708	6653;6654;7599;9393;9394	6653;7599;9393
SPBC17F3.02|nak1|II|PAK-related	SPBC17F3.02|nak1|II|PAK-related	7	7	7	>SPBC17F3.02|nak1|II|PAK-related kinase Nak1	1	7	7	7	5	6	5	6	5	6	14.4	14.4	14.4	71.119	652	652	0	51.794	By MS/MS	By MS/MS	8.4	13	35906000	11135000	24771000	14646000	19974000	3	5	8				607	200;535;1218;1409;2573;3950;4989	True;True;True;True;True;True;True	210;558;1276;1474;2676;4130;5228	508;1177;2587;2588;3001;3002;5627;5628;8649;8650;11180	497;1134;2459;2858;2859;5380;8309;8310;10786	497;1134;2459;2859;5380;8310;10786
SPBC17G9.03c|krs1|II|cytoplasmic	SPBC17G9.03c|krs1|II|cytoplasmic	11	11	11	>SPBC17G9.03c|krs1|II|cytoplasmic lysine-tRNA ligase Krs1 (predicted)	1	11	11	11	7	9	7	9	7	9	20.5	20.5	20.5	67.493	591	591	0	70.675	By MS/MS	By MS/MS	12.4	17.8	43971000	18986000	24985000	21085000	21589000	7	8	15				608	62;357;1019;1525;1632;2295;3786;3923;6106;6301;6522	True;True;True;True;True;True;True;True;True;True;True	63;373;1069;1594;1702;2387;3934;4094;6396;6595;6820	122;123;820;2175;3220;3221;3538;5091;8012;8013;8454;13472;13473;13839;13840;14317	117;118;794;2083;3068;3069;3402;4872;7663;7664;8089;12970;12971;13327;13328;13812	117;794;2083;3069;3402;4872;7664;8089;12971;13328;13812
SPBC17G9.08c|cnt5|II|Centaurin	SPBC17G9.08c|cnt5|II|Centaurin	3	3	3	>SPBC17G9.08c|cnt5|II|Centaurin Cnt5	1	3	3	3	3	2	3	2	3	2	3.2	3.2	3.2	99.081	870	870	0	18.755	By MS/MS	By MS/MS	3.2	2.3	7167700	4176600	2991100	4179900	2832600	3	2	5				609	471;4444;5416	True;True;True	491;4660;5669	1055;9985;9986;11997;11998	1018;9646;9647;11557;11558	1018;9646;11557
SPBC17G9.09|tif213|II|translation	SPBC17G9.09|tif213|II|translation	8	8	8	>SPBC17G9.09|tif213|II|translation initiation factor eIF2 gamma subunit	1	8	8	8	6	8	6	8	6	8	24.7	24.7	24.7	48.78	446	446	0	71.483	By MS/MS	By MS/MS	19.1	24.7	79568000	40463000	39105000	38537000	39001000	5	6	11				610	103;1740;1950;2122;3769;4023;4838;6556	True;True;True;True;True;True;True;True	109;1814;2036;2211;3917;4215;5072;6857	212;213;3753;3754;4350;4351;4710;4711;7971;9095;10885;10886;14385;14386	203;204;3613;3614;4197;4198;4533;4534;7623;8815;10512;13876;13877	204;3613;4198;4533;7623;8815;10512;13876
SPBC17G9.11c|pyr1|II|pyruvate	SPBC17G9.11c|pyr1|II|pyruvate	38	38	38	>SPBC17G9.11c|pyr1|II|pyruvate carboxylase Pyr1	1	38	38	38	36	37	36	37	36	37	38.1	38.1	38.1	130.86	1185	1185	0	301.59	By MS/MS	By MS/MS	37.3	36.8	634280000	286530000	347750000	288140000	310500000	32	34	66				611	16;184;592;608;1021;1249;1255;1348;1457;1458;1512;1513;1593;1698;1824;1935;2257;3109;3367;3391;3411;3413;3477;3608;3795;3964;4377;4735;4806;4824;5407;5561;5845;5846;5904;6192;6449;6559	True;True;True;True;True;True;True;True;True;True;True;True;True;True;True;True;True;True;True;True;True;True;True;True;True;True;True;True;True;True;True;True;True;True;True;True;True;True	16;194;617;636;1071;1308;1314;1410;1524;1525;1580;1581;1663;1771;1901;2021;2349;3240;3505;3530;3550;3552;3617;3752;3943;4149;4150;4588;4961;5039;5057;5058;5660;5825;6125;6126;6184;6484;6744;6860	29;30;479;480;1281;1282;1328;1329;2178;2179;2652;2653;2663;2855;2856;3092;3093;3094;3095;3193;3194;3195;3196;3463;3464;3673;3674;4103;4104;4320;4321;5026;5027;6710;6711;7203;7204;7248;7249;7285;7286;7289;7290;7412;7413;7666;7667;8034;8035;8690;8691;8692;8693;9840;9841;10668;10669;10824;10858;10859;10860;10861;11980;11981;12360;12361;12956;12957;12958;13063;13064;13628;13629;14184;14185;14391;14392	28;29;469;1229;1281;1282;2086;2087;2518;2519;2529;2715;2948;2949;2950;2951;3045;3046;3047;3332;3333;3535;3536;3956;3957;4170;4171;4816;6436;6437;6911;6912;6955;6988;6989;6992;6993;7104;7105;7335;7336;7683;7684;8346;8347;8348;8349;9519;9520;10292;10293;10450;10487;10488;10489;10490;11540;11541;11910;11911;12474;12475;12476;12577;13121;13122;13691;13692;13881;13882	28;469;1229;1282;2086;2518;2529;2715;2948;2950;3045;3047;3332;3536;3956;4170;4816;6437;6912;6955;6989;6993;7105;7336;7684;8348;9520;10292;10450;10487;11540;11910;12474;12476;12577;13122;13691;13882	222;223	527;739
SPBC1815.01|eno101|II|enolase	SPBC1815.01|eno101|II|enolase	22	22	22	>SPBC1815.01|eno101|II|enolase (predicted)	1	22	22	22	22	22	22	22	22	22	66.1	66.1	66.1	47.435	439	439	0	323.31	By MS/MS	By MS/MS	66.1	66.1	3078600000	1557400000	1521200000	1383600000	1457400000	35	36	71				612	2;109;110;257;377;506;562;1871;2368;2442;2443;3008;3215;3742;3743;3953;4882;6081;6310;6466;6483;6579	True;True;True;True;True;True;True;True;True;True;True;True;True;True;True;True;True;True;True;True;True;True	2;115;116;269;270;394;527;586;1951;2463;2539;2540;3133;3134;3350;3351;3889;3890;4133;4134;4135;5117;6371;6604;6764;6781;6881;6882	2;3;224;225;226;227;617;618;619;620;857;858;1119;1120;1227;1228;4196;4197;4198;4199;5234;5235;5236;5237;5238;5374;5375;5376;5377;5378;6500;6501;6502;6924;6925;6926;6927;7918;7919;7920;7921;8655;8656;8657;8658;8659;8660;8661;10966;10967;10968;10969;13423;13424;13854;13855;13856;13857;14225;14226;14254;14255;14434;14435;14436;14437	2;3;213;214;215;599;600;601;602;830;831;1081;1082;1178;1179;4046;4047;4048;4049;4050;4051;4052;4053;5005;5006;5007;5008;5140;5141;5142;5143;5144;5145;6230;6231;6232;6641;6642;6643;6644;7573;7574;7575;7576;8313;8314;8315;8316;8317;8318;8319;8320;10585;10586;10587;10588;10589;12922;12923;13343;13344;13345;13726;13727;13728;13752;13753;13926;13927;13928;13929	2;213;215;602;831;1081;1178;4048;5008;5141;5143;6232;6641;7573;7575;8313;10586;12923;13345;13727;13753;13929	224;225;226;227;228	49;116;309;361;370
SPBC1861.02|abp2|II|ARS	SPBC1861.02|abp2|II|ARS	1	1	1	>SPBC1861.02|abp2|II|ARS binding protein Abp2	1	1	1	1	1	1	1	1	1	1	1.7	1.7	1.7	59.628	527	527	0.0021209	7.2065	By MS/MS	By MS/MS	1.7	1.7	7464600	3252200	4212400	0	3993700	1	1	2				613	3768	TRUE	3916	7969;7970	7621;7622	7621
SPBC18E5.01|SPBC18E5.01|II|cycloisomerase	SPBC18E5.01|SPBC18E5.01|II|cycloisomerase	4	4	4	>SPBC18E5.01|SPBC18E5.01|II|cycloisomerase 2 family	1	4	4	4	3	4	3	4	3	4	25.7	25.7	25.7	38.22	342	342	0	40.625	By MS/MS	By MS/MS	20.2	25.7	63690000	28321000	35369000	26784000	28736000	5	5	10				614	1503;1539;1664;4968	True;True;True;True	1571;1608;1735;1736;5206	3178;3179;3246;3247;3599;3600;3601;3602;11137	3029;3030;3031;3091;3092;3461;3462;3463;3464;10748	3030;3091;3461;10748	229	301
SPBC18E5.02c|lcb1|II|serine	SPBC18E5.02c|lcb1|II|serine	2	2	2	>SPBC18E5.02c|lcb1|II|serine palmitoyltransferase complex subunit (predicted)	1	2	2	2	1	1	1	1	1	1	5.1	5.1	5.1	57.468	509	509	0	14.662	By MS/MS	By MS/MS	2	3.1	4068200	1721600	2346600	0	2224800	1	1	2				615	679;1345	True;True	712;1407	1488;2851	1434;2711	1434;2711
SPBC18E5.04|rpl1001|II|60S	SPBC18E5.04|rpl1001|II|60S	7	1	1	>SPBC18E5.04|rpl1001|II|60S ribosomal protein L10	1	7	1	1	7	7	1	1	1	1	44.3	5	5	25.373	221	221	0	10.777	By MS/MS	By MS/MS	44.3	44.3	107950000	56249000	51700000	0	25632000	3	3	6				616	188;455;1687;1920;2035;6067;6312	False;False;False;False;False;True;False	198;475;1760;2004;2122;6353;6354;6606	486;487;1019;1020;3656;3657;4287;4288;4527;4528;13388;13389;13390;13391;13392;13393;13859;13860	475;476;986;987;3519;3520;4142;4359;4360;12887;12888;12889;12890;12891;12892;13348;13349	475;986;3519;4142;4359;12890;13349	230	136
SPBC18E5.06|rps21|II|40S	SPBC18E5.06|rps21|II|40S	2	2	2	>SPBC18E5.06|rps21|II|40S ribosomal protein S21	1	2	2	2	2	2	2	2	2	2	29.9	29.9	29.9	9.6166	87	87	0	16.034	By MS/MS	By MS/MS	29.9	29.9	47562000	26023000	21539000	26229000	20215000	2	2	4				617	3735;5665	True;True	3882;5937	7907;7908;12584;12585	7563;7564;12125;12126	7564;12125
SPBC18E5.11c|edc3|II|enhancer	SPBC18E5.11c|edc3|II|enhancer	1	1	1	>SPBC18E5.11c|edc3|II|enhancer of mRNA decapping Edc3	1	1	1	1	0	1	0	1	0	1	5.7	5.7	5.7	49.218	454	454	0	14.278	By matching	By MS/MS	0	5.7	7657700	0	7657700	0	7260200	0	1	1				618	5635	TRUE	5905	12523	12066	12066
SPBC18E5.12c|mas2|II|mitochondrial	SPBC18E5.12c|mas2|II|mitochondrial	2	2	2	>SPBC18E5.12c|mas2|II|mitochondrial processing peptidase(MPP) complex alpha subunit Mas2 (predicted)	1	2	2	2	1	2	1	2	1	2	4.2	4.2	4.2	55.577	502	502	0	11.371	By matching	By MS/MS	2.2	4.2	4913300	1169300	3744000	0	3549600	0	2	2				619	2324;2668	True;True	2418;2774	5147;5148;5804	4923;5545	4923;5545
SPBC18H10.02|lcf1|II|long-chain-fatty-acid-CoA	SPBC18H10.02|lcf1|II|long-chain-fatty-acid-CoA	7	7	7	>SPBC18H10.02|lcf1|II|long-chain-fatty-acid-CoA ligase Lcf1	1	7	7	7	6	7	6	7	6	7	11.4	11.4	11.4	75.965	676	676	0	46.27	By MS/MS	By MS/MS	9.9	11.4	63136000	27288000	35848000	27915000	33361000	5	3	8				620	1005;1184;1861;4181;4543;5410;5975	True;True;True;True;True;True;True	1055;1241;1940;4379;4763;5663;6258	2142;2143;2511;2512;4174;9393;9394;10210;10211;11986;11987;13221;13222	2051;2395;2396;4021;9098;9099;9853;11546;11547;12725	2051;2395;4021;9098;9853;11546;12725
SPBC18H10.03|tif35|II|translation	SPBC18H10.03|tif35|II|translation	6	6	6	>SPBC18H10.03|tif35|II|translation initiation factor eIF3g	1	6	6	6	2	6	2	6	2	6	23	23	23	31.494	282	282	0	37.691	By MS/MS	By MS/MS	8.9	23	29553000	3197300	26355000	11536000	16648000	0	5	5				621	802;1696;1697;1865;6191;6485	True;True;True;True;True;True	840;1769;1770;1944;6483;6783	1724;1725;3671;3672;4180;4181;13627;14257	1654;1655;3533;3534;4027;4028;13120;13756	1655;3533;3534;4028;13120;13756
SPBC18H10.04c|sce3|II|translation	SPBC18H10.04c|sce3|II|translation	3	3	3	>SPBC18H10.04c|sce3|II|translation initiation factor (predicted)	1	3	3	3	3	2	3	2	3	2	10.1	10.1	10.1	42.513	388	388	0	23.655	By MS/MS	By matching	10.1	4.1	22162000	11469000	10694000	12480000	9127400	3	0	3				622	2764;3776;5585	True;True;True	2876;3924;5851	5986;5987;7996;7997;12429	5722;7649;11976	5722;7649;11976
SPBC18H10.08c|ubp4|II|ubiquitin	SPBC18H10.08c|ubp4|II|ubiquitin	2	2	2	>SPBC18H10.08c|ubp4|II|ubiquitin C-terminal hydrolase Ubp4	1	2	2	2	2	2	2	2	2	2	3.7	3.7	3.7	67.746	593	593	0	15.414	By MS/MS	By MS/MS	3.7	3.7	11295000	4369600	6925700	0	6566200	1	1	2				623	3543;4033	True;True	3687;4225	7543;7544;9116;9117;9118	7230;8835;8836	7230;8836
SPBC18H10.12c|rpl701|II|60S	SPBC18H10.12c|rpl701|II|60S	5	5	4	>SPBC18H10.12c|rpl701|II|60S ribosomal protein L7	1	5	5	4	4	5	4	5	3	4	22.7	22.7	18.7	28.73	251	251	0	32.897	By MS/MS	By MS/MS	18.7	22.7	25711000	13659000	12052000	13259000	11826000	4	4	8				624	1160;2074;2290;3333;4654	True;True;True;True;True	1217;2161;2382;3471;4879	2468;2469;4604;4605;5082;5083;7140;7141;10514	2359;2360;4431;4865;4866;6853;6854;10153	2359;4431;4866;6853;10153
SPBC1921.01c|rpl35b|II|60S	SPBC1921.01c|rpl35b|II|60S	1	1	1	>SPBC1921.01c|rpl35b|II|60S ribosomal protein L35a (predicted)	1	1	1	1	1	1	1	1	1	1	10.2	10.2	10.2	12.187	108	108	0.0022962	8.2044	By MS/MS	By MS/MS	10.2	10.2	31886000	17595000	14292000	0	7409200	2	1	3				625	2236	TRUE	2327	4981;4982;4983;4984	4776;4777;4778	4777
SPBC1921.05|ape2|II|aminopeptidase	SPBC1921.05|ape2|II|aminopeptidase	9	9	9	>SPBC1921.05|ape2|II|aminopeptidase Ape2 (predicted)	1	9	9	9	8	9	8	9	8	9	12.6	12.6	12.6	99.445	882	882	0	63.432	By MS/MS	By MS/MS	11.6	12.6	71336000	39510000	31826000	39166000	30518000	5	9	14				626	174;337;1339;1470;4761;5274;5508;6160;6648	True;True;True;True;True;True;True;True;True	184;353;1399;1537;4988;5519;5769;6452;6952	462;463;784;785;2835;2836;3115;3116;10723;10724;11717;11718;12216;12217;13570;14587;14588	452;453;766;2695;2970;2971;2972;10349;10350;11287;11765;11766;13066;14074	453;766;2695;2972;10349;11287;11765;13066;14074
SPBC19C2.07|fba1|II|fructose-bisphosphate	SPBC19C2.07|fba1|II|fructose-bisphosphate	15	15	15	>SPBC19C2.07|fba1|II|fructose-bisphosphate aldolase Fba1	1	15	15	15	13	15	13	15	13	15	61.7	61.7	61.7	39.57	358	358	0	229.97	By MS/MS	By MS/MS	56.7	61.7	1146200000	537540000	608700000	539270000	536220000	18	20	38				627	433;1006;1118;1119;1780;2458;2927;3443;3583;4720;5106;5661;6065;6066;6262	True;True;True;True;True;True;True;True;True;True;True;True;True;True;True	452;1056;1173;1174;1856;2555;2556;3045;3582;3583;3727;4945;5346;5933;6351;6352;6555	964;965;966;2144;2145;2146;2147;2148;2379;2380;2381;2382;2383;2384;4008;4009;5404;5405;5406;5407;6311;7346;7347;7616;7617;7618;7619;10639;10640;11392;11393;11394;11395;12572;12573;12574;12575;13384;13385;13386;13387;13764;13765	932;933;934;2052;2053;2054;2055;2056;2057;2058;2275;2276;2277;2278;2279;3866;3867;5169;5170;5171;5172;6037;7045;7046;7296;7297;7298;7299;10265;10266;10984;10985;10986;10987;12114;12115;12116;12883;12884;12885;12886;13255;13256	934;2057;2275;2278;3866;5170;6037;7045;7298;10266;10987;12114;12884;12886;13255	231;232	121;141
SPBC19C2.10|SPBC19C2.10|II|BAR	SPBC19C2.10|SPBC19C2.10|II|BAR	1	1	1	>SPBC19C2.10|SPBC19C2.10|II|BAR adaptor protein, human endophilin-A2 ortholog, implicated in endocytosis	1	1	1	1	0	1	0	1	0	1	2.4	2.4	2.4	56.732	501	501	0.0021598	7.3642	By matching	By MS/MS	0	2.4	0	0	0	0	0	0	1	1				628	6609	TRUE	6913	14502	13987	13987
SPBC19C7.02|ubr1|II|N-end-recognizing	SPBC19C7.02|ubr1|II|N-end-recognizing	4	4	4	>SPBC19C7.02|ubr1|II|N-end-recognizing protein, UBR ubiquitin-protein ligase E3 Ubr1	1	4	4	4	4	4	4	4	4	4	2.2	2.2	2.2	225.76	1958	1958	0	33.62	By MS/MS	By MS/MS	2.2	2.2	10846000	4067000	6778700	4701800	5792000	4	4	8				629	1544;3046;3064;4174	True;True;True;True	1613;3175;3193;4370	3254;3255;6588;6589;6623;6624;9374;9375	3099;3100;6314;6315;6351;6352;9080;9081	3099;6314;6351;9080
SPBC19C7.06|prs1|II|cytoplasmic	SPBC19C7.06|prs1|II|cytoplasmic	9	9	9	>SPBC19C7.06|prs1|II|cytoplasmic proline-tRNA ligase Prs1 (predicted)	1	9	9	9	7	9	7	9	7	9	18.3	18.3	18.3	78.874	716	716	0	68.692	By MS/MS	By MS/MS	10.9	18.3	87614000	37420000	50195000	40943000	42879000	4	8	12				630	187;598;1537;2833;3212;4055;5250;5676;6261	True;True;True;True;True;True;True;True;True	197;624;1606;2946;3347;4248;5495;5948;6554	485;1303;1304;3243;3244;6112;6113;6918;6919;9157;9158;11670;12605;12606;12607;12608;13762;13763	474;1253;3088;3089;5844;5845;6635;6636;8873;8874;11243;12144;12145;13253;13254	474;1253;3088;5845;6635;8874;11243;12144;13253	233	317
SPBC19F5.03|sac11|II|inositol	SPBC19F5.03|sac11|II|inositol	2	2	2	>SPBC19F5.03|sac11|II|inositol polyphosphate phosphatase (predicted)	1	2	2	2	2	2	2	2	2	2	2.8	2.8	2.8	68.712	598	598	0	12.418	By MS/MS	By MS/MS	2.8	2.8	9710000	4198600	5511400	0	5225300	1	1	2				631	3420;5487	True;True	3559;5744	7300;7301;12160;12161	7002;7003;11708;11709	7003;11708
SPBC19F5.04|SPBC19F5.04|II|aspartate	SPBC19F5.04|SPBC19F5.04|II|aspartate	3	3	3	>SPBC19F5.04|SPBC19F5.04|II|aspartate kinase (predicted)	1	3	3	3	3	1	3	1	3	1	9.2	9.2	9.2	56.812	519	519	0	17.534	By MS/MS	By MS/MS	9.2	2.1	15011000	11516000	3495300	11516000	0	2	1	3				632	795;1952;3265	True;True;True	833;2038;3402	1712;4356;4357;7020	1641;4203;4204;6733	1641;4204;6733
SPBC19G7.01c|msh2|II|MutS	SPBC19G7.01c|msh2|II|MutS	5	5	5	>SPBC19G7.01c|msh2|II|MutS protein homolog 2	1	5	5	5	2	5	2	5	2	5	5.7	5.7	5.7	109.74	982	982	0	31.488	By MS/MS	By MS/MS	2.3	5.7	14140000	5394600	8745700	7645400	6041000	2	5	7				633	1905;2495;4518;4672;4848	True;True;True;True;True	1988;2594;4736;4897;5083	4257;5473;5474;10136;10137;10548;10906	4115;5237;5238;9781;9782;10184;10530	4115;5238;9782;10184;10530
SPBC19G7.14c|cog5|II|Golgi	SPBC19G7.14c|cog5|II|Golgi	6	6	6	>SPBC19G7.14c|cog5|II|Golgi transport complex subunit Cog5 (predicted)	1	6	6	6	4	5	4	5	4	5	18.5	18.5	18.5	47.518	411	411	0	52.226	By MS/MS	By MS/MS	12.2	15.1	43834000	32427000	11407000	22620000	20622000	3	5	8				634	1318;3201;4475;6179;6533;6685	True;True;True;True;True;True	1378;3336;4691;6471;6831;6990	2785;2786;6901;10042;10043;13605;13606;14336;14665	2634;2635;6619;9699;9700;13100;13101;13831;14141	2635;6619;9700;13100;13831;14141
SPBC19G7.15|nup44|II|nucleoporin	SPBC19G7.15|nup44|II|nucleoporin	13	13	13	>SPBC19G7.15|nup44|II|nucleoporin Nup44	1	13	13	13	13	13	13	13	13	13	33.5	33.5	33.5	44.483	403	403	0	136.87	By MS/MS	By MS/MS	33.5	33.5	280420000	152100000	128320000	144370000	123670000	11	10	21				635	675;2011;2012;2053;2634;2751;3487;3499;3655;4233;4540;5029;6296	True;True;True;True;True;True;True;True;True;True;True;True;True	708;2097;2098;2140;2739;2740;2863;3629;3641;3801;4436;4760;5269;6590	1480;1481;4469;4470;4471;4472;4562;4563;5741;5742;5743;5966;5967;7433;7434;7457;7458;7756;7757;9513;9514;10204;10205;11251;11252;13828;13829	1427;1428;4307;4308;4309;4310;4389;4390;5487;5488;5703;5704;7125;7126;7146;7147;7416;7417;9211;9849;10851;10852;13316;13317;13318	1427;4308;4309;4389;5488;5703;7126;7146;7416;9211;9849;10851;13316	234	232
SPBC1A4.02c|leu1|II|3-isopropylmalate	SPBC1A4.02c|leu1|II|3-isopropylmalate	19	19	19	>SPBC1A4.02c|leu1|II|3-isopropylmalate dehydrogenase Leu1	1	19	19	19	17	18	17	18	17	18	63.3	63.3	63.3	39.732	371	371	0	258.03	By MS/MS	By MS/MS	60.1	61.5	1137700000	529190000	608550000	528760000	534040000	18	25	43				636	386;530;531;727;884;1121;1804;2412;2810;2985;3016;3142;4219;5077;5366;5915;5983;6454;6622	True;True;True;True;True;True;True;True;True;True;True;True;True;True;True;True;True;True;True	403;553;554;762;930;1176;1880;2507;2923;3106;3143;3273;4418;4419;5317;5616;5617;6196;6266;6750;6926	873;874;1168;1169;1170;1171;1578;1579;1886;1887;2387;2388;4063;4064;5317;5318;6070;6071;6444;6445;6525;6526;6769;9475;9476;9477;9478;9479;9480;11340;11341;11895;11896;11897;11898;13085;13086;13235;14196;14197;14525;14526	844;845;1125;1126;1127;1128;1513;1514;1515;1802;1803;2282;2283;3917;3918;5078;5079;5080;5805;5806;6167;6168;6254;6255;6490;9172;9173;9174;9175;9176;10933;10934;11452;11453;11454;11455;11456;11457;12598;12599;12737;13702;14007;14008	844;1125;1127;1513;1802;2282;3918;5079;5806;6168;6254;6490;9176;10934;11457;12598;12737;13702;14007	235;236	156;228
SPBC1A4.05|blt1|II|ubiquitin	SPBC1A4.05|blt1|II|ubiquitin	3	3	3	>SPBC1A4.05|blt1|II|ubiquitin domain-like protein Blt1	1	3	3	3	2	3	2	3	2	3	4.7	4.7	4.7	78.116	700	700	0	17.949	By MS/MS	By MS/MS	3.3	4.7	5746200	0	5746200	0	5447900	2	3	5				637	1390;2635;3528	True;True;True	1455;2741;3672	2962;2963;5744;7515;7516	2818;2819;5489;7204;7205	2818;5489;7204
SPBC1A4.08c|cct3|II|chaperonin-containing	SPBC1A4.08c|cct3|II|chaperonin-containing	22	22	22	>SPBC1A4.08c|cct3|II|chaperonin-containing T-complex gamma subunit Cct3	1	22	22	22	18	22	18	22	18	22	50.2	50.2	50.2	58.48	528	528	0	179.43	By MS/MS	By MS/MS	42.4	50.2	309950000	127620000	182320000	128950000	158090000	14	22	36				638	49;487;690;1024;1992;2031;2536;2796;2897;3222;3875;3885;3916;4158;4286;5078;5315;5546;5606;5802;6208;6347	True;True;True;True;True;True;True;True;True;True;True;True;True;True;True;True;True;True;True;True;True;True	50;508;723;1074;2078;2118;2636;2909;3014;3358;4027;4044;4085;4086;4352;4353;4492;5318;5562;5809;5873;6080;6501;6642	96;97;1083;1084;1507;2183;2184;4433;4434;4517;4518;4519;4520;5554;5555;6045;6046;6248;6249;6940;8197;8198;8354;8355;8439;8440;8441;8442;9346;9347;9348;9625;9626;11342;11343;11799;12327;12328;12466;12467;12867;13669;13670;13932;13933	90;1046;1047;1451;2091;4274;4275;4349;4350;4351;5314;5315;5784;5972;5973;6655;7838;7839;8006;8007;8078;8079;9052;9053;9054;9312;9313;10935;10936;11363;11878;11879;12006;12007;12392;13165;13166;13167;13419;13420	90;1047;1451;2091;4275;4350;5314;5784;5972;6655;7838;8007;8078;9053;9312;10936;11363;11878;12006;12392;13167;13419	237;238	47;393
SPBC1A4.10c|med14|II|mediator	SPBC1A4.10c|med14|II|mediator	10	10	10	>SPBC1A4.10c|med14|II|mediator complex subunit Med14	1	10	10	10	9	10	9	10	9	10	11.8	11.8	11.8	100.83	879	879	0	67.519	By MS/MS	By MS/MS	10.7	11.8	73880000	37830000	36050000	37460000	34549000	9	7	16				639	1194;2224;2469;2534;3516;3784;4065;4466;5703;6592	True;True;True;True;True;True;True;True;True;True	1252;2315;2567;2634;3658;3932;4258;4682;5978;6895	2534;2535;4957;4958;5423;5424;5551;5552;7485;7486;8009;8010;9179;10027;10028;12660;12661;14466;14467	2415;4756;5189;5190;5311;5312;7172;7173;7660;7661;8895;9683;9684;12199;12200;13954;13955	2415;4756;5189;5311;7172;7661;8895;9683;12199;13954
SPBC21.05c|ral2|II|Ras1-Scd	SPBC21.05c|ral2|II|Ras1-Scd	1	1	1	>SPBC21.05c|ral2|II|Ras1-Scd pathway protein Ral2	1	1	1	1	1	1	1	1	1	1	1.5	1.5	1.5	69.847	611	611	0.0030675	6.7168	By MS/MS	By MS/MS	1.5	1.5	3878300	1446500	2431800	0	2305600	1	0	1				640	1438	TRUE	1504	3055;3056	2913;2914	2914
SPBC215.05|gpd1|II|glycerol-3-phosphate	SPBC215.05|gpd1|II|glycerol-3-phosphate	15	15	15	>SPBC215.05|gpd1|II|glycerol-3-phosphate dehydrogenase Gpd1	1	15	15	15	15	15	15	15	15	15	48.1	48.1	48.1	41.995	385	385	0	146.56	By MS/MS	By MS/MS	48.1	48.1	470150000	210920000	259230000	212280000	233920000	14	18	32				641	66;558;843;1101;1295;1831;2934;3246;3855;3968;4312;4642;4909;4995;6540	True;True;True;True;True;True;True;True;True;True;True;True;True;True;True	67;582;886;1156;1355;1908;3052;3382;4004;4156;4157;4521;4522;4865;5145;5234;6840	131;132;1219;1220;1807;1808;2347;2348;2744;2745;4117;4118;6324;6325;6986;6987;8157;8158;8705;8706;8707;8708;9709;9710;9711;10481;10482;11020;11021;11188;11189;14355;14356	125;126;1172;1731;1732;2243;2244;2598;2599;3968;3969;6048;6049;6700;6701;7796;7797;8361;8362;8363;9395;9396;9397;9398;10121;10122;10634;10635;10794;10795;13850;13851	125;1172;1731;2244;2598;3969;6049;6700;7796;8361;9396;10122;10635;10795;13851	239;240	58;237
SPBC215.08c|arg4|II|arginine	SPBC215.08c|arg4|II|arginine	3	3	3	>SPBC215.08c|arg4|II|arginine specific carbamoyl-phosphate synthase Arg4 (predicted)	1	3	3	3	3	1	3	1	3	1	2.9	2.9	2.9	127.48	1160	1160	0	19.025	By MS/MS	By MS/MS	2.9	0.9	5055400	3173500	1882000	3173500	0	2	1	3				642	2286;5382;6349	True;True;True	2378;5633;6644	5076;11924;13936;13937	4858;11480;13423	4858;11480;13423
SPBC215.09c|erg10|II|acetyl-CoA	SPBC215.09c|erg10|II|acetyl-CoA	18	18	18	>SPBC215.09c|erg10|II|acetyl-CoA C-acetyltransferase Erg10 (predicted)	1	18	18	18	18	16	18	16	18	16	58.7	58.7	58.7	40.997	395	395	0	147.66	By MS/MS	By MS/MS	58.7	48.9	402080000	206380000	195700000	195170000	185410000	16	14	30				643	127;443;660;1081;1582;2476;2496;2553;3261;3809;4392;4970;5598;5971;6070;6071;6085;6461	True;True;True;True;True;True;True;True;True;True;True;True;True;True;True;True;True;True	135;462;692;1136;1652;2574;2595;2654;3398;3957;4605;5208;5864;5865;6254;6358;6359;6360;6361;6375;6758	374;375;984;1452;1453;2310;2311;3443;3444;5435;5436;5475;5476;5585;5586;7013;7014;8068;8069;9875;9876;11140;11141;12449;12450;12451;12452;13213;13214;13215;13402;13403;13404;13405;13406;13431;13432;14213;14214	366;367;952;1400;1401;2209;3311;3312;5201;5202;5239;5240;5342;5343;6726;6727;7713;9555;9556;10751;11992;11993;11994;11995;12719;12720;12900;12901;12902;12903;12904;12929;13716;13717	367;952;1401;2209;3311;5201;5240;5342;6726;7713;9556;10751;11994;12720;12901;12902;12929;13716	241;242;243	16;55;349
SPBC215.11c|SPBC215.11c|II|aldo/keto	SPBC215.11c|SPBC215.11c|II|aldo/keto	4	4	4	>SPBC215.11c|SPBC215.11c|II|aldo/keto reductase, unknown biological role	1	4	4	4	4	4	4	4	4	4	14.1	14.1	14.1	33.922	306	306	0	30.024	By MS/MS	By MS/MS	14.1	14.1	25090000	18582000	6508800	18591000	6161100	4	2	6				644	13;2854;4344;4458	True;True;True;True	13;2967;4555;4674	24;25;6157;6158;9777;9778;10012;10013	23;24;5890;9467;9670;9671	23;5890;9467;9671
SPBC215.12|cwf10|II|U5	SPBC215.12|cwf10|II|U5	3	2	2	>SPBC215.12|cwf10|II|U5 snRNP GTPase subunit Cwf10	1	3	2	2	3	3	2	2	2	2	2.9	1.9	1.9	111.31	984	984	0	10.908	By MS/MS	By MS/MS	2.9	2.9	7632500	3975600	3656900	3819100	3623600	1	2	3				645	1727;4852;6280	False;True;True	1801;5087;6574	3730;3731;10911;10912;10913;13799;13800	3590;10535;10536;13288	3590;10536;13288
SPBC215.15|sec13|II|COPII-coated	SPBC215.15|sec13|II|COPII-coated	3	3	3	>SPBC215.15|sec13|II|COPII-coated vesicle component Sec13	1	3	3	3	1	3	1	3	1	3	15.2	15.2	15.2	32.568	297	297	0	21.706	By MS/MS	By MS/MS	5.1	15.2	21211000	5466200	15745000	0	14928000	1	3	4				646	1749;5596;5864	True;True;True	1823;5862;6144	3821;3822;12447;12989	3678;3679;11990;12506	3678;11990;12506
SPBC216.05|rad3|II|ATR	SPBC216.05|rad3|II|ATR	2	2	2	>SPBC216.05|rad3|II|ATR checkpoint kinase Rad3	1	2	2	2	1	1	1	1	1	1	0.9	0.9	0.9	273.53	2386	2386	0	11.708	By MS/MS	By MS/MS	0.5	0.4	4696300	4696300	0	4696300	0	0	1	1				647	793;4580	True;True	831;4801	1709;10279	1638;9914	1638;9914
SPBC216.07c|tor2|II|serine/threonine;SPBC30D10.10c|tor1|II|serine/threonine	SPBC216.07c|tor2|II|serine/threonine	7;1	7;1	7;1	>SPBC216.07c|tor2|II|serine/threonine protein kinase Tor2	2	7	7	7	6	7	6	7	6	7	3.4	3.4	3.4	266.38	2337	2337;2335	0	45.665	By MS/MS	By MS/MS	2.8	3.4	13895000	6516900	7378000	6210300	7301600	4	6	10				648	294;341;2301;3267;3308;3434;5121	True;True;True;True;True;True;True	307;357;2393;3404;3446;3573;5361	693;694;792;793;5101;5102;7023;7024;7097;7098;7328;7329;11421	680;772;773;4882;4883;6736;6737;6813;7029;7030;11012	680;773;4883;6736;6813;7029;11012
SPBC21B10.03c|ath1|II|ataxin-2	SPBC21B10.03c|ath1|II|ataxin-2	1	1	1	>SPBC21B10.03c|ath1|II|ataxin-2 homolog	1	1	1	1	1	0	1	0	1	0	2.1	2.1	2.1	85.523	791	791	0.0023419	8.7777	By MS/MS	By matching	2.1	0	3599200	3599200	0	3599200	0	1	0	1				649	5803	TRUE	6081	12868	12393	12393
SPBC21B10.08c|SPBC21B10.08c|II|antibiotic	SPBC21B10.08c|SPBC21B10.08c|II|antibiotic	2	2	2	>SPBC21B10.08c|SPBC21B10.08c|II|antibiotic biosynthesis monooxygenase-like domain (predicted)	1	2	2	2	2	2	2	2	2	2	14.1	14.1	14.1	21.833	198	198	0	12.072	By MS/MS	By MS/MS	14.1	14.1	4255100	2391400	1863700	0	1766900	2	2	4				650	79;2532	True;True	83;2632	158;159;160;5548;5549	151;152;5308;5309	151;5308
SPBC21B10.10|rps402|II|40S	SPBC21B10.10|rps402|II|40S	11	11	1	>SPBC21B10.10|rps402|II|40S ribosomal protein S4 (predicted)	1	11	11	1	9	11	9	11	1	1	37	37	4.6	29.658	262	262	0	87.258	By MS/MS	By MS/MS	32.4	37	189670000	89636000	100040000	87096000	97383000	5	12	17				651	417;925;1007;1310;1987;3509;3642;3643;3656;5278;6573	True;True;True;True;True;True;True;True;True;True;True	436;971;1057;1370;2073;3651;3788;3789;3802;5523;6875	932;1974;2149;2150;2151;2152;2771;2772;4424;4425;7473;7474;7730;7731;7732;7733;7758;7759;11725;11726;14423;14424	900;1884;2059;2060;2061;2062;2622;4265;4266;7160;7161;7392;7393;7418;7419;11294;11295;13916	900;1884;2062;2622;4265;7161;7392;7393;7419;11294;13916
SPBC21C3.08c|car2|II|ornithine	SPBC21C3.08c|car2|II|ornithine	12	12	12	>SPBC21C3.08c|car2|II|ornithine transaminase Car2	1	12	12	12	9	10	9	10	9	10	41.8	41.8	41.8	48.247	438	438	0	91.504	By MS/MS	By MS/MS	32.9	29.2	139360000	49258000	90104000	60267000	74418000	8	11	19				652	204;250;1554;1768;1974;2483;2903;4738;5028;5553;6561;6678	True;True;True;True;True;True;True;True;True;True;True;True	214;262;1624;1843;2060;2581;3020;4964;5268;5816;6862;6982	514;603;604;3273;3274;3984;3985;4400;4401;5449;5450;6263;10673;11249;11250;12344;14394;14650;14651	503;586;587;3117;3118;3845;4241;4242;5215;5216;5984;10297;10849;10850;11895;13884;13885;14129;14130	503;587;3118;3845;4242;5215;5984;10297;10849;11895;13885;14129	244;245	155;160
SPBC21C3.13|rps1901|II|40S;SPBC649.02|rps1902|II|40S	SPBC21C3.13|rps1901|II|40S;SPBC649.02|rps1902|II|40S	4;3	4;3	4;3	>SPBC21C3.13|rps1901|II|40S ribosomal protein S19 (predicted);>SPBC649.02|rps1902|II|40S ribosomal protein S19 (predicted)	2	4	4	4	4	4	4	4	4	4	29.2	29.2	29.2	16.15	144	144;143	0	31.229	By MS/MS	By MS/MS	29.2	29.2	237820000	109410000	128410000	109110000	96360000	4	4	8				653	1057;1415;2994;3960	True;True;True;True	1110;1481;3116;4143;4144	2259;2260;3013;3014;6468;6469;8677;8678;8679;8680	2160;2161;2870;2871;6203;8336;8337;8338	2160;2870;6203;8338	246	28
SPBC21D10.09c|rkr1|II|RQC	SPBC21D10.09c|rkr1|II|RQC	3	3	3	>SPBC21D10.09c|rkr1|II|RQC complex ubiquitin-protein ligase E3 Rkr1 (predicted)	1	3	3	3	1	2	1	2	1	2	1.7	1.7	1.7	184.37	1610	1610	0	17.21	By MS/MS	By MS/MS	0.5	1.2	0	0	0	0	0	1	2	3				654	3209;3255;4839	True;True;True	3344;3392;5073	6914;7002;10887	6631;6716;10513	6631;6716;10513
SPBC21D10.11c|nfs1|II|mitochondrial	SPBC21D10.11c|nfs1|II|mitochondrial	5	5	5	>SPBC21D10.11c|nfs1|II|mitochondrial cysteine desulfurase Nfs1 (predicted)	1	5	5	5	4	4	4	4	4	4	16	16	16	55.543	501	501	0	32.451	By MS/MS	By MS/MS	12.2	12.6	20719000	13222000	7497100	12059000	8271000	4	3	7				655	1581;3296;4905;5435;5987	True;True;True;True;True	1651;3433;5141;5689;6270	3441;3442;7075;7076;11011;12032;12033;13242	3308;3309;3310;6793;10626;11589;12745	3310;6793;10626;11589;12745
SPBC23E6.04c|utp10|II|U3	SPBC23E6.04c|utp10|II|U3	2	2	2	>SPBC23E6.04c|utp10|II|U3 snoRNP-associated protein Utp10 (predicted)	1	2	2	2	0	2	0	2	0	2	2.1	2.1	2.1	186.41	1649	1649	0	20.517	By matching	By MS/MS	0	2.1	0	0	0	0	0	0	2	2				656	124;330	True;True	132;346	369;773	361;754	361;754
SPBC23E6.09|ssn6|II|transcriptional	SPBC23E6.09|ssn6|II|transcriptional	1	1	1	>SPBC23E6.09|ssn6|II|transcriptional corepressor Ssn6	1	1	1	1	1	1	1	1	1	1	0.8	0.8	0.8	121.52	1102	1102	0.0095694	6.1234	By MS/MS	By MS/MS	0.8	0.8	0	0	0	0	0	1	1	2				657	1289	TRUE	1349	2733;2734	2588;2589	2588
SPBC23G7.10c|SPBC23G7.10c|II|NADH-dependent	SPBC23G7.10c|SPBC23G7.10c|II|NADH-dependent	11	11	11	>SPBC23G7.10c|SPBC23G7.10c|II|NADH-dependent flavin oxidoreductase (predicted)	1	11	11	11	11	1	11	1	11	1	35.9	35.9	35.9	43.683	395	395	0	76.879	By MS/MS	By matching	35.9	2.3	77127000	76086000	1041600	67272000	0	14	0	14				658	662;1883;1894;1961;2441;2515;2548;2645;2777;5491;6170	True;True;True;True;True;True;True;True;True;True;True	694;1964;1965;1977;2047;2538;2614;2648;2649;2751;2889;5750;6462	1455;4219;4220;4240;4373;5373;5511;5576;5577;5761;6009;12178;13588;13589	1403;4075;4076;4097;4217;5139;5272;5333;5334;5507;5744;11729;13081;13082	1403;4076;4097;4217;5139;5272;5334;5507;5744;11729;13082	247;248	84;242
SPBC23G7.12c|rpt6|II|19S	SPBC23G7.12c|rpt6|II|19S	12	12	11	>SPBC23G7.12c|rpt6|II|19S proteasome regulatory subunit Rpt6 (predicted)	1	12	12	11	11	12	11	12	10	11	40.7	40.7	37.7	45.069	403	403	0	98.92	By MS/MS	By MS/MS	37.2	40.7	196730000	98979000	97751000	96148000	91460000	9	11	20				659	1002;1078;1787;2337;2649;2663;3452;4008;5555;5575;5926;6663	True;True;True;True;True;True;True;True;True;True;True;True	1052;1133;1863;2431;2755;2769;3592;4198;5818;5819;5839;6207;6967	2136;2137;2304;2305;4022;4023;5172;5173;5769;5770;5792;5793;7364;7365;9037;9038;12346;12347;12348;12349;12382;12383;12384;13108;14620;14621	2045;2046;2203;2204;3879;3880;4945;4946;5513;5514;5533;5534;7060;7061;8759;8760;11897;11898;11899;11930;11931;12618;14105;14106	2045;2203;3880;4946;5514;5533;7061;8760;11899;11931;12618;14105	249	270
SPBC23G7.16|ctr6|II|vacuolar	SPBC23G7.16|ctr6|II|vacuolar	1	1	1	>SPBC23G7.16|ctr6|II|vacuolar copper transmembrane transporter Ctr6	1	1	1	1	1	1	1	1	1	1	10.8	10.8	10.8	16.747	148	148	0.0022805	8.0836	By matching	By MS/MS	10.8	10.8	3329500	1677200	1652300	0	1566500	0	1	1				660	2010	TRUE	2096	4467;4468	4306	4306
SPBC244.01c|sid4|II|SIN	SPBC244.01c|sid4|II|SIN	2	2	2	>SPBC244.01c|sid4|II|SIN component scaffold protein Sid4	1	2	2	2	2	2	2	2	2	2	4.2	4.2	4.2	74.472	660	660	0	14.391	By MS/MS	By MS/MS	4.2	4.2	39719000	29579000	10141000	0	9614300	2	1	3				661	4293;6126	True;True	4499;6416	9639;9640;13509;13510	9324;9325;13007	9324;13007
SPBC24C6.04|SPBC24C6.04|II|delta-1-pyrroline-5-carboxylate	SPBC24C6.04|SPBC24C6.04|II|delta-1-pyrroline-5-carboxylate	20	20	20	>SPBC24C6.04|SPBC24C6.04|II|delta-1-pyrroline-5-carboxylate dehydrogenase (predicted)	1	20	20	20	17	17	17	17	17	17	54.7	54.7	54.7	60.218	548	548	0	181.15	By MS/MS	By MS/MS	45.1	47.1	237990000	117810000	120180000	115650000	116100000	17	17	34				662	8;15;58;894;1066;2228;2261;3479;4030;4102;4351;4767;4953;5070;5792;5874;5992;6260;6382;6391	True;True;True;True;True;True;True;True;True;True;True;True;True;True;True;True;True;True;True;True	8;15;59;940;1119;2319;2353;3619;4222;4295;4562;4994;5191;5310;6068;6154;6275;6553;6677;6686	14;15;28;116;117;1908;1909;2277;2278;4964;4965;5035;5036;7415;9110;9111;9239;9789;10735;10736;11110;11329;11330;12844;12845;13010;13251;13252;13760;13761;14001;14002;14022;14023	13;14;27;110;111;112;1823;1824;1825;2177;2178;4762;4763;4823;7107;8829;8830;8951;9477;10362;10363;10717;10923;12372;12373;12526;12755;12756;12757;13250;13251;13252;13484;13485;13506;13507	14;27;111;1825;2177;4763;4823;7107;8830;8951;9477;10363;10717;10923;12373;12526;12757;13251;13484;13507
SPBC24C6.05|sec28|II|coatomer	SPBC24C6.05|sec28|II|coatomer	1	1	1	>SPBC24C6.05|sec28|II|coatomer epsilon subunit (predicted)	1	1	1	1	1	1	1	1	1	1	4.5	4.5	4.5	31.774	288	288	0.0022272	7.696	By matching	By MS/MS	4.5	4.5	6771000	3711800	3059200	0	2900400	0	1	1				663	4087	TRUE	4280	9215;9216	8929	8929
SPBC25B2.09c|mrs1|II|mitochondrial	SPBC25B2.09c|mrs1|II|mitochondrial	10	10	10	>SPBC25B2.09c|mrs1|II|mitochondrial and cytoplasmic arginine-tRNA ligase Rrs1/Mrs1 (predicted)	1	10	10	10	10	8	10	8	10	8	17.8	17.8	17.8	70.689	618	618	0	67.618	By MS/MS	By MS/MS	17.8	14.6	40175000	17911000	22264000	21817000	17203000	9	7	16				664	769;882;2178;3057;3320;3399;5052;5204;6087;6292	True;True;True;True;True;True;True;True;True;True	805;927;2268;3186;3458;3538;5292;5448;6377;6586	1662;1881;1882;4826;4827;6611;6612;7118;7119;7262;7263;11294;11295;11578;11579;13435;13436;13822	1593;1797;1798;4639;4640;6340;6341;6833;6968;6969;10890;10891;11157;11158;12932;12933;13310	1593;1798;4640;6341;6833;6969;10891;11158;12933;13310
SPBC25D12.03c|mcm7|II|MCM	SPBC25D12.03c|mcm7|II|MCM	3	3	3	>SPBC25D12.03c|mcm7|II|MCM complex subunit Mcm7	1	3	3	3	2	2	2	2	2	2	5	5	5	85.621	760	760	0	19.141	By MS/MS	By MS/MS	3.3	3.6	5251400	2738000	2513400	0	2382900	2	2	4				665	1304;1691;4927	True;True;True	1364;1764;5165	2761;3663;11053;11054	2615;3526;10665;10666	2615;3526;10665
SPBC25D12.04|suc22|II|ribonucleotide	SPBC25D12.04|suc22|II|ribonucleotide	4	4	4	>SPBC25D12.04|suc22|II|ribonucleotide reductase small subunit Suc22	1	4	4	4	4	4	4	4	4	4	10.5	10.5	10.5	45.405	391	391	0	28.162	By MS/MS	By MS/MS	10.5	10.5	41922000	24083000	17839000	19722000	21274000	3	3	6				666	768;1561;1608;6474	True;True;True;True	804;1631;1678;6772	1660;1661;3285;3286;3492;3493;3494;14240;14241	1592;3128;3129;3360;3361;13740	1592;3128;3360;13740
SPBC25H2.02|trs1|II|cytoplasmic	SPBC25H2.02|trs1|II|cytoplasmic	27	27	27	>SPBC25H2.02|trs1|II|cytoplasmic threonine-tRNA ligase Trs1 (predicted)	1	27	27	27	23	27	23	27	23	27	42.8	42.8	42.8	80.137	703	703	0	211.22	By MS/MS	By MS/MS	38.1	42.8	448990000	185100000	263890000	192700000	228620000	23	28	51				667	239;944;985;1520;1928;1929;1948;1991;2025;2342;2343;2647;2831;3118;4013;4251;4453;4639;5923;5924;5959;6194;6273;6303;6342;6527;6528	True;True;True;True;True;True;True;True;True;True;True;True;True;True;True;True;True;True;True;True;True;True;True;True;True;True;True	251;991;1033;1034;1588;2013;2014;2034;2077;2112;2436;2437;2753;2944;3249;4203;4455;4669;4862;6204;6205;6242;6486;6566;6597;6636;6637;6825;6826	585;586;2013;2014;2092;2093;2094;2095;2096;2097;3208;3209;4305;4306;4307;4347;4348;4431;4432;4499;4500;5180;5181;5182;5183;5184;5764;5765;6108;6109;6728;6729;9048;9049;9548;9549;10001;10002;10475;10476;13103;13104;13105;13191;13192;13632;13783;13784;13843;13844;13920;13921;13922;14324;14325;14326;14327	569;570;1921;1922;2004;2005;2006;2007;2008;3057;3058;4156;4157;4195;4272;4273;4332;4333;4334;4953;4954;4955;4956;4957;5510;5840;5841;6453;6454;8769;8770;9241;9242;9243;9660;9661;9662;10115;10116;12614;12615;12616;12698;12699;13124;13272;13273;13331;13332;13407;13408;13409;13819;13820;13821;13822	570;1921;2007;3057;4156;4157;4195;4272;4333;4953;4955;5510;5841;6454;8770;9243;9660;10116;12614;12616;12699;13124;13273;13332;13407;13819;13822	250;251	196;595
SPBC25H2.05|egd2|II|nascent	SPBC25H2.05|egd2|II|nascent	4	4	4	>SPBC25H2.05|egd2|II|nascent polypeptide-associated complex alpha subunit Egd2	1	4	4	4	3	3	3	3	3	3	36.4	36.4	36.4	18.785	173	173	0	28.367	By MS/MS	By MS/MS	27.2	22	26028000	14571000	11458000	14571000	0	2	2	4				668	2370;2704;4085;4385	True;True;True;True	2465;2816;4278;4597	5241;5242;5889;9212;9213;9859	5010;5011;5630;8927;9538	5010;5630;8927;9538
SPBC25H2.12c|cct7|II|chaperonin-containing	SPBC25H2.12c|cct7|II|chaperonin-containing	5	5	5	>SPBC25H2.12c|cct7|II|chaperonin-containing T-complex eta subunit Cct7	1	5	5	5	3	5	3	5	3	5	10	10	10	60.686	558	558	0	31.333	By MS/MS	By MS/MS	5.9	10	16551000	9198200	7353300	9112300	7057400	3	6	9				669	1627;1720;2155;4567;5402	True;True;True;True;True	1697;1794;2245;4788;5655	3530;3716;3717;4779;4780;4781;10255;10256;11974	3396;3578;3579;4599;4600;4601;9892;9893;11534	3396;3578;4600;9893;11534
SPBC25H2.16c|gga22|II|Golgi	SPBC25H2.16c|gga22|II|Golgi	4	4	4	>SPBC25H2.16c|gga22|II|Golgi localized Arf binding gamma-adaptin ortholog Gga22	1	4	4	4	3	4	3	4	3	4	10.1	10.1	10.1	59.481	533	533	0	32.727	By MS/MS	By MS/MS	8.6	10.1	14802000	9410500	5391200	0	5111300	3	4	7				670	959;2026;3374;5667	True;True;True;True	1007;2113;3513;5939	2044;4501;4502;7217;7218;12588;12589	1957;4335;4336;6924;6925;12129;12130	1957;4336;6924;12129
SPBC26H8.07c|nda3|II|tubulin;CON__ENSEMBL:ENSBTAP00000025008	SPBC26H8.07c|nda3|II|tubulin	8;1	8;1	8;1	>SPBC26H8.07c|nda3|II|tubulin beta Nda3	2	8	8	8	6	8	6	8	6	8	25	25	25	49.471	448	448;536	0	63.825	By MS/MS	By MS/MS	16.5	25	70063000	32232000	37831000	34226000	33873000	5	7	12				671	516;1755;3087;3224;3534;4232;5116;6545	True;True;True;True;True;True;True;True	538;1829;3218;3360;3678;4435;5356;6845	1147;3832;3833;6669;6670;6943;6944;7526;7527;9511;9512;11413;14364;14365	1106;3688;3689;6395;6396;6658;6659;7215;9209;9210;11004;13859;13860	1106;3688;6396;6659;7215;9209;11004;13860	252	73
SPBC26H8.11c|SPBC26H8.11c|II|thioesterase	SPBC26H8.11c|SPBC26H8.11c|II|thioesterase	4	4	4	>SPBC26H8.11c|SPBC26H8.11c|II|thioesterase superfamily protein	1	4	4	4	4	4	4	4	4	4	29.7	29.7	29.7	19.59	175	175	0	25.251	By MS/MS	By MS/MS	29.7	29.7	36934000	17466000	19468000	18587000	17337000	2	4	6				672	595;3508;4098;5287	True;True;True;True	620;3650;4291;5534	1286;1287;7471;7472;9232;9233;11746;11747	1233;7159;8944;8945;11315;11316	1233;7159;8945;11316
SPBC27.08c|sua1|II|sulfate	SPBC27.08c|sua1|II|sulfate	14	14	14	>SPBC27.08c|sua1|II|sulfate adenylyltransferase	1	14	14	14	9	14	9	14	9	14	26.5	26.5	26.5	54.754	490	490	0	99.364	By MS/MS	By MS/MS	18.4	26.5	141460000	63281000	78179000	75582000	61820000	9	14	23				673	157;205;870;905;2069;2249;2943;3099;3560;3649;4321;5531;6197;6267	True;True;True;True;True;True;True;True;True;True;True;True;True;True	167;215;914;951;2156;2340;3061;3230;3704;3795;4531;5793;6489;6560	431;432;515;1859;1860;1939;1940;1941;4594;4595;5007;5008;6340;6690;6691;7575;7576;7744;7745;9727;12277;13636;13773;13774	421;422;504;1776;1777;1854;1855;4421;4422;4798;4799;6064;6415;6416;6417;7258;7259;7404;7405;9416;11824;13128;13262;13263	422;504;1776;1854;4422;4799;6064;6417;7258;7405;9416;11824;13128;13262
SPBC27B12.04c|far11|II|SIP/FAR	SPBC27B12.04c|far11|II|SIP/FAR	2	2	2	>SPBC27B12.04c|far11|II|SIP/FAR complex subunit, Far11/Csc2	1	2	2	2	0	2	0	2	0	2	2.6	2.6	2.6	95.092	817	817	0	12.7	By matching	By MS/MS	0	2.6	6263400	0	6263400	0	5938300	0	2	2				674	5503;5644	True;True	5764;5914	12206;12535	11755;12076	11755;12076
SPBC27B12.08|sip1|II|Pof6	SPBC27B12.08|sip1|II|Pof6	3	3	3	>SPBC27B12.08|sip1|II|Pof6 interacting protein Sip1, predicted AP-1 accessory protein	1	3	3	3	1	3	1	3	1	3	1.4	1.4	1.4	217.69	1919	1919	0	17.023	By MS/MS	By MS/MS	0.4	1.4	3473900	1087800	2386100	0	2262200	0	1	1				675	2549;3197;4234	True;True;True	2650;3332;4437	5578;6894;9515;9516	5335;6614;9212;9213	5335;6614;9212
SPBC27B12.11c|pho7|II|transcription	SPBC27B12.11c|pho7|II|transcription	1	1	1	>SPBC27B12.11c|pho7|II|transcription factor Pho7	1	1	1	1	1	1	1	1	1	1	2.2	2.2	2.2	81.928	738	738	0.0022548	7.8421	By MS/MS	By MS/MS	2.2	2.2	7315300	3471800	3843500	0	3644000	1	1	2				676	4409	TRUE	4623	9910;9911	9583;9584	9584
SPBC28E12.03|rga4|II|Rho-type	SPBC28E12.03|rga4|II|Rho-type	12	12	12	>SPBC28E12.03|rga4|II|Rho-type GTPase activating protein Rga4	1	12	12	12	8	12	8	12	8	12	17.9	17.9	17.9	104.49	933	933	0	84.379	By MS/MS	By MS/MS	12.5	17.9	132200000	57681000	74515000	63263000	65065000	6	9	15				677	138;209;427;3581;3723;3934;4021;4117;4258;4329;4410;4865	True;True;True;True;True;True;True;True;True;True;True;True	146;220;446;3725;3870;4112;4213;4310;4464;4539;4624;5100	393;526;527;953;954;7613;7614;7887;8614;9092;9093;9270;9569;9570;9744;9745;9912;9913;10934;10935	384;514;515;922;923;7294;7541;8272;8812;8813;8979;9263;9264;9437;9585;10555;10556	384;514;923;7294;7541;8272;8812;8979;9263;9437;9585;10556	253	189
SPBC28E12.06c|lvs1|II|beige	SPBC28E12.06c|lvs1|II|beige	2	2	2	>SPBC28E12.06c|lvs1|II|beige protein homolog Lvs1 (predicted)	1	2	2	2	2	2	2	2	2	2	0.8	0.8	0.8	295.65	2609	2609	0	11.921	By MS/MS	By MS/MS	0.8	0.8	6000800	2428300	3572500	0	3387100	1	1	2				678	841;4129	True;True	884;4322	1803;1804;9291;9292	1727;1728;9000	1728;9000
SPBC28F2.03|ppi1|II|cyclophilin	SPBC28F2.03|ppi1|II|cyclophilin	8	8	8	>SPBC28F2.03|ppi1|II|cyclophilin family peptidyl-prolyl cis-trans isomerase Cyp2	1	8	8	8	7	8	7	8	7	8	69.8	69.8	69.8	17.402	162	162	0	71.554	By MS/MS	By MS/MS	59.9	69.8	648670000	317900000	330760000	276480000	235670000	9	15	24				679	1496;2014;2187;2250;3174;4974;5081;5955	True;True;True;True;True;True;True;True	1564;2100;2278;2341;2342;3308;5212;5321;6237;6238	3160;3161;3162;3163;4475;4476;4477;4478;4877;4878;5009;5010;5011;5012;5013;5014;6847;6848;6849;11150;11151;11348;13182;13183;13184;13185	3012;3013;3014;4312;4313;4314;4688;4689;4800;4801;4802;4803;4804;4805;6568;6569;6570;10759;10760;10761;10941;12689;12690;12691;12692;12693	3014;4314;4689;4802;6570;10761;10941;12689	254;255;256	59;98;134
SPBC29A10.08|gas2|II|1,3-beta-glucanosyltransferase	SPBC29A10.08|gas2|II|1,3-beta-glucanosyltransferase	1	1	1	>SPBC29A10.08|gas2|II|1,3-beta-glucanosyltransferase Gas2 (predicted)	1	1	1	1	1	1	1	1	1	1	3.3	3.3	3.3	50.614	459	459	0.0030581	6.678	By MS/MS	By matching	3.3	3.3	5416600	2996100	2420500	0	2294800	0	0	0				680	5474	TRUE	5729	12130;12131	11680	11680
SPBC29A10.10c|dbl8|II|tRNA-splicing	SPBC29A10.10c|dbl8|II|tRNA-splicing	2	2	2	>SPBC29A10.10c|dbl8|II|tRNA-splicing endonuclease positive effector Dbl8	1	2	2	2	1	2	1	2	1	2	0.8	0.8	0.8	222.21	1944	1944	0	12.949	By MS/MS	By MS/MS	0.4	0.8	4288500	1279800	3008800	0	2852600	1	2	3				681	1444;2225	True;True	1510;2316	3065;4959;4960	2923;4757;4758	2923;4757
SPBC29A3.03c|gid2|II|GID	SPBC29A3.03c|gid2|II|GID	3	3	3	>SPBC29A3.03c|gid2|II|GID complex ubiquitin-protein ligase E3 subunit Gid2/Rmd5 (predicted)	1	3	3	3	3	1	3	1	3	1	6.3	6.3	6.3	45.63	398	398	0	18.186	By MS/MS	By matching	6.3	1.8	720290	365370	354920	0	336490	3	0	3				682	1394;4992;5554	True;True;True	1459;5231;5817	2970;2971;11184;12345	2825;10790;11896	2825;10790;11896
SPBC29A3.04|rpl8|II|60S	SPBC29A3.04|rpl8|II|60S	4	4	4	>SPBC29A3.04|rpl8|II|60S ribosomal protein L7a/L8 (predicted)	1	4	4	4	4	4	4	4	4	4	15.1	15.1	15.1	28.606	259	259	0	44.106	By MS/MS	By MS/MS	15.1	15.1	62270000	28140000	34130000	31329000	29169000	5	4	9				683	4206;5605;5766;6455	True;True;True;True	4405;5872;6042;6751	9445;9446;9447;9448;12464;12465;12783;12784;14198;14199;14200;14201	9145;9146;9147;12005;12313;12314;13703;13704;13705	9146;12005;12313;13705
SPBC29A3.09c|gcn20|II|AAA	SPBC29A3.09c|gcn20|II|AAA	7	7	7	>SPBC29A3.09c|gcn20|II|AAA family ATPase Gcn20 (predicted)	1	7	7	7	5	6	5	6	5	6	11.7	11.7	11.7	83.761	736	736	0	50.275	By MS/MS	By MS/MS	8.3	10.3	43946000	19538000	24408000	20808000	21871000	5	5	10				684	942;1863;2154;2168;2592;3407;4100	True;True;True;True;True;True;True	989;1942;2244;2258;2695;3546;4293	2009;2010;4176;4177;4777;4778;4807;5662;5663;7276;9236	1918;1919;4023;4024;4596;4597;4598;4623;5415;5416;6981;8948	1919;4024;4596;4623;5416;6981;8948
SPBC29A3.12|rps902|II|40S	SPBC29A3.12|rps902|II|40S	13	1	1	>SPBC29A3.12|rps902|II|40S ribosomal protein S9 (predicted)	1	13	1	1	13	13	1	1	1	1	50.5	4.2	4.2	22.245	192	192	0.0030644	6.6994	By MS/MS	By MS/MS	50.5	50.5	44033000	21846000	22186000	0	21035000	1	1	2				685	1107;1108;2111;2366;3038;3137;3184;3242;3596;3904;4480;4688;5761	False;False;False;False;False;False;False;True;False;False;False;False;False	1162;1163;2200;2461;3166;3268;3318;3378;3740;4067;4068;4696;4913;6037	2358;2359;2360;2361;2362;2363;4688;4689;5230;5231;6569;6570;6760;6761;6865;6866;6977;6978;7643;7644;8400;8401;8402;8403;10051;10052;10579;10580;12775;12776	2253;2254;2255;2256;2257;2258;2259;4512;4513;5002;5003;6296;6297;6482;6483;6587;6588;6692;6693;7317;7318;8041;8042;8043;8044;9708;9709;10211;10212;12305;12306	2256;2258;4513;5003;6296;6483;6588;6692;7318;8041;9709;10212;12305	97	91
SPBC29A3.18|cyt1|II|cytochrome	SPBC29A3.18|cyt1|II|cytochrome	4	4	4	>SPBC29A3.18|cyt1|II|cytochrome c1 Cyt1 (predicted)	1	4	4	4	3	3	3	3	3	3	20.8	20.8	20.8	34.34	307	307	0	62.129	By MS/MS	By MS/MS	13.7	15	23526000	11417000	12109000	10768000	12130000	1	4	5				686	857;2177;4347;6032	True;True;True;True	901;2267;4558;6316	1832;4824;4825;9783;13323;13324	1753;4638;9472;9473;12829	1753;4638;9473;12829
SPBC29B5.03c|rpl26|II|60S	SPBC29B5.03c|rpl26|II|60S	3	3	3	>SPBC29B5.03c|rpl26|II|60S ribosomal protein L26 (predicted)	1	3	3	3	3	3	3	3	3	3	20.6	20.6	20.6	14.341	126	126	0	17.744	By MS/MS	By MS/MS	20.6	20.6	34666000	16891000	17775000	16724000	17019000	3	3	6				687	193;1450;6017	True;True;True	203;1516;6300	498;499;3079;3080;13293;13294	488;489;2936;2937;12794;12795	488;2936;12794
SPBC2A9.02|SPBC2A9.02|II|NAD	SPBC2A9.02|SPBC2A9.02|II|NAD	7	7	7	>SPBC2A9.02|SPBC2A9.02|II|NAD dependent epimerase/dehydratase family protein	1	7	7	7	7	4	7	4	7	4	34.2	34.2	34.2	31.516	295	295	0	58.637	By MS/MS	By MS/MS	34.2	15.6	143300000	135450000	7853400	129590000	13302000	7	3	10				688	1940;3264;3271;4504;4516;5343;5936	True;True;True;True;True;True;True	2026;3401;3408;4721;4734;5591;6217	4332;7019;7030;10109;10110;10132;10133;11850;11851;13126;13127	4181;6732;6743;9758;9776;9777;11410;11411;12635;12636	4181;6732;6743;9758;9777;11410;12635
SPBC2A9.06c|nus1|II|di-trans,poly-cis-decaprenylcistransferase	SPBC2A9.06c|nus1|II|di-trans,poly-cis-decaprenylcistransferase	1	1	1	>SPBC2A9.06c|nus1|II|di-trans,poly-cis-decaprenylcistransferase Nus1	1	1	1	1	1	1	1	1	1	1	7	7	7	29.862	258	258	0.0023283	8.6517	By MS/MS	By matching	7	7	2112600	1391100	721440	0	683980	1	0	1				689	1192	TRUE	1249	2528;2529	2410	2410
SPBC2D10.04|SPBC2D10.04|II|arrestin	SPBC2D10.04|SPBC2D10.04|II|arrestin	2	2	2	>SPBC2D10.04|SPBC2D10.04|II|arrestin Aly1 related, implicated in endocytosis	1	2	2	2	2	1	2	1	2	1	3.2	3.2	3.2	72.731	658	658	0	12.16	By MS/MS	By MS/MS	3.2	1.7	7531100	6616100	915040	6616100	0	2	0	2				690	3234;6434	True;True	3370;6729	6959;14159;14160;14161	6672;13666;13667	6672;13667
SPBC2D10.10c|fib1|II|fibrillarin,	SPBC2D10.10c|fib1|II|fibrillarin,	2	2	2	>SPBC2D10.10c|fib1|II|fibrillarin, rRNA methyltransferase	1	2	2	2	2	2	2	2	2	2	7.2	7.2	7.2	32.04	305	305	0	14.458	By MS/MS	By MS/MS	7.2	7.2	19821000	11460000	8360600	11472000	7915000	2	3	5				691	2766;5572	True;True	2878;5836	5991;5992;12377;12378	5726;5727;11925;11926;11927	5726;11926
SPBC2D10.14c|myo51|II|myosin	SPBC2D10.14c|myo51|II|myosin	29	29	28	>SPBC2D10.14c|myo51|II|myosin type V	1	29	29	28	22	28	22	28	21	27	26.9	26.9	26.1	167.66	1471	1471	0	236.4	By MS/MS	By MS/MS	19.9	26.4	218340000	82079000	136260000	104090000	107180000	20	28	48				692	17;48;347;561;1484;2080;2753;2969;3157;3244;3623;3718;4010;4156;4207;4222;4324;4376;4402;4517;4830;4857;5095;5158;5230;5245;5253;5995;6494	True;True;True;True;True;True;True;True;True;True;True;True;True;True;True;True;True;True;True;True;True;True;True;True;True;True;True;True;True	17;49;363;585;1552;2167;2865;3089;3288;3380;3767;3864;4200;4350;4406;4422;4534;4587;4616;4735;5064;5092;5335;5401;5474;5490;5498;6278;6792	31;32;94;95;801;1225;1226;3141;3142;4615;4616;5969;6399;6794;6982;6983;7692;7693;7876;7877;9043;9044;9341;9342;9343;9344;9449;9450;9451;9452;9483;9484;9731;9838;9839;9894;9895;10134;10135;10871;10872;10921;10922;11370;11495;11496;11630;11631;11661;11673;11674;13256;13257;14269	30;31;88;89;779;1176;1177;2996;4441;4442;5706;6125;6512;6696;6697;7358;7359;7531;7532;7533;8764;8765;9047;9048;9049;9050;9148;9149;9150;9179;9180;9420;9517;9518;9570;9571;9778;9779;9780;10499;10500;10542;10543;10962;11083;11084;11206;11207;11235;11246;11247;12762;12763;13770	31;89;779;1176;2996;4442;5706;6125;6512;6696;7358;7533;8765;9050;9148;9180;9420;9517;9570;9780;10499;10543;10962;11083;11207;11235;11247;12762;13770
SPBC2F12.03c|ebs1|II|EST1	SPBC2F12.03c|ebs1|II|EST1	3	3	3	>SPBC2F12.03c|ebs1|II|EST1 family nonsense-mediated mRNA decay (NMD) pathway protein Ebs1 (predicted)	1	3	3	3	2	3	2	3	2	3	7.2	7.2	7.2	98.567	891	891	0	20.087	By MS/MS	By MS/MS	2.5	7.2	14682000	2768800	11913000	0	11295000	2	3	5				693	4898;4943;5015	True;True;True	5134;5181;5254	10997;11092;11093;11224;11225	10614;10701;10702;10827;10828	10614;10702;10828
SPBC2F12.04|rpl1701|II|60S	SPBC2F12.04|rpl1701|II|60S	6	6	2	>SPBC2F12.04|rpl1701|II|60S ribosomal protein L17	1	6	6	2	6	6	6	6	2	2	36.4	36.4	9.1	20.814	187	187	0	44.475	By MS/MS	By MS/MS	36.4	36.4	75731000	37814000	37916000	39518000	34244000	7	4	11				694	137;958;1354;1814;6172;6603	True;True;True;True;True;True	145;1006;1416;1890;6464;6907	391;392;2042;2043;2867;2868;4083;4084;13592;13593;14491;14492	382;383;1956;2725;2726;3936;13084;13085;13086;13976;13977	383;1956;2725;3936;13084;13977
SPBC2F12.05c|SPBC2F12.05c|II|sterol	SPBC2F12.05c|SPBC2F12.05c|II|sterol	2	2	2	>SPBC2F12.05c|SPBC2F12.05c|II|sterol binding ankyrin repeat protein (predicted)	1	2	2	2	0	2	0	2	0	2	1.5	1.5	1.5	148.47	1310	1310	0	11.402	By matching	By MS/MS	0	1.5	1068600	0	1068600	0	1013100	0	2	2				695	2723;5694	True;True	2835;5969	5921;12643	5663;12182	5663;12182
SPBC2F12.14c|gua1|II|IMP	SPBC2F12.14c|gua1|II|IMP	5	5	5	>SPBC2F12.14c|gua1|II|IMP dehydrogenase Gua1	1	5	5	5	5	2	5	2	5	2	12	12	12	57.026	524	524	0	36.571	By MS/MS	By MS/MS	12	5	28195000	15219000	12976000	14440000	13082000	4	2	6				696	661;1166;1710;2359;4985	True;True;True;True;True	693;1223;1784;2453;5224	1454;2481;2482;3700;5214;5215;11174	1402;2370;3562;4984;4985;10780	1402;2370;3562;4985;10780
SPBC2G2.02|syj1|II|inositol-polyphosphate	SPBC2G2.02|syj1|II|inositol-polyphosphate	3	3	3	>SPBC2G2.02|syj1|II|inositol-polyphosphate 5-phosphatase (synaptojanin homolog 1)	1	3	3	3	3	3	3	3	3	3	3.5	3.5	3.5	121.82	1076	1076	0	17.828	By MS/MS	By MS/MS	3.5	3.5	23435000	9414200	14021000	9172000	13535000	1	2	3				697	3685;4413;5573	True;True;True	3831;4627;5837	7811;7812;9918;9919;12379;12380	7468;9590;11928	7468;9590;11928
SPBC2G2.04c|mmf1|II|mitochondrial	SPBC2G2.04c|mmf1|II|mitochondrial	2	2	2	>SPBC2G2.04c|mmf1|II|mitochondrial matrix protein, YjgF family protein Mmf1	1	2	2	2	2	1	2	1	2	1	14.8	14.8	14.8	17.543	162	162	0.0011919	10.57	By MS/MS	By MS/MS	14.8	6.8	1205500	580450	625090	0	592640	2	1	3				698	5938;6282	True;True	6219;6576	13130;13131;13803	12639;12640;13290	12639;13290
SPBC2G2.11|myr1|II|N-myristoyltransferase	SPBC2G2.11|myr1|II|N-myristoyltransferase	2	2	2	>SPBC2G2.11|myr1|II|N-myristoyltransferase Myr1 (predicted)	1	2	2	2	2	2	2	2	2	2	3.4	3.4	3.4	53.696	466	466	0	11.974	By MS/MS	By MS/MS	3.4	3.4	6421500	3157500	3264000	3157500	0	2	2	4				699	1250;1296	True;True	1309;1356	2654;2655;2746;2747	2520;2521;2600;2601	2521;2601
SPBC2G2.12|hrs1|II|mitochondrial	SPBC2G2.12|hrs1|II|mitochondrial	4	4	4	>SPBC2G2.12|hrs1|II|mitochondrial and cytoplasmic histidine-tRNA ligase Hrs1 (predicted)	1	4	4	4	1	4	1	4	1	4	9.1	9.1	9.1	63.304	563	563	0	28.998	By matching	By MS/MS	1.6	9.1	7231800	1371900	5859900	0	5555700	0	3	3				700	1533;3387;5484;6042	True;True;True;True	1602;3526;5741;6326	3236;3237;7243;12156;13341	3082;6950;11704;12844	3082;6950;11704;12844
SPBC2G2.13c|dcd1|II|deoxycytidylate	SPBC2G2.13c|dcd1|II|deoxycytidylate	2	2	2	>SPBC2G2.13c|dcd1|II|deoxycytidylate deaminase (predicted)	1	2	2	2	2	1	2	1	2	1	10.2	10.2	10.2	35.974	322	322	0	20.743	By MS/MS	By MS/MS	10.2	5.9	8651900	5694400	2957500	0	2804000	2	2	4				701	271;5409	True;True	284;5662	650;11983;11984;11985	632;11543;11544;11545	632;11543
SPBC2G5.05|SPBC2G5.05|II|transketolase	SPBC2G5.05|SPBC2G5.05|II|transketolase	23	23	23	>SPBC2G5.05|SPBC2G5.05|II|transketolase (predicted)	1	23	23	23	21	20	21	20	21	20	42	42	42	75.181	685	685	0	214.07	By MS/MS	By MS/MS	36.6	36.9	527280000	243220000	284060000	242400000	264640000	23	22	45				702	907;1317;1386;1744;2166;2923;3187;3711;3863;4551;4585;4662;4891;5397;5502;5509;5590;5634;5670;5749;6248;6299;6649	True;True;True;True;True;True;True;True;True;True;True;True;True;True;True;True;True;True;True;True;True;True;True	953;1377;1451;1818;2256;3041;3321;3857;4012;4772;4806;4887;5126;5127;5648;5763;5770;5856;5903;5904;5942;6024;6541;6593;6953	1943;2783;2784;2953;2954;2955;2956;3760;3761;4802;4803;4804;6304;6305;6870;6871;7862;7863;8170;10222;10223;10291;10292;10526;10527;10528;10529;10984;10985;10986;10987;11953;11954;12202;12203;12204;12205;12218;12219;12436;12437;12519;12520;12521;12522;12592;12751;12752;13739;13834;13835;13836;14589	1857;2632;2633;2810;2811;2812;3620;4619;4620;6032;6033;6591;6592;7519;7520;7809;9864;9865;9923;9924;10163;10164;10165;10166;10604;10605;10606;11509;11510;11751;11752;11753;11754;11767;11768;11981;12062;12063;12064;12065;12133;12283;12284;13231;13323;13324;13325;14075	1857;2633;2812;3620;4620;6032;6591;7519;7809;9865;9923;10165;10606;11510;11751;11767;11981;12063;12133;12284;13231;13325;14075	257;258	37;637
SPBC2G5.06c|hmt2|II|sulfide-quinone	SPBC2G5.06c|hmt2|II|sulfide-quinone	9	9	9	>SPBC2G5.06c|hmt2|II|sulfide-quinone oxidoreductase	1	9	9	9	5	7	5	7	5	7	26.6	26.6	26.6	51.574	459	459	0	64.343	By MS/MS	By MS/MS	14.8	19.8	76321000	48355000	27967000	33297000	41572000	4	8	12				703	1432;1850;2617;3315;4153;4884;4913;6367;6481	True;True;True;True;True;True;True;True;True	1498;1927;2722;3453;4347;5119;5150;6662;6779	3042;3043;3044;4153;4154;5713;7109;7110;9337;10971;11029;13977;14251	2898;2899;2900;4002;4003;4004;5460;6824;6825;9044;10591;10641;13460;13749	2899;4004;5460;6824;9044;10591;10641;13460;13749
SPBC30B4.03c|adn1|II|adhesion	SPBC30B4.03c|adn1|II|adhesion	4	4	4	>SPBC30B4.03c|adn1|II|adhesion defective protein	1	4	4	4	4	4	4	4	4	4	11	11	11	43.837	391	391	0	27.406	By MS/MS	By MS/MS	11	11	23180000	11589000	11591000	11673000	10905000	3	4	7				704	733;3944;4665;6557	True;True;True;True	768;4123;4890;6858	1591;1592;8635;8636;10534;10535;14387;14388	1526;1527;8292;8293;10170;10171;13878	1526;8293;10170;13878
SPBC30B4.04c|sol1|II|SWI/SNF	SPBC30B4.04c|sol1|II|SWI/SNF	3	3	3	>SPBC30B4.04c|sol1|II|SWI/SNF complex subunit Sol1	1	3	3	3	2	2	2	2	2	2	4.4	4.4	4.4	96.017	865	865	0	27.343	By MS/MS	By MS/MS	3	3.1	15260000	6230500	9029100	0	8560300	2	3	5				705	1433;5560;6652	True;True;True	1499;5824;6956	3045;3046;12359;14592	2901;2902;2903;11909;14078	2903;11909;14078
SPBC30D10.03c|isn1|II|IMP	SPBC30D10.03c|isn1|II|IMP	2	2	2	>SPBC30D10.03c|isn1|II|IMP 5-nucleotidase Isn1 (predicted)	1	2	2	2	2	2	2	2	2	2	4.4	4.4	4.4	45.805	405	405	0	13.89	By MS/MS	By MS/MS	4.4	4.4	5356900	1676700	3680100	0	3489100	2	1	3				706	3335;4873	True;True	3473;5108	7144;7145;10949;10950	6857;10568;10569	6857;10568
SPBC30D10.05c|SPBC30D10.05c|II|sepiapterin	SPBC30D10.05c|SPBC30D10.05c|II|sepiapterin	3	3	3	>SPBC30D10.05c|SPBC30D10.05c|II|sepiapterin reductase (predicted)	1	3	3	3	2	3	2	3	2	3	18.2	18.2	18.2	26.645	247	247	0	22.98	By MS/MS	By MS/MS	13.4	18.2	16923000	9762700	7160700	9862800	6688900	2	2	4				707	344;1773;5060	True;True;True	360;1848;5300	797;798;3993;11309;11310	776;3852;10902;10903	776;3852;10902
SPBC30D10.07c|bpl1|II|biotin-protein	SPBC30D10.07c|bpl1|II|biotin-protein	3	3	3	>SPBC30D10.07c|bpl1|II|biotin-protein ligase Bpl1 (predicted)	1	3	3	3	2	2	2	2	2	2	6	6	6	70.631	631	631	0	18.176	By MS/MS	By MS/MS	4.3	3.6	5700400	2451400	3249100	0	3080400	2	2	4				708	1367;3629;6228	True;True;True	1429;3773;6521	2889;2890;7703;13703	2749;2750;7369;13199	2750;7369;13199
SPBC30D10.08|mgm101|II|mitochondrial	SPBC30D10.08|mgm101|II|mitochondrial	1	1	1	>SPBC30D10.08|mgm101|II|mitochondrial DNA repair protein (predicted)	1	1	1	1	1	1	1	1	1	1	4.4	4.4	4.4	31.178	270	270	0.0030612	6.6885	By matching	By MS/MS	4.4	4.4	14786000	6086200	8699500	0	8247900	0	1	1				709	133	TRUE	141	383;384	375	375
SPBC30D10.13c|pdb1|II|pyruvate	SPBC30D10.13c|pdb1|II|pyruvate	2	2	2	>SPBC30D10.13c|pdb1|II|pyruvate dehydrogenase e1 component beta subunit Pdb1	1	2	2	2	2	2	2	2	2	2	7.1	7.1	7.1	39.623	366	366	0	10.969	By MS/MS	By MS/MS	7.1	7.1	59349000	30673000	28676000	31020000	26840000	1	1	2				710	904;6249	True;True	950;6542	1937;1938;13740;13741	1853;13232	1853;13232
SPBC30D10.18c|rpl102|II|60S	SPBC30D10.18c|rpl102|II|60S	4	1	1	>SPBC30D10.18c|rpl102|II|60S ribosomal protein L10a	1	4	1	1	4	3	1	0	1	0	21.3	5.1	5.1	23.884	216	216	0.0021142	7.165	By MS/MS	By matching	21.3	16.2	1571900	1571900	0	1571900	0	1	0	1				711	2007;2089;2996;3397	True;False;False;False	2093;2176;2177;3118;3536	4462;4634;4635;6472;6473;7259;7260	4302;4460;4461;6206;6207;6965;6966	4302;4461;6206;6966	259	84
SPBC317.01|mbx2|II|MADS-box	SPBC317.01|mbx2|II|MADS-box	1	1	1	>SPBC317.01|mbx2|II|MADS-box transcription factor Pvg4	1	1	1	1	0	1	0	1	0	1	3.8	3.8	3.8	41.572	372	372	0.0021459	7.3082	By matching	By MS/MS	0	3.8	2345800	0	2345800	0	2224000	0	1	1				712	5535	TRUE	5797	12284	11833	11833
SPBC31A8.01c|rtn1|II|reticulon-like	SPBC31A8.01c|rtn1|II|reticulon-like	6	6	6	>SPBC31A8.01c|rtn1|II|reticulon-like protein Rtn1	1	6	6	6	6	6	6	6	6	6	24.4	24.4	24.4	33.659	308	308	0	66.305	By MS/MS	By MS/MS	24.4	24.4	51049000	28707000	22341000	22756000	27132000	4	6	10				713	1983;2176;2801;3862;4384;4828	True;True;True;True;True;True	2069;2266;2914;4011;4596;5062	4417;4418;4822;4823;6054;6055;8168;8169;9857;9858;10866;10867;10868	4257;4258;4636;4637;5791;7808;9536;9537;10495;10496	4257;4636;5791;7808;9536;10496
SPBC31F10.06c|sar1|II|ADP-ribosylation	SPBC31F10.06c|sar1|II|ADP-ribosylation	5	5	5	>SPBC31F10.06c|sar1|II|ADP-ribosylation factor Sar1	1	5	5	5	3	5	3	5	3	5	34.7	34.7	34.7	21.28	190	190	0	37.805	By MS/MS	By MS/MS	21.6	34.7	50411000	23198000	27213000	23268000	22253000	5	4	9				714	21;99;3086;3913;6092	True;True;True;True;True	21;105;3216;3217;4081;4082;6382	39;206;6666;6667;6668;8432;8433;8434;13445;13446	37;197;6392;6393;6394;8072;8073;8074;12943;12944	37;197;6393;8072;12944	260;261;262	23;48;116
SPBC31F10.10c|SPBC31F10.10c|II|zf-MYND	SPBC31F10.10c|SPBC31F10.10c|II|zf-MYND	1	1	1	>SPBC31F10.10c|SPBC31F10.10c|II|zf-MYND type zinc finger protein	1	1	1	1	1	1	1	1	1	1	2.4	2.4	2.4	64.142	574	574	0.0021552	7.3409	By matching	By MS/MS	2.4	2.4	3038500	1097900	1940600	0	1839800	0	1	1				715	5705	TRUE	5980	12663;12664	12203	12203
SPBC31F10.12|tma20|II|RNA-binding	SPBC31F10.12|tma20|II|RNA-binding	1	1	1	>SPBC31F10.12|tma20|II|RNA-binding protein Tma20 (predicted)	1	1	1	1	1	1	1	1	1	1	8.8	8.8	8.8	20.249	181	181	0.0023121	8.4138	By MS/MS	By matching	8.8	8.8	4968000	2800600	2167400	0	2054900	1	0	1				716	1772	TRUE	1847	3991;3992	3851	3851
SPBC31F10.13c|hip1|II|hira	SPBC31F10.13c|hip1|II|hira	2	2	2	>SPBC31F10.13c|hip1|II|hira protein, histone chaperone Hip1	1	2	2	2	1	2	1	2	1	2	2.9	2.9	2.9	103.69	932	932	0	14.781	By MS/MS	By MS/MS	1.1	2.9	2033300	971720	1061600	0	1006500	1	1	2				717	2092;5765	True;True	2180;6041	4640;4641;12782	4466;4467;12312	4466;12312
SPBC31F10.16|cfp1|II|ChAPs	SPBC31F10.16|cfp1|II|ChAPs	2	2	2	>SPBC31F10.16|cfp1|II|ChAPs family protein Cfp1	1	2	2	2	2	2	2	2	2	2	2.9	2.9	2.9	74.094	649	649	0	12.385	By MS/MS	By MS/MS	2.9	2.9	8036800	3093700	4943100	0	4686500	0	0	0				718	696;6602	True;True	731;6906	1519;1520;14489;14490	1461;13974;13975	1461;13975
SPBC32F12.03c|gpx1|II|glutathione	SPBC32F12.03c|gpx1|II|glutathione	4	4	4	>SPBC32F12.03c|gpx1|II|glutathione peroxidase Gpx1	1	4	4	4	4	1	4	1	4	1	34.2	34.2	34.2	18.06	158	158	0	28.375	By MS/MS	By MS/MS	34.2	11.4	16921000	11855000	5065500	11213000	0	3	1	4				719	2642;4323;4916;6627	True;True;True;True	2748;4533;5153;5154;6931	5754;9730;11034;11035;14547;14548	5500;9419;10645;10646;14034;14035	5500;9419;10646;14035
SPBC32F12.10|SPBC32F12.10|II|phosphoglucomutase	SPBC32F12.10|SPBC32F12.10|II|phosphoglucomutase	14	14	14	>SPBC32F12.10|SPBC32F12.10|II|phosphoglucomutase (predicted)	1	14	14	14	11	14	11	14	11	14	34.8	34.8	34.8	60.598	554	554	0	106.74	By MS/MS	By MS/MS	26.9	34.8	160530000	76312000	84221000	80811000	75350000	9	12	21				720	650;653;1027;1343;1652;2201;3638;3902;4316;5883;6414;6440;6462;6560	True;True;True;True;True;True;True;True;True;True;True;True;True;True	682;685;1077;1405;1722;2292;3783;4065;4526;6163;6709;6735;6759;6861	1425;1426;1432;1433;2189;2190;2847;2848;3574;4905;4906;7722;8396;8397;9718;9719;13026;13027;14123;14124;14169;14170;14215;14216;14393	1374;1375;1381;2096;2097;2707;2708;3434;4712;7385;8039;9405;9406;12539;12540;13632;13633;13674;13675;13718;13719;13883	1375;1381;2096;2707;3434;4712;7385;8039;9405;12540;13633;13675;13719;13883	263	1
SPBC32F12.11|tdh1|II|glyceraldehyde-3-phosphate	SPBC32F12.11|tdh1|II|glyceraldehyde-3-phosphate	25	25	15	>SPBC32F12.11|tdh1|II|glyceraldehyde-3-phosphate dehydrogenase Tdh1	1	25	25	15	25	25	25	25	15	15	72.9	72.9	42	35.869	336	336	0	323.31	By MS/MS	By MS/MS	72.9	72.9	12055000000	5820400000	6235000000	5249000000	5345500000	50	58	108				721	616;617;1301;1302;1662;3051;3706;3774;3775;3806;3807;4359;4723;5481;5891;5947;5948;5952;5954;5957;6104;6204;6205;6350;6411	True;True;True;True;True;True;True;True;True;True;True;True;True;True;True;True;True;True;True;True;True;True;True;True;True	645;646;647;648;1361;1362;1733;3180;3852;3922;3923;3954;3955;4570;4948;5736;5737;5738;6171;6228;6229;6233;6234;6236;6240;6394;6497;6498;6645;6706	1345;1346;1347;1348;1349;1350;1351;1352;1353;1354;1355;1356;2753;2754;2755;2756;2757;2758;3595;3596;6599;6600;7849;7850;7984;7985;7986;7987;7988;7989;7990;7991;7992;7993;7994;7995;8062;8063;8064;8065;9804;9805;10646;10647;10648;10649;12144;12145;12146;12147;12148;12149;12150;12151;13039;13040;13150;13151;13152;13153;13159;13160;13161;13162;13163;13164;13165;13166;13167;13168;13169;13170;13171;131…	1296;1297;1298;1299;1300;1301;1302;1303;1304;1305;1306;1307;1308;1309;2607;2608;2609;2610;2611;2612;3455;3456;3457;3458;6326;6327;7505;7506;7636;7637;7638;7639;7640;7641;7642;7643;7644;7645;7646;7647;7648;7708;7709;7710;7711;9491;9492;10272;10273;10274;10275;11692;11693;11694;11695;11696;11697;11698;11699;12552;12553;12657;12658;12659;12664;12665;12666;12667;12668;12669;12670;12671;12672;12673;12…	1298;1309;2607;2608;3456;6326;7505;7641;7646;7708;7710;9492;10275;11695;12552;12658;12659;12676;12688;12696;12964;13156;13159;13425;13628	264;265;266;267	43;46;130;175
SPBC32H8.12c|act1|II|actin	SPBC32H8.12c|act1|II|actin	20	20	20	>SPBC32H8.12c|act1|II|actin Act1	1	20	20	20	19	20	19	20	19	20	69.3	69.3	69.3	41.764	375	375	0	224.56	By MS/MS	By MS/MS	63.2	69.3	1791100000	818230000	972870000	742890000	833670000	24	27	51				722	162;389;502;503;763;773;818;1039;1526;2027;2102;2768;2816;3095;3882;4417;4418;5282;5653;5763	True;True;True;True;True;True;True;True;True;True;True;True;True;True;True;True;True;True;True;True	172;406;407;523;524;798;799;809;810;857;1091;1092;1595;2114;2190;2191;2880;2929;3226;4039;4040;4631;4632;5527;5924;6039	440;441;879;880;881;882;1111;1112;1113;1114;1652;1653;1654;1655;1669;1670;1671;1754;1755;2213;2214;2215;2216;3222;3223;4503;4504;4662;4663;4664;4665;4666;4667;5994;5995;6080;6081;6683;8328;8329;8330;8331;9927;9928;9929;9930;11733;11734;11735;11736;12554;12555;12556;12779;12780	432;851;852;853;854;1073;1074;1075;1076;1584;1585;1586;1587;1600;1601;1602;1603;1604;1683;2117;2118;2119;3070;4337;4338;4488;4489;4490;4491;4492;5729;5730;5814;5815;6408;7975;7976;7977;7978;9597;9598;9599;11300;11301;11302;11303;12093;12094;12095;12096;12309;12310	432;854;1073;1076;1587;1600;1683;2117;3070;4337;4489;5729;5814;6408;7978;9597;9599;11302;12094;12309	268;269;270;271;272;273;274;275	16;44;176;190;283;299;305;325
SPBC336.03|efc25|II|Ras1	SPBC336.03|efc25|II|Ras1	1	1	1	>SPBC336.03|efc25|II|Ras1 guanyl-nucleotide exchange factor Efc25	1	1	1	1	0	1	0	1	0	1	0.9	0.9	0.9	112.73	987	987	0.0059289	6.3089	By matching	By MS/MS	0	0.9	1128800	0	1128800	0	1070200	0	1	1				723	3740	TRUE	3887	7915	7570	7570
SPBC336.04|cdc6|II|DNA	SPBC336.04|cdc6|II|DNA	6	6	6	>SPBC336.04|cdc6|II|DNA polymerase delta catalytic subunit Cdc6	1	6	6	6	4	6	4	6	4	6	6.1	6.1	6.1	123.57	1086	1086	0	36.527	By MS/MS	By MS/MS	4.3	6.1	17191000	8157600	9033100	8578800	8142900	3	5	8				724	333;1835;5958;6178;6370;6679	True;True;True;True;True;True	349;1912;6241;6470;6665;6983	778;4125;4126;13190;13603;13604;13981;13982;14652;14653	760;3975;3976;12697;13098;13099;13464;13465;14131	760;3975;12697;13098;13464;14131
SPBC337.02c|SPBC337.02c|II|mug2/mug135/meu2;SPCC569.01c|SPCC569.01c|III|mug2/mug135/meu2;SPCP20C8.01c|SPCP20C8.01c|III|mug2/mug135/meu2	SPBC337.02c|SPBC337.02c|II|mug2/mug135/meu2;SPCC569.01c|SPCC569.01c|III|mug2/mug135/meu2;SPCP20C8.01c|SPCP20C8.01c|III|mug2/mug135/meu2	5;5;4	5;5;4	3;3;2	>SPBC337.02c|SPBC337.02c|II|mug2/mug135/meu2 family;>SPCC569.01c|SPCC569.01c|III|mug2/mug135/meu2 family;>SPCP20C8.01c|SPCP20C8.01c|III|mug2/mug135/meu2 family	3	5	5	3	5	3	5	3	3	1	15.7	15.7	10.5	35.999	305	305;323;247	0	39.326	By MS/MS	By MS/MS	15.7	8.9	38958000	23129000	15828000	23296000	14840000	6	3	9				725	446;1041;2350;3238;6319	True;True;True;True;True	466;1094;2444;3374;6613	991;992;993;994;2218;5196;6966;6967;13873;13874	961;962;963;2121;4967;6681;6682;13360;13361	961;2121;4967;6681;13361
SPBC337.05c|cct8|II|chaperonin-containing	SPBC337.05c|cct8|II|chaperonin-containing	17	17	17	>SPBC337.05c|cct8|II|chaperonin-containing T-complex theta subunit Cct8	1	17	17	17	14	17	14	17	14	17	34.2	34.2	34.2	59.955	546	546	0	117.21	By MS/MS	By MS/MS	28.6	34.2	114800000	52563000	62242000	58572000	53002000	12	16	28				726	214;242;431;891;1074;1328;1493;2609;3302;3895;4637;5483;5591;5714;5778;6222;6255	True;True;True;True;True;True;True;True;True;True;True;True;True;True;True;True;True	225;254;450;937;1129;1388;1561;2714;3439;4057;4860;5740;5857;5989;6054;6515;6548	536;537;590;960;961;1901;1902;2297;2298;2299;2812;2813;3156;3157;5698;5699;7086;8380;8381;10472;10473;12154;12155;12438;12439;12683;12820;12821;13692;13693;13751;13752	523;524;575;928;929;1817;1818;2196;2197;2198;2661;2662;3008;3009;5445;5446;6803;8026;8027;10111;10112;11702;11703;11982;12223;12353;13188;13189;13241;13242	523;575;929;1817;2198;2662;3009;5445;6803;8026;10111;11702;11982;12223;12353;13189;13241	276	120
SPBC337.09|erg28|II|Erg28	SPBC337.09|erg28|II|Erg28	2	2	2	>SPBC337.09|erg28|II|Erg28 protein (predicted)	1	2	2	2	2	2	2	2	2	2	19.9	19.9	19.9	15.252	136	136	0	14.759	By MS/MS	By MS/MS	19.9	19.9	5095500	2542800	2552700	2535300	2427700	1	1	2				727	5387;6281	True;True	5638;6575	11935;11936;13801;13802	11490;13289	11490;13289
SPBC337.16|cho1|II|phosphatidyl-N-dimethylethanolamine	SPBC337.16|cho1|II|phosphatidyl-N-dimethylethanolamine	1	1	1	>SPBC337.16|cho1|II|phosphatidyl-N-dimethylethanolamine N-methyltransferase	1	1	1	1	1	1	1	1	1	1	4.1	4.1	4.1	24.767	221	221	0.0021716	7.4217	By MS/MS	By MS/MS	4.1	4.1	9237100	2421800	6815300	0	6461500	1	1	2				728	735	TRUE	770	1595;1596;1597	1530;1531	1531
SPBC342.02|qrs1|II|cytoplasmic	SPBC342.02|qrs1|II|cytoplasmic	1	1	1	>SPBC342.02|qrs1|II|cytoplasmic glutaminyl-tRNA ligase Qrs1 (predicted)	1	1	1	1	0	1	0	1	0	1	1.4	1.4	1.4	92.072	811	811	0.002103	7.1016	By matching	By MS/MS	0	1.4	0	0	0	0	0	0	1	1				729	3716	TRUE	3862	7873	7528	7528
SPBC354.01|gtp1|II|GTP	SPBC354.01|gtp1|II|GTP	4	4	4	>SPBC354.01|gtp1|II|GTP binding protein Gtp1, implicated in cytoplasmic translation (predicted)	1	4	4	4	3	4	3	4	3	4	10.7	10.7	10.7	40.749	363	363	0	23.054	By MS/MS	By MS/MS	8	10.7	6844100	3237100	3607000	3379600	3277300	2	4	6				730	2213;3507;5736;6380	True;True;True;True	2304;3649;6011;6675	4933;4934;7469;7470;12724;12725;13999	4736;4737;7157;7158;12260;12261;13482	4737;7158;12260;13482
SPBC354.07c|SPBC354.07c|II|oxysterol	SPBC354.07c|SPBC354.07c|II|oxysterol	5	5	5	>SPBC354.07c|SPBC354.07c|II|oxysterol binding protein (predicted)	1	5	5	5	4	4	4	4	4	4	16.9	16.9	16.9	45.066	397	397	0	36.609	By MS/MS	By MS/MS	12.1	12.6	14541000	8002100	6538900	7026500	7175000	3	4	7				731	1245;2908;2956;5700;6366	True;True;True;True;True	1304;3026;3074;5975;6661	2645;6277;6278;6365;12654;12655;13975;13976	2511;6008;6009;6088;12193;12194;13458;13459	2511;6009;6088;12193;13458
SPBC354.12|gpd3|II|glyceraldehyde	SPBC354.12|gpd3|II|glyceraldehyde	20	10	10	>SPBC354.12|gpd3|II|glyceraldehyde 3-phosphate dehydrogenase Gpd3	1	20	10	10	20	20	10	10	10	10	69.6	36.1	36.1	35.674	335	335	0	88.29	By MS/MS	By MS/MS	69.6	69.6	1038400000	496370000	542010000	448890000	456640000	19	16	35				732	615;1662;2691;3051;3706;3772;3773;3805;3987;4359;5891;5947;5952;5954;5957;6104;6206;6207;6346;6412	True;False;True;False;False;True;True;True;True;False;False;False;False;False;False;False;True;True;True;True	643;644;1733;2799;2800;2801;3180;3852;3920;3921;3953;4176;4570;6171;6228;6233;6234;6236;6240;6394;6499;6500;6641;6707	1341;1342;1343;1344;3595;3596;5854;5855;5856;5857;5858;6599;6600;7849;7850;7976;7977;7978;7979;7980;7981;7982;7983;8056;8057;8058;8059;8060;8061;8999;9000;9804;9805;13039;13040;13150;13151;13159;13160;13161;13162;13163;13164;13165;13166;13167;13168;13169;13170;13171;13172;13173;13174;13175;13176;13177;13180;13181;13188;13189;13466;13467;13468;13469;13665;13666;13667;13668;13928;13929;13930;13931;…	1292;1293;1294;1295;3455;3456;3457;3458;5593;5594;5595;5596;5597;5598;6326;6327;7505;7506;7628;7629;7630;7631;7632;7633;7634;7635;7702;7703;7704;7705;7706;7707;8722;8723;9491;9492;12552;12553;12657;12658;12664;12665;12666;12667;12668;12669;12670;12671;12672;12673;12674;12675;12676;12677;12678;12679;12680;12681;12682;12683;12686;12687;12688;12696;12963;12964;12965;12966;12967;13160;13161;13162;131…	1295;3456;5598;6326;7505;7628;7632;7703;8722;9492;12552;12658;12676;12688;12696;12964;13160;13162;13416;13629	267;277;278;279	43;46;130;175
SPBC36.05c|clr6|II|histone	SPBC36.05c|clr6|II|histone	9	9	9	>SPBC36.05c|clr6|II|histone deacetylase (class I) Clr6	1	9	9	9	8	9	8	9	8	9	29.9	29.9	29.9	46.111	405	405	0	107	By MS/MS	By MS/MS	26.9	29.9	136840000	50390000	86448000	58697000	73653000	9	7	16				733	578;912;1361;3531;3532;3965;4319;4640;4859	True;True;True;True;True;True;True;True;True	602;958;1423;3675;3676;4151;4529;4863;5094	1254;1255;1256;1257;1950;1951;2879;7520;7521;7522;7523;8694;8695;9724;9725;10477;10478;10924;10925	1204;1205;1206;1864;1865;2738;7209;7210;7211;7212;8350;8351;9413;9414;10117;10118;10545;10546	1206;1865;2738;7210;7211;8350;9413;10118;10546
SPBC36.07|elp1|II|elongator	SPBC36.07|elp1|II|elongator	6	6	6	>SPBC36.07|elp1|II|elongator subunit Elp1 (predicted)	1	6	6	6	6	6	6	6	6	6	5.5	5.5	5.5	141.61	1253	1253	0	41.742	By MS/MS	By MS/MS	5.5	5.5	40119000	15952000	24168000	18043000	20822000	6	6	12				734	1359;1609;2136;3120;4092;5830	True;True;True;True;True;True	1421;1679;2225;3251;4285;6109	2875;2876;3495;3496;4733;4734;6732;6733;9222;9223;12922;12923	2734;2735;3362;3363;4553;4554;6457;6458;8935;8936;12441;12442	2734;3362;4554;6457;8936;12441
SPBC365.01|crs103|II|sec14	SPBC365.01|crs103|II|sec14	2	2	2	>SPBC365.01|crs103|II|sec14 cytosolic factor family, glycerophospholipid-transfer protein Crs103 (predicted)	1	2	2	2	1	2	1	2	1	2	7.3	7.3	7.3	41.015	355	355	0	10.729	By MS/MS	By MS/MS	3.9	7.3	195800000	106560000	89237000	0	84605000	1	1	2				735	3251;3871	True;True	3387;4023	6994;6995;8190	6708;6709;7831	6708;7831
SPBC365.03c|rpl2101|II|60S	SPBC365.03c|rpl2101|II|60S	4	1	1	>SPBC365.03c|rpl2101|II|60S ribosomal protein L21 (predicted)	1	4	1	1	4	4	1	1	1	1	28.8	14.4	14.4	18.38	160	160	0	26.126	By MS/MS	By MS/MS	28.8	28.8	51731000	24887000	26844000	0	25450000	1	1	2				736	196;591;4346;5878	True;False;False;False	206;616;4557;6158	502;503;1279;1280;9781;9782;13017;13018	492;493;1227;1228;9470;9471;12532;12533	493;1227;9471;12533
SPBC365.15|alp4|II|gamma	SPBC365.15|alp4|II|gamma	2	2	2	>SPBC365.15|alp4|II|gamma tubulin complex Spc97/GCP2 subunit Alp4	1	2	2	2	2	2	2	2	2	2	2.3	2.3	2.3	90.157	784	784	0	11.198	By MS/MS	By MS/MS	2.3	2.3	10454000	5168200	5285800	0	5011400	1	1	2				737	2353;4631	True;True	2447;4854	5201;5202;10462;10463	4973;10102;10103	4973;10103
SPBC36B7.02|SPBC36B7.02|II|Svf1	SPBC36B7.02|SPBC36B7.02|II|Svf1	1	1	1	>SPBC36B7.02|SPBC36B7.02|II|Svf1 family protein Svf2	1	1	1	1	1	1	1	1	1	1	4	4	4	40.333	353	353	0.0067764	6.1837	By matching	By MS/MS	4	4	3482000	1615800	1866200	0	1769300	0	1	1				738	4282	TRUE	4488	9617;9618	9305	9305
SPBC3B8.03|lys9|II|saccharopine	SPBC3B8.03|lys9|II|saccharopine	10	10	10	>SPBC3B8.03|lys9|II|saccharopine dehydrogenase (predicted)	1	10	10	10	9	9	9	9	9	9	31.8	31.8	31.8	49.938	450	450	0	72.97	By MS/MS	By MS/MS	29.3	26.9	148150000	77415000	70740000	71385000	72580000	8	9	17				739	83;212;523;1979;3090;3867;4352;4856;6329;6589	True;True;True;True;True;True;True;True;True;True	87;223;546;2065;3221;4018;4563;5091;6623;6892	171;172;173;532;533;1160;4409;4410;6675;8180;8181;9790;9791;10919;10920;13893;13894;14459;14460;14461	162;163;519;520;1117;4249;4250;6401;7821;7822;9478;9479;9480;10541;13381;13382;13949;13950	162;520;1117;4250;6401;7822;9480;10541;13382;13949
SPBC3B8.07c|dsd1|II|dihydroceramide	SPBC3B8.07c|dsd1|II|dihydroceramide	1	1	1	>SPBC3B8.07c|dsd1|II|dihydroceramide delta-4 desaturase	1	1	1	1	1	1	1	1	1	1	3.3	3.3	3.3	41.81	362	362	0.0021254	7.2079	By MS/MS	By MS/MS	3.3	3.3	3737500	1299400	2438100	0	2311500	0	1	1				740	100	TRUE	106	207;208	198;199	199
SPBC3B9.01|fes1|II|Hsp70	SPBC3B9.01|fes1|II|Hsp70	4	4	4	>SPBC3B9.01|fes1|II|Hsp70 nucleotide exchange factor Fes1 (predicted)	1	4	4	4	3	4	3	4	3	4	14.3	14.3	14.3	32.744	287	287	0	24.11	By MS/MS	By MS/MS	9.8	14.3	13614000	6744400	6869600	6416200	6841200	1	3	4				741	2546;4815;6048;6165	True;True;True;True	2646;5048;6332;6457	5572;5573;10840;13352;13353;13579;13580	5330;5331;10468;12855;13073	5330;10468;12855;13073
SPBC3B9.19|mge1|II|mitochondrial	SPBC3B9.19|mge1|II|mitochondrial	2	2	2	>SPBC3B9.19|mge1|II|mitochondrial GrpE domain chaperone protein (predicted)	1	2	2	2	2	2	2	2	2	2	8.1	8.1	8.1	25.334	223	223	0	12.776	By MS/MS	By MS/MS	8.1	8.1	20385000	9208800	11176000	8930500	10875000	2	2	4				742	742;5865	True;True	777;6145	1609;1610;12990;12991	1544;1545;12507;12508	1544;12507
SPBC3D6.02|but2|II|But2	SPBC3D6.02|but2|II|But2	3	3	3	>SPBC3D6.02|but2|II|But2 family protein But2	1	3	3	3	2	3	2	3	2	3	9.5	9.5	9.5	43.625	390	390	0	20.682	By MS/MS	By MS/MS	6.2	9.5	29365000	13667000	15698000	13485000	15065000	2	2	4				743	3128;5075;6677	True;True;True	3259;5315;6981	6745;6746;11338;14648;14649	6468;6469;10931;14128	6469;10931;14128
SPBC3D6.06c|prs5|II|ribose-phosphate	SPBC3D6.06c|prs5|II|ribose-phosphate	1	1	1	>SPBC3D6.06c|prs5|II|ribose-phosphate pyrophosphokinase Prs5 (predicted)	1	1	1	1	1	1	1	1	1	1	5	5	5	37.338	341	341	0	15.007	By MS/MS	By MS/MS	5	5	9988100	3820500	6167600	0	5847400	1	1	2				744	5752	TRUE	6028	12759;12760	12291;12292	12292
SPBC3E7.02c|hsp16|II|heat	SPBC3E7.02c|hsp16|II|heat	1	1	1	>SPBC3E7.02c|hsp16|II|heat shock protein Hsp16	1	1	1	1	1	1	1	1	1	1	7.7	7.7	7.7	15.968	143	143	0.0031315	6.9832	By MS/MS	By MS/MS	7.7	7.7	11895000	0	11895000	0	11278000	1	1	2				745	3712	TRUE	3858	7864;7865	7521;7522	7521
SPBC3E7.05c|mic60|II|MICOS	SPBC3E7.05c|mic60|II|MICOS	5	5	5	>SPBC3E7.05c|mic60|II|MICOS complex subunit Mic60 (predicted)	1	5	5	5	4	4	4	4	4	4	10.4	10.4	10.4	63.214	550	550	0	33.731	By MS/MS	By MS/MS	8	9.1	1078900000	481640000	597250000	0	566250000	2	3	5				746	2684;3587;4019;4919;4949	True;True;True;True;True	2791;3731;4209;5157;5187	5841;5842;7628;9059;9060;11039;11103;11104	5581;5582;7305;8779;10650;10711	5581;7305;8779;10650;10711
SPBC3E7.10|fma1|II|methionine	SPBC3E7.10|fma1|II|methionine	4	4	4	>SPBC3E7.10|fma1|II|methionine aminopeptidase Fma1 (predicted)	1	4	4	4	3	4	3	4	3	4	15.3	15.3	15.3	42.139	379	379	0	32.765	By MS/MS	By MS/MS	10.8	15.3	28564000	12055000	16509000	13894000	13385000	3	2	5				747	210;1235;1385;3551	True;True;True;True	221;1294;1450;3695	528;529;530;2626;2627;2952;7559;7560	516;517;2491;2492;2809;7243	517;2491;2809;7243
SPBC3E7.16c|leu3|II|2-isopropylmalate	SPBC3E7.16c|leu3|II|2-isopropylmalate	10	10	10	>SPBC3E7.16c|leu3|II|2-isopropylmalate synthase Leu3	1	10	10	10	7	9	7	9	7	9	24.7	24.7	24.7	64.041	584	584	0	63.991	By MS/MS	By MS/MS	19	20.9	79933000	38100000	41833000	38039000	39722000	5	7	12				748	338;1025;1741;1933;2157;2199;2373;3368;6108;6336	True;True;True;True;True;True;True;True;True;True	354;1075;1815;2019;2247;2290;2468;3506;6398;6630	786;787;2185;2186;3755;4317;4784;4902;4903;5246;5247;7205;13476;13477;13907;13908	767;768;2092;2093;3615;4167;4604;4710;5015;6913;12974;12975;13395;13396	768;2092;3615;4167;4604;4710;5015;6913;12974;13396
SPBC3F6.01c|SPBC3F6.01c|II|serine/threonine	SPBC3F6.01c|SPBC3F6.01c|II|serine/threonine	1	1	1	>SPBC3F6.01c|SPBC3F6.01c|II|serine/threonine protein phosphatase (predicted)	1	1	1	1	0	1	0	1	0	1	2.3	2.3	2.3	53.29	473	473	0.0030992	6.8841	By matching	By MS/MS	0	2.3	0	0	0	0	0	0	1	1				749	3476	TRUE	3616	7411	7103	7103
SPBC3F6.02c|erg26|II|3	SPBC3F6.02c|erg26|II|3	2	2	2	>SPBC3F6.02c|erg26|II|3 beta-hydroxysteroid dehydrogenase/delta 5-->4-isomerase Erg26 (predicted)	1	2	2	2	1	2	1	2	1	2	7.4	7.4	7.4	38.317	340	340	0	15.046	By MS/MS	By MS/MS	4.1	7.4	7608400	2636200	4972300	0	4714100	1	3	4				750	4619;6232	True;True	4842;6525	10441;10442;13710;13711	10080;10081;13206;13207	10080;13207
SPBC3H7.03c|kgd1|II|2-oxoglutarate	SPBC3H7.03c|kgd1|II|2-oxoglutarate	5	5	5	>SPBC3H7.03c|kgd1|II|2-oxoglutarate dehydrogenase (lipoamide) (e1 component of oxoglutarate dehydrogenase complex) (predicted)	1	5	5	5	5	3	5	3	5	3	5.2	5.2	5.2	114.16	1009	1009	0	32.763	By MS/MS	By MS/MS	5.2	3.3	10707000	5680100	5027400	5635500	4811000	5	1	6				751	366;2834;2944;3514;3681	True;True;True;True;True	382;2947;3062;3656;3827	838;839;6114;6341;6342;7482;7803;7804	813;5846;6065;6066;7169;7461	813;5846;6065;7169;7461
SPBC3H7.15|hhp1|II|serine/threonine;SPBP35G2.05c|cki2|II|serine/threonine;SPBC1347.06c|cki1|II|serine/threonine	SPBC3H7.15|hhp1|II|serine/threonine	12;1;1	10;1;1	9;0;0	>SPBC3H7.15|hhp1|II|serine/threonine protein kinase Hhp1	3	12	10	9	12	10	10	8	9	7	32.9	27.7	25.2	42.45	365	365;435;446	0	72.202	By MS/MS	By MS/MS	32.9	28.2	165500000	91001000	74503000	81498000	72537000	13	9	22				752	267;691;1708;1918;2196;2372;2585;2737;4164;5441;5683;6384	True;True;True;True;True;True;True;True;False;True;False;True	280;724;725;1782;2002;2287;2467;2688;2849;4359;5695;5955;6679	642;643;1508;1509;3696;3697;4283;4284;4896;4897;5245;5650;5651;5943;9357;9358;12043;12044;12619;12620;14005;14006;14007;14008	624;625;1452;1453;3557;3558;3559;4138;4139;4705;4706;5014;5402;5403;5683;9064;11597;11598;12155;12156;13488;13489;13490;13491;13492	625;1453;3557;4138;4705;5014;5403;5683;9064;11598;12156;13490	280	138
SPBC4.02c|SPBC4.02c|II|conserved	SPBC4.02c|SPBC4.02c|II|conserved	3	3	3	>SPBC4.02c|SPBC4.02c|II|conserved fungal protein	1	3	3	3	3	3	3	3	3	3	6.4	6.4	6.4	50.01	437	437	0	18.267	By MS/MS	By MS/MS	6.4	6.4	9762300	2651000	7111300	0	5574900	2	2	4				753	1811;3821;3824	True;True;True	1887;3970;3973	4075;4076;8094;8095;8096;8101;8102	3927;3928;7738;7739;7744	3928;7739;7744
SPBC4.03c|SPBC4.03c|II|COPII-coated	SPBC4.03c|SPBC4.03c|II|COPII-coated	2	2	2	>SPBC4.03c|SPBC4.03c|II|COPII-coated vesicle component Sfb3 (predicted)	1	2	2	2	2	2	2	2	2	2	2.9	2.9	2.9	98.068	891	891	0	13.296	By MS/MS	By MS/MS	2.9	2.9	15413000	9270100	6142700	7153500	7940400	1	2	3				754	4147;5281	True;True	4340;5526	9325;9326;11731;11732	9032;9033;11299	9032;11299
SPBC4.06|SPBC4.06|II|acid	SPBC4.06|SPBC4.06|II|acid	2	2	2	>SPBC4.06|SPBC4.06|II|acid phosphatase (predicted)	1	2	2	2	1	2	1	2	1	2	3.5	3.5	3.5	51.975	462	462	0	12.823	By MS/MS	By MS/MS	1.5	3.5	5052600	2788000	2264700	0	2147100	0	2	2				755	3832;6543	True;True	3981;6843	8114;14361;14362	7757;13856;13857	7757;13857
SPBC4.07c|rpt2|II|19S	SPBC4.07c|rpt2|II|19S	8	8	8	>SPBC4.07c|rpt2|II|19S proteasome regulatory subunit Rpt2	1	8	8	8	4	7	4	7	4	7	18.1	18.1	18.1	50.06	448	448	0	56.298	By MS/MS	By MS/MS	10	16.3	40028000	14014000	26014000	18284000	20393000	4	5	9				756	259;490;1972;2418;2702;3555;6239;6427	True;True;True;True;True;True;True;True	272;511;2058;2515;2814;3699;6532;6722	625;626;1090;1091;4397;5329;5885;5886;7567;13724;14148	607;608;1051;1052;1053;4238;5092;5626;5627;7250;13217;13655	608;1052;4238;5092;5627;7250;13217;13655
SPBC405.01|ade1|II|phosphoribosylamine-glycine	SPBC405.01|ade1|II|phosphoribosylamine-glycine	3	3	3	>SPBC405.01|ade1|II|phosphoribosylamine-glycine ligase/phosphoribosylformylglycinamidine cyclo-ligase	1	3	3	3	3	3	3	3	3	3	5.3	5.3	5.3	85.23	788	788	0	19.807	By MS/MS	By MS/MS	5.3	5.3	15316000	6212900	9102800	5945900	8897300	1	2	3				757	1675;3098;6164	True;True;True	1748;3229;6456	3622;3623;6688;6689;13577;13578	3483;6413;6414;13072	3483;6413;13072
SPCC970.05|rpl3601|III|60S;SPBC405.07|rpl3602|II|60S	SPCC970.05|rpl3601|III|60S;SPBC405.07|rpl3602|II|60S	1;1	1;1	1;1	>SPCC970.05|rpl3601|III|60S ribosomal protein L36;>SPBC405.07|rpl3602|II|60S ribosomal protein L36	2	1	1	1	1	1	1	1	1	1	10.1	10.1	10.1	11.263	99	99;99	0.0021645	7.3855	By MS/MS	By MS/MS	10.1	10.1	2971900	2971900	0	2971900	0	1	1	2				758	394	TRUE	412	889;890	861;862	861
[truncated: 298 more rows]

## Sheet: E150924_LFQ
Accession No	Peptide count, strain KS7669 plusLMB	Peptide count, strain KS7669 minusLMB	Mol. weight [kDa]	Score	LFQ intensity, strain KS7669 plusLMB	LFQ intensity, strain KS7669 minusLMB	LFQ intensity sum (KS7669 minusLMB + KS7669 plusLMB)	LFQ ratio (KS7669 minusLMB / KS7669 plusLMB)	Protein Name
[truncated: 1,027 more rows]

[truncated: 2 more sheets: E151106_all, E151106_LFQ]
