# Supplementary material for: Exportin Crm1 is repurposed as a docking protein to generate microtubule organizing centers at the nuclear pore
Source: eLife. 2018 May 29;7:e33465. doi: 10.7554/eLife.33465 (PMC6008054; doi:10.7554/eLife.33465)
Supplement: Supplementary file 5. [file elife-33465-supp5.xlsx]

## Sheet: E160419_all
Protein IDs	Majority protein IDs	Peptide counts (all)	Peptide counts (razor+unique)	Peptide counts (unique)	Fasta headers	Number of proteins	Peptides	Razor + unique peptides	Unique peptides	Peptides KS7611	Peptides KS8573	Razor + unique peptides KS7611	Razor + unique peptides KS8573	Unique peptides KS7611	Unique peptides KS8573	Sequence coverage [%]	Unique + razor sequence coverage [%]	Unique sequence coverage [%]	Mol. weight [kDa]	Sequence length	Sequence lengths	Q-value	Score	Identification type KS7611	Identification type KS8573	Sequence coverage KS7611 [%]	Sequence coverage KS8573 [%]	Intensity	Intensity KS7611	Intensity KS8573	LFQ intensity KS7611	LFQ intensity KS8573	MS/MS Count KS7611	MS/MS Count KS8573	MS/MS Count	Only identified by site	Reverse	Potential contaminant	id	Peptide IDs	Peptide is razor	Mod. peptide IDs	Evidence IDs	MS/MS IDs	Best MS/MS	Oxidation (M) site IDs	Oxidation (M) site positions
SPAC1002.03c|gls2|I|glucosidase	SPAC1002.03c|gls2|I|glucosidase	4	4	4	>SPAC1002.03c|gls2|I|glucosidase II alpha subunit Gls2	1	4	4	4	3	3	3	3	3	3	4.9	4.9	4.9	106.28	923	923	0	8.8376	By MS/MS	By MS/MS	3.9	3.3	21712000	8061300	13651000	6693700	14332000	2	3	5				40	640;1528;1635;3604	True;True;True;True	660;1564;1674;3723	1375;3234;3235;3490;3491;7847	1296;3045;3046;3291;7471	1296;3045;3291;7471
SPAC1002.09c|dld1|I|dihydrolipoamide	SPAC1002.09c|dld1|I|dihydrolipoamide	7	7	7	>SPAC1002.09c|dld1|I|dihydrolipoamide dehydrogenase Dld1	1	7	7	7	6	5	6	5	6	5	19.6	19.6	19.6	54.731	511	511	0	8.8683	By MS/MS	By MS/MS	16.8	14.7	47136000	16300000	30836000	26727000	18858000	5	5	10				41	73;1687;2073;2354;3342;4824;4982	True;True;True;True;True;True;True	80;1729;2118;2410;3453;4983;5145	170;3599;3600;4352;4353;4935;4936;7267;7268;10491;10782	164;3398;3399;4130;4131;4132;4683;6915;9950;10243	164;3399;4130;4683;6915;9950;10243
SPAC1002.17c|urg2|I|uracil	SPAC1002.17c|urg2|I|uracil	4	4	4	>SPAC1002.17c|urg2|I|uracil phosphoribosyltransferase (predicted)	1	4	4	4	3	3	3	3	3	3	26.5	26.5	26.5	22.083	204	204	0	8.41	By MS/MS	By MS/MS	19.6	20.1	72086000	17913000	54173000	25671000	43689000	3	2	5				42	1359;1749;4250;4898	True;True;True;True	1395;1792;4385;5060	2819;2820;3725;9230;9231;10637	2664;3526;8769;8770;10097	2664;3526;8769;10097
SPAC1002.18|urg3|I|DUF1688	SPAC1002.18|urg3|I|DUF1688	2	2	2	>SPAC1002.18|urg3|I|DUF1688 family protein	1	2	2	2	0	2	0	2	0	2	6.3	6.3	6.3	44.21	399	399	0	4.6354	By matching	By MS/MS	0	6.3	2738400	0	2738400	0	2600600	0	2	2				43	2889;2968	True;True	2965;3047	6025;6179	5729;5876	5729;5876
SPAC1002.19|urg1|I|GTP	SPAC1002.19|urg1|I|GTP	10	10	10	>SPAC1002.19|urg1|I|GTP cyclohydrolase II Urg1 (predicted)	1	10	10	10	9	10	9	10	9	10	31.7	31.7	31.7	49.034	439	439	0	46.937	By MS/MS	By MS/MS	28	31.7	315760000	153400000	162350000	133930000	171290000	11	11	22				44	173;268;1230;1329;1995;3816;4277;4688;4763;5315	True;True;True;True;True;True;True;True;True;True	181;277;1264;1364;1365;2040;3943;4414;4841;4920;5485	462;463;464;644;645;2552;2553;2761;2762;2763;4212;8387;8388;9289;9290;10218;10219;10364;10365;10366;10367;11540;11541	427;428;429;605;606;2413;2414;2607;2608;2609;3996;7986;8822;8823;9695;9696;9831;9832;9833;9834;10991;10992;10993	428;605;2413;2608;3996;7986;8822;9695;9832;10991	31	360
SPAC1006.01|psp3|I|vacuolar	SPAC1006.01|psp3|I|vacuolar	1	1	1	>SPAC1006.01|psp3|I|vacuolar serine protease Psp3 (predicted)	1	1	1	1	1	1	1	1	1	1	1.6	1.6	1.6	48.732	451	451	0.0033632	1.3658	By MS/MS	By MS/MS	1.6	1.6	1580900	0	1580900	0	1501300	1	1	2				45	1546	TRUE	1583	3314;3315	3116;3117	3117
SPAC1006.07|SPAC1006.07|I|translation	SPAC1006.07|SPAC1006.07|I|translation	8	8	8	>SPAC1006.07|SPAC1006.07|I|translation initiation factor eIF4A (predicted)	1	8	8	8	4	8	4	8	4	8	30.4	30.4	30.4	44.436	392	392	0	28.799	By MS/MS	By MS/MS	13	30.4	116850000	32718000	84129000	48493000	64122000	3	7	10				46	215;309;1574;2150;2393;3639;4354;4724	True;True;True;True;True;True;True;True	223;320;1611;2199;2449;3758;4492;4881	539;540;713;714;3372;4518;4519;5013;7915;9434;9435;10294	505;506;673;674;3174;4288;4289;4760;7538;8964;9765	505;673;3174;4288;4760;7538;8964;9765
SPAC1006.09|win1|I|MAP	SPAC1006.09|win1|I|MAP	2	2	2	>SPAC1006.09|win1|I|MAP kinase kinase kinase Win1	1	2	2	2	2	2	2	2	2	2	1.4	1.4	1.4	163.27	1436	1436	0	4.7092	By MS/MS	By MS/MS	1.4	1.4	12618000	5345200	7273100	0	6907200	2	2	4				47	2540;2886	True;True	2608;2962	5342;5343;6019;6020	5075;5076;5724;5725	5076;5725
SPAC105.03c|SPAC105.03c|I|transcription	SPAC105.03c|SPAC105.03c|I|transcription	1	1	1	>SPAC105.03c|SPAC105.03c|I|transcription factor (predicted)	1	1	1	1	0	1	0	1	0	1	1	1	1	80.989	708	708	0.0085288	0.9927	By matching	By MS/MS	0	1	973160	0	973160	0	924200	0	1	1				48	2756	TRUE	2830	5765	5478	5478
SPAC1071.10c|pma1|I|P-type;SPCC1020.01c|pma2|III|P-type	SPAC1071.10c|pma1|I|P-type	25;5	25;5	25;5	>SPAC1071.10c|pma1|I|P-type proton ATPase, P3-type Pma1	2	25	25	25	23	25	23	25	23	25	33.9	33.9	33.9	99.883	919	919;1010	0	275.23	By MS/MS	By MS/MS	30.1	33.9	3967900000	2006100000	1961800000	2037200000	1757200000	29	33	62				49	64;475;870;901;1450;1471;1512;1578;1579;1748;1915;2382;2583;2715;3035;3263;3296;3828;3865;4014;4612;4613;4821;5030;5206	True;True;True;True;True;True;True;True;True;True;True;True;True;True;True;True;True;True;True;True;True;True;True;True;True	70;490;899;930;1486;1507;1548;1615;1616;1790;1791;1959;2438;2653;2789;3114;3361;3362;3404;3405;3955;3956;3993;4147;4763;4764;4980;5195;5374	144;145;1032;1822;1823;1889;1890;1891;1892;3067;3068;3069;3070;3119;3120;3200;3201;3379;3380;3381;3382;3721;3722;3723;3724;4058;4059;4060;4061;4989;4990;4991;4992;5425;5684;5685;6304;6305;6878;6879;6880;6974;6975;6976;6977;8410;8411;8412;8413;8475;8476;8477;8478;8773;8774;8775;8776;10024;10025;10026;10027;10028;10029;10485;10486;10879;10880;11209;11210	140;141;968;1724;1725;1790;1791;1792;1793;2891;2892;2893;2938;3013;3014;3180;3181;3182;3183;3522;3523;3524;3525;3851;3852;3853;3854;4739;4740;5154;5403;5995;5996;6529;6530;6531;6635;6636;6637;6638;8002;8003;8004;8005;8063;8064;8065;8066;8338;8339;8340;9514;9515;9516;9517;9518;9519;9944;9945;10332;10333;10656;10657	141;968;1725;1791;2892;2938;3014;3181;3183;3525;3854;4740;5154;5403;5995;6531;6637;8003;8066;8339;9514;9519;9944;10332;10656	32;33;34;35;36;37	82;256;554;590;629;686
SPAC1093.06c|dhc1|I|minus-end	SPAC1093.06c|dhc1|I|minus-end	1	1	1	>SPAC1093.06c|dhc1|I|minus-end directed microtubule motor, dynein heavy chain Dhc1	1	1	1	1	1	1	1	1	1	1	0.2	0.2	0.2	484.31	4196	4196	0	1.8689	By MS/MS	By MS/MS	0.2	0.2	8448500	4954100	3494400	0	3318600	1	1	2				50	3594	TRUE	3713	7825;7826	7449;7450	7449
SPAC10F6.01c|sir1|I|sulfite	SPAC10F6.01c|sir1|I|sulfite	27	27	27	>SPAC10F6.01c|sir1|I|sulfite reductase beta subunit Sir1	1	27	27	27	22	24	22	24	22	24	24.2	24.2	24.2	163.84	1473	1473	0	76.956	By MS/MS	By MS/MS	20.2	20.6	346190000	163970000	182220000	163550000	163010000	22	25	47				51	104;213;273;454;733;857;886;931;1437;2612;2748;2764;2765;2933;3119;3567;3673;3690;3696;3777;4514;4670;4903;4964;5197;5267;5407	True;True;True;True;True;True;True;True;True;True;True;True;True;True;True;True;True;True;True;True;True;True;True;True;True;True;True	111;221;282;468;757;886;915;960;1473;2682;2822;2838;2839;3011;3199;3684;3793;3794;3811;3817;3901;4660;4822;5065;5127;5365;5436;5580	344;536;652;984;985;1563;1564;1799;1800;1856;1857;1951;1952;3041;5468;5469;5752;5778;5779;5780;6108;6109;6470;6471;7748;7749;7978;7979;7980;7981;8017;8033;8034;8214;8215;9821;9822;10142;10143;10646;10647;10751;11193;11194;11436;11437;11739;11740	319;502;613;920;921;1476;1477;1703;1704;1760;1761;1849;1850;2865;5198;5199;5465;5490;5491;5492;5493;5809;6151;6152;7374;7375;7597;7598;7599;7600;7601;7632;7646;7647;7828;7829;9325;9326;9622;10106;10107;10214;10642;10643;10891;10892;11174;11175	319;502;613;920;1477;1704;1760;1850;2865;5198;5465;5491;5492;5809;6152;7375;7598;7632;7647;7828;9325;9622;10106;10214;10642;10891;11174	38	959
SPAC10F6.03c|cts1|I|CTP	SPAC10F6.03c|cts1|I|CTP	6	6	6	>SPAC10F6.03c|cts1|I|CTP synthase Cts1 (predicted)	1	6	6	6	5	3	5	3	5	3	13.5	13.5	13.5	66.867	600	600	0	14.999	By MS/MS	By MS/MS	10.5	7.8	64419000	29810000	34609000	24830000	37847000	4	3	7				52	1703;2714;4622;5043;5336;5404	True;True;True;True;True;True	1745;2788;4773;5208;5507;5577	3628;5682;5683;10046;10902;11580;11734;11735	3426;5401;5402;9535;10354;11026;11170	3426;5401;9535;10354;11026;11170
SPAC10F6.06|vip1|I|RNA-binding	SPAC10F6.06|vip1|I|RNA-binding	5	5	5	>SPAC10F6.06|vip1|I|RNA-binding protein Vip1	1	5	5	5	4	4	4	4	4	4	23.7	23.7	23.7	27.459	257	257	0	15.064	By MS/MS	By MS/MS	19.5	18.3	37180000	15061000	22120000	20395000	15672000	3	3	6				53	1557;2232;3877;4144;4348	True;True;True;True;True	1594;2285;4005;4277;4486	3333;4692;4693;8495;8496;9033;9034;9424	3133;4448;8083;8084;8587;8954	3133;4448;8084;8587;8954
SPAC10F6.09c|psm3|I|mitotic	SPAC10F6.09c|psm3|I|mitotic	1	1	1	>SPAC10F6.09c|psm3|I|mitotic cohesin complex subunit Psm3/Smc3	1	1	1	1	0	1	0	1	0	1	1.3	1.3	1.3	136.85	1194	1194	0.0044395	1.2715	By matching	By MS/MS	0	1.3	1934600	0	1934600	0	1837300	0	1	1				54	912	TRUE	941	1913	1813	1813
SPAC10F6.13c|caa1|I|cytoplasmic	SPAC10F6.13c|caa1|I|cytoplasmic	6	6	6	>SPAC10F6.13c|caa1|I|cytoplasmic aspartate aminotransferase Caa1 (predicted)	1	6	6	6	4	5	4	5	4	5	18.6	18.6	18.6	46.14	409	409	0	17.807	By MS/MS	By MS/MS	13	14.2	38948000	18345000	20603000	17028000	20884000	4	4	8				55	1;573;757;1048;3947;4910	True;True;True;True;True;True	1;592;782;1079;4079;5072	2;1237;1613;1614;2191;2192;8637;8638;10661	2;1161;1527;1528;2068;2069;8212;10121	2;1161;1527;2068;8212;10121
SPAC10F6.17c|SPAC10F6.17c|I|mitochondrial	SPAC10F6.17c|SPAC10F6.17c|I|mitochondrial	1	1	1	>SPAC10F6.17c|SPAC10F6.17c|I|mitochondrial pyruvate dehydrogenase (lipoamide) phosphatase (predicted)	1	1	1	1	1	1	1	1	1	1	2.5	2.5	2.5	49.74	444	444	0	2.0979	By MS/MS	By matching	2.5	2.5	12529000	6572600	5956600	0	5656900	1	0	1				56	1126	TRUE	1158	2340;2341	2207	2207
SPAC110.04c|pss1|I|heat	SPAC110.04c|pss1|I|heat	30	30	30	>SPAC110.04c|pss1|I|heat shock protein Pss1	1	30	30	30	27	29	27	29	27	29	51.7	51.7	51.7	80.374	720	720	0	118.21	By MS/MS	By MS/MS	48.6	51.7	1068700000	465280000	603460000	471740000	541720000	24	36	60				57	75;178;187;240;262;283;284;294;368;863;1101;1282;1456;1611;2555;2579;3095;3110;3305;3817;3870;3909;4257;4539;4634;4655;4675;5003;5312;5314	True;True;True;True;True;True;True;True;True;True;True;True;True;True;True;True;True;True;True;True;True;True;True;True;True;True;True;True;True;True	82;186;195;249;271;292;293;304;379;892;1133;1317;1492;1649;2624;2649;3175;3190;3414;3944;3998;4037;4393;4685;4785;4806;4828;5166;5482;5484	173;174;473;474;488;489;587;588;633;634;670;671;672;690;691;816;817;1809;1810;2293;2294;2295;2671;2672;2673;2674;3081;3082;3441;3442;5374;5419;5420;6423;6424;6454;7184;7185;8389;8390;8484;8557;8558;8559;8560;9251;9252;9865;9866;10070;10071;10111;10112;10113;10114;10155;10156;10824;10825;10826;10827;11532;11533;11534;11535;11538;11539	167;168;169;438;439;452;453;548;549;550;593;594;630;631;632;633;634;650;651;770;771;1713;2161;2162;2526;2527;2528;2904;3242;3243;5106;5148;5149;6107;6137;6839;6840;7987;8072;8136;8137;8138;8139;8140;8787;8788;9367;9368;9554;9592;9593;9594;9636;9637;10282;10283;10284;10285;10286;10983;10984;10985;10986;10989;10990	167;438;452;548;593;630;632;650;770;1713;2162;2526;2904;3243;5106;5148;6107;6137;6839;7987;8072;8139;8788;9367;9554;9592;9636;10282;10983;10989
SPAC1142.06|get3|I|GET	SPAC1142.06|get3|I|GET	1	1	1	>SPAC1142.06|get3|I|GET complex ATPase subunit Get3 (predicted)	1	1	1	1	1	1	1	1	1	1	3	3	3	36.548	329	329	0	4.2474	By MS/MS	By MS/MS	3	3	9850400	3890100	5960400	0	5660500	1	2	3				58	1288	TRUE	1323	2683;2684	2535;2536;2537	2535
SPAC11E3.01c|swr1|I|SNF2	SPAC11E3.01c|swr1|I|SNF2	1	1	1	>SPAC11E3.01c|swr1|I|SNF2 family ATP-dependent DNA helicase Swr1	1	1	1	1	1	0	1	0	1	0	0.5	0.5	0.5	149.45	1288	1288	0	2.0824	By MS/MS	By matching	0.5	0	6685500	6685500	0	6685500	0	1	0	1				59	2609	TRUE	2679	5464	5194	5194
SPAC11E3.07|vma4|I|V-type	SPAC11E3.07|vma4|I|V-type	3	3	3	>SPAC11E3.07|vma4|I|V-type ATPase V1 subunit E (predicted)	1	3	3	3	2	3	2	3	2	3	13.2	13.2	13.2	25.741	227	227	0	2.47	By MS/MS	By MS/MS	7.5	13.2	54298000	6801500	47497000	0	45107000	2	3	5				60	2832;4105;4819	True;True;True	2907;4238;4978	5906;5907;8962;10480;10481	5622;5623;8526;9938;9939	5623;8526;9938
SPAC11G7.03|idh1|I|isocitrate	SPAC11G7.03|idh1|I|isocitrate	5	5	5	>SPAC11G7.03|idh1|I|isocitrate dehydrogenase (NAD+) subunit 1 Idh1	1	5	5	5	4	5	4	5	4	5	20.8	20.8	20.8	38.758	356	356	0	23.891	By MS/MS	By MS/MS	17.4	20.8	41055000	19340000	21716000	17896000	22067000	3	3	6				61	1029;1083;4413;4573;5408	True;True;True;True;True	1060;1115;4554;4721;5581	2156;2157;2258;2259;9571;9572;9943;11741;11742	2037;2038;2128;9092;9093;9436;11176	2038;2128;9092;9436;11176
SPAC1805.12c|uep1|I|ribosomal-ubiquitin;SPAC11G7.04|ubi1|I|ribosomal-ubiquitin;SPAC6G10.11c|ubi3|I|ribosomal-ubiquitin;SPAC589.10c|ubi5|I|ribosomal-ubiquitin;SPBC337.08c|ubi4|II|ubiquitin	SPAC1805.12c|uep1|I|ribosomal-ubiquitin;SPAC11G7.04|ubi1|I|ribosomal-ubiquitin;SPAC6G10.11c|ubi3|I|ribosomal-ubiquitin;SPAC589.10c|ubi5|I|ribosomal-ubiquitin;SPBC337.08c|ubi4|II|ubiquitin	3;3;3;3;3	3;3;3;3;3	3;3;3;3;3	>SPAC1805.12c|uep1|I|ribosomal-ubiquitin fusion protein Ubi2;>SPAC11G7.04|ubi1|I|ribosomal-ubiquitin fusion protein Ubi1 (predicted);>SPAC6G10.11c|ubi3|I|ribosomal-ubiquitin fusion protein Ubi3 (predicted);>SPAC589.10c|ubi5|I|ribosomal-ubiquitin fusion pro	5	3	3	3	3	3	3	3	3	3	26.6	26.6	26.6	14.595	128	128;128;150;150;382	0	8.2023	By MS/MS	By MS/MS	26.6	26.6	395500000	164030000	231470000	208300000	167110000	3	4	7				62	1067;4459;4506	True;True;True	1098;4602;4651	2227;2228;9688;9689;9690;9794;9795	2099;2100;9196;9197;9198;9301;9302	2099;9196;9302
SPAC11H11.06|arp2|I|ARP2/3	SPAC11H11.06|arp2|I|ARP2/3	2	2	2	>SPAC11H11.06|arp2|I|ARP2/3 actin-organizing complex subunit Arp2	1	2	2	2	2	1	2	1	2	1	5.4	5.4	5.4	44.23	390	390	0	3.7971	By MS/MS	By MS/MS	5.4	3.3	3953200	3953200	0	3953200	0	2	1	3				63	1334;5331	True;True	1370;5502	2773;2774;11570	2619;2620;11016	2620;11016
SPAC12B10.03|bun62|I|WD	SPAC12B10.03|bun62|I|WD	1	1	1	>SPAC12B10.03|bun62|I|WD repeat protein, human WDR20 family, Bun62	1	1	1	1	0	1	0	1	0	1	1.5	1.5	1.5	61.81	543	543	0.004386	1.1786	By matching	By MS/MS	0	1.5	1365500	0	1365500	0	1296800	0	1	1				64	3615	TRUE	3734	7869	7494	7494
SPAC12G12.04|mcp60|I|mitochondrial	SPAC12G12.04|mcp60|I|mitochondrial	21	21	21	>SPAC12G12.04|mcp60|I|mitochondrial heat shock protein Hsp60/Mcp60	1	21	21	21	17	20	17	20	17	20	42.4	42.4	42.4	62.167	582	582	0	82.825	By MS/MS	By MS/MS	36.6	42.4	761090000	364010000	397080000	363550000	377560000	17	19	36				65	37;201;227;411;482;881;1406;1564;1649;1715;1745;2316;2489;2727;3559;3848;4181;4526;4733;4734;5010	True;True;True;True;True;True;True;True;True;True;True;True;True;True;True;True;True;True;True;True;True	38;209;236;423;497;910;1442;1601;1688;1757;1787;2371;2554;2801;3675;3976;4315;4672;4890;4891;5173	73;74;514;515;560;561;897;898;1045;1849;1850;2988;2989;3347;3348;3519;3650;3716;3717;4859;4860;5224;5225;5226;5710;5711;7715;7716;8444;8445;9107;9845;9846;10308;10309;10310;10838;10839	71;72;478;522;842;979;1754;1755;2816;2817;3147;3148;3318;3449;3516;3517;4607;4608;4956;4957;4958;5424;5425;7343;7344;8034;8035;8657;9347;9348;9349;9778;9779;9780;10294;10295	72;478;522;842;979;1755;2816;3147;3318;3449;3516;4608;4957;5424;7343;8035;8657;9347;9779;9780;10294
SPAC12G12.14c|pfs2|I|WD	SPAC12G12.14c|pfs2|I|WD	2	2	2	>SPAC12G12.14c|pfs2|I|WD repeat protein Pfs2	1	2	2	2	1	1	1	1	1	1	5.3	5.3	5.3	57.654	509	509	0	5.1995	By MS/MS	By MS/MS	2.4	2.9	1040400	0	1040400	0	988030	1	1	2				66	1807;3339	True;True	1850;3450	3846;7262	3646;6910	3646;6910
SPAC1327.01c|SPAC1327.01c|I|transcription	SPAC1327.01c|SPAC1327.01c|I|transcription	1	1	1	>SPAC1327.01c|SPAC1327.01c|I|transcription factor, zf-fungal binuclear cluster type (predicted)	1	1	1	1	1	1	1	1	1	1	1.2	1.2	1.2	107.81	977	977	0	9.6108	By MS/MS	By MS/MS	1.2	1.2	11564000	5547100	6017100	0	5714400	1	0	1				67	3547	TRUE	3663	7691;7692	7320;7321	7321
SPAC13A11.02c|erg11|I|sterol	SPAC13A11.02c|erg11|I|sterol	10	10	10	>SPAC13A11.02c|erg11|I|sterol 14-demethylase Erg11 (predicted)	1	10	10	10	7	9	7	9	7	9	27.1	27.1	27.1	56.331	495	495	0	31.622	By MS/MS	By MS/MS	21.4	23	99042000	42272000	56770000	47859000	48326000	7	12	19				68	722;906;1413;2514;3985;4322;4522;4930;5159;5259	True;True;True;True;True;True;True;True;True;True	746;935;1449;2580;4118;4459;4668;5093;5326;5428	1538;1539;1900;1901;3002;5274;8712;8713;9376;9377;9378;9379;9834;9835;10697;10698;11127;11422	1453;1454;1800;1801;2828;5005;8282;8283;8907;8908;8909;8910;8911;8912;9337;10156;10157;10578;10879	1454;1801;2828;5005;8282;8909;9337;10157;10578;10879
SPAC13F5.06c|sec10|I|exocyst	SPAC13F5.06c|sec10|I|exocyst	7	7	7	>SPAC13F5.06c|sec10|I|exocyst complex subunit Sec10	1	7	7	7	6	5	6	5	6	5	10.6	10.6	10.6	92.515	811	811	0	11.192	By MS/MS	By MS/MS	8.8	7.9	48852000	30216000	18636000	32381000	15533000	4	5	9				69	995;1348;2248;2719;3986;4505;4765	True;True;True;True;True;True;True	1026;1384;2302;2793;4119;4650;4922	2078;2079;2801;2802;4724;5691;5692;8714;8715;9793;10370;10371	1962;2645;2646;4482;5409;8284;8285;9300;9837;9838	1962;2645;4482;5409;8284;9300;9837
SPAC13G6.02c|rps101|I|40S	SPAC13G6.02c|rps101|I|40S	5	3	3	>SPAC13G6.02c|rps101|I|40S ribosomal protein S3a	1	5	3	3	5	4	3	2	3	2	23.4	17.1	17.1	28.488	252	252	0	10.157	By MS/MS	By MS/MS	23.4	16.3	43977000	28635000	15342000	20647000	22558000	2	2	4				70	353;441;2137;2777;4846	False;True;True;False;True	364;454;2186;2851;5007	790;791;956;957;4498;5805;5806;10540;10541	747;748;896;4266;5519;5520;9998;9999	747;896;4266;5520;9999
SPAC13G6.03|gpi7|I|GPI	SPAC13G6.03|gpi7|I|GPI	1	1	1	>SPAC13G6.03|gpi7|I|GPI anchor biosynthesis protein Gpi7 (predicted)	1	1	1	1	1	0	1	0	1	0	1.3	1.3	1.3	85.645	758	758	0.0033746	1.3863	By MS/MS	By matching	1.3	0	0	0	0	0	0	1	0	1				71	2826	TRUE	2900	5898	5614	5614
SPAC13G6.04|tim8|I|TIM22	SPAC13G6.04|tim8|I|TIM22	1	1	1	>SPAC13G6.04|tim8|I|TIM22 inner membrane protein import complex subunit Tim8 (predicted)	1	1	1	1	1	1	1	1	1	1	18.4	18.4	18.4	9.9873	87	87	0	3.9654	By matching	By MS/MS	18.4	18.4	10485000	5589500	4895400	0	4649000	0	1	1				72	3484	TRUE	3597	7555;7556	7191	7191
SPAC13G6.06c|gcv2|I|glycine	SPAC13G6.06c|gcv2|I|glycine	18	18	18	>SPAC13G6.06c|gcv2|I|glycine cleavage complex subunit P (predicted)	1	18	18	18	14	16	14	16	14	16	21.5	21.5	21.5	114.23	1031	1031	0	65.758	By MS/MS	By MS/MS	16.2	19.2	463480000	197590000	265890000	196340000	246150000	16	18	34				73	16;138;488;707;729;1314;1837;2019;2371;3265;3401;3466;3882;4162;4378;4546;4600;5281	True;True;True;True;True;True;True;True;True;True;True;True;True;True;True;True;True;True	16;17;146;503;729;753;1349;1880;2064;2427;3364;3512;3578;4010;4295;4516;4692;4751;5451	27;28;29;400;401;1054;1055;1502;1551;1552;1553;1554;2733;2734;3905;3906;4256;4257;4969;6883;6884;7390;7391;7520;7521;8503;9067;9482;9883;9884;9999;10000;10001;11468;11469	27;28;368;369;987;988;1420;1465;1466;1467;1468;2581;2582;3702;3703;4035;4036;4718;6534;6535;7027;7028;7153;7154;8091;8617;9010;9382;9383;9488;9489;9490;10924;10925	28;369;987;1420;1468;2581;3703;4035;4718;6535;7027;7154;8091;8617;9010;9382;9489;10924	39;40	107;866
SPAC13G6.07c|rps601|I|40S;SPAPB1E7.12|rps602|I|40S	SPAC13G6.07c|rps601|I|40S;SPAPB1E7.12|rps602|I|40S	5;4	5;4	5;4	>SPAC13G6.07c|rps601|I|40S ribosomal protein S6;>SPAPB1E7.12|rps602|I|40S ribosomal protein S6	2	5	5	5	3	5	3	5	3	5	27.2	27.2	27.2	27.499	239	239;239	0	18.348	By MS/MS	By MS/MS	15.5	27.2	48891000	17560000	31331000	19382000	27933000	2	5	7				74	1204;1459;2749;3507;3670	True;True;True;True;True	1237;1495;2823;3622;3790	2492;3088;5753;5754;7610;7611;7972;7973	2357;2910;5466;5467;7246;7592;7593	2357;2910;5466;7246;7593
SPAC13G6.11c|erg12|I|mevalonate	SPAC13G6.11c|erg12|I|mevalonate	2	2	2	>SPAC13G6.11c|erg12|I|mevalonate kinase Erg12 (predicted)	1	2	2	2	2	2	2	2	2	2	6.7	6.7	6.7	43.406	404	404	0	3.9842	By MS/MS	By MS/MS	6.7	6.7	8062900	3879600	4183300	3875800	3976600	2	1	3				75	2692;2989	True;True	2766;3068	5631;5632;6216;6217;6218	5354;5912;5913	5354;5913
SPAC13G7.02c|ssa1|I|heat	SPAC13G7.02c|ssa1|I|heat	20	2	2	>SPAC13G7.02c|ssa1|I|heat shock protein Ssa1 (predicted)	1	20	2	2	19	20	1	2	1	2	30.9	1.7	1.7	70.142	644	644	0	7.5626	By MS/MS	By MS/MS	30.9	30.9	3585900	0	3585900	0	3405500	1	2	3				76	394;421;544;1186;1193;2111;2301;3162;3163;3171;3172;3371;3502;3503;3516;4020;4021;4605;4740;5031	False;False;False;False;False;False;False;True;True;False;False;False;False;False;False;False;False;False;False;False	406;434;560;1218;1225;2158;2356;3242;3243;3251;3252;3482;3616;3617;3618;3631;4153;4154;4756;4897;5196	860;861;917;918;919;920;1176;1177;1178;2454;2455;2473;2474;4431;4432;4433;4434;4435;4436;4833;4834;6562;6563;6564;6589;6590;6591;6592;6593;6594;7325;7326;7327;7328;7329;7330;7331;7332;7593;7594;7595;7596;7597;7598;7599;7600;7601;7602;7628;7629;7630;7631;8785;8786;8787;8788;8789;8790;8791;10012;10013;10014;10320;10321;10881;10882;10883;10884	811;812;859;860;861;862;1104;1105;1106;1107;2319;2320;2336;2337;2338;2339;2340;4209;4210;4211;4212;4213;4585;6239;6240;6241;6264;6265;6266;6267;6268;6269;6270;6967;6968;6969;6970;6971;7228;7229;7230;7231;7232;7233;7234;7235;7236;7237;7238;7262;7263;7264;7265;8350;8351;8352;8353;8354;8355;9501;9502;9503;9788;9789;10334;10335;10336;10337	811;860;1104;2320;2340;4209;4585;6239;6241;6264;6269;6967;7229;7235;7262;8353;8354;9502;9789;10335	41	59
SPAC13G7.06|met16|I|phosphoadenosine	SPAC13G7.06|met16|I|phosphoadenosine	2	2	2	>SPAC13G7.06|met16|I|phosphoadenosine phosphosulfate reductase	1	2	2	2	1	2	1	2	1	2	10.5	10.5	10.5	30.56	266	266	0	5.4046	By MS/MS	By MS/MS	5.3	10.5	4913900	2790100	2123800	0	2017000	1	2	3				77	501;3190	True;True	516;3270	1082;1083;6629	1010;1011;6302	1011;6302
SPAC140.01|sdh2|I|succinate	SPAC140.01|sdh2|I|succinate	2	2	2	>SPAC140.01|sdh2|I|succinate dehydrogenase (ubiquinone) iron-sulfur protein subunit (predicted)	1	2	2	2	2	1	2	1	2	1	8	8	8	31.425	275	275	0	4.2218	By MS/MS	By MS/MS	8	3.6	20498000	15828000	4669500	15828000	0	1	1	2				78	1603;2125	True;True	1641;2173	3428;3429;4466	3230;4237	3230;4237
SPAC1420.02c|cct5|I|chaperonin-containing	SPAC1420.02c|cct5|I|chaperonin-containing	5	5	5	>SPAC1420.02c|cct5|I|chaperonin-containing T-complex epsilon subunit Cct5	1	5	5	5	5	4	5	4	5	4	15.4	15.4	15.4	59.377	546	546	0	40.38	By MS/MS	By MS/MS	15.4	12.5	41244000	26555000	14688000	20936000	19569000	4	4	8				79	1184;1838;2902;3667;4176	True;True;True;True;True	1216;1881;2978;3787;4309	2451;3907;3908;6045;6046;7966;7967;9099;9100	2316;3704;3705;5748;5749;7586;7587;8647;8648	2316;3705;5748;7586;8647
SPAPB8E5.02c|rpn502|I|19S;SPAC1420.03|rpn501|I|19S	SPAPB8E5.02c|rpn502|I|19S;SPAC1420.03|rpn501|I|19S	11;11	11;11	11;11	>SPAPB8E5.02c|rpn502|I|19S proteasome regulatory subunit Rpn502;>SPAC1420.03|rpn501|I|19S proteasome regulatory subunit Rpn501	2	11	11	11	10	10	10	10	10	10	35.7	35.7	35.7	51.618	443	443;443	0	28.97	By MS/MS	By MS/MS	31.8	32.7	217260000	97518000	119750000	97774000	113470000	9	10	19				80	137;1931;1997;2066;2200;2949;3111;3766;3889;4187;4662	True;True;True;True;True;True;True;True;True;True;True	145;1975;2042;2111;2252;3028;3191;3890;4017;4322;4814	399;4088;4089;4215;4216;4341;4621;4622;6146;6147;6455;6456;6457;8196;8197;8515;8516;8517;8518;9119;9120;10128;10129	367;3877;3878;3998;3999;4121;4382;4383;5845;5846;6138;6139;6140;7814;8102;8103;8668;9608;9609	367;3878;3999;4121;4383;5846;6139;7814;8102;8668;9608
SPAC144.03|ade2|I|adenylosuccinate	SPAC144.03|ade2|I|adenylosuccinate	4	4	4	>SPAC144.03|ade2|I|adenylosuccinate synthetase Ade2	1	4	4	4	3	4	3	4	3	4	13.6	13.6	13.6	47.876	434	434	0	9.0327	By MS/MS	By MS/MS	11.1	13.6	67307000	24934000	42373000	25575000	39600000	3	2	5				81	43;2596;3129;4778	True;True;True;True	44;2666;3209;4935	84;85;5444;6495;6496;10395;10396	82;83;5173;6176;9857	82;5173;6176;9857
SPAC144.09c|sfc2|I|RNA	SPAC144.09c|sfc2|I|RNA	2	2	2	>SPAC144.09c|sfc2|I|RNA polymerase III transcription factor TFIIIA	1	2	2	2	0	2	0	2	0	2	5.9	5.9	5.9	43.85	374	374	0.0011338	1.4209	By matching	By MS/MS	0	5.9	740620	0	740620	0	703360	0	2	2				82	1811;5168	True;True	1854;5335	3855;11141	3655;10593	3655;10593
SPAC31G5.03|rps1101|I|40S;SPAC144.11|rps1102|I|40S	SPAC31G5.03|rps1101|I|40S;SPAC144.11|rps1102|I|40S	8;8	8;8	8;8	>SPAC31G5.03|rps1101|I|40S ribosomal protein S11 (predicted);>SPAC144.11|rps1102|I|40S ribosomal protein S11 (predicted)	2	8	8	8	8	6	8	6	8	6	48	48	48	17.5	152	152;152	0	24.866	By MS/MS	By MS/MS	48	46.1	392400000	204960000	187440000	176270000	206700000	8	8	16				83	426;522;1836;2193;3412;3746;4542;4543	True;True;True;True;True;True;True;True	439;537;1879;2244;3523;3870;4688;4689	927;928;1118;1119;3904;4603;4604;7416;7417;8153;8154;9876;9877;9878	869;870;1047;1048;1049;3701;4362;4363;7051;7052;7769;7770;7771;7772;9376;9377	870;1047;3701;4362;7052;7772;9376;9377
SPAC1486.01|sod2|I|mitochondrial	SPAC1486.01|sod2|I|mitochondrial	2	2	2	>SPAC1486.01|sod2|I|mitochondrial superoxide dismutase Sod2	1	2	2	2	2	2	2	2	2	2	8.3	8.3	8.3	24.346	218	218	0	10.22	By MS/MS	By MS/MS	8.3	8.3	36618000	18933000	17685000	19051000	16677000	2	2	4				84	235;5138	True;True	244;5305	579;580;11091;11092	540;541;10541;10542	540;10541
SPAC1486.04c|alm1|I|medial	SPAC1486.04c|alm1|I|medial	2	2	2	>SPAC1486.04c|alm1|I|medial ring protein Alm1	1	2	2	2	2	1	2	1	2	1	1.4	1.4	1.4	197.86	1727	1727	0.0044053	1.2051	By MS/MS	By matching	1.4	1	2702700	1757800	944910	1757800	0	1	0	1				85	3642;4211	True;True	3761;4346	7919;9161;9162	7541;8710	7541;8710
SPAC14C4.11|vtc2|I|polyphosphate	SPAC14C4.11|vtc2|I|polyphosphate	11	11	11	>SPAC14C4.11|vtc2|I|polyphosphate synthetase, VTC complex subunit Vtc2/3 (predicted)	1	11	11	11	10	10	10	10	10	10	20.4	20.4	20.4	85.444	734	734	0	39.2	By MS/MS	By MS/MS	17.8	18.1	91842000	52286000	39556000	49091000	40760000	6	8	14				86	605;853;1772;2747;2941;3212;3326;3513;3675;3743;5105	True;True;True;True;True;True;True;True;True;True;True	624;882;1815;2821;3019;3292;3435;3628;3796;3867;5271	1309;1310;1793;3776;3777;5751;6124;6125;6668;6669;7222;7223;7623;7624;7984;7985;8147;8148;11022;11023	1235;1697;3576;5464;5825;5826;6339;6873;6874;7258;7603;7762;10470;10471	1235;1697;3576;5464;5826;6339;6874;7258;7603;7762;10471
SPAC14C4.14|atp1|I|F1-ATPase	SPAC14C4.14|atp1|I|F1-ATPase	11	11	11	>SPAC14C4.14|atp1|I|F1-ATPase alpha subunit	1	11	11	11	10	9	10	9	10	9	21.5	21.5	21.5	58.587	536	536	0	31.154	By MS/MS	By MS/MS	19.6	17.7	208200000	116370000	91827000	91679000	111900000	10	9	19				87	25;186;973;1565;1798;1828;2667;4342;4909;5066;5067	True;True;True;True;True;True;True;True;True;True;True	26;194;1003;1602;1841;1871;2739;4480;5071;5231;5232	50;51;486;487;2041;2042;3349;3350;3823;3824;3887;3888;3889;3890;5585;9417;10660;10939;10940;10941;10942	48;49;450;451;1928;1929;3149;3624;3625;3685;3686;3687;5312;8947;10120;10389;10390;10391;10392	48;450;1928;3149;3624;3685;5312;8947;10120;10389;10392
SPAC1556.02c|sdh1|I|succinate	SPAC1556.02c|sdh1|I|succinate	5	5	5	>SPAC1556.02c|sdh1|I|succinate dehydrogenase Sdh1 (predicted)	1	5	5	5	4	4	4	4	4	4	9.4	9.4	9.4	70.465	641	641	0	14.558	By MS/MS	By MS/MS	8.1	8.1	72566000	36513000	36052000	35693000	35059000	4	5	9				88	471;1384;1891;4420;5142	True;True;True;True;True	485;1420;1934;4561;5309	1018;1019;2951;2952;4015;9590;9591;11099	955;956;957;2778;2779;3805;9107;9108;10549	956;2778;3805;9108;10549
SPAC1556.08c|cbs2|I|AMP-activated	SPAC1556.08c|cbs2|I|AMP-activated	3	3	3	>SPAC1556.08c|cbs2|I|AMP-activated protein kinase gamma subunit cbs2	1	3	3	3	3	1	3	1	3	1	9.3	9.3	9.3	37.427	334	334	0	1.6241	By MS/MS	By matching	9.3	2.1	10761000	6025700	4735100	0	4496900	3	0	3				89	425;935;4588	True;True;True	438;964;4737	926;1959;1960;9970	868;1855;9462	868;1855;9462
SPAC1565.04c|ste4|I|adaptor	SPAC1565.04c|ste4|I|adaptor	1	1	1	>SPAC1565.04c|ste4|I|adaptor protein Ste4	1	1	1	1	1	0	1	0	1	0	4.2	4.2	4.2	30.735	264	264	0.0065217	1.1315	By MS/MS	By matching	4.2	0	0	0	0	0	0	1	0	1				90	818	TRUE	847	1730	1639	1639
SPAC1565.08|cdc48|I|AAA	SPAC1565.08|cdc48|I|AAA	10	10	10	>SPAC1565.08|cdc48|I|AAA family ATPase involved in ubiquitin-mediated protein degradation Cdc48	1	10	10	10	8	8	8	8	8	8	14.8	14.8	14.8	90.124	815	815	0	25.493	By MS/MS	By MS/MS	12.4	12.1	100880000	51145000	49738000	53402000	44980000	8	7	15				91	181;1005;1153;1355;1711;2409;2615;2689;3518;5128	True;True;True;True;True;True;True;True;True;True	189;1036;1185;1391;1753;2467;2685;2763;3633;5295	478;479;2105;2388;2389;2813;2814;3643;5047;5474;5475;5626;7634;7635;11068;11069	443;444;1992;2255;2256;2658;2659;3442;4791;5204;5349;7267;7268;10516;10517	443;1992;2256;2658;3442;4791;5204;5349;7267;10517
SPAC15A10.02|taf12|I|transcription	SPAC15A10.02|taf12|I|transcription	1	1	1	>SPAC15A10.02|taf12|I|transcription factor TFIID complex subunit A/ SAGA complex subunit Taf12	1	1	1	1	1	1	1	1	1	1	2.4	2.4	2.4	49.195	450	450	0	3.285	By matching	By MS/MS	2.4	2.4	15883000	6886700	8995800	0	8543200	0	1	1				92	2972	TRUE	3051	6184;6185	5881	5881
SPAC15A10.11|ubr11|I|UBR	SPAC15A10.11|ubr11|I|UBR	2	2	2	>SPAC15A10.11|ubr11|I|UBR ubiquitin-protein ligase E3 Ubr11	1	2	2	2	2	0	2	0	2	0	1	1	1	234.04	2052	2052	0	4.0706	By MS/MS	By matching	1	0	3845300	3845300	0	3845300	0	2	0	2				93	4036;5414	True;True	4169;5587	8818;11751	8381;11185	8381;11185
SPAC15F9.02|seh1|I|Seh1-associated	SPAC15F9.02|seh1|I|Seh1-associated	2	2	2	>SPAC15F9.02|seh1|I|Seh1-associated complex subunit Seh1	1	2	2	2	2	1	2	1	2	1	9.1	9.1	9.1	38.564	339	339	0	4.4583	By MS/MS	By MS/MS	9.1	3.5	10342000	6540600	3801300	6540600	0	1	1	2				94	4657;4693	True;True	4809;4846	10119;10120;10227	9600;9703	9600;9703
SPAC1635.01|SPAC1635.01|I|mitochondrial	SPAC1635.01|SPAC1635.01|I|mitochondrial	8	8	8	>SPAC1635.01|SPAC1635.01|I|mitochondrial outer membrane voltage-dependent anion-selective channel (predicted)	1	8	8	8	7	8	7	8	7	8	49.6	49.6	49.6	29.653	282	282	0	36.953	By MS/MS	By MS/MS	41.1	49.6	322220000	133520000	188700000	135340000	177380000	9	9	18				95	343;367;590;1631;2569;4346;4791;5194	True;True;True;True;True;True;True;True	354;378;609;1670;2639;4484;4949;5362	771;772;814;815;1272;1273;3484;3485;5399;5400;9421;10419;10420;11185;11186;11187;11188	728;729;768;769;1198;1199;3285;3286;5129;5130;8951;9877;9878;10633;10634;10635;10636;10637	729;769;1199;3286;5130;8951;9877;10637
SPAC1687.06c|rpl44|I|60S	SPAC1687.06c|rpl44|I|60S	1	1	1	>SPAC1687.06c|rpl44|I|60S ribosomal protein L28/L44 (predicted)	1	1	1	1	1	1	1	1	1	1	9	9	9	14.755	134	134	0	84.223	By MS/MS	By MS/MS	9	9	23382000	12291000	11091000	0	10533000	1	2	3				96	4296	TRUE	4433	9320;9321	8851;8852;8853	8852
SPAC1687.15|gsk3|I|serine/threonine	SPAC1687.15|gsk3|I|serine/threonine	3	3	3	>SPAC1687.15|gsk3|I|serine/threonine protein kinase Gsk3	1	3	3	3	3	3	3	3	3	3	8.3	8.3	8.3	44.165	387	387	0	4.076	By MS/MS	By MS/MS	8.3	8.3	38861000	21055000	17807000	20746000	17219000	3	3	6				97	556;2219;3207	True;True;True	572;2271;3287	1196;1197;4661;4662;6660;6661	1124;1125;4418;4419;6331;6332	1125;4419;6331
SPAC1687.16c|erg31|I|C-5	SPAC1687.16c|erg31|I|C-5	1	1	1	>SPAC1687.16c|erg31|I|C-5 sterol desaturase Erg31	1	1	1	1	0	1	0	1	0	1	4	4	4	35.625	300	300	0	2.3555	By matching	By MS/MS	0	4	3246500	0	3246500	0	3083100	0	1	1				98	354	TRUE	365	792	749	749
SPAC16C9.03|nmd3|I|export	SPAC16C9.03|nmd3|I|export	1	1	1	>SPAC16C9.03|nmd3|I|export adaptor Nmd3 (predicted)	1	1	1	1	1	1	1	1	1	1	2.8	2.8	2.8	56.55	498	498	0	2.5622	By MS/MS	By matching	2.8	2.8	5299700	2393500	2906300	0	2760100	1	0	1				99	3127	TRUE	3207	6489;6490	6171	6171
SPAC16C9.06c|upf1|I|ATP-dependent	SPAC16C9.06c|upf1|I|ATP-dependent	2	2	2	>SPAC16C9.06c|upf1|I|ATP-dependent RNA helicase Upf1	1	2	2	2	2	0	2	0	2	0	2.3	2.3	2.3	104.53	925	925	0.0011481	1.5101	By MS/MS	By matching	2.3	0	3044100	3044100	0	3044100	0	2	0	2				100	377;5275	True;True	388;5445	831;11455	785;10910	785;10910
SPAC16E8.01|shd1|I|cytoskeletal	SPAC16E8.01|shd1|I|cytoskeletal	7	7	7	>SPAC16E8.01|shd1|I|cytoskeletal protein binding protein Sla1 family, Shd1 (predicted)	1	7	7	7	6	7	6	7	6	7	6.9	6.9	6.9	154.63	1420	1420	0	9.3661	By MS/MS	By MS/MS	6.1	6.9	81365000	43524000	37841000	40564000	38897000	7	7	14				101	907;1469;2292;3568;4050;4350;4422	True;True;True;True;True;True;True	936;1505;2347;3685;4183;4488;4563	1902;1903;3107;3108;4817;4818;7750;7751;8848;8849;9427;9594;9595	1802;1803;1804;2927;2928;2929;4570;4571;7376;8411;8412;8957;9111;9112	1804;2928;4570;7376;8412;8957;9112
SPAC16E8.07c|vph1|I|V-type	SPAC16E8.07c|vph1|I|V-type	1	1	1	>SPAC16E8.07c|vph1|I|V-type ATPase V0 subunit a (predicted)	1	1	1	1	1	1	1	1	1	1	1.3	1.3	1.3	94.158	831	831	0	4.1782	By MS/MS	By MS/MS	1.3	1.3	13242000	6038200	7203400	0	6841000	1	0	1				102	699	TRUE	721	1488;1489	1407;1408	1408
SPAC1751.03|tif313|I|translation	SPAC1751.03|tif313|I|translation	6	6	6	>SPAC1751.03|tif313|I|translation initiation factor eIF3m	1	6	6	6	5	5	5	5	5	5	14.4	14.4	14.4	45.085	402	402	0	16.457	By MS/MS	By MS/MS	10.7	12.4	26664000	8317800	18347000	11229000	14513000	5	4	9				103	121;1110;1780;1978;2976;5251	True;True;True;True;True;True	128;1142;1823;2023;3055;5420	372;2310;2311;3790;3791;4182;6193;6194;11406;11407	344;2176;2177;3589;3590;3966;5888;5889;10865	344;2177;3589;3966;5889;10865
SPAC1782.11|met14|I|adenylyl-sulfate	SPAC1782.11|met14|I|adenylyl-sulfate	2	2	2	>SPAC1782.11|met14|I|adenylyl-sulfate kinase (predicted)	1	2	2	2	1	2	1	2	1	2	15.8	15.8	15.8	22.669	202	202	0	2.3051	By matching	By MS/MS	9.4	15.8	23531000	4753500	18778000	0	17833000	0	2	2				104	440;1225	True;True	453;1258	955;2533;2534	895;2396	895;2396
SPAC1783.07c|pap1|I|transcription	SPAC1783.07c|pap1|I|transcription	2	2	2	>SPAC1783.07c|pap1|I|transcription factor Pap1/Caf3	1	2	2	2	2	0	2	0	2	0	4.3	4.3	4.3	61.531	552	552	0.0011403	1.4651	By MS/MS	By matching	4.3	0	12016000	12016000	0	12016000	0	2	0	2				105	265;969	True;True	274;999	640;2033	601;1918	601;1918
SPAC1783.08c|rpl1502|I|60S	SPAC1783.08c|rpl1502|I|60S	6	1	1	>SPAC1783.08c|rpl1502|I|60S ribosomal protein L15b (predicted)	1	6	1	1	5	6	1	1	1	1	30.8	6	6	23.822	201	201	0	2.4612	By MS/MS	By MS/MS	22.9	30.8	7828300	7828300	0	7828300	0	2	2	4				106	1652;1864;2207;3759;5318;5355	False;False;False;False;False;True	1692;1907;2259;3883;5488;5527	3525;3964;3965;4635;4636;4637;4638;8181;8182;11547;11548;11615;11616;11617	3323;3756;3757;4396;4397;4398;4399;7800;7801;10998;11057;11058;11059;11060	3323;3757;4396;7801;10998;11059
SPAC17A2.01|bsu1|I|high-affinity	SPAC17A2.01|bsu1|I|high-affinity	3	3	3	>SPAC17A2.01|bsu1|I|high-affinity import carrier for pyridoxine, pyridoxal, and pyridoxamine Bsu1	1	3	3	3	3	2	3	2	3	2	5.3	5.3	5.3	58.484	526	526	0	3.8618	By MS/MS	By MS/MS	5.3	4	25552000	4331700	21221000	0	20153000	3	2	5				107	1423;1955;2321	True;True;True	1459;1999;2376	3017;3018;4134;4135;4869	2842;2843;3921;3922;4618	2843;3921;4618
SPAC17A2.12|rrp1|I|ATP-dependent	SPAC17A2.12|rrp1|I|ATP-dependent	1	1	1	>SPAC17A2.12|rrp1|I|ATP-dependent DNA helicase/ ubiquitin-protein ligase E3 (predicted)	1	1	1	1	1	1	1	1	1	1	1.3	1.3	1.3	101.38	897	897	0	1.7857	By MS/MS	By MS/MS	1.3	1.3	2449000	1125900	1323100	0	1256600	1	1	2				108	4946	TRUE	5109	10720;10721	10181;10182	10181
SPAC17A2.13c|rad25|I|14-3-3	SPAC17A2.13c|rad25|I|14-3-3	7	7	6	>SPAC17A2.13c|rad25|I|14-3-3 protein Rad25	1	7	7	6	5	6	5	6	4	5	39.3	39.3	39.3	30.369	270	270	0	59.397	By MS/MS	By MS/MS	25.9	33	58780000	26339000	32441000	28498000	26262000	4	7	11				109	29;728;754;1843;2116;2422;3792	True;True;True;True;True;True;True	30;752;778;779;1886;2163;2480;3917	58;1550;1607;1608;1609;3916;3917;4445;4446;5067;8326;8327	58;1464;1520;1521;1522;3714;4219;4220;4810;4811;7932;7933	58;1464;1521;3714;4219;4810;7932	42	222
SPAPB8E5.06c|rpl302|I|60S;SPAC17A5.03|rpl301|I|60S	SPAPB8E5.06c|rpl302|I|60S;SPAC17A5.03|rpl301|I|60S	8;8	8;8	8;8	>SPAPB8E5.06c|rpl302|I|60S ribosomal protein L3;>SPAC17A5.03|rpl301|I|60S ribosomal protein L3	2	8	8	8	8	6	8	6	8	6	19.3	19.3	19.3	43.816	388	388;388	0	17.963	By MS/MS	By MS/MS	19.3	12.9	61801000	46542000	15258000	27297000	33736000	7	5	12				110	1802;2384;3660;4093;4117;4118;4648;4868	True;True;True;True;True;True;True;True	1845;2440;3779;4226;4250;4251;4799;5029	3832;3833;4995;4996;7951;8936;8937;8983;8984;8985;8986;8987;8988;10099;10583;10584	3633;3634;4744;4745;7571;8499;8500;8543;8544;8545;9583;10043;10044	3633;4744;7571;8499;8543;8544;9583;10044
SPAC17A5.14|exo2|I|exonuclease	SPAC17A5.14|exo2|I|exonuclease	9	9	9	>SPAC17A5.14|exo2|I|exonuclease II Exo2	1	9	9	9	8	7	8	7	8	7	7.5	7.5	7.5	152.59	1328	1328	0	16.204	By MS/MS	By MS/MS	6.9	5.9	62976000	27096000	35880000	31007000	30164000	9	6	15				111	113;1020;1560;2049;2312;2861;4784;5018;5198	True;True;True;True;True;True;True;True;True	120;1051;1597;2094;2367;2936;4941;5183;5366	358;359;2139;3337;3338;4310;4311;4853;5967;5968;10406;10407;10854;10855;11195	332;333;2024;3137;3138;4089;4090;4091;4602;5673;5674;9866;10307;10308;10644	332;2024;3138;4090;4602;5673;9866;10308;10644
SPAC17A5.15c|gus1|I|cytoplasmic	SPAC17A5.15c|gus1|I|cytoplasmic	4	4	4	>SPAC17A5.15c|gus1|I|cytoplasmic glutamate-tRNA ligase gus1 (predicted)	1	4	4	4	4	4	4	4	4	4	6.8	6.8	6.8	80.749	716	716	0	8.2151	By MS/MS	By MS/MS	6.8	6.8	48327000	23322000	25005000	23888000	23181000	4	1	5				112	17;2539;4207;4431	True;True;True;True	18;2607;4342;4573	30;31;5340;5341;9154;9155;9612;9613	29;5073;5074;8703;9125	29;5073;8703;9125
SPAC17C9.03|tif471|I|translation	SPAC17C9.03|tif471|I|translation	3	3	3	>SPAC17C9.03|tif471|I|translation initiation factor eIF4G	1	3	3	3	2	3	2	3	2	3	3.5	3.5	3.5	154.03	1403	1403	0	6.1364	By MS/MS	By MS/MS	1.9	3.5	30478000	13472000	17006000	13472000	0	2	2	4				113	693;2346;4260	True;True;True	715;2402;4396	1479;1480;4921;4922;9256	1398;1399;4671;8792	1398;4671;8792
SPAC17C9.09c|tim13|I|TIM22	SPAC17C9.09c|tim13|I|TIM22	4	4	4	>SPAC17C9.09c|tim13|I|TIM22 inner membrane protein import complex subunit Tim13 (predicted)	1	4	4	4	4	4	4	4	4	4	57.9	57.9	57.9	10.742	95	95	0	10.765	By MS/MS	By MS/MS	57.9	57.9	85478000	35745000	49733000	38179000	44797000	4	4	8				114	518;1548;3648;5346	True;True;True;True	533;1585;3767;5517;5518	1110;1111;3317;3318;7929;7930;11599;11600;11601	1038;1039;3119;3120;7551;7552;11044;11045	1038;3120;7552;11044	43	73
SPAC17D4.01|pex7|I|peroxin-7	SPAC17D4.01|pex7|I|peroxin-7	3	3	3	>SPAC17D4.01|pex7|I|peroxin-7 (predicted)	1	3	3	3	3	3	3	3	3	3	14.6	14.6	14.6	34.588	308	308	0	14.697	By MS/MS	By MS/MS	14.6	14.6	39318000	18934000	20384000	18390000	19903000	2	2	4				115	1960;2479;4224	True;True;True	2004;2543;4359	4143;4144;5206;5207;9185;9186	3930;4938;4939;8727;8728	3930;4939;8727
SPAC17D4.03c|cis4|I|cation	SPAC17D4.03c|cis4|I|cation	1	1	1	>SPAC17D4.03c|cis4|I|cation diffusion family zinc transmembrane transporter Cis4	1	1	1	1	1	1	1	1	1	1	1.2	1.2	1.2	82.739	732	732	0	3.1092	By MS/MS	By MS/MS	1.2	1.2	1835800	0	1835800	0	1743400	1	1	2				116	694	TRUE	716	1481;1482	1400;1401	1401
SPAC17G6.08|pep7|I|prevacuole/endosomal	SPAC17G6.08|pep7|I|prevacuole/endosomal	1	1	1	>SPAC17G6.08|pep7|I|prevacuole/endosomal FYVE tethering component Pep7 (predicted)	1	1	1	1	1	1	1	1	1	1	1.7	1.7	1.7	62.434	536	536	0	3.065	By MS/MS	By matching	1.7	1.7	3243100	1364700	1878400	0	1783900	2	0	2				117	1816	TRUE	1859	3863;3864	3663;3664	3664
SPAC17G6.10|ssr1|I|SWI/SNF	SPAC17G6.10|ssr1|I|SWI/SNF	3	3	3	>SPAC17G6.10|ssr1|I|SWI/SNF and RSC complex subunit Ssr1	1	3	3	3	3	2	3	2	3	2	7.8	7.8	7.8	59.638	527	527	0	3.045	By MS/MS	By MS/MS	7.8	5.7	23986000	18929000	5057100	14440000	9291700	2	1	3				118	483;2070;4530	True;True;True	498;2115;4676	1046;4348;4349;9853;9854	980;4127;9355	980;4127;9355
SPAC17G6.13|slt1|I|Schizosaccharomyces	SPAC17G6.13|slt1|I|Schizosaccharomyces	8	8	8	>SPAC17G6.13|slt1|I|Schizosaccharomyces specific protein Slt1	1	8	8	8	8	8	8	8	8	8	30.9	30.9	30.9	49.136	433	433	0	66.614	By MS/MS	By MS/MS	30.9	30.9	578320000	284050000	294270000	253220000	310300000	13	12	25				119	190;438;1446;1866;3002;3652;3749;4391	True;True;True;True;True;True;True;True	198;451;1482;1909;3081;3771;3873;4530	493;494;495;496;951;952;3057;3058;3059;3060;3967;3968;6237;6238;6239;6240;7938;7939;8161;8162;9511;9512;9513	457;458;459;460;461;891;892;2881;2882;2883;2884;3759;3760;5928;5929;5930;5931;7559;7777;7778;7779;7780;9039;9040;9041	458;892;2883;3759;5929;7559;7778;9041
SPAC17G6.14c|uap56|I|TREX	SPAC17G6.14c|uap56|I|TREX	2	2	2	>SPAC17G6.14c|uap56|I|TREX complex subunit, ATP-dependent RNA helicase Uap56	1	2	2	2	2	1	2	1	2	1	4.1	4.1	4.1	49.231	434	434	0	4.4615	By MS/MS	By MS/MS	4.1	2.5	5787400	4541200	1246200	4541200	0	1	1	2				120	653;4164	True;True	674;4297	1397;9072;9073	1317;8622;8623	1317;8622
SPAC17G6.16c|ysh1|I|mRNA	SPAC17G6.16c|ysh1|I|mRNA	2	2	2	>SPAC17G6.16c|ysh1|I|mRNA cleavage and polyadenylation specificity factor complex endoribonuclease subunit Ysh1	1	2	2	2	2	2	2	2	2	2	2.6	2.6	2.6	85.989	757	757	0	4.2016	By MS/MS	By MS/MS	2.6	2.6	10080000	5107100	4972900	5107100	0	2	2	4				121	2862;4893	True;True	2937;5055	5969;5970;10625;10626	5675;5676;10084;10085	5676;10084
SPAC17G8.01c|trl1|I|tRNA	SPAC17G8.01c|trl1|I|tRNA	3	3	3	>SPAC17G8.01c|trl1|I|tRNA ligase Trl1 (predicted)	1	3	3	3	2	2	2	2	2	2	2.8	2.8	2.8	90.342	787	787	0	4.974	By MS/MS	By MS/MS	1.9	1.9	4489100	1499800	2989300	0	2838900	2	2	4				122	191;1403;2365	True;True;True	199;1439;2421	497;498;2984;4957	462;463;2812;4703	462;2812;4703
SPAC17H9.04c|nrp1|I|RNA-binding	SPAC17H9.04c|nrp1|I|RNA-binding	6	6	6	>SPAC17H9.04c|nrp1|I|RNA-binding protein	1	6	6	6	6	5	6	5	6	5	13.6	13.6	13.6	66.396	604	604	0	28.94	By MS/MS	By MS/MS	13.6	10.4	126590000	60544000	66048000	54055000	59644000	7	5	12				123	195;400;1531;2541;2652;3243	True;True;True;True;True;True	203;412;1567;2609;2724;3335;3336	505;506;873;874;3240;5344;5345;5558;5559;6828;6829;6830;6831	470;471;823;3049;5077;5078;5287;5288;6486;6487;6488;6489	470;823;3049;5077;5287;6487	44	150
SPAC17H9.12c|SPAC17H9.12c|I|mitochondrial	SPAC17H9.12c|SPAC17H9.12c|I|mitochondrial	1	1	1	>SPAC17H9.12c|SPAC17H9.12c|I|mitochondrial cytochrome c-heme linkage protein Cyc2 (predicted)	1	1	1	1	1	1	1	1	1	1	5.3	5.3	5.3	29.375	266	266	0	2.7474	By MS/MS	By MS/MS	5.3	5.3	4727400	2805000	1922500	0	1825800	1	1	2				124	2498	TRUE	2563	5240;5241	4972;4973	4972
SPAC17H9.13c|SPAC17H9.13c|I|glutamate	SPAC17H9.13c|SPAC17H9.13c|I|glutamate	10	10	10	>SPAC17H9.13c|SPAC17H9.13c|I|glutamate 5-kinase (predicted)	1	10	10	10	10	9	10	9	10	9	29.1	29.1	29.1	43.933	402	402	0	32.321	By MS/MS	By MS/MS	29.1	26.9	493230000	213440000	279790000	206470000	272690000	10	9	19				125	155;327;1439;1667;1792;2784;3610;3747;4194;4644	True;True;True;True;True;True;True;True;True;True	163;338;1475;1708;1835;2858;3729;3871;4329;4795	430;431;744;745;3044;3045;3555;3556;3812;5820;5821;7859;7860;8155;8156;9131;9132;10091;10092	397;398;704;705;2868;2869;3354;3355;3614;5533;5534;7485;7486;7773;7774;8679;8680;9575;9576	398;705;2869;3354;3614;5533;7485;7774;8679;9576
SPAC17H9.14c|pdi2|I|protein	SPAC17H9.14c|pdi2|I|protein	5	5	5	>SPAC17H9.14c|pdi2|I|protein disulfide isomerase	1	5	5	5	4	5	4	5	4	5	15.6	15.6	15.6	40.691	359	359	0	16.855	By MS/MS	By MS/MS	12.8	15.6	70199000	37284000	32915000	33760000	34783000	4	5	9				126	2156;2543;2930;4070;4157	True;True;True;True;True	2205;2611;3008;4203;4290	4533;4534;5348;6102;6103;8896;8897;9057;9058	4298;4299;5081;5804;5805;8463;8464;8607;8608	4298;5081;5804;8463;8607
SPAC1805.05|cki3|I|serine/threonine	SPAC1805.05|cki3|I|serine/threonine	2	2	2	>SPAC1805.05|cki3|I|serine/threonine protein kinase Cki3	1	2	2	2	2	2	2	2	2	2	5.5	5.5	5.5	50.214	439	439	0	13.317	By MS/MS	By MS/MS	5.5	5.5	13892000	7522600	6369700	7536600	6035200	2	0	2				127	644;4073	True;True	664;4206	1381;1382;8904;8905	1302;8470;8471	1302;8471
SPAC1805.13|rpl14|I|60S	SPAC1805.13|rpl14|I|60S	3	3	3	>SPAC1805.13|rpl14|I|60S ribosomal protein L14 (predicted)	1	3	3	3	3	3	3	3	3	3	26.9	26.9	26.9	15.21	134	134	0	13.162	By MS/MS	By MS/MS	26.9	26.9	36921000	18723000	18198000	18033000	17972000	5	3	8				128	282;2563;5273	True;True;True	291;2632;5443	668;669;5388;5389;11451;11452	628;629;5119;5120;5121;10905;10906;10907	629;5119;10905	45	63
SPAC1805.16c|SPAC1805.16c|I|purine	SPAC1805.16c|SPAC1805.16c|I|purine	11	11	11	>SPAC1805.16c|SPAC1805.16c|I|purine nucleoside phosphorylase (predicted)	1	11	11	11	10	9	10	9	10	9	46.7	46.7	46.7	34.238	315	315	0	60.843	By MS/MS	By MS/MS	40.3	40	248690000	130450000	118240000	123680000	119060000	13	11	24				129	621;715;1129;1435;1637;3205;4357;4523;4869;4973;5282	True;True;True;True;True;True;True;True;True;True;True	641;738;1161;1471;1676;3285;4495;4669;5030;5136;5452	1343;1344;1521;2346;2347;3039;3494;3495;3496;3497;6656;6657;9444;9445;9836;9837;10585;10586;10764;11470;11471;11472;11473	1265;1266;1436;2212;2213;2214;2215;2863;3294;3295;3296;3297;6327;6328;8974;8975;9338;9339;10045;10225;10926;10927;10928;10929	1265;1436;2215;2863;3296;6328;8974;9338;10045;10225;10926
SPAC1805.17|crm1|I|importin	SPAC1805.17|crm1|I|importin	21	21	21	>SPAC1805.17|crm1|I|importin family nuclear export receptor Crm1	1	21	21	21	21	2	21	2	21	2	24.3	24.3	24.3	123.57	1078	1078	0	72.305	By MS/MS	By matching	24.3	1.6	292160000	288590000	3567000	288590000	3387600	23	0	23				130	8;481;484;587;878;957;1070;1290;1307;1791;1831;1969;2610;2750;3018;3235;3236;3591;3653;4537;5287	True;True;True;True;True;True;True;True;True;True;True;True;True;True;True;True;True;True;True;True;True	8;496;499;606;907;986;1102;1325;1342;1834;1874;2014;2680;2824;3097;3326;3327;3710;3772;4683;5457	15;1043;1044;1047;1267;1846;2008;2234;2686;2687;2723;3811;3895;4166;5465;5755;6273;6811;6812;7820;7940;9863;11481;11482	15;977;978;981;1194;1749;1750;1894;2107;2539;2572;3613;3692;3952;5195;5468;5964;6471;6472;7446;7560;9365;10938	15;977;981;1194;1749;1894;2107;2539;2572;3613;3692;3952;5195;5468;5964;6471;6472;7446;7560;9365;10938
SPAC1834.01|sup45|I|translation	SPAC1834.01|sup45|I|translation	3	3	3	>SPAC1834.01|sup45|I|translation release factor eRF1	1	3	3	3	3	2	3	2	3	2	6.9	6.9	6.9	48.803	433	433	0	12.142	By MS/MS	By MS/MS	6.9	5.3	31272000	16124000	15148000	14899000	15612000	2	2	4				131	1391;3082;4393	True;True;True	1427;3162;4532	2963;6398;6399;9515;9516	2789;6085;6086;9043	2789;6085;9043
SPAC1834.02|aro1|I|pentafunctional	SPAC1834.02|aro1|I|pentafunctional	18	18	18	>SPAC1834.02|aro1|I|pentafunctional aromatic polypeptide Aro1 (predicted)	1	18	18	18	15	14	15	14	15	14	13.6	13.6	13.6	173.78	1573	1573	0	35.808	By MS/MS	By MS/MS	11.6	10.4	142190000	64620000	77567000	58624000	79660000	15	12	27				132	78;524;1301;1575;1924;2004;2454;3310;3437;3454;3674;4141;4241;4318;4889;4897;5007;5324	True;True;True;True;True;True;True;True;True;True;True;True;True;True;True;True;True;True	85;539;1336;1612;1968;2049;2516;3419;3548;3565;3795;4274;4376;4455;5051;5059;5170;5494	178;1122;1123;2710;2711;3373;3374;4076;4230;5149;5150;7191;7468;7469;7498;7982;7983;9027;9028;9215;9370;9371;10619;10620;10636;10833;10834;11556;11557	172;1052;1053;2561;2562;3175;3866;4012;4886;4887;6845;7104;7105;7131;7602;8582;8583;8754;8900;8901;8902;10078;10079;10096;10290;10291;11004	172;1052;2561;3175;3866;4012;4886;6845;7105;7131;7602;8583;8754;8901;10078;10096;10290;11004
SPAC1834.08|mak1|I|histidine	SPAC1834.08|mak1|I|histidine	7	7	7	>SPAC1834.08|mak1|I|histidine kinase Mak1	1	7	7	7	7	5	7	5	7	5	6	6	6	184.58	1639	1639	0	10.308	By MS/MS	By MS/MS	6	4	53286000	28383000	24903000	29568000	22464000	7	1	8				133	130;362;3512;3787;4094;4216;4806	True;True;True;True;True;True;True	138;373;3627;3912;4227;4351;4965	389;805;806;7622;8234;8235;8938;8939;9171;9172;10456;10457	359;761;762;7257;7846;8501;8717;9919	359;762;7257;7846;8501;8717;9919
SPAC1834.11c|sec18|I|secretory	SPAC1834.11c|sec18|I|secretory	2	1	1	>SPAC1834.11c|sec18|I|secretory pathway protein Sec18 (predicted)	1	2	1	1	2	2	1	1	1	1	2.8	1.3	1.3	87.553	792	792	0	3.8899	By MS/MS	By MS/MS	2.8	2.8	5751800	2302500	3449300	0	3275800	1	1	2				134	1561;2099	False;True	1598;2145	3339;3340;4405;4406	3139;3140;4182;4183	3139;4182
SPAC1851.03|ckb1|I|CK2	SPAC1851.03|ckb1|I|CK2	1	1	1	>SPAC1851.03|ckb1|I|CK2 family regulatory subunit Ckb1	1	1	1	1	1	1	1	1	1	1	3.9	3.9	3.9	26.677	231	231	0	3.5381	By MS/MS	By MS/MS	3.9	3.9	11999000	6627400	5371300	0	5101100	1	1	2				135	1857	TRUE	1900	3943;3944	3739;3740	3740
SPAC18B11.11|SPAC18B11.11|I|GTPase	SPAC18B11.11|SPAC18B11.11|I|GTPase	1	1	1	>SPAC18B11.11|SPAC18B11.11|I|GTPase activating protein (predicted)	1	1	1	1	0	1	0	1	0	1	0.6	0.6	0.6	149.19	1294	1294	0.0085745	1.0406	By matching	By MS/MS	0	0.6	0	0	0	0	0	0	1	1				136	4776	TRUE	4933	10392	9854	9854
SPAC18G6.04c|shm2|I|serine	SPAC18G6.04c|shm2|I|serine	10	9	9	>SPAC18G6.04c|shm2|I|serine hydroxymethyltransferase Shm2 (predicted)	1	10	9	9	9	9	8	9	8	9	26.2	24.4	24.4	53.978	488	488	0	29.238	By MS/MS	By MS/MS	24.6	24.4	185900000	87585000	98311000	92544000	88406000	8	8	16				137	14;224;1073;2133;3174;4545;4850;5078;5386;5431	True;True;True;True;True;True;True;True;False;True	14;233;1105;2181;3254;4691;5011;5243;5559;5604	25;555;556;2239;2240;4489;4490;6596;6597;9881;9882;10549;10550;10964;10965;11684;11783;11784	25;518;2112;2113;4258;4259;6272;6273;9380;9381;10007;10008;10415;10416;11130;11215;11216	25;518;2112;4258;6272;9380;10008;10416;11130;11216
SPAC18G6.05c|gcn1|I|translation	SPAC18G6.05c|gcn1|I|translation	14	14	14	>SPAC18G6.05c|gcn1|I|translation elongation regulator Gcn1 (predicted)	1	14	14	14	10	12	10	12	10	12	6.4	6.4	6.4	297.33	2670	2670	0	24.363	By MS/MS	By MS/MS	4.8	5.5	61009000	26664000	34345000	28767000	30514000	7	10	17				138	293;453;1055;1109;1326;2624;2985;3327;3463;3736;4158;4230;4682;4943	True;True;True;True;True;True;True;True;True;True;True;True;True;True	303;467;1086;1141;1361;2694;3064;3436;3575;3860;4291;4365;4835;5106	688;689;983;2205;2206;2309;2755;2756;5488;5489;6210;7224;7225;7514;7515;8136;9059;9060;9196;10170;10171;10717	649;919;2081;2175;2601;2602;5217;5218;5906;6875;7147;7148;7752;8609;8610;8737;9649;10178	649;919;2081;2175;2601;5218;5906;6875;7148;7752;8610;8737;9649;10178
SPAC18G6.14c|rps7|I|40S	SPAC18G6.14c|rps7|I|40S	7	7	7	>SPAC18G6.14c|rps7|I|40S ribosomal protein S7 (predicted)	1	7	7	7	7	6	7	6	7	6	40	40	40	21.947	195	195	0	27.393	By MS/MS	By MS/MS	40	34.4	261340000	152300000	109040000	150520000	105330000	6	9	15				139	233;992;1896;2720;3577;4511;4512	True;True;True;True;True;True;True	242;1023;1939;2794;3696;4656;4657	575;576;2074;4022;4023;5693;5694;5695;5696;7782;7783;9804;9805;9806;9807	536;537;1958;3813;3814;3815;5410;5411;5412;5413;7409;7410;9309;9310;9311;9312	537;1958;3814;5413;7409;9309;9312
SPAC1952.06c|SPAC1952.06c|I|spliceosomal	SPAC1952.06c|SPAC1952.06c|I|spliceosomal	1	1	1	>SPAC1952.06c|SPAC1952.06c|I|spliceosomal complex subunit (predicted)	1	1	1	1	1	1	1	1	1	1	1.2	1.2	1.2	64.589	564	564	0.0011455	1.4858	By MS/MS	By MS/MS	1.2	1.2	8794000	3341500	5452500	0	5178100	1	1	2				140	1201	TRUE	1234	2487;2488	2353;2354	2353
SPAC1952.09c|SPAC1952.09c|I|acetyl-CoA	SPAC1952.09c|SPAC1952.09c|I|acetyl-CoA	1	1	1	>SPAC1952.09c|SPAC1952.09c|I|acetyl-CoA hydrolase (predicted)	1	1	1	1	0	1	0	1	0	1	3.1	3.1	3.1	57.915	521	521	0.0044693	1.3273	By matching	By MS/MS	0	3.1	3081600	0	3081600	0	2926600	0	1	1				141	2152	TRUE	2201	4522	4291	4291
SPAC1952.11c|ure2|I|ATP-independent,	SPAC1952.11c|ure2|I|ATP-independent,	6	6	6	>SPAC1952.11c|ure2|I|ATP-independent, nickel dependent urease Ure2	1	6	6	6	5	5	5	5	5	5	10.5	10.5	10.5	91.181	835	835	0	19.586	By MS/MS	By MS/MS	9.2	8.6	74164000	35160000	39004000	36573000	35629000	4	4	8				142	1447;2344;2623;2691;3197;3837	True;True;True;True;True;True	1483;2400;2693;2765;3277;3965	3061;3062;4917;4918;5487;5629;5630;6641;6642;8428	2885;2886;4667;4668;5216;5353;6314;8018	2886;4667;5216;5353;6314;8018
SPAC1952.16|rga9|I|RhoGAP,	SPAC1952.16|rga9|I|RhoGAP,	2	2	2	>SPAC1952.16|rga9|I|RhoGAP, GTPase activator towards Rho/Rac/Cdc42-like small GTPases (predicted)	1	2	2	2	2	1	2	1	2	1	4	4	4	76.867	670	670	0	3.6356	By MS/MS	By matching	4	2.2	17024000	11954000	5069900	11954000	0	2	0	2				143	158;4219	True;True	166;4354	434;9176;9177	401;8721	401;8721
SPAC19A8.04|erg5|I|C-22	SPAC19A8.04|erg5|I|C-22	12	12	12	>SPAC19A8.04|erg5|I|C-22 sterol desaturase Erg5	1	12	12	12	12	10	12	10	12	10	25.4	25.4	25.4	62.27	543	543	0	35.033	By MS/MS	By MS/MS	25.4	20.1	175320000	96671000	78649000	85464000	85899000	12	11	23				144	248;407;576;888;1362;1427;1600;1812;2294;2408;3030;5205	True;True;True;True;True;True;True;True;True;True;True;True	257;419;595;917;1398;1463;1638;1855;2349;2466;3109;5373	606;607;887;888;1242;1243;1859;1860;2824;2825;3024;3025;3422;3423;3856;3857;4821;5045;5046;6295;11207;11208	567;568;569;834;1167;1168;1763;1764;2668;2669;2670;2849;2850;3222;3223;3224;3656;3657;4576;4790;5986;10654;10655	569;834;1168;1764;2668;2849;3224;3656;4576;4790;5986;10655	46	390
SPAC19A8.15|trp2|I|tryptophan	SPAC19A8.15|trp2|I|tryptophan	12	12	12	>SPAC19A8.15|trp2|I|tryptophan synthase (predicted)	1	12	12	12	12	12	12	12	12	12	23.7	23.7	23.7	75.436	697	697	0	47.598	By MS/MS	By MS/MS	23.7	23.7	264180000	125760000	138420000	123230000	133990000	12	12	24				145	85;275;547;666;1462;2076;2091;2097;2833;3627;3678;4406	True;True;True;True;True;True;True;True;True;True;True;True	92;284;563;687;1498;2121;2137;2143;2908;3746;3799;4545	190;191;656;657;1182;1183;1421;1422;3093;3094;4358;4359;4389;4390;4401;4402;5908;5909;7891;7892;7989;7990;9539;9540	187;188;189;616;617;1111;1112;1341;1342;2913;2914;4137;4164;4165;4166;4179;4180;5624;5625;7513;7514;7608;7609;9062	188;617;1111;1342;2914;4137;4166;4180;5624;7513;7608;9062
SPAC19G12.06c|hta2|I|histone;SPCC622.08c|hta1|III|histone;SPBC11B10.10c|pht1|II|histone	SPAC19G12.06c|hta2|I|histone;SPCC622.08c|hta1|III|histone;SPBC11B10.10c|pht1|II|histone	1;1;1	1;1;1	1;1;1	>SPAC19G12.06c|hta2|I|histone H2A beta;>SPCC622.08c|hta1|III|histone H2A alpha;>SPBC11B10.10c|pht1|II|histone H2A variant H2A.Z, Pht1	3	1	1	1	1	1	1	1	1	1	5.3	5.3	5.3	13.776	131	131;132;139	0	1.721	By MS/MS	By MS/MS	5.3	5.3	22653000	10028000	12625000	0	11990000	1	1	2				146	1850	TRUE	1893	3930;3931	3727;3728	3727
SPAC19G12.08|scs7|I|sphingosine	SPAC19G12.08|scs7|I|sphingosine	7	7	7	>SPAC19G12.08|scs7|I|sphingosine hydroxylase Scs7	1	7	7	7	7	7	7	7	7	7	24.2	24.2	24.2	40.229	347	347	0	15.804	By MS/MS	By MS/MS	24.2	24.2	116540000	66440000	50099000	60428000	53591000	8	5	13				147	797;1881;2458;3651;3901;4630;4760	True;True;True;True;True;True;True	824;1924;2520;3770;4029;4781;4917	1691;1692;3997;3998;5156;5157;7936;7937;8542;8543;10063;10064;10357;10358	1600;1601;1602;3788;4893;4894;7557;7558;8124;9548;9824;9825;9826	1602;3788;4893;7557;8124;9548;9825
SPAC19G12.10c|cpy1|I|vacuolar	SPAC19G12.10c|cpy1|I|vacuolar	7	7	7	>SPAC19G12.10c|cpy1|I|vacuolar carboxypeptidase Y	1	7	7	7	7	5	7	5	7	5	7.6	7.6	7.6	114.24	1002	1002	0	18.752	By MS/MS	By MS/MS	7.6	5	121290000	90551000	30740000	73017000	46729000	6	4	10				148	76;796;887;1217;1460;2617;4427	True;True;True;True;True;True;True	83;823;916;1250;1496;2687;4568	175;1689;1690;1858;2516;2517;3089;3090;5477;5478;9603;9604	170;1598;1599;1762;2382;2911;5206;5207;9118;9119	170;1599;1762;2382;2911;5206;9118
SPAC19G12.15c|tpp1|I|trehalose-6-phosphate	SPAC19G12.15c|tpp1|I|trehalose-6-phosphate	3	3	3	>SPAC19G12.15c|tpp1|I|trehalose-6-phosphate phosphatase Tpp1	1	3	3	3	2	3	2	3	2	3	4.9	4.9	4.9	93.876	817	817	0	8.7327	By MS/MS	By MS/MS	2.8	4.9	27222000	17560000	9661800	17560000	0	1	3	4				149	42;2814;4875	True;True;True	43;2888;5037	82;83;5875;5876;10596	80;81;5590;10054	80;5590;10054
SPAC1B1.02c|SPAC1B1.02c|I|NAD/NADH	SPAC1B1.02c|SPAC1B1.02c|I|NAD/NADH	10	10	10	>SPAC1B1.02c|SPAC1B1.02c|I|NAD/NADH kinase (predicted)	1	10	10	10	8	9	8	9	8	9	24.4	24.4	24.4	60.708	537	537	0	27.795	By MS/MS	By MS/MS	19.4	23.1	135550000	73418000	62134000	67861000	64564000	6	9	15				150	142;420;713;798;799;1502;2360;3403;3497;4139	True;True;True;True;True;True;True;True;True;True	150;433;736;825;826;1538;2416;3514;3610;4272	407;408;915;916;1517;1518;1693;1694;1695;3175;3176;4949;7394;7580;7581;9024;9025	376;377;857;858;1432;1433;1603;1604;2988;2989;4696;7031;7032;7215;8579;8580	376;857;1433;1603;1604;2988;4696;7032;7215;8579
SPAC1B2.03c|SPAC1B2.03c|I|GNS1/SUR4	SPAC1B2.03c|SPAC1B2.03c|I|GNS1/SUR4	3	3	3	>SPAC1B2.03c|SPAC1B2.03c|I|GNS1/SUR4 family protein (predicted)	1	3	3	3	3	3	3	3	3	3	16.8	16.8	16.8	38.337	334	334	0	21.08	By MS/MS	By MS/MS	16.8	16.8	129820000	67174000	62647000	63254000	63415000	4	3	7				151	59;3181;4445	True;True;True	63;3261;4587	125;126;127;6608;6609;9660;9661	123;124;125;6284;6285;9168;9169	123;6284;9168
SPAC1B3.01c|SPAC1B3.01c|I|uracil	SPAC1B3.01c|SPAC1B3.01c|I|uracil	1	1	1	>SPAC1B3.01c|SPAC1B3.01c|I|uracil phosphoribosyltransferase (predicted)	1	1	1	1	0	1	0	1	0	1	7.3	7.3	7.3	24.466	219	219	0.0054645	1.1667	By matching	By MS/MS	0	7.3	3693600	0	3693600	0	3507700	0	1	1				152	2788	TRUE	2862	5827	5541	5541
SPAC1B3.03c|wis2|I|cyclophilin	SPAC1B3.03c|wis2|I|cyclophilin	3	3	3	>SPAC1B3.03c|wis2|I|cyclophilin family peptidyl-prolyl cis-trans isomerase Wis2	1	3	3	3	3	3	3	3	3	3	10.4	10.4	10.4	40.161	356	356	0	5.9864	By MS/MS	By MS/MS	10.4	10.4	46680000	26960000	19720000	27575000	18113000	2	1	3				153	3344;3657;5333	True;True;True	3455;3776;5504	7271;7272;7947;7948;11572;11573	6918;7567;7568;11018	6918;7568;11018
SPAC1B3.13|nan1|I|U3	SPAC1B3.13|nan1|I|U3	1	1	1	>SPAC1B3.13|nan1|I|U3 snoRNP-associated protein Nan1 (predicted)	1	1	1	1	1	1	1	1	1	1	1.2	1.2	1.2	88.937	806	806	0	1.6184	By MS/MS	By MS/MS	1.2	1.2	4321000	1777000	2544000	0	2416000	1	1	2				154	2763	TRUE	2837	5776;5777	5488;5489	5488
SPAC1B3.14|vma3|I|V-type	SPAC1B3.14|vma3|I|V-type	1	1	1	>SPAC1B3.14|vma3|I|V-type ATPase V0 subunit c (proteolipid subunit)	1	1	1	1	1	1	1	1	1	1	11.2	11.2	11.2	16.325	161	161	0	5.5878	By MS/MS	By MS/MS	11.2	11.2	11959000	7205700	4753500	0	4514400	1	1	2				155	166	TRUE	174	449;450	415;416	415
SPAC1B3.16c|vht1|I|vitamin	SPAC1B3.16c|vht1|I|vitamin	3	3	3	>SPAC1B3.16c|vht1|I|vitamin H transmembrane transporter Vht1	1	3	3	3	0	3	0	3	0	3	7.4	7.4	7.4	62.821	568	568	0	7.0161	By matching	By MS/MS	0	7.4	18207000	0	18207000	0	17291000	0	3	3				156	2059;3496;5164	True;True;True	2104;3609;5331	4329;7579;11135	4110;7214;10587	4110;7214;10587
SPAC1D4.04|cct2|I|chaperonin-containing	SPAC1D4.04|cct2|I|chaperonin-containing	5	5	5	>SPAC1D4.04|cct2|I|chaperonin-containing T-complex beta subunit Cct2	1	5	5	5	5	4	5	4	5	4	13.5	13.5	13.5	56.676	527	527	0	14.311	By MS/MS	By MS/MS	13.5	10.8	45158000	30024000	15134000	26527000	17869000	4	4	8				157	1455;1674;2580;3063;3364	True;True;True;True;True	1491;1715;2650;3143;3475	3079;3080;3571;3572;5421;6362;6363;7308;7309	2903;3369;3370;5150;6050;6051;6952;6953	2903;3370;5150;6051;6952
SPAC1F12.07|ser1|I|phosphoserine	SPAC1F12.07|ser1|I|phosphoserine	6	6	6	>SPAC1F12.07|ser1|I|phosphoserine aminotransferase (predicted)	1	6	6	6	5	6	5	6	5	6	20.8	20.8	20.8	42.797	389	389	0	27.701	By MS/MS	By MS/MS	18.3	20.8	84063000	33922000	50141000	38717000	42823000	3	6	9				158	1766;2746;2904;2931;3301;4119	True;True;True;True;True;True	1809;2820;2980;3009;3410;4252	3761;5749;5750;6049;6050;6104;6105;6986;6987;8989;8990	3560;5462;5463;5752;5806;6645;6646;8546;8547	3560;5463;5752;5806;6646;8546
SPAC1F3.06c|spo15|I|mitotic	SPAC1F3.06c|spo15|I|mitotic	13	13	13	>SPAC1F3.06c|spo15|I|mitotic and mieotic spindle pole body protein Spo15	1	13	13	13	12	9	12	9	12	9	8.1	8.1	8.1	222.78	1957	1957	0	21.536	By MS/MS	By MS/MS	7.4	5.6	112020000	68109000	43909000	65676000	44133000	10	7	17				159	635;708;1102;1738;2243;2551;3006;3255;4012;4106;4148;4212;4744	True;True;True;True;True;True;True;True;True;True;True;True;True	655;730;1134;1780;2297;2620;3085;3351;4145;4239;4281;4347;4901	1365;1366;1503;1504;2296;2297;3702;3703;4713;4714;5367;5368;6247;6860;8769;8770;8963;9042;9163;9164;10326	1285;1421;1422;2163;2164;3503;3504;4470;5099;5939;6515;8334;8335;8527;8594;8711;9794	1285;1422;2164;3503;4470;5099;5939;6515;8335;8527;8594;8711;9794
SPAC1F5.02|pdi1|I|protein	SPAC1F5.02|pdi1|I|protein	5	5	5	>SPAC1F5.02|pdi1|I|protein disulfide isomerase (predicted)	1	5	5	5	4	3	4	3	4	3	11.6	11.6	11.6	54.88	492	492	0	8.5359	By MS/MS	By MS/MS	9.3	7.3	33154000	23499000	9655700	16520000	16149000	4	2	6				160	1146;1410;3720;4077;5364	True;True;True;True;True	1178;1446;3843;4210;5536	2377;2997;8089;8090;8909;8910;11640	2243;2824;7700;7701;8475;11089	2243;2824;7700;8475;11089
SPAC1F5.06|lsh1|I|ER	SPAC1F5.06|lsh1|I|ER	3	3	3	>SPAC1F5.06|lsh1|I|ER heat shock protein Lsh1 (predicted)	1	3	3	3	1	3	1	3	1	3	3.9	3.9	3.9	94.897	848	848	0	8.1953	By MS/MS	By MS/MS	1.1	3.9	6294200	3515400	2778800	0	2639000	1	3	4				161	13;246;4035	True;True;True	13;255;4168	24;600;601;8817	24;561;562;8380	24;561;8380
SPAC1F5.11c|tra2|I|NuA4	SPAC1F5.11c|tra2|I|NuA4	20	18	18	>SPAC1F5.11c|tra2|I|NuA4 complex phosphatidylinositol pseudokinase complex subunit Tra2	1	20	18	18	18	12	16	11	16	11	5.9	5.5	5.5	420.78	3655	3655	0	32.19	By MS/MS	By MS/MS	5.1	3.6	113880000	60950000	52931000	57695000	53523000	15	11	26				162	212;316;580;641;752;989;1021;1980;2605;2658;2891;2898;2947;3211;3533;4108;4641;4890;4949;5418	True;True;True;True;True;False;True;True;True;True;True;False;True;True;True;True;True;True;True;True	220;327;599;661;776;1020;1052;2025;2675;2730;2967;2974;3026;3291;3649;4241;4792;5052;5112;5591	535;724;725;1257;1376;1603;1604;2070;2140;2141;4185;5457;5568;5569;6027;6039;6040;6138;6139;6667;7663;8966;8967;10083;10621;10622;10726;10727;11757;11758	501;684;685;1184;1297;1516;1517;1955;2025;3969;5188;5296;5297;5731;5742;5743;5837;5838;6338;7294;8529;8530;9568;10080;10081;10187;10188;11190;11191	501;685;1184;1297;1516;1955;2025;3969;5188;5296;5731;5742;5838;6338;7294;8529;9568;10080;10188;11190
SPAC1F7.05|cdc22|I|ribonucleoside	SPAC1F7.05|cdc22|I|ribonucleoside	16	16	16	>SPAC1F7.05|cdc22|I|ribonucleoside reductase large subunit Cdc22	1	16	16	16	15	15	15	15	15	15	28.2	28.2	28.2	91.998	811	811	0	48.845	By MS/MS	By MS/MS	26	25.4	365740000	192740000	173000000	182140000	174900000	16	15	31				163	79;592;1393;1636;1832;1867;2098;2311;2571;2970;3159;4659;4691;4771;4907;5254	True;True;True;True;True;True;True;True;True;True;True;True;True;True;True;True	86;611;1429;1675;1875;1910;2144;2366;2641;3049;3239;4811;4844;4928;5069;5423	179;1276;1277;2966;2967;3492;3493;3896;3897;3969;3970;4403;4404;4851;4852;5403;5404;6181;6182;6555;6556;10122;10123;10224;10381;10382;10383;10384;10654;10655;11412;11413	173;1201;1202;2792;2793;3292;3293;3693;3694;3761;3762;3763;4181;4600;4601;5133;5134;5878;5879;6232;9602;9603;9604;9700;9845;9846;9847;10115;10116;10870;10871	173;1202;2792;3292;3693;3762;4181;4601;5134;5879;6232;9604;9700;9847;10116;10870
SPAC1F7.08|fio1|I|iron	SPAC1F7.08|fio1|I|iron	1	1	1	>SPAC1F7.08|fio1|I|iron transport multicopper oxidase Fio1	1	1	1	1	0	1	0	1	0	1	2.3	2.3	2.3	69.907	622	622	0	2.5708	By matching	By MS/MS	0	2.3	9210400	0	9210400	0	8747000	0	1	1				164	768	TRUE	794	1634	1546	1546
SPAC1F7.12|yak3|I|aldose	SPAC1F7.12|yak3|I|aldose	7	7	7	>SPAC1F7.12|yak3|I|aldose reductase ARK13 family YakC	1	7	7	7	7	6	7	6	7	6	32.6	32.6	32.6	37.71	340	340	0	23.43	By MS/MS	By MS/MS	32.6	28.5	101900000	55207000	46696000	54182000	45371000	8	6	14				165	1024;1957;2705;3481;4156;5297;5319	True;True;True;True;True;True;True	1055;2001;2779;3594;4289;5467;5489	2146;4137;4138;5660;5661;7550;7551;9055;9056;11500;11501;11549;11550	2028;3924;3925;3926;5379;5380;7185;7186;7187;8605;8606;10956;10957;10999	2028;3926;5380;7187;8606;10957;10999
SPBC839.04|rpl803|II|60S;SPBC2F12.07c|rpl802|II|60S;SPAC1F7.13c|rpl801|I|60S	SPBC839.04|rpl803|II|60S;SPBC2F12.07c|rpl802|II|60S;SPAC1F7.13c|rpl801|I|60S	7;7;7	7;7;7	7;7;7	>SPBC839.04|rpl803|II|60S ribosomal protein L8 (predicted);>SPBC2F12.07c|rpl802|II|60S ribosomal protein L8 (predicted);>SPAC1F7.13c|rpl801|I|60S ribosomal protein L8 (predicted)	3	7	7	7	7	7	7	7	7	7	31.6	31.6	31.6	27.1	253	253;253;253	0	21.969	By MS/MS	By MS/MS	31.6	31.6	488650000	209550000	279100000	224990000	249620000	10	8	18				166	1701;1729;1991;2474;3977;4206;4476	True;True;True;True;True;True;True	1743;1771;2036;2537;4109;4341;4620	3623;3624;3679;3680;4206;4207;5189;5190;8695;8696;9150;9151;9152;9153;9729;9730	3420;3421;3422;3481;3482;3991;4924;4925;4926;4927;8266;8267;8699;8700;8701;8702;9238;9239	3421;3481;3991;4925;8267;8699;9238
SPAC1F8.07c|pdc101|I|pyruvate	SPAC1F8.07c|pdc101|I|pyruvate	31	31	31	>SPAC1F8.07c|pdc101|I|pyruvate decarboxylase (predicted)	1	31	31	31	30	30	30	30	30	30	56.3	56.3	56.3	61.547	568	568	0	273.32	By MS/MS	By MS/MS	56.3	56.2	8980300000	4101400000	4878900000	3651500000	4322900000	54	53	107				167	11;24;72;396;423;424;539;900;947;1197;1504;1505;1753;1835;2239;2400;2442;2452;2516;2993;3088;3089;3140;3367;3582;3811;4417;4460;4464;5116;5117	True;True;True;True;True;True;True;True;True;True;True;True;True;True;True;True;True;True;True;True;True;True;True;True;True;True;True;True;True;True;True	11;25;78;79;408;436;437;555;929;976;1230;1540;1541;1796;1878;2292;2456;2503;2514;2582;2583;3072;3168;3169;3220;3478;3701;3937;3938;4558;4603;4607;4608;5282;5283;5284	20;21;46;47;48;49;160;161;162;163;164;165;166;167;168;169;866;867;922;923;924;925;1164;1165;1166;1167;1885;1886;1887;1888;1986;1987;1988;1989;2481;2482;3178;3179;3180;3181;3182;3734;3735;3736;3737;3901;3902;3903;4703;4704;4705;4706;5028;5029;5121;5122;5123;5124;5143;5144;5145;5146;5277;5278;5279;5280;5281;5282;5283;5284;6224;6410;6411;6412;6413;6516;6517;7315;7316;7317;7318;7789;7790;7791;8371;83…	20;21;44;45;46;47;153;154;155;156;157;158;159;160;161;162;163;817;864;865;866;867;1092;1093;1094;1095;1786;1787;1788;1789;1875;1876;1877;1878;2347;2348;2991;2992;2993;2994;2995;2996;3534;3535;3536;3698;3699;3700;4458;4459;4460;4461;4462;4463;4774;4775;4861;4862;4863;4880;4881;4882;5008;5009;5010;5011;5012;5013;5014;5015;5016;5919;6097;6098;6099;6195;6196;6958;6959;6960;6961;7416;7417;7418;7972;79…	20;46;162;817;864;867;1094;1786;1878;2348;2992;2995;3534;3700;4462;4775;4863;4880;5014;5919;6097;6099;6195;6961;7416;7977;9104;9200;9207;10490;10494	47;48;49;50;51	9;153;249;331;443
SPAC20G4.07c|erg4|I|C-24(28)	SPAC20G4.07c|erg4|I|C-24(28)	1	1	1	>SPAC20G4.07c|erg4|I|C-24(28) sterol reductase Erg4	1	1	1	1	1	1	1	1	1	1	2.4	2.4	2.4	52.545	453	453	0	2.2412	By matching	By MS/MS	2.4	2.4	1126000	526800	599180	0	569030	0	1	1				168	1970	TRUE	2015	4167;4168	3953	3953
SPAC20G8.03|itr2|I|MFS	SPAC20G8.03|itr2|I|MFS	4	4	4	>SPAC20G8.03|itr2|I|MFS myo-inositol transmembrane transporter	1	4	4	4	4	1	4	1	4	1	7.4	7.4	7.4	61.136	557	557	0	2.7481	By MS/MS	By matching	7.4	2.3	9073200	7606000	1467200	7606000	0	4	0	4				169	1503;2084;3226;4881	True;True;True;True	1539;2130;3307;5043	3177;4375;4376;6699;10607	2990;4152;6368;10065	2990;4152;6368;10065
SPAC20G8.05c|cdc15|I|extended	SPAC20G8.05c|cdc15|I|extended	1	1	1	>SPAC20G8.05c|cdc15|I|extended Fer/CIP4 (EFC) domain protein Cdc15	1	1	1	1	1	0	1	0	1	0	1.2	1.2	1.2	102.12	927	927	0	1.6666	By MS/MS	By matching	1.2	0	1655100	1655100	0	1655100	0	1	0	1				170	1587	TRUE	1624	3395	3197	3197
SPAC20G8.06|not1|I|CCR4-Not	SPAC20G8.06|not1|I|CCR4-Not	7	7	7	>SPAC20G8.06|not1|I|CCR4-Not complex subunit Not1 (predicted)	1	7	7	7	5	6	5	6	5	6	3.3	3.3	3.3	237.13	2100	2100	0	9.4662	By MS/MS	By MS/MS	2.3	2.9	45010000	18765000	26245000	21766000	21924000	5	7	12				171	840;2340;2849;2851;2940;4533;5114	True;True;True;True;True;True;True	869;2396;2924;2926;3018;4679;5280	1772;1773;4911;5944;5945;5948;6122;6123;9857;9858;11039	1676;1677;4660;5652;5653;5656;5823;5824;9358;9359;9360;10486	1676;4660;5652;5656;5824;9358;10486
SPAC20G8.07c|erg2|I|C-8	SPAC20G8.07c|erg2|I|C-8	1	1	1	>SPAC20G8.07c|erg2|I|C-8 sterol isomerase Erg2	1	1	1	1	1	1	1	1	1	1	4.1	4.1	4.1	24.671	219	219	0	1.7754	By MS/MS	By MS/MS	4.1	4.1	8532400	8532400	0	8532400	0	2	1	3				172	299	TRUE	309	698;699	657;658;659	658
SPAC20G8.10c|atg6|I|autophagy	SPAC20G8.10c|atg6|I|autophagy	3	3	3	>SPAC20G8.10c|atg6|I|autophagy associated beclin family protein Atg6	1	3	3	3	3	1	3	1	3	1	6.2	6.2	6.2	53.959	464	464	0	1.8487	By MS/MS	By matching	6.2	3	7072000	4746500	2325600	0	2208600	3	0	3				173	1419;2030;4560	True;True;True	1455;2075;4706	3012;4280;9909;9910	2837;4060;9404	2837;4060;9404
SPAC21E11.07|iba57|I|mitochondrial	SPAC21E11.07|iba57|I|mitochondrial	1	1	1	>SPAC21E11.07|iba57|I|mitochondrial iron-sulfur cluster assembly protein Iba57 (predicted)	1	1	1	1	0	1	0	1	0	1	2.2	2.2	2.2	36.883	325	325	0.0086114	1.0803	By matching	By MS/MS	0	2.2	5871900	0	5871900	0	5576500	0	1	1				174	2094	TRUE	2140	4396	4173	4173
SPAC21E11.08|lcb2|I|serine	SPAC21E11.08|lcb2|I|serine	1	1	1	>SPAC21E11.08|lcb2|I|serine palmitoyltransferase Lcb2 (predicted)	1	1	1	1	1	1	1	1	1	1	3.8	3.8	3.8	67.518	603	603	0	3.207	By MS/MS	By matching	3.8	3.8	5447800	2355700	3092100	0	2936500	1	0	1				175	2699	TRUE	2773	5647;5648	5368	5368
SPAC222.07c|hri2|I|eIF2	SPAC222.07c|hri2|I|eIF2	15	15	15	>SPAC222.07c|hri2|I|eIF2 alpha kinase Hri2	1	15	15	15	13	13	13	13	13	13	25.5	25.5	25.5	73.366	639	639	0	51.226	By MS/MS	By MS/MS	23.8	22.4	386430000	178990000	207440000	177580000	198420000	14	13	27				176	648;827;1342;1376;1508;2053;2054;2805;2806;3027;3366;3531;3871;4153;5293	True;True;True;True;True;True;True;True;True;True;True;True;True;True;True	669;856;1378;1412;1544;2098;2099;2879;2880;3106;3477;3647;3999;4286;5463	1390;1391;1745;2789;2790;2853;2854;3187;3188;3189;4318;4319;4320;5858;5859;5860;6289;6290;7312;7313;7314;7660;8485;8486;9048;9049;9050;11492;11493	1311;1312;1651;2632;2633;2696;3001;3002;3003;4099;4100;4101;5571;5572;5573;5574;5980;5981;6956;6957;7291;8073;8074;8599;8600;10948;10949	1312;1651;2632;2696;3003;4099;4100;5572;5574;5981;6956;7291;8074;8599;10948
SPAC222.11|hem13|I|coproporphyrinogen	SPAC222.11|hem13|I|coproporphyrinogen	2	2	2	>SPAC222.11|hem13|I|coproporphyrinogen III oxidase Hem13 (predicted)	1	2	2	2	1	1	1	1	1	1	8.7	8.7	8.7	36.244	312	312	0	3.8675	By MS/MS	By MS/MS	4.8	3.8	5678000	1677800	4000200	1677800	0	1	1	2				177	1698;4748	True;True	1740;4905	3618;10331	3414;9799	3414;9799
SPAC222.12c|atp2|I|F1-ATPase	SPAC222.12c|atp2|I|F1-ATPase	7	7	7	>SPAC222.12c|atp2|I|F1-ATPase beta subunit Atp2	1	7	7	7	7	7	7	7	7	7	19.8	19.8	19.8	56.875	525	525	0	83.724	By MS/MS	By MS/MS	19.8	19.8	79766000	42349000	37418000	38366000	39517000	5	7	12				178	634;1389;2065;2186;4101;4614;5068	True;True;True;True;True;True;True	654;1425;2110;2236;4234;4765;5233	1363;1364;2959;2960;4339;4340;4587;4588;8954;8955;10030;10031;10943;10944	1283;1284;2786;2787;4119;4120;4348;4349;8518;8519;9520;10393;10394	1283;2787;4119;4348;8519;9520;10393
SPAC222.14c|sey1|I|GTP	SPAC222.14c|sey1|I|GTP	1	1	1	>SPAC222.14c|sey1|I|GTP binding protein Sey1 (predicted)	1	1	1	1	1	0	1	0	1	0	1	1	1	87.509	762	762	0.0095541	0.9518	By MS/MS	By matching	1	0	2099400	2099400	0	2099400	0	1	0	1				179	5109	TRUE	5275	11031	10479	10479
SPAC227.07c|pab1|I|protein	SPAC227.07c|pab1|I|protein	5	5	5	>SPAC227.07c|pab1|I|protein phosphatase PP2A regulatory subunit B-55 Pab1	1	5	5	5	2	5	2	5	2	5	16.8	16.8	16.8	52.795	463	463	0	16.407	By MS/MS	By MS/MS	5.6	16.8	26190000	3071100	23119000	8255600	16771000	1	8	9				180	172;1207;3225;3949;5058	True;True;True;True;True	180;1240;3306;4081;5223	461;2497;6697;6698;8641;8642;10925	425;426;2361;2362;2363;6367;8215;8216;10376	425;2361;6367;8216;10376
SPAC227.18|lys3|I|saccharopine	SPAC227.18|lys3|I|saccharopine	9	9	9	>SPAC227.18|lys3|I|saccharopine dehydrogenase Lys3	1	9	9	9	8	8	8	8	8	8	30.4	30.4	30.4	41.392	368	368	0	10.964	By MS/MS	By MS/MS	28.3	27.2	170510000	79396000	91109000	74772000	91150000	7	7	14				181	776;1065;1726;1890;2062;2176;2700;3664;4680	True;True;True;True;True;True;True;True;True	803;1096;1768;1933;2107;2225;2774;3783;4833	1652;1653;2223;2224;3672;3673;3674;4013;4014;4333;4334;4567;4568;5649;5650;7957;10168	1562;2097;3473;3474;3475;3476;3803;3804;4114;4115;4330;4331;5369;7577;9647	1562;2097;3475;3804;4114;4330;5369;7577;9647
SPAC5D6.01|rps2202|I|40S;SPAC22A12.04c|rps2201|I|40S	SPAC5D6.01|rps2202|I|40S;SPAC22A12.04c|rps2201|I|40S	4;4	4;4	4;4	>SPAC5D6.01|rps2202|I|40S ribosomal protein S15a (predicted);>SPAC22A12.04c|rps2201|I|40S ribosomal protein S15a (predicted)	2	4	4	4	4	4	4	4	4	4	36.9	36.9	36.9	14.76	130	130;130	0	11.909	By MS/MS	By MS/MS	36.9	36.9	142620000	69599000	73026000	68798000	70153000	4	3	7				182	1303;1804;3770;3794	True;True;True;True	1338;1847;3894;3919	2714;2715;3838;3839;8204;8205;8330;8331	2565;2566;3639;3640;7820;7935;7936	2566;3639;7820;7935
SPAC22A12.06c|fsh2|I|serine	SPAC22A12.06c|fsh2|I|serine	4	4	4	>SPAC22A12.06c|fsh2|I|serine hydrolase-like	1	4	4	4	4	4	4	4	4	4	11	11	11	48.231	429	429	0	12.323	By MS/MS	By MS/MS	11	11	25448000	15340000	10108000	12913000	12026000	4	3	7				183	1445;1827;2607;5374	True;True;True;True	1481;1870;2677;5546	3055;3056;3885;3886;5460;5461;11657;11658	2879;2880;3683;3684;5190;5191;11105	2880;3684;5190;11105
SPAC22A12.07c|ogm1|I|protein	SPAC22A12.07c|ogm1|I|protein	13	13	13	>SPAC22A12.07c|ogm1|I|protein O-mannosyltransferase Ogm1	1	13	13	13	13	11	13	11	13	11	20.2	20.2	20.2	101.33	893	893	0	46.53	By MS/MS	By MS/MS	20.2	16.1	236200000	120270000	115930000	122410000	107950000	12	12	24				184	22;23;417;1369;1761;2455;2762;2859;3214;3441;4265;4332;5438	True;True;True;True;True;True;True;True;True;True;True;True;True	23;24;430;1405;1804;2517;2836;2934;3294;3552;4401;4469;5611	41;42;43;44;45;908;909;2840;2841;3753;3754;5151;5152;5775;5964;5965;6672;6673;7475;7476;9266;9267;9396;11797;11798	39;40;41;42;43;850;851;2685;3550;3551;3552;4888;4889;4890;5487;5670;5671;6342;7110;7111;8800;8801;8928;11228;11229	40;42;850;2685;3550;4888;5487;5670;6342;7111;8800;8928;11229
SPAC22A12.10|ept1|I|diacylglycerol	SPAC22A12.10|ept1|I|diacylglycerol	2	2	2	>SPAC22A12.10|ept1|I|diacylglycerol cholinephosphotransferase/ diacylglycerol ethanolaminesphotransferase Ept1 (predicted)	1	2	2	2	1	1	1	1	1	1	6	6	6	44.083	386	386	0	6.912	By MS/MS	By MS/MS	3.1	2.8	9410800	0	9410800	0	8937300	1	1	2				185	2735;5385	True;True	2809;5558	5726;11683	5440;11129	5440;11129
SPAC22A12.15c|bip1|I|ER	SPAC22A12.15c|bip1|I|ER	16	15	15	>SPAC22A12.15c|bip1|I|ER heat shock protein BiP	1	16	15	15	15	16	14	15	14	15	23.8	22.2	22.2	73.226	663	663	0	59.13	By MS/MS	By MS/MS	23.7	23.8	383700000	201690000	182000000	174750000	199790000	14	14	28				186	546;2306;2307;2342;2343;2472;2578;3494;3539;3701;3956;4486;4740;4840;4986;4987	True;True;True;True;True;True;True;True;True;True;True;True;False;True;True;True	562;2361;2362;2398;2399;2535;2648;3607;3655;3823;4088;4630;4897;5000;5149;5150	1180;1181;4842;4843;4844;4845;4913;4914;4915;4916;5184;5185;5417;5418;7575;7576;7675;7676;8047;8048;8655;8656;9750;9751;10320;10321;10526;10527;10793;10794;10795	1109;1110;4592;4593;4594;4662;4663;4664;4665;4666;4921;5146;5147;7210;7211;7306;7307;7661;8229;8230;9258;9259;9260;9788;9789;9985;9986;10254;10255;10256	1109;4592;4594;4663;4665;4921;5147;7211;7306;7661;8230;9260;9789;9986;10254;10256
SPAC22A12.16|acl2|I|ATP-citrate	SPAC22A12.16|acl2|I|ATP-citrate	7	7	7	>SPAC22A12.16|acl2|I|ATP-citrate synthase subunit 2 (predicted)	1	7	7	7	6	6	6	6	6	6	17.5	17.5	17.5	53.942	492	492	0	11.161	By MS/MS	By MS/MS	14.8	15.4	68350000	28571000	39780000	31871000	34478000	4	3	7				187	161;470;2439;2919;4617;4623;4746	True;True;True;True;True;True;True	169;484;2500;2997;4768;4774;4903	441;1016;1017;5115;5116;6079;10035;10036;10047;10048;10328;10329	408;953;954;4857;5783;9525;9526;9536;9796	408;954;4857;5783;9526;9536;9796
SPAC22E12.17c|glo3|I|ARF	SPAC22E12.17c|glo3|I|ARF	1	1	1	>SPAC22E12.17c|glo3|I|ARF GTPase activating protein (predicted)	1	1	1	1	0	1	0	1	0	1	2.9	2.9	2.9	52.583	483	483	0	2.5231	By matching	By MS/MS	0	2.9	7609500	0	7609500	0	7226700	0	1	1				188	626	TRUE	646	1352	1273	1273
SPAC22F3.06c|lon1|I|Lon	SPAC22F3.06c|lon1|I|Lon	5	5	5	>SPAC22F3.06c|lon1|I|Lon protease homolog Lon1 (predicted)	1	5	5	5	5	3	5	3	5	3	6	6	6	118.64	1067	1067	0	8.7212	By MS/MS	By MS/MS	6	4	25189000	13616000	11574000	15985000	8622200	3	2	5				189	628;2512;3385;5020;5326	True;True;True;True;True	648;2578;3496;5185;5497	1354;5270;5271;7360;7361;10858;10859;11562	1275;5001;5002;7000;10310;10311;11008	1275;5001;7000;10310;11008
SPAC22F3.12c|rgs1|I|regulator	SPAC22F3.12c|rgs1|I|regulator	1	1	1	>SPAC22F3.12c|rgs1|I|regulator of G-protein signaling Rgs1	1	1	1	1	1	1	1	1	1	1	2.3	2.3	2.3	54.362	481	481	0	2.0979	By MS/MS	By matching	2.3	2.3	7430000	4772900	2657100	0	2523400	1	0	1				190	2875	TRUE	2950	5995;5996	5702	5702
SPAC22F3.13|tsc1|I|hamartin	SPAC22F3.13|tsc1|I|hamartin	4	4	4	>SPAC22F3.13|tsc1|I|hamartin	1	4	4	4	4	2	4	2	4	2	4.9	4.9	4.9	103.43	899	899	0	8.2928	By MS/MS	By MS/MS	4.9	2.4	27832000	20397000	7435800	13931000	13528000	4	2	6				191	380;676;688;3131	True;True;True;True	391;697;709;3211	836;1445;1446;1467;1468;6499	790;1368;1369;1387;1388;6179	790;1369;1387;6179
SPAC22F8.05|SPAC22F8.05|I|alpha,alpha-trehalose-phosphate	SPAC22F8.05|SPAC22F8.05|I|alpha,alpha-trehalose-phosphate	2	2	2	>SPAC22F8.05|SPAC22F8.05|I|alpha,alpha-trehalose-phosphate synthase (predicted)	1	2	2	2	2	2	2	2	2	2	2.9	2.9	2.9	100.66	891	891	0	3.0388	By MS/MS	By MS/MS	2.9	2.9	8292500	3973100	4319400	3832600	4242600	1	2	3				192	1387;1730	True;True	1423;1772	2955;2956;3681;3682	2782;2783;3483	2782;3483
SPAC22F8.06|pam1|I|20S	SPAC22F8.06|pam1|I|20S	1	1	1	>SPAC22F8.06|pam1|I|20S proteasome complex subunit beta 6	1	1	1	1	0	1	0	1	0	1	4.4	4.4	4.4	25.082	225	225	0	1.9463	By matching	By MS/MS	0	4.4	415800	0	415800	0	394880	0	1	1				193	1994	TRUE	2039	4211	3995	3995
SPAC22F8.08|sec24|I|COPII	SPAC22F8.08|sec24|I|COPII	7	7	7	>SPAC22F8.08|sec24|I|COPII cargo receptor Sec24/Sfb2 subunit	1	7	7	7	6	6	6	6	6	6	9.8	9.8	9.8	101.9	926	926	0	30.261	By MS/MS	By MS/MS	8.6	8.7	82807000	40337000	42470000	40733000	39938000	7	7	14				194	209;566;1066;2867;3141;3413;3495	True;True;True;True;True;True;True	217;583;1097;2942;3221;3524;3608	530;531;1219;1220;1221;1222;2225;2226;5980;6518;7418;7419;7420;7421;7577;7578	496;497;1146;1147;1148;1149;2098;5686;6197;7053;7054;7055;7212;7213	497;1146;2098;5686;6197;7053;7213
SPAC22G7.04|pan2|I|ubiquitin	SPAC22G7.04|pan2|I|ubiquitin	1	1	1	>SPAC22G7.04|pan2|I|ubiquitin C-terminal hydrolase, poly(A)-specific ribonuclease complex subunit Pan2 (predicted)	1	1	1	1	1	1	1	1	1	1	0.8	0.8	0.8	123.87	1088	1088	0	1.6611	By MS/MS	By MS/MS	0.8	0.8	4603800	2890800	1713000	0	1626800	1	1	2				195	2212	TRUE	2264	4649;4650	4408;4409	4408
SPAC22G7.06c|ura1|I|carbamoyl-phosphate	SPAC22G7.06c|ura1|I|carbamoyl-phosphate	35	35	33	>SPAC22G7.06c|ura1|I|carbamoyl-phosphate synthase (glutamine hydrolyzing), aspartate carbamoyltransferase Ura1	1	35	35	33	29	31	29	31	28	30	18.9	18.9	18.1	248.31	2244	2244	0	89.289	By MS/MS	By MS/MS	15.8	16.8	545520000	261750000	283780000	244800000	286450000	26	29	55				196	82;188;342;430;582;657;826;851;940;1039;1116;1122;1412;1646;1705;1716;1767;1822;1992;2083;2419;2713;2812;3202;3677;3891;3918;3957;3997;4263;4388;4886;4970;5065;5111	True;True;True;True;True;True;True;True;True;True;True;True;True;True;True;True;True;True;True;True;True;True;True;True;True;True;True;True;True;True;True;True;True;True;True	89;196;353;443;601;678;855;880;969;1070;1148;1154;1448;1685;1747;1758;1810;1865;2037;2129;2477;2787;2886;3282;3798;4019;4048;4089;4399;4526;5048;5133;5230;5277	184;185;490;491;769;770;935;936;1260;1403;1743;1744;1790;1969;2174;2175;2319;2320;2331;2332;3000;3001;3513;3514;3631;3632;3651;3652;3762;3763;3875;3876;4208;4209;4373;4374;5063;5064;5680;5681;5872;5873;6649;6650;7988;8521;8577;8657;8658;9260;9261;9505;10612;10613;10760;10761;10937;10938;11033;11034	179;180;454;455;727;876;877;1187;1323;1649;1650;1694;1862;2054;2183;2184;2197;2198;2826;2827;3312;3313;3314;3429;3430;3450;3451;3561;3562;3674;3675;3992;3993;4150;4151;4807;5399;5400;5587;5588;6321;6322;7607;8105;8157;8231;8232;8795;8796;9033;10071;10072;10222;10386;10387;10388;10481	179;455;727;877;1187;1323;1649;1694;1862;2054;2183;2197;2826;3314;3430;3450;3561;3674;3993;4151;4807;5399;5587;6321;7607;8105;8157;8232;8795;9033;10072;10222;10387;10481
SPAC22G7.08|ppk8|I|serine/threonine	SPAC22G7.08|ppk8|I|serine/threonine	1	1	1	>SPAC22G7.08|ppk8|I|serine/threonine protein kinase Ppk8 (predicted)	1	1	1	1	1	0	1	0	1	0	2.3	2.3	2.3	58.546	513	513	0.0044444	1.2801	By MS/MS	By matching	2.3	0	1883300	1883300	0	1883300	0	1	0	1				197	4767	TRUE	4924	10374	9840	9840
SPAC22H12.02|tfg3|I|transcription	SPAC22H12.02|tfg3|I|transcription	2	2	2	>SPAC22H12.02|tfg3|I|transcription factor TFIIF complex subunit Tfg3	1	2	2	2	2	2	2	2	2	2	15.4	15.4	15.4	27.638	241	241	0	11.375	By MS/MS	By MS/MS	15.4	15.4	13727000	7657000	6070400	7585300	5836600	2	1	3				198	318;3126	True;True	329;3206	727;728;6487;6488	687;688;6170	687;6170
SPAC22H12.04c|rps102|I|40S	SPAC22H12.04c|rps102|I|40S	8	8	6	>SPAC22H12.04c|rps102|I|40S ribosomal protein S3a (predicted)	1	8	8	6	7	8	7	8	5	6	34.9	34.9	28.6	28.521	252	252	0	19.21	By MS/MS	By MS/MS	29.4	34.9	295170000	159040000	136130000	151050000	137280000	7	8	15				199	353;429;2135;2136;2777;2828;3905;4774	True;True;True;True;True;True;True;True	364;442;2184;2185;2851;2903;4033;4931	790;791;933;934;4493;4494;4495;4496;4497;5805;5806;5901;8548;8549;10388;10389	747;748;874;875;4262;4263;4264;4265;5519;5520;5617;8129;8130;9851;9852	747;874;4262;4265;5520;5617;8129;9851
SPAC23A1.03|apt1|I|adenine	SPAC23A1.03|apt1|I|adenine	1	1	1	>SPAC23A1.03|apt1|I|adenine phosphoribosyltransferase (APRT) (predicted)	1	1	1	1	1	1	1	1	1	1	5.9	5.9	5.9	20.746	188	188	0	1.8398	By MS/MS	By MS/MS	5.9	5.9	5489300	2452800	3036500	0	2883700	1	1	2				200	1496	TRUE	1532	3164;3165	2977;2978	2978
SPAC23A1.06c|cmk2|I|MAPK-activated	SPAC23A1.06c|cmk2|I|MAPK-activated	1	1	1	>SPAC23A1.06c|cmk2|I|MAPK-activated protein kinase Cmk2	1	1	1	1	0	1	0	1	0	1	2.4	2.4	2.4	56.609	504	504	0	2.8522	By matching	By MS/MS	0	2.4	1498700	0	1498700	0	1423300	0	1	1				201	682	TRUE	703	1457	1379	1379
SPCC1322.15|rpl3402|III|60S;SPAC23A1.08c|rpl3401|I|60S	SPCC1322.15|rpl3402|III|60S;SPAC23A1.08c|rpl3401|I|60S	2;2	2;2	2;2	>SPCC1322.15|rpl3402|III|60S ribosomal protein L34;>SPAC23A1.08c|rpl3401|I|60S ribosomal protein L34	2	2	2	2	2	2	2	2	2	2	22.5	22.5	22.5	12.8	111	111;112	0	9.3573	By MS/MS	By MS/MS	22.5	22.5	42675000	18323000	24352000	0	23127000	1	0	1				202	117;510	True;True	124;525	366;367;1097;1098	339;1025;1026	339;1026
SPCC794.09c|tef101|III|translation;SPBC839.15c|tef103|II|translation;SPAC23A1.10|tef102|I|translation	SPCC794.09c|tef101|III|translation;SPBC839.15c|tef103|II|translation;SPAC23A1.10|tef102|I|translation	23;23;23	23;23;23	23;23;23	>SPCC794.09c|tef101|III|translation elongation factor EF-1 alpha Ef1a-a;>SPBC839.15c|tef103|II|translation elongation factor EF-1 alpha Ef1a-c;>SPAC23A1.10|tef102|I|translation elongation factor EF-1 alpha Ef1a-b	3	23	23	23	23	21	23	21	23	21	57.4	57.4	57.4	49.66	460	460;460;460	0	141.05	By MS/MS	By MS/MS	57.4	50.4	7721100000	4054700000	3666400000	3740900000	3659800000	34	33	67				203	908;1084;1144;1185;1526;1567;2061;2978;3230;3293;3716;3785;3967;4264;4276;4490;4491;4620;4749;5208;5209;5360;5361	True;True;True;True;True;True;True;True;True;True;True;True;True;True;True;True;True;True;True;True;True;True;True	937;1116;1176;1217;1562;1604;2106;3057;3316;3317;3399;3400;3401;3838;3910;4099;4400;4412;4413;4634;4635;4771;4906;5376;5377;5532;5533	1904;1905;1906;1907;2260;2261;2371;2372;2373;2374;2452;2453;3227;3228;3229;3230;3231;3355;3356;4331;4332;6197;6198;6785;6786;6787;6788;6966;6967;6968;6969;6970;8077;8078;8231;8232;8675;8676;9262;9263;9264;9265;9286;9287;9288;9759;9760;9761;9762;9763;9764;10043;10332;10333;10334;10335;11213;11214;11215;11629;11630;11631;11632;11633;11634;11635;11636	1805;1806;1807;1808;2129;2130;2238;2239;2240;2317;2318;3039;3040;3041;3042;3156;3157;3158;4112;4113;5892;5893;6446;6447;6448;6449;6627;6628;6629;6630;6631;6632;7688;7689;7843;7844;8247;8248;8797;8798;8799;8819;8820;8821;9267;9268;9269;9270;9271;9272;9273;9274;9532;9800;9801;9802;9803;10660;10661;10662;11077;11078;11079;11080;11081;11082;11083;11084;11085	1805;2130;2238;2318;3041;3157;4112;5893;6446;6627;7688;7844;8248;8799;8819;9269;9274;9532;9802;10660;10662;11077;11083	52;53;54;55	155;292;402;408
SPBC839.13c|rpl1601|II|60S;SPAC23A1.11|rpl1602|I|60S	SPBC839.13c|rpl1601|II|60S;SPAC23A1.11|rpl1602|I|60S	2;2	2;2	2;2	>SPBC839.13c|rpl1601|II|60S ribosomal protein L13/L16 (predicted);>SPAC23A1.11|rpl1602|I|60S ribosomal protein L13/L16 (predicted)	2	2	2	2	2	1	2	1	2	1	14.2	14.2	14.2	22.17	197	197;197	0	4.2365	By MS/MS	By MS/MS	14.2	4.1	28404000	11008000	17396000	0	16521000	2	1	3				204	1644;5100	True;True	1683;5266	3510;11013;11014	3310;10461;10462	3310;10462
SPAC23A1.12c|frs1|I|cytoplasmic	SPAC23A1.12c|frs1|I|cytoplasmic	1	1	1	>SPAC23A1.12c|frs1|I|cytoplasmic phenylalanine-tRNA ligase beta subunit Frs1 (predicted)	1	1	1	1	1	1	1	1	1	1	1.7	1.7	1.7	66.849	589	589	0	3.1254	By matching	By MS/MS	1.7	1.7	4259600	2227900	2031700	0	1929500	0	1	1				205	4496	TRUE	4640	9771;9772	9279	9279
SPAC23A1.14c|SPAC23A1.14c|I|uncharacterised	SPAC23A1.14c|SPAC23A1.14c|I|uncharacterised	3	3	3	>SPAC23A1.14c|SPAC23A1.14c|I|uncharacterised trans-sulfuration enzyme (predicted)	1	3	3	3	3	2	3	2	3	2	14.6	14.6	14.6	43.284	398	398	0	4.3428	By MS/MS	By MS/MS	14.6	6.3	16760000	13237000	3523600	13237000	0	3	2	5				206	71;1883;2517	True;True;True	77;1926;2584	159;4001;4002;5285;5286	152;3791;3792;5017;5018	152;3792;5017
SPAC23A1.17|bbc1|I|WIP	SPAC23A1.17|bbc1|I|WIP	7	7	7	>SPAC23A1.17|bbc1|I|WIP family cytoskeletal protein Bbc1 (predicted)	1	7	7	7	6	5	6	5	6	5	8.1	8.1	8.1	170.53	1611	1611	0	26.437	By MS/MS	By MS/MS	7	6.1	92652000	66241000	26412000	54540000	36783000	6	5	11				207	369;2263;2463;3556;3578;3776;4234	True;True;True;True;True;True;True	380;2318;2525;3672;3697;3900;4369	818;819;4766;5165;7710;7711;7784;7785;8213;9201;9202	772;773;4522;4903;7338;7339;7411;7412;7827;8741;8742	772;4522;4903;7338;7412;7827;8742
SPBP4H10.13|rps2302|II|40S;SPAC23C11.02c|rps23|I|40S	SPBP4H10.13|rps2302|II|40S;SPAC23C11.02c|rps23|I|40S	2;2	2;2	2;2	>SPBP4H10.13|rps2302|II|40S ribosomal protein S23 (predicted);>SPAC23C11.02c|rps23|I|40S ribosomal protein S23 (predicted)	2	2	2	2	0	2	0	2	0	2	28.7	28.7	28.7	15.655	143	143;143	0.0085379	1.015	By matching	By MS/MS	0	28.7	10055000	0	10055000	0	9549500	0	1	1				208	2491;4669	True;True	2556;4821	5228;10141	4960;9621	4960;9621
SPAC23C11.05|ipp1|I|inorganic	SPAC23C11.05|ipp1|I|inorganic	5	5	5	>SPAC23C11.05|ipp1|I|inorganic pyrophosphatase Ipp1 (predicted)	1	5	5	5	4	4	4	4	4	4	22.8	22.8	22.8	32.467	289	289	0	8.3864	By MS/MS	By MS/MS	20.4	17.3	53638000	26229000	27409000	30103000	22156000	4	3	7				209	1859;3358;4448;4854;4887	True;True;True;True;True	1902;3469;4590;5015;5049	3947;7295;7296;9666;9667;10556;10557;10614	3743;6938;6939;9173;9174;10016;10073	3743;6938;9173;10016;10073
SPAC23C11.09|ala1|I|mitochondrial	SPAC23C11.09|ala1|I|mitochondrial	3	3	3	>SPAC23C11.09|ala1|I|mitochondrial and cytoplasmic alanine-tRNA ligase Ala1 (predicted)	1	3	3	3	2	3	2	3	2	3	3.3	3.3	3.3	107.38	959	959	0	4.0856	By MS/MS	By MS/MS	2.2	3.3	10522000	2856500	7665500	4578600	5557800	2	2	4				210	1231;2229;3175	True;True;True	1265;2281;3255	2554;4683;4684;6598;6599	2415;4439;4440;6274	2415;4439;6274
SPAC23C11.11|cka1|I|serine/threonine	SPAC23C11.11|cka1|I|serine/threonine	6	6	6	>SPAC23C11.11|cka1|I|serine/threonine protein kinase Cka1	1	6	6	6	5	3	5	3	5	3	22.3	22.3	22.3	39.527	332	332	0	11.349	By MS/MS	By MS/MS	19.9	10.5	30816000	26658000	4157800	26658000	0	5	3	8				211	2166;4063;4519;5377;5387;5440	True;True;True;True;True;True	2215;4196;4665;5549;5560;5613	4551;8883;9830;9831;11663;11685;11686;11803	4315;8449;9333;9334;11109;11131;11132;11236	4315;8449;9333;11109;11131;11236
SPAC23C11.14|zhf1|I|zinc	SPAC23C11.14|zhf1|I|zinc	3	3	3	>SPAC23C11.14|zhf1|I|zinc ion transmembrane transporter Zhf1	1	3	3	3	3	3	3	3	3	3	11.1	11.1	11.1	42.941	387	387	0	5.3054	By MS/MS	By MS/MS	11.1	11.1	69181000	34146000	35036000	35836000	31582000	3	3	6				212	2582;5401;5409	True;True;True	2652;5574;5582	5423;5424;11727;11728;11743;11744	5152;5153;11165;11166;11177;11178	5153;11166;11178
SPAC23C11.15|pst2|I|Clr6	SPAC23C11.15|pst2|I|Clr6	1	1	1	>SPAC23C11.15|pst2|I|Clr6 histone deacetylase complex subunit Pst2	1	1	1	1	1	0	1	0	1	0	1.4	1.4	1.4	124.85	1075	1075	0	2.6793	By MS/MS	By matching	1.4	0	2276100	2276100	0	2276100	0	1	0	1				213	1422	TRUE	1458	3016	2841	2841
SPAC23C11.16|plo1|I|Polo	SPAC23C11.16|plo1|I|Polo	17	17	17	>SPAC23C11.16|plo1|I|Polo kinase Plo1	1	17	17	17	17	15	17	15	17	15	31.6	31.6	31.6	77.301	683	683	0	115.4	By MS/MS	By MS/MS	31.6	28	425330000	243540000	181790000	248720000	162100000	20	18	38				214	350;418;478;762;2052;2163;2716;3065;3417;3524;3738;3898;3913;4369;4743;4860;5219	True;True;True;True;True;True;True;True;True;True;True;True;True;True;True;True;True	361;431;493;787;2097;2212;2790;3145;3528;3639;3640;3862;4026;4041;4507;4900;5021;5388	785;786;910;1037;1038;1620;1621;1622;1623;4316;4317;4546;4547;5686;5687;6368;6369;7428;7429;7430;7431;7646;7647;7648;8138;8139;8534;8535;8536;8537;8566;8567;9468;9469;10325;10568;10569;11241;11242	741;742;743;852;973;1534;1535;1536;4096;4097;4098;4310;4311;5404;5405;6056;6057;7062;7063;7064;7279;7280;7281;7754;7755;8116;8117;8118;8119;8146;8147;8998;8999;9000;9793;10027;10028;10688;10689	743;852;973;1534;4096;4311;5404;6057;7062;7281;7755;8116;8146;8999;9793;10027;10688	56;57	597;600
SPAC23C4.05c|SPAC23C4.05c|I|LEA	SPAC23C4.05c|SPAC23C4.05c|I|LEA	2	2	2	>SPAC23C4.05c|SPAC23C4.05c|I|LEA domain protein	1	2	2	2	1	1	1	1	1	1	4.9	4.9	4.9	49.532	431	431	0.0022523	1.391	By MS/MS	By MS/MS	2.3	2.6	1470400	0	1470400	0	1396400	1	0	1				215	928;5032	True;True	957;5197	1946;10885	1845;10338	1845;10338
SPAC23C4.12|hhp2|I|serine/threonine	SPAC23C4.12|hhp2|I|serine/threonine	9	9	8	>SPAC23C4.12|hhp2|I|serine/threonine protein kinase Hhp2	1	9	9	8	9	9	9	9	8	8	27.2	27.2	24.2	45.831	400	400	0	32.547	By MS/MS	By MS/MS	27.2	27.2	572900000	297920000	274990000	284930000	267610000	7	11	18				216	646;1622;1668;1808;2074;3734;4172;4438;4619	True;True;True;True;True;True;True;True;True	666;667;1660;1709;1851;2119;3858;4305;4580;4770	1385;1386;1387;3461;3462;3557;3558;3847;3848;4354;4355;8132;8133;9091;9092;9632;9633;10041;10042	1305;1306;1307;1308;3262;3263;3356;3357;3647;4133;4134;7748;7749;8640;8641;9142;9530;9531	1306;3262;3357;3647;4134;7748;8640;9142;9531	58	139
SPAC23C4.15|rpb5|I|DNA-directed	SPAC23C4.15|rpb5|I|DNA-directed	2	2	2	>SPAC23C4.15|rpb5|I|DNA-directed RNA polymerase I, II and III subunit Rpb5	1	2	2	2	2	2	2	2	2	2	10.5	10.5	10.5	23.915	210	210	0	3.9631	By MS/MS	By MS/MS	10.5	10.5	2572400	1062700	1509700	1063400	1433000	2	3	5				217	1823;4411	True;True	1866;4552	3877;3878;9567;9568	3676;3677;9087;9088;9089	3677;9089
SPAC23D3.04c|gpd2|I|glycerol-3-phosphate	SPAC23D3.04c|gpd2|I|glycerol-3-phosphate	4	4	4	>SPAC23D3.04c|gpd2|I|glycerol-3-phosphate dehydrogenase Gpd2	1	4	4	4	4	4	4	4	4	4	13.7	13.7	13.7	40.874	373	373	0	8.8937	By MS/MS	By MS/MS	13.7	13.7	44943000	19866000	25078000	23636000	20046000	4	4	8				218	1118;2067;3396;5011	True;True;True;True	1150;2112;3507;5174	2322;2323;4342;4343;7380;7381;7382;7383;10840;10841	2186;2187;2188;4122;4123;7018;7019;7020;10296;10297	2186;4122;7018;10296
SPAC23D3.06c|nup146|I|nucleoporin	SPAC23D3.06c|nup146|I|nucleoporin	15	15	15	>SPAC23D3.06c|nup146|I|nucleoporin Nup146	1	15	15	15	15	3	15	3	15	3	15.2	15.2	15.2	145.78	1325	1325	0	35.399	By MS/MS	By matching	15.2	3.2	207440000	197390000	10047000	197390000	9541200	17	0	17				219	404;458;700;1340;1907;1959;2584;2638;3424;3450;3506;3685;4083;4109;4132	True;True;True;True;True;True;True;True;True;True;True;True;True;True;True	416;472;722;1376;1950;2003;2654;2708;3535;3561;3621;3806;4216;4242;4265	879;992;993;994;1490;2786;4040;4141;4142;5426;5511;7441;7491;7609;8010;8920;8968;8969;9012	827;927;928;1409;2630;3834;3929;5155;5240;7075;7076;7125;7245;7625;8485;8531;8567	827;928;1409;2630;3834;3929;5155;5240;7076;7125;7245;7625;8485;8531;8567
SPAC23G3.01|rpb2|I|RNA	SPAC23G3.01|rpb2|I|RNA	16	16	16	>SPAC23G3.01|rpb2|I|RNA polymerase II complex subunit Rpb2	1	16	16	16	15	13	15	13	15	13	15.9	15.9	15.9	137.85	1210	1210	0	38.205	By MS/MS	By MS/MS	15.1	12.2	140220000	83600000	56624000	75164000	62211000	13	10	23				220	439;1641;1855;2597;2648;3125;3453;3868;3912;4239;4775;4802;5008;5012;5391;5402	True;True;True;True;True;True;True;True;True;True;True;True;True;True;True;True	452;1680;1898;2667;2720;3205;3564;3996;4040;4374;4932;4961;5171;5175;5564;5575	953;954;3504;3505;3940;3941;5445;5446;5551;6485;6486;7496;7497;8481;8482;8564;8565;9212;9213;10390;10391;10447;10835;10842;10843;11695;11696;11729	893;894;3303;3304;3305;3737;5174;5280;6168;6169;7130;8069;8070;8144;8145;8752;9853;9909;10292;10298;11138;11139;11167	893;3305;3737;5174;5280;6169;7130;8070;8144;8752;9853;9909;10292;10298;11139;11167
SPAC23G3.02c|sib1|I|ferrichrome	SPAC23G3.02c|sib1|I|ferrichrome	3	3	3	>SPAC23G3.02c|sib1|I|ferrichrome synthetase Sib1	1	3	3	3	1	3	1	3	1	3	1	1	1	559.84	4924	4924	0	9.9695	By MS/MS	By MS/MS	0.4	1	11281000	4500800	6779900	0	6438800	2	3	5				221	785;4074;4493	True;True;True	812;4207;4637	1668;1669;8906;9767	1575;1576;1577;8472;9276	1575;8472;9276
SPAC23G3.03|sib2|I|ornithine	SPAC23G3.03|sib2|I|ornithine	5	5	5	>SPAC23G3.03|sib2|I|ornithine N5 monooxygenase (predicted)	1	5	5	5	4	5	4	5	4	5	20.6	20.6	20.6	48.582	431	431	0	16.23	By MS/MS	By MS/MS	18.8	20.6	88951000	39481000	49471000	38880000	47582000	5	6	11				222	739;965;3381;3415;4554	True;True;True;True;True	763;995;3492;3526;4700	1574;1575;1576;1577;2025;2026;2027;7353;7354;7424;7425;9898	1486;1487;1488;1489;1910;1911;1912;6993;6994;7058;7059;9394	1488;1911;6993;7058;9394
SPAC23G3.06|nop58|I|U3	SPAC23G3.06|nop58|I|U3	7	7	7	>SPAC23G3.06|nop58|I|U3 snoRNP protein Nop58 (predicted)	1	7	7	7	7	6	7	6	7	6	19.5	19.5	19.5	55.758	508	508	0	14.792	By MS/MS	By MS/MS	19.5	17.9	108590000	60923000	47665000	54311000	51878000	6	5	11				223	383;554;2112;2868;3070;3276;4706	True;True;True;True;True;True;True	394;570;2159;2943;3150;3379;4861	840;1193;1194;4437;4438;5981;5982;6378;6379;6927;6928;10255;10256	794;1122;4214;4215;5687;5688;5689;6066;6067;6584;9730	794;1122;4214;5688;6066;6584;9730
SPAC23G3.08c|ubp7|I|ubiquitin	SPAC23G3.08c|ubp7|I|ubiquitin	1	1	1	>SPAC23G3.08c|ubp7|I|ubiquitin C-terminal hydrolase Ubp7	1	1	1	1	1	1	1	1	1	1	1.4	1.4	1.4	98.376	875	875	0	1.8945	By MS/MS	By MS/MS	1.4	1.4	0	0	0	0	0	1	1	2				224	2848	TRUE	2923	5942;5943	5650;5651	5650
SPAC23G3.10c|ssr3|I|SWI/SNF	SPAC23G3.10c|ssr3|I|SWI/SNF	2	2	2	>SPAC23G3.10c|ssr3|I|SWI/SNF and RSC complex subunit Ssr3	1	2	2	2	2	2	2	2	2	2	4.2	4.2	4.2	49.759	425	425	0	3.8339	By MS/MS	By MS/MS	4.2	4.2	7459600	5247600	2212000	5247600	0	2	2	4				225	102;1174	True;True	109;1206	340;341;2431;2432	315;316;2295;2296	315;2296
SPAC23G3.11|rpn6|I|19S	SPAC23G3.11|rpn6|I|19S	3	3	3	>SPAC23G3.11|rpn6|I|19S proteasome regulatory subunit Rpn6 (predicted)	1	3	3	3	2	2	2	2	2	2	10.7	10.7	10.7	47.341	421	421	0	7.4249	By MS/MS	By MS/MS	6.9	6.7	12915000	10862000	2053600	10862000	0	1	2	3				226	311;3260;4001	True;True;True	322;3358;4134	717;6873;6874;8743	678;6525;8315	678;6525;8315
SPAC23H3.09c|gly1|I|threonine	SPAC23H3.09c|gly1|I|threonine	2	2	2	>SPAC23H3.09c|gly1|I|threonine aldolase Gly1 (predicted)	1	2	2	2	1	2	1	2	1	2	6.4	6.4	6.4	41.318	376	376	0	4.5985	By MS/MS	By MS/MS	4	6.4	3630000	1332600	2297400	0	2181800	1	3	4				227	3980;4000	True;True	4113;4133	8701;8741;8742	8272;8312;8313;8314	8272;8314
SPAC23H3.13c|gpa2|I|heterotrimeric	SPAC23H3.13c|gpa2|I|heterotrimeric	1	1	1	>SPAC23H3.13c|gpa2|I|heterotrimeric G protein alpha-2 subunit Gpa2	1	1	1	1	0	1	0	1	0	1	3.1	3.1	3.1	40.522	354	354	0.0095745	0.96832	By matching	By MS/MS	0	3.1	2210400	0	2210400	0	2099100	0	1	1				228	4891	TRUE	5053	10623	10082	10082
SPAC23H4.01c|osh3|I|sterol	SPAC23H4.01c|osh3|I|sterol	4	4	4	>SPAC23H4.01c|osh3|I|sterol binding ankyrin repeat protein Osh3	1	4	4	4	4	4	4	4	4	4	5.6	5.6	5.6	106.81	945	945	0	6.7007	By MS/MS	By MS/MS	5.6	5.6	32337000	16349000	15988000	15691000	15842000	4	2	6				229	3926;4275;4625;4698	True;True;True;True	4057;4411;4776;4851	8593;8594;9284;9285;10051;10052;10236;10237	8172;8817;8818;9539;9540;9711	8172;8818;9540;9711
SPAC23H4.06|gln1|I|glutamate-ammonia	SPAC23H4.06|gln1|I|glutamate-ammonia	4	4	4	>SPAC23H4.06|gln1|I|glutamate-ammonia ligase Gln1	1	4	4	4	2	4	2	4	2	4	13.9	13.9	13.9	40.018	359	359	0	7.509	By MS/MS	By MS/MS	7.5	13.9	31036000	6773000	24263000	0	23043000	1	6	7				230	1778;1928;4192;4921	True;True;True;True	1821;1972;4327;5084	3787;3788;4083;9127;9128;10682	3585;3586;3587;3872;8674;10142;10143	3586;3872;8674;10142	59	29
SPAC23H4.10c|thi4|I|bifunctional	SPAC23H4.10c|thi4|I|bifunctional	11	11	11	>SPAC23H4.10c|thi4|I|bifunctional thiamine-phosphate dipyrophosphorylase/hydroxyethylthiazole kinase	1	11	11	11	11	11	11	11	11	11	27.2	27.2	27.2	55.565	518	518	0	53.688	By MS/MS	By MS/MS	27.2	27.2	229560000	102890000	126660000	85510000	137680000	11	13	24				231	0;591;692;1702;1982;2755;2793;3429;3614;3790;5228	True;True;True;True;True;True;True;True;True;True;True	0;610;714;1744;2027;2829;2867;3540;3733;3915;5397	0;1;1274;1275;1477;1478;3625;3626;3627;4188;4189;4190;4191;5763;5764;5834;5835;7450;7451;7867;7868;8241;8242;11359;11360	0;1;1200;1396;1397;3423;3424;3425;3972;3973;3974;3975;3976;5475;5476;5477;5548;7086;7087;7492;7493;7851;7852;10818	1;1200;1396;3423;3975;5477;5548;7087;7493;7851;10818
SPAC24B11.06c|sty1|I|MAP	SPAC24B11.06c|sty1|I|MAP	4	3	3	>SPAC24B11.06c|sty1|I|MAP kinase Sty1	1	4	3	3	4	3	3	2	3	2	11.7	9.5	9.5	40.222	349	349	0	4.3001	By MS/MS	By MS/MS	11.7	7.2	20734000	18675000	2059100	18675000	0	3	2	5				232	356;685;1967;3264	True;True;False;True	367;706;2012;3363	795;796;1462;4160;4161;6881;6882	753;754;1383;3945;3946;6532;6533	753;1383;3946;6532
SPAC24B11.11c|sid2|I|NDR	SPAC24B11.11c|sid2|I|NDR	3	3	3	>SPAC24B11.11c|sid2|I|NDR kinase Sid2	1	3	3	3	1	3	1	3	1	3	5.8	5.8	5.8	70.491	607	607	0	3.9198	By MS/MS	By MS/MS	1.6	5.8	12069000	3953200	8115500	0	7707200	1	2	3				233	650;3000;4495	True;True;True	671;3079;4639	1394;6234;9769;9770	1314;5926;9278	1314;5926;9278
SPAC24C9.06c|aco1|I|aconitate	SPAC24C9.06c|aco1|I|aconitate	3	3	3	>SPAC24C9.06c|aco1|I|aconitate hydratase Aco1 (predicted)	1	3	3	3	3	1	3	1	3	1	6.2	6.2	6.2	86.112	789	789	0	15.962	By MS/MS	By MS/MS	6.2	2.3	40100000	32506000	7594600	32506000	0	3	1	4				234	1737;2178;5183	True;True;True	1779;2227;5351	3700;3701;4571;11167	3501;3502;4333;10615	3501;4333;10615
SPAC24C9.12c|shm1|I|serine	SPAC24C9.12c|shm1|I|serine	29	29	28	>SPAC24C9.12c|shm1|I|serine hydroxymethyltransferase Shm1 (predicted)	1	29	29	28	26	26	26	26	25	26	76	76	74.1	51.86	467	467	0	243.63	By MS/MS	By MS/MS	70.2	74.1	4650500000	1938000000	2712500000	2007300000	2252900000	32	37	69				235	242;319;474;1037;1089;1135;1246;1448;1495;1626;2174;2254;2425;2503;2693;2912;2913;3680;3873;4222;4223;4236;4695;4723;4800;4877;5075;5140;5386	True;True;True;True;True;True;True;True;True;True;True;True;True;True;True;True;True;True;True;True;True;True;True;True;True;True;True;True;True	251;330;488;489;1068;1121;1167;1281;1484;1531;1665;2223;2308;2483;2484;2568;2569;2767;2989;2990;2991;3801;4001;4357;4358;4371;4848;4879;4880;4958;4959;5039;5240;5307;5559	591;592;729;730;1026;1027;1028;1029;1030;1031;2172;2273;2358;2359;2607;3063;3064;3162;3163;3473;3474;4563;4564;4734;4735;4736;5072;5073;5074;5249;5250;5251;5252;5253;5633;5634;5635;5636;6065;6066;6067;6068;6069;6070;7998;7999;8489;8490;9182;9183;9184;9207;9208;10230;10231;10290;10291;10292;10293;10442;10443;10444;10599;10600;10956;10957;11095;11096;11684	553;554;689;690;963;964;965;966;967;2052;2141;2225;2226;2468;2887;2888;2976;3273;3274;4326;4327;4493;4494;4495;4815;4816;4817;4818;4982;4983;4984;4985;4986;5355;5356;5357;5358;5359;5767;5768;5769;5770;5771;5772;5773;5774;7615;8077;8078;8725;8726;8747;8748;8749;9705;9706;9761;9762;9763;9764;9904;9905;9906;10057;10058;10408;10409;10544;10545;10546;10547;11130	554;689;967;2052;2141;2225;2468;2887;2976;3273;4327;4495;4815;4983;5356;5772;5774;7615;8077;8725;8726;8747;9705;9762;9906;10058;10409;10546;11130	60;61;62;63;64;65;66	48;55;125;156;171;343;393
SPAC24H6.04|hxk1|I|hexokinase	SPAC24H6.04|hxk1|I|hexokinase	1	1	1	>SPAC24H6.04|hxk1|I|hexokinase 1	1	1	1	1	1	1	1	1	1	1	2.3	2.3	2.3	53.597	484	484	0	4.9052	By MS/MS	By MS/MS	2.3	2.3	10719000	4510900	6208200	0	5895800	1	2	3				236	3032	TRUE	3111	6298;6299	5989;5990;5991	5989
SPAC24H6.07|rps901|I|40S	SPAC24H6.07|rps901|I|40S	9	9	1	>SPAC24H6.07|rps901|I|40S ribosomal protein S9	1	9	9	1	7	8	7	8	1	1	38.7	38.7	4.2	22.161	191	191	0	24.158	By MS/MS	By MS/MS	29.8	38.7	346130000	118230000	227900000	164370000	170290000	9	10	19				237	987;988;1815;2005;2620;2653;2709;3251;3697	True;True;True;True;True;True;True;True;True	1018;1019;1858;2050;2690;2725;2783;3345;3346;3818	2067;2068;2069;3862;4231;4232;5483;5560;5561;5672;5673;6846;6847;6848;6849;8035;8036	1952;1953;1954;3661;3662;4013;4014;5213;5289;5290;5291;5391;5392;6502;6503;6504;6505;7648;7649	1952;1953;3662;4014;5213;5289;5392;6503;7648	67	91
SPAC24H6.13|SPAC24H6.13|I|DUF221	SPAC24H6.13|SPAC24H6.13|I|DUF221	1	1	1	>SPAC24H6.13|SPAC24H6.13|I|DUF221 family protein implicated in Golgi to plasma membrane transport (predicted)	1	1	1	1	0	1	0	1	0	1	1.3	1.3	1.3	98.441	871	871	0	1.6111	By matching	By MS/MS	0	1.3	0	0	0	0	0	0	1	1				238	1482	TRUE	1518	3138	2954	2954
SPAC25B8.04c|mss51|I|mitochondrial	SPAC25B8.04c|mss51|I|mitochondrial	1	1	1	>SPAC25B8.04c|mss51|I|mitochondrial splicing suppressor Mss51 (predicted)	1	1	1	1	0	1	0	1	0	1	4.2	4.2	4.2	43.599	378	378	0	8.1579	By matching	By MS/MS	0	4.2	4265500	0	4265500	0	4050900	0	0	0				239	2676	TRUE	2750	5603	5329	5329
SPAC25B8.12c|SPAC25B8.12c|I|unknown	SPAC25B8.12c|SPAC25B8.12c|I|unknown	3	3	3	>SPAC25B8.12c|SPAC25B8.12c|I|unknown HAD superfamily hydrolase	1	3	3	3	2	3	2	3	2	3	14.2	14.2	14.2	33.85	303	303	0	10.092	By MS/MS	By MS/MS	9.6	14.2	31144000	11023000	20120000	13456000	16675000	1	3	4				240	949;2042;3224	True;True;True	978;2087;3305	1992;1993;4297;4298;6696	1880;1881;4077;6366	1881;4077;6366
SPAC25G10.05c|his1|I|ATP	SPAC25G10.05c|his1|I|ATP	1	1	1	>SPAC25G10.05c|his1|I|ATP phosphoribosyltransferase	1	1	1	1	1	1	1	1	1	1	4.8	4.8	4.8	34.029	310	310	0	2.3142	By matching	By MS/MS	4.8	4.8	10908000	3098200	7809900	0	7417000	0	1	1				241	4811	TRUE	4970	10467;10468	9927	9927
SPCC285.15c|rps2802|III|40S;SPAC25G10.06|rps2801|I|40S	SPCC285.15c|rps2802|III|40S;SPAC25G10.06|rps2801|I|40S	1;1	1;1	1;1	>SPCC285.15c|rps2802|III|40S ribosomal protein S28, Rps2802;>SPAC25G10.06|rps2801|I|40S ribosomal protein S28 (predicted)	2	1	1	1	1	1	1	1	1	1	23.5	23.5	23.5	7.6638	68	68;68	0	4.0943	By MS/MS	By MS/MS	23.5	23.5	8837800	4581300	4256500	0	4042300	1	1	2				242	1642	TRUE	1681	3506;3507	3306;3307	3307
SPAC25G10.08|SPAC25G10.08|I|translation	SPAC25G10.08|SPAC25G10.08|I|translation	14	14	14	>SPAC25G10.08|SPAC25G10.08|I|translation initiation factor eIF3b (p84)	1	14	14	14	11	12	11	12	11	12	24.1	24.1	24.1	84.034	725	725	0	23.693	By MS/MS	By MS/MS	18.5	20.4	178270000	77603000	100660000	80162000	93039000	11	11	22				243	127;741;751;1150;1285;1405;2957;3376;3392;4308;4676;4857;5344;5422	True;True;True;True;True;True;True;True;True;True;True;True;True;True	135;765;775;1182;1320;1441;3036;3487;3503;4445;4829;5018;5515;5595	384;385;1580;1581;1602;2383;2384;2679;2987;6162;7344;7372;7373;9350;9351;10157;10158;10562;10563;11595;11596;11764;11765	354;355;1493;1494;1515;2249;2250;2531;2815;5860;6982;7012;8880;8881;9638;9639;10020;10021;11040;11041;11197;11198;11199	354;1493;1515;2250;2531;2815;5860;6982;7012;8881;9639;10020;11040;11199
SPAC3A12.10|rpl2001|I|60S;SPAC26A3.04|rpl2002|I|60S	SPAC3A12.10|rpl2001|I|60S;SPAC26A3.04|rpl2002|I|60S	5;5	5;5	5;5	>SPAC3A12.10|rpl2001|I|60S ribosomal protein L20a (predicted);>SPAC26A3.04|rpl2002|I|60S ribosomal protein L20 (predicted)	2	5	5	5	5	5	5	5	5	5	33	33	33	20.599	176	176;176	0	7.1468	By MS/MS	By MS/MS	33	33	86476000	38251000	48225000	40031000	44019000	6	4	10				244	428;2646;3719;4752;4781	True;True;True;True;True	441;2718;3842;4909;4938	931;932;5547;5548;8087;8088;10340;10341;10400;10401	873;5276;5277;5278;7698;7699;9806;9807;9861;9862	873;5278;7698;9807;9862
SPAC26A3.05|chc1|I|clathrin	SPAC26A3.05|chc1|I|clathrin	35	35	35	>SPAC26A3.05|chc1|I|clathrin heavy chain Chc1 (predicted)	1	35	35	35	32	26	32	26	32	26	32.4	32.4	32.4	190.02	1666	1666	0	168.37	By MS/MS	By MS/MS	28.4	24.7	919590000	543700000	375890000	530230000	361860000	34	35	69				245	46;150;237;300;303;379;384;730;1023;1360;1516;1926;1934;2106;2209;2339;2376;2509;2515;2544;2560;2780;2827;2856;3058;3730;3846;3847;4291;4535;4584;4853;4914;5090;5305	True;True;True;True;True;True;True;True;True;True;True;True;True;True;True;True;True;True;True;True;True;True;True;True;True;True;True;True;True;True;True;True;True;True;True	47;158;246;310;311;314;390;395;754;1054;1396;1552;1970;1978;2153;2261;2395;2432;2575;2581;2612;2629;2854;2901;2902;2931;3138;3854;3974;3975;4428;4681;4733;5014;5076;5256;5475	91;92;93;422;582;583;700;701;704;834;835;841;1555;1556;1557;1558;2144;2145;2821;2822;3208;4079;4080;4093;4094;4420;4641;4642;4907;4908;4909;4910;4978;4979;5264;5265;5275;5276;5349;5381;5382;5383;5384;5810;5811;5899;5900;5957;5958;5959;5960;6350;6351;8125;8126;8441;8442;8443;9311;9312;9860;9861;9964;10555;10667;10668;10991;11517;11518	89;90;91;92;391;543;544;660;661;664;788;789;795;1469;1470;1471;1472;2027;2665;2666;3021;3868;3869;3882;3883;4196;4402;4655;4656;4657;4658;4659;4727;4728;4997;5006;5007;5082;5112;5113;5114;5115;5523;5524;5525;5615;5616;5664;5665;5666;6039;6040;6041;7741;7742;8031;8032;8033;8843;8844;9362;9363;9455;10014;10015;10126;10127;10440;10971;10972	90;391;544;661;664;789;795;1470;2027;2666;3021;3869;3882;4196;4402;4659;4728;4997;5006;5082;5112;5524;5616;5666;6040;7741;8032;8033;8843;9362;9455;10015;10127;10440;10972	68;69;70	601;992;1412
SPBC17G9.10|rpl1102|II|60S;SPAC26A3.07c|rpl1101|I|60S	SPBC17G9.10|rpl1102|II|60S;SPAC26A3.07c|rpl1101|I|60S	2;2	2;2	2;2	>SPBC17G9.10|rpl1102|II|60S ribosomal protein L11 (predicted);>SPAC26A3.07c|rpl1101|I|60S ribosomal protein L11 (predicted)	2	2	2	2	2	2	2	2	2	2	14.4	14.4	14.4	19.891	174	174;174	0	44.449	By MS/MS	By MS/MS	14.4	14.4	110470000	56060000	54411000	52216000	55518000	3	2	5				246	2190;4878	True;True	2241;5040	4597;4598;10601;10602;10603	4358;4359;10059;10060;10061	4358;10061
SPAC26A3.09c|rga2|I|Rho-type	SPAC26A3.09c|rga2|I|Rho-type	1	1	1	>SPAC26A3.09c|rga2|I|Rho-type GTPase activating protein Rga2	1	1	1	1	1	1	1	1	1	1	0.6	0.6	0.6	143.59	1275	1275	0.0011364	1.4278	By MS/MS	By MS/MS	0.6	0.6	31557000	16440000	15117000	0	14357000	1	1	2				247	5296	TRUE	5466	11498;11499	10954;10955	10955
SPAC26A3.10|cnt6|I|centaurin	SPAC26A3.10|cnt6|I|centaurin	3	3	3	>SPAC26A3.10|cnt6|I|centaurin ADOP ribosylation factor GTPase activating protein family (predicted)	1	3	3	3	2	2	2	2	2	2	3.5	3.5	3.5	104.5	923	923	0	4.4272	By MS/MS	By MS/MS	2.5	2.3	14182000	8010800	6171400	0	5860900	2	2	4				248	4091;4136;5283	True;True;True	4224;4269;5453	8933;8934;9019;11474	8496;8497;8574;10930	8497;8574;10930
SPAC26A3.15c|nsp1|I|nucleoporin	SPAC26A3.15c|nsp1|I|nucleoporin	10	10	10	>SPAC26A3.15c|nsp1|I|nucleoporin Nsp1	1	10	10	10	10	9	10	9	10	9	25.3	25.3	25.3	60.73	598	598	0	45.702	By MS/MS	By MS/MS	25.3	22.9	338430000	234330000	104100000	215720000	117480000	10	8	18				249	112;443;1975;2045;2817;3527;4430;4516;4894;5169	True;True;True;True;True;True;True;True;True;True	119;456;2020;2090;2891;3643;4572;4662;5056;5336	356;357;960;961;4176;4177;4303;4304;5881;5882;7652;7653;9610;9611;9824;9825;10627;10628;10629;10630;11142	330;331;898;899;3960;3961;4082;4083;5596;5597;7285;9124;9328;9329;10086;10087;10088;10089;10090;10594	330;898;3961;4082;5596;7285;9124;9329;10087;10594
SPAC26A3.16|dph1|I|UBA	SPAC26A3.16|dph1|I|UBA	2	2	2	>SPAC26A3.16|dph1|I|UBA domain protein Dph1	1	2	2	2	2	0	2	0	2	0	8.2	8.2	8.2	36.819	354	354	0	2.5719	By MS/MS	By matching	8.2	0	3059400	3059400	0	3059400	0	2	0	2				250	824;3978	True;True	853;4110	1740;8697	1647;8268	1647;8268
SPAC26F1.03|pda1|I|pyruvate	SPAC26F1.03|pda1|I|pyruvate	5	5	5	>SPAC26F1.03|pda1|I|pyruvate dehydrogenase e1 component alpha subunit Pda1 (predicted)	1	5	5	5	4	4	4	4	4	4	18.8	18.8	18.8	45.137	409	409	0	10.788	By MS/MS	By MS/MS	16.4	16.1	36641000	24232000	12409000	22764000	13252000	5	5	10				251	346;1929;2581;3842;4028	True;True;True;True;True	357;1973;2651;3970;4161	777;778;779;780;4084;4085;5422;8435;8805;8806	733;734;735;736;3873;3874;5151;8025;8370;8371	733;3873;5151;8025;8370
SPAC26F1.06|gpm1|I|monomeric	SPAC26F1.06|gpm1|I|monomeric	16	16	16	>SPAC26F1.06|gpm1|I|monomeric 2,3-bisphosphoglycerate (BPG)-dependent phosphoglycerate mutase (PGAM), Gpm1	1	16	16	16	14	15	14	15	14	15	76.8	76.8	76.8	23.765	211	211	0	71.343	By MS/MS	By MS/MS	73	75.4	1206400000	575080000	631280000	565710000	552180000	19	25	44				252	288;289;954;1173;1795;2935;2936;4247;4248;4311;4364;4594;4888;5136;5429;5430	True;True;True;True;True;True;True;True;True;True;True;True;True;True;True;True	297;298;299;983;1205;1838;3013;3014;4382;4383;4448;4502;4744;4745;5050;5303;5602;5603	678;679;680;681;682;2001;2002;2003;2004;2005;2429;2430;3816;6112;6113;6114;9225;9226;9227;9356;9357;9460;9461;9462;9463;9983;9984;9985;9986;10615;10616;10617;10618;11085;11086;11777;11778;11779;11780;11781;11782	639;640;641;642;643;1887;1888;1889;1890;1891;2293;2294;3618;5813;5814;5815;5816;8763;8764;8765;8886;8887;8988;8989;8990;8991;8992;8993;9474;9475;9476;10074;10075;10076;10077;10533;10534;11208;11209;11210;11211;11212;11213;11214	641;642;1887;2294;3618;5813;5816;8763;8765;8887;8988;9475;10075;10533;11208;11213	71	172
SPAC26F1.07|SPAC26F1.07|I|glucose	SPAC26F1.07|SPAC26F1.07|I|glucose	2	2	2	>SPAC26F1.07|SPAC26F1.07|I|glucose 1-dehydrogenase (NADP+) (predicted)	1	2	2	2	2	2	2	2	2	2	10.3	10.3	10.3	36.192	321	321	0	9.8648	By MS/MS	By MS/MS	10.3	10.3	21931000	11909000	10023000	11966000	9460900	3	2	5				253	1814;1818	True;True	1857;1861	3860;3861;3867;3868	3659;3660;3666;3667;3668	3660;3666
SPAC26F1.13c|lrs1|I|cytoplasmic	SPAC26F1.13c|lrs1|I|cytoplasmic	12	12	12	>SPAC26F1.13c|lrs1|I|cytoplasmic leucine-tRNA ligase Lrs1 (predicted)	1	12	12	12	10	10	10	10	10	10	14.7	14.7	14.7	126.45	1111	1111	0	21.136	By MS/MS	By MS/MS	11.5	12.1	105610000	39167000	66441000	46830000	55436000	6	10	16				254	109;820;967;971;1323;1689;2337;2950;3904;3969;4736;5231	True;True;True;True;True;True;True;True;True;True;True;True	116;849;997;1001;1358;1731;2393;3029;4032;4101;4893;5400	352;353;1733;1734;2029;2030;2036;2749;3602;3603;4903;4904;6148;8546;8547;8681;10313;10314;11365;11366	326;327;1642;1643;1914;1915;1921;2596;3401;4649;4650;5847;8128;8252;9782;10822;10823	327;1643;1914;1921;2596;3401;4650;5847;8128;8252;9782;10822
SPAC26H5.07c|SPAC26H5.07c|I|seven	SPAC26H5.07c|SPAC26H5.07c|I|seven	3	3	3	>SPAC26H5.07c|SPAC26H5.07c|I|seven transmembrane receptor protein (predicted)	1	3	3	3	3	3	3	3	3	3	8.1	8.1	8.1	56.858	505	505	0	5.0637	By MS/MS	By MS/MS	8.1	8.1	58345000	34217000	24128000	30943000	26188000	2	2	4				255	2841;5371;5382	True;True;True	2916;5543;5554	5923;5924;11651;11652;11676;11677	5636;5637;11101;11123	5637;11101;11123
SPAC26H5.09c|SPAC26H5.09c|I|oxidoreductase	SPAC26H5.09c|SPAC26H5.09c|I|oxidoreductase	7	7	7	>SPAC26H5.09c|SPAC26H5.09c|I|oxidoreductase involved in NADPH regeneration (predicted)	1	7	7	7	6	7	6	7	6	7	29	29	29	41.432	369	369	0	29.955	By MS/MS	By MS/MS	26.3	29	109430000	39439000	69993000	53202000	52709000	4	6	10				256	307;784;964;2697;3439;3825;4359	True;True;True;True;True;True;True	318;811;994;2771;3550;3952;4497	709;710;1666;1667;2023;2024;5643;5644;7472;8404;8405;9448;9449	669;670;1574;1908;1909;5366;7107;7996;7997;8978	670;1574;1909;5366;7107;7997;8978
SPAC26H5.10c|tif51|I|translation;SPBC336.10c|tif512|II|translation	SPAC26H5.10c|tif51|I|translation;SPBC336.10c|tif512|II|translation	2;1	2;1	2;1	>SPAC26H5.10c|tif51|I|translation elongation factor eIF5A (predicted);>SPBC336.10c|tif512|II|translation elongation factor eIF5A (predicted)	2	2	2	2	2	2	2	2	2	2	19.1	19.1	19.1	17.152	157	157;169	0	9.5678	By MS/MS	By MS/MS	19.1	19.1	43306000	20289000	23018000	21145000	21003000	3	3	6				257	2964;4808	True;True	3043;4967	6172;6173;10459;10460;10461;10462	5870;5871;9921;9922;9923;9924	5871;9924
SPAC27D7.02c|grp1|I|GRIP	SPAC27D7.02c|grp1|I|GRIP	1	1	1	>SPAC27D7.02c|grp1|I|GRIP domain protein Grp1 (predicted)	1	1	1	1	1	0	1	0	1	0	1.3	1.3	1.3	87.264	750	750	0.0033708	1.3745	By MS/MS	By matching	1.3	0	0	0	0	0	0	1	0	1				258	2899	TRUE	2975	6041	5744	5744
SPAC27D7.14c|tpr1|I|RNA	SPAC27D7.14c|tpr1|I|RNA	6	6	6	>SPAC27D7.14c|tpr1|I|RNA polymerase II associated Paf1 complex subunit Tpr1	1	6	6	6	6	3	6	3	6	3	6.3	6.3	6.3	119.15	1039	1039	0	12.483	By MS/MS	By MS/MS	6.3	3.6	22726000	17960000	4766600	8678100	13808000	6	3	9				259	110;328;1872;3302;4075;5074	True;True;True;True;True;True	117;339;1915;3411;4208;5239	354;746;747;3979;3980;6988;6989;8907;10955	328;706;707;3771;3772;6647;6648;8473;10407	328;707;3772;6648;8473;10407
SPAC27E2.03c|SPAC27E2.03c|I|Obg-Like	SPAC27E2.03c|SPAC27E2.03c|I|Obg-Like	1	1	1	>SPAC27E2.03c|SPAC27E2.03c|I|Obg-Like ATPase (predicted)	1	1	1	1	1	1	1	1	1	1	3.8	3.8	3.8	44.332	392	392	0	6.0165	By MS/MS	By MS/MS	3.8	3.8	6879400	2569100	4310300	0	4093500	1	1	2				260	4953	TRUE	5116	10734;10735	10196;10197	10196
SPAC27E2.09|mak2|I|histidine	SPAC27E2.09|mak2|I|histidine	2	2	2	>SPAC27E2.09|mak2|I|histidine kinase Mak2	1	2	2	2	2	1	2	1	2	1	0.8	0.8	0.8	264.62	2310	2310	0	3.0342	By MS/MS	By MS/MS	0.8	0.5	3237100	3237100	0	3237100	0	2	1	3				261	885;2897	True;True	914;2973	1855;6037;6038	1759;5740;5741	1759;5740
SPAC29A4.02c|SPAC29A4.02c|I|translation	SPAC29A4.02c|SPAC29A4.02c|I|translation	16	16	16	>SPAC29A4.02c|SPAC29A4.02c|I|translation elongation factor EF-1 gamma subunit	1	16	16	16	14	14	14	14	14	14	49.9	49.9	49.9	45.701	409	409	0	65.745	By MS/MS	By MS/MS	45	43.3	710860000	322390000	388470000	318080000	373230000	16	18	34				262	114;597;816;1169;1215;1247;1870;2577;3106;3275;3966;4640;4729;4759;4902;5439	True;True;True;True;True;True;True;True;True;True;True;True;True;True;True;True	121;616;845;1201;1248;1282;1913;2647;3186;3378;4098;4791;4886;4916;5064;5612	360;361;1285;1286;1287;1288;1727;2420;2512;2513;2608;2609;2610;3975;3976;5415;5416;6446;6447;6925;6926;8674;10082;10302;10303;10355;10356;10644;10645;11799;11800;11801;11802	334;335;1211;1212;1213;1214;1636;2285;2378;2379;2469;2470;3768;3769;5145;6128;6129;6582;6583;8246;9567;9772;9773;9822;9823;10103;10104;10105;11230;11231;11232;11233;11234;11235	335;1211;1636;2285;2379;2469;3769;5145;6129;6583;8246;9567;9773;9822;10103;11235
SPAC29A4.04c|cbf5|I|pseudouridylate	SPAC29A4.04c|cbf5|I|pseudouridylate	1	1	1	>SPAC29A4.04c|cbf5|I|pseudouridylate synthase Cbf5 (predicted)	1	1	1	1	0	1	0	1	0	1	2.7	2.7	2.7	53.11	474	474	0	2.633	By matching	By MS/MS	0	2.7	1479100	0	1479100	0	1404600	0	1	1				263	4845	TRUE	5006	10539	9997	9997
SPAC29A4.15|srs1|I|cytoplasmic	SPAC29A4.15|srs1|I|cytoplasmic	8	8	8	>SPAC29A4.15|srs1|I|cytoplasmic serine-tRNA ligase Srs1 (predicted)	1	8	8	8	7	8	7	8	7	8	21.3	21.3	21.3	51.642	450	450	0	27.026	By MS/MS	By MS/MS	17.1	21.3	156490000	77999000	78488000	77255000	75283000	8	7	15				264	251;568;1743;2026;2313;3316;4069;4353	True;True;True;True;True;True;True;True	260;585;1785;2071;2368;3425;4202;4491	611;1224;1225;3713;3714;4273;4274;4854;4855;7201;7202;8894;8895;9432;9433	573;1151;1152;3514;4053;4054;4603;4604;6853;6854;8460;8461;8462;8962;8963	573;1152;3514;4053;4604;6854;8460;8963
SPAC29A4.16|hal4|I|serine/threonine	SPAC29A4.16|hal4|I|serine/threonine	4	4	4	>SPAC29A4.16|hal4|I|serine/threonine protein kinase Hal4	1	4	4	4	4	2	4	2	4	2	6.6	6.6	6.6	69.114	636	636	0	4.911	By MS/MS	By MS/MS	6.6	3.9	131190000	123140000	8046600	69827000	60959000	4	1	5				265	1160;1441;2297;3541	True;True;True;True	1192;1477;2352;3657	2405;3048;4825;4826;7679;7680	2273;2872;4579;7310;7311	2273;2872;4579;7311
SPAC29A4.18|prw1|I|Clr6	SPAC29A4.18|prw1|I|Clr6	7	7	7	>SPAC29A4.18|prw1|I|Clr6 histone deacetylase complex subunit Prw1	1	7	7	7	7	5	7	5	7	5	22.5	22.5	22.5	48.476	431	431	0	25.577	By MS/MS	By MS/MS	22.5	15.5	250860000	136280000	114590000	144730000	100370000	7	5	12				266	1876;2265;2740;3519;4439;4517;4939	True;True;True;True;True;True;True	1919;2320;2814;3634;4581;4663;5102	3989;3990;4769;4770;5739;5740;7636;7637;9634;9635;9826;9827;10711	3779;4525;4526;5453;5454;7269;7270;9143;9144;9330;9331;10172	3779;4526;5453;7269;9143;9330;10172
SPAC29A4.20|elp3|I|elongator	SPAC29A4.20|elp3|I|elongator	7	7	7	>SPAC29A4.20|elp3|I|elongator complex subunit Elp3 (predicted)	1	7	7	7	6	5	6	5	6	5	16.5	16.5	16.5	61.849	544	544	0	8.3331	By MS/MS	By MS/MS	14.2	11.2	58191000	31851000	26340000	29841000	27024000	3	4	7				267	637;970;1686;2131;2628;3091;3590	True;True;True;True;True;True;True	657;1000;1728;2179;2698;3171;3709	1371;2034;2035;3597;3598;4485;4486;5496;6416;6417;7819	1292;1919;1920;3396;3397;4254;4255;5224;6102;7445	1292;1919;3396;4254;5224;6102;7445
SPAC29B12.01|ino80|I|SNF2	SPAC29B12.01|ino80|I|SNF2	2	2	2	>SPAC29B12.01|ino80|I|SNF2 family ATP-dependent 3 to 5 DNA helicase Ino80	1	2	2	2	1	2	1	2	1	2	1.4	1.4	1.4	183.05	1604	1604	0	5.8115	By MS/MS	By MS/MS	0.9	1.4	1587800	951130	636710	0	604670	1	1	2				268	1313;2731	True;True	1348;2805	2732;5718;5719	2580;5432;5433	2580;5432
SPAC29B12.04|snz1|I|pyridoxine	SPAC29B12.04|snz1|I|pyridoxine	5	5	5	>SPAC29B12.04|snz1|I|pyridoxine biosynthesis protein	1	5	5	5	5	5	5	5	5	5	20.9	20.9	20.9	31.403	296	296	0	11.056	By MS/MS	By MS/MS	20.9	20.9	59604000	25075000	34528000	26121000	31745000	4	6	10				269	920;934;1397;1520;4466	True;True;True;True;True	949;963;1433;1556;4610	1928;1929;1957;1958;2973;2974;3215;3216;9707;9708	1826;1827;1854;2799;2800;2801;3027;3028;9216;9217	1826;1854;2799;3027;9217
SPAC29B12.06c|rcd1|I|RNA-binding	SPAC29B12.06c|rcd1|I|RNA-binding	1	1	1	>SPAC29B12.06c|rcd1|I|RNA-binding protein, CCR4-NOT complex subunit Rcd1	1	1	1	1	0	1	0	1	0	1	4.2	4.2	4.2	32.211	283	283	0	1.8116	By matching	By MS/MS	0	4.2	1483400	0	1483400	0	1408800	0	1	1				270	3114	TRUE	3194	6462	6145	6145
SPAC521.05|rps802|I|40S;SPAC2C4.16c|rps801|I|40S	SPAC521.05|rps802|I|40S;SPAC2C4.16c|rps801|I|40S	5;5	5;5	5;5	>SPAC521.05|rps802|I|40S ribosomal protein S8 (predicted);>SPAC2C4.16c|rps801|I|40S ribosomal protein S8 (predicted)	2	5	5	5	5	4	5	4	5	4	34.5	34.5	34.5	22.564	200	200;200	0	14.41	By MS/MS	By MS/MS	34.5	28	73413000	31361000	42052000	30365000	40932000	5	3	8				271	2113;2618;3198;3879;4725	True;True;True;True;True	2160;2688;3278;4007;4882	4439;4440;5479;5480;6643;6644;8498;8499;10295	4216;5208;5209;6315;6316;8086;8087;9766	4216;5208;6315;8086;9766
SPAC2E1P3.04|cao1|I|copper	SPAC2E1P3.04|cao1|I|copper	27	27	26	>SPAC2E1P3.04|cao1|I|copper amine oxidase Cao1	1	27	27	26	26	26	26	26	25	25	54.2	54.2	52.5	81.24	712	712	0	94.351	By MS/MS	By MS/MS	50.8	53.9	1562500000	864020000	698500000	882800000	642160000	32	25	57				272	93;612;632;825;898;1033;1105;1709;1720;1758;1781;1782;1806;1941;2562;2736;2910;2943;3044;3249;3282;3304;4112;4140;4629;5061;5295	True;True;True;True;True;True;True;True;True;True;True;True;True;True;True;True;True;True;True;True;True;True;True;True;True;True;True	100;631;652;854;927;1064;1137;1751;1762;1801;1824;1825;1849;1985;2631;2810;2986;2987;3022;3123;3342;3386;3413;4245;4273;4780;5226;5465	209;210;1322;1323;1360;1361;1741;1742;1879;1880;1881;1882;2163;2164;2302;2303;2304;3639;3640;3659;3660;3746;3747;3792;3793;3794;3842;3843;3844;3845;4106;4107;5386;5387;5727;5728;6061;6062;6063;6131;6132;6323;6324;6840;6841;6942;6943;6944;7182;7183;8972;8973;9026;10061;10062;10928;10929;11496;11497	204;1246;1247;1280;1281;1648;1780;1781;1782;1783;2044;2045;2169;2170;2171;3437;3438;3458;3459;3545;3591;3592;3593;3643;3644;3645;3893;3894;5117;5118;5441;5763;5764;5765;5830;5831;5832;6015;6016;6017;6497;6498;6599;6600;6601;6602;6603;6838;8534;8535;8581;9546;9547;10379;10380;10952;10953	204;1246;1281;1648;1780;2044;2171;3438;3459;3545;3591;3593;3643;3894;5118;5441;5764;5830;6017;6497;6603;6838;8535;8581;9546;10379;10953	72;73	268;554
SPAC2F3.09|hem1|I|5-aminolevulinate	SPAC2F3.09|hem1|I|5-aminolevulinate	15	15	15	>SPAC2F3.09|hem1|I|5-aminolevulinate synthase Hem1	1	15	15	15	13	14	13	14	13	14	40.5	40.5	40.5	60.959	558	558	0	51.082	By MS/MS	By MS/MS	35.8	35.5	638380000	236600000	401780000	253760000	364400000	13	14	27				273	837;1134;1181;1182;1327;1443;1861;1912;2546;2549;3765;4064;4716;5249;5256	True;True;True;True;True;True;True;True;True;True;True;True;True;True;True	866;1166;1213;1214;1362;1479;1904;1956;2615;2618;3889;4197;4871;5418;5425	1767;1768;2356;2357;2443;2444;2445;2446;2447;2448;2757;2758;3051;3052;3949;3950;4053;5354;5355;5356;5357;5362;8194;8195;8884;10276;10277;11402;11403;11416;11417	1672;2223;2224;2307;2308;2309;2310;2311;2312;2603;2604;2875;2876;3745;3846;5087;5088;5089;5094;7813;8450;9748;9749;10862;10863;10874;10875	1672;2224;2308;2311;2604;2875;3745;3846;5088;5094;7813;8450;9748;10863;10875
SPAC2F7.03c|pom1|I|DYRK	SPAC2F7.03c|pom1|I|DYRK	3	3	3	>SPAC2F7.03c|pom1|I|DYRK family protein kinase Pom1	1	3	3	3	2	3	2	3	2	3	2.6	2.6	2.6	121.14	1087	1087	0	4.3017	By MS/MS	By MS/MS	1.8	2.6	13439000	2583300	10855000	0	10309000	2	3	5				274	1608;3451;5087	True;True;True	1646;3562;5253	3437;7492;7493;10985;10986	3238;7126;7127;10435;10436	3238;7126;10435
SPAC2F7.08c|snf5|I|SWI/SNF	SPAC2F7.08c|snf5|I|SWI/SNF	2	2	2	>SPAC2F7.08c|snf5|I|SWI/SNF complex subunit Snf5	1	2	2	2	2	1	2	1	2	1	2.5	2.5	2.5	71.915	632	632	0	3.7173	By MS/MS	By matching	2.5	1.1	6675500	5680300	995220	5680300	0	2	0	2				275	1383;2991	True;True	1419;3070	2949;2950;6221	2777;5916	2777;5916
SPAC2F7.13c|wrs1|I|cytoplasmic	SPAC2F7.13c|wrs1|I|cytoplasmic	3	3	3	>SPAC2F7.13c|wrs1|I|cytoplasmic tryptophan-tRNA ligase Wrs1 (predicted)	1	3	3	3	3	3	3	3	3	3	9.6	9.6	9.6	44.91	395	395	0	8.2536	By MS/MS	By MS/MS	9.6	9.6	26167000	9370400	16796000	9323700	15998000	2	3	5				276	1205;1759;2879	True;True;True	1238;1802;2954	2493;2494;3748;3749;3750;6004;6005	2358;2359;3546;3547;5708	2359;3547;5708
SPAC2F7.16c|pld1|I|phospholipase	SPAC2F7.16c|pld1|I|phospholipase	2	2	2	>SPAC2F7.16c|pld1|I|phospholipase D, Pld1	1	2	2	2	2	1	2	1	2	1	2.3	2.3	2.3	157.73	1369	1369	0	1.8371	By MS/MS	By matching	2.3	1.7	121020000	62151000	58865000	62151000	0	2	0	2				277	1111;4751	True;True	1143;4908	2312;10338;10339	2178;9805	2178;9805
SPAC30.01c|sec72|I|Sec7	SPAC30.01c|sec72|I|Sec7	7	7	7	>SPAC30.01c|sec72|I|Sec7 domain protein, ARF GEF Sec72	1	7	7	7	5	6	5	6	5	6	4.6	4.6	4.6	206.8	1822	1822	0	15.162	By MS/MS	By MS/MS	3.1	4.2	36377000	16471000	19906000	16906000	18470000	4	6	10				278	179;758;1892;2276;4125;4631;4993	True;True;True;True;True;True;True	187;783;1935;2331;4258;4782;5156	475;476;1615;4016;4017;4787;4788;8999;10065;10805;10806	440;441;1529;3806;3807;4542;4543;8556;9549;10266;10267	441;1529;3806;4542;8556;9549;10266
SPAC30.04c|abc4|I|glutathione	SPAC30.04c|abc4|I|glutathione	2	2	2	>SPAC30.04c|abc4|I|glutathione S-conjugate-exporting ATPase Abc4	1	2	2	2	2	0	2	0	2	0	1.6	1.6	1.6	164.79	1469	1469	0	4.1013	By MS/MS	By matching	1.6	0	1798600	1798600	0	1798600	0	2	0	2				279	697;4217	True;True	719;4352	1486;9173	1405;8718	1405;8718
SPAC30C2.04|asc1|I|cofactor	SPAC30C2.04|asc1|I|cofactor	4	4	4	>SPAC30C2.04|asc1|I|cofactor for cytoplasmic methionyl-and glutamyl-tRNA synthetases Asc1 (predicted)	1	4	4	4	3	3	3	3	3	3	14.2	14.2	14.2	50.606	450	450	0	11.945	By MS/MS	By MS/MS	10.2	10.4	16875000	10651000	6223700	10651000	0	3	2	5				280	126;480;3097;5338	True;True;True;True	134;495;3177;5509	382;383;1042;6426;11583;11584	353;976;6109;11029;11030	353;976;6109;11029
SPAC30C2.08|SPAC30C2.08|I|conserved	SPAC30C2.08|SPAC30C2.08|I|conserved	1	1	1	>SPAC30C2.08|SPAC30C2.08|I|conserved fungal protein	1	1	1	1	1	1	1	1	1	1	3.9	3.9	3.9	52.69	457	457	0	5.6473	By matching	By MS/MS	3.9	3.9	20045000	9946400	10099000	0	9590500	0	1	1				281	3682	TRUE	3803	8002;8003	7618	7618
SPBC577.02|rpl3801|II|60S;SPAC30D11.12|rpl3802|I|60S	SPBC577.02|rpl3801|II|60S;SPAC30D11.12|rpl3802|I|60S	1;1	1;1	1;1	>SPBC577.02|rpl3801|II|60S ribosomal protein L38 (predicted);>SPAC30D11.12|rpl3802|I|60S ribosomal protein L38 (predicted)	2	1	1	1	1	1	1	1	1	1	14.9	14.9	14.9	8.4919	74	74;74	0	3.285	By MS/MS	By MS/MS	14.9	14.9	18108000	6602400	11505000	0	10926000	1	1	2				282	5345	TRUE	5516	11597;11598	11042;11043	11043
SPAC31G5.04|lys12|I|homoisocitrate	SPAC31G5.04|lys12|I|homoisocitrate	4	4	4	>SPAC31G5.04|lys12|I|homoisocitrate dehydrogenase Lys12	1	4	4	4	4	4	4	4	4	4	13.3	13.3	13.3	39.256	362	362	0	13.588	By MS/MS	By MS/MS	13.3	13.3	55711000	25571000	30141000	24916000	29279000	5	5	10				283	1576;2335;2461;3994	True;True;True;True	1613;2391;2523;4128	3375;3376;4900;4901;5162;5163;8731;8732	3176;3177;4645;4646;4647;4898;4899;4900;4901;8302	3177;4645;4898;8302
SPAC31G5.09c|spk1|I|MAP	SPAC31G5.09c|spk1|I|MAP	1	1	1	>SPAC31G5.09c|spk1|I|MAP kinase Spk1	1	1	1	1	1	0	1	0	1	0	2.2	2.2	2.2	42.003	372	372	0.0044199	1.2305	By MS/MS	By matching	2.2	0	2296800	2296800	0	2296800	0	1	0	1				284	4649	TRUE	4800	10100	9584	9584
SPAC31G5.13|rpn11|I|19S	SPAC31G5.13|rpn11|I|19S	1	1	1	>SPAC31G5.13|rpn11|I|19S proteasome regulatory subunit Rpn11	1	1	1	1	1	0	1	0	1	0	4.2	4.2	4.2	34.572	308	308	0	3.8904	By MS/MS	By matching	4.2	0	0	0	0	0	0	1	0	1				285	4392	TRUE	4531	9514	9042	9042
SPAC31G5.14|gcv1|I|glycine	SPAC31G5.14|gcv1|I|glycine	4	4	4	>SPAC31G5.14|gcv1|I|glycine decarboxylase T subunit (predicted)	1	4	4	4	4	3	4	3	4	3	13.7	13.7	13.7	42.408	387	387	0	12.873	By MS/MS	By MS/MS	13.7	10.9	34758000	19928000	14830000	18773000	15239000	4	3	7				286	280;1474;2778;4557	True;True;True;True	289;1510;2852;4703	664;665;3124;3125;5807;9903;9904	623;624;625;2941;5521;9398;9399	623;2941;5521;9399
SPAC31G5.17c|rps1001|I|40S	SPAC31G5.17c|rps1001|I|40S	3	1	1	>SPAC31G5.17c|rps1001|I|40S ribosomal protein S10 (predicted)	1	3	1	1	3	3	1	1	1	1	29.9	10.4	10.4	16.275	144	144	0	3.7572	By MS/MS	By MS/MS	29.9	29.9	29097000	12068000	17029000	0	16173000	2	1	3				287	207;1131;1869	True;False;False	215;1163;1912	526;527;2350;2351;2352;3973;3974	491;492;493;2218;2219;3766;3767	493;2219;3766
SPAC323.04|SPAC323.04|I|mitochondrial	SPAC323.04|SPAC323.04|I|mitochondrial	2	2	2	>SPAC323.04|SPAC323.04|I|mitochondrial ATPase (predicted)	1	2	2	2	2	2	2	2	2	2	4.9	4.9	4.9	54.841	487	487	0	3.691	By MS/MS	By MS/MS	4.9	4.9	22071000	10387000	11684000	0	11096000	2	2	4				288	3186;4904	True;True	3266;5066	6621;6622;10648;10649	6295;6296;10108;10109	6295;10108
SPAC323.07c|SPAC323.07c|I|MatE	SPAC323.07c|SPAC323.07c|I|MatE	2	2	2	>SPAC323.07c|SPAC323.07c|I|MatE family transmembrane transporter (predicted)	1	2	2	2	2	1	2	1	2	1	6.8	6.8	6.8	58.597	533	533	0	2.4587	By MS/MS	By MS/MS	6.8	1.5	16376000	9233100	7142600	9233100	0	2	1	3				289	1775;2722	True;True	1818;2796	3782;3783;5699	3580;3581;5416	3580;5416
SPAC328.03|tps1|I|alpha,alpha-trehalose-phosphate	SPAC328.03|tps1|I|alpha,alpha-trehalose-phosphate	7	7	7	>SPAC328.03|tps1|I|alpha,alpha-trehalose-phosphate synthase [UDP-forming]	1	7	7	7	7	7	7	7	7	7	14.4	14.4	14.4	58.493	513	513	0	19.353	By MS/MS	By MS/MS	14.4	14.4	162140000	66071000	96072000	70977000	86332000	4	8	12				290	20;485;1229;2058;4851;4852;5089	True;True;True;True;True;True;True	21;500;1263;2103;5012;5013;5255	34;35;1048;1049;2550;2551;4327;4328;10551;10552;10553;10554;10989;10990	32;33;982;2412;4109;10009;10010;10011;10012;10013;10438;10439	32;982;2412;4109;10010;10012;10438
SPAC328.06|ubp2|I|ubiquitin	SPAC328.06|ubp2|I|ubiquitin	5	5	5	>SPAC328.06|ubp2|I|ubiquitin C-terminal hydrolase Ubp2	1	5	5	5	3	5	3	5	3	5	5.8	5.8	5.8	130.3	1141	1141	0	4.7284	By MS/MS	By MS/MS	2.9	5.8	41457000	21305000	20152000	22113000	18329000	2	6	8				291	223;312;2665;3328;4229	True;True;True;True;True	232;323;2737;3437;4364	553;554;718;5581;5582;7226;7227;7228;9195	517;679;5308;5309;6876;6877;6878;8736	517;679;5308;6877;8736
SPAC328.10c|rps502|I|40S;SPAC8C9.08|rps5|I|40S	SPAC328.10c|rps502|I|40S;SPAC8C9.08|rps5|I|40S	6;5	6;5	6;5	>SPAC328.10c|rps502|I|40S ribosomal protein S5 (predicted);>SPAC8C9.08|rps5|I|40S ribosomal protein S5 (predicted)	2	6	6	6	5	6	5	6	5	6	39.4	39.4	39.4	22.357	203	203;203	0	18.182	By MS/MS	By MS/MS	34.5	39.4	153250000	66839000	86413000	72788000	76117000	4	7	11				292	658;1115;1316;3854;4045;4947	True;True;True;True;True;True	679;1147;1351;3982;4178;5110	1404;1405;2317;2318;2737;2738;8453;8837;8838;8839;10722;10723	1324;1325;1326;2182;2584;2585;8044;8401;8402;10183;10184	1324;2182;2585;8044;8401;10184
SPAC343.04c|gid7|I|GID	SPAC343.04c|gid7|I|GID	3	3	3	>SPAC343.04c|gid7|I|GID complex subunit Gid7 (predicted)	1	3	3	3	2	2	2	2	2	2	8.1	8.1	8.1	58.403	507	507	0	10.096	By MS/MS	By MS/MS	5.7	4.3	6133300	2088300	4045000	2088300	0	3	2	5				293	2604;3841;4287	True;True;True	2674;3969;4424	5456;8433;8434;9305	5186;5187;8023;8024;8838	5186;8024;8838
SPAC343.05|vma1|I|V-type	SPAC343.05|vma1|I|V-type	8	8	8	>SPAC343.05|vma1|I|V-type ATPase V1 domain, subunit A	1	8	8	8	5	6	5	6	5	6	17	17	17	68.805	619	619	0	11.24	By MS/MS	By MS/MS	13.1	12.9	83686000	31987000	51699000	42076000	39009000	5	5	10				294	918;1884;2055;2521;4599;4961;4962;5393	True;True;True;True;True;True;True;True	947;1927;2100;2588;4750;5124;5125;5566	1924;4003;4321;4322;5295;5296;9997;9998;10747;10748;11699	1822;3793;4102;4103;5027;9486;9487;10211;10212;11142	1822;3793;4103;5027;9487;10211;10212;11142
SPAC343.14c|tif222|I|translation	SPAC343.14c|tif222|I|translation	1	1	1	>SPAC343.14c|tif222|I|translation initiation factor eIF2B beta subunit	1	1	1	1	1	1	1	1	1	1	3.1	3.1	3.1	43.221	393	393	0.0011351	1.4226	By MS/MS	By MS/MS	3.1	3.1	8572900	4673600	3899400	0	3703200	1	1	2				295	5171	TRUE	5338	11145;11146	10597;10598	10597
SPAC3A11.05c|kms1|I|meiotic	SPAC3A11.05c|kms1|I|meiotic	4	4	4	>SPAC3A11.05c|kms1|I|meiotic spindle pole body protein Kms1	1	4	4	4	0	4	0	4	0	4	5.1	5.1	5.1	69.24	607	607	0	4.1199	By matching	By MS/MS	0	5.1	10449000	0	10449000	0	9923500	0	5	5				296	945;1840;4548;5149	True;True;True;True	974;1883;4694;5316	1983;3911;3912;9886;11110	1872;3708;3709;9385;10560	1872;3708;9385;10560
SPAC3A11.07|nde2|I|mitochondrial	SPAC3A11.07|nde2|I|mitochondrial	11	11	11	>SPAC3A11.07|nde2|I|mitochondrial NADH dehydrogenase (ubiquinone) Nde2 (predicted)	1	11	11	11	11	10	11	10	11	10	27.8	27.8	27.8	61.674	551	551	0	24.849	By MS/MS	By MS/MS	27.8	26.1	177290000	99097000	78196000	81239000	92120000	10	9	19				297	1431;1813;2143;2721;3026;3583;4302;4442;4538;5028;5389	True;True;True;True;True;True;True;True;True;True;True	1467;1856;2192;2795;3105;3702;4439;4584;4684;5193;5562	3031;3032;3858;3859;4507;4508;5697;5698;6287;6288;7792;7793;9334;9335;9642;9643;9864;10875;10876;11689;11690;11691;11692	2857;3658;4275;4276;5414;5415;5978;5979;7419;7420;8866;8867;9151;9152;9366;10328;10329;11134;11135	2857;3658;4275;5414;5978;7419;8866;9152;9366;10329;11135
SPAC3A11.10c|dpe1|I|dipeptidyl	SPAC3A11.10c|dpe1|I|dipeptidyl	3	3	3	>SPAC3A11.10c|dpe1|I|dipeptidyl peptidase (predicted)	1	3	3	3	3	2	3	2	3	2	8.6	8.6	8.6	46.047	409	409	0	7.9895	By MS/MS	By MS/MS	8.6	5.1	33353000	21730000	11622000	18658000	14110000	3	2	5				298	1583;1612;3669	True;True;True	1620;1650;3789	3390;3443;3444;7970;7971	3192;3244;3245;7590;7591	3192;3245;7590
SPAC3A11.12c|rpt5|I|19S	SPAC3A11.12c|rpt5|I|19S	3	3	3	>SPAC3A11.12c|rpt5|I|19S proteasome regulatory subunit Rpt5 (predicted)	1	3	3	3	2	3	2	3	2	3	11.9	11.9	11.9	48.835	438	438	0	11.095	By MS/MS	By MS/MS	8.2	11.9	31272000	12307000	18965000	14448000	15870000	2	2	4				299	759;3779;4727	True;True;True	784;3903;4884	1616;8218;8219;10298;10299	1530;7832;9769;9770	1530;7832;9770
SPAC3A12.18|zwf1|I|glucose-6-phosphate	SPAC3A12.18|zwf1|I|glucose-6-phosphate	7	7	7	>SPAC3A12.18|zwf1|I|glucose-6-phosphate 1-dehydrogenase (predicted)	1	7	7	7	6	6	6	6	6	6	20	20	20	57.204	500	500	0	19.877	By MS/MS	By MS/MS	18	18	75278000	23444000	51834000	27714000	44956000	2	6	8				300	660;1012;1521;1718;3890;4061;4995	True;True;True;True;True;True;True	681;1043;1557;1760;4018;4194;5158	1408;1409;2122;3217;3218;3655;3656;8519;8520;8877;8878;10808	1329;1330;2007;3029;3455;8104;8442;10269	1329;2007;3029;3455;8104;8442;10269
SPAC3C7.04|SPAC3C7.04|I|transcription	SPAC3C7.04|SPAC3C7.04|I|transcription	1	1	1	>SPAC3C7.04|SPAC3C7.04|I|transcription factor (predicted)	1	1	1	1	1	0	1	0	1	0	2.4	2.4	2.4	87.957	783	783	0	2.9293	By MS/MS	By matching	2.4	0	3058100	3058100	0	3058100	0	1	0	1				301	4092	TRUE	4225	8935	8498	8498
SPAC3C7.08c|elf1|I|AAA	SPAC3C7.08c|elf1|I|AAA	10	10	10	>SPAC3C7.08c|elf1|I|AAA family ATPase Elf1	1	10	10	10	8	9	8	9	8	9	13.8	13.8	13.8	116.7	1057	1057	0	34.807	By MS/MS	By MS/MS	11.4	12.8	122570000	60058000	62510000	74937000	44486000	7	11	18				302	52;247;553;1050;2779;4324;4559;4596;4647;4804	True;True;True;True;True;True;True;True;True;True	53;256;569;1081;2853;4461;4705;4747;4798;4963	106;107;602;603;604;605;1191;1192;2194;5808;5809;9382;9383;9907;9908;9990;10097;10098;10449;10450;10451	104;105;563;564;565;566;1120;1121;2071;5522;8914;9402;9403;9479;9581;9582;9911;9912;9913	104;563;1121;2071;5522;8914;9403;9479;9582;9912
SPAC3C7.11c|cnx1|I|calnexin	SPAC3C7.11c|cnx1|I|calnexin	4	4	4	>SPAC3C7.11c|cnx1|I|calnexin Cnx1	1	4	4	4	3	3	3	3	3	3	9.8	9.8	9.8	63.465	560	560	0	10.716	By MS/MS	By MS/MS	7.1	6.8	53672000	27595000	26077000	23986000	28374000	2	3	5				303	365;1271;2002;2801	True;True;True;True	376;1306;2047;2875	810;811;2650;2651;4225;5852	765;2506;2507;4007;5565	765;2507;4007;5565	74	148
SPAC3C7.14c|obr1|I|ubiquitinated	SPAC3C7.14c|obr1|I|ubiquitinated	2	2	2	>SPAC3C7.14c|obr1|I|ubiquitinated protein Uhp1	1	2	2	2	1	1	1	1	1	1	9.4	9.4	9.4	21.898	202	202	0	1.8594	By MS/MS	By MS/MS	4	5.4	6607100	0	6607100	0	6274700	1	1	2				304	2233;3575	True;True	2286;3692	4694;7771	4449;7398	4449;7398
SPAC3F10.03|grs1|I|mitochondrial	SPAC3F10.03|grs1|I|mitochondrial	6	6	6	>SPAC3F10.03|grs1|I|mitochondrial and cytoplasmic glycine-tRNA ligase Grs1	1	6	6	6	6	6	6	6	6	6	12	12	12	74.004	652	652	0	22.287	By MS/MS	By MS/MS	12	12	94706000	44959000	49747000	39678000	52525000	7	6	13				305	51;291;1670;1747;3298;4645	True;True;True;True;True;True	52;301;1711;1789;3407;4796	102;103;104;105;684;685;3561;3562;3719;3720;6981;6982;10093;10094	100;101;102;103;645;646;3360;3519;3520;3521;6641;9577;9578	101;646;3360;3521;6641;9577
SPAC3F10.11c|abc2|I|glutathione	SPAC3F10.11c|abc2|I|glutathione	3	3	3	>SPAC3F10.11c|abc2|I|glutathione S-conjugate-exporting ATPase Abc2	1	3	3	3	2	1	2	1	2	1	2.6	2.6	2.6	166.94	1478	1478	0	2.6987	By MS/MS	By MS/MS	1.4	1.2	1656700	0	1656700	0	1573300	2	1	3				306	1399;1684;3199	True;True;True	1435;1726;3279	2977;3595;6645	2804;3394;6317	2804;3394;6317
SPCC1322.11|rpl2302|III|60S;SPAC3G9.03|rpl2301|I|60S	SPCC1322.11|rpl2302|III|60S;SPAC3G9.03|rpl2301|I|60S	1;1	1;1	1;1	>SPCC1322.11|rpl2302|III|60S ribosomal protein L23;>SPAC3G9.03|rpl2301|I|60S ribosomal protein L23	2	1	1	1	1	1	1	1	1	1	9.4	9.4	9.4	14.882	139	139;139	0	2.8578	By MS/MS	By matching	9.4	9.4	15405000	8666500	6738200	0	6399200	1	0	1				307	3457	TRUE	3568	7502;7503	7135	7135
SPAC3G9.05|spa2|I|cell	SPAC3G9.05|spa2|I|cell	5	5	5	>SPAC3G9.05|spa2|I|cell polarity protein Spa2	1	5	5	5	2	4	2	4	2	4	8.8	8.8	8.8	73.872	659	659	0	9.1137	By MS/MS	By MS/MS	4.1	6.7	19731000	6839500	12891000	6839500	0	1	2	3				308	189;627;4088;4807;5320	True;True;True;True;True	197;647;4221;4966;5490	492;1353;8928;10458;11551;11552	456;1274;8492;9920;11000	456;1274;8492;9920;11000
SPAC3G9.06|frs2|I|cytoplasmic	SPAC3G9.06|frs2|I|cytoplasmic	6	6	6	>SPAC3G9.06|frs2|I|cytoplasmic phenylalanine-tRNA ligase alpha subunit Frs2 (predicted)	1	6	6	6	6	4	6	4	6	4	14.8	14.8	14.8	56.266	499	499	0	11.139	By MS/MS	By MS/MS	14.8	9	47558000	23009000	24549000	24826000	21497000	4	3	7				309	360;561;2622;4905;4941;4955	True;True;True;True;True;True	371;578;2692;5067;5104;5118	801;802;1208;1209;5485;5486;10650;10651;10714;10738	759;1137;1138;5215;10110;10111;10175;10200	759;1138;5215;10111;10175;10200
SPAC3G9.09c|tif211|I|translation	SPAC3G9.09c|tif211|I|translation	5	5	5	>SPAC3G9.09c|tif211|I|translation initiation factor eIF2 alpha subunit	1	5	5	5	5	4	5	4	5	4	19.9	19.9	19.9	34.525	306	306	0	15.445	By MS/MS	By MS/MS	19.9	15.7	31514000	16829000	14685000	18795000	11980000	5	6	11				310	4;2431;3124;3333;3995	True;True;True;True;True	4;2491;3204;3444;4129	7;8;5094;5095;6481;6482;6483;6484;7244;7245;8733	7;8;4834;4835;6163;6164;6165;6166;6167;6894;6895;8303	8;4835;6165;6894;8303
SPAC3H1.05|ste24|I|CAAX	SPAC3H1.05|ste24|I|CAAX	1	1	1	>SPAC3H1.05|ste24|I|CAAX prenyl protease (predicted)	1	1	1	1	1	1	1	1	1	1	3.2	3.2	3.2	54.001	474	474	0	2.9151	By MS/MS	By MS/MS	3.2	3.2	4561600	2109600	2451900	0	2328600	1	0	1				311	4244	TRUE	4379	9219;9220	8758;8759	8758
SPAC3H1.07|aru1|I|arginase;SPBP26C9.02c|car1|II|arginase	SPAC3H1.07|aru1|I|arginase;SPBP26C9.02c|car1|II|arginase	2;1	2;1	2;1	>SPAC3H1.07|aru1|I|arginase Aru1;>SPBP26C9.02c|car1|II|arginase Car1	2	2	2	2	1	2	1	2	1	2	6.8	6.8	6.8	35.703	323	323;323	0	2.2791	By MS/MS	By MS/MS	2.2	6.8	1295500	1295500	0	1295500	0	1	2	3				312	156;2523	True;True	164;2590	432;5299;5300	399;5031;5032	399;5031
SPAC3H1.10|pcs2|I|phytochelatin	SPAC3H1.10|pcs2|I|phytochelatin	1	1	1	>SPAC3H1.10|pcs2|I|phytochelatin synthetase	1	1	1	1	1	0	1	0	1	0	1.9	1.9	1.9	46.741	414	414	0.0085653	1.0406	By MS/MS	By matching	1.9	0	0	0	0	0	0	1	0	1				313	2146	TRUE	2195	4513	4283	4283
SPBC18H10.13|rps1402|II|40S;SPAC3H5.05c|rps1401|I|40S	SPBC18H10.13|rps1402|II|40S;SPAC3H5.05c|rps1401|I|40S	4;4	4;4	4;4	>SPBC18H10.13|rps1402|II|40S ribosomal protein S14 (predicted);>SPAC3H5.05c|rps1401|I|40S ribosomal protein S14 (predicted)	2	4	4	4	2	4	2	4	2	4	51.8	51.8	51.8	14.699	139	139;139	0	15.012	By MS/MS	By MS/MS	24.5	51.8	50349000	18446000	31903000	20968000	27776000	3	4	7				314	1099;2007;3970;4379	True;True;True;True	1131;2052;4102;4517	2288;4235;4236;8682;9483;9484	2157;4016;4017;8253;9011;9012;9013	2157;4016;8253;9013
SPAC3H5.07|rpl702|I|60S	SPAC3H5.07|rpl702|I|60S	3	3	3	>SPAC3H5.07|rpl702|I|60S ribosomal protein L7	1	3	3	3	2	2	2	2	2	2	13.6	13.6	13.6	28.449	250	250	0	8.8649	By MS/MS	By MS/MS	9.6	10	15444000	4958200	10486000	0	9958000	1	2	3				315	2214;3072;3621	True;True;True	2266;3152;3740	4653;4654;6382;7878	4411;6070;7503	4411;6070;7503
SPAC3H5.08c|SPAC3H5.08c|I|WD	SPAC3H5.08c|SPAC3H5.08c|I|WD	3	3	3	>SPAC3H5.08c|SPAC3H5.08c|I|WD repeat protein, human WDR44 family	1	3	3	3	2	2	2	2	2	2	4	4	4	103.69	933	933	0	5.1104	By MS/MS	By MS/MS	2.9	2.3	13742000	6112500	7629500	6112500	0	1	2	3				316	376;2362;4231	True;True;True	387;2418;4366	830;4952;4953;9197	784;4699;8738	784;4699;8738
SPBC11C11.09c|rpl502|II|60S;SPAC3H5.12c|rpl501|I|60S	SPBC11C11.09c|rpl502|II|60S;SPAC3H5.12c|rpl501|I|60S	5;5	5;5	5;5	>SPBC11C11.09c|rpl502|II|60S ribosomal protein L5;>SPAC3H5.12c|rpl501|I|60S ribosomal protein L5 (predicted)	2	5	5	5	5	3	5	3	5	3	31	31	31	33.485	294	294;294	0	15.951	By MS/MS	By MS/MS	31	21.8	186210000	119960000	66253000	95908000	86969000	7	3	10				317	1318;1421;1453;4789;4932	True;True;True;True;True	1353;1457;1489;4947;5095	2741;2742;3015;3075;3076;10416;10417;10700;10701	2588;2589;2840;2899;2900;9875;10159;10160;10161;10162	2589;2840;2900;9875;10160
SPAC3H8.02|csr102|I|sec14	SPAC3H8.02|csr102|I|sec14	1	1	1	>SPAC3H8.02|csr102|I|sec14 cytosolic factor family, glycerophospholipid-transfer protein Crs102 (predicted)	1	1	1	1	1	1	1	1	1	1	2	2	2	51.473	444	444	0	1.5989	By MS/MS	By MS/MS	2	2	5078600	2004500	3074100	0	2919400	1	1	2				318	2661	TRUE	2733	5573;5574	5301;5302	5301
SPAC3H8.10|spo20|I|sec14	SPAC3H8.10|spo20|I|sec14	2	2	2	>SPAC3H8.10|spo20|I|sec14 cytosolic factor family, glycerophospholipid-transfer protein Spo20/Sec14	1	2	2	2	1	1	1	1	1	1	9.8	9.8	9.8	32.746	286	286	0	2.1362	By MS/MS	By MS/MS	4.5	5.2	5863900	0	5863900	0	5568800	1	1	2				319	3630;3885	True;True	3749;4013	7898;8508	7520;8095	7520;8095
SPAC458.02c|SPAC458.02c|I|mRNP	SPAC458.02c|SPAC458.02c|I|mRNP	3	3	3	>SPAC458.02c|SPAC458.02c|I|mRNP complex (predicted)	1	3	3	3	1	3	1	3	1	3	7.9	7.9	7.9	53.735	468	468	0	6.6216	By MS/MS	By MS/MS	2.8	7.9	24530000	6424200	18105000	0	17194000	2	3	5				320	876;4190;4611	True;True;True	905;4325;4762	1833;1834;9125;10023	1735;1736;1737;8672;9513	1735;8672;9513
SPAC458.03|tel2|I|Tel2/Rad-5/Clk-2	SPAC458.03|tel2|I|Tel2/Rad-5/Clk-2	2	2	2	>SPAC458.03|tel2|I|Tel2/Rad-5/Clk-2 family protein Tel2	1	2	2	2	2	0	2	0	2	0	2.4	2.4	2.4	99.049	868	868	0	5.1017	By MS/MS	By matching	2.4	0	8504300	8504300	0	8504300	0	2	0	2				321	1140;2928	True;True	1172;3006	2365;6099	2232;5802	2232;5802
SPAC4A8.05c|myp2|I|myosin	SPAC4A8.05c|myp2|I|myosin	5	5	5	>SPAC4A8.05c|myp2|I|myosin II heavy chain Myo3	1	5	5	5	4	5	4	5	4	5	2.4	2.4	2.4	242.57	2104	2104	0	7.0449	By MS/MS	By MS/MS	1.9	2.4	61348000	27810000	33538000	20254000	25940000	4	5	9				322	1028;2396;2651;3681;4465	True;True;True;True;True	1059;2452;2723;3802;4609	2154;2155;5018;5019;5020;5021;5022;5556;5557;8000;8001;9706	2036;4765;4766;4767;4768;5286;7616;7617;9215	2036;4765;5286;7617;9215
SPAC4A8.06c|SPAC4A8.06c|I|esterase/lipase	SPAC4A8.06c|SPAC4A8.06c|I|esterase/lipase	1	1	1	>SPAC4A8.06c|SPAC4A8.06c|I|esterase/lipase (predicted)	1	1	1	1	1	0	1	0	1	0	1.9	1.9	1.9	66.109	578	578	0	1.9444	By MS/MS	By matching	1.9	0	0	0	0	0	0	1	0	1				323	3025	TRUE	3104	6286	5977	5977
SPAC4A8.11c|fas2|I|fatty	SPAC4A8.11c|fas2|I|fatty	33	33	33	>SPAC4A8.11c|fas2|I|fatty acid synthase alpha subunit Fas2	1	33	33	33	30	29	30	29	30	29	23.9	23.9	23.9	202.17	1842	1842	0	128.65	By MS/MS	By MS/MS	22.1	20.8	543130000	260330000	282810000	268450000	250390000	21	33	54				324	266;448;487;492;649;832;1077;1400;1401;1591;1624;1685;1793;2100;2185;2206;2323;2444;2492;2712;2797;3241;3566;4113;4272;4286;4292;4483;4555;4977;5147;5200;5301	True;True;True;True;True;True;True;True;True;True;True;True;True;True;True;True;True;True;True;True;True;True;True;True;True;True;True;True;True;True;True;True;True	275;462;502;507;670;861;1109;1436;1437;1628;1663;1727;1836;2146;2235;2258;2378;2379;2505;2557;2786;2871;3332;3333;3683;4246;4408;4423;4429;4627;4701;5140;5314;5368;5471	641;642;973;974;1052;1053;1062;1392;1393;1756;1757;2249;2250;2978;2979;2980;2981;3400;3401;3467;3468;3596;3813;4407;4408;4586;4634;4872;4873;5127;5128;5229;5230;5678;5679;5843;5844;5845;5846;6822;6823;6824;7746;7747;8974;8975;9278;9279;9303;9304;9313;9744;9745;9899;9900;10772;10773;11107;11108;11197;11198;11507;11508	602;603;910;911;986;993;1313;1663;2120;2121;2805;2806;2807;2808;2809;3201;3268;3269;3395;3615;4184;4347;4395;4620;4621;4866;4867;4961;5397;5398;5556;5557;5558;6481;6482;6483;7371;7372;7373;8536;8810;8811;8836;8837;8845;9253;9395;10233;10234;10557;10558;10646;10962;10963	602;910;986;993;1313;1663;2120;2806;2808;3201;3269;3395;3615;4184;4347;4395;4620;4867;4961;5398;5556;6482;7372;8536;8811;8837;8845;9253;9395;10234;10557;10646;10963	75;76;77	57;412;1246
SPAC4A8.12c|sds22|I|protein	SPAC4A8.12c|sds22|I|protein	1	1	1	>SPAC4A8.12c|sds22|I|protein phosphatase regulatory subunit Sds22	1	1	1	1	1	1	1	1	1	1	3	3	3	38.066	332	332	0	3.8858	By matching	By MS/MS	3	3	4869400	1590100	3279300	0	3114300	0	1	1				325	3061	TRUE	3141	6358;6359	6048	6048
SPAC4A8.16c|tif33|I|translation	SPAC4A8.16c|tif33|I|translation	9	9	9	>SPAC4A8.16c|tif33|I|translation initiation factor eIF3c	1	9	9	9	8	8	8	8	8	8	14.6	14.6	14.6	104.37	918	918	0	21.301	By MS/MS	By MS/MS	13.1	13.3	150820000	83536000	67285000	78680000	68756000	7	8	15				326	337;446;1570;2369;3079;3711;4103;4862;5123	True;True;True;True;True;True;True;True;True	348;460;1607;2425;3159;3833;4236;5023;5290	762;969;970;3362;3363;4966;6392;6393;8069;8070;8958;8959;10572;10573;11059;11060	720;907;3164;3165;4715;6079;6080;7680;7681;8522;8523;10030;10031;10508;10509	720;907;3164;4715;6079;7680;8522;10030;10508
SPAC4D7.05|sum1|I|translation	SPAC4D7.05|sum1|I|translation	8	8	8	>SPAC4D7.05|sum1|I|translation initiation factor eIF3i	1	8	8	8	8	6	8	6	8	6	32.3	32.3	32.3	36.811	328	328	0	28.024	By MS/MS	By MS/MS	32.3	24.7	381770000	276570000	105200000	227070000	149400000	9	7	16				327	447;1524;1690;2724;3247;3795;5130;5216	True;True;True;True;True;True;True;True	461;1560;1732;2798;3340;3920;5297;5385	971;972;3223;3224;3604;5702;5703;6837;8332;8333;11072;11073;11233;11234	908;909;3033;3034;3035;3036;3402;5419;6494;7937;7938;7939;10520;10521;10681;10682	908;3033;3402;5419;6494;7937;10521;10681
SPAC4D7.08c|ade4|I|amidophosphoribosyltransferase	SPAC4D7.08c|ade4|I|amidophosphoribosyltransferase	6	6	6	>SPAC4D7.08c|ade4|I|amidophosphoribosyltransferase Ade4	1	6	6	6	4	5	4	5	4	5	14.6	14.6	14.6	59.831	533	533	0	18.137	By MS/MS	By MS/MS	8.6	11.8	44634000	10896000	33738000	19038000	23898000	4	4	8				328	656;860;1664;1902;1972;3561	True;True;True;True;True;True	677;889;1704;1945;2017;3677	1402;1805;1806;3547;4033;4171;4172;7722;7723	1322;1710;3345;3827;3955;3956;7349;7350	1322;1710;3345;3827;3955;7350
SPAC4D7.09|tif223|I|translation	SPAC4D7.09|tif223|I|translation	2	2	2	>SPAC4D7.09|tif223|I|translation initiation factor eIF2B gamma subunit	1	2	2	2	1	2	1	2	1	2	6.8	6.8	6.8	50.461	458	458	0	6.2803	By MS/MS	By MS/MS	3.3	6.8	19414000	9201100	10213000	0	9699400	1	2	3				329	2613;5049	True;True	2683;5214	5470;5471;10910	5200;5201;10362	5200;10362
SPAC4D7.10c|spt20|I|SAGA	SPAC4D7.10c|spt20|I|SAGA	8	8	8	>SPAC4D7.10c|spt20|I|SAGA complex subunit Spt20	1	8	8	8	8	8	8	8	8	8	17.1	17.1	17.1	54.028	473	473	0	22.367	By MS/MS	By MS/MS	17.1	17.1	137690000	62376000	75309000	62141000	71755000	7	9	16				330	994;1022;1041;1430;2375;3004;3672;3704	True;True;True;True;True;True;True;True	1025;1053;1072;1466;2431;3083;3792;3826	2076;2077;2142;2143;2178;2179;3029;3030;4976;4977;6243;6244;7976;7977;8056;8057	1960;1961;2026;2056;2057;2855;2856;4725;4726;5934;5935;5936;7595;7596;7669;7670	1961;2026;2057;2856;4725;5936;7596;7669
SPAC4F10.10c|mnn9|I|mannosyltransferase	SPAC4F10.10c|mnn9|I|mannosyltransferase	3	3	3	>SPAC4F10.10c|mnn9|I|mannosyltransferase complex subunit, Anp family Mnn9 (predicted)	1	3	3	3	3	2	3	2	3	2	13.9	13.9	13.9	38.296	337	337	0	8.2362	By MS/MS	By MS/MS	13.9	10.1	23667000	13805000	9861900	11446000	11724000	2	3	5				331	595;3404;3433	True;True;True	614;3515;3544	1281;1282;7395;7460;7461	1206;1207;1208;7033;7096;7097	1206;7033;7097
SPAC4F10.11|spn1|I|mitotic	SPAC4F10.11|spn1|I|mitotic	1	1	1	>SPAC4F10.11|spn1|I|mitotic septin Spn1	1	1	1	1	1	0	1	0	1	0	1.9	1.9	1.9	53.737	469	469	0.0065288	1.138	By MS/MS	By matching	1.9	0	0	0	0	0	0	1	0	1				332	4936	TRUE	5099	10708	10169	10169
SPAC4F10.14c|btf3|I|nascent	SPAC4F10.14c|btf3|I|nascent	2	2	2	>SPAC4F10.14c|btf3|I|nascent polypeptide-associated complex beta subunit	1	2	2	2	1	2	1	2	1	2	26.5	26.5	26.5	16.202	151	151	0	17.023	By MS/MS	By MS/MS	14.6	26.5	9612900	5522700	4090200	0	3884400	1	2	3				333	375;4507	True;True	386;4652	829;9796;9797	783;9303;9304	783;9304
SPAC4F8.03|sdo1|I|SBDS	SPAC4F8.03|sdo1|I|SBDS	1	1	1	>SPAC4F8.03|sdo1|I|SBDS family ribosome maturation protein Sdo1 (predicted)	1	1	1	1	0	1	0	1	0	1	6.9	6.9	6.9	28.075	246	246	0.0085837	1.0542	By matching	By MS/MS	0	6.9	3326900	0	3326900	0	3159500	0	1	1				334	111	TRUE	118	355	329	329
SPAC4F8.07c|hxk2|I|hexokinase	SPAC4F8.07c|hxk2|I|hexokinase	15	15	15	>SPAC4F8.07c|hxk2|I|hexokinase 2	1	15	15	15	15	15	15	15	15	15	42	42	42	50.92	455	455	0	63.995	By MS/MS	By MS/MS	42	42	414670000	183400000	231260000	195240000	204350000	18	20	38				335	270;583;613;845;1346;1601;1602;2783;3160;3279;3351;3565;4704;4785;5223	True;True;True;True;True;True;True;True;True;True;True;True;True;True;True	279;602;632;874;1382;1639;1640;2857;3240;3382;3462;3682;4857;4942;4943;5392	648;649;1261;1262;1324;1325;1780;1781;2796;2797;2798;2799;3424;3425;3426;3427;5818;5819;6557;6558;6559;6935;6936;7283;7284;7744;7745;10248;10249;10408;10409;10410;11252;11253	609;610;1188;1189;1248;1249;1683;1684;1685;2639;2640;2641;2642;2643;3225;3226;3227;3228;3229;5531;5532;6233;6234;6235;6236;6590;6591;6592;6926;6927;7369;7370;9723;9724;9867;9868;9869;10698;10699	610;1189;1249;1685;2640;3226;3229;5531;6236;6590;6927;7369;9724;9868;10699	78	289
SPAC4F8.12c|spp42|I|U5	SPAC4F8.12c|spp42|I|U5	3	3	3	>SPAC4F8.12c|spp42|I|U5 snRNP complex subunit Spp42	1	3	3	3	2	2	2	2	2	2	1.2	1.2	1.2	274.55	2363	2363	0	2.342	By MS/MS	By MS/MS	0.9	0.9	12947000	7544800	5402600	0	5130700	1	2	3				336	2274;4720;5161	True;True;True	2329;4876;5328	4784;10285;11129;11130	4539;9757;10581	4539;9757;10581
SPAC4F8.14c|hcs1|I|3-hydroxy-3-methylglutaryl-CoA	SPAC4F8.14c|hcs1|I|3-hydroxy-3-methylglutaryl-CoA	3	3	3	>SPAC4F8.14c|hcs1|I|3-hydroxy-3-methylglutaryl-CoA synthase	1	3	3	3	1	3	1	3	1	3	8.7	8.7	8.7	49.238	447	447	0	8.27	By MS/MS	By MS/MS	4.3	8.7	17374000	9543800	7830000	0	7436000	1	3	4				337	2639;2909;5405	True;True;True	2709;2985;5578	5512;6059;6060;11736	5241;5761;5762;11171	5241;5761;11171
SPAC4G9.03|adk1|I|adenylate	SPAC4G9.03|adk1|I|adenylate	1	1	1	>SPAC4G9.03|adk1|I|adenylate kinase Adk1	1	1	1	1	1	0	1	0	1	0	5.9	5.9	5.9	24.375	220	220	0	1.6954	By MS/MS	By matching	5.9	0	2061800	2061800	0	2061800	0	1	0	1				338	5262	TRUE	5431	11427	10883	10883
SPAC4G9.08c|rpc2|I|DNA-directed	SPAC4G9.08c|rpc2|I|DNA-directed	1	1	1	>SPAC4G9.08c|rpc2|I|DNA-directed RNA polymerase III complex subunit Rpc2	1	1	1	1	1	1	1	1	1	1	1.2	1.2	1.2	130.24	1165	1165	0	2.0636	By MS/MS	By MS/MS	1.2	1.2	3521500	1845000	1676500	0	1592100	1	1	2				339	2280	TRUE	2335	4794;4795	4550;4551	4550
SPAC4G9.09c|arg11|I|N-acetyl-gamma-glutamyl-phosphate	SPAC4G9.09c|arg11|I|N-acetyl-gamma-glutamyl-phosphate	9	9	9	>SPAC4G9.09c|arg11|I|N-acetyl-gamma-glutamyl-phosphate reductase/acetylglutamate kinase	1	9	9	9	8	8	8	8	8	8	14.4	14.4	14.4	97.704	885	885	0	36.596	By MS/MS	By MS/MS	13.4	11.9	143810000	75665000	68150000	71449000	68936000	8	8	16				340	468;937;981;1810;3319;3430;4289;5255;5349	True;True;True;True;True;True;True;True;True	482;966;1011;1853;3428;3541;4426;5424;5521	1013;1014;1963;1964;2058;3853;3854;7207;7452;7453;9308;9309;11414;11415;11606;11607	950;951;1857;1858;1944;3653;3654;6859;7088;7089;8840;8841;10872;10873;11049;11050	950;1857;1944;3653;6859;7089;8841;10873;11049
SPAC4G9.16c|rpl901|I|60S	SPAC4G9.16c|rpl901|I|60S	3	3	2	>SPAC4G9.16c|rpl901|I|60S ribosomal protein L9	1	3	3	2	3	3	3	3	2	2	21.1	21.1	15.8	21.513	190	190	0	12.899	By MS/MS	By MS/MS	21.1	21.1	45070000	9158000	35912000	0	34105000	1	3	4				341	662;1268;4304	True;True;True	683;1303;4441	1411;1412;2646;2647;9337;9338;9339	1332;2502;2503;8870;8871	1332;2503;8871
SPAC4H3.10c|pyk1|I|pyruvate	SPAC4H3.10c|pyk1|I|pyruvate	31	31	31	>SPAC4H3.10c|pyk1|I|pyruvate kinase	1	31	31	31	29	30	29	30	29	30	65.2	65.2	65.2	55.514	509	509	0	162.81	By MS/MS	By MS/MS	65.2	65.2	3029400000	1405800000	1623600000	1384300000	1513400000	41	41	82				342	74;97;234;397;398;545;1464;1534;1677;1731;2024;2120;2386;2387;2415;3023;3269;3359;3607;3805;3806;3812;4143;4382;4383;4384;4428;4579;4656;4926;5384	True;True;True;True;True;True;True;True;True;True;True;True;True;True;True;True;True;True;True;True;True;True;True;True;True;True;True;True;True;True;True	81;104;243;409;410;561;1500;1570;1718;1719;1773;2069;2167;2442;2443;2473;3102;3371;3470;3726;3931;3932;3939;4276;4520;4521;4522;4569;4570;4727;4807;4808;5089;5556;5557	171;172;328;329;330;331;577;578;868;869;870;1179;3097;3098;3247;3248;3576;3577;3578;3579;3580;3683;3684;3685;4265;4266;4267;4268;4453;4454;4999;5000;5001;5057;5058;6283;6284;6909;6910;6911;6912;7297;7298;7851;7852;8355;8356;8357;8358;8359;8360;8377;8378;8379;8380;9031;9032;9489;9490;9491;9492;9493;9494;9495;9496;9497;9498;9605;9606;9607;9952;9953;10115;10116;10117;10118;10689;10690;11680;11681;11…	165;166;305;306;307;538;539;818;819;820;1108;2916;2917;2918;3058;3059;3373;3374;3375;3376;3377;3484;3485;3486;4044;4045;4046;4047;4226;4227;4748;4749;4750;4801;4802;5973;5974;6564;6565;6566;6567;6568;6569;6570;6571;6940;6941;7475;7476;7959;7960;7961;7962;7963;7978;7979;8585;8586;9017;9018;9019;9020;9021;9022;9023;9024;9025;9026;9027;9120;9121;9122;9443;9444;9595;9596;9597;9598;9599;10150;10151;11…	166;307;539;818;820;1108;2916;3059;3375;3484;4046;4227;4748;4750;4802;5973;6570;6941;7476;7961;7963;7979;8586;9018;9019;9023;9122;9444;9595;10150;11127	79;80;81;82	116;355;375;430
SPAC4H3.14c|rng8|I|contractile	SPAC4H3.14c|rng8|I|contractile	17	17	17	>SPAC4H3.14c|rng8|I|contractile ring myosin V regulator Rng8	1	17	17	17	15	17	15	17	15	17	52.2	52.2	52.2	39.799	345	345	0	159.75	By MS/MS	By MS/MS	50.1	52.2	629620000	285670000	343960000	319370000	280260000	15	19	34				343	80;535;829;872;873;1584;1768;2183;2226;2398;2464;2627;3090;3468;3694;4503;5016	True;True;True;True;True;True;True;True;True;True;True;True;True;True;True;True;True	87;551;858;901;902;1621;1811;2233;2278;2454;2526;2527;2697;3170;3581;3815;4648;5180;5181	180;181;1152;1153;1154;1155;1748;1749;1826;1827;1828;3391;3764;3765;4582;4583;4675;4676;5024;5025;5166;5167;5168;5169;5494;5495;6414;6415;7525;7526;8029;8030;9789;9790;10850;10851;10852	174;175;176;1082;1083;1084;1085;1654;1655;1728;1729;1730;3193;3563;3564;4344;4433;4434;4770;4771;4772;4904;4905;4906;5222;5223;6100;6101;7159;7160;7642;7643;9297;10304;10305	175;1085;1654;1729;1730;3193;3564;4344;4433;4772;4905;5223;6101;7160;7643;9297;10305	83;84	74;93
SPCP31B10.07|eft202|III|translation;SPAC513.01c|eft201|I|translation	SPCP31B10.07|eft202|III|translation;SPAC513.01c|eft201|I|translation	32;32	32;32	32;32	>SPCP31B10.07|eft202|III|translation elongation factor 2 (EF-2) Eft2,B;>SPAC513.01c|eft201|I|translation elongation factor 2 (EF-2) Eft2,A	2	32	32	32	31	30	31	30	31	30	43.8	43.8	43.8	93.23	842	842;842	0	165.33	By MS/MS	By MS/MS	43	40.5	1598200000	722240000	876010000	714090000	714710000	42	39	81				344	92;122;148;295;452;495;1032;1068;1291;1380;1535;1595;2025;2029;2039;2179;2180;2251;2252;2281;2363;2392;2394;2428;2641;3139;3191;3461;3993;4252;4664;4801	True;True;True;True;True;True;True;True;True;True;True;True;True;True;True;True;True;True;True;True;True;True;True;True;True;True;True;True;True;True;True;True	99;129;130;156;305;466;510;1063;1099;1100;1326;1416;1571;1633;2070;2074;2084;2228;2229;2230;2305;2306;2336;2419;2448;2450;2488;2711;3219;3271;3573;4126;4127;4387;4816;4960	207;208;373;374;375;376;419;692;693;981;982;1069;1070;1071;1072;2161;2162;2229;2230;2231;2688;2943;2944;3249;3250;3251;3412;3413;4269;4270;4271;4272;4278;4279;4293;4294;4572;4573;4574;4575;4576;4577;4729;4730;4731;4732;4796;4797;4954;4955;5011;5012;5014;5015;5016;5089;5090;5515;5516;5517;5518;6515;6630;6631;7511;7512;8727;8728;8729;8730;9233;9234;10131;10132;10445;10446	202;203;345;346;347;348;388;652;917;918;999;1000;2042;2043;2101;2102;2103;2104;2105;2540;2770;2771;3060;3061;3062;3212;3213;4048;4049;4050;4051;4052;4057;4058;4059;4072;4073;4074;4334;4335;4336;4337;4338;4339;4488;4489;4490;4491;4552;4553;4700;4701;4758;4759;4761;4762;4763;4829;4830;4831;5243;5244;5245;5246;5247;6194;6303;6304;7143;7144;7145;8297;8298;8299;8300;8301;8772;8773;9611;9612;9907;9908	202;345;388;652;918;1000;2042;2101;2540;2771;3062;3212;4051;4057;4074;4335;4338;4488;4490;4552;4700;4759;4762;4831;5244;6194;6303;7143;8301;8773;9611;9908	85;86;87;88;89	275;361;478;573;619
SPAC513.05|ams1|I|alpha-mannosidase	SPAC513.05|ams1|I|alpha-mannosidase	1	1	1	>SPAC513.05|ams1|I|alpha-mannosidase Ams1 (predicted)	1	1	1	1	0	1	0	1	0	1	1	1	1	122.44	1077	1077	0.0085929	1.0596	By matching	By MS/MS	0	1	0	0	0	0	0	0	1	1				345	3661	TRUE	3780	7952	7572	7572
SPAC521.03|SPAC521.03|I|short	SPAC521.03|SPAC521.03|I|short	4	4	4	>SPAC521.03|SPAC521.03|I|short chain dehydrogenase (predicted)	1	4	4	4	4	4	4	4	4	4	20.8	20.8	20.8	28.148	259	259	0	14.167	By MS/MS	By MS/MS	20.8	20.8	56672000	23621000	33051000	22187000	32822000	3	5	8				346	3405;3511;4039;5242	True;True;True;True	3516;3626;4172;5411	7396;7397;7619;7620;7621;8826;8827;11391;11392	7034;7035;7254;7255;7256;8393;8394;10849;10850	7035;7254;8394;10850
SPAC521.04c|sst1|I|calcium	SPAC521.04c|sst1|I|calcium	2	2	2	>SPAC521.04c|sst1|I|calcium permease (predicted)	1	2	2	2	2	1	2	1	2	1	2.6	2.6	2.6	98.857	881	881	0	11.054	By MS/MS	By MS/MS	2.6	1.4	18316000	13452000	4864300	13452000	0	2	1	3				347	534;1920	True;True	550;1964	1150;1151;4070	1080;1081;3861	1080;3861
SPAC56E4.03|SPAC56E4.03|I|aromatic	SPAC56E4.03|SPAC56E4.03|I|aromatic	5	5	5	>SPAC56E4.03|SPAC56E4.03|I|aromatic aminotransferase (predicted)	1	5	5	5	3	4	3	4	3	4	15	15	15	53.166	474	474	0	18.147	By MS/MS	By MS/MS	10.3	12.2	62950000	28212000	34738000	23457000	37745000	4	4	8				348	129;706;977;3601;4803	True;True;True;True;True	137;728;1007;3720;4962	388;1501;2048;2049;7839;7840;10448	358;1419;1935;1936;7463;7464;7465;9910	358;1419;1936;7463;9910
SPAC56E4.04c|cut6|I|acetyl-CoA/biotin	SPAC56E4.04c|cut6|I|acetyl-CoA/biotin	73	73	73	>SPAC56E4.04c|cut6|I|acetyl-CoA/biotin carboxylase	1	73	73	73	66	62	66	62	66	62	44	44	44	256.84	2280	2280	0	281.47	By MS/MS	By MS/MS	39.5	36.4	1931600000	887140000	1044400000	900260000	942700000	68	71	139				349	168;382;461;479;497;572;596;609;719;779;884;983;1009;1026;1120;1155;1304;1336;1366;1395;1396;1486;1596;1618;1663;1839;1977;2075;2077;2095;2103;2114;2269;2282;2289;2308;2310;2325;2347;2427;2679;2916;2945;2965;3024;3064;3244;3354;3363;3467;3470;3579;3745;3789;3843;3872;3902;3939;4225;4235;4352;4380;4394;4607;4683;4684;4956;4990;5027;5036;5042;5155;5186	True;True;True;True;True;True;True;True;True;True;True;True;True;True;True;True;True;True;True;True;True;True;True;True;True;True;True;True;True;True;True;True;True;True;True;True;True;True;True;True;True;True;True;True;True;True;True;True;True;True;True;True;True;True;True;True;True;True;True;True;True;True;True;True;True;True;True;True;True;True;True;True;True	176;393;475;494;512;591;615;628;742;806;913;1013;1014;1040;1057;1152;1187;1339;1372;1402;1431;1432;1522;1634;1656;1703;1882;2022;2120;2122;2141;2149;2150;2161;2324;2337;2344;2363;2365;2381;2403;2487;2753;2994;3024;3044;3103;3144;3337;3465;3474;3579;3580;3583;3698;3869;3914;3971;4000;4030;4071;4360;4370;4490;4518;4533;4758;4836;4837;5119;5153;5192;5201;5207;5322;5354	453;454;838;839;999;1000;1039;1040;1041;1074;1075;1236;1283;1284;1316;1317;1530;1658;1659;1853;1854;2061;2062;2116;2117;2148;2149;2150;2151;2327;2328;2392;2393;2394;2716;2717;2718;2719;2777;2832;2833;2834;2969;2970;2971;2972;3146;3147;3414;3415;3454;3545;3546;3909;3910;4180;4181;4356;4357;4360;4397;4398;4414;4415;4416;4441;4442;4775;4776;4777;4798;4812;4813;4846;4847;4850;4875;4876;4923;4924;5087…	419;792;793;934;935;974;975;1002;1003;1160;1209;1210;1240;1241;1444;1567;1758;1947;1948;2002;2003;2030;2031;2032;2033;2192;2193;2194;2259;2260;2261;2567;2568;2569;2623;2677;2678;2679;2795;2796;2797;2798;2962;2963;3214;3215;3256;3343;3344;3706;3707;3964;3965;4135;4136;4138;4174;4175;4190;4191;4192;4217;4531;4532;4554;4565;4566;4595;4596;4599;4623;4624;4672;4673;4827;4828;5332;5333;5778;5834;5835;5…	419;793;935;974;1002;1160;1210;1241;1444;1567;1758;1947;2003;2030;2194;2261;2567;2623;2677;2795;2797;2963;3214;3256;3344;3707;3965;4135;4138;4174;4191;4217;4532;4554;4566;4596;4599;4624;4672;4827;5333;5778;5834;5872;5975;6054;6490;6931;6948;7155;7164;7413;7767;7849;8027;8076;8125;8199;8729;8746;8961;9015;9045;9506;9651;9653;10203;10261;10327;10343;10353;10570;10620	90;91;92;93	190;355;999;1042
SPAC56F8.03|tif52|I|translation	SPAC56F8.03|tif52|I|translation	3	3	3	>SPAC56F8.03|tif52|I|translation initiation factor eIF5B Tif52 (predicted)	1	3	3	3	2	3	2	3	2	3	4.9	4.9	4.9	119.93	1079	1079	0	14.083	By MS/MS	By MS/MS	4.1	4.9	33731000	24665000	9065900	25419000	7855700	1	2	3				350	298;736;5420	True;True;True	308;760;5593	697;1570;1571;11761;11762	656;1483;11194	656;1483;11194
SPAC57A10.02|cdr2|I|serine/threonine	SPAC57A10.02|cdr2|I|serine/threonine	1	1	1	>SPAC57A10.02|cdr2|I|serine/threonine protein kinase Cdr2	1	1	1	1	1	1	1	1	1	1	1.9	1.9	1.9	85.971	775	775	0	3.1836	By matching	By MS/MS	1.9	1.9	14712000	8025600	6686200	0	6349700	0	1	1				351	3345	TRUE	3456	7273;7274	6919	6919
SPAC57A7.04c|pabp|I|mRNA	SPAC57A7.04c|pabp|I|mRNA	9	9	9	>SPAC57A7.04c|pabp|I|mRNA export shuttling protein	1	9	9	9	7	8	7	8	7	8	17.5	17.5	17.5	71.512	653	653	0	22.404	By MS/MS	By MS/MS	13.6	15.8	73032000	37195000	35837000	41943000	29286000	6	6	12				352	253;276;341;1382;1489;3253;3797;4929;5375	True;True;True;True;True;True;True;True;True	262;285;352;1418;1525;3349;3923;5092;5547	616;658;767;768;2947;2948;3152;3153;6857;8338;8339;10695;10696;11659;11660	577;618;725;726;2774;2775;2776;2968;2969;6513;7945;10155;11106;11107	577;618;726;2774;2968;6513;7945;10155;11106
SPAC57A7.08|pzh1|I|serine/threonine	SPAC57A7.08|pzh1|I|serine/threonine	5	5	5	>SPAC57A7.08|pzh1|I|serine/threonine protein phosphatase Pzh1	1	5	5	5	5	4	5	4	5	4	16.9	16.9	16.9	57.131	515	515	0	14.076	By MS/MS	By MS/MS	16.9	14.8	57984000	29233000	28751000	27029000	29509000	5	3	8				353	174;933;2253;2328;3764	True;True;True;True;True	182;962;2307;2384;3888	465;466;1955;1956;4733;4883;4884;4885;4886;8192;8193	430;431;1853;4492;4629;4630;7811;7812	431;1853;4492;4629;7811
SPAC57A7.10c|sec21|I|coatomer	SPAC57A7.10c|sec21|I|coatomer	19	19	19	>SPAC57A7.10c|sec21|I|coatomer gamma subunit Sec21 (predicted)	1	19	19	19	18	14	18	14	18	14	25.4	25.4	25.4	100.93	905	905	0	54.528	By MS/MS	By MS/MS	24.1	17.7	312270000	210180000	102090000	179450000	127680000	20	11	31				354	243;256;1078;1224;2121;2169;2184;3393;3631;3668;3914;4008;4123;4227;4293;4498;4818;5160;5306	True;True;True;True;True;True;True;True;True;True;True;True;True;True;True;True;True;True;True	252;265;1110;1257;2168;2218;2234;3504;3750;3788;4042;4141;4256;4362;4430;4643;4977;5327;5476	593;620;2251;2252;2532;4455;4456;4555;4556;4584;4585;7374;7375;7899;7900;7968;7969;8568;8757;8758;8995;8996;9191;9192;9314;9315;9781;9782;10478;10479;11128;11519	555;581;2122;2123;2395;4228;4229;4319;4320;4345;4346;7013;7521;7588;7589;8148;8326;8327;8552;8553;8733;8734;8846;8847;9288;9289;9290;9937;10579;10580;10973	555;581;2122;2395;4228;4320;4346;7013;7521;7589;8148;8327;8553;8733;8846;9288;9937;10580;10973	94	261
SPAC57A7.12|ssz1|I|heat	SPAC57A7.12|ssz1|I|heat	1	1	1	>SPAC57A7.12|ssz1|I|heat shock protein Ssz1 (predicted)	1	1	1	1	1	1	1	1	1	1	1.8	1.8	1.8	61.285	566	566	0	1.7223	By matching	By MS/MS	1.8	1.8	873980	343430	530550	0	503860	0	1	1				355	2170	TRUE	2219	4557;4558	4321	4321
SPAC589.06c|SPAC589.06c|I|pho88	SPAC589.06c|SPAC589.06c|I|pho88	1	1	1	>SPAC589.06c|SPAC589.06c|I|pho88 family protein (predicted)	1	1	1	1	0	1	0	1	0	1	7.9	7.9	7.9	21.742	202	202	0.001139	1.4399	By matching	By MS/MS	0	7.9	0	0	0	0	0	0	1	1				356	3911	TRUE	4039	8563	8143	8143
SPAC5H10.06c|adh4|I|alcohol	SPAC5H10.06c|adh4|I|alcohol	12	12	12	>SPAC5H10.06c|adh4|I|alcohol dehydrogenase Adh4	1	12	12	12	11	11	11	11	11	11	39.1	39.1	39.1	40.674	379	379	0	68.009	By MS/MS	By MS/MS	39.1	37.2	1016300000	515180000	501070000	527990000	463050000	12	13	25				357	517;532;584;943;1151;1538;2250;2283;2688;3540;3618;4215	True;True;True;True;True;True;True;True;True;True;True;True	532;548;603;972;1183;1574;2304;2338;2762;3656;3737;4350	1109;1146;1147;1263;1973;1974;1975;1976;2385;2386;3255;3256;3257;4726;4727;4728;4799;4800;5622;5623;5624;5625;7677;7678;7872;7873;9169;9170	1037;1077;1190;1866;1867;1868;2251;2252;3065;3066;4484;4485;4486;4487;4555;4556;5346;5347;5348;7308;7309;7497;7498;7499;8715;8716	1037;1077;1190;1867;2251;3065;4486;4555;5348;7309;7499;8715	95	354
SPAC5H10.10|SPAC5H10.10|I|NADPH	SPAC5H10.10|SPAC5H10.10|I|NADPH	5	5	5	>SPAC5H10.10|SPAC5H10.10|I|NADPH dehydrogenase (predicted)	1	5	5	5	1	5	1	5	1	5	18.4	18.4	18.4	44.983	392	392	0	18.985	By matching	By MS/MS	4.6	18.4	39129000	6001600	33128000	0	31461000	0	5	5				358	1164;1320;1744;3456;4213	True;True;True;True;True	1196;1355;1786;3567;4348	2413;2744;3715;7501;9165;9166	2279;2591;3515;7134;8712	2279;2591;3515;7134;8712
SPAC607.05|rpn9|I|19S	SPAC607.05|rpn9|I|19S	2	2	2	>SPAC607.05|rpn9|I|19S proteasome regulatory subunit Rpn9	1	2	2	2	1	1	1	1	1	1	7.9	7.9	7.9	43.457	381	381	0	2.0897	By MS/MS	By MS/MS	5	2.9	0	0	0	0	0	1	1	2				359	3449;3737	True;True	3560;3861	7490;8137	7124;7753	7124;7753
SPAC630.03|arp3|I|Arp2/3	SPAC630.03|arp3|I|Arp2/3	2	2	2	>SPAC630.03|arp3|I|Arp2/3 protein complex, actin-like protein subunit Arp3	1	2	2	2	2	1	2	1	2	1	7.3	7.3	7.3	47.373	427	427	0	9.1683	By MS/MS	By MS/MS	7.3	4.7	16281000	9251000	7030200	9251000	0	2	1	3				360	788;2729	True;True	815;2803	1674;5714;5715	1581;5428;5429	1581;5428
SPAC630.08c|erg25|I|C-4	SPAC630.08c|erg25|I|C-4	3	3	3	>SPAC630.08c|erg25|I|C-4 methylsterol oxidase Erg25 (predicted)	1	3	3	3	3	2	3	2	3	2	9.7	9.7	9.7	35.802	300	300	0	5.5322	By MS/MS	By MS/MS	9.7	5.3	45455000	22879000	22577000	22829000	21490000	3	2	5				361	2488;2664;5184	True;True;True	2553;2736;5352	5223;5579;5580;11168;11169	4955;5306;5307;10616;10617	4955;5307;10616
SPAC630.13c|tsc2|I|tuberin	SPAC630.13c|tsc2|I|tuberin	3	3	3	>SPAC630.13c|tsc2|I|tuberin	1	3	3	3	3	2	3	2	3	2	2.2	2.2	2.2	154.81	1339	1339	0	3.7712	By MS/MS	By MS/MS	2.2	1.4	7009800	5523500	1486300	5523500	0	3	2	5				362	2926;3725;4330	True;True;True	3004;3848;4467	6095;6096;8098;8099;9393	5798;5799;7709;7710;8925	5799;7709;8925
SPAC637.04|ypp1|I|cargo-transport	SPAC637.04|ypp1|I|cargo-transport	3	3	3	>SPAC637.04|ypp1|I|cargo-transport protein Ypp1 (predicted)	1	3	3	3	3	1	3	1	3	1	2.9	2.9	2.9	98.306	862	862	0	4.3283	By MS/MS	By MS/MS	2.9	0.9	7919900	5180400	2739500	5180400	0	3	1	4				363	503;2858;4121	True;True;True	518;2933;4254	1086;5962;5963;8992	1014;5668;5669;8549	1014;5668;8549
SPAC637.05c|vma2|I|V-type	SPAC637.05c|vma2|I|V-type	3	3	3	>SPAC637.05c|vma2|I|V-type ATPase V1 subunit B	1	3	3	3	2	3	2	3	2	3	9.1	9.1	9.1	55.841	503	503	0	6.6223	By MS/MS	By MS/MS	7.2	9.1	47543000	19432000	28111000	20720000	25408000	3	3	6				364	2221;4300;5047	True;True;True	2273;4437;5212	4665;9329;9330;9331;10907;10908	4422;8860;8861;8862;10359;10360	4422;8860;10359
SPAC637.07|moe1|I|translation	SPAC637.07|moe1|I|translation	4	4	4	>SPAC637.07|moe1|I|translation initiation factor eIF3d Moe1	1	4	4	4	3	2	3	2	3	2	9.7	9.7	9.7	62.636	567	567	0	9.3542	By MS/MS	By MS/MS	7.2	4.9	33897000	25960000	7936900	17937000	15560000	5	2	7				365	775;3478;4303;5178	True;True;True;True	802;3591;4440;5345	1648;1649;1650;1651;7546;9336;11157	1558;1559;1560;1561;7181;8868;8869;10608	1559;7181;8868;10608
SPAC637.13c|slm1|I|cytoskeletal	SPAC637.13c|slm1|I|cytoskeletal	1	1	1	>SPAC637.13c|slm1|I|cytoskeletal signaling protein Slm1 (predicted)	1	1	1	1	1	1	1	1	1	1	2	2	2	56.087	498	498	0	2.4084	By MS/MS	By MS/MS	2	2	1432500	695660	736890	0	699810	1	1	2				366	219	TRUE	227	546;547	511;512	512
SPAC644.11c|pkp1|I|mitochondrial	SPAC644.11c|pkp1|I|mitochondrial	1	1	1	>SPAC644.11c|pkp1|I|mitochondrial pyruvate dehydrogenase (lipoamide) kinase Pkp1 (predicted)	1	1	1	1	1	1	1	1	1	1	2.8	2.8	2.8	48.187	425	425	0	1.9091	By MS/MS	By matching	2.8	2.8	5051500	1903300	3148200	0	2989800	1	0	1				367	153	TRUE	161	427;428	395	395
SPAC644.13c|SPAC644.13c|I|Rab	SPAC644.13c|SPAC644.13c|I|Rab	1	1	1	>SPAC644.13c|SPAC644.13c|I|Rab GTPase binding (predicted)	1	1	1	1	1	0	1	0	1	0	7.1	7.1	7.1	25.309	225	225	0	2.7575	By MS/MS	By matching	7.1	0	5526700	5526700	0	5526700	0	1	0	1				368	196	TRUE	204	507	472	472
SPBC18H10.14|rps1601|II|40S;SPAC664.04c|rps1602|I|40S	SPBC18H10.14|rps1601|II|40S;SPAC664.04c|rps1602|I|40S	4;4	4;4	4;4	>SPBC18H10.14|rps1601|II|40S ribosomal protein S16 (predicted);>SPAC664.04c|rps1602|I|40S ribosomal protein S16 (predicted)	2	4	4	4	3	2	3	2	3	2	29.3	29.3	29.3	15.395	140	140;140	0	9.3236	By MS/MS	By MS/MS	18.6	24.3	71807000	14991000	56816000	0	53957000	3	2	5				369	290;1148;4931;5108	True;True;True;True	300;1180;5094;5274	683;2380;10699;11029;11030	644;2246;10158;10477;10478	644;2246;10158;10478
SPAC664.05|rpl13|I|60S	SPAC664.05|rpl13|I|60S	5	5	5	>SPAC664.05|rpl13|I|60S ribosomal protein L13 (predicted)	1	5	5	5	4	5	4	5	4	5	22.1	22.1	22.1	23.529	208	208	0	8.5181	By MS/MS	By MS/MS	20.2	22.1	42264000	15244000	27020000	16705000	24200000	4	3	7				370	1647;1648;1952;3613;3856	True;True;True;True;True	1686;1687;1996;3732;3984	3515;3516;3517;3518;4129;7865;7866;8455;8456	3315;3316;3317;3916;7490;7491;8046	3315;3317;3916;7491;8046
SPAC664.11|ssc1|I|mitochondrial	SPAC664.11|ssc1|I|mitochondrial	17	17	17	>SPAC664.11|ssc1|I|mitochondrial heat shock protein Hsp70	1	17	17	17	15	16	15	16	15	16	33.1	33.1	33.1	72.976	674	674	0	62.605	By MS/MS	By MS/MS	28.9	31.3	706870000	300930000	405950000	317390000	369060000	17	18	35				371	12;667;717;2322;2421;2757;3132;3315;3634;4191;4256;4374;4604;4643;4758;5091;5092	True;True;True;True;True;True;True;True;True;True;True;True;True;True;True;True;True	12;688;740;2377;2479;2831;3212;3424;3753;4326;4392;4512;4755;4794;4915;5257;5258	22;23;1423;1524;1525;1526;1527;4870;4871;5066;5766;5767;6500;6501;7198;7199;7200;7905;7906;9126;9249;9250;9475;9476;10010;10011;10086;10087;10088;10089;10090;10353;10354;10992;10993;10994;10995	22;23;1343;1438;1439;1440;1441;4619;4809;5479;5480;6180;6181;6850;6851;6852;7528;7529;8673;8785;8786;9005;9006;9499;9500;9571;9572;9573;9574;9820;9821;10441;10442;10443;10444	23;1343;1439;4619;4809;5479;6181;6850;7528;8673;8785;9005;9500;9573;9820;10441;10442
SPAC694.02|SPAC694.02|I|DEAD/DEAH	SPAC694.02|SPAC694.02|I|DEAD/DEAH	23	23	23	>SPAC694.02|SPAC694.02|I|DEAD/DEAH box helicase	1	23	23	23	17	17	17	17	17	17	18.6	18.6	18.6	195.06	1717	1717	0	56.855	By MS/MS	By MS/MS	12.7	14.3	194290000	98646000	95639000	100720000	88757000	19	16	35				372	15;434;822;941;1079;1254;1337;1414;1483;1904;1919;1961;2175;2769;2973;3118;3762;4202;4203;4508;4636;4660;4713	True;True;True;True;True;True;True;True;True;True;True;True;True;True;True;True;True;True;True;True;True;True;True	15;447;851;970;1111;1289;1373;1450;1519;1947;1963;2005;2224;2843;3052;3198;3886;4337;4338;4653;4787;4812;4868	26;945;1737;1970;2253;2621;2622;2778;2779;2780;2781;3003;3004;3139;3140;3141;4036;4068;4069;4145;4146;4565;4566;5786;5787;5788;5789;6186;6187;6469;8187;9145;9146;9798;10073;10124;10125;10270;10271	26;885;1645;1863;2124;2481;2624;2625;2626;2829;2830;2955;2956;2957;3830;3859;3860;3931;3932;4328;4329;5498;5499;5500;5501;5502;5882;6150;7805;8694;8695;8696;9305;9556;9605;9743;9744	26;885;1645;1863;2124;2481;2626;2829;2956;3830;3859;3931;4328;5499;5882;6150;7805;8694;8695;9305;9556;9605;9744
SPAC6B12.04c|SPAC6B12.04c|I|2-aminoadipate	SPAC6B12.04c|SPAC6B12.04c|I|2-aminoadipate	4	4	4	>SPAC6B12.04c|SPAC6B12.04c|I|2-aminoadipate transaminase (predicted)	1	4	4	4	2	3	2	3	2	3	9.7	9.7	9.7	47.569	421	421	0	7.8375	By MS/MS	By MS/MS	4.3	7.4	4780200	0	4780200	0	4539700	2	3	5				373	2046;2558;2573;3050	True;True;True;True	2091;2627;2643;3129	4305;5379;5408;6333;6334	4084;5110;5138;6025;6026	4084;5110;5138;6026
SPAC6B12.06c|rrg9|I|mitochondrial	SPAC6B12.06c|rrg9|I|mitochondrial	1	1	1	>SPAC6B12.06c|rrg9|I|mitochondrial genome maintenance protein Rrg9 (predicted)	1	1	1	1	0	1	0	1	0	1	10.3	10.3	10.3	13.827	117	117	0	2.7519	By matching	By MS/MS	0	10.3	259930000	0	259930000	0	246850000	0	1	1				374	3272	TRUE	3374	6917	6574	6574	96	1
SPAC6B12.07c|SPAC6B12.07c|I|ubiquitin-protein	SPAC6B12.07c|SPAC6B12.07c|I|ubiquitin-protein	3	3	3	>SPAC6B12.07c|SPAC6B12.07c|I|ubiquitin-protein ligase E3 (predicted)	1	3	3	3	3	2	3	2	3	2	9.6	9.6	9.6	53.403	470	470	0	10.167	By MS/MS	By MS/MS	9.6	7.7	18902000	11551000	7351400	9721200	8811200	3	3	6				375	1275;2677;4582	True;True;True	1310;2751;4730	2657;2658;5604;9956;9957	2512;2513;5330;9447;9448;9449	2513;5330;9447
SPAC6B12.12|tom70|I|mitochondrial	SPAC6B12.12|tom70|I|mitochondrial	3	3	3	>SPAC6B12.12|tom70|I|mitochondrial TOM complex subunit Tom70 (predicted)	1	3	3	3	2	2	2	2	2	2	7.4	7.4	7.4	69.516	625	625	0	2.7567	By MS/MS	By MS/MS	4.3	6.1	12304000	6591900	5711800	6591900	0	2	1	3				376	250;2960;4204	True;True;True	259;3039;4339	610;6166;6167;9147	572;5865;8697	572;5865;8697
SPAC6B12.14c|SPAC6B12.14c|I|conserved	SPAC6B12.14c|SPAC6B12.14c|I|conserved	2	2	2	>SPAC6B12.14c|SPAC6B12.14c|I|conserved fungal protein	1	2	2	2	2	2	2	2	2	2	15.6	15.6	15.6	17.397	154	154	0	6.3852	By MS/MS	By MS/MS	15.6	15.6	46332000	24394000	21938000	24296000	20933000	2	2	4				377	3324;5107	True;True	3433;5273	7218;7219;11027;11028	6870;6871;10475;10476	6871;10475
SPAC6B12.15|cpc2|I|RACK1	SPAC6B12.15|cpc2|I|RACK1	11	11	11	>SPAC6B12.15|cpc2|I|RACK1 ortholog Cpc2	1	11	11	11	11	11	11	11	11	11	52.9	52.9	52.9	34.851	314	314	0	39.83	By MS/MS	By MS/MS	52.9	52.9	716840000	344810000	372020000	322530000	358800000	12	13	25				378	436;617;669;1363;4030;4031;4201;4710;5103;5406;5424	True;True;True;True;True;True;True;True;True;True;True	449;636;637;690;1399;4163;4164;4336;4865;5269;5579;5597	948;949;1332;1333;1334;1426;1427;1428;1429;2826;2827;2828;8809;8810;8811;8812;9143;9144;10263;10264;11019;11020;11737;11738;11767;11768	888;889;1256;1257;1258;1259;1346;1347;1348;1349;2671;2672;2673;8373;8374;8375;8376;8692;8693;9735;9736;10467;10468;11172;11173;11201	889;1259;1349;2673;8373;8375;8693;9736;10468;11173;11201	97	217
SPAC6C3.04|cit1|I|citrate	SPAC6C3.04|cit1|I|citrate	4	4	4	>SPAC6C3.04|cit1|I|citrate synthase Cit1	1	4	4	4	4	3	4	3	4	3	9.1	9.1	9.1	54.16	483	483	0	12.742	By MS/MS	By MS/MS	9.1	6.4	34041000	18961000	15080000	18763000	14519000	4	4	8				379	1044;1408;4484;5094	True;True;True;True	1075;1444;4628;5260	2186;2992;2993;9746;9747;10999;11000;11001	2063;2820;2821;9254;9255;10448;10449;10450	2063;2821;9255;10449
SPAC6F12.05c|tnr3|I|thiamine	SPAC6F12.05c|tnr3|I|thiamine	2	2	2	>SPAC6F12.05c|tnr3|I|thiamine diphosphokinase Tnr3/ Nudix hydrolase fusion protein	1	2	2	2	2	2	2	2	2	2	6.2	6.2	6.2	64.235	569	569	0	6.1461	By MS/MS	By MS/MS	6.2	6.2	20974000	12146000	8828100	11307000	9223200	1	2	3				380	2088;2192	True;True	2134;2243	4382;4383;4601;4602	4156;4157;4361	4156;4361
SPAC6F12.08c|exo84|I|exocyst	SPAC6F12.08c|exo84|I|exocyst	4	4	4	>SPAC6F12.08c|exo84|I|exocyst complex subunit Exo84 (predicted)	1	4	4	4	3	3	3	3	3	3	6.7	6.7	6.7	68.592	584	584	0	10.858	By MS/MS	By MS/MS	6.7	3.9	20649000	16066000	4582500	11641000	8777600	3	3	6				381	2418;2493;4210;5033	True;True;True;True	2476;2558;4345;5198	5061;5062;5231;5232;9160;10886	4805;4806;4962;4963;8709;10339	4805;4962;8709;10339
SPAC6F12.10c|ade3|I|phosphoribosylformylglycinamidine	SPAC6F12.10c|ade3|I|phosphoribosylformylglycinamidine	11	11	11	>SPAC6F12.10c|ade3|I|phosphoribosylformylglycinamidine synthase Ade3 (predicted)	1	11	11	11	9	10	9	10	9	10	13.9	13.9	13.9	144.86	1323	1323	0	34.544	By MS/MS	By MS/MS	11.5	12.7	85980000	34645000	51334000	37831000	45566000	7	8	15				382	151;402;523;1264;1741;2040;2703;3886;4018;4317;4750	True;True;True;True;True;True;True;True;True;True;True	159;414;538;1299;1783;2085;2777;4014;4151;4454;4907	423;424;876;877;1120;1121;2640;3710;3711;4295;5654;5655;8509;8510;8782;8783;9369;10336;10337	392;825;1050;1051;2496;3510;3511;3512;4075;5373;5374;8096;8097;8348;8899;9804	392;825;1051;2496;3510;4075;5374;8097;8348;8899;9804
SPAC6F12.12|par2|I|protein	SPAC6F12.12|par2|I|protein	1	1	1	>SPAC6F12.12|par2|I|protein phosphatase PP2A regulatory subunit B-56 Par2	1	1	1	1	1	1	1	1	1	1	2.1	2.1	2.1	72.464	627	627	0	2.2879	By MS/MS	By MS/MS	2.1	2.1	3311500	3311500	0	3311500	0	1	1	2				383	2804	TRUE	2878	5856;5857	5569;5570	5569
SPAC6F12.13c|fps1|I|geranyltranstransferase	SPAC6F12.13c|fps1|I|geranyltranstransferase	3	3	3	>SPAC6F12.13c|fps1|I|geranyltranstransferase Fps1	1	3	3	3	2	2	2	2	2	2	10.7	10.7	10.7	39.516	347	347	0	4.2907	By MS/MS	By MS/MS	5.2	8.1	14127000	7660500	6466400	7660500	0	2	2	4				384	238;456;4019	True;True;True	247;470;4152	584;988;989;8784	545;924;925;8349	545;925;8349
SPAC6F12.15c|cut9|I|anaphase-promoting	SPAC6F12.15c|cut9|I|anaphase-promoting	3	3	3	>SPAC6F12.15c|cut9|I|anaphase-promoting complex, TPR lobe subcomplex subunit Cut9/Apc6	1	3	3	3	3	3	3	3	3	3	5.5	5.5	5.5	75.888	671	671	0	7.7209	By MS/MS	By MS/MS	5.5	5.5	19861000	10552000	9309000	13657000	5735900	3	2	5				385	261;1248;1655	True;True;True	270;1283;1695	631;632;2611;2612;3531;3532	592;2471;2472;3330;3331	592;2471;3331
SPAC6F6.07c|rps13|I|40S	SPAC6F6.07c|rps13|I|40S	4	4	4	>SPAC6F6.07c|rps13|I|40S ribosomal protein S13	1	4	4	4	4	4	4	4	4	4	25.8	25.8	25.8	16.953	151	151	0	10.923	By MS/MS	By MS/MS	25.8	25.8	182330000	84613000	97713000	84585000	92825000	4	4	8				386	40;1539;2770;4779	True;True;True;True	41;1575;2844;4936	78;79;3258;3259;5790;5791;10397;10398	75;76;3067;3068;5503;5504;9858;9859	75;3067;5504;9858
SPAC6F6.10c|arc2|I|ARP2/3	SPAC6F6.10c|arc2|I|ARP2/3	3	3	3	>SPAC6F6.10c|arc2|I|ARP2/3 actin-organizing complex subunit Arc34	1	3	3	3	2	3	2	3	2	3	10.7	10.7	10.7	36.974	317	317	0	19.404	By MS/MS	By MS/MS	6	10.7	25365000	7441300	17924000	0	17022000	2	3	5				387	3557;3844;4764	True;True;True	3673;3972;4921	7712;7713;8438;10368;10369	7340;7341;8028;9835;9836	7341;8028;9835
SPAC6F6.11c|SPAC6F6.11c|I|pyridoxine-pyridoxal-pyridoxamine	SPAC6F6.11c|SPAC6F6.11c|I|pyridoxine-pyridoxal-pyridoxamine	1	1	1	>SPAC6F6.11c|SPAC6F6.11c|I|pyridoxine-pyridoxal-pyridoxamine kinase (predicted)	1	1	1	1	0	1	0	1	0	1	4.5	4.5	4.5	33.998	309	309	0.0043812	1.1764	By matching	By MS/MS	0	4.5	1828900	0	1828900	0	1736800	0	1	1				388	132	TRUE	140	391	361	361
SPAC6G10.02c|tea3|I|cell	SPAC6G10.02c|tea3|I|cell	31	31	31	>SPAC6G10.02c|tea3|I|cell end marker Tea3	1	31	31	31	30	30	30	30	30	30	38	38	38	127.75	1125	1125	0	164.46	By MS/MS	By MS/MS	35.6	38	1366000000	667190000	698810000	638350000	692500000	33	33	66				389	263;507;531;753;895;1016;1043;1056;1299;1913;2020;2293;2401;2570;2600;2894;3045;3047;3465;3526;3529;3758;3982;4145;4316;4421;4593;4822;5127;5167;5334	True;True;True;True;True;True;True;True;True;True;True;True;True;True;True;True;True;True;True;True;True;True;True;True;True;True;True;True;True;True;True	272;522;547;777;924;1047;1074;1087;1334;1957;2065;2348;2457;2640;2670;2970;3124;3126;3577;3642;3645;3882;4115;4278;4453;4562;4743;4981;5294;5334;5505	635;636;637;1091;1092;1144;1145;1605;1606;1871;1872;2130;2131;2132;2133;2184;2185;2207;2208;2706;2707;4054;4055;4258;4259;4819;4820;5030;5401;5402;5450;5451;6031;6032;6033;6034;6325;6326;6329;6330;7518;7519;7650;7651;7656;7657;8180;8704;8705;9035;9036;9037;9038;9367;9368;9592;9593;9981;9982;10487;10488;11066;11067;11139;11140;11574;11575;11576;11577	595;596;597;1019;1020;1076;1518;1519;1775;2014;2015;2016;2017;2018;2061;2062;2082;2083;2557;2558;3847;3848;4037;4038;4572;4573;4574;4575;4776;5131;5132;5179;5180;5181;5735;5736;5737;6018;6019;6022;7151;7152;7283;7284;7288;7799;8275;8276;8588;8589;8590;8896;8897;8898;9109;9110;9472;9473;9946;9947;10515;10591;10592;11019;11020;11021;11022	595;1019;1076;1518;1775;2014;2061;2083;2558;3847;4038;4574;4776;5132;5179;5737;6018;6022;7152;7284;7288;7799;8275;8588;8896;9110;9473;9946;10515;10591;11019
SPAC6G10.03c|cld1|I|mitochondrial	SPAC6G10.03c|cld1|I|mitochondrial	3	3	3	>SPAC6G10.03c|cld1|I|mitochondrial cardiolipin-specific phospholipase Cld1 (predicted)	1	3	3	3	3	3	3	3	3	3	8.4	8.4	8.4	48.72	428	428	0	7.2018	By MS/MS	By MS/MS	8.4	8.4	35106000	15041000	20065000	15600000	18497000	3	2	5				390	1108;1208;2372	True;True;True	1140;1241;2428	2307;2308;2498;2499;4970;4971	2174;2364;2365;4719;4720	2174;2364;4719
SPAC6G10.05c|trs120|I|TRAPP	SPAC6G10.05c|trs120|I|TRAPP	9	9	9	>SPAC6G10.05c|trs120|I|TRAPP complex subunit Trs120 (predicted)	1	9	9	9	8	4	8	4	8	4	10.6	10.6	10.6	137.76	1210	1210	0	9.9516	By MS/MS	By MS/MS	9.6	4.2	40540000	28700000	11839000	21354000	18589000	8	2	10				391	1001;1165;2023;2041;3963;4228;4368;4998;5014	True;True;True;True;True;True;True;True;True	1032;1197;2068;2086;4095;4363;4506;5161;5178	2096;2414;4264;4296;8668;8669;9193;9194;9467;10813;10847;10848	1983;1984;2280;4043;4076;8241;8735;8997;10272;10302	1984;2280;4043;4076;8241;8735;8997;10272;10302
SPAC6G10.08|idp1|I|isocitrate	SPAC6G10.08|idp1|I|isocitrate	6	6	6	>SPAC6G10.08|idp1|I|isocitrate dehydrogenase Idp1 (predicted)	1	6	6	6	4	6	4	6	4	6	14.6	14.6	14.6	49.478	439	439	0	16.482	By MS/MS	By MS/MS	10	14.6	19047000	8284600	10763000	7786200	10720000	3	7	10				392	1918;2621;3157;3492;3937;4398	True;True;True;True;True;True	1962;2691;3237;3605;4069;4537	4066;4067;5484;6552;7572;7573;8619;8620;9524;9525;9526;9527	3858;5214;6229;7207;7208;8195;8196;9051;9052;9053	3858;5214;6229;7207;8196;9051
SPAC6G9.07c|arc4|I|ARP2/3	SPAC6G9.07c|arc4|I|ARP2/3	1	1	1	>SPAC6G9.07c|arc4|I|ARP2/3 actin-organizing complex subunit Arc4	1	1	1	1	1	1	1	1	1	1	7.7	7.7	7.7	19.614	168	168	0	3.9843	By MS/MS	By MS/MS	7.7	7.7	5622400	3085300	2537100	0	2409500	1	1	2				393	4159	TRUE	4292	9061;9062	8611;8612	8612
SPCC330.14c|rpl2402|III|60S;SPAC6G9.09c|rpl2401|I|60S	SPCC330.14c|rpl2402|III|60S;SPAC6G9.09c|rpl2401|I|60S	2;2	2;2	2;2	>SPCC330.14c|rpl2402|III|60S ribosomal protein L24 (predicted);>SPAC6G9.09c|rpl2401|I|60S ribosomal protein L24 (predicted)	2	2	2	2	2	2	2	2	2	2	12.8	12.8	12.8	16.912	149	149;149	0	2.8234	By MS/MS	By MS/MS	12.8	12.8	44843000	24328000	20515000	24154000	19656000	2	1	3				394	1571;3941	True;True	1608;4073	3364;3365;8627;8628	3166;3167;8203	3166;8203
SPAC750.01|SPAC750.01|I|aldo/keto;SPAC977.14c|SPAC977.14c|I|aldo/keto	SPAC750.01|SPAC750.01|I|aldo/keto;SPAC977.14c|SPAC977.14c|I|aldo/keto	2;2	2;2	2;2	>SPAC750.01|SPAC750.01|I|aldo/keto reductase family protein;>SPAC977.14c|SPAC977.14c|I|aldo/keto reductase, predicted calcium channel regulator	2	2	2	2	1	2	1	2	1	2	7.4	7.4	7.4	37.359	325	325;351	0	5.5896	By MS/MS	By MS/MS	3.7	7.4	7551200	0	7551200	0	7171300	1	2	3				395	2725;5224	True;True	2799;5393	5704;5705;11254	5420;5421;10700	5421;10700
SPAC767.01c|vps1|I|dynamin	SPAC767.01c|vps1|I|dynamin	27	27	27	>SPAC767.01c|vps1|I|dynamin family protein Vps1	1	27	27	27	25	25	25	25	25	25	41.7	41.7	41.7	75.79	678	678	0	124.74	By MS/MS	By MS/MS	39.7	40.1	1768100000	859030000	909120000	840710000	871590000	26	30	56				396	323;388;917;1093;1680;1932;1942;2160;2161;2189;2379;2507;2730;2874;3337;3555;3849;3850;4173;4232;4233;4381;4471;4719;4975;5084;5370	True;True;True;True;True;True;True;True;True;True;True;True;True;True;True;True;True;True;True;True;True;True;True;True;True;True;True	334;400;946;1125;1722;1976;1986;2209;2210;2240;2435;2573;2804;2949;3448;3671;3977;3978;4306;4367;4368;4519;4615;4874;4875;5138;5250;5542	736;737;738;848;849;1920;1921;1922;1923;2279;3587;3588;4090;4091;4108;4109;4540;4541;4542;4543;4595;4596;4984;4985;5258;5259;5716;5717;5993;5994;7254;7255;7256;7257;7708;7709;8446;8447;8448;9093;9198;9199;9200;9487;9488;9718;9719;10282;10283;10284;10769;10770;10979;10980;11649;11650	696;697;800;1818;1819;1820;1821;2147;3385;3386;3879;3880;3895;3896;4305;4306;4307;4308;4356;4357;4734;4735;4991;4992;5430;5431;5699;5700;5701;6902;6903;6904;6905;6906;7336;7337;8036;8037;8038;8642;8739;8740;9016;9226;9227;9228;9755;9756;10230;10231;10430;10431;11097;11098;11099;11100	697;800;1818;2147;3385;3879;3896;4305;4308;4357;4734;4992;5430;5700;6902;7336;8037;8038;8642;8739;8740;9016;9228;9755;10230;10431;11100	98	227
SPAC7D4.04|atg11|I|autophagy	SPAC7D4.04|atg11|I|autophagy	4	4	4	>SPAC7D4.04|atg11|I|autophagy protein Atg11	1	4	4	4	4	2	4	2	4	2	5.6	5.6	5.6	106.77	926	926	0	4.4174	By MS/MS	By MS/MS	5.6	3.6	16261000	13464000	2797400	13464000	0	4	3	7				397	3217;5021;5025;5218	True;True;True;True	3297;5186;5190;5387	6678;10860;10870;10871;11239;11240	6346;10312;10322;10323;10324;10686;10687	6346;10312;10322;10686
SPAC7D4.07c|trx1|I|cytosolic	SPAC7D4.07c|trx1|I|cytosolic	4	4	4	>SPAC7D4.07c|trx1|I|cytosolic thioredoxin Trx1	1	4	4	4	3	4	3	4	3	4	47.6	47.6	47.6	11.297	103	103	0	15.051	By MS/MS	By MS/MS	47.6	47.6	87775000	42124000	45652000	44631000	40848000	2	4	6				398	2010;3350;3801;4728	True;True;True;True	2055;3461;3927;4885	4241;7281;7282;8348;8349;10300;10301	4021;4022;6925;7953;7954;9771	4022;6925;7953;9771
SPAC806.02c|SPAC806.02c|I|Par	SPAC806.02c|SPAC806.02c|I|Par	1	1	1	>SPAC806.02c|SPAC806.02c|I|Par A family ATPase/WD repeat iron cluster assembly fusion protein (predicted)	1	1	1	1	1	1	1	1	1	1	2.3	2.3	2.3	67.68	608	608	0.0086022	1.0753	By matching	By MS/MS	2.3	2.3	3360400	1399800	1960500	0	1861900	0	1	1				399	2430	TRUE	2490	5092;5093	4833	4833
SPAC806.04c|SPAC806.04c|I|protein-glutamate	SPAC806.04c|SPAC806.04c|I|protein-glutamate	2	2	2	>SPAC806.04c|SPAC806.04c|I|protein-glutamate O-methyltransferase (predicted)	1	2	2	2	1	1	1	1	1	1	4.6	4.6	4.6	49.894	438	438	0	3.1219	By MS/MS	By MS/MS	1.6	3	2800700	0	2800700	0	2659800	1	1	2				400	2273;4377	True;True	2328;4515	4783;9481	4538;9009	4538;9009
SPAC821.03c|slf1|I|cell	SPAC821.03c|slf1|I|cell	1	1	1	>SPAC821.03c|slf1|I|cell cortex node protein Slf1	1	1	1	1	1	1	1	1	1	1	2.9	2.9	2.9	53.991	485	485	0	1.7198	By MS/MS	By MS/MS	2.9	2.9	9139600	4822700	4316900	0	4099700	1	1	2				401	1407	TRUE	1443	2990;2991	2818;2819	2819
SPAC821.05|tif38|I|translation	SPAC821.05|tif38|I|translation	5	5	5	>SPAC821.05|tif38|I|translation initiation factor eIF3h (p40)	1	5	5	5	5	4	5	4	5	4	21	21	21	39.78	357	357	0	13.141	By MS/MS	By MS/MS	21	17.4	71870000	25513000	46357000	31154000	38384000	4	5	9				402	5;500;2816;4632;4741	True;True;True;True;True	5;515;2890;4783;4898	9;10;1080;1081;5879;5880;10066;10067;10322	9;10;1008;1009;5594;5595;9550;9551;9552;9790	9;1009;5594;9551;9790
SPAC821.06|spn2|I|mitotic	SPAC821.06|spn2|I|mitotic	3	3	3	>SPAC821.06|spn2|I|mitotic and meiotic (sporulation) septin Spn2	1	3	3	3	2	3	2	3	2	3	11.5	11.5	11.5	38.129	331	331	0	5.4949	By MS/MS	By MS/MS	7.6	11.5	14681000	7475500	7205700	0	6843200	1	3	4				403	3096;3431;3784	True;True;True	3176;3542;3909	6425;7454;7455;8229;8230	6108;7090;7840;7841;7842	6108;7090;7842
SPAC821.10c|sod1|I|superoxide	SPAC821.10c|sod1|I|superoxide	1	1	1	>SPAC821.10c|sod1|I|superoxide dismutase Sod1	1	1	1	1	1	1	1	1	1	1	12.3	12.3	12.3	15.912	154	154	0	3.3303	By MS/MS	By matching	12.3	12.3	10105000	5350200	4755100	5350200	0	2	0	2				404	4595	TRUE	4746	9987;9988;9989	9477;9478	9478
SPAC821.11|pro1|I|gamma-glutamyl	SPAC821.11|pro1|I|gamma-glutamyl	4	4	4	>SPAC821.11|pro1|I|gamma-glutamyl phosphate reductase Pro1 (predicted)	1	4	4	4	3	3	3	3	3	3	10.4	10.4	10.4	48.706	451	451	0	5.8471	By MS/MS	By MS/MS	8.2	7.1	16116000	5597900	10518000	0	9989100	2	2	4				405	1888;3943;4065;4969	True;True;True;True	1931;4075;4198;5132	4010;8630;8885;8886;10758;10759	3800;8205;8451;8452;10221	3800;8205;8451;10221
SPAC823.03|ppk15|I|serine/threonine	SPAC823.03|ppk15|I|serine/threonine	6	6	6	>SPAC823.03|ppk15|I|serine/threonine protein kinase Ppk15 (predicted)	1	6	6	6	5	5	5	5	5	5	16.3	16.3	16.3	61.49	534	534	0	25.193	By MS/MS	By MS/MS	13.1	13.3	56065000	34417000	21649000	26593000	28383000	5	5	10				406	1909;2567;4004;4017;4474;5329	True;True;True;True;True;True	1952;2637;4137;4150;4618;5500	4042;4043;5396;5397;8748;8781;9726;9727;11567;11568	3836;3837;5126;5127;8319;8347;9235;9236;11013;11014	3837;5127;8319;8347;9235;11014
SPAC823.11|sgp1|I|sphingosine-1-phosphate	SPAC823.11|sgp1|I|sphingosine-1-phosphate	1	1	1	>SPAC823.11|sgp1|I|sphingosine-1-phosphate phosphatase	1	1	1	1	0	1	0	1	0	1	1.9	1.9	1.9	46.846	411	411	0.0065147	1.1237	By matching	By MS/MS	0	1.9	0	0	0	0	0	0	1	1				407	974	TRUE	1004	2043	1930	1930
SPAC823.12|vps11|I|HOPs/CORVET	SPAC823.12|vps11|I|HOPs/CORVET	3	3	3	>SPAC823.12|vps11|I|HOPs/CORVET complex biquitin protein ligase E3 subunit Vps11 (predicted)	1	3	3	3	2	2	2	2	2	2	3.4	3.4	3.4	102.52	906	906	0	4.382	By MS/MS	By MS/MS	2	2.5	5977200	1272200	4705000	0	4468300	2	2	4				408	769;2786;2857	True;True;True	795;2860;2932	1635;1636;5824;5961	1547;1548;5538;5667	1548;5538;5667
SPAC824.07|glo2|I|glyoxalase	SPAC824.07|glo2|I|glyoxalase	1	1	1	>SPAC824.07|glo2|I|glyoxalase II	1	1	1	1	1	1	1	1	1	1	5.1	5.1	5.1	28.483	256	256	0	1.5817	By MS/MS	By MS/MS	5.1	5.1	13282000	5801200	7480800	0	7104400	1	1	2				409	1374	TRUE	1410	2849;2850	2692;2693	2693
SPAC890.02c|alp7|I|centrosomal	SPAC890.02c|alp7|I|centrosomal	16	16	16	>SPAC890.02c|alp7|I|centrosomal transforming acidic coiled-coil (TACC) protein ortholog Alp7	1	16	16	16	15	14	15	14	15	14	45.1	45.1	45.1	53.175	474	474	0	73.907	By MS/MS	By MS/MS	45.1	41.6	363590000	240100000	123500000	216480000	140900000	17	15	32				410	2279;2496;2527;2860;3008;3009;3113;3138;3489;3509;3551;3641;3782;3915;3945;5230	True;True;True;True;True;True;True;True;True;True;True;True;True;True;True;True	2334;2561;2595;2935;3087;3088;3193;3218;3602;3624;3667;3760;3907;4043;4077;5399	4792;4793;5236;5237;5308;5309;5966;6252;6253;6254;6255;6460;6461;6513;6514;7567;7568;7614;7615;7616;7697;7698;7699;7700;7917;7918;8226;8569;8633;8634;11363;11364	4547;4548;4549;4967;4968;4969;5041;5042;5043;5672;5943;5944;5945;5946;6143;6144;6192;6193;7203;7204;7249;7250;7251;7327;7328;7329;7540;7837;8149;8208;8209;10821	4549;4968;5041;5672;5943;5945;6143;6193;7203;7250;7327;7540;7837;8149;8208;10821	99	420
SPAC890.06|nup155|I|nucleoporin	SPAC890.06|nup155|I|nucleoporin	1	1	1	>SPAC890.06|nup155|I|nucleoporin Nup155	1	1	1	1	1	0	1	0	1	0	1.7	1.7	1.7	147.63	1315	1315	0	1.5741	By MS/MS	By matching	1.7	0	4420100	4420100	0	4420100	0	1	0	1				411	165	TRUE	173	448	414	414
SPAC890.08|rpl31|I|60S	SPAC890.08|rpl31|I|60S	2	2	2	>SPAC890.08|rpl31|I|60S ribosomal protein L31 (predicted)	1	2	2	2	2	2	2	2	2	2	24.8	24.8	24.8	13.261	113	113	0	8.2607	By MS/MS	By MS/MS	24.8	24.8	47746000	22588000	25157000	22865000	23615000	1	2	3				412	3206;3906	True;True	3286;4034	6658;6659;8550;8551	6329;6330;8131	6329;8131
SPAC8C9.04|SPAC8C9.04|I|Schizosaccharomyces	SPAC8C9.04|SPAC8C9.04|I|Schizosaccharomyces	1	1	1	>SPAC8C9.04|SPAC8C9.04|I|Schizosaccharomyces specific protein	1	1	1	1	1	0	1	0	1	0	2.9	2.9	2.9	67.035	647	647	0.0044101	1.2176	By MS/MS	By matching	2.9	0	2520200	2520200	0	2520200	0	1	0	1				413	3876	TRUE	4004	8494	8082	8082
SPAC8C9.14|prr1|I|transcription	SPAC8C9.14|prr1|I|transcription	23	23	23	>SPAC8C9.14|prr1|I|transcription factor Prr1	1	23	23	23	23	23	23	23	23	23	58.3	58.3	58.3	60.045	539	539	0	323.31	By MS/MS	By MS/MS	58.3	58.3	4871700000	2248400000	2623300000	2150900000	2279400000	32	31	63				414	414;570;686;691;1338;1653;1770;1771;1885;2153;2154;2436;2470;2673;3108;3414;3448;3629;3718;3724;3752;3962;5006	True;True;True;True;True;True;True;True;True;True;True;True;True;True;True;True;True;True;True;True;True;True;True	426;427;587;588;589;707;712;713;1374;1693;1813;1814;1928;2202;2203;2496;2497;2533;2746;2747;3188;3525;3559;3748;3840;3841;3847;3876;4094;5169	902;903;904;1228;1229;1230;1231;1232;1233;1463;1464;1472;1473;1474;1475;1476;2782;2783;3526;3527;3528;3770;3771;3772;3773;3774;3775;4004;4005;4523;4524;4525;4526;4527;4528;4529;4530;5105;5106;5107;5108;5109;5110;5180;5181;5597;5598;5599;6450;6451;7422;7423;7487;7488;7489;7896;7897;8081;8082;8083;8084;8085;8086;8096;8097;8166;8167;8666;8667;10831;10832	846;847;1155;1156;1157;1158;1384;1392;1393;1394;1395;2627;2628;3324;3325;3326;3327;3328;3569;3570;3571;3572;3573;3574;3575;3794;3795;4292;4293;4294;4295;4296;4843;4844;4845;4846;4847;4848;4849;4850;4851;4917;4918;5324;5325;5326;6133;6134;7056;7057;7122;7123;7518;7519;7692;7693;7694;7695;7696;7697;7708;7784;7785;8239;8240;10289	847;1158;1384;1392;2627;3327;3570;3573;3795;4294;4296;4847;4917;5326;6134;7056;7123;7518;7692;7708;7784;8240;10289	100;101;102;103;104;105;106;107	17;174;197;351;354;495;521;526
SPAC8C9.15c|tif225|I|translation	SPAC8C9.15c|tif225|I|translation	1	1	1	>SPAC8C9.15c|tif225|I|translation initiation factor eIF2B epsilon subunit	1	1	1	1	1	0	1	0	1	0	1.3	1.3	1.3	76.325	678	678	0	1.841	By MS/MS	By matching	1.3	0	1353300	1353300	0	1353300	0	1	0	1				415	3878	TRUE	4006	8497	8085	8085
SPAC8E11.02c|rad24|I|14-3-3	SPAC8E11.02c|rad24|I|14-3-3	6	5	5	>SPAC8E11.02c|rad24|I|14-3-3 protein Rad24	1	6	5	5	6	5	5	4	5	4	31.5	27.8	27.8	30.082	270	270	0	22.63	By MS/MS	By MS/MS	31.5	26.3	224670000	102390000	122280000	118050000	100470000	6	5	11				416	31;754;1844;2353;3700;4270	True;False;True;True;True;True	32;778;779;1887;2409;3822;4406	61;62;63;64;1607;1608;1609;3918;3919;4933;4934;8045;8046;9275	61;62;63;64;1520;1521;1522;3715;3716;4681;4682;7658;7659;7660;8807	64;1521;3715;4682;7658;8807	42	223
SPAC8E11.10|SPAC8E11.10|I|sorbose	SPAC8E11.10|SPAC8E11.10|I|sorbose	3	3	3	>SPAC8E11.10|SPAC8E11.10|I|sorbose reductase (predicted)	1	3	3	3	3	3	3	3	3	3	16.9	16.9	16.9	27.437	255	255	0	13.684	By MS/MS	By MS/MS	16.9	16.9	155140000	52842000	102300000	53314000	96679000	3	3	6				417	99;249;3894	True;True;True	106;258;4022	334;335;608;609;8526;8527	310;311;570;571;8109;8110	310;570;8109
SPAC9.03c|brr2|I|U5	SPAC9.03c|brr2|I|U5	48	48	48	>SPAC9.03c|brr2|I|U5 snRNP complex subunit Brr2	1	48	48	48	42	40	42	40	42	40	25.9	25.9	25.9	248.81	2176	2176	0	141.24	By MS/MS	By MS/MS	25	22.6	776150000	431340000	344810000	408320000	350480000	45	36	81				418	57;84;199;200;258;339;538;663;677;862;922;1192;1365;1573;1597;1825;1877;1879;2018;2191;2242;2361;2385;2494;2587;2782;2838;3081;3147;3154;3155;3192;3505;3645;3686;3755;3866;4138;4154;4658;4768;4965;5034;5083;5118;5176;5244;5245	True;True;True;True;True;True;True;True;True;True;True;True;True;True;True;True;True;True;True;True;True;True;True;True;True;True;True;True;True;True;True;True;True;True;True;True;True;True;True;True;True;True;True;True;True;True;True;True	61;91;207;208;267;350;554;684;698;891;951;1224;1401;1610;1635;1868;1920;1922;2063;2242;2296;2417;2441;2559;2657;2856;2913;3161;3227;3234;3235;3272;3620;3764;3807;3879;3994;4271;4287;4810;4925;5128;5199;5249;5285;5343;5413;5414	122;123;188;189;512;513;623;624;625;626;765;1162;1163;1413;1414;1447;1448;1808;1931;1932;2471;2472;2830;2831;3370;3371;3416;3417;3881;3882;3991;3994;3995;4254;4255;4599;4600;4711;4712;4950;4951;4997;4998;5233;5234;5431;5432;5814;5815;5816;5817;5917;5918;6396;6397;6529;6530;6547;6548;6549;6632;7606;7607;7608;7924;7925;8011;8012;8172;8173;8479;9022;9023;9051;9052;10121;10375;10376;10752;10753;10887…	120;121;184;185;186;476;477;584;585;586;587;723;1091;1333;1334;1370;1712;1829;1830;2335;2675;2676;3173;3216;3217;3679;3680;3780;3783;3784;4034;4360;4468;4469;4697;4698;4746;4747;4964;4965;5160;5161;5528;5529;5530;5631;6083;6084;6207;6208;6224;6225;6226;6305;7242;7243;7244;7546;7547;7626;7627;7790;7791;8067;8577;8578;8601;8602;9601;9841;9842;10215;10216;10340;10428;10429;10495;10496;10605;10852;10…	121;186;476;477;584;723;1091;1334;1370;1712;1830;2335;2675;3173;3217;3680;3780;3784;4034;4360;4469;4698;4746;4965;5160;5528;5631;6083;6208;6224;6225;6305;7244;7547;7627;7791;8067;8578;8602;9601;9842;10216;10340;10428;10496;10605;10853;10854
SPAC9.07c|SPAC9.07c|I|GTPase	SPAC9.07c|SPAC9.07c|I|GTPase	2	2	2	>SPAC9.07c|SPAC9.07c|I|GTPase Rbg1 (predicted)	1	2	2	2	1	2	1	2	1	2	9.3	9.3	9.3	40.375	366	366	0	4.3932	By MS/MS	By MS/MS	5.5	9.3	15046000	5253500	9792600	0	9299900	1	3	4				419	1514;2235	True;True	1550;2288	3204;3205;4696	3018;3019;4451;4452	3019;4451
SPAC9.09|met26|I|homocysteine	SPAC9.09|met26|I|homocysteine	39	39	39	>SPAC9.09|met26|I|homocysteine methyltransferase Met26	1	39	39	39	37	38	37	38	37	38	55	55	55	85.339	764	764	0	134.98	By MS/MS	By MS/MS	52.2	53.7	3322000000	1558300000	1763700000	1507000000	1667200000	41	41	82				420	19;36;87;98;252;358;502;574;575;623;848;938;1064;1332;1333;1593;1594;1607;1621;1672;1733;2575;2774;2865;2872;2873;2974;3052;3092;3322;3814;3895;4844;4968;5000;5001;5125;5133;5135	True;True;True;True;True;True;True;True;True;True;True;True;True;True;True;True;True;True;True;True;True;True;True;True;True;True;True;True;True;True;True;True;True;True;True;True;True;True;True	20;37;94;105;261;369;517;593;594;643;877;967;1095;1368;1369;1631;1632;1645;1659;1713;1775;2645;2848;2940;2947;2948;3053;3131;3132;3172;3431;3941;4023;5005;5131;5163;5164;5292;5300;5302	33;71;72;194;195;332;333;612;613;614;615;798;1084;1085;1238;1239;1240;1241;1347;1348;1784;1785;1965;1966;2222;2769;2770;2771;2772;3406;3407;3408;3409;3410;3411;3435;3436;3459;3460;3567;3568;3690;3691;5411;5412;5798;5799;5800;5974;5975;5988;5989;5990;5991;5992;6188;6189;6190;6191;6336;6337;6338;6339;6418;6419;7212;7213;8383;8384;8385;8528;8529;10537;10538;10756;10757;10816;10817;10818;10819;10820;…	31;69;70;191;192;308;309;574;575;576;756;1012;1013;1162;1163;1164;1165;1166;1269;1270;1688;1689;1859;2096;2616;2617;2618;3206;3207;3208;3209;3210;3211;3236;3237;3260;3261;3366;3367;3491;3492;5141;5142;5511;5512;5513;5514;5680;5681;5695;5696;5697;5698;5883;5884;5885;5886;6028;6029;6030;6031;6103;6863;6864;7982;7983;7984;8111;8112;9996;10219;10220;10275;10276;10277;10278;10279;10511;10512;10528;105…	31;70;192;309;575;756;1012;1163;1164;1269;1688;1859;2096;2616;2617;3206;3210;3236;3261;3366;3491;5142;5512;5681;5696;5698;5886;6029;6103;6863;7983;8111;9996;10220;10276;10279;10511;10529;10532	108	97
SPAC9.10|thi9|I|thiamine	SPAC9.10|thi9|I|thiamine	2	2	2	>SPAC9.10|thi9|I|thiamine transmembrane transporter Thi9	1	2	2	2	2	1	2	1	2	1	4.1	4.1	4.1	65.069	591	591	0	2.5161	By MS/MS	By MS/MS	4.1	1.5	11804000	9674600	2129000	9674600	0	2	1	3				421	1091;3248	True;True	1123;3341	2276;6838;6839	2144;6495;6496	2144;6495
SPAC9.13c|cwf16|I|splicing	SPAC9.13c|cwf16|I|splicing	1	1	1	>SPAC9.13c|cwf16|I|splicing factor Cwf16	1	1	1	1	1	1	1	1	1	1	4.4	4.4	4.4	31.653	270	270	0.0086207	1.0887	By MS/MS	By matching	4.4	4.4	78066000	32691000	45375000	0	43092000	1	0	1				422	3001	TRUE	3080	6235;6236	5927	5927
SPAC926.04c|hsp90|I|Hsp90	SPAC926.04c|hsp90|I|Hsp90	42	42	42	>SPAC926.04c|hsp90|I|Hsp90 chaperone	1	42	42	42	40	41	40	41	40	41	59.4	59.4	59.4	80.595	704	704	0	323.31	By MS/MS	By MS/MS	57.8	58.9	5225300000	2251100000	2974200000	2173500000	2825400000	53	62	115				423	210;366;520;603;604;674;767;866;946;978;979;1085;1112;1123;1180;1728;1789;1882;2011;2012;2329;2405;2475;2670;2707;3318;3399;3488;3633;3819;3858;4114;4165;4166;4290;4397;4412;4762;4863;5359;5380;5381	True;True;True;True;True;True;True;True;True;True;True;True;True;True;True;True;True;True;True;True;True;True;True;True;True;True;True;True;True;True;True;True;True;True;True;True;True;True;True;True;True;True	218;377;535;622;623;695;793;895;975;1008;1009;1117;1144;1155;1212;1770;1832;1925;2056;2057;2385;2462;2463;2538;2742;2743;2781;3427;3510;3601;3752;3946;3986;4247;4298;4299;4427;4536;4553;4919;5024;5531;5552;5553	532;533;812;813;1114;1115;1305;1306;1307;1308;1439;1440;1441;1442;1633;1815;1816;1984;1985;2050;2051;2052;2053;2054;2055;2262;2263;2313;2314;2333;2334;2442;3677;3678;3807;3808;3999;4000;4242;4243;4244;4245;4887;4888;4889;4890;5038;5039;5040;5041;5191;5192;5589;5590;5591;5592;5664;5665;5666;5667;5668;5669;7205;7206;7386;7387;7563;7564;7565;7566;7903;7904;8393;8394;8461;8462;8976;8977;9074;9075;907…	498;499;766;767;1042;1043;1044;1045;1231;1232;1233;1234;1360;1361;1362;1363;1364;1365;1366;1545;1718;1719;1873;1874;1937;1938;1939;1940;1941;2131;2132;2179;2199;2200;2305;2306;3479;3480;3609;3610;3789;3790;4023;4024;4025;4631;4632;4633;4634;4635;4636;4783;4784;4785;4786;4928;5316;5317;5318;5319;5320;5382;5383;5384;5385;5386;5387;5388;6857;6858;7023;7024;7199;7200;7201;7202;7524;7525;7526;7527;798…	498;767;1045;1232;1234;1363;1545;1719;1873;1937;1940;2131;2179;2200;2306;3480;3609;3789;4024;4025;4634;4786;4928;5318;5382;6857;7024;7199;7527;7989;8052;8538;8625;8628;8842;9049;9091;9828;10032;11074;11116;11117	109;110	178;496
SPAC926.09c|fas1|I|fatty	SPAC926.09c|fas1|I|fatty	34	34	34	>SPAC926.09c|fas1|I|fatty acid synthase beta subunit Fas1	1	34	34	34	31	32	31	32	31	32	21.3	21.3	21.3	230.56	2073	2073	0	109.6	By MS/MS	By MS/MS	20	19.6	701440000	346570000	354870000	341680000	341910000	29	32	61				424	144;183;184;701;703;724;955;1100;1125;1191;1239;1298;1604;1863;2001;2118;2423;2490;2961;2982;4016;4129;4306;4401;4598;4633;4635;4979;5009;5097;5112;5146;5239;5304	True;True;True;True;True;True;True;True;True;True;True;True;True;True;True;True;True;True;True;True;True;True;True;True;True;True;True;True;True;True;True;True;True;True	152;191;192;723;725;748;984;1132;1157;1223;1274;1333;1642;1906;2046;2165;2481;2555;3040;3061;4149;4262;4443;4540;4749;4784;4786;5142;5172;5263;5278;5313;5408;5474	411;412;481;482;483;484;1491;1492;1494;1495;1542;2006;2289;2290;2291;2292;2337;2338;2339;2469;2470;2593;2594;2704;2705;3430;3431;3960;3961;3962;3963;4223;4224;4449;4450;5068;5069;5227;6168;6205;6206;8779;8780;9006;9007;9342;9343;9344;9345;9531;9532;9995;9996;10068;10069;10072;10776;10777;10836;10837;11006;11007;11035;11036;11105;11106;11386;11387;11515;11516	380;381;446;447;448;1410;1411;1413;1414;1456;1892;2158;2159;2160;2203;2204;2205;2206;2333;2334;2454;2455;2555;2556;3231;3232;3753;3754;3755;4005;4006;4223;4224;4812;4959;5866;5901;5902;8345;8346;8562;8563;8874;8875;8876;9056;9484;9485;9553;9555;10237;10238;10239;10293;10454;10455;10482;10483;10555;10556;10843;10844;10969;10970	380;446;448;1410;1414;1456;1892;2158;2203;2334;2455;2555;3231;3755;4006;4224;4812;4959;5866;5902;8346;8563;8875;9056;9485;9553;9555;10237;10293;10455;10482;10555;10843;10969
SPAC959.03c|utp7|I|U3	SPAC959.03c|utp7|I|U3	2	2	2	>SPAC959.03c|utp7|I|U3 snoRNP-associated protein Utp7 (predicted)	1	2	2	2	2	0	2	0	2	0	5.2	5.2	5.2	59.757	520	520	0	2.5586	By MS/MS	By matching	5.2	0	4416100	4416100	0	4416100	0	2	0	2				425	1345;2410	True;True	1381;2468	2795;5048	2638;4792	2638;4792
SPBC19F8.08|rps401|II|40S;SPAC959.07|rps403|I|40S	SPBC19F8.08|rps401|II|40S;SPAC959.07|rps403|I|40S	9;9	9;9	1;1	>SPBC19F8.08|rps401|II|40S ribosomal protein S4 (predicted);>SPAC959.07|rps403|I|40S ribosomal protein S4 (predicted)	2	9	9	1	9	9	9	9	1	1	28.6	28.6	4.6	29.688	262	262;262	0	28.875	By MS/MS	By MS/MS	28.6	28.6	242420000	114860000	127560000	118320000	117690000	10	8	18				426	391;551;852;1177;1719;3068;4307;4455;5362	True;True;True;True;True;True;True;True;True	403;567;881;1209;1761;3148;4444;4598;5534	853;854;1188;1189;1791;1792;2437;2438;3657;3658;6374;6375;9346;9347;9348;9349;9681;9682;11637;11638	804;805;1117;1118;1695;1696;2301;3456;3457;6062;6063;8877;8878;8879;9188;9189;11086;11087	804;1118;1695;2301;3456;6063;8879;9189;11087
SPAC9E9.03|leu2|I|3-isopropylmalate	SPAC9E9.03|leu2|I|3-isopropylmalate	9	9	9	>SPAC9E9.03|leu2|I|3-isopropylmalate dehydratase Leu2 (predicted)	1	9	9	9	7	9	7	9	7	9	16	16	16	82.782	758	758	0	29.011	By MS/MS	By MS/MS	12	16	111820000	46449000	65372000	48696000	59836000	6	9	15				427	630;879;911;1179;1377;1763;1842;4569;4829	True;True;True;True;True;True;True;True;True	650;908;940;1211;1413;1806;1885;4717;4988	1357;1358;1847;1911;1912;2440;2441;2855;2856;3757;3914;3915;9936;9937;10499;10500	1278;1751;1811;1812;2303;2304;2697;2698;3556;3711;3712;3713;9428;9429;9960	1278;1751;1811;2304;2698;3556;3712;9428;9960
SPAC9E9.09c|atd1|I|aldehyde	SPAC9E9.09c|atd1|I|aldehyde	20	20	20	>SPAC9E9.09c|atd1|I|aldehyde dehydrogenase (predicted)	1	20	20	20	19	18	19	18	19	18	53.7	53.7	53.7	54.768	503	503	0	95.067	By MS/MS	By MS/MS	51.5	49.7	1160700000	605000000	555720000	581640000	551110000	20	25	45				428	10;463;512;869;968;1467;1625;1948;2355;2511;3128;4335;4443;4637;4663;4782;5046;5121;5122;5432	True;True;True;True;True;True;True;True;True;True;True;True;True;True;True;True;True;True;True;True	10;477;527;898;998;1503;1664;1992;2411;2577;3208;4472;4585;4788;4815;4939;5211;5288;5289;5605	18;19;1003;1004;1100;1101;1102;1821;2031;2032;3103;3104;3469;3470;3471;3472;4119;4120;4937;4938;4939;4940;5268;5269;6491;6492;6493;6494;9402;9403;9644;9645;10074;10075;10076;10077;10130;10402;10403;10906;11054;11055;11056;11057;11058;11785;11786;11787;11788	18;19;938;939;940;1028;1029;1030;1723;1916;1917;2923;2924;3270;3271;3272;3906;4684;4685;4686;4999;5000;6172;6173;6174;6175;8933;9153;9557;9558;9559;9560;9561;9562;9610;9863;9864;10358;10503;10504;10505;10506;10507;11217;11218;11219	18;938;1028;1723;1917;2924;3270;3906;4684;5000;6173;8933;9153;9560;9610;9863;10358;10503;10506;11217
SPAC9E9.11|plr1|I|pyridoxal	SPAC9E9.11|plr1|I|pyridoxal	4	4	4	>SPAC9E9.11|plr1|I|pyridoxal reductase Plr1	1	4	4	4	1	4	1	4	1	4	11.4	11.4	11.4	36.814	333	333	0	7.2818	By MS/MS	By MS/MS	3.9	11.4	15289000	2951300	12337000	0	11717000	1	4	5				429	1361;3443;4278;5369	True;True;True;True	1397;3554;4415;5541	2823;7479;7480;9291;11648	2667;7114;7115;8824;11096	2667;7114;8824;11096
SPAC9G1.02|wis4|I|MAP	SPAC9G1.02|wis4|I|MAP	2	2	2	>SPAC9G1.02|wis4|I|MAP kinase kinase kinase Wis4	1	2	2	2	1	2	1	2	1	2	2	2	2	160.54	1401	1401	0	4.6688	By MS/MS	By MS/MS	0.9	2	15220000	7334600	7885600	0	7488800	1	2	3				430	643;1544	True;True	663;1581	1379;1380;3311	1300;1301;3114	1301;3114
SPAC9G1.05|aip1|I|actin	SPAC9G1.05|aip1|I|actin	1	1	1	>SPAC9G1.05|aip1|I|actin cortical patch component Aip1	1	1	1	1	0	1	0	1	0	1	3	3	3	65.266	595	595	0.003367	1.3664	By matching	By MS/MS	0	3	0	0	0	0	0	0	1	1				431	1364	TRUE	1400	2829	2674	2674
SPAC9G1.11c|spn4|I|mitotic	SPAC9G1.11c|spn4|I|mitotic	1	1	1	>SPAC9G1.11c|spn4|I|mitotic septin Spn4	1	1	1	1	1	0	1	0	1	0	2.4	2.4	2.4	44.773	380	380	0.0043908	1.189	By MS/MS	By matching	2.4	0	1512900	1512900	0	1512900	0	1	0	1				432	4944	TRUE	5107	10718	10179	10179
SPACUNK4.07c|cta4|I|P-type	SPACUNK4.07c|cta4|I|P-type	5	5	5	>SPACUNK4.07c|cta4|I|P-type ATPase, calcium transporting Cta4	1	5	5	5	5	3	5	3	5	3	6.9	6.9	6.9	136.26	1211	1211	0	9.7711	By MS/MS	By MS/MS	6.9	3.4	38483000	20342000	18141000	15002000	22568000	4	2	6				433	2686;3040;3240;3347;3586	True;True;True;True;True	2760;3119;3331;3458;3705	5618;5619;6316;6820;6821;7277;7796;7797	5342;5343;6009;6480;6921;7423	5343;6009;6480;6921;7423
SPACUNK4.10|SPACUNK4.10|I|glyoxylate	SPACUNK4.10|SPACUNK4.10|I|glyoxylate	3	3	3	>SPACUNK4.10|SPACUNK4.10|I|glyoxylate reductase (predicted)	1	3	3	3	1	3	1	3	1	3	10.5	10.5	10.5	36.701	334	334	0	7.5888	By MS/MS	By MS/MS	3	10.5	2874300	1172200	1702100	0	1616400	1	3	4				434	1820;2085;3922	True;True;True	1863;2131;4052	3871;3872;4377;8584	3670;3671;4153;8164	3671;4153;8164
SPACUNK4.16c|SPACUNK4.16c|I|alpha,alpha-trehalose-phosphate	SPACUNK4.16c|SPACUNK4.16c|I|alpha,alpha-trehalose-phosphate	13	13	13	>SPACUNK4.16c|SPACUNK4.16c|I|alpha,alpha-trehalose-phosphate synthase (predicted)	1	13	13	13	9	13	9	13	9	13	19.3	19.3	19.3	106.82	944	944	0	49.938	By MS/MS	By MS/MS	12.9	19.3	218280000	71058000	147220000	94830000	116040000	8	14	22				435	519;1031;1765;1903;2128;2208;3288;3386;3684;3832;4449;4624;4885	True;True;True;True;True;True;True;True;True;True;True;True;True	534;1062;1808;1946;2176;2260;3393;3497;3805;3960;4591;4775;5047	1112;1113;2160;3759;3760;4034;4035;4479;4480;4639;4640;6954;7362;7363;8006;8007;8008;8009;8419;8420;9668;10049;10050;10611	1040;1041;2041;3558;3559;3828;3829;4250;4400;4401;6615;7001;7002;7003;7621;7622;7623;7624;8010;9175;9537;9538;10070	1041;2041;3559;3828;4250;4400;6615;7002;7623;8010;9175;9538;10070
SPAP7G5.02c|gua2|I|GMP	SPAP7G5.02c|gua2|I|GMP	3	3	3	>SPAP7G5.02c|gua2|I|GMP synthase [glutamine-hydrolyzing] Gua2 (predicted)	1	3	3	3	2	2	2	2	2	2	7.6	7.6	7.6	60.044	539	539	0	8.68	By MS/MS	By MS/MS	4.8	5.4	35520000	14415000	21105000	14415000	0	2	2	4				436	272;2107;2140	True;True;True	281;2154;2189	651;4421;4501;4502	612;4197;4269;4270	612;4197;4269
SPAP7G5.04c|lys1|I|aminoadipate-semialdehyde	SPAP7G5.04c|lys1|I|aminoadipate-semialdehyde	14	14	14	>SPAP7G5.04c|lys1|I|aminoadipate-semialdehyde dehydrogenase	1	14	14	14	12	11	12	11	12	11	13.5	13.5	13.5	156.89	1419	1419	0	31.774	By MS/MS	By MS/MS	11.6	10.3	168600000	70041000	98556000	78775000	84863000	11	11	22				437	145;333;550;1162;1436;1990;2021;2291;2986;3574;4297;4305;4940;5182	True;True;True;True;True;True;True;True;True;True;True;True;True;True	153;344;566;1194;1472;2035;2066;2346;3065;3691;4434;4442;5103;5350	413;754;755;1187;2407;2408;2409;2410;3040;4204;4205;4260;4261;4816;6211;7769;7770;9322;9323;9340;9341;10712;10713;11165;11166	382;714;1116;2275;2276;2864;3989;3990;4039;4040;4569;5907;7396;7397;8854;8855;8872;8873;10173;10174;10613;10614	382;714;1116;2276;2864;3990;4039;4569;5907;7397;8854;8872;10173;10613
SPAP7G5.05|rpl1002|I|60S;SPBC18E5.04|rpl1001|II|60S	SPAP7G5.05|rpl1002|I|60S;SPBC18E5.04|rpl1001|II|60S	2;1	2;1	2;1	>SPAP7G5.05|rpl1002|I|60S ribosomal protein L10;>SPBC18E5.04|rpl1001|II|60S ribosomal protein L10	2	2	2	2	2	1	2	1	2	1	10.4	10.4	10.4	25.359	221	221;221	0	8.5254	By MS/MS	By MS/MS	10.4	5	33853000	29271000	4581900	29271000	0	2	1	3				438	2602;4935	True;True	2672;5098	5453;10706;10707	5183;10167;10168	5183;10168
SPAP8A3.07c|SPAP8A3.07c|I|phospho-2-dehydro-3-deoxyheptonate	SPAP8A3.07c|SPAP8A3.07c|I|phospho-2-dehydro-3-deoxyheptonate	2	2	2	>SPAP8A3.07c|SPAP8A3.07c|I|phospho-2-dehydro-3-deoxyheptonate aldolase (predicted)	1	2	2	2	2	2	2	2	2	2	7.3	7.3	7.3	40.638	372	372	0	6.1132	By MS/MS	By MS/MS	7.3	7.3	25248000	11852000	13397000	11526000	13048000	2	3	5				439	952;2413	True;True	981;2471	1997;1998;5053;5054	1884;1885;4797;4798;4799	1884;4799
SPAP8A3.08|cdc4|I|myosin	SPAP8A3.08|cdc4|I|myosin	1	1	1	>SPAP8A3.08|cdc4|I|myosin II light chain	1	1	1	1	0	1	0	1	0	1	5.7	5.7	5.7	15.661	141	141	0	1.6428	By matching	By MS/MS	0	5.7	0	0	0	0	0	0	1	1				440	4578	TRUE	4726	9951	9442	9442
SPAP8A3.09c|paa1|I|protein	SPAP8A3.09c|paa1|I|protein	2	2	2	>SPAP8A3.09c|paa1|I|protein phosphatase regulatory subunit Paa1	1	2	2	2	2	0	2	0	2	0	5.8	5.8	5.8	66.616	590	590	0	3.0777	By MS/MS	By matching	5.8	0	4523300	4523300	0	4523300	0	2	0	2				441	3078;5082	True;True	3158;5248	6391;10976	6078;10427	6078;10427
SPAP8A3.12c|tpp2|I|tripeptidyl-peptidase	SPAP8A3.12c|tpp2|I|tripeptidyl-peptidase	1	1	1	>SPAP8A3.12c|tpp2|I|tripeptidyl-peptidase II Tpp2	1	1	1	1	1	0	1	0	1	0	1.4	1.4	1.4	142.92	1274	1274	0.0011416	1.4654	By MS/MS	By matching	1.4	0	0	0	0	0	0	1	0	1				442	3075	TRUE	3155	6387	6074	6074
SPAPB17E12.11|ost3|I|oligosaccharyltransferase	SPAPB17E12.11|ost3|I|oligosaccharyltransferase	2	2	2	>SPAPB17E12.11|ost3|I|oligosaccharyltransferase gamma subunit Ost3 (predicted)	1	2	2	2	1	2	1	2	1	2	11.7	11.7	11.7	34.983	309	309	0	4.1414	By MS/MS	By MS/MS	7.8	11.7	42112000	17599000	24512000	0	23279000	1	1	2				443	4041;4365	True;True	4174;4503	8830;8831;9464	8396;8994	8396;8994
SPBC11C11.07|rpl1801|II|60S;SPAPB17E12.13|rpl1802|I|60S	SPBC11C11.07|rpl1801|II|60S;SPAPB17E12.13|rpl1802|I|60S	3;3	3;3	3;3	>SPBC11C11.07|rpl1801|II|60S ribosomal protein L18;>SPAPB17E12.13|rpl1802|I|60S ribosomal protein L18 (predicted)	2	3	3	3	2	2	2	2	2	2	15.5	15.5	15.5	21.19	187	187;187	0	5.557	By MS/MS	By MS/MS	11.2	11.8	36638000	18457000	18181000	0	17266000	2	2	4				444	143;1786;1923	True;True;True	151;1829;1967	409;410;3802;4075	378;379;3602;3865	378;3602;3865
SPAPB17E12.14c|SPAPB17E12.14c|I|6-phosphofructo-2-kinase/fructose-2,6-bisphosphate	SPAPB17E12.14c|SPAPB17E12.14c|I|6-phosphofructo-2-kinase/fructose-2,6-bisphosphate	5	5	5	>SPAPB17E12.14c|SPAPB17E12.14c|I|6-phosphofructo-2-kinase/fructose-2,6-bisphosphate 2-phosphatase (predicted)	1	5	5	5	4	3	4	3	4	3	8.4	8.4	8.4	76.392	668	668	0	6.2625	By MS/MS	By MS/MS	6	5.8	10108000	9513800	594090	9513800	0	3	3	6				445	123;1060;3148;5059;5437	True;True;True;True;True	131;1091;3228;5224;5610	377;378;2215;2216;6531;10926;11796	349;350;2090;6209;10377;11227	349;2090;6209;10377;11227
SPAPB1A10.16|SPAPB1A10.16|I|conserved	SPAPB1A10.16|SPAPB1A10.16|I|conserved	2	2	2	>SPAPB1A10.16|SPAPB1A10.16|I|conserved fungal protein	1	2	2	2	2	1	2	1	2	1	18.2	18.2	18.2	16.838	143	143	0	6.0001	By MS/MS	By MS/MS	18.2	9.8	19937000	10101000	9836500	10101000	0	2	1	3				446	3703;3981	True;True	3825;4114	8055;8702;8703	7668;8273;8274	7668;8273
SPAPB1E7.05|gde1|I|glycerophosphoryl	SPAPB1E7.05|gde1|I|glycerophosphoryl	2	2	2	>SPAPB1E7.05|gde1|I|glycerophosphoryl diester phosphodiesterase Gde1 (predicted)	1	2	2	2	2	0	2	0	2	0	2.5	2.5	2.5	118.13	1076	1076	0	1.9619	By MS/MS	By matching	2.5	0	4398600	4398600	0	4398600	0	2	0	2				447	2350;3016	True;True	2406;3095	4928;6270	4677;5961	4677;5961
SPAPB1E7.07|glt1|I|glutamate	SPAPB1E7.07|glt1|I|glutamate	29	29	29	>SPAPB1E7.07|glt1|I|glutamate synthase Glt1 (predicted)	1	29	29	29	24	26	24	26	24	26	18	18	18	232.85	2111	2111	0	85.012	By MS/MS	By MS/MS	15.1	16.4	435470000	196140000	239330000	207700000	205760000	25	31	56				448	62;105;147;182;491;835;838;1218;1375;1620;1724;2504;2711;2767;2847;2906;3245;3422;3708;3973;4087;4102;4315;4402;4672;4685;5085;5106;5260	True;True;True;True;True;True;True;True;True;True;True;True;True;True;True;True;True;True;True;True;True;True;True;True;True;True;True;True;True	67;112;155;190;506;864;867;1251;1411;1658;1766;2570;2785;2841;2922;2982;3338;3533;3830;4105;4220;4235;4452;4541;4824;4838;5251;5272;5429	137;138;345;346;416;417;418;480;1060;1061;1763;1764;1769;2518;2519;2520;2851;2852;3457;3458;3666;3667;3668;3669;3670;5254;5255;5676;5677;5783;5941;6053;6054;6834;6835;7437;7438;8063;8064;8687;8927;8956;8957;9365;9366;9533;10145;10146;10147;10148;10176;10177;10981;11024;11025;11026;11423;11424	134;320;321;385;386;387;445;991;992;1669;1673;2383;2384;2385;2694;2695;3259;3466;3467;3468;3469;3470;3471;4987;4988;5395;5396;5496;5649;5756;5757;6491;6492;7070;7071;7072;7676;7677;8259;8491;8520;8521;8895;9057;9624;9625;9626;9627;9655;9656;10432;10472;10473;10474;10880;10881	134;320;385;445;992;1669;1673;2383;2694;3259;3469;4988;5395;5496;5649;5757;6491;7071;7677;8259;8491;8521;8895;9057;9626;9656;10432;10473;10881
SPAPB1E7.09|ogm2|I|protein	SPAPB1E7.09|ogm2|I|protein	8	8	8	>SPAPB1E7.09|ogm2|I|protein O-mannosyltransferase Ogm2	1	8	8	8	8	8	8	8	8	8	12.7	12.7	12.7	85.036	739	739	0	21.687	By MS/MS	By MS/MS	12.7	12.7	1000400000	456240000	544140000	492870000	480140000	6	6	12				449	345;1927;2760;3485;3883;3989;4314;5157	True;True;True;True;True;True;True;True	356;1971;2834;3598;4011;4122;4451;5324	775;776;4081;4082;5771;5772;7557;7558;8504;8505;8719;8720;9363;9364;11123;11124	732;3870;3871;5483;5484;7192;7193;8092;8289;8290;8894;10574;10575	732;3870;5484;7193;8092;8289;8894;10575
SPAPB21F2.02|dop1|I|Dopey	SPAPB21F2.02|dop1|I|Dopey	2	2	2	>SPAPB21F2.02|dop1|I|Dopey family protein Dop1	1	2	2	2	1	2	1	2	1	2	1.7	1.7	1.7	192.65	1687	1687	0	3.3955	By MS/MS	By MS/MS	0.9	1.7	5092800	2233000	2859800	0	2715900	1	2	3				450	585;1358	True;True	604;1394	1264;1265;2818	1191;1192;2663	1191;2663
SPAPB8E5.03|mae1|I|malic	SPAPB8E5.03|mae1|I|malic	3	3	3	>SPAPB8E5.03|mae1|I|malic acid transport protein Mae1	1	3	3	3	3	2	3	2	3	2	5.9	5.9	5.9	49.304	438	438	0	6.007	By MS/MS	By MS/MS	5.9	4.1	29196000	19671000	9524200	18342000	10374000	3	2	5				451	1209;1472;5279	True;True;True	1242;1508;5449	2500;2501;3121;11464;11465	2366;2367;2939;10920;10921	2367;2939;10920
SPAPB8E5.09|rvb1|I|AAA	SPAPB8E5.09|rvb1|I|AAA	4	4	4	>SPAPB8E5.09|rvb1|I|AAA family ATPase Rvb1	1	4	4	4	2	4	2	4	2	4	13.4	13.4	13.4	50.052	456	456	0	43.23	By MS/MS	By MS/MS	7	13.4	30542000	10510000	20032000	0	19024000	2	4	6				452	1681;4347;4457;5415	True;True;True;True	1723;4485;4600;5588	3589;3590;9422;9423;9685;11752	3387;3388;8952;8953;9193;11186	3388;8952;9193;11186
SPAPJ696.01c|vps17|I|retromer	SPAPJ696.01c|vps17|I|retromer	5	5	5	>SPAPJ696.01c|vps17|I|retromer complex subunit Vps17	1	5	5	5	4	4	4	4	4	4	12.2	12.2	12.2	60.92	549	549	0	11.296	By MS/MS	By MS/MS	9.5	10	53529000	27841000	25688000	27303000	24934000	4	4	8				453	2318;2884;3377;4366;4587	True;True;True;True;True	2373;2960;3488;4504;4736	4863;4864;6016;6017;7345;7346;9465;9969	4613;4614;5721;5722;6983;6984;8995;9461	4613;5721;6983;8995;9461
SPAPJ696.02|lsb4|I|actin	SPAPJ696.02|lsb4|I|actin	3	3	3	>SPAPJ696.02|lsb4|I|actin cortical patch component Lsb4 (predicted)	1	3	3	3	2	3	2	3	2	3	8.1	8.1	8.1	46.373	430	430	0	4.4083	By MS/MS	By MS/MS	6	8.1	15847000	8161200	7685500	8477400	6982600	1	2	3				454	1461;2172;2887	True;True;True	1497;2221;2963	3091;3092;4560;6021;6022	2912;4323;5726	2912;4323;5726
SPAPJ698.02c|rps002|I|40S	SPAPJ698.02c|rps002|I|40S	6	6	4	>SPAPJ698.02c|rps002|I|40S ribosomal protein S0B	1	6	6	4	6	5	6	5	4	3	27.5	27.5	18.8	31.42	287	287	0	22.355	By MS/MS	By MS/MS	27.5	23.7	147570000	69598000	77973000	60859000	82789000	4	5	9				455	1142;1388;2766;3611;3910;4022	True;True;True;True;True;True	1174;1424;2840;3730;4038;4155	2367;2368;2957;2958;5781;5782;7861;7862;8561;8562;8792	2234;2784;2785;5494;5495;7487;8141;8142;8356	2234;2784;5494;7487;8141;8356
SPAPYUG7.05|SPAPYUG7.05|I|delta-1-pyrroline-5-carboxylate	SPAPYUG7.05|SPAPYUG7.05|I|delta-1-pyrroline-5-carboxylate	1	1	1	>SPAPYUG7.05|SPAPYUG7.05|I|delta-1-pyrroline-5-carboxylate reductase (predicted)	1	1	1	1	1	1	1	1	1	1	3.2	3.2	3.2	29.875	282	282	0	2.7641	By MS/MS	By MS/MS	3.2	3.2	5370100	3221500	2148600	0	2040500	1	1	2				456	2773	TRUE	2847	5796;5797	5509;5510	5509
SPAPYUK71.03c|syn1|I|synaptotagmin	SPAPYUK71.03c|syn1|I|synaptotagmin	1	1	1	>SPAPYUK71.03c|syn1|I|synaptotagmin family C2 domain protein, Syn1	1	1	1	1	0	1	0	1	0	1	1.2	1.2	1.2	135.78	1225	1225	0.0044743	1.3305	By matching	By MS/MS	0	1.2	0	0	0	0	0	0	1	1				457	4426	TRUE	4567	9602	9117	9117
SPBC106.03|SPBC106.03|II|DUF1776	SPBC106.03|SPBC106.03|II|DUF1776	3	3	3	>SPBC106.03|SPBC106.03|II|DUF1776 family protein	1	3	3	3	3	1	3	1	3	1	9.2	9.2	9.2	40.006	357	357	0	3.6357	By MS/MS	By matching	9.2	3.1	31906000	16760000	15146000	16760000	0	3	0	3				458	1287;4152;5124	True;True;True	1322;4285;5291	2682;9046;9047;11061	2534;8598;10510	2534;8598;10510
SPBC106.04|ada1|II|adenosine	SPBC106.04|ada1|II|adenosine	20	20	20	>SPBC106.04|ada1|II|adenosine deaminase Ada1	1	20	20	20	20	19	20	19	20	19	28.9	28.9	28.9	95.886	831	831	0	68.071	By MS/MS	By MS/MS	28.9	25.2	792850000	449890000	342960000	431940000	343650000	25	20	45				459	322;1034;1096;1302;1605;1873;2741;3038;3059;3483;3553;3554;3983;4825;4963;5154;5156;5313;5378;5421	True;True;True;True;True;True;True;True;True;True;True;True;True;True;True;True;True;True;True;True	333;1065;1128;1337;1643;1916;2815;3117;3139;3596;3669;3670;4116;4984;5126;5321;5323;5483;5550;5594	734;735;2165;2166;2167;2168;2284;2285;2712;2713;3432;3433;3981;3982;3983;3984;5741;5742;6312;6313;6352;6353;6354;6355;7553;7554;7703;7704;7705;7706;7707;8706;8707;10492;10493;10749;10750;11118;11119;11121;11122;11536;11537;11664;11665;11763	694;695;2046;2047;2048;2049;2153;2154;2563;2564;3233;3234;3773;3774;5455;6005;6006;6042;6043;6044;6045;7189;7190;7331;7332;7333;7334;7335;8277;8278;9951;9952;9953;9954;10213;10568;10569;10571;10572;10573;10987;10988;11110;11111;11112;11195;11196	694;2048;2153;2564;3233;3773;5455;6005;6044;7190;7331;7334;8277;9953;10213;10569;10573;10987;11110;11195
SPBC106.06|cct4|II|chaperonin-containing	SPBC106.06|cct4|II|chaperonin-containing	13	13	13	>SPBC106.06|cct4|II|chaperonin-containing T-complex delta subunit Cct4	1	13	13	13	10	12	10	12	10	12	33.8	33.8	33.8	56.968	527	527	0	42.67	By MS/MS	By MS/MS	26.8	29.6	1181900000	161130000	1020800000	561340000	569230000	11	14	25				460	279;565;1449;1479;1554;1976;2352;2702;2704;4079;4242;4267;4686	True;True;True;True;True;True;True;True;True;True;True;True;True	288;582;1485;1515;1591;2021;2408;2776;2778;4212;4377;4403;4839	662;663;1215;1216;1217;1218;3065;3066;3133;3134;3326;4178;4179;4931;4932;5653;5656;5657;5658;5659;8912;8913;9216;9270;10178;10179	621;622;1143;1144;1145;2889;2890;2949;2950;3126;3962;3963;4680;5372;5375;5376;5377;5378;8477;8478;8755;8803;9657;9658;9659	622;1143;2890;2949;3126;3963;4680;5372;5375;8478;8755;8803;9657
SPBC106.13|gid9|II|GID	SPBC106.13|gid9|II|GID	1	1	1	>SPBC106.13|gid9|II|GID complex subunit Gid9 (predicted)	1	1	1	1	1	1	1	1	1	1	3.2	3.2	3.2	45.857	404	404	0	3.6823	By MS/MS	By MS/MS	3.2	3.2	4818200	2024100	2794000	0	2653500	1	0	1				461	171	TRUE	179	459;460	423;424	423
SPBC106.16|pre6|II|20S	SPBC106.16|pre6|II|20S	1	1	1	>SPBC106.16|pre6|II|20S proteasome complex subunit alpha 4 Pre6	1	1	1	1	1	0	1	0	1	0	3.9	3.9	3.9	28.277	259	259	0	2.5701	By MS/MS	By matching	3.9	0	9248900	9248900	0	9248900	0	1	0	1				462	317	TRUE	328	726	686	686
SPBC106.17c|cys2|II|homoserine	SPBC106.17c|cys2|II|homoserine	2	2	2	>SPBC106.17c|cys2|II|homoserine O-acetyltransferase (predicted)	1	2	2	2	0	2	0	2	0	2	4.4	4.4	4.4	56.362	504	504	0	2.9059	By matching	By MS/MS	0	4.4	13420000	0	13420000	0	12745000	0	2	2				463	1319;3687	True;True	1354;3808	2743;8013	2590;7628	2590;7628
SPBC4F6.04|rpl2502|II|60S;SPBC106.18|rpl2501|II|60S	SPBC4F6.04|rpl2502|II|60S;SPBC106.18|rpl2501|II|60S	1;1	1;1	1;1	>SPBC4F6.04|rpl2502|II|60S ribosomal protein L25 (predicted);>SPBC106.18|rpl2501|II|60S ribosomal protein L25 (predicted)	2	1	1	1	1	1	1	1	1	1	9.2	9.2	9.2	15.767	141	141;141	0	1.5428	By matching	By MS/MS	9.2	9.2	23031000	5265900	17765000	0	16872000	0	1	1				464	3033	TRUE	3112	6300;6301	5992	5992
SPBC1105.02c|lys4|II|homocitrate	SPBC1105.02c|lys4|II|homocitrate	11	11	11	>SPBC1105.02c|lys4|II|homocitrate synthase	1	11	11	11	7	10	7	10	7	10	30.9	30.9	30.9	46.292	418	418	0	37.125	By MS/MS	By MS/MS	18.9	28	293560000	103590000	189970000	124850000	159160000	7	11	18				465	208;254;890;891;1370;3100;3355;3803;3919;4786;4945	True;True;True;True;True;True;True;True;True;True;True	216;263;919;920;1406;3180;3466;3929;4049;4944;5108	528;529;617;618;1863;1864;1865;1866;2842;6430;6431;7290;7291;8352;8578;8579;10411;10719	494;495;578;579;1767;1768;1769;1770;2686;6112;6113;6933;6934;7956;8158;8159;9870;10180	495;578;1768;1770;2686;6113;6934;7956;8159;9870;10180
SPBC1105.06|pmc4|II|mediator	SPBC1105.06|pmc4|II|mediator	1	1	1	>SPBC1105.06|pmc4|II|mediator complex subunit Med4	1	1	1	1	0	1	0	1	0	1	4.6	4.6	4.6	27.34	239	239	0	2.0647	By matching	By MS/MS	0	4.6	2871500	0	2871500	0	2727000	0	1	1				466	991	TRUE	1022	2073	1957	1957
SPBC115.03|SPBC115.03|II|gfo/idh/mocA	SPBC115.03|SPBC115.03|II|gfo/idh/mocA	2	2	2	>SPBC115.03|SPBC115.03|II|gfo/idh/mocA family oxidoreductase (predicted)	1	2	2	2	1	2	1	2	1	2	6	6	6	41.271	368	368	0	6.7946	By matching	By MS/MS	2.7	6	4000400	1347100	2653300	0	2519800	0	2	2				467	593;4090	True;True	612;4223	1278;8931;8932	1203;8495	1203;8495
SPBC119.01|rpn3|II|19S	SPBC119.01|rpn3|II|19S	1	1	1	>SPBC119.01|rpn3|II|19S proteasome regulatory subunit Rpn3	1	1	1	1	1	1	1	1	1	1	2.8	2.8	2.8	57.346	497	497	0.0086486	1.1073	By matching	By MS/MS	2.8	2.8	8433300	4777800	3655400	0	3471500	0	1	1				468	4577	TRUE	4725	9949;9950	9441	9441
SPBC119.02|ubc4|II|ubiquitin	SPBC119.02|ubc4|II|ubiquitin	1	1	1	>SPBC119.02|ubc4|II|ubiquitin conjugating enzyme E2 Ubc4/UbcP1	1	1	1	1	1	1	1	1	1	1	7.5	7.5	7.5	16.476	147	147	0	4.8273	By MS/MS	By MS/MS	7.5	7.5	26865000	12815000	14050000	0	13343000	1	1	2				469	744	TRUE	768	1588;1589	1500;1501	1501
SPBC119.08|pmk1|II|MAP	SPBC119.08|pmk1|II|MAP	5	5	4	>SPBC119.08|pmk1|II|MAP kinase Pmk1	1	5	5	4	4	4	4	4	3	3	11.4	11.4	9.5	48.261	422	422	0	16.01	By MS/MS	By MS/MS	9.2	9	28326000	23307000	5019400	13361000	14713000	4	4	8				470	348;1967;2802;4833;5299	True;True;True;True;True	359;2012;2876;4992;5469	782;783;4160;4161;5853;10507;11503;11504	738;739;3945;3946;5566;9967;10959;10960	738;3946;5566;9967;10959
SPBC119.10|asn1|II|asparagine	SPBC119.10|asn1|II|asparagine	25	25	25	>SPBC119.10|asn1|II|asparagine synthetase	1	25	25	25	21	24	21	24	21	24	53.3	53.3	53.3	63.24	557	557	0	254	By MS/MS	By MS/MS	47.8	51.9	1925900000	883950000	1042000000	871650000	948210000	25	30	55				471	106;277;416;735;761;781;819;1081;2092;2215;2383;2435;2530;2542;2739;3428;3501;3824;4254;4458;4642;4958;5247;5248;5373	True;True;True;True;True;True;True;True;True;True;True;True;True;True;True;True;True;True;True;True;True;True;True;True;True	113;286;429;759;786;808;848;1113;2138;2267;2439;2495;2598;2610;2813;3539;3615;3951;4389;4390;4601;4793;5121;5416;5417;5545	347;348;659;660;906;907;1566;1567;1568;1569;1619;1662;1731;1732;2255;4391;4392;4393;4655;4993;4994;5101;5102;5103;5104;5316;5317;5318;5319;5346;5347;5735;5736;5737;5738;7446;7447;7448;7449;7591;7592;8402;8403;9243;9244;9245;9246;9686;9687;10084;10085;10742;10743;11399;11400;11401;11655;11656	322;619;849;1479;1480;1481;1482;1533;1570;1640;1641;2126;4167;4168;4169;4412;4741;4742;4743;4840;4841;4842;5049;5050;5051;5052;5079;5080;5449;5450;5451;5452;7081;7082;7083;7084;7085;7226;7227;7994;7995;8779;8780;8781;8782;9194;9195;9569;9570;10206;10207;10859;10860;10861;11104	322;619;849;1481;1533;1570;1641;2126;4167;4412;4741;4841;5049;5079;5449;7083;7226;7995;8779;9194;9570;10207;10859;10861;11104	111	401
SPBC1198.02|dea2|II|adenine	SPBC1198.02|dea2|II|adenine	2	2	2	>SPBC1198.02|dea2|II|adenine deaminase Dea2	1	2	2	2	2	2	2	2	2	2	6.5	6.5	6.5	41.198	367	367	0	4.3955	By MS/MS	By MS/MS	6.5	6.5	32299000	14324000	17975000	13257000	11608000	2	2	4				472	3984;4419	True;True	4117;4560	8708;8709;8710;8711;9588;9589	8279;8280;8281;9106	8279;9106
SPBC1198.08|dug1|II|dipeptidase	SPBC1198.08|dug1|II|dipeptidase	2	2	2	>SPBC1198.08|dug1|II|dipeptidase Dug1 (predicted)	1	2	2	2	2	1	2	1	2	1	5.3	5.3	5.3	52.84	476	476	0	1.5468	By MS/MS	By MS/MS	5.3	1.7	6150600	4346300	1804300	4346300	0	2	1	3				473	893;2599	True;True	922;2669	1868;5448;5449	1772;5177;5178	1772;5178
SPBC11B10.02c|his3|II|histidinol-phosphate	SPBC11B10.02c|his3|II|histidinol-phosphate	2	2	2	>SPBC11B10.02c|his3|II|histidinol-phosphate aminotransferase imidazole acetol phosphate transaminase His3	1	2	2	2	2	2	2	2	2	2	5.5	5.5	5.5	42.733	384	384	0	2.4619	By MS/MS	By MS/MS	5.5	5.5	7103500	3450000	3653500	0	3469700	1	2	3				474	2532;3952	True;True	2600;4084	5324;5325;8647;8648	5057;8220;8221	5057;8220
SPBC11B10.03|cog8|II|Golgi	SPBC11B10.03|cog8|II|Golgi	3	3	3	>SPBC11B10.03|cog8|II|Golgi transport complex subunit Cog8 (predicted)	1	3	3	3	2	3	2	3	2	3	10.6	10.6	10.6	44.08	378	378	0	7.3334	By MS/MS	By MS/MS	7.7	10.6	29490000	13117000	16374000	13402000	15264000	2	3	5				475	734;3455;4185	True;True;True	758;3566;4320	1565;7499;7500;9115;9116	1478;7132;7133;8665;8666	1478;7132;8665
SPBC11B10.05c|rsp1|II|random	SPBC11B10.05c|rsp1|II|random	4	4	4	>SPBC11B10.05c|rsp1|II|random septum position protein Rsp1	1	4	4	4	4	4	4	4	4	4	14.4	14.4	14.4	56.288	494	494	0	17.714	By MS/MS	By MS/MS	14.4	14.4	96389000	55203000	41185000	56325000	37991000	3	5	8				476	817;902;2820;4184	True;True;True;True	846;931;2894;4319	1728;1729;1893;1894;5886;5887;9113;9114	1637;1638;1794;1795;5600;5601;5602;8664	1637;1795;5602;8664
SPBC11B10.09|cdc2|II|cyclin-dependent;SPBC18H10.15|cdk11|II|serine/threonine	SPBC11B10.09|cdc2|II|cyclin-dependent	5;1	5;1	4;0	>SPBC11B10.09|cdc2|II|cyclin-dependent protein kinase Cdk1/Cdc2	2	5	5	4	4	4	4	4	3	3	20.5	20.5	17.8	34.358	297	297;398	0	10.825	By MS/MS	By MS/MS	16.5	17.2	65939000	40339000	25599000	31621000	33030000	4	4	8				477	2262;2513;2813;3953;5095	True;True;True;True;True	2317;2579;2887;4085;5261	4765;5272;5273;5874;8649;8650;11002;11003	4521;5003;5004;5589;8222;8223;10451;10452	4521;5003;5589;8223;10451
SPBC11C11.06c|SPBC11C11.06c|II|Schizosaccharomyces	SPBC11C11.06c|SPBC11C11.06c|II|Schizosaccharomyces	1	1	1	>SPBC11C11.06c|SPBC11C11.06c|II|Schizosaccharomyces specific protein	1	1	1	1	1	1	1	1	1	1	7.3	7.3	7.3	19.126	178	178	0	1.7713	By MS/MS	By MS/MS	7.3	7.3	3325600	1757200	1568400	0	1489500	1	1	2				478	903	TRUE	932	1895;1896	1796;1797	1796
SPBC1215.02c|naa25|II|NatB	SPBC1215.02c|naa25|II|NatB	7	7	7	>SPBC1215.02c|naa25|II|NatB N-acetyltransferase complex regulatory subunit Naa25	1	7	7	7	7	6	7	6	7	6	9.5	9.5	9.5	92.456	811	811	0	22.027	By MS/MS	By MS/MS	9.5	8	37779000	21531000	16249000	15031000	21931000	8	6	14				479	1404;1569;1634;3195;3209;3427;3436	True;True;True;True;True;True;True	1440;1606;1673;3275;3289;3538;3547	2985;2986;3360;3361;3489;6637;6638;6664;6665;7444;7445;7466;7467	2813;2814;3161;3162;3163;3290;6311;6312;6335;6336;7079;7080;7102;7103	2813;3163;3290;6312;6335;7080;7102
SPBC1271.02|stt3|II|oligosaccharyltransferase	SPBC1271.02|stt3|II|oligosaccharyltransferase	4	4	4	>SPBC1271.02|stt3|II|oligosaccharyltransferase subunit Stt3	1	4	4	4	4	2	4	2	4	2	5.5	5.5	5.5	84.973	752	752	0	4.7575	By MS/MS	By MS/MS	5.5	2.7	10576000	4954700	5621200	4954700	0	4	1	5				480	847;1549;3380;3802	True;True;True;True	876;1586;3491;3928	1783;3319;7351;7352;8350;8351	1687;3121;6990;6991;6992;7955	1687;3121;6992;7955
SPBC1271.12|kes1|II|oxysterol	SPBC1271.12|kes1|II|oxysterol	3	3	3	>SPBC1271.12|kes1|II|oxysterol binding protein (predicted)	1	3	3	3	3	2	3	2	3	2	7.5	7.5	7.5	44.591	388	388	0	2.4734	By MS/MS	By MS/MS	7.5	5.4	13420000	10192000	3227900	10192000	0	3	1	4				481	892;2460;5134	True;True;True	921;2522;5301	1867;5160;5161;11081;11082	1771;4896;4897;10530	1771;4896;10530
SPBC1289.03c|spi1|II|Ran	SPBC1289.03c|spi1|II|Ran	4	4	4	>SPBC1289.03c|spi1|II|Ran GTPase Spi1	1	4	4	4	3	4	3	4	3	4	21.3	21.3	21.3	24.555	216	216	0	11.435	By MS/MS	By MS/MS	14.8	21.3	58345000	16422000	41923000	27351000	28885000	3	4	7				482	1851;3158;4151;4696	True;True;True;True	1894;3238;4284;4849	3932;3933;6553;6554;9045;10232;10233	3729;3730;6230;6231;8597;9707;9708	3729;6231;8597;9707
SPBC1289.06c|ppr8|II|mitochondrial	SPBC1289.06c|ppr8|II|mitochondrial	3	3	3	>SPBC1289.06c|ppr8|II|mitochondrial PPR repeat protein Ppr8	1	3	3	3	1	2	1	2	1	2	7.1	7.1	7.1	54.652	481	481	0	12.117	By MS/MS	By MS/MS	2.3	4.8	14080000	2440000	11640000	0	11055000	1	2	3				483	422;1615;5193	True;True;True	435;1653;5361	921;3449;11184	863;3251;10632	863;3251;10632
SPBC1289.09|tim21|II|TIM23	SPBC1289.09|tim21|II|TIM23	2	2	2	>SPBC1289.09|tim21|II|TIM23 translocase complex subunit Tim21 (predicted)	1	2	2	2	0	2	0	2	0	2	9.9	9.9	9.9	25.568	223	223	0	2.4128	By matching	By MS/MS	0	9.9	439550	0	439550	0	417430	0	2	2				484	271;2108	True;True	280;2155	650;4422	611;4198	611;4198
SPBC1289.10c|adn2|II|transcription	SPBC1289.10c|adn2|II|transcription	1	1	1	>SPBC1289.10c|adn2|II|transcription factor (predicted)	1	1	1	1	1	0	1	0	1	0	1.3	1.3	1.3	81.158	743	743	0	1.9039	By MS/MS	By matching	1.3	0	1275800	1275800	0	1275800	0	1	0	1				485	496	TRUE	511	1073	1001	1001
SPBC1289.16c|cao2|II|copper	SPBC1289.16c|cao2|II|copper	11	10	10	>SPBC1289.16c|cao2|II|copper amine oxidase-like protein Cao2	1	11	10	10	10	8	9	7	9	7	16.6	15.1	15.1	90.126	794	794	0	14.405	By MS/MS	By MS/MS	16.5	14.1	93128000	55256000	37873000	47095000	44128000	6	6	12				486	7;1764;2277;2309;2417;2736;3394;4040;4815;5300;5423	True;True;True;True;True;False;True;True;True;True;True	7;1807;2332;2364;2475;2810;3505;4173;4974;5470;5596	13;14;3758;4789;4848;4849;5060;5727;5728;7376;7377;8828;8829;10473;10474;11505;11506;11766	13;14;3557;4544;4597;4598;4804;5441;7014;8395;9932;9933;10961;11200	13;3557;4544;4598;4804;5441;7014;8395;9933;10961;11200
SPBC12C2.07c|srm1|II|spermidine	SPBC12C2.07c|srm1|II|spermidine	1	1	1	>SPBC12C2.07c|srm1|II|spermidine synthase Srm1 (predicted)	1	1	1	1	1	1	1	1	1	1	4.4	4.4	4.4	33.149	298	298	0	2.5537	By MS/MS	By MS/MS	4.4	4.4	10864000	5554700	5309300	0	5042100	1	1	2				487	4915	TRUE	5077	10669;10670	10128;10129	10129
SPBC12C2.11|SPBC12C2.11|II|glutamine-fructose-6-phosphate	SPBC12C2.11|SPBC12C2.11|II|glutamine-fructose-6-phosphate	5	5	5	>SPBC12C2.11|SPBC12C2.11|II|glutamine-fructose-6-phosphate transaminase (predicted)	1	5	5	5	5	2	5	2	5	2	8	8	8	77.321	696	696	0	9.7846	By MS/MS	By MS/MS	8	3.9	35482000	19932000	15550000	14787000	19913000	3	2	5				488	1256;1262;1742;3179;3180	True;True;True;True;True	1291;1297;1784;3259;3260	2624;2625;2636;2637;3712;6606;6607	2483;2494;3513;6282;6283	2483;2494;3513;6282;6283
SPBC12D12.03|cct1|II|chaperonin-containing	SPBC12D12.03|cct1|II|chaperonin-containing	8	8	8	>SPBC12D12.03|cct1|II|chaperonin-containing T-complex alpha subunit Cct1	1	8	8	8	7	7	7	7	7	7	20.3	20.3	20.3	60.046	556	556	0	21.568	By MS/MS	By MS/MS	18.5	18.5	1135800000	597430000	538370000	576370000	532340000	5	7	12				489	169;1042;1347;1638;1963;2087;3500;5093	True;True;True;True;True;True;True;True	177;1073;1383;1677;2007;2133;3614;5259	455;456;2180;2181;2182;2183;2800;3498;3499;4149;4380;4381;7589;7590;10996;10997;10998	420;2058;2059;2060;2644;3298;3299;3935;4155;7224;7225;10445;10446;10447	420;2060;2644;3299;3935;4155;7224;10446
SPBC12D12.04c|pck2|II|protein	SPBC12D12.04c|pck2|II|protein	6	6	6	>SPBC12D12.04c|pck2|II|protein kinase C (PKC)-like Pck2	1	6	6	6	5	6	5	6	5	6	7.2	7.2	7.2	116	1016	1016	0	20.23	By MS/MS	By MS/MS	6.4	7.2	37221000	21838000	15382000	20368000	16078000	5	7	12				490	756;2064;2264;2465;2855;5243	True;True;True;True;True;True	781;2109;2319;2528;2930;5412	1611;1612;4337;4338;4767;4768;5170;5171;5955;5956;11393	1525;1526;4117;4118;4523;4524;4907;4908;4909;5662;5663;10851	1525;4117;4524;4908;5662;10851
SPBC1306.02|rtt10|II|WD	SPBC1306.02|rtt10|II|WD	1	1	1	>SPBC1306.02|rtt10|II|WD repeat protein, human WDR6 family, involved in endocytic recycling	1	1	1	1	1	0	1	0	1	0	1	1	1	110.98	984	984	0.0044593	1.3164	By MS/MS	By matching	1	0	0	0	0	0	0	1	0	1				491	805	TRUE	832	1705	1615	1615
SPBC13A2.02|nup82|II|nucleoporin;REV__SPAC323.05c|mtq2|I|protein	SPBC13A2.02|nup82|II|nucleoporin	10;1	10;1	10;1	>SPBC13A2.02|nup82|II|nucleoporin Nup82	2	10	10	10	10	7	10	7	10	7	14.8	14.8	14.8	90.611	803	803;231	0	37.827	By MS/MS	By MS/MS	14.8	10.5	104270000	84254000	20016000	81280000	21983000	9	5	14				492	1265;2148;2331;2505;2603;2808;3581;4461;4549;5150	True;True;True;True;True;True;True;True;True;True	1300;2197;2387;2571;2673;2882;3700;4604;4695;5317	2641;4515;4516;4894;4895;5256;5454;5455;5863;5864;7788;9693;9694;9887;9888;11111;11112	2497;4285;4286;4639;4989;5184;5185;5578;5579;7415;9201;9386;9387;10561;10562	2497;4285;4639;4989;5185;5579;7415;9201;9386;10562
SPBC13E7.01|cwf22|II|splicing	SPBC13E7.01|cwf22|II|splicing	5	5	5	>SPBC13E7.01|cwf22|II|splicing factor Cwf22	1	5	5	5	5	5	5	5	5	5	7.7	7.7	7.7	102.7	886	886	0	58.317	By MS/MS	By MS/MS	7.7	7.7	48849000	28770000	20079000	25618000	22221000	5	5	10				493	310;1321;2181;2732;3592	True;True;True;True;True	321;1356;2231;2806;3711	715;716;2745;2746;4578;4579;5720;5721;7821;7822	675;676;677;2592;2593;4340;4341;5434;5435;7447	675;2592;4341;5434;7447
SPBC13G1.02|mpg2|II|mannose-1-phosphate	SPBC13G1.02|mpg2|II|mannose-1-phosphate	8	8	8	>SPBC13G1.02|mpg2|II|mannose-1-phosphate guanyltransferase (predicted)	1	8	8	8	6	7	6	7	6	7	30	30	30	46.096	414	414	0	22.462	By MS/MS	By MS/MS	24.4	27.1	156190000	79655000	76538000	82802000	69541000	6	8	14				494	236;330;494;855;1344;2068;4340;4738	True;True;True;True;True;True;True;True	245;341;509;884;1380;2113;4477;4895	581;750;1065;1066;1067;1068;1796;1797;2793;2794;4344;4345;9412;9413;10316;10317	542;710;996;997;998;1700;1701;2636;2637;4124;8942;8943;9784;9785	542;710;997;1701;2637;4124;8942;9785
SPBC146.01|med15|II|mediator	SPBC146.01|med15|II|mediator	14	14	14	>SPBC146.01|med15|II|mediator complex subunit Med15	1	14	14	14	13	9	13	9	13	9	19.8	19.8	19.8	118.45	1063	1063	0	47.053	By MS/MS	By MS/MS	16.7	14.1	270440000	192070000	78364000	150490000	111190000	15	7	22				495	157;349;1734;1849;2115;2197;2348;2525;2717;3548;3662;3739;3761;4924	True;True;True;True;True;True;True;True;True;True;True;True;True;True	165;360;1776;1892;2162;2248;2249;2404;2592;2791;3664;3781;3863;3885;5087	433;784;3692;3693;3928;3929;4443;4444;4612;4613;4614;4615;4925;4926;5303;5688;7693;7953;8140;8141;8185;8186;10686;10687	400;740;3493;3494;3726;4218;4374;4375;4376;4377;4378;4674;5036;5406;7322;7573;7574;7756;7803;7804;10147;10148	400;740;3494;3726;4218;4375;4674;5036;5406;7322;7574;7756;7804;10147	112	350
SPBC146.13c|myo1|II|myosin	SPBC146.13c|myo1|II|myosin	1	1	1	>SPBC146.13c|myo1|II|myosin type I	1	1	1	1	1	1	1	1	1	1	1.1	1.1	1.1	135.71	1217	1217	0	2.833	By MS/MS	By MS/MS	1.1	1.1	11380000	4680600	6699600	0	6362500	1	1	2				496	2927	TRUE	3005	6097;6098	5800;5801	5800
SPBC146.14c|sec26|II|coatomer	SPBC146.14c|sec26|II|coatomer	6	6	6	>SPBC146.14c|sec26|II|coatomer beta subunit (predicted)	1	6	6	6	4	5	4	5	4	5	8.6	8.6	8.6	104.7	940	940	0	11.014	By MS/MS	By MS/MS	5.2	7.3	48732000	29109000	19623000	30526000	17219000	5	5	10				497	226;2590;2794;3320;3550;4295	True;True;True;True;True;True	235;2660;2868;3429;3666;4432	559;5437;5836;5837;7208;7209;7696;9318;9319	521;5166;5549;5550;5551;6860;6861;7326;8849;8850	521;5166;5550;6861;7326;8850
SPBC14F5.02|trs65|II|TRAPP	SPBC14F5.02|trs65|II|TRAPP	1	1	1	>SPBC14F5.02|trs65|II|TRAPP complex subunit Trs65 (predicted)	1	1	1	1	1	0	1	0	1	0	4.1	4.1	4.1	57.939	515	515	0	38.937	By MS/MS	By matching	4.1	0	0	0	0	0	0	1	0	1				498	2014	TRUE	2059	4248	4028	4028
SPBC14F5.03c|kap123|II|karyopherin	SPBC14F5.03c|kap123|II|karyopherin	4	4	4	>SPBC14F5.03c|kap123|II|karyopherin Kap123	1	4	4	4	4	3	4	3	4	3	5.7	5.7	5.7	117.83	1067	1067	0	25.547	By MS/MS	By MS/MS	5.7	3.8	25052000	15778000	9274000	13842000	10743000	3	3	6				499	274;3013;3146;5054	True;True;True;True	283;3092;3226;5219	653;654;655;6265;6266;6527;6528;10918	614;615;5955;5956;6205;6206;10368	615;5956;6205;10368
SPBC14F5.04c|pgk1|II|phosphoglycerate	SPBC14F5.04c|pgk1|II|phosphoglycerate	37	37	37	>SPBC14F5.04c|pgk1|II|phosphoglycerate kinase Pgk1 (predicted)	1	37	37	37	37	34	37	34	37	34	83.1	83.1	83.1	43.963	414	414	0	180.86	By MS/MS	By MS/MS	83.1	81.4	3962500000	2192100000	1770400000	2013200000	1850500000	46	42	88				500	44;176;264;305;465;466;854;958;1240;1267;1507;2056;2237;2327;2448;2499;2528;2529;3473;3474;3475;3552;3597;4116;4135;4362;4463;4653;4654;4711;4712;4798;4859;5013;5196;5263;5392	True;True;True;True;True;True;True;True;True;True;True;True;True;True;True;True;True;True;True;True;True;True;True;True;True;True;True;True;True;True;True;True;True;True;True;True;True	45;184;273;316;479;480;883;987;1275;1302;1543;2101;2290;2383;2510;2564;2596;2597;3586;3587;3588;3668;3716;4249;4268;4500;4606;4804;4805;4866;4867;4956;5020;5176;5177;5364;5432;5565	86;87;88;89;469;470;638;639;706;707;1006;1007;1008;1009;1010;1794;1795;2009;2010;2595;2596;2597;2598;2644;2645;3185;3186;4323;4324;4699;4700;4879;4880;4881;4882;5134;5242;5243;5310;5311;5312;5313;5314;5315;7533;7534;7535;7536;7537;7538;7539;7701;7702;7831;7832;8980;8981;8982;9017;9018;9456;9457;9697;9698;9699;10107;10108;10109;10110;10265;10266;10267;10268;10269;10438;10439;10566;10567;10844;1084…	84;85;86;87;434;435;598;599;600;666;667;942;943;944;945;946;947;1698;1699;1895;1896;2456;2457;2458;2459;2500;2501;2998;2999;3000;4104;4105;4106;4454;4455;4626;4627;4628;4873;4974;4975;5044;5045;5046;5047;5048;7167;7168;7169;7170;7171;7172;7173;7174;7330;7455;7456;8540;8541;8542;8572;8573;8984;8985;9204;9205;9206;9590;9591;9737;9738;9739;9740;9741;9742;9899;9900;9901;10025;10026;10299;10300;10301;…	86;435;598;666;942;946;1698;1895;2457;2501;2998;4106;4455;4627;4873;4974;5044;5047;7167;7169;7172;7330;7455;8541;8573;8984;9204;9590;9591;9737;9742;9899;10026;10301;10641;10884;11140	113	187
SPBC14F5.05c|sam1|II|S-adenosylmethionine	SPBC14F5.05c|sam1|II|S-adenosylmethionine	17	17	17	>SPBC14F5.05c|sam1|II|S-adenosylmethionine synthetase	1	17	17	17	16	17	16	17	16	17	66.8	66.8	66.8	41.831	382	382	0	71.505	By MS/MS	By MS/MS	66.8	66.8	1349200000	626190000	722970000	593710000	719070000	19	22	41				501	259;385;614;1426;2109;2119;2917;2979;3020;3336;3821;3857;4025;4363;4570;4575;4626	True;True;True;True;True;True;True;True;True;True;True;True;True;True;True;True;True	268;396;397;633;1462;2156;2166;2995;3058;3099;3447;3948;3985;4158;4501;4718;4723;4777	627;628;842;843;844;845;1326;1327;3022;3023;4423;4424;4425;4426;4451;4452;6075;6076;6199;6275;6276;6277;6278;7250;7251;7252;7253;8397;8398;8457;8458;8459;8460;8797;8798;8799;8800;9458;9459;9938;9939;9945;9946;10053;10054;10055;10056	588;589;796;797;1250;1251;2847;2848;4199;4200;4201;4202;4203;4225;5779;5780;5894;5966;5967;5968;6898;6899;6900;6901;7991;8047;8048;8049;8050;8361;8362;8363;8364;8986;8987;9430;9431;9432;9438;9541;9542;9543	589;797;1251;2847;4202;4225;5780;5894;5966;6900;7991;8047;8361;8986;9432;9438;9542
SPBC14F5.06|rli1|II|iron-sulfur	SPBC14F5.06|rli1|II|iron-sulfur	7	7	7	>SPBC14F5.06|rli1|II|iron-sulfur ATPase involved in ribosome biogenesis and translation Rli1 (predicted)	1	7	7	7	6	6	6	6	6	6	15.5	15.5	15.5	66.589	593	593	0	19.86	By MS/MS	By MS/MS	13.8	13.8	74244000	39971000	34273000	42300000	30220000	5	5	10				502	286;897;1149;1660;2568;3598;4336	True;True;True;True;True;True;True	295;926;1181;1700;2638;3717;4473	675;676;1877;1878;2381;2382;3540;5398;7833;7834;9404;9405	637;1779;2247;2248;3339;5128;7457;7458;8934;8935	637;1779;2247;3339;5128;7457;8934
SPBC14F5.09c|ade8|II|adenylosuccinate	SPBC14F5.09c|ade8|II|adenylosuccinate	1	1	1	>SPBC14F5.09c|ade8|II|adenylosuccinate lyase Ade8	1	1	1	1	1	0	1	0	1	0	2.5	2.5	2.5	54.307	482	482	0	2.3529	By MS/MS	By matching	2.5	0	2222700	2222700	0	2222700	0	0	0	0				503	5202	TRUE	5370	11201	10648	10648
SPBC14F5.11c|mug186|II|sorting	SPBC14F5.11c|mug186|II|sorting	1	1	1	>SPBC14F5.11c|mug186|II|sorting nexin Snx41 (predicted)	1	1	1	1	1	0	1	0	1	0	1.2	1.2	1.2	67.001	586	586	0.0011287	1.4036	By MS/MS	By matching	1.2	0	0	0	0	0	0	1	0	1				504	2877	TRUE	2952	6000	5705	5705
SPBC1539.03c|arg41|II|argininosuccinate;SPBC1773.14|arg7|II|argininosuccinate	SPBC1539.03c|arg41|II|argininosuccinate	4;1	4;1	4;1	>SPBC1539.03c|arg41|II|argininosuccinate lyase (predicted)	2	4	4	4	2	3	2	3	2	3	14.3	14.3	14.3	51.571	460	460;461	0	17.256	By MS/MS	By MS/MS	9.3	10.4	35026000	16423000	18603000	24462000	9628100	3	3	6				505	702;2975;3480;4618	True;True;True;True	724;3054;3593;4769	1493;6192;7549;10037;10038;10039;10040	1412;5887;7184;9527;9528;9529	1412;5887;7184;9529
SPBC1539.05|cog3|II|Golgi	SPBC1539.05|cog3|II|Golgi	2	2	2	>SPBC1539.05|cog3|II|Golgi transport complex subunit Cog3 (predicted)	1	2	2	2	2	0	2	0	2	0	3.1	3.1	3.1	85.998	735	735	0	2.8953	By MS/MS	By matching	3.1	0	2654800	2654800	0	2654800	0	1	0	1				506	2633;4120	True;True	2703;4253	5504;8991	5232;8548	5232;8548
SPBC1539.06|acb1|II|fatty-acyl-CoA	SPBC1539.06|acb1|II|fatty-acyl-CoA	1	1	1	>SPBC1539.06|acb1|II|fatty-acyl-CoA binding binding protein Acb1 (predicted)	1	1	1	1	1	0	1	0	1	0	19.5	19.5	19.5	9.838	87	87	0	2.5385	By MS/MS	By matching	19.5	0	2450400	2450400	0	2450400	0	2	0	2				507	4056	TRUE	4189	8862	8425;8426	8426
SPBC1539.09c|trp1|II|anthranilate	SPBC1539.09c|trp1|II|anthranilate	2	2	2	>SPBC1539.09c|trp1|II|anthranilate synthase component II, multifunctional enzyme Trp1	1	2	2	2	2	2	2	2	2	2	1.8	1.8	1.8	83.039	759	759	0	1.583	By MS/MS	By MS/MS	1.8	1.8	6282900	2116700	4166200	2343100	3730100	2	1	3				508	455;2388	True;True	469;2444	986;987;5002;5003	922;923;4751	922;4751
SPBC1604.05|pgi1|II|glucose-6-phosphate	SPBC1604.05|pgi1|II|glucose-6-phosphate	15	15	15	>SPBC1604.05|pgi1|II|glucose-6-phosphate isomerase (predicted)	1	15	15	15	13	12	13	12	13	12	33.5	33.5	33.5	60.883	550	550	0	36.972	By MS/MS	By MS/MS	30.5	28.7	415370000	203220000	212150000	187660000	217040000	14	11	25				509	77;457;506;552;800;841;883;1351;1790;2177;2776;3434;3558;3880;4410	True;True;True;True;True;True;True;True;True;True;True;True;True;True;True	84;471;521;568;827;870;912;1387;1833;2226;2850;3545;3674;4008;4551	176;177;990;991;1089;1090;1190;1696;1697;1774;1852;2805;2806;3809;3810;4569;4570;5803;5804;7462;7463;7714;8500;9563;9564;9565;9566	171;926;1017;1018;1119;1605;1606;1607;1678;1757;2649;2650;2651;3611;3612;4332;5517;5518;7098;7099;7342;8088;9084;9085;9086	171;926;1018;1119;1605;1678;1757;2649;3612;4332;5518;7099;7342;8088;9085
SPBC1604.07|atp4|II|F0-ATPase	SPBC1604.07|atp4|II|F0-ATPase	1	1	1	>SPBC1604.07|atp4|II|F0-ATPase subunit (predicted)	1	1	1	1	0	1	0	1	0	1	3.3	3.3	3.3	26.7	244	244	0.009544	0.9518	By matching	By MS/MS	0	3.3	2897400	0	2897400	0	2751600	0	1	1				510	3137	TRUE	3217	6512	6191	6191
SPBC1604.14c|shk1|II|PAK-related	SPBC1604.14c|shk1|II|PAK-related	2	2	2	>SPBC1604.14c|shk1|II|PAK-related kinase Shk1	1	2	2	2	1	2	1	2	1	2	3.8	3.8	3.8	72.357	658	658	0	3.8039	By MS/MS	By MS/MS	2	3.8	8818700	3130700	5687900	0	5401800	1	1	2				511	3398;3635	True;True	3509;3754	7385;7907;7908	7022;7530	7022;7530
SPBC1604.21c|ptr3|II|ubiquitin	SPBC1604.21c|ptr3|II|ubiquitin	2	2	2	>SPBC1604.21c|ptr3|II|ubiquitin activating enzyme E1	1	2	2	2	1	2	1	2	1	2	2.1	2.1	2.1	112.95	1012	1012	0	9.2245	By MS/MS	By MS/MS	1.2	2.1	10325000	6778600	3546000	6778600	0	1	2	3				512	373;2015	True;True	384;2060	825;826;4249	779;780;4029	779;4029
SPBC1652.02|SPBC1652.02|II|APC	SPBC1652.02|SPBC1652.02|II|APC	1	1	1	>SPBC1652.02|SPBC1652.02|II|APC amino acid transmembrane transporter (predicted)	1	1	1	1	1	0	1	0	1	0	1.9	1.9	1.9	65.277	594	594	0	3.285	By MS/MS	By matching	1.9	0	1410600	1410600	0	1410600	0	1	0	1				513	4283	TRUE	4420	9298	8831	8831
SPBC1677.03c|tda1|II|threonine	SPBC1677.03c|tda1|II|threonine	1	1	1	>SPBC1677.03c|tda1|II|threonine ammonia-lyase Tda1	1	1	1	1	1	1	1	1	1	1	2.7	2.7	2.7	66.543	600	600	0	4.3985	By MS/MS	By MS/MS	2.7	2.7	11431000	5009300	6421400	0	6098300	1	1	2				514	2683	TRUE	2757	5612;5613	5337;5338	5338
SPBC1683.03c|SPBC1683.03c|II|transmembrane	SPBC1683.03c|SPBC1683.03c|II|transmembrane	1	1	1	>SPBC1683.03c|SPBC1683.03c|II|transmembrane transporter (predicted)	1	1	1	1	0	1	0	1	0	1	3.9	3.9	3.9	56.954	519	519	0	2.8411	By matching	By MS/MS	0	3.9	2553900	0	2553900	0	2425400	0	1	1				515	320	TRUE	331	731	691	691
SPBC1685.09|rps29|II|40S	SPBC1685.09|rps29|II|40S	2	2	2	>SPBC1685.09|rps29|II|40S ribosomal protein S29 (predicted)	1	2	2	2	2	2	2	2	2	2	37.5	37.5	37.5	6.6575	56	56	0	6.2996	By MS/MS	By MS/MS	37.5	37.5	26378000	15200000	11178000	0	10616000	2	2	4				516	170;1121	True;True	178;1153	457;458;2329;2330	421;422;2195;2196	421;2196
SPBC1685.10|rps27|II|40S	SPBC1685.10|rps27|II|40S	2	2	2	>SPBC1685.10|rps27|II|40S ribosomal protein S27 (predicted)	1	2	2	2	2	2	2	2	2	2	27.7	27.7	27.7	9.1718	83	83	0	8.3135	By MS/MS	By MS/MS	27.7	27.7	35334000	6282200	29052000	0	15692000	2	3	5				517	3948;4871	True;True	4080;5032;5033	8639;8640;10588;10589;10590	8213;8214;10047;10048;10049	8213;10047	114	16
SPBC1685.13|fhn1|II|plasma	SPBC1685.13|fhn1|II|plasma	2	2	2	>SPBC1685.13|fhn1|II|plasma membrane organization protein Fhn1	1	2	2	2	1	2	1	2	1	2	21.3	21.3	21.3	20.273	183	183	0	10.293	By matching	By MS/MS	15.8	21.3	7406200	3483500	3922700	0	3725300	0	2	2				518	3808;4405	True;True	3934;4544	8363;9537;9538	7965;9061	7965;9061
SPBC1685.15c|klp6|II|kinesin-like	SPBC1685.15c|klp6|II|kinesin-like	2	2	2	>SPBC1685.15c|klp6|II|kinesin-like protein Klp6	1	2	2	2	1	1	1	1	1	1	3.3	3.3	3.3	87.795	784	784	0	3.8842	By MS/MS	By MS/MS	1.7	1.7	6541300	3432100	3109200	3432100	0	1	1	2				519	2659;4281	True;True	2731;4418	5570;9295	5298;8828	5298;8828
SPBC16A3.12c|SPBC16A3.12c|II|triglyceride	SPBC16A3.12c|SPBC16A3.12c|II|triglyceride	3	3	3	>SPBC16A3.12c|SPBC16A3.12c|II|triglyceride lipase-cholesterol esterase (predicted)	1	3	3	3	3	1	3	1	3	1	7.4	7.4	7.4	51.547	443	443	0	9.2495	By MS/MS	By MS/MS	7.4	2.5	13774000	10250000	3524600	10250000	0	3	1	4				520	763;1500;4563	True;True;True	788;1536;4711	1624;3172;9925;9926	1537;2985;9418;9419	1537;2985;9419
SPBC16A3.15c|nda2|II|tubulin	SPBC16A3.15c|nda2|II|tubulin	5	5	3	>SPBC16A3.15c|nda2|II|tubulin alpha 1	1	5	5	3	4	3	4	3	3	1	15.2	15.2	9.5	51.152	455	455	0	11.351	By MS/MS	By MS/MS	12.7	7.7	48693000	27506000	21187000	24069000	23558000	4	2	6				521	1011;2591;3418;3472;4053	True;True;True;True;True	1042;2661;3529;3585;4186	2120;2121;5438;7432;7532;8854;8855	2006;5167;7065;7166;8417;8418	2006;5167;7065;7166;8418
SPBC16C6.07c|rpt1|II|19S	SPBC16C6.07c|rpt1|II|19S	3	3	3	>SPBC16C6.07c|rpt1|II|19S proteasome regulatory subunit Rpt1 (predicted)	1	3	3	3	2	3	2	3	2	3	5.9	5.9	5.9	48.965	438	438	0	4.9431	By MS/MS	By MS/MS	5.7	5.9	15803000	6762900	9040000	8794500	6553500	1	3	4				522	2480;3028;4735	True;True;True	2544;3107;4892	5208;6291;6292;10311;10312	4940;5982;5983;9781	4940;5982;9781
SPBC16C6.09|ogm4|II|protein	SPBC16C6.09|ogm4|II|protein	5	5	5	>SPBC16C6.09|ogm4|II|protein O-mannosyltransferase Ogm4	1	5	5	5	5	4	5	4	5	4	7.2	7.2	7.2	90.09	778	778	0	13.541	By MS/MS	By MS/MS	7.2	6	27886000	20379000	7506100	16327000	11181000	4	4	8				523	1858;2846;4111;4169;5153	True;True;True;True;True	1901;2921;4244;4302;5320	3945;3946;5939;5940;8971;9083;9084;11116;11117	3741;3742;5647;5648;8533;8634;10566;10567	3742;5647;8533;8634;10566
SPBC16C6.13c|sec27|II|coatomer	SPBC16C6.13c|sec27|II|coatomer	8	8	8	>SPBC16C6.13c|sec27|II|coatomer beta subunit (predicted)	1	8	8	8	8	7	8	7	8	7	13.8	13.8	13.8	89.802	796	796	0	28.58	By MS/MS	By MS/MS	13.8	12.2	95048000	46322000	48726000	47552000	45044000	6	5	11				524	332;812;1463;2367;2592;3041;3946;5416	True;True;True;True;True;True;True;True	343;841;1499;2423;2662;3120;4078;5589	752;753;1722;3095;3096;4963;4964;5439;5440;6317;6318;8635;8636;11753;11754	712;713;1631;2915;4713;5168;5169;6010;6011;8210;8211;11187	712;1631;2915;4713;5169;6011;8211;11187
SPBC16D10.06|zrt1|II|ZIP	SPBC16D10.06|zrt1|II|ZIP	8	8	8	>SPBC16D10.06|zrt1|II|ZIP zinc transmembrane transporter Zrt1	1	8	8	8	8	8	8	8	8	8	31.1	31.1	31.1	45.271	408	408	0	70.356	By MS/MS	By MS/MS	31.1	31.1	1776000000	1037600000	738420000	755990000	538750000	16	17	33				525	569;1227;2526;2634;2635;3508;4481;5246	True;True;True;True;True;True;True;True	586;1260;1261;2593;2594;2704;2705;3623;4625;5415	1226;1227;2537;2538;2539;2540;2541;2542;2543;2544;2545;2546;2547;2548;5304;5305;5306;5307;5505;5506;5507;5508;7612;7613;9741;9742;11397;11398	1153;1154;2398;2399;2400;2401;2402;2403;2404;2405;2406;2407;2408;2409;2410;5037;5038;5039;5040;5233;5234;5235;5236;5237;7247;7248;9249;9250;9251;10855;10856;10857;10858	1154;2406;5040;5234;5236;7248;9250;10858	115;116	170;304
SPBC16D10.08c|hsp104|II|heat	SPBC16D10.08c|hsp104|II|heat	13	13	13	>SPBC16D10.08c|hsp104|II|heat shock protein Hsp104	1	13	13	13	13	11	13	11	13	11	19.1	19.1	19.1	100.51	905	905	0	34.642	By MS/MS	By MS/MS	19.1	15.4	123470000	78631000	44843000	69182000	52035000	15	10	25				526	21;329;689;1063;1392;2286;2754;2888;2962;3469;4086;5174;5241	True;True;True;True;True;True;True;True;True;True;True;True;True	22;340;710;1094;1428;2341;2828;2964;3041;3582;4219;5341;5410	36;37;38;39;40;748;749;1469;2220;2221;2964;2965;4804;4805;5761;5762;6023;6024;6169;7527;7528;8925;8926;11150;11151;11389;11390	34;35;36;37;38;708;709;1389;2094;2095;2790;2791;4559;4560;5473;5474;5727;5728;5867;7161;7162;8490;10602;10846;10847;10848	36;708;1389;2095;2791;4560;5474;5727;5867;7161;8490;10602;10847
SPCC1259.01c|rps1802|III|40S;SPBC16D10.11c|rps1801|II|40S	SPCC1259.01c|rps1802|III|40S;SPBC16D10.11c|rps1801|II|40S	7;7	7;7	7;7	>SPCC1259.01c|rps1802|III|40S ribosomal protein S18 (predicted);>SPBC16D10.11c|rps1801|II|40S ribosomal protein S18 (predicted)	2	7	7	7	6	5	6	5	6	5	41.4	41.4	41.4	17.435	152	152;152	0	17.131	By MS/MS	By MS/MS	40.8	29.6	249520000	135120000	114400000	125530000	118230000	6	6	12				527	140;2216;2864;3815;3959;4127;4923	True;True;True;True;True;True;True	148;2268;2939;3942;4091;4260;5086	404;405;4656;4657;5973;8386;8661;8662;9002;9003;10685	373;374;4413;4414;5679;7985;8234;8235;8236;8559;8560;10146	373;4414;5679;7985;8234;8559;10146
SPBC16E9.05|erg6|II|sterol	SPBC16E9.05|erg6|II|sterol	2	2	2	>SPBC16E9.05|erg6|II|sterol 24-C-methyltransferase Erg6	1	2	2	2	2	2	2	2	2	2	4.2	4.2	4.2	42.867	378	378	0	3.0981	By MS/MS	By MS/MS	4.2	4.2	15508000	6386200	9121800	6344100	8704800	2	2	4				528	1773;5399	True;True	1816;5572	3778;3779;11724;11725	3577;3578;11162;11163	3577;11162
SPBC16E9.14c|zrg17|II|cation	SPBC16E9.14c|zrg17|II|cation	2	2	2	>SPBC16E9.14c|zrg17|II|cation diffusion family zinc transmembrane transporter Zrg17	1	2	2	2	2	1	2	1	2	1	6	6	6	43.089	386	386	0	7.0795	By MS/MS	By MS/MS	6	3.4	10748000	6207500	4540500	6207500	0	1	2	3				529	1080;4615	True;True	1112;4766	2254;10032;10033	2125;9521;9522;9523	2125;9522
SPBC16G5.05c|scs2|II|VAP	SPBC16G5.05c|scs2|II|VAP	2	2	2	>SPBC16G5.05c|scs2|II|VAP family protein Scs2	1	2	2	2	2	2	2	2	2	2	8.6	8.6	8.6	41.234	383	383	0	5.731	By MS/MS	By MS/MS	8.6	8.6	36177000	18974000	17203000	19214000	16098000	2	2	4				530	622;980	True;True	642;1010	1345;1346;2056;2057	1267;1268;1942;1943	1268;1942
SPBC16G5.14c|rps3|II|40S	SPBC16G5.14c|rps3|II|40S	9	9	9	>SPBC16G5.14c|rps3|II|40S ribosomal protein S3 (predicted)	1	9	9	9	8	8	8	8	8	8	38.6	38.6	38.6	27.553	249	249	0	35.854	By MS/MS	By MS/MS	35.3	33.3	292530000	155140000	137400000	151590000	134030000	9	10	19				531	432;993;997;1143;1145;2245;2803;3867;4100	True;True;True;True;True;True;True;True;True	445;1024;1028;1175;1177;2299;2877;3995;4233	939;940;941;942;2075;2082;2083;2369;2370;2375;2376;4718;4719;5854;5855;8480;8952;8953	880;881;882;1959;1966;1967;2235;2236;2237;2241;2242;4474;4475;4476;5567;5568;8068;8516;8517	882;1959;1966;2236;2242;4476;5567;8068;8516
SPBC16H5.02|pfk1|II|6-phosphofructokinase	SPBC16H5.02|pfk1|II|6-phosphofructokinase	44	44	44	>SPBC16H5.02|pfk1|II|6-phosphofructokinase pfk1	1	44	44	44	41	43	41	43	41	43	57.1	57.1	57.1	102.55	942	942	0	247.66	By MS/MS	By MS/MS	54	57	5656000000	2679400000	2976600000	2522500000	2604100000	59	61	120				532	116;163;338;427;720;765;867;1457;1533;1688;1732;1769;1964;1968;2420;2453;2459;2466;3101;3102;3166;3167;3254;3432;3656;3731;3732;3859;3924;3929;3930;4049;4220;4360;4673;4700;4772;4952;5119;5120;5163;5356;5357;5372	True;True;True;True;True;True;True;True;True;True;True;True;True;True;True;True;True;True;True;True;True;True;True;True;True;True;True;True;True;True;True;True;True;True;True;True;True;True;True;True;True;True;True;True	123;171;349;440;743;790;791;896;1493;1569;1730;1774;1812;2008;2009;2013;2478;2515;2521;2529;3181;3182;3246;3247;3350;3543;3775;3855;3856;3987;4055;4060;4061;4182;4355;4498;4825;4826;4853;4929;5115;5286;5287;5330;5528;5529;5544	364;365;444;445;763;764;929;930;1531;1532;1533;1627;1628;1629;1630;1631;1817;1818;3083;3084;3085;3086;3243;3244;3245;3246;3601;3686;3687;3688;3689;3766;3767;3768;3769;4150;4151;4152;4153;4154;4162;4163;4164;4165;5065;5147;5148;5158;5159;5172;6432;6433;6434;6435;6436;6437;6438;6439;6575;6576;6577;6578;6579;6580;6858;6859;7456;7457;7458;7459;7945;7946;8127;8128;8129;8130;8463;8464;8589;8590;8599;86…	337;338;411;412;721;722;871;872;1445;1446;1447;1539;1540;1541;1542;1543;1720;1721;2905;2906;2907;2908;3052;3053;3054;3055;3056;3057;3400;3487;3488;3489;3490;3565;3566;3567;3568;3936;3937;3938;3939;3940;3947;3948;3949;3950;3951;4808;4883;4884;4885;4895;4910;6114;6115;6116;6117;6118;6119;6120;6254;6255;6256;6257;6258;6514;7091;7092;7093;7094;7095;7565;7566;7743;7744;7745;7746;8053;8054;8169;8170;81…	337;411;721;871;1445;1541;1720;2906;3053;3400;3487;3566;3936;3948;4808;4883;4895;4910;6114;6117;6257;6258;6514;7091;7566;7744;7746;8054;8169;8178;8180;8408;8722;8981;9629;9714;9849;10194;10498;10502;10585;11063;11067;11102	117;118;119;120;121	200;209;598;662;917
SPBC16H5.08c|SPBC16H5.08c|II|ribosome	SPBC16H5.08c|SPBC16H5.08c|II|ribosome	5	5	5	>SPBC16H5.08c|SPBC16H5.08c|II|ribosome biogenesis ATPase, Arb family ABCF2-like (predicted)	1	5	5	5	4	4	4	4	4	4	9.4	9.4	9.4	69.212	618	618	0	16.738	By MS/MS	By MS/MS	7.3	7.8	54753000	25713000	29040000	30826000	17848000	4	1	5				533	705;1244;1999;3665;4240	True;True;True;True;True	727;1279;2044;3784;4375	1498;1499;1500;2604;4220;4221;7958;7959;9214	1417;1418;2465;4003;7578;8753	1418;2465;4003;7578;8753
SPBC16H5.12c|SPBC16H5.12c|II|conserved	SPBC16H5.12c|SPBC16H5.12c|II|conserved	1	1	1	>SPBC16H5.12c|SPBC16H5.12c|II|conserved fungal protein	1	1	1	1	0	1	0	1	0	1	1.4	1.4	1.4	82.52	737	737	0	2.0521	By matching	By MS/MS	0	1.4	3509600	0	3509600	0	3333000	0	1	1				534	2036	TRUE	2081	4290	4068	4068
SPBC1703.03c|syo2|II|armadillo	SPBC1703.03c|syo2|II|armadillo	1	1	1	>SPBC1703.03c|syo2|II|armadillo repeat protein, involved in nucleocytoplasmic transport Syo2 (predicted)	1	1	1	1	1	1	1	1	1	1	1.1	1.1	1.1	74.81	664	664	0.008547	1.0309	By MS/MS	By MS/MS	1.1	1.1	110520000	58772000	51750000	0	49146000	2	1	3				535	2842	TRUE	2917	5925;5926;5927	5638;5639;5640	5640
SPBC1703.07|acl1|II|ATP	SPBC1703.07|acl1|II|ATP	12	12	12	>SPBC1703.07|acl1|II|ATP citrate synthase subunit 1 (predicted)	1	12	12	12	12	11	12	11	12	11	24.9	24.9	24.9	67.203	615	615	0	177.37	By MS/MS	By MS/MS	24.9	22.9	220950000	100490000	120460000	100950000	113940000	12	9	21				536	164;516;681;823;930;1874;2819;4023;4024;4395;4621;5365	True;True;True;True;True;True;True;True;True;True;True;True	172;531;702;852;959;1917;2893;4156;4157;4534;4772;5537	446;447;1108;1453;1454;1455;1456;1738;1739;1949;1950;3985;3986;5884;5885;8793;8794;8795;8796;9519;9520;10044;10045;11641;11642	413;1036;1375;1376;1377;1378;1646;1848;3775;3776;5599;8357;8358;8359;8360;9046;9047;9533;9534;11090;11091	413;1036;1375;1646;1848;3775;5599;8358;8359;9046;9533;11091
SPBC1703.10|ypt1|II|GTPase;SPAC9E9.07c|ypt2|I|GTPase	SPBC1703.10|ypt1|II|GTPase;SPAC9E9.07c|ypt2|I|GTPase	2;1	2;1	2;1	>SPBC1703.10|ypt1|II|GTPase Ypt1;>SPAC9E9.07c|ypt2|I|GTPase Ypt2	2	2	2	2	2	2	2	2	2	2	13.3	13.3	13.3	22.816	203	203;200	0	4.1567	By MS/MS	By MS/MS	13.3	13.3	19659000	5010700	14648000	0	13911000	2	1	3				537	874;2852	True;True	903;2927	1829;1830;5949;5950	1731;1732;5657	1732;5657
SPBC1703.13c|SPBC1703.13c|II|mitochondrial	SPBC1703.13c|SPBC1703.13c|II|mitochondrial	7	7	7	>SPBC1703.13c|SPBC1703.13c|II|mitochondrial inorganic phosphate transmembrane transporter (predicted)	1	7	7	7	7	6	7	6	7	6	25.4	25.4	25.4	33.843	311	311	0	23.846	By MS/MS	By MS/MS	25.4	22.5	313050000	159250000	153790000	151150000	154160000	6	6	12				538	926;1577;2320;2356;3799;5261;5398	True;True;True;True;True;True;True	955;1614;2375;2412;3925;5430;5571	1942;1943;3377;3378;4867;4868;4941;4942;8344;8345;11425;11426;11723	1841;1842;3178;3179;4616;4617;4687;4688;7950;7951;10882;11161	1842;3178;4616;4687;7950;10882;11161
SPBC1709.02c|vrs1|II|cytoplasmic	SPBC1709.02c|vrs1|II|cytoplasmic	7	7	7	>SPBC1709.02c|vrs1|II|cytoplasmic valine-tRNA ligase Vrs1/Vas1	1	7	7	7	6	5	6	5	6	5	8.3	8.3	8.3	111.32	980	980	0	11.037	By MS/MS	By MS/MS	6.9	6.3	61404000	27880000	33524000	31165000	28552000	4	5	9				539	698;1956;2733;3332;3781;3974;5428	True;True;True;True;True;True;True	720;2000;2807;3443;3906;4106;5601	1487;4136;5722;5723;7243;8224;8225;8688;8689;11775;11776	1406;3923;5436;5437;6893;7836;8260;8261;11207	1406;3923;5437;6893;7836;8260;11207
SPBC1709.05|sks2|II|heat	SPBC1709.05|sks2|II|heat	32	32	32	>SPBC1709.05|sks2|II|heat shock protein, ribosome associated molecular chaperone Sks2	1	32	32	32	28	32	28	32	28	32	67	67	67	67.205	613	613	0	317.94	By MS/MS	By MS/MS	59.9	67	9159800000	4490100000	4669700000	4489000000	4279500000	46	45	91				540	63;66;393;433;467;543;642;1183;1986;2003;2110;2230;2231;2234;2467;3170;3493;3542;3543;3544;3560;3666;3699;3875;4038;4060;4182;4409;4603;4820;4927;5232	True;True;True;True;True;True;True;True;True;True;True;True;True;True;True;True;True;True;True;True;True;True;True;True;True;True;True;True;True;True;True;True	68;69;72;405;446;481;559;662;1215;2031;2048;2157;2282;2283;2284;2287;2530;3250;3606;3658;3659;3660;3676;3785;3786;3821;4003;4171;4193;4316;4317;4550;4754;4979;5090;5401	139;140;141;142;143;148;149;150;151;856;857;858;859;943;944;1011;1012;1173;1174;1175;1377;1378;2449;2450;4198;4226;4227;4228;4229;4427;4428;4429;4430;4685;4686;4687;4688;4689;4690;4691;4695;5173;5174;5175;5176;6586;6587;6588;7574;7681;7682;7683;7684;7685;7686;7717;7718;7719;7720;7721;7960;7961;7962;7963;7964;7965;8043;8044;8492;8493;8822;8823;8824;8825;8875;8876;9108;9109;9110;9559;9560;9561;9562…	135;136;137;138;139;144;145;146;807;808;809;810;883;884;948;949;1101;1102;1103;1298;1299;2313;2314;2315;3983;4008;4009;4010;4011;4204;4205;4206;4207;4208;4441;4442;4443;4444;4445;4446;4447;4450;4911;4912;6262;6263;7209;7312;7313;7314;7315;7345;7346;7347;7348;7579;7580;7581;7582;7583;7584;7585;7656;7657;8080;8081;8387;8388;8389;8390;8391;8392;8440;8441;8658;8659;8660;9080;9081;9082;9083;9497;9498;…	137;146;810;884;949;1103;1299;2315;3983;4011;4204;4441;4444;4450;4911;6262;7209;7312;7314;7315;7348;7581;7657;8081;8387;8441;8660;9082;9497;9943;10152;10824	122;123;124;125;126	124;408;521;562;563
SPBC1709.07|erg27|II|3-keto	SPBC1709.07|erg27|II|3-keto	1	1	1	>SPBC1709.07|erg27|II|3-keto sterol reductase Erg27 (predicted)	1	1	1	1	0	1	0	1	0	1	3.6	3.6	3.6	38.724	338	338	0.0011274	1.4006	By matching	By MS/MS	0	3.6	0	0	0	0	0	0	1	1				541	2818	TRUE	2892	5883	5598	5598
SPBC1711.06|rpl401|II|60S	SPBC1711.06|rpl401|II|60S	6	6	1	>SPBC1711.06|rpl401|II|60S ribosomal protein L4 (predicted)	1	6	6	1	6	5	6	5	1	1	24.5	24.5	4.4	39.91	363	363	0	19.777	By MS/MS	By MS/MS	24.5	20.1	119370000	51156000	68216000	51583000	64357000	7	5	12				542	615;2009;2775;2939;3390;3584	True;True;True;True;True;True	634;2054;2849;3017;3501;3703	1328;1329;4239;4240;5801;5802;6119;6120;6121;7368;7369;7794	1252;1253;4019;4020;5515;5516;5820;5821;5822;7008;7009;7421	1252;4019;5516;5821;7009;7421
SPBC1711.08|aha1|II|chaperone	SPBC1711.08|aha1|II|chaperone	1	1	1	>SPBC1711.08|aha1|II|chaperone activator Aha1 (predicted)	1	1	1	1	1	1	1	1	1	1	2.4	2.4	2.4	37.419	336	336	0	2.7913	By MS/MS	By MS/MS	2.4	2.4	2126900	0	2126900	0	2019900	1	1	2				543	4849	TRUE	5010	10547;10548	10005;10006	10005
SPBC1711.13|his2|II|histidinol	SPBC1711.13|his2|II|histidinol	17	17	17	>SPBC1711.13|his2|II|histidinol dehydrogenase His2 (predicted)	1	17	17	17	16	16	16	16	16	16	45.1	45.1	45.1	47.553	439	439	0	79.326	By MS/MS	By MS/MS	45.1	43.3	950800000	492500000	458290000	467440000	460290000	21	19	40				544	2;218;359;618;1468;2034;2051;2520;2718;3311;3596;4196;4462;4665;4666;4792;5307	True;True;True;True;True;True;True;True;True;True;True;True;True;True;True;True;True	2;226;370;638;1504;2079;2096;2587;2792;3420;3715;4331;4605;4817;4818;4950;5477	3;4;544;545;799;800;1335;1336;3105;3106;4286;4287;4314;4315;5291;5292;5293;5294;5689;5690;7192;7829;7830;9134;9135;9136;9695;9696;10133;10134;10135;10136;10137;10421;10422;10423;10424;11520;11521;11522;11523	3;4;509;510;757;758;1260;1261;2925;2926;4065;4094;4095;5022;5023;5024;5025;5026;5407;5408;6846;7453;7454;8682;8683;8684;9202;9203;9613;9614;9615;9616;9617;9879;9880;9881;10974;10975;10976;10977	4;510;757;1261;2926;4065;4094;5026;5408;6846;7454;8682;9203;9613;9617;9880;10976
SPBC1734.04|anp1|II|mannosyltransferase	SPBC1734.04|anp1|II|mannosyltransferase	3	3	3	>SPBC1734.04|anp1|II|mannosyltransferase complex subunit, Anp family (predicted)	1	3	3	3	2	3	2	3	2	3	9.1	9.1	9.1	48.99	430	430	0	2.8368	By MS/MS	By MS/MS	6	9.1	12964000	5958700	7005200	7080600	5530900	2	1	3				545	586;598;4810	True;True;True	605;617;4969	1266;1289;1290;10465;10466	1193;1215;9926	1193;1215;9926
SPBC1734.08|hse1|II|STAM	SPBC1734.08|hse1|II|STAM	3	3	3	>SPBC1734.08|hse1|II|STAM like protein Hse1	1	3	3	3	3	1	3	1	3	1	8.6	8.6	8.6	42.497	373	373	0	5.422	By MS/MS	By MS/MS	8.6	5.6	9392400	6310700	3081700	6310700	0	4	1	5				546	2619;3839;5079	True;True;True	2689;3967;5244	5481;5482;8431;10966	5210;5211;5212;8021;10417	5212;8021;10417
SPBC1734.11|mas5|II|DNAJ	SPBC1734.11|mas5|II|DNAJ	8	8	8	>SPBC1734.11|mas5|II|DNAJ domain protein Mas5 (predicted)	1	8	8	8	7	8	7	8	7	8	27.3	27.3	27.3	44.821	407	407	0	27.184	By MS/MS	By MS/MS	22.1	27.3	501550000	145820000	355730000	187100000	296550000	5	10	15				547	493;716;1242;1809;2326;3203;4899;5045	True;True;True;True;True;True;True;True	508;739;1277;1852;2382;3283;5061;5210	1063;1064;1522;1523;2601;3849;3850;3851;3852;4877;4878;6651;6652;10638;10639;10904;10905	994;995;1437;2462;3648;3649;3650;3651;3652;4625;6323;6324;10098;10356;10357	995;1437;2462;3648;4625;6323;10098;10357
SPBC1734.16c|pst3|II|SIN3	SPBC1734.16c|pst3|II|SIN3	3	3	3	>SPBC1734.16c|pst3|II|SIN3 family co-repressor Pst3	1	3	3	3	3	2	3	2	3	2	2.9	2.9	2.9	132.88	1154	1154	0	4.0286	By MS/MS	By MS/MS	2.9	2.2	6983300	3662100	3321200	0	3154100	2	1	3				548	909;1274;4174	True;True;True	938;1309;4307	1908;1909;2656;9094;9095	1809;2511;8643;8644	1809;2511;8643
SPBC1773.01|far8|II|SIP/FAR	SPBC1773.01|far8|II|SIP/FAR	4	4	4	>SPBC1773.01|far8|II|SIP/FAR complex striatin subunit, Far8/Csc3	1	4	4	4	3	3	3	3	3	3	12.3	12.3	12.3	69.494	612	612	0	22.196	By MS/MS	By MS/MS	9.8	7.4	20171000	13172000	6998800	10367000	9451400	3	3	6				549	431;527;842;1630	True;True;True;True	444;542;871;1669	937;938;1128;1775;3482;3483	878;879;1058;1679;3283;3284	879;1058;1679;3283
SPBC1773.09c|mug184|II|Hsp70	SPBC1773.09c|mug184|II|Hsp70	2	2	2	>SPBC1773.09c|mug184|II|Hsp70 protein binding protein Mug184	1	2	2	2	2	2	2	2	2	2	6.9	6.9	6.9	63.757	551	551	0	3.5831	By MS/MS	By MS/MS	6.9	6.9	23610000	12404000	11206000	12392000	10655000	2	1	3				550	2791;4205	True;True	2865;4340	5831;5832;9148;9149	5545;5546;8698	5545;8698
SPBC1773.10c|nrs1|II|cytoplasmic	SPBC1773.10c|nrs1|II|cytoplasmic	10	10	10	>SPBC1773.10c|nrs1|II|cytoplasmic asparagine-tRNA ligase Nrs1 (predicted)	1	10	10	10	8	8	8	8	8	8	19.2	19.2	19.2	63.869	568	568	0	26.893	By MS/MS	By MS/MS	16.5	14.8	77933000	28711000	49223000	34346000	41111000	7	8	15				551	616;1216;1266;1938;2256;2257;2918;3357;3397;4345	True;True;True;True;True;True;True;True;True;True	635;1249;1301;1982;2311;2312;2996;3468;3508;4483	1330;1331;2514;2515;2642;2643;4100;4101;4754;4755;4756;6077;6078;7294;7384;9420	1254;1255;2380;2381;2498;2499;3889;4512;4513;4514;5781;5782;6937;7021;8950	1255;2381;2499;3889;4512;4514;5782;6937;7021;8950
SPBC1778.06c|fim1|II|fimbrin	SPBC1778.06c|fim1|II|fimbrin	3	3	3	>SPBC1778.06c|fim1|II|fimbrin	1	3	3	3	3	1	3	1	3	1	7	7	7	68.617	614	614	0	7.4395	By MS/MS	By MS/MS	7	1.8	6661800	6661800	0	6661800	0	3	1	4				552	738;1987;4745	True;True;True	762;2032;4902	1573;4199;4200;10327	1485;3984;3985;9795	1485;3984;9795
SPBC17A3.04c|rar1|II|cytoplasmic	SPBC17A3.04c|rar1|II|cytoplasmic	14	14	14	>SPBC17A3.04c|rar1|II|cytoplasmic methionine-tRNA ligase Mrs1 (predicted)	1	14	14	14	13	12	13	12	13	12	23.9	23.9	23.9	88.88	782	782	0	66.422	By MS/MS	By MS/MS	22.9	19.7	280690000	122610000	158070000	140760000	131980000	12	11	23				553	1707;1895;1979;2057;3012;3055;3373;3644;3722;3778;4047;4589;5015;5139	True;True;True;True;True;True;True;True;True;True;True;True;True;True	1749;1938;2024;2102;3091;3135;3484;3763;3845;3902;4180;4738;5179;5306	3634;3635;3636;4021;4183;4184;4325;4326;6263;6264;6343;6344;7337;7338;7922;7923;8093;8216;8217;8842;8843;9971;9972;10849;11093;11094	3432;3433;3434;3435;3812;3967;3968;4107;4108;5954;6034;6975;6976;7544;7545;7704;7830;7831;8404;8405;9463;10303;10543	3432;3812;3968;4107;5954;6034;6976;7545;7704;7830;8404;9463;10303;10543
SPBC17A3.05c|SPBC17A3.05c|II|DNAJ/DUF1977	SPBC17A3.05c|SPBC17A3.05c|II|DNAJ/DUF1977	1	1	1	>SPBC17A3.05c|SPBC17A3.05c|II|DNAJ/DUF1977 DNAJB12 homolog (predicted)	1	1	1	1	1	0	1	0	1	0	2.7	2.7	2.7	46.399	403	403	0	2.5175	By MS/MS	By matching	2.7	0	5696300	5696300	0	5696300	0	1	0	1				554	124	TRUE	132	379	351	351
SPBC17D11.01|nep1|II|NEDD8	SPBC17D11.01|nep1|II|NEDD8	1	1	1	>SPBC17D11.01|nep1|II|NEDD8 protease Nep1	1	1	1	1	1	0	1	0	1	0	4.3	4.3	4.3	47.257	420	420	0	5.8358	By MS/MS	By matching	4.3	0	1901100	1901100	0	1901100	0	1	0	1				555	3609	TRUE	3728	7858	7484	7484
SPBC17D11.04c|nto1|II|histone	SPBC17D11.04c|nto1|II|histone	1	1	1	>SPBC17D11.04c|nto1|II|histone acetyltransferase complex subunit Nto1 (predicted)	1	1	1	1	0	1	0	1	0	1	1.8	1.8	1.8	88.256	767	767	0	1.7607	By matching	By MS/MS	0	1.8	0	0	0	0	0	0	1	1				556	4080	TRUE	4213	8914	8479	8479
SPBC17D11.05|tif32|II|translation	SPBC17D11.05|tif32|II|translation	16	16	16	>SPBC17D11.05|tif32|II|translation initiation factor eIF3a	1	16	16	16	13	16	13	16	13	16	21.9	21.9	21.9	107.07	932	932	0	47.748	By MS/MS	By MS/MS	18.3	21.9	230850000	106720000	124130000	115510000	109100000	12	13	25				557	103;331;344;352;1357;1515;1713;1788;2522;2538;2929;3307;3314;3818;4013;4616	True;True;True;True;True;True;True;True;True;True;True;True;True;True;True;True	110;342;355;363;1393;1551;1755;1831;2589;2606;3007;3416;3423;3945;4146;4767	342;343;751;773;774;788;789;2817;3206;3207;3646;3647;3805;3806;5297;5298;5338;5339;6100;6101;7187;7188;7196;7197;8391;8392;8771;8772;10034	317;318;711;730;731;745;746;2662;3020;3445;3446;3606;3607;3608;5028;5029;5030;5071;5072;5803;6842;6849;7988;8336;8337;9524	318;711;731;746;2662;3020;3446;3607;5030;5071;5803;6842;6849;7988;8336;9524
SPBC17D11.07c|rpn2|II|19S	SPBC17D11.07c|rpn2|II|19S	8	8	8	>SPBC17D11.07c|rpn2|II|19S proteasome regulatory subunit Rpn2 (predicted)	1	8	8	8	7	5	7	5	7	5	8.4	8.4	8.4	107.28	965	965	0	11.483	By MS/MS	By MS/MS	7.3	5.4	42060000	20953000	21107000	21815000	19183000	7	3	10				558	727;1350;1723;2595;2685;3053;3074;3135	True;True;True;True;True;True;True;True	751;1386;1765;2665;2759;3133;3154;3215	1548;1549;2804;3665;5443;5616;5617;6340;6385;6386;6508;6509	1462;1463;2648;3465;5172;5341;6032;6073;6187;6188	1462;2648;3465;5172;5341;6032;6073;6188
SPBC17F3.02|nak1|II|PAK-related	SPBC17F3.02|nak1|II|PAK-related	4	4	4	>SPBC17F3.02|nak1|II|PAK-related kinase Nak1	1	4	4	4	4	2	4	2	4	2	7.5	7.5	7.5	71.119	652	652	0	14.544	By MS/MS	By MS/MS	7.5	4	27518000	22888000	4629800	19557000	7728400	6	2	8				559	1252;1880;2159;3283	True;True;True;True	1287;1923;2208;3387	2617;2618;3996;4538;4539;6945	2477;2478;3785;3786;3787;4303;4304;6604	2478;3786;4303;6604
SPBC17G9.03c|krs1|II|cytoplasmic	SPBC17G9.03c|krs1|II|cytoplasmic	3	3	3	>SPBC17G9.03c|krs1|II|cytoplasmic lysine-tRNA ligase Krs1 (predicted)	1	3	3	3	2	3	2	3	2	3	5.4	5.4	5.4	67.493	591	591	0	3.0509	By MS/MS	By MS/MS	3	5.4	20821000	7091000	13730000	0	13039000	1	2	3				560	50;1478;1949	True;True;True	51;1514;1993	100;101;3132;4121;4122	99;2948;3907;3908;3909	99;2948;3907
SPBC17G9.04c|nup85|II|nucleoporin	SPBC17G9.04c|nup85|II|nucleoporin	1	1	1	>SPBC17G9.04c|nup85|II|nucleoporin Nup85	1	1	1	1	1	1	1	1	1	1	1.8	1.8	1.8	78.021	675	675	0.0043956	1.1946	By MS/MS	By MS/MS	1.8	1.8	10553000	6149000	4403500	0	4182000	1	1	2				561	804	TRUE	831	1703;1704	1613;1614	1614
SPBC17G9.06c|SPBC17G9.06c|II|siderophore-iron	SPBC17G9.06c|SPBC17G9.06c|II|siderophore-iron	8	8	8	>SPBC17G9.06c|SPBC17G9.06c|II|siderophore-iron biosynthesis protein (predicted)	1	8	8	8	7	7	7	7	7	7	29.6	29.6	29.6	39.775	334	334	0	19.793	By MS/MS	By MS/MS	26.9	26.6	175830000	81600000	94235000	86645000	84448000	6	8	14				562	9;1257;1494;1950;3039;3458;3840;4978	True;True;True;True;True;True;True;True	9;1292;1530;1994;3118;3569;3968;5141	16;17;2626;2627;3160;3161;4123;4124;4125;4126;6314;6315;7504;8432;10774;10775	16;17;2484;2485;2486;2975;3910;3911;3912;3913;6007;6008;7136;8022;10235;10236	17;2484;2975;3910;6008;7136;8022;10235
SPBC17G9.08c|cnt5|II|Centaurin	SPBC17G9.08c|cnt5|II|Centaurin	1	1	1	>SPBC17G9.08c|cnt5|II|Centaurin Cnt5	1	1	1	1	1	0	1	0	1	0	1.7	1.7	1.7	99.081	870	870	0	4.8098	By MS/MS	By matching	1.7	0	0	0	0	0	0	1	0	1				563	959	TRUE	988	2011	1897	1897
SPBC17G9.09|tif213|II|translation	SPBC17G9.09|tif213|II|translation	2	2	2	>SPBC17G9.09|tif213|II|translation initiation factor eIF2 gamma subunit	1	2	2	2	1	2	1	2	1	2	5.8	5.8	5.8	48.78	446	446	0	9.3808	By MS/MS	By MS/MS	3.1	5.8	30504000	16411000	14094000	0	13385000	1	2	3				564	2920;5350	True;True	2998;5522	6080;6081;11608	5784;5785;11051	5784;11051
SPBC17G9.11c|pyr1|II|pyruvate	SPBC17G9.11c|pyr1|II|pyruvate	58	58	58	>SPBC17G9.11c|pyr1|II|pyruvate carboxylase Pyr1	1	58	58	58	56	57	56	57	56	57	58.1	58.1	58.1	130.86	1185	1185	0	323.31	By MS/MS	By MS/MS	57.3	58.1	7524700000	3605900000	3918800000	3170100000	3577500000	80	74	154				565	47;61;160;444;514;525;548;923;1119;1127;1203;1232;1284;1292;1293;1330;1331;1402;1481;1592;1650;1679;1817;1914;2438;2445;2484;2485;2586;2810;2834;2844;2850;2908;3034;3168;3291;3353;3707;3925;3936;4218;4341;4414;4529;4754;4755;4797;4928;5055;5056;5076;5077;5081;5212;5217;5258;5353	True;True;True;True;True;True;True;True;True;True;True;True;True;True;True;True;True;True;True;True;True;True;True;True;True;True;True;True;True;True;True;True;True;True;True;True;True;True;True;True;True;True;True;True;True;True;True;True;True;True;True;True;True;True;True;True;True;True	48;65;66;168;457;458;529;540;564;952;1151;1159;1236;1266;1319;1327;1328;1366;1367;1438;1517;1629;1630;1689;1721;1860;1958;2499;2506;2507;2548;2549;2550;2656;2884;2909;2919;2925;2984;3113;3248;3397;3464;3829;4056;4067;4068;4353;4478;4479;4555;4675;4911;4912;4955;5091;5220;5221;5241;5242;5246;5247;5381;5386;5427;5525	94;95;130;131;132;133;134;135;136;437;438;439;440;962;963;964;965;1105;1106;1124;1125;1184;1185;1933;1934;2324;2325;2326;2342;2343;2490;2491;2555;2556;2557;2677;2678;2689;2690;2691;2692;2693;2694;2764;2765;2766;2767;2768;2982;2983;3136;3137;3402;3403;3404;3405;3520;3583;3584;3585;3586;3865;3866;4056;4057;5113;5114;5129;5130;5131;5214;5215;5216;5217;5218;5429;5430;5867;5868;5869;5870;5910;5911;593…	93;128;129;130;131;132;133;403;404;405;406;407;900;901;902;903;1033;1034;1054;1055;1113;1114;1831;1832;2189;2190;2191;2208;2209;2356;2416;2417;2418;2419;2530;2541;2542;2543;2544;2545;2610;2611;2612;2613;2614;2615;2810;2811;2952;2953;3202;3203;3204;3205;3319;3380;3381;3382;3383;3384;3665;3849;3850;4855;4856;4868;4869;4870;4945;4946;4947;4948;4949;4950;5159;5582;5583;5584;5585;5626;5627;5644;5645;5…	93;128;407;902;1033;1054;1113;1832;2189;2208;2356;2417;2530;2541;2543;2612;2614;2810;2953;3203;3319;3384;3665;3850;4855;4868;4946;4950;5159;5584;5626;5644;5655;5759;5993;6260;6625;6929;7675;8171;8194;8719;8945;9096;9353;9811;9814;9897;10154;10370;10372;10410;10414;10422;10673;10684;10877;11054	127;128;129;130;131;132;133;134;135	57;134;527;573;648;739;925;956;1121
SPBC1815.01|eno101|II|enolase	SPBC1815.01|eno101|II|enolase	19	19	19	>SPBC1815.01|eno101|II|enolase (predicted)	1	19	19	19	19	18	19	18	19	18	60.8	60.8	60.8	47.435	439	439	0	251.51	By MS/MS	By MS/MS	60.8	57.4	4088400000	1913500000	2174900000	2007800000	1971200000	26	26	52				566	3;89;90;230;462;1627;2008;2063;2501;2682;3120;3121;3287;3972;4948;5137;5272;5286;5368	True;True;True;True;True;True;True;True;True;True;True;True;True;True;True;True;True;True;True	3;96;97;239;476;1666;2053;2108;2566;2756;3200;3201;3391;3392;4104;5111;5304;5442;5456;5540	5;6;198;199;200;201;566;567;568;569;1001;1002;3475;3476;3477;3478;4237;4238;4335;4336;5245;5246;5611;6472;6473;6474;6475;6476;6477;6951;6952;6953;8684;8685;8686;10724;10725;11087;11088;11089;11090;11447;11448;11449;11450;11479;11480;11646;11647	5;6;195;196;197;526;527;528;529;936;937;3275;3276;3277;3278;3279;4018;4116;4977;4978;4979;5336;6153;6154;6155;6156;6157;6158;6159;6612;6613;6614;8255;8256;8257;8258;10185;10186;10535;10536;10537;10538;10539;10540;10900;10901;10902;10903;10904;10936;10937;11094;11095	6;195;197;527;937;3279;4018;4116;4979;5336;6154;6159;6614;8256;10185;10539;10901;10937;11095	136;137;138;139	49;116;361;370
SPBC1861.02|abp2|II|ARS	SPBC1861.02|abp2|II|ARS	1	1	1	>SPBC1861.02|abp2|II|ARS binding protein Abp2	1	1	1	1	1	1	1	1	1	1	1.9	1.9	1.9	59.628	527	527	0	2.6872	By MS/MS	By matching	1.9	1.9	2308200	1452800	855420	0	812380	1	0	1				567	3270	TRUE	3372	6913;6914	6572	6572
SPBC18E5.01|SPBC18E5.01|II|cycloisomerase	SPBC18E5.01|SPBC18E5.01|II|cycloisomerase	8	8	8	>SPBC18E5.01|SPBC18E5.01|II|cycloisomerase 2 family	1	8	8	8	7	8	7	8	7	8	45	45	45	38.22	342	342	0	39.066	By MS/MS	By MS/MS	36	45	375900000	186930000	188970000	188530000	177870000	8	9	17				568	1322;1354;1385;1454;1854;2626;4502;5335	True;True;True;True;True;True;True;True	1357;1390;1421;1490;1897;2696;4647;5506	2747;2748;2809;2810;2811;2812;2953;3077;3078;3938;3939;5492;5493;9787;9788;11578;11579	2594;2595;2654;2655;2656;2657;2780;2901;2902;3735;3736;5221;9295;9296;11023;11024;11025	2594;2656;2780;2902;3735;5221;9296;11023
SPBC18E5.02c|lcb1|II|serine	SPBC18E5.02c|lcb1|II|serine	2	2	2	>SPBC18E5.02c|lcb1|II|serine palmitoyltransferase complex subunit (predicted)	1	2	2	2	2	1	2	1	2	1	4.3	4.3	4.3	57.468	509	509	0	4.4393	By MS/MS	By MS/MS	4.3	2	6324600	3875900	2448800	3875900	0	2	1	3				569	255;629	True;True	264;649	619;1355;1356	580;1276;1277	580;1276
SPBC18E5.06|rps21|II|40S	SPBC18E5.06|rps21|II|40S	3	3	3	>SPBC18E5.06|rps21|II|40S ribosomal protein S21	1	3	3	3	2	3	2	3	2	3	47.1	47.1	47.1	9.6166	87	87	0	5.1551	By MS/MS	By MS/MS	29.9	47.1	30261000	10510000	19751000	13441000	15826000	2	2	4				570	3117;3237;4608	True;True;True	3197;3328;4759	6467;6468;6813;10018;10019	6149;6473;9507;9508	6149;6473;9508
SPBC18H10.02|lcf1|II|long-chain-fatty-acid-CoA	SPBC18H10.02|lcf1|II|long-chain-fatty-acid-CoA	6	6	6	>SPBC18H10.02|lcf1|II|long-chain-fatty-acid-CoA ligase Lcf1	1	6	6	6	5	5	5	5	5	5	11.8	11.8	11.8	75.965	676	676	0	11.21	By MS/MS	By MS/MS	8.3	10.2	78161000	27894000	50266000	28760000	46871000	5	6	11				571	1057;3306;3462;4282;4453;4866	True;True;True;True;True;True	1088;3415;3574;4419;4595;5027	2209;2210;7186;7513;9296;9297;9674;9675;10579;10580	2084;2085;6841;7146;8829;8830;9181;9182;10038;10039;10040	2085;6841;7146;8829;9182;10040
SPBC18H10.03|tif35|II|translation	SPBC18H10.03|tif35|II|translation	5	5	5	>SPBC18H10.03|tif35|II|translation initiation factor eIF3g	1	5	5	5	5	4	5	4	5	4	25.9	25.9	25.9	31.494	282	282	0	11.845	By MS/MS	By MS/MS	25.9	20.6	83400000	39218000	44182000	39955000	41221000	3	4	7				572	746;1480;4029;5053;5288	True;True;True;True;True	770;1516;4162;5218;5458	1591;1592;3135;8807;8808;10916;10917;11483;11484	1503;1504;2951;8372;10367;10939;10940	1503;2951;8372;10367;10939
SPBC18H10.04c|sce3|II|translation	SPBC18H10.04c|sce3|II|translation	2	2	2	>SPBC18H10.04c|sce3|II|translation initiation factor (predicted)	1	2	2	2	1	2	1	2	1	2	10.1	10.1	10.1	42.513	388	388	0	3.7083	By matching	By MS/MS	5.4	10.1	16238000	5988400	10250000	0	9733800	0	1	1				573	442;3822	True;True	455;3949	958;959;8399	897;7992	897;7992
SPBC18H10.12c|rpl701|II|60S	SPBC18H10.12c|rpl701|II|60S	4	4	4	>SPBC18H10.12c|rpl701|II|60S ribosomal protein L7	1	4	4	4	4	4	4	4	4	4	22.3	22.3	22.3	28.73	251	251	0	9.9694	By MS/MS	By MS/MS	22.3	22.3	29914000	13359000	16555000	13997000	15084000	4	2	6				574	1040;1946;2781;3620	True;True;True;True	1071;1990;2855;3739	2176;2177;4115;4116;5812;5813;7876;7877	2055;3902;3903;5526;5527;7501;7502	2055;3903;5527;7501
SPBC1921.01c|rpl35b|II|60S	SPBC1921.01c|rpl35b|II|60S	1	1	1	>SPBC1921.01c|rpl35b|II|60S ribosomal protein L35a (predicted)	1	1	1	1	1	1	1	1	1	1	10.2	10.2	10.2	12.187	108	108	0	6.2438	By MS/MS	By MS/MS	10.2	10.2	6744600	2720100	4024500	0	3822000	2	1	3				575	1898	TRUE	1941	4025;4026	3817;3818;3819	3819
SPBC1921.05|ape2|II|aminopeptidase	SPBC1921.05|ape2|II|aminopeptidase	5	5	5	>SPBC1921.05|ape2|II|aminopeptidase Ape2 (predicted)	1	5	5	5	4	5	4	5	4	5	8.6	8.6	8.6	99.445	882	882	0	13.984	By MS/MS	By MS/MS	7.3	8.6	61460000	28979000	32480000	35970000	23855000	4	6	10				576	154;1300;2285;2338;3893	True;True;True;True;True	162;1335;2340;2394;4021	429;2708;2709;4802;4803;4905;4906;8524;8525	396;2559;2560;4558;4651;4652;4653;4654;8107;8108	396;2559;4558;4654;8107
SPBC19C2.07|fba1|II|fructose-bisphosphate	SPBC19C2.07|fba1|II|fructose-bisphosphate	13	13	13	>SPBC19C2.07|fba1|II|fructose-bisphosphate aldolase Fba1	1	13	13	13	13	13	13	13	13	13	59.8	59.8	59.8	39.57	358	358	0	154.26	By MS/MS	By MS/MS	59.8	59.8	2443900000	1198900000	1245000000	1165600000	1185800000	22	20	42				577	406;915;996;1556;2082;3011;3861;4007;4167;4601;4911;4933;4934	True;True;True;True;True;True;True;True;True;True;True;True;True	418;944;1027;1593;2127;2128;3090;3989;4140;4300;4752;5073;5096;5097	882;883;884;885;886;1916;1917;2080;2081;3329;3330;3331;3332;4368;4369;4370;4371;4372;6258;6259;6260;6261;6262;8467;8468;8753;8754;8755;8756;9078;9079;9080;9081;10002;10003;10004;10005;10662;10663;10702;10703;10704;10705	829;830;831;832;833;1816;1963;1964;1965;3129;3130;3131;3132;4144;4145;4146;4147;4148;4149;5949;5950;5951;5952;5953;8057;8322;8323;8324;8325;8629;8630;8631;8632;9491;9492;9493;9494;10122;10123;10163;10164;10165;10166	832;1816;1965;3132;4144;5949;8057;8322;8629;9494;10122;10163;10166	140	141
SPBC19C2.15c|phs1|II|3-hydroxyacyl-CoA	SPBC19C2.15c|phs1|II|3-hydroxyacyl-CoA	1	1	1	>SPBC19C2.15c|phs1|II|3-hydroxyacyl-CoA dehydratase involved in very long-chain fatty acid elongation Phs1 (predicted)	1	1	1	1	1	1	1	1	1	1	5.3	5.3	5.3	24.036	208	208	0	1.6773	By matching	By MS/MS	5.3	5.3	5134000	1677800	3456200	0	3282300	0	1	1				578	1925	TRUE	1969	4077;4078	3867	3867
SPBC19C7.06|prs1|II|cytoplasmic	SPBC19C7.06|prs1|II|cytoplasmic	5	5	5	>SPBC19C7.06|prs1|II|cytoplasmic proline-tRNA ligase Prs1 (predicted)	1	5	5	5	4	5	4	5	4	5	11.7	11.7	11.7	78.874	716	716	0	18.355	By MS/MS	By MS/MS	10.1	11.7	47481000	21735000	25746000	22717000	23468000	4	4	8				579	2220;2380;4189;4284;5129	True;True;True;True;True	2272;2436;4324;4421;5296	4663;4664;4986;9123;9124;9299;9300;11070;11071	4420;4421;4736;8670;8671;8832;8833;10518;10519	4421;4736;8670;8833;10518
SPBC19F5.03|sac11|II|inositol	SPBC19F5.03|sac11|II|inositol	7	7	7	>SPBC19F5.03|sac11|II|inositol polyphosphate phosphatase (predicted)	1	7	7	7	7	6	7	6	7	6	14.7	14.7	14.7	68.712	598	598	0	16.964	By MS/MS	By MS/MS	14.7	13	97000000	43334000	53666000	46114000	48186000	8	5	13				580	670;1058;1213;1676;2608;2854;3435	True;True;True;True;True;True;True	691;1089;1246;1717;2678;2929;3546	1430;2211;2212;2508;2509;3574;3575;5462;5463;5953;5954;7464;7465	1350;2086;2087;2373;2374;2375;3372;5192;5193;5660;5661;7100;7101	1350;2086;2375;3372;5193;5660;7100
SPBC19F5.04|SPBC19F5.04|II|aspartate	SPBC19F5.04|SPBC19F5.04|II|aspartate	4	4	4	>SPBC19F5.04|SPBC19F5.04|II|aspartate kinase (predicted)	1	4	4	4	3	4	3	4	3	4	11.8	11.8	11.8	56.812	519	519	0	9.4233	By MS/MS	By MS/MS	7.7	11.8	33882000	13537000	20346000	13245000	19614000	2	4	6				581	1092;1695;2723;4976	True;True;True;True	1124;1737;2797;5139	2277;2278;3612;3613;5700;5701;10771	2145;2146;3409;5417;5418;10232	2145;3409;5418;10232
SPBC19G7.01c|msh2|II|MutS	SPBC19G7.01c|msh2|II|MutS	3	3	3	>SPBC19G7.01c|msh2|II|MutS protein homolog 2	1	3	3	3	3	3	3	3	3	3	3.7	3.7	3.7	109.74	982	982	0	8.426	By MS/MS	By MS/MS	3.7	3.7	19372000	11267000	8104800	9061000	9903500	3	2	5				582	3717;3831;4084	True;True;True	3839;3959;4217	8079;8080;8417;8418;8921;8922	7690;7691;8009;8486;8487	7690;8009;8487
SPBC19G7.05c|bgs1|II|1,3-beta-glucan;SPAC24C9.07c|bgs2|I|1,3-beta-glucan	SPBC19G7.05c|bgs1|II|1,3-beta-glucan	3;1	2;0	2;0	>SPBC19G7.05c|bgs1|II|1,3-beta-glucan synthase catalytic subunit Bgs1	2	3	2	2	2	1	2	0	2	0	1.7	1.3	1.3	199.67	1729	1729;1894	0	5.1095	By MS/MS	By matching	1.3	0.5	2002700	2002700	0	2002700	0	2	0	2				583	1250;4960;5048	True;True;False	1285;5123;5213	2614;10746;10909	2474;10210;10361	2474;10210;10361
SPBC19G7.14c|cog5|II|Golgi	SPBC19G7.14c|cog5|II|Golgi	2	2	2	>SPBC19G7.14c|cog5|II|Golgi transport complex subunit Cog5 (predicted)	1	2	2	2	2	2	2	2	2	2	6.1	6.1	6.1	47.518	411	411	0	3.4282	By MS/MS	By MS/MS	6.1	6.1	21369000	10960000	10409000	10810000	10035000	2	0	2				584	2674;5037	True;True	2748;5202	5600;5601;10891;10892	5327;10344;10345	5327;10344
SPBC19G7.15|nup44|II|nucleoporin	SPBC19G7.15|nup44|II|nucleoporin	9	9	9	>SPBC19G7.15|nup44|II|nucleoporin Nup44	1	9	9	9	8	9	8	9	8	9	28.8	28.8	28.8	44.483	403	403	0	22.082	By MS/MS	By MS/MS	25.8	28.8	115830000	63991000	51837000	62675000	50545000	8	6	14				585	125;624;1736;2201;2304;2925;3277;3510;4568	True;True;True;True;True;True;True;True;True	133;644;1778;2253;2359;3003;3380;3625;4716	380;381;1349;1350;3696;3697;3698;3699;4623;4838;4839;6093;6094;6929;6930;7617;7618;9934;9935	352;1271;3498;3499;3500;4384;4589;4590;5796;5797;6585;7252;7253;9426;9427	352;1271;3498;4384;4589;5797;6585;7253;9426
SPBC19G7.17|SPBC19G7.17|II|translocon	SPBC19G7.17|SPBC19G7.17|II|translocon	3	3	3	>SPBC19G7.17|SPBC19G7.17|II|translocon subunit Sec61 homolog (predicted)	1	3	3	3	1	3	1	3	1	3	8.6	8.6	8.6	52.438	475	475	0	7.663	By MS/MS	By MS/MS	3.2	8.6	19817000	10080000	9736400	0	9246500	1	3	4				586	782;1255;2903	True;True;True	809;1290;2979	1663;2623;6047;6048	1571;2482;5750;5751	1571;2482;5750
SPBC1A4.02c|leu1|II|3-isopropylmalate	SPBC1A4.02c|leu1|II|3-isopropylmalate	12	12	12	>SPBC1A4.02c|leu1|II|3-isopropylmalate dehydrogenase Leu1	1	12	12	12	11	12	11	12	11	12	51.2	51.2	51.2	39.732	371	371	0	69.177	By MS/MS	By MS/MS	48	51.2	920430000	365080000	555350000	380260000	474810000	18	22	40				587	814;998;1572;2037;2358;2482;2508;3499;4133;4390;4805;5394	True;True;True;True;True;True;True;True;True;True;True;True	843;1029;1609;2082;2414;2546;2574;3612;3613;4266;4528;4529;4964;5567	1724;1725;2084;2085;3366;3367;3368;3369;4291;4945;4946;5211;5212;5260;5261;5262;5263;7583;7584;7585;7586;7587;7588;9013;9014;9508;9509;9510;10452;10453;10454;10455;11700;11701	1633;1634;1968;1969;1970;3168;3169;3170;3171;3172;4069;4070;4691;4692;4693;4694;4943;4993;4994;4995;4996;7217;7218;7219;7220;7221;7222;7223;8568;8569;9036;9037;9038;9914;9915;9916;9917;9918;11143;11144	1633;1970;3172;4070;4693;4943;4994;7218;8569;9038;9914;11143	141;142	156;228
SPBC1A4.05|blt1|II|ubiquitin	SPBC1A4.05|blt1|II|ubiquitin	1	1	1	>SPBC1A4.05|blt1|II|ubiquitin domain-like protein Blt1	1	1	1	1	1	0	1	0	1	0	1.4	1.4	1.4	78.116	700	700	0	2.8185	By MS/MS	By matching	1.4	0	0	0	0	0	0	1	0	1				588	745	TRUE	769	1590	1502	1502
SPBC1A4.08c|cct3|II|chaperonin-containing	SPBC1A4.08c|cct3|II|chaperonin-containing	14	14	14	>SPBC1A4.08c|cct3|II|chaperonin-containing T-complex gamma subunit Cct3	1	14	14	14	13	13	13	13	13	13	36.7	36.7	36.7	58.48	528	528	0	57.245	By MS/MS	By MS/MS	34.7	34.7	228670000	117050000	111620000	120350000	102710000	12	13	25				589	450;1757;2132;2336;2424;2687;3069;3258;3767;4134;4344;4561;5073;5166	True;True;True;True;True;True;True;True;True;True;True;True;True;True	464;1800;2180;2392;2482;2761;3149;3356;3891;4267;4482;4707;5238;5333	977;978;3744;3745;4487;4488;4902;5070;5071;5620;5621;6376;6377;6869;6870;8198;8199;9015;9016;9419;9911;9912;10953;10954;11137;11138	913;914;3543;3544;4256;4257;4648;4813;4814;5344;5345;6064;6065;6522;6523;7815;8570;8571;8949;9405;9406;10404;10405;10406;10589;10590	914;3543;4256;4648;4813;5345;6064;6522;7815;8570;8949;9405;10404;10589
SPBC1A4.10c|med14|II|mediator	SPBC1A4.10c|med14|II|mediator	1	1	1	>SPBC1A4.10c|med14|II|mediator complex subunit Med14	1	1	1	1	1	0	1	0	1	0	1.1	1.1	1.1	100.83	879	879	0	2.9155	By MS/MS	By matching	1.1	0	822150	822150	0	822150	0	1	0	1				590	5180	TRUE	5347	11160	10610	10610
SPBC211.07c|ubc8|II|ubiquitin	SPBC211.07c|ubc8|II|ubiquitin	1	1	1	>SPBC211.07c|ubc8|II|ubiquitin conjugating enzyme E2 Ubc8 (predicted)	1	1	1	1	1	1	1	1	1	1	8.2	8.2	8.2	20.99	184	184	0	1.5637	By matching	By MS/MS	8.2	8.2	6274300	2190000	4084300	0	3878800	0	1	1				591	1238	TRUE	1273	2591;2592	2453	2453
SPBC215.05|gpd1|II|glycerol-3-phosphate	SPBC215.05|gpd1|II|glycerol-3-phosphate	8	8	8	>SPBC215.05|gpd1|II|glycerol-3-phosphate dehydrogenase Gpd1	1	8	8	8	8	6	8	6	8	6	31.9	31.9	31.9	41.995	385	385	0	20.305	By MS/MS	By MS/MS	31.9	23.9	140630000	85480000	55146000	70035000	67817000	8	5	13				592	982;1038;1161;2443;3213;3810;4694;5337	True;True;True;True;True;True;True;True	1012;1069;1193;2504;3293;3936;4847;5508	2059;2060;2173;2406;5125;5126;6670;6671;8368;8369;8370;10228;10229;11581;11582	1945;1946;2053;2274;4864;4865;6340;6341;7969;7970;7971;9704;11027;11028	1946;2053;2274;4864;6340;7969;9704;11027
SPBC215.08c|arg4|II|arginine	SPBC215.08c|arg4|II|arginine	4	3	3	>SPBC215.08c|arg4|II|arginine specific carbamoyl-phosphate synthase Arg4 (predicted)	1	4	3	3	3	4	2	3	2	3	5.1	4.5	4.5	127.48	1160	1160	0	16.497	By MS/MS	By MS/MS	2.8	5.1	22044000	7112100	14932000	9434700	11858000	1	3	4				593	301;2878;3145;3957	True;True;True;False	312;2953;3225;4089	702;6001;6002;6003;6525;6526;8657;8658	662;5706;5707;6204;8231;8232	662;5707;6204;8232
SPBC215.09c|erg10|II|acetyl-CoA	SPBC215.09c|erg10|II|acetyl-CoA	9	9	9	>SPBC215.09c|erg10|II|acetyl-CoA C-acetyltransferase Erg10 (predicted)	1	9	9	9	7	8	7	8	7	8	33.4	33.4	33.4	40.997	395	395	0	19.374	By MS/MS	By MS/MS	21.5	33.2	193380000	96905000	96478000	94308000	94220000	6	6	12				594	108;412;413;606;1390;2142;4861;4937;4938	True;True;True;True;True;True;True;True;True	115;424;425;625;1426;2191;5022;5100;5101	350;351;899;900;901;1311;1312;2961;2962;4505;4506;10570;10571;10709;10710	324;325;843;844;845;1236;2788;4273;4274;10029;10170;10171	324;844;845;1236;2788;4274;10029;10170;10171
SPBC215.12|cwf10|II|U5	SPBC215.12|cwf10|II|U5	1	1	1	>SPBC215.12|cwf10|II|U5 snRNP GTPase subunit Cwf10	1	1	1	1	1	1	1	1	1	1	1.2	1.2	1.2	111.31	984	984	0	2.2175	By MS/MS	By MS/MS	1.2	1.2	1749800	835440	914380	0	868380	2	1	3				595	3954	TRUE	4086	8651;8652	8224;8225;8226	8226
SPBC215.15|sec13|II|COPII-coated	SPBC215.15|sec13|II|COPII-coated	4	4	4	>SPBC215.15|sec13|II|COPII-coated vesicle component Sec13	1	4	4	4	4	4	4	4	4	4	19.2	19.2	19.2	32.568	297	297	0	7.3841	By MS/MS	By MS/MS	19.2	19.2	58650000	32003000	26647000	28441000	28868000	3	3	6				596	770;1530;4556;4769	True;True;True;True	796;1566;4702;4926	1637;1638;3238;3239;9901;9902;10377;10378	1549;1550;3048;9396;9397;9843	1549;3048;9396;9843
SPBC216.07c|tor2|II|serine/threonine	SPBC216.07c|tor2|II|serine/threonine	3	3	3	>SPBC216.07c|tor2|II|serine/threonine protein kinase Tor2	1	3	3	3	3	2	3	2	3	2	1.8	1.8	1.8	266.38	2337	2337	0	3.6906	By MS/MS	By MS/MS	1.8	1	13497000	6311500	7185800	6314000	6821800	2	2	4				597	696;1954;2758	True;True;True	718;1998;2832	1485;4132;4133;5768;5769	1404;3919;3920;5481	1404;3919;5481
SPBC21B10.03c|ath1|II|ataxin-2	SPBC21B10.03c|ath1|II|ataxin-2	1	1	1	>SPBC21B10.03c|ath1|II|ataxin-2 homolog	1	1	1	1	1	1	1	1	1	1	2.1	2.1	2.1	85.523	791	791	0	4.8668	By MS/MS	By MS/MS	2.1	2.1	8464900	4451700	4013200	0	3811300	1	1	2				598	4708	TRUE	4863	10259;10260	9732;9733	9732
SPBC21B10.04c|nrf1|II|GTPase	SPBC21B10.04c|nrf1|II|GTPase	1	1	1	>SPBC21B10.04c|nrf1|II|GTPase regulator Nrf1	1	1	1	1	1	1	1	1	1	1	10.7	10.7	10.7	13.388	122	122	0	6.1539	By MS/MS	By MS/MS	10.7	10.7	29312000	11831000	17481000	0	16601000	1	1	2				599	4258	TRUE	4394	9253;9254	8789;8790	8790
SPBC21B10.10|rps402|II|40S	SPBC21B10.10|rps402|II|40S	9	1	1	>SPBC21B10.10|rps402|II|40S ribosomal protein S4 (predicted)	1	9	1	1	9	9	1	1	1	1	28.6	4.6	4.6	29.658	262	262	0	5.4786	By MS/MS	By MS/MS	28.6	28.6	17208000	8446400	8761100	0	8320300	1	1	2				600	391;551;852;1177;1719;3067;4307;4455;5362	False;False;False;False;False;True;False;False;False	403;567;881;1209;1761;3147;4444;4598;5534	853;854;1188;1189;1791;1792;2437;2438;3657;3658;6372;6373;9346;9347;9348;9349;9681;9682;11637;11638	804;805;1117;1118;1695;1696;2301;3456;3457;6060;6061;8877;8878;8879;9188;9189;11086;11087	804;1118;1695;2301;3456;6061;8879;9189;11087
SPBC21C3.08c|car2|II|ornithine	SPBC21C3.08c|car2|II|ornithine	9	9	9	>SPBC21C3.08c|car2|II|ornithine transaminase Car2	1	9	9	9	9	7	9	7	9	7	26.9	26.9	26.9	48.247	438	438	0	31.81	By MS/MS	By MS/MS	26.9	22.4	129560000	72723000	56841000	61865000	64839000	10	8	18				601	134;175;225;731;1710;2101;4095;5354;5435	True;True;True;True;True;True;True;True;True	142;183;234;755;1752;2147;4228;5526;5608	394;467;468;557;558;1559;1560;3641;3642;4409;4410;8940;8941;11614;11792;11793	363;432;433;519;520;1473;1474;3439;3440;3441;4185;4186;8502;8503;8504;11056;11223;11224	363;433;520;1474;3440;4186;8502;11056;11224
SPBC21C3.12c|SPBC21C3.12c|II|DUF953	SPBC21C3.12c|SPBC21C3.12c|II|DUF953	1	1	1	>SPBC21C3.12c|SPBC21C3.12c|II|DUF953 thioredoxin family protein	1	1	1	1	1	1	1	1	1	1	8.9	8.9	8.9	13.932	124	124	0	1.9446	By MS/MS	By MS/MS	8.9	8.9	5432600	2817400	2615200	0	2483600	1	1	2				602	1223	TRUE	1256	2530;2531	2393;2394	2393
SPBC21C3.13|rps1901|II|40S	SPBC21C3.13|rps1901|II|40S	4	4	2	>SPBC21C3.13|rps1901|II|40S ribosomal protein S19 (predicted)	1	4	4	2	4	4	4	4	2	2	24.3	24.3	7.6	16.15	144	144	0	10.404	By MS/MS	By MS/MS	24.3	24.3	164950000	66176000	98769000	68025000	91951000	3	4	7				603	951;1259;1260;3290	True;True;True;True	980;1294;1295;3396	1995;1996;2630;2631;2632;2633;6961;6962	1883;2488;2489;2490;2491;6622;6623	1883;2489;2490;6623
SPBC21D10.09c|rkr1|II|RQC	SPBC21D10.09c|rkr1|II|RQC	2	2	2	>SPBC21D10.09c|rkr1|II|RQC complex ubiquitin-protein ligase E3 Rkr1 (predicted)	1	2	2	2	2	2	2	2	2	2	1.2	1.2	1.2	184.37	1610	1610	0	2.0119	By MS/MS	By MS/MS	1.2	1.2	10474000	5909500	4564800	5343500	4901100	1	2	3				604	2678;5343	True;True	2752;5514	5605;5606;11593;11594	5331;11038;11039	5331;11039
SPBC21D10.11c|nfs1|II|mitochondrial	SPBC21D10.11c|nfs1|II|mitochondrial	1	1	1	>SPBC21D10.11c|nfs1|II|mitochondrial cysteine desulfurase Nfs1 (predicted)	1	1	1	1	1	1	1	1	1	1	3.4	3.4	3.4	55.543	501	501	0	4.2511	By MS/MS	By MS/MS	3.4	3.4	14826000	7103600	7722300	0	7333700	1	1	2				605	3992	TRUE	4125	8725;8726	8295;8296	8295
SPBC21D10.12|hob1|II|BAR	SPBC21D10.12|hob1|II|BAR	1	1	1	>SPBC21D10.12|hob1|II|BAR adaptor protein Hob1	1	1	1	1	1	1	1	1	1	1	2.1	2.1	2.1	51.391	466	466	0.0044297	1.2452	By MS/MS	By MS/MS	2.1	2.1	9609400	0	9609400	0	9125900	1	1	2				606	2345	TRUE	2401	4919;4920	4669;4670	4669
SPBC21H7.02|taf10|II|SAGA	SPBC21H7.02|taf10|II|SAGA	1	1	1	>SPBC21H7.02|taf10|II|SAGA complex/transcription factor TFIID complex subunit Taf10	1	1	1	1	1	1	1	1	1	1	6.5	6.5	6.5	23.526	215	215	0	5.7622	By MS/MS	By matching	6.5	6.5	7516100	3765300	3750800	0	3562100	1	0	1				607	1258	TRUE	1293	2628;2629	2487	2487
SPBC21H7.03c|SPBC21H7.03c|II|acid	SPBC21H7.03c|SPBC21H7.03c|II|acid	1	1	1	>SPBC21H7.03c|SPBC21H7.03c|II|acid phosphatase (predicted)	1	1	1	1	1	1	1	1	1	1	1.7	1.7	1.7	52.758	463	463	0	1.7415	By MS/MS	By MS/MS	1.7	1.7	6692600	3848900	2843700	0	2700600	1	1	2				608	2630	TRUE	2700	5499;5500	5227;5228	5227
SPBC21H7.07c|his5|II|imidazoleglycerol-phosphate	SPBC21H7.07c|his5|II|imidazoleglycerol-phosphate	5	5	5	>SPBC21H7.07c|his5|II|imidazoleglycerol-phosphate dehydratase His5	1	5	5	5	3	5	3	5	3	5	29.6	29.6	29.6	23.52	216	216	0	15.286	By MS/MS	By MS/MS	22.7	29.6	48751000	18835000	29916000	20528000	26718000	4	5	9				609	35;1475;1760;4298;4299	True;True;True;True;True	36;1511;1803;4435;4436	70;3126;3127;3751;3752;9324;9325;9326;9327;9328	68;2942;2943;3548;3549;8856;8857;8858;8859	68;2943;3549;8856;8857
SPBC23G7.04c|nif1|II|SEL1	SPBC23G7.04c|nif1|II|SEL1	1	1	1	>SPBC23G7.04c|nif1|II|SEL1 repeat protein Nif1	1	1	1	1	1	1	1	1	1	1	2.2	2.2	2.2	75.449	681	681	0.0044793	1.3415	By MS/MS	By MS/MS	2.2	2.2	0	0	0	0	0	1	1	2				610	3996	TRUE	4130	8734;8735	8304;8305	8304
SPBC23G7.12c|rpt6|II|19S	SPBC23G7.12c|rpt6|II|19S	6	6	5	>SPBC23G7.12c|rpt6|II|19S proteasome regulatory subunit Rpt6 (predicted)	1	6	6	5	6	2	6	2	5	1	21.1	21.1	18.1	45.069	403	403	0	22.463	By MS/MS	By MS/MS	21.1	6.2	81181000	63518000	17663000	53040000	27253000	6	2	8				611	910;1561;1984;2223;4521;4814	True;True;True;True;True;True	939;1598;2029;2275;4667;4973	1910;3339;3340;4194;4195;4668;9833;10472	1810;3139;3140;3979;3980;4426;9336;9931	1810;3139;3980;4426;9336;9931
SPBC24C6.04|SPBC24C6.04|II|delta-1-pyrroline-5-carboxylate	SPBC24C6.04|SPBC24C6.04|II|delta-1-pyrroline-5-carboxylate	8	8	8	>SPBC24C6.04|SPBC24C6.04|II|delta-1-pyrroline-5-carboxylate dehydrogenase (predicted)	1	8	8	8	5	8	5	8	5	8	23.9	23.9	23.9	60.218	548	548	0	27.498	By MS/MS	By MS/MS	15.7	23.9	160190000	39282000	120910000	72388000	81717000	6	7	13				612	1917;3340;4697;4780;4880;5104;5203;5207	True;True;True;True;True;True;True;True	1961;3451;4850;4937;5042;5270;5371;5375	4064;4065;7263;10234;10235;10399;10605;10606;11021;11202;11203;11204;11211;11212	3857;6911;9709;9710;9860;10063;10064;10469;10649;10650;10651;10658;10659	3857;6911;9710;9860;10063;10469;10651;10658
SPBC25B2.09c|mrs1|II|mitochondrial	SPBC25B2.09c|mrs1|II|mitochondrial	8	8	8	>SPBC25B2.09c|mrs1|II|mitochondrial and cytoplasmic arginine-tRNA ligase Rrs1/Mrs1 (predicted)	1	8	8	8	7	5	7	5	7	5	13.4	13.4	13.4	70.689	618	618	0	45.421	By MS/MS	By MS/MS	12.1	7.8	35079000	15855000	19224000	15827000	18285000	6	5	11				613	747;1609;2202;2537;2836;3200;4110;4951	True;True;True;True;True;True;True;True	771;1647;2254;2605;2911;3280;4243;5114	1593;1594;3438;4624;4625;5337;5913;5914;6646;8970;10730;10731	1505;1506;3239;4385;4386;5070;5629;6318;8532;10192;10193	1506;3239;4386;5070;5629;6318;8532;10193
SPBC25D12.03c|mcm7|II|MCM	SPBC25D12.03c|mcm7|II|MCM	3	3	3	>SPBC25D12.03c|mcm7|II|MCM complex subunit Mcm7	1	3	3	3	3	2	3	2	3	2	4.2	4.2	4.2	85.621	760	760	0	2.2339	By MS/MS	By MS/MS	4.2	3.3	2970400	2358100	612310	2358100	0	2	1	3				614	4006;4487;4739	True;True;True	4139;4631;4896	8751;8752;9752;10318;10319	8321;9261;9786;9787	8321;9261;9786
SPBC25D12.04|suc22|II|ribonucleotide	SPBC25D12.04|suc22|II|ribonucleotide	11	11	11	>SPBC25D12.04|suc22|II|ribonucleotide reductase small subunit Suc22	1	11	11	11	9	11	9	11	9	11	37.6	37.6	37.6	45.405	391	391	0	38.108	By MS/MS	By MS/MS	29.7	37.6	184290000	75801000	108490000	88284000	90548000	9	11	20				615	695;714;914;1071;1371;1417;1585;2397;3813;5152;5278	True;True;True;True;True;True;True;True;True;True;True	717;737;943;1103;1407;1453;1622;2453;3940;5319;5448	1483;1484;1519;1520;1915;2235;2236;2843;2844;3008;3009;3392;3393;5023;8381;8382;11114;11115;11462;11463	1402;1403;1434;1435;1815;2108;2109;2687;2688;2833;2834;3194;3195;4769;7980;7981;10564;10565;10918;10919	1402;1434;1815;2108;2687;2833;3195;4769;7980;10564;10918
SPBC25H2.02|trs1|II|cytoplasmic	SPBC25H2.02|trs1|II|cytoplasmic	23	23	23	>SPBC25H2.02|trs1|II|cytoplasmic threonine-tRNA ligase Trs1 (predicted)	1	23	23	23	20	20	20	20	20	20	38.5	38.5	38.5	80.137	703	703	0	66.697	By MS/MS	By MS/MS	36.3	34.1	473200000	220960000	252240000	208020000	244210000	20	19	39				616	211;513;740;868;899;1335;1675;1694;1721;1988;2377;2566;2601;3250;3325;3522;4400;4650;4812;4813;5113;5162;5323	True;True;True;True;True;True;True;True;True;True;True;True;True;True;True;True;True;True;True;True;True;True;True	219;528;764;897;928;1371;1716;1736;1763;2033;2433;2636;2671;3343;3344;3434;3637;4539;4801;4971;4972;5279;5329;5493	534;1103;1104;1578;1579;1819;1820;1883;1884;2775;2776;3573;3610;3611;3661;3662;4201;4202;4980;4981;5394;5395;5452;6842;6843;6844;6845;7220;7221;7642;7643;9530;10101;10102;10469;10470;10471;11037;11038;11131;11132;11555	500;1031;1032;1490;1491;1492;1722;1784;1785;2621;2622;3371;3407;3408;3460;3461;3462;3986;3987;4729;4730;5125;5182;6499;6500;6501;6872;7275;7276;9055;9585;9586;9928;9929;9930;10484;10485;10582;10583;11003	500;1031;1492;1722;1785;2621;3371;3407;3461;3987;4730;5125;5182;6501;6872;7276;9055;9585;9928;9929;10484;10583;11003	143	579
SPBC25H2.05|egd2|II|nascent	SPBC25H2.05|egd2|II|nascent	3	3	3	>SPBC25H2.05|egd2|II|nascent polypeptide-associated complex alpha subunit Egd2	1	3	3	3	3	3	3	3	3	3	23.1	23.1	23.1	18.785	173	173	0	14.866	By MS/MS	By MS/MS	23.1	23.1	58379000	28455000	29924000	29978000	26895000	3	4	7				617	2260;3383;5057	True;True;True	2315;3494;5222	4760;4761;4762;4763;7357;7358;10923;10924	4517;4518;4519;6997;6998;10374;10375	4519;6997;10375
SPBC25H2.12c|cct7|II|chaperonin-containing	SPBC25H2.12c|cct7|II|chaperonin-containing	3	3	3	>SPBC25H2.12c|cct7|II|chaperonin-containing T-complex eta subunit Cct7	1	3	3	3	2	3	2	3	2	3	5.2	5.2	5.2	60.686	558	558	0	4.3302	By MS/MS	By MS/MS	3.9	5.2	14674000	7883600	6790300	7810800	6521500	2	2	4				618	1506;3751;4515	True;True;True	1542;3875;4661	3183;3184;8164;8165;9823	2997;7782;7783;9327	2997;7783;9327
SPBC25H2.16c|gga22|II|Golgi	SPBC25H2.16c|gga22|II|Golgi	3	3	3	>SPBC25H2.16c|gga22|II|Golgi localized Arf binding gamma-adaptin ortholog Gga22	1	3	3	3	3	1	3	1	3	1	8.3	8.3	8.3	59.481	533	533	0	6.493	By MS/MS	By matching	8.3	3.4	12050000	9212400	2837100	9212400	0	4	0	4				619	880;1751;4609	True;True;True	909;1794;4760	1848;3730;3731;10020	1752;1753;3531;9509	1753;3531;9509
SPBC26H8.01|thi2|II|thiazole	SPBC26H8.01|thi2|II|thiazole	9	9	9	>SPBC26H8.01|thi2|II|thiazole biosynthetic enzyme	1	9	9	9	9	9	9	9	9	9	35.1	35.1	35.1	35.274	328	328	0	46.9	By MS/MS	By MS/MS	35.1	35.1	1265100000	507520000	757620000	508230000	684830000	10	13	23				620	26;27;499;1756;2449;2545;2671;3938;4472	True;True;True;True;True;True;True;True;True	27;28;514;1799;2511;2613;2614;2744;4070;4616	52;53;54;55;1078;1079;3742;3743;5135;5136;5137;5138;5350;5351;5352;5353;5593;5594;5595;8621;8622;9720;9721	50;51;52;53;54;1006;1007;3541;3542;4874;4875;4876;4877;5083;5084;5085;5086;5321;5322;8197;8198;9229;9230	50;52;1007;3541;4875;5084;5322;8198;9230	144	256
SPBC26H8.03|cho2|II|phosphatidylethanolamine	SPBC26H8.03|cho2|II|phosphatidylethanolamine	7	7	7	>SPBC26H8.03|cho2|II|phosphatidylethanolamine N-methyltransferase Cho2	1	7	7	7	7	3	7	3	7	3	9.7	9.7	9.7	102.76	905	905	0	9.6907	By MS/MS	By MS/MS	9.7	4.4	116510000	91052000	25463000	64088000	51145000	5	3	8				621	2167;2647;3043;3188;3308;4034;4534	True;True;True;True;True;True;True	2216;2719;3122;3268;3417;4167;4680	4552;5549;5550;6321;6322;6625;6626;7189;8816;9859	4316;5279;6013;6014;6299;6843;8379;9361	4316;5279;6014;6299;6843;8379;9361
SPBC26H8.07c|nda3|II|tubulin;CON__ENSEMBL:ENSBTAP00000025008	SPBC26H8.07c|nda3|II|tubulin	3;1	3;1	3;1	>SPBC26H8.07c|nda3|II|tubulin beta Nda3	2	3	3	3	3	3	3	3	3	3	6.5	6.5	6.5	49.471	448	448;536	0	12.3	By MS/MS	By MS/MS	6.5	6.5	32369000	14146000	18223000	14029000	14977000	3	4	7				622	2565;2690;5340	True;True;True	2634;2635;2764;5511	5391;5392;5393;5627;5628;11587;11588	5123;5124;5350;5351;5352;11033;11034	5123;5350;11034	145	257
SPBC26H8.11c|SPBC26H8.11c|II|thioesterase	SPBC26H8.11c|SPBC26H8.11c|II|thioesterase	1	1	1	>SPBC26H8.11c|SPBC26H8.11c|II|thioesterase superfamily protein	1	1	1	1	0	1	0	1	0	1	8	8	8	19.59	175	175	0	2.5937	By matching	By MS/MS	0	8	0	0	0	0	0	0	1	1				623	1860	TRUE	1903	3948	3744	3744
SPBC27.08c|sua1|II|sulfate	SPBC27.08c|sua1|II|sulfate	12	12	12	>SPBC27.08c|sua1|II|sulfate adenylyltransferase	1	12	12	12	7	12	7	12	7	12	27.1	27.1	27.1	54.754	490	490	0	25.951	By MS/MS	By MS/MS	15.9	27.1	107620000	39383000	68237000	46318000	57869000	7	12	19				624	136;806;836;1783;1910;2869;2870;3060;3076;3585;4499;5060	True;True;True;True;True;True;True;True;True;True;True;True	144;833;865;1826;1953;2944;2945;3140;3156;3704;4644;5225	397;398;1706;1707;1765;1766;3795;4044;4045;5983;5984;5985;6356;6357;6388;7795;9783;9784;10927	365;366;1616;1617;1670;1671;3594;3838;3839;5690;5691;5692;6046;6047;6075;7422;9291;9292;10378	365;1617;1670;3594;3839;5690;5691;6047;6075;7422;9292;10378
SPBC27B12.03c|erg32|II|C-5	SPBC27B12.03c|erg32|II|C-5	2	2	2	>SPBC27B12.03c|erg32|II|C-5 sterol desaturase Erg32	1	2	2	2	2	1	2	1	2	1	11.2	11.2	11.2	39.063	329	329	0	9.5744	By MS/MS	By MS/MS	11.2	5.8	15167000	8139600	7027800	8139600	0	1	1	2				625	3231;3445	True;True	3318;3556	6789;6790;7483	6450;7118	6450;7118
SPBC27B12.04c|far11|II|SIP/FAR	SPBC27B12.04c|far11|II|SIP/FAR	2	2	2	>SPBC27B12.04c|far11|II|SIP/FAR complex subunit, Far11/Csc2	1	2	2	2	1	2	1	2	1	2	2.8	2.8	2.8	95.092	817	817	0	2.63	By MS/MS	By MS/MS	1.6	2.8	11577000	5791400	5785900	0	5494800	1	2	3				626	3122;4592	True;True	3202;4742	6478;6479;9980	6160;6161;9471	6161;9471
SPBC27B12.11c|pho7|II|transcription	SPBC27B12.11c|pho7|II|transcription	4	4	4	>SPBC27B12.11c|pho7|II|transcription factor Pho7	1	4	4	4	4	4	4	4	4	4	8	8	8	81.928	738	738	0	11.617	By MS/MS	By MS/MS	8	8	26407000	13917000	12490000	13489000	12290000	3	3	6				627	3271;3649;3965;4099	True;True;True;True	3373;3768;4097;4232	6915;6916;7931;7932;8672;8673;8950;8951	6573;7553;8244;8245;8514;8515	6573;7553;8244;8515
SPBC27B12.13|tom40|II|mitochondrial	SPBC27B12.13|tom40|II|mitochondrial	1	1	1	>SPBC27B12.13|tom40|II|mitochondrial TOM complex subunit Tom40 (predicted)	1	1	1	1	0	1	0	1	0	1	4.9	4.9	4.9	37.552	344	344	0.0011377	1.4317	By matching	By MS/MS	0	4.9	1755900	0	1755900	0	1667500	0	1	1				628	1114	TRUE	1146	2316	2181	2181
SPBC28E12.03|rga4|II|Rho-type	SPBC28E12.03|rga4|II|Rho-type	5	5	5	>SPBC28E12.03|rga4|II|Rho-type GTPase activating protein Rga4	1	5	5	5	4	4	4	4	4	4	8.7	8.7	8.7	104.49	933	933	0	7.6989	By MS/MS	By MS/MS	5	7.4	31520000	12663000	18857000	16619000	13953000	4	2	6				629	115;2261;3331;3530;3960	True;True;True;True;True	122;2316;3442;3646;4092	362;363;4764;7242;7658;7659;8663;8664	336;4520;6892;7289;7290;8237	336;4520;6892;7289;8237
SPBC28E12.06c|lvs1|II|beige	SPBC28E12.06c|lvs1|II|beige	3	3	3	>SPBC28E12.06c|lvs1|II|beige protein homolog Lvs1 (predicted)	1	3	3	3	2	2	2	2	2	2	1.7	1.7	1.7	295.65	2609	2609	0	5.9756	By MS/MS	By MS/MS	1.2	1.2	9227800	5120500	4107200	5120500	0	2	0	2				630	2845;3425;4967	True;True;True	2920;3536;5130	5937;5938;7442;10755	5646;7077;10218	5646;7077;10218
SPBC28F2.03|ppi1|II|cyclophilin	SPBC28F2.03|ppi1|II|cyclophilin	6	6	6	>SPBC28F2.03|ppi1|II|cyclophilin family peptidyl-prolyl cis-trans isomerase Cyp2	1	6	6	6	6	6	6	6	6	6	46.9	46.9	46.9	17.402	162	162	0	18.413	By MS/MS	By MS/MS	46.9	46.9	912230000	546860000	365370000	410850000	335360000	9	10	19				631	1739;1911;2481;2649;4052;4843	True;True;True;True;True;True	1781;1954;1955;2545;2721;4185;5003;5004	3704;3705;3706;3707;4046;4047;4048;4049;4050;4051;4052;5209;5210;5552;5553;8852;8853;10534;10535;10536	3505;3506;3507;3508;3840;3841;3842;3843;3844;3845;4941;4942;5281;5282;5283;8415;8416;9994;9995	3505;3841;4941;5281;8415;9994	146;147	59;134
SPBC29A10.01|ccr1|II|NADPH-cytochrome	SPBC29A10.01|ccr1|II|NADPH-cytochrome	3	3	3	>SPBC29A10.01|ccr1|II|NADPH-cytochrome p450 reductase	1	3	3	3	3	2	3	2	3	2	5.2	5.2	5.2	76.774	678	678	0	6.1113	By MS/MS	By MS/MS	5.2	2.9	11554000	5750800	5803500	5602900	5659500	2	1	3				632	1545;2663;5064	True;True;True	1582;2735;5229	3312;3313;5577;5578;10936	3115;5305;10385	3115;5305;10385
SPBC29A10.10c|dbl8|II|tRNA-splicing	SPBC29A10.10c|dbl8|II|tRNA-splicing	1	1	1	>SPBC29A10.10c|dbl8|II|tRNA-splicing endonuclease positive effector Dbl8	1	1	1	1	1	1	1	1	1	1	0.4	0.4	0.4	222.21	1944	1944	0	3.0168	By MS/MS	By MS/MS	0.4	0.4	1611300	703690	907610	0	861940	1	2	3				633	1893	TRUE	1936	4018;4019	3808;3809;3810	3810
SPBC29A3.01|ccc2|II|copper	SPBC29A3.01|ccc2|II|copper	1	1	1	>SPBC29A3.01|ccc2|II|copper transporting ATPase Ccc2 (predicted)	1	1	1	1	0	1	0	1	0	1	1.5	1.5	1.5	97.894	904	904	0.0044494	1.3084	By matching	By MS/MS	0	1.5	0	0	0	0	0	0	1	1				634	381	TRUE	392	837	791	791
SPBC29A3.04|rpl8|II|60S	SPBC29A3.04|rpl8|II|60S	5	5	5	>SPBC29A3.04|rpl8|II|60S ribosomal protein L7a/L8 (predicted)	1	5	5	5	4	4	4	4	4	4	21.2	21.2	21.2	28.606	259	259	0	49.995	By MS/MS	By MS/MS	17.4	16.6	65014000	39299000	25715000	34196000	29524000	4	4	8				635	3123;3486;3951;4966;5265	True;True;True;True;True	3203;3599;4083;5129;5434	6480;7559;7560;8645;8646;10754;11432;11433	6162;7194;7195;8218;8219;10217;10887;10888	6162;7194;8218;10217;10888
SPBC29A3.09c|gcn20|II|AAA	SPBC29A3.09c|gcn20|II|AAA	1	1	1	>SPBC29A3.09c|gcn20|II|AAA family ATPase Gcn20 (predicted)	1	1	1	1	1	1	1	1	1	1	2	2	2	83.761	736	736	0.0011442	1.479	By MS/MS	By MS/MS	2	2	10933000	6676300	4257100	0	4042900	1	1	2				636	2840	TRUE	2915	5921;5922	5634;5635	5635
SPBC29A3.12|rps902|II|40S	SPBC29A3.12|rps902|II|40S	9	1	1	>SPBC29A3.12|rps902|II|40S ribosomal protein S9 (predicted)	1	9	1	1	7	8	1	1	1	1	38.5	4.2	4.2	22.245	192	192	0	5.1028	By MS/MS	By MS/MS	29.7	38.5	49359000	24556000	24804000	0	23556000	1	0	1				637	987;988;1815;2005;2620;2653;2708;3251;3697	False;False;False;False;False;False;True;False;False	1018;1019;1858;2050;2690;2725;2782;3345;3346;3818	2067;2068;2069;3862;4231;4232;5483;5560;5561;5670;5671;6846;6847;6848;6849;8035;8036	1952;1953;1954;3661;3662;4013;4014;5213;5289;5290;5291;5389;5390;6502;6503;6504;6505;7648;7649	1952;1953;3662;4014;5213;5289;5390;6503;7648	67	91
SPBC29A3.18|cyt1|II|cytochrome	SPBC29A3.18|cyt1|II|cytochrome	5	5	5	>SPBC29A3.18|cyt1|II|cytochrome c1 Cyt1 (predicted)	1	5	5	5	4	5	4	5	4	5	20.8	20.8	20.8	34.34	307	307	0	171.19	By MS/MS	By MS/MS	16.6	20.8	130640000	51134000	79503000	62497000	64140000	6	6	12				638	790;791;1856;3603;4908	True;True;True;True;True	817;818;1899;3722;5070	1676;1677;1678;1679;3942;7843;7844;7845;7846;10656;10657;10658;10659	1583;1584;1585;1586;1587;3738;7467;7468;7469;7470;10117;10118;10119	1583;1586;3738;7469;10119
SPBC29B5.03c|rpl26|II|60S	SPBC29B5.03c|rpl26|II|60S	1	1	1	>SPBC29B5.03c|rpl26|II|60S ribosomal protein L26 (predicted)	1	1	1	1	1	1	1	1	1	1	5.6	5.6	5.6	14.341	126	126	0	1.6146	By MS/MS	By MS/MS	5.6	5.6	12262000	6135500	6126300	0	5818100	1	1	2				639	1286	TRUE	1321	2680;2681	2532;2533	2532
SPBC2D10.04|SPBC2D10.04|II|arrestin	SPBC2D10.04|SPBC2D10.04|II|arrestin	1	1	1	>SPBC2D10.04|SPBC2D10.04|II|arrestin Aly1 related, implicated in endocytosis	1	1	1	1	1	1	1	1	1	1	1.5	1.5	1.5	72.731	658	658	0	1.5697	By MS/MS	By MS/MS	1.5	1.5	4819900	2384000	2435800	0	2313300	1	1	2				640	2696	TRUE	2770	5641;5642	5364;5365	5365
SPBC2D10.05|exg3|II|glucan	SPBC2D10.05|exg3|II|glucan	3	3	3	>SPBC2D10.05|exg3|II|glucan 1,3-beta-glucosidase Exg3	1	3	3	3	2	2	2	2	2	2	8.4	8.4	8.4	53.701	464	464	0	3.4563	By MS/MS	By MS/MS	5.8	5.8	26395000	6882300	19513000	0	18531000	1	2	3				641	608;1693;2213	True;True;True	627;1735;2265	1315;3609;4651;4652	1239;3406;4410	1239;3406;4410
SPBC2D10.10c|fib1|II|fibrillarin,	SPBC2D10.10c|fib1|II|fibrillarin,	1	1	1	>SPBC2D10.10c|fib1|II|fibrillarin, rRNA methyltransferase	1	1	1	1	1	1	1	1	1	1	3.6	3.6	3.6	32.04	305	305	0	2.4293	By MS/MS	By matching	3.6	3.6	7281100	3779900	3501100	0	3325000	1	0	1				642	2315	TRUE	2370	4857;4858	4606	4606
SPBC2D10.14c|myo51|II|myosin	SPBC2D10.14c|myo51|II|myosin	9	9	9	>SPBC2D10.14c|myo51|II|myosin type V	1	9	9	9	7	7	7	7	7	7	6.7	6.7	6.7	167.66	1471	1471	0	23.09	By MS/MS	By MS/MS	5.3	5	64560000	30285000	34275000	39333000	23503000	7	6	13				643	38;1381;2287;4149;4208;4266;4285;4882;5298	True;True;True;True;True;True;True;True;True	39;1417;2342;4282;4343;4402;4422;5044;5468	75;2945;2946;4806;4807;9043;9156;9157;9268;9269;9301;9302;10608;11502	73;2772;2773;4561;4562;8595;8704;8705;8802;8834;8835;10066;10958	73;2773;4562;8595;8705;8802;8835;10066;10958
SPBC2F12.04|rpl1701|II|60S;SPCC364.03|rpl1702|III|60S	SPBC2F12.04|rpl1701|II|60S;SPCC364.03|rpl1702|III|60S	3;2	3;2	3;2	>SPBC2F12.04|rpl1701|II|60S ribosomal protein L17;>SPCC364.03|rpl1702|III|60S ribosomal protein L17 (predicted)	2	3	3	3	2	3	2	3	2	3	21.4	21.4	21.4	20.814	187	187;187	0	3.2911	By MS/MS	By MS/MS	16.6	21.4	37165000	17321000	19844000	17382000	18784000	2	3	5				644	1214;1906;5029	True;True;True	1247;1949;5194	2510;2511;4039;10877;10878	2376;2377;3833;10330;10331	2376;3833;10330
SPBC2F12.05c|SPBC2F12.05c|II|sterol	SPBC2F12.05c|SPBC2F12.05c|II|sterol	1	1	1	>SPBC2F12.05c|SPBC2F12.05c|II|sterol binding ankyrin repeat protein (predicted)	1	1	1	1	1	0	1	0	1	0	0.8	0.8	0.8	148.47	1310	1310	0	2.0647	By MS/MS	By matching	0.8	0	4065800	4065800	0	4065800	0	1	0	1				645	217	TRUE	225	543	508	508
SPBC2F12.14c|gua1|II|IMP	SPBC2F12.14c|gua1|II|IMP	6	6	6	>SPBC2F12.14c|gua1|II|IMP dehydrogenase Gua1	1	6	6	6	4	5	4	5	4	5	16.8	16.8	16.8	57.026	524	524	0	17.499	By MS/MS	By MS/MS	12.4	13.9	38867000	30068000	8798600	20518000	17906000	4	4	8				646	607;1045;1296;2000;2994;4681	True;True;True;True;True;True	626;1076;1331;2045;3073;4834	1313;1314;2187;2700;2701;4222;6225;6226;10169	1237;1238;2064;2551;2552;4004;5920;9648	1237;2064;2552;4004;5920;9648
SPBC2G2.02|syj1|II|inositol-polyphosphate	SPBC2G2.02|syj1|II|inositol-polyphosphate	2	2	2	>SPBC2G2.02|syj1|II|inositol-polyphosphate 5-phosphatase (synaptojanin homolog 1)	1	2	2	2	2	0	2	0	2	0	3.1	3.1	3.1	121.82	1076	1076	0	3.8452	By MS/MS	By matching	3.1	0	8527300	8527300	0	8527300	0	2	0	2				647	2138;2944	True;True	2187;3023	4499;6133	4267;5833	4267;5833
SPBC2G2.04c|mmf1|II|mitochondrial	SPBC2G2.04c|mmf1|II|mitochondrial	1	1	1	>SPBC2G2.04c|mmf1|II|mitochondrial matrix protein, YjgF family protein Mmf1	1	1	1	1	1	1	1	1	1	1	5.6	5.6	5.6	17.543	162	162	0	2.7824	By MS/MS	By MS/MS	5.6	5.6	4034300	1825900	2208400	0	2097300	1	1	2				648	2016	TRUE	2061	4250;4251	4030;4031	4031
SPBC2G2.13c|dcd1|II|deoxycytidylate	SPBC2G2.13c|dcd1|II|deoxycytidylate	5	5	5	>SPBC2G2.13c|dcd1|II|deoxycytidylate deaminase (predicted)	1	5	5	5	4	4	4	4	4	4	18.3	18.3	18.3	35.974	322	322	0	14.466	By MS/MS	By MS/MS	15.2	15.2	20400000	13179000	7221600	11578000	8459100	4	5	9				649	567;1415;2882;2983;4416	True;True;True;True;True	584;1451;2958;3062;4557	1223;3005;6012;6013;6207;6208;9579;9580;9581;9582;9583	1150;2831;5717;5718;5903;5904;9099;9100;9101;9102	1150;2831;5717;5904;9099
SPBC2G5.05|SPBC2G5.05|II|transketolase	SPBC2G5.05|SPBC2G5.05|II|transketolase	20	20	20	>SPBC2G5.05|SPBC2G5.05|II|transketolase (predicted)	1	20	20	20	19	18	19	18	19	18	39.9	39.9	39.9	75.181	685	685	0	87.022	By MS/MS	By MS/MS	37.2	35.6	709860000	302470000	407380000	296020000	393340000	22	20	42				650	1237;1848;2440;2660;3046;3066;3104;3742;3772;3826;3979;4407;4473;4478;4585;4610;4671;4858;5099;5131	True;True;True;True;True;True;True;True;True;True;True;True;True;True;True;True;True;True;True;True	1272;1891;2501;2732;3125;3146;3184;3866;3896;3953;4111;4112;4546;4617;4622;4734;4761;4823;5019;5265;5298	2588;2589;2590;3926;3927;5117;5118;5571;5572;6327;6328;6370;6371;6442;6443;8146;8207;8208;8406;8407;8698;8699;8700;9541;9542;9722;9723;9724;9725;9733;9734;9965;9966;10021;10022;10144;10564;10565;11012;11074;11075	2450;2451;2452;3724;3725;4858;4859;5299;5300;6020;6021;6058;6059;6124;6125;7761;7822;7823;7998;7999;8269;8270;8271;9063;9231;9232;9233;9234;9242;9456;9457;9458;9510;9511;9512;9623;10022;10023;10024;10459;10460;10522;10523	2452;3724;4859;5300;6021;6059;6124;7761;7823;7998;8269;9063;9233;9242;9456;9510;9623;10024;10459;10522	148	37
SPBC2G5.06c|hmt2|II|sulfide-quinone	SPBC2G5.06c|hmt2|II|sulfide-quinone	10	10	10	>SPBC2G5.06c|hmt2|II|sulfide-quinone oxidoreductase	1	10	10	10	10	8	10	8	10	8	30.3	30.3	30.3	51.574	459	459	0	41.957	By MS/MS	By MS/MS	30.3	25.1	181130000	98660000	82470000	99597000	77384000	10	8	18				651	766;953;1270;1614;2734;2768;3440;3987;5189;5284	True;True;True;True;True;True;True;True;True;True	792;982;1305;1652;2808;2842;3551;4120;5357;5454	1632;1999;2000;2649;3447;3448;5724;5725;5784;5785;7473;7474;8716;8717;11177;11178;11475;11476	1544;1886;2505;3248;3249;3250;5438;5439;5497;7108;7109;8286;8287;10625;10626;10931;10932;10933	1544;1886;2505;3249;5438;5497;7108;8287;10626;10933
SPBC30B4.03c|adn1|II|adhesion	SPBC30B4.03c|adn1|II|adhesion	1	1	1	>SPBC30B4.03c|adn1|II|adhesion defective protein	1	1	1	1	1	1	1	1	1	1	2.6	2.6	2.6	43.837	391	391	0	4.4242	By MS/MS	By MS/MS	2.6	2.6	9881400	6311200	3570300	0	3390600	1	1	2				652	679	TRUE	700	1450;1451	1372;1373	1372
SPBC30B4.04c|sol1|II|SWI/SNF	SPBC30B4.04c|sol1|II|SWI/SNF	1	1	1	>SPBC30B4.04c|sol1|II|SWI/SNF complex subunit Sol1	1	1	1	1	1	0	1	0	1	0	2.2	2.2	2.2	96.017	865	865	0	10.962	By MS/MS	By matching	2.2	0	0	0	0	0	0	1	0	1				653	3942	TRUE	4074	8629	8204	8204
SPBC30D10.05c|SPBC30D10.05c|II|sepiapterin	SPBC30D10.05c|SPBC30D10.05c|II|sepiapterin	3	3	3	>SPBC30D10.05c|SPBC30D10.05c|II|sepiapterin reductase (predicted)	1	3	3	3	2	2	2	2	2	2	17	17	17	26.645	247	247	0	8.3637	By MS/MS	By MS/MS	13.4	12.1	11811000	5672800	6137800	0	5829000	1	2	3				654	1551;3099;4115	True;True;True	1588;3179;4248	3322;6429;8978;8979	3123;6111;8539	3123;6111;8539
SPBC30D10.07c|bpl1|II|biotin-protein	SPBC30D10.07c|bpl1|II|biotin-protein	1	1	1	>SPBC30D10.07c|bpl1|II|biotin-protein ligase Bpl1 (predicted)	1	1	1	1	1	1	1	1	1	1	1.7	1.7	1.7	70.631	631	631	0	2.7222	By MS/MS	By MS/MS	1.7	1.7	6565200	3621400	2943800	0	2795700	1	1	2				655	2809	TRUE	2883	5865;5866	5580;5581	5581
SPBC30D10.13c|pdb1|II|pyruvate	SPBC30D10.13c|pdb1|II|pyruvate	4	4	4	>SPBC30D10.13c|pdb1|II|pyruvate dehydrogenase e1 component beta subunit Pdb1	1	4	4	4	4	4	4	4	4	4	17.8	17.8	17.8	39.623	366	366	0	15.142	By MS/MS	By MS/MS	17.8	17.8	57959000	33097000	24863000	33730000	22979000	4	2	6				656	67;659;834;4043	True;True;True;True	73;680;863;4176	152;153;1406;1407;1761;1762;8834;8835	147;1327;1328;1667;1668;8399	147;1327;1667;8399
SPBC31A8.01c|rtn1|II|reticulon-like	SPBC31A8.01c|rtn1|II|reticulon-like	6	6	6	>SPBC31A8.01c|rtn1|II|reticulon-like protein Rtn1	1	6	6	6	6	6	6	6	6	6	26.9	26.9	26.9	33.659	308	308	0	22.817	By MS/MS	By MS/MS	26.9	26.9	98832000	27345000	71487000	46910000	48325000	7	7	14				657	521;1714;1853;3632;3744;3940	True;True;True;True;True;True	536;1756;1896;3751;3868;4072	1116;1117;3648;3649;3936;3937;7901;7902;8149;8150;8624;8625;8626	1046;3447;3448;3733;3734;7522;7523;7763;7764;7765;7766;8200;8201;8202	1046;3447;3734;7522;7765;8202
SPBC31F10.06c|sar1|II|ADP-ribosylation	SPBC31F10.06c|sar1|II|ADP-ribosylation	4	4	4	>SPBC31F10.06c|sar1|II|ADP-ribosylation factor Sar1	1	4	4	4	3	3	3	3	3	3	28.4	28.4	28.4	21.28	190	190	0	7.2026	By MS/MS	By MS/MS	17.4	22.6	48253000	17708000	30544000	21111000	25605000	2	3	5				658	1971;2564;3257;4959	True;True;True;True	2016;2633;3355;5122	4169;4170;5390;6868;10744;10745	3954;5122;6521;10208;10209	3954;5122;6521;10209
SPBC31F10.16|cfp1|II|ChAPs	SPBC31F10.16|cfp1|II|ChAPs	2	2	2	>SPBC31F10.16|cfp1|II|ChAPs family protein Cfp1	1	2	2	2	0	2	0	2	0	2	3.2	3.2	3.2	74.094	649	649	0	2.3572	By matching	By MS/MS	0	3.2	6503700	0	6503700	0	6176400	0	2	2				659	651;1310	True;True	672;1345	1395;2728	1315;2576	1315;2576
SPBC32C12.03c|ppk25|II|serine/threonine	SPBC32C12.03c|ppk25|II|serine/threonine	2	2	2	>SPBC32C12.03c|ppk25|II|serine/threonine protein kinase Ppk25 (predicted)	1	2	2	2	2	1	2	1	2	1	5.7	5.7	5.7	47.673	423	423	0	2.49	By MS/MS	By MS/MS	5.7	2.6	10681000	8021300	2659800	8021300	0	2	0	2				660	2217;4044	True;True	2269;4177	4658;4659;8836	4415;4416;8400	4416;8400
SPBC32F12.04|gtb1|II|gamma-tubulin	SPBC32F12.04|gtb1|II|gamma-tubulin	4	4	4	>SPBC32F12.04|gtb1|II|gamma-tubulin Gtb1	1	4	4	4	3	2	3	2	3	2	16.1	16.1	16.1	49.965	446	446	0	18.064	By MS/MS	By MS/MS	14.1	6.7	12650000	9158700	3491800	9158700	0	4	1	5				661	789;3299;3903;5366	True;True;True;True	816;3408;4031;5538	1675;6983;8545;11643;11644	1582;6642;8126;8127;11092	1582;6642;8126;11092
SPBC32F12.10|SPBC32F12.10|II|phosphoglucomutase	SPBC32F12.10|SPBC32F12.10|II|phosphoglucomutase	4	4	4	>SPBC32F12.10|SPBC32F12.10|II|phosphoglucomutase (predicted)	1	4	4	4	4	3	4	3	4	3	9	9	9	60.598	554	554	0	15.575	By MS/MS	By MS/MS	9	7.4	24682000	10531000	14150000	9799100	14171000	3	3	6				662	594;1199;5229;5268	True;True;True;True	613;1232;5398;5437	1279;1280;2484;11361;11362;11438;11439	1204;1205;2350;10819;10820;10893;10894	1205;2350;10819;10894
SPBC32F12.11|tdh1|II|glyceraldehyde-3-phosphate	SPBC32F12.11|tdh1|II|glyceraldehyde-3-phosphate	27	27	16	>SPBC32F12.11|tdh1|II|glyceraldehyde-3-phosphate dehydrogenase Tdh1	1	27	27	16	27	25	27	25	16	14	75.3	75.3	42	35.869	336	336	0	233.36	By MS/MS	By MS/MS	75.3	73.2	12810000000	6060700000	6749600000	5344400000	6871100000	40	38	78				663	30;558;559;1171;1172;1452;2531;3098;3152;3153;3177;3178;3612;3863;3864;4454;4788;4830;4831;4838;4842;4847;4974;5069;5070;5170;5227	True;True;True;True;True;True;True;True;True;True;True;True;True;True;True;True;True;True;True;True;True;True;True;True;True;True;True	31;574;575;576;1203;1204;1488;2599;3178;3232;3233;3257;3258;3731;3991;3992;4596;4597;4946;4989;4990;4997;4998;5002;5008;5137;5234;5235;5337;5396	59;60;1200;1201;1202;1203;1204;1205;1206;2423;2424;2425;2426;2427;2428;3073;3074;5320;5321;5322;5323;6427;6428;6537;6538;6539;6540;6541;6542;6543;6544;6545;6546;6602;6603;6604;6605;7863;7864;8471;8472;8473;8474;9676;9677;9678;9679;9680;10414;10415;10501;10502;10503;10515;10516;10517;10518;10519;10520;10521;10522;10523;10532;10533;10542;10543;10544;10545;10765;10766;10767;10768;10945;10946;10947;1…	59;60;1127;1128;1129;1130;1131;1132;1133;1134;1135;2288;2289;2290;2291;2292;2896;2897;2898;5053;5054;5055;5056;6110;6216;6217;6218;6219;6220;6221;6222;6223;6278;6279;6280;6281;7488;7489;8059;8060;8061;8062;9183;9184;9185;9186;9187;9873;9874;9961;9962;9963;9974;9975;9976;9977;9978;9979;9980;9981;9982;9992;9993;10000;10001;10002;10003;10226;10227;10228;10229;10395;10396;10397;10398;10399;10595;1059…	59;1128;1133;2289;2292;2897;5056;6110;6219;6220;6279;6281;7489;8060;8062;9186;9873;9961;9963;9978;9992;10002;10229;10396;10397;10596;10817	149;150;151	46;130;175
SPBC32H8.12c|act1|II|actin	SPBC32H8.12c|act1|II|actin	21	21	21	>SPBC32H8.12c|act1|II|actin Act1	1	21	21	21	19	19	19	19	19	19	74.9	74.9	74.9	41.764	375	375	0	118.89	By MS/MS	By MS/MS	68	67.7	2853300000	1310600000	1542700000	1154600000	1494200000	32	30	62				664	141;355;459;460;709;718;760;936;1341;1752;1805;2366;2572;2598;3232;3654;3830;4312;4597;4679;5367	True;True;True;True;True;True;True;True;True;True;True;True;True;True;True;True;True;True;True;True;True	149;366;473;474;731;732;741;785;965;1377;1795;1848;2422;2642;2668;3319;3320;3321;3773;3958;4449;4748;4832;5539	406;793;794;995;996;997;998;1505;1506;1507;1508;1509;1510;1528;1529;1617;1618;1961;1962;2787;2788;3732;3733;3840;3841;4958;4959;4960;4961;4962;5405;5406;5407;5447;6791;6792;6793;6794;6795;6796;6797;7941;7942;8415;8416;9358;9359;9360;9361;9991;9992;9993;9994;10164;10165;10166;10167;11645	375;750;751;752;929;930;931;932;933;1423;1424;1425;1426;1427;1442;1443;1531;1532;1856;2631;3532;3533;3641;3642;4704;4705;4706;4707;4708;4709;4710;4711;4712;5135;5136;5137;5175;5176;6451;6452;6453;6454;6455;6456;6457;6458;7561;7562;8007;8008;8888;8889;8890;8891;8892;9480;9481;9482;9483;9644;9645;9646;11093	375;750;931;932;1424;1443;1531;1856;2631;3532;3642;4708;5136;5175;6457;7562;8007;8892;9482;9644;11093	152;153;154;155;156	1;16;82;190;305
SPCP20C8.01c|SPCP20C8.01c|III|mug2/mug135/meu2;SPBC337.02c|SPBC337.02c|II|mug2/mug135/meu2;SPCC569.01c|SPCC569.01c|III|mug2/mug135/meu2	SPCP20C8.01c|SPCP20C8.01c|III|mug2/mug135/meu2;SPBC337.02c|SPBC337.02c|II|mug2/mug135/meu2;SPCC569.01c|SPCC569.01c|III|mug2/mug135/meu2	3;3;3	1;1;1	1;1;1	>SPCP20C8.01c|SPCP20C8.01c|III|mug2/mug135/meu2 family;>SPBC337.02c|SPBC337.02c|II|mug2/mug135/meu2 family;>SPCC569.01c|SPCC569.01c|III|mug2/mug135/meu2 family	3	3	1	1	3	3	1	1	1	1	12.1	5.7	5.7	29.671	247	247;305;323	0	4.8295	By MS/MS	By MS/MS	12.1	12.1	28220000	13298000	14923000	0	14172000	1	1	2				665	939;2701;5144	True;False;False	968;2775;5311	1967;1968;5651;5652;11101;11102	1860;1861;5370;5371;10551;10552	1860;5370;10552
SPBC337.05c|cct8|II|chaperonin-containing	SPBC337.05c|cct8|II|chaperonin-containing	9	9	9	>SPBC337.05c|cct8|II|chaperonin-containing T-complex theta subunit Cct8	1	9	9	9	9	8	9	8	9	8	22	22	22	59.955	546	546	0	27.862	By MS/MS	By MS/MS	22	20.1	144630000	76484000	68143000	69567000	71632000	9	8	17				666	2188;2359;3246;3807;4456;4552;4638;4689;5101	True;True;True;True;True;True;True;True;True	2239;2415;3339;3933;4599;4698;4789;4842;5267	4593;4594;4947;4948;6836;8361;8362;9683;9684;9892;9893;9894;9895;10078;10079;10220;10221;11015;11016	4354;4355;4695;6493;7964;9190;9191;9192;9390;9391;9392;9563;9564;9697;9698;10463;10464	4355;4695;6493;7964;9191;9392;9564;9697;10463
SPBC337.09|erg28|II|Erg28	SPBC337.09|erg28|II|Erg28	1	1	1	>SPBC337.09|erg28|II|Erg28 protein (predicted)	1	1	1	1	0	1	0	1	0	1	10.3	10.3	10.3	15.252	136	136	0	3.7305	By matching	By MS/MS	0	10.3	2355500	0	2355500	0	1342300	0	3	3				667	4178	TRUE	4311;4312	9102;9103	8650;8651;8652	8650	157	7
SPBC337.16|cho1|II|phosphatidyl-N-dimethylethanolamine	SPBC337.16|cho1|II|phosphatidyl-N-dimethylethanolamine	2	2	2	>SPBC337.16|cho1|II|phosphatidyl-N-dimethylethanolamine N-methyltransferase	1	2	2	2	2	2	2	2	2	2	9.5	9.5	9.5	24.767	221	221	0	5.2322	By MS/MS	By MS/MS	9.5	9.5	22156000	14391000	7765400	0	7374700	1	1	2				668	683;1943	True;True	704;1987	1458;1459;4110;4111	1380;3897;3898	1380;3898
SPBC342.01c|alg6|II|glucosyltransferase	SPBC342.01c|alg6|II|glucosyltransferase	1	1	1	>SPBC342.01c|alg6|II|glucosyltransferase Alg6	1	1	1	1	0	1	0	1	0	1	1.8	1.8	1.8	59.203	506	506	0	2.0123	By matching	By MS/MS	0	1.8	0	0	0	0	0	0	1	1				669	4494	TRUE	4638	9768	9277	9277
SPBC342.02|qrs1|II|cytoplasmic	SPBC342.02|qrs1|II|cytoplasmic	1	1	1	>SPBC342.02|qrs1|II|cytoplasmic glutaminyl-tRNA ligase Qrs1 (predicted)	1	1	1	1	1	0	1	0	1	0	1	1	1	92.072	811	811	0.0085561	1.0399	By MS/MS	By matching	1	0	1053600	1053600	0	1053600	0	1	0	1				670	3219	TRUE	3299	6681	6349	6349
SPBC354.01|gtp1|II|GTP	SPBC354.01|gtp1|II|GTP	2	2	2	>SPBC354.01|gtp1|II|GTP binding protein Gtp1, implicated in cytoplasmic translation (predicted)	1	2	2	2	2	1	2	1	2	1	6.1	6.1	6.1	40.749	363	363	0	4.2725	By MS/MS	By MS/MS	6.1	3	7463800	3518800	3945000	0	3746500	2	1	3				671	1974;4661	True;True	2019;4813	4175;10126;10127	3959;9606;9607	3959;9606
SPBC354.02c|sec61|II|translocon	SPBC354.02c|sec61|II|translocon	2	2	2	>SPBC354.02c|sec61|II|translocon alpha subunit Sec61	1	2	2	2	1	2	1	2	1	2	5.8	5.8	5.8	53.253	479	479	0	12.42	By matching	By MS/MS	1.7	5.8	10820000	6155200	4664900	0	4430200	0	1	1				672	1269;1372	True;True	1304;1408	2648;2845;2846	2504;2689	2504;2689
SPBC354.12|gpd3|II|glyceraldehyde	SPBC354.12|gpd3|II|glyceraldehyde	18	7	7	>SPBC354.12|gpd3|II|glyceraldehyde 3-phosphate dehydrogenase Gpd3	1	18	7	7	18	16	7	5	7	5	63.6	27.8	27.8	35.674	335	335	0	24.954	By MS/MS	By MS/MS	63.6	57.6	192580000	157210000	35372000	126950000	63851000	9	5	14				673	30;557;1452;2244;2531;3098;3151;3176;3612;4788;4830;4838;4842;4847;4974;5071;5072;5165	False;True;False;True;False;False;True;True;False;False;False;False;False;False;False;True;True;True	31;573;1488;2298;2599;3178;3231;3256;3731;4946;4989;4997;4998;5002;5008;5137;5236;5237;5332	59;60;1198;1199;3073;3074;4715;4716;4717;5320;5321;5322;5323;6427;6428;6535;6536;6600;6601;7863;7864;10414;10415;10501;10502;10515;10516;10517;10518;10519;10520;10521;10522;10523;10532;10533;10542;10543;10544;10545;10765;10766;10767;10768;10950;10951;10952;11136	59;60;1126;2896;2897;2898;4471;4472;4473;5053;5054;5055;5056;6110;6213;6214;6215;6275;6276;6277;7488;7489;9873;9874;9961;9962;9974;9975;9976;9977;9978;9979;9980;9981;9982;9992;9993;10000;10001;10002;10003;10226;10227;10228;10229;10400;10401;10402;10403;10588	59;1126;2897;4471;5056;6110;6213;6275;7489;9873;9961;9978;9992;10002;10229;10401;10403;10588	151	175
SPBC354.14c|vac8|II|vacuolar	SPBC354.14c|vac8|II|vacuolar	1	1	1	>SPBC354.14c|vac8|II|vacuolar protein Vac8 (predicted)	1	1	1	1	1	1	1	1	1	1	2.2	2.2	2.2	60.232	550	550	0	2.3815	By MS/MS	By MS/MS	2.2	2.2	1814400	788430	1026000	0	974370	1	1	2				674	1937	TRUE	1981	4098;4099	3887;3888	3888
SPBC36.03c|mfs3|II|MFS	SPBC36.03c|mfs3|II|MFS	1	1	1	>SPBC36.03c|mfs3|II|MFS family transmembrane transporter Mfs3	1	1	1	1	0	1	0	1	0	1	2.2	2.2	2.2	59.169	538	538	0.0044346	1.2474	By matching	By MS/MS	0	2.2	0	0	0	0	0	0	1	1				675	32	TRUE	33	65	65	65
SPBC36.05c|clr6|II|histone	SPBC36.05c|clr6|II|histone	6	6	6	>SPBC36.05c|clr6|II|histone deacetylase (class I) Clr6	1	6	6	6	5	6	5	6	5	6	18	18	18	46.111	405	405	0	17.029	By MS/MS	By MS/MS	15.1	18	94835000	33416000	61419000	42517000	49228000	4	8	12				676	1220;2955;2956;3447;3809;4551	True;True;True;True;True;True	1253;3034;3035;3558;3935;4697	2523;2524;6158;6159;6160;6161;7485;7486;8364;8365;8366;8367;9890;9891	2387;2388;5856;5857;5858;5859;7120;7121;7966;7967;7968;9389	2387;5856;5859;7120;7966;9389
SPBC36.07|elp1|II|elongator	SPBC36.07|elp1|II|elongator	8	8	8	>SPBC36.07|elp1|II|elongator subunit Elp1 (predicted)	1	8	8	8	6	8	6	8	6	8	7	7	7	141.61	1253	1253	0	10.865	By MS/MS	By MS/MS	5.3	7	32066000	17019000	15046000	16538000	14771000	5	5	10				677	244;1141;1211;1418;2606;2821;3334;4731	True;True;True;True;True;True;True;True	253;1173;1244;1454;2676;2895;3445;4888	594;595;2366;2504;2505;3010;3011;5458;5459;5888;5889;7246;7247;10306	556;2233;2370;2835;2836;5189;5603;5604;6896;9776	556;2233;2370;2835;5189;5604;6896;9776
SPBC365.15|alp4|II|gamma	SPBC365.15|alp4|II|gamma	5	5	5	>SPBC365.15|alp4|II|gamma tubulin complex Spc97/GCP2 subunit Alp4	1	5	5	5	5	4	5	4	5	4	5.2	5.2	5.2	90.157	784	784	0	7.0066	By MS/MS	By MS/MS	5.2	4.3	41852000	21209000	20643000	24015000	16799000	4	4	8				678	690;1996;3218;3262;3804	True;True;True;True;True	711;2041;3298;3360;3930	1470;1471;4213;4214;6679;6680;6877;8353;8354	1390;1391;3997;6347;6348;6528;7957;7958	1390;3997;6347;6528;7957
SPBC3B8.03|lys9|II|saccharopine	SPBC3B8.03|lys9|II|saccharopine	4	4	4	>SPBC3B8.03|lys9|II|saccharopine dehydrogenase (predicted)	1	4	4	4	4	4	4	4	4	4	12.4	12.4	12.4	49.938	450	450	0	14.019	By MS/MS	By MS/MS	12.4	12.4	99700000	40952000	58747000	40205000	56539000	4	3	7				679	70;88;3606;5376	True;True;True;True	76;95;3725;5548	157;158;196;197;7849;7850;11661;11662	150;151;193;194;7473;7474;11108	151;194;7474;11108
SPBC3B9.19|mge1|II|mitochondrial	SPBC3B9.19|mge1|II|mitochondrial	2	2	2	>SPBC3B9.19|mge1|II|mitochondrial GrpE domain chaperone protein (predicted)	1	2	2	2	2	2	2	2	2	2	8.1	8.1	8.1	25.334	223	223	0	5.5619	By MS/MS	By MS/MS	8.1	8.1	11049000	5162600	5886600	0	5590400	1	1	2				680	687;4770	True;True	708;4927	1465;1466;10379;10380	1385;1386;9844	1385;9844
SPBC3D6.02|but2|II|But2	SPBC3D6.02|but2|II|But2	2	2	2	>SPBC3D6.02|but2|II|But2 family protein But2	1	2	2	2	2	2	2	2	2	2	6.2	6.2	6.2	43.625	390	390	0	3.8842	By MS/MS	By MS/MS	6.2	6.2	25795000	12063000	13732000	12557000	12547000	2	2	4				681	2614;5434	True;True	2684;5607	5472;5473;11790;11791	5202;5203;11221;11222	5202;11221
SPBC3E7.10|fma1|II|methionine	SPBC3E7.10|fma1|II|methionine	2	2	2	>SPBC3E7.10|fma1|II|methionine aminopeptidase Fma1 (predicted)	1	2	2	2	1	2	1	2	1	2	8.7	8.7	8.7	42.139	379	379	0	8.2424	By MS/MS	By MS/MS	5.3	8.7	13766000	6772000	6994000	0	6642100	1	2	3				682	177;347	True;True	185;358	471;472;781	436;437;737	437;737
SPBC3E7.16c|leu3|II|2-isopropylmalate	SPBC3E7.16c|leu3|II|2-isopropylmalate	4	4	4	>SPBC3E7.16c|leu3|II|2-isopropylmalate synthase Leu3	1	4	4	4	3	4	3	4	3	4	10.6	10.6	10.6	64.041	584	584	0	8.7872	By MS/MS	By MS/MS	8	10.6	43606000	19656000	23950000	24722000	17679000	2	2	4				683	315;1378;3312;4981	True;True;True;True	326;1414;3421;5144	722;723;2857;2858;7193;10780;10781	683;2699;6847;10242	683;2699;6847;10242
SPBC3F6.01c|SPBC3F6.01c|II|serine/threonine	SPBC3F6.01c|SPBC3F6.01c|II|serine/threonine	3	3	3	>SPBC3F6.01c|SPBC3F6.01c|II|serine/threonine protein phosphatase (predicted)	1	3	3	3	2	3	2	3	2	3	5.9	5.9	5.9	53.29	473	473	0	3.0234	By MS/MS	By MS/MS	3.8	5.9	9201600	3465100	5736400	0	5447800	1	3	4				684	1163;2907;5322	True;True;True	1195;2983;5492	2411;2412;6055;6056;11554	2277;2278;5758;11002	2277;5758;11002
SPBC3F6.02c|erg26|II|3	SPBC3F6.02c|erg26|II|3	1	1	1	>SPBC3F6.02c|erg26|II|3 beta-hydroxysteroid dehydrogenase/delta 5-->4-isomerase Erg26 (predicted)	1	1	1	1	1	1	1	1	1	1	2.9	2.9	2.9	38.317	340	340	0	3.9485	By MS/MS	By MS/MS	2.9	2.9	9053000	4102700	4950400	0	4701300	1	1	2				685	4667	TRUE	4819	10138;10139	9618;9619	9619
SPBC3H7.03c|kgd1|II|2-oxoglutarate	SPBC3H7.03c|kgd1|II|2-oxoglutarate	8	8	8	>SPBC3H7.03c|kgd1|II|2-oxoglutarate dehydrogenase (lipoamide) (e1 component of oxoglutarate dehydrogenase complex) (predicted)	1	8	8	8	6	8	6	8	6	8	10.3	10.3	10.3	114.16	1009	1009	0	22.594	By MS/MS	By MS/MS	7.4	10.3	78482000	43627000	34855000	38724000	38004000	4	8	12				686	335;392;2450;2938;3084;4150;4386;4424	True;True;True;True;True;True;True;True	346;404;2512;3016;3164;4283;4524;4565	758;759;855;5139;5140;6117;6118;6402;6403;9044;9501;9502;9599;9600	716;717;806;4878;5818;5819;6089;6090;8596;9029;9030;9115	716;806;4878;5818;6090;8596;9029;9115
SPBC3H7.06c|pof9|II|F-box	SPBC3H7.06c|pof9|II|F-box	1	1	1	>SPBC3H7.06c|pof9|II|F-box protein Pof9	1	1	1	1	1	0	1	0	1	0	3.4	3.4	3.4	52.419	467	467	0.0044643	1.3216	By MS/MS	By matching	3.4	0	6910100	6910100	0	6910100	0	0	0	0				687	4988	TRUE	5151	10796	10257	10257
SPBC3H7.15|hhp1|II|serine/threonine	SPBC3H7.15|hhp1|II|serine/threonine	7	6	6	>SPBC3H7.15|hhp1|II|serine/threonine protein kinase Hhp1	1	7	6	6	7	7	6	6	6	6	20	16.7	16.7	42.45	365	365	0	12.592	By MS/MS	By MS/MS	20	20	111100000	63871000	47227000	62270000	46452000	7	6	13				688	239;645;1871;2168;4433;4619;5204	True;True;True;True;True;False;True	248;665;1914;2217;4575;4770;5372	585;586;1383;1384;3977;3978;4553;4554;9615;9616;9617;9618;10041;10042;11205;11206	546;547;1303;1304;3770;4317;4318;9127;9128;9129;9130;9530;9531;10652;10653	547;1304;3770;4318;9128;9531;10652
SPBC4.03c|SPBC4.03c|II|COPII-coated	SPBC4.03c|SPBC4.03c|II|COPII-coated	2	2	2	>SPBC4.03c|SPBC4.03c|II|COPII-coated vesicle component Sfb3 (predicted)	1	2	2	2	2	1	2	1	2	1	2.4	2.4	2.4	98.068	891	891	0.0011468	1.5085	By MS/MS	By MS/MS	2.4	0.8	30802000	16273000	14530000	0	13798000	1	1	2				689	3387;3438	True;True	3498;3549	7364;7470;7471	7004;7106	7004;7106
SPBC4.06|SPBC4.06|II|acid	SPBC4.06|SPBC4.06|II|acid	1	1	1	>SPBC4.06|SPBC4.06|II|acid phosphatase (predicted)	1	1	1	1	1	1	1	1	1	1	2.4	2.4	2.4	51.975	462	462	0	1.5778	By matching	By MS/MS	2.4	2.4	5959600	1863900	4095700	0	3889600	0	0	0				690	3169	TRUE	3249	6584;6585	6261	6261
SPBC4.07c|rpt2|II|19S	SPBC4.07c|rpt2|II|19S	4	4	4	>SPBC4.07c|rpt2|II|19S proteasome regulatory subunit Rpt2	1	4	4	4	2	3	2	3	2	3	11.4	11.4	11.4	50.06	448	448	0	7.7242	By MS/MS	By MS/MS	4.7	8.7	21474000	6774400	14700000	6774400	0	3	3	6				691	232;2079;2258;2990	True;True;True;True	241;2124;2313;3069	574;4363;4757;6219;6220	534;535;4140;4515;5914;5915	535;4140;4515;5914
SPBC405.01|ade1|II|phosphoribosylamine-glycine	SPBC405.01|ade1|II|phosphoribosylamine-glycine	4	4	4	>SPBC405.01|ade1|II|phosphoribosylamine-glycine ligase/phosphoribosylformylglycinamidine cyclo-ligase	1	4	4	4	3	4	3	4	3	4	7	7	7	85.23	788	788	0	17.283	By MS/MS	By MS/MS	5.3	7	20634000	9375600	11259000	9211000	10857000	2	3	5				692	2072;2576;3238;3845	True;True;True;True	2117;2646;3329;3973	4351;5413;5414;6814;6815;8439;8440	4129;5143;5144;6474;8029;8030	4129;5144;6474;8030
SPBC418.01c|his4|II|imidazoleglycerol-phosphate	SPBC418.01c|his4|II|imidazoleglycerol-phosphate	3	3	3	>SPBC418.01c|his4|II|imidazoleglycerol-phosphate synthase (predicted)	1	3	3	3	1	3	1	3	1	3	6.8	6.8	6.8	59.399	541	541	0	7.4684	By MS/MS	By MS/MS	3.1	6.8	14597000	2260500	12336000	0	11716000	1	2	3				693	120;631;1590	True;True;True	127;651;1627	370;371;1359;3399	342;343;1279;3200	342;1279;3200
SPBC428.02c|eca39|II|branched	SPBC428.02c|eca39|II|branched	4	4	4	>SPBC428.02c|eca39|II|branched chain amino acid aminotransferase Eca39	1	4	4	4	2	4	2	4	2	4	12.9	12.9	12.9	47.855	427	427	0	5.1495	By MS/MS	By MS/MS	6.8	12.9	30352000	11214000	19138000	12002000	17387000	2	3	5				694	1219;2275;2831;5151	True;True;True;True	1252;2330;2906;5318	2521;2522;4785;4786;5905;11113	2386;4540;4541;5621;10563	2386;4541;5621;10563
SPBC428.05c|arg12|II|argininosuccinate	SPBC428.05c|arg12|II|argininosuccinate	1	1	1	>SPBC428.05c|arg12|II|argininosuccinate synthase Arg12	1	1	1	1	1	1	1	1	1	1	1.7	1.7	1.7	46.084	410	410	0	1.9514	By MS/MS	By MS/MS	1.7	1.7	27861000	11271000	16590000	0	15755000	1	1	2				695	2992	TRUE	3071	6222;6223	5917;5918	5917
SPBC428.11|met17|II|homocysteine	SPBC428.11|met17|II|homocysteine	9	9	9	>SPBC428.11|met17|II|homocysteine synthase Met17	1	9	9	9	8	9	8	9	8	9	35	35	35	46.408	429	429	0	42.329	By MS/MS	By MS/MS	30.8	35	179450000	72121000	107330000	74243000	99810000	7	10	17				696	139;476;489;1420;1905;2662;4690;4950;5148	True;True;True;True;True;True;True;True;True	147;491;504;1456;1948;2734;4843;5113;5315	402;403;1033;1034;1056;1057;3013;3014;4037;4038;5575;5576;10222;10223;10728;10729;11109	370;371;372;969;970;989;2838;2839;3831;3832;5303;5304;9699;10189;10190;10191;10559	371;969;989;2838;3832;5303;9699;10190;10559
SPBC428.14|SPBC428.14|II|1-acylglycerol-3-phosphate	SPBC428.14|SPBC428.14|II|1-acylglycerol-3-phosphate	2	2	2	>SPBC428.14|SPBC428.14|II|1-acylglycerol-3-phosphate acyltransferase (predicted)	1	2	2	2	2	0	2	0	2	0	4.9	4.9	4.9	41.354	350	350	0	2.0587	By MS/MS	By matching	4.9	0	1347400	1347400	0	1347400	0	2	0	2				697	2657;3426	True;True	2729;3537	5567;7443	5295;7078	5295;7078
SPBC428.16c|rhb1|II|Rheb	SPBC428.16c|rhb1|II|Rheb	1	1	1	>SPBC428.16c|rhb1|II|Rheb GTPase Rhb1	1	1	1	1	1	0	1	0	1	0	5.9	5.9	5.9	20.515	185	185	0	2.0647	By MS/MS	By matching	5.9	0	2052200	2052200	0	2052200	0	1	0	1				698	107	TRUE	114	349	323	323
SPBC428.20c|alp6|II|gamma	SPBC428.20c|alp6|II|gamma	4	4	4	>SPBC428.20c|alp6|II|gamma tubulin complex Spc98/GCP3 subunit Alp6	1	4	4	4	3	3	3	3	3	3	6.7	6.7	6.7	95.996	832	832	0	10.797	By MS/MS	By MS/MS	5.4	4.6	9565100	5097200	4467800	4848600	4491700	5	4	9				699	999;2013;2959;4179	True;True;True;True	1030;2058;3038;4313	2086;2087;2088;2089;4246;4247;6165;9104	1971;1972;1973;1974;1975;4026;4027;5864;8653	1974;4026;5864;8653
SPBC4B4.08|ght2|II|hexose	SPBC4B4.08|ght2|II|hexose	3	3	3	>SPBC4B4.08|ght2|II|hexose transmembrane transporter Ght2	1	3	3	3	2	3	2	3	2	3	9.8	9.8	9.8	58.845	531	531	0	14.357	By MS/MS	By MS/MS	7.3	9.8	79652000	36081000	43571000	39943000	37517000	3	3	6				700	4906;5190;5330	True;True;True	5068;5358;5501	10652;10653;11179;11180;11569	10112;10113;10114;10627;10628;11015	10112;10628;11015
SPBC4B4.09|usp105|II|U1	SPBC4B4.09|usp105|II|U1	4	4	4	>SPBC4B4.09|usp105|II|U1 snRNP-associated protein Usp105	1	4	4	4	3	2	3	2	3	2	6.4	6.4	6.4	71.246	612	612	0	3.2259	By MS/MS	By MS/MS	5.1	2.8	5841700	5841700	0	5841700	0	2	2	4				701	780;956;2759;4992	True;True;True;True	807;985;2833;5155	1660;1661;2007;5770;10804	1568;1569;1893;5482;10265	1568;1893;5482;10265
SPBC4C3.05c|nuc1|II|DNA-directed	SPBC4C3.05c|nuc1|II|DNA-directed	1	1	1	>SPBC4C3.05c|nuc1|II|DNA-directed RNA polymerase I complex large subunit Nuc1	1	1	1	1	1	1	1	1	1	1	0.5	0.5	0.5	189.24	1689	1689	0.0043764	1.1733	By matching	By MS/MS	0.5	0.5	1463100	719850	743210	0	705810	0	1	1				702	133	TRUE	141	392;393	362	362
SPBC4C3.07|eif6|II|translation	SPBC4C3.07|eif6|II|translation	5	5	5	>SPBC4C3.07|eif6|II|translation initiation factor eIF3f	1	5	5	5	5	5	5	5	5	5	21.5	21.5	21.5	33.251	302	302	0	23.249	By MS/MS	By MS/MS	21.5	21.5	137500000	69897000	67598000	66004000	68090000	5	5	10				703	1899;2548;4226;4249;4826	True;True;True;True;True	1942;2617;4361;4384;4985	4027;4028;5360;5361;9189;9190;9228;9229;10494;10495	3820;5092;5093;8731;8732;8766;8767;8768;9955;9956	3820;5092;8731;8768;9956
SPBC4C3.09|SPBC4C3.09|II|acetylglucosaminyltransferase	SPBC4C3.09|SPBC4C3.09|II|acetylglucosaminyltransferase	1	1	1	>SPBC4C3.09|SPBC4C3.09|II|acetylglucosaminyltransferase (predicted)	1	1	1	1	1	1	1	1	1	1	3.7	3.7	3.7	44.095	376	376	0	1.5746	By MS/MS	By MS/MS	3.7	3.7	2043300	1277900	765460	0	726940	1	1	2				704	1799	TRUE	1842	3825;3826;3827	3626;3627	3627
SPBC4C3.10c|pre3|II|20S	SPBC4C3.10c|pre3|II|20S	1	1	1	>SPBC4C3.10c|pre3|II|20S proteasome complex subunit beta 1 Pre3 (predicted)	1	1	1	1	0	1	0	1	0	1	7.1	7.1	7.1	24.564	226	226	0	6.8549	By matching	By MS/MS	0	7.1	3760300	0	3760300	0	3571100	0	1	1				705	2406	TRUE	2464	5042	4787	4787
SPBC4F6.05c|SPBC4F6.05c|II|lectin	SPBC4F6.05c|SPBC4F6.05c|II|lectin	1	1	1	>SPBC4F6.05c|SPBC4F6.05c|II|lectin family glycoprotein receptor (predicted)	1	1	1	1	1	0	1	0	1	0	2.3	2.3	2.3	42.768	384	384	0	2.2686	By MS/MS	By matching	2.3	0	1248800	1248800	0	1248800	0	0	0	0				706	2672	TRUE	2745	5596	5323	5323
SPBC4F6.18c|arf1|II|ADP-ribosylation	SPBC4F6.18c|arf1|II|ADP-ribosylation	6	6	6	>SPBC4F6.18c|arf1|II|ADP-ribosylation factor, Arf family Arf1	1	6	6	6	4	6	4	6	4	6	37.8	37.8	37.8	20.618	180	180	0	17.977	By MS/MS	By MS/MS	29.4	37.8	52431000	24130000	28301000	24378000	26630000	2	7	9				707	555;2155;2259;3261;3395;3640	True;True;True;True;True;True	571;2204;2314;3359;3506;3759	1195;4531;4532;4758;4759;6875;6876;7378;7379;7916	1123;4297;4516;6526;6527;7015;7016;7017;7539	1123;4297;4516;6526;7017;7539	158	134
SPBC530.05|prt1|II|transcription	SPBC530.05|prt1|II|transcription	1	1	1	>SPBC530.05|prt1|II|transcription factor (predicted)	1	1	1	1	1	1	1	1	1	1	2.6	2.6	2.6	85.198	762	762	0.0065359	1.1423	By matching	By MS/MS	2.6	2.6	10112000	3320400	6791200	0	6449500	0	1	1				708	4288	TRUE	4425	9306;9307	8839	8839
SPBC530.07c|SPBC530.07c|II|TENA/THI	SPBC530.07c|SPBC530.07c|II|TENA/THI	7	7	7	>SPBC530.07c|SPBC530.07c|II|TENA/THI family protein	1	7	7	7	6	7	6	7	6	7	41.3	41.3	41.3	27.839	242	242	0	17.936	By MS/MS	By MS/MS	37.6	41.3	176410000	75671000	100730000	85018000	86318000	6	6	12				709	828;1206;2381;2706;4042;4160;5185	True;True;True;True;True;True;True	857;1239;2437;2780;4175;4293;5353	1746;1747;2495;2496;4987;4988;5662;5663;8832;8833;9063;9064;11170	1652;1653;2360;4737;4738;5381;8397;8398;8613;8614;8615;10618	1653;2360;4737;5381;8397;8614;10618
SPBC530.10c|anc1|II|mitochondrial	SPBC530.10c|anc1|II|mitochondrial	5	5	5	>SPBC530.10c|anc1|II|mitochondrial adenine nucleotide carrier Anc1	1	5	5	5	5	4	5	4	5	4	14	14	14	35.02	322	322	0	17.363	By MS/MS	By MS/MS	14	11.5	136130000	62707000	73422000	68788000	63647000	5	3	8				710	1491;1628;3663;5252;5253	True;True;True;True;True	1527;1667;3782;5421;5422	3155;3156;3479;7954;7955;7956;11408;11409;11410;11411	2971;3280;7575;7576;10866;10867;10868;10869	2971;3280;7576;10867;10869
SPBC530.14c|dsk1|II|SR	SPBC530.14c|dsk1|II|SR	2	2	2	>SPBC530.14c|dsk1|II|SR protein-specific kinase Dsk1	1	2	2	2	2	1	2	1	2	1	4.6	4.6	4.6	61.055	544	544	0	2.6154	By MS/MS	By MS/MS	4.6	1.5	6646900	3093800	3553100	0	2963400	3	1	4				711	856;1087	True;True	885;1119	1798;2265;2266;2267;2268	1702;2134;2135;2136	1702;2134
SPBC543.02c|SPBC543.02c|II|DNAJ/TPR	SPBC543.02c|SPBC543.02c|II|DNAJ/TPR	5	5	5	>SPBC543.02c|SPBC543.02c|II|DNAJ/TPR domain protein DNAJC7 family	1	5	5	5	4	3	4	3	4	3	14.5	14.5	14.5	53.304	476	476	0	12.321	By MS/MS	By MS/MS	11.3	7.1	53987000	25229000	28758000	23610000	28930000	4	3	7				712	387;1097;2798;3549;3624	True;True;True;True;True	399;1129;2872;3665;3743	847;2286;5847;7694;7695;7884;7885	799;2155;5559;7323;7324;7325;7508	799;2155;5559;7325;7508	159	159
SPBC56F2.02|rpl1901|II|60S;SPCC1682.14|rpl1902|III|60S	SPBC56F2.02|rpl1901|II|60S;SPCC1682.14|rpl1902|III|60S	3;2	3;2	3;2	>SPBC56F2.02|rpl1901|II|60S ribosomal protein L19;>SPCC1682.14|rpl1902|III|60S ribosomal protein L19	2	3	3	3	3	2	3	2	3	2	16.1	16.1	16.1	22.723	193	193;193	0	3.0148	By MS/MS	By MS/MS	16.1	8.8	21801000	15410000	6391600	15410000	0	1	2	3				713	285;1989;3274	True;True;True	294;2034;3377	673;674;4203;6923;6924	635;636;3988;6580;6581	636;3988;6580
SPBC56F2.09c|arg5|II|arginine	SPBC56F2.09c|arg5|II|arginine	3	3	3	>SPBC56F2.09c|arg5|II|arginine specific carbamoyl-phosphate synthase subunit Arg5 (predicted)	1	3	3	3	2	3	2	3	2	3	10.8	10.8	10.8	45.661	415	415	0	5.1581	By MS/MS	By MS/MS	8	10.8	59480000	22756000	36724000	26162000	31471000	3	2	5				714	905;3356;3748	True;True;True	934;3467;3872	1899;7292;7293;8157;8158;8159;8160	1799;6935;6936;7775;7776	1799;6936;7775
SPBC56F2.12|ilv5|II|acetohydroxyacid	SPBC56F2.12|ilv5|II|acetohydroxyacid	27	27	27	>SPBC56F2.12|ilv5|II|acetohydroxyacid reductoisomerase (predicted)	1	27	27	27	27	26	27	26	27	26	62.6	62.6	62.6	45.188	404	404	0	323.31	By MS/MS	By MS/MS	62.6	62.6	3322600000	1608500000	1714100000	1630400000	1598000000	34	30	64				715	742;743;778;1007;1008;1104;1272;1444;1532;1563;1666;1951;2086;2414;3133;3323;3625;3827;3855;4071;4479;4480;4518;4895;4896;4922;5264	True;True;True;True;True;True;True;True;True;True;True;True;True;True;True;True;True;True;True;True;True;True;True;True;True;True;True	766;767;805;1038;1039;1136;1307;1480;1568;1600;1706;1707;1995;2132;2472;3213;3432;3744;3954;3983;4204;4623;4624;4664;5057;5058;5085;5433	1582;1583;1584;1585;1586;1587;1656;1657;2108;2109;2110;2111;2112;2113;2114;2115;2300;2301;2652;2653;3053;3054;3241;3242;3343;3344;3345;3346;3550;3551;3552;3553;3554;4127;4128;4378;4379;5055;5056;6502;6503;6504;6505;7214;7215;7216;7217;7886;7887;8408;8409;8454;8898;8899;9735;9736;9737;9738;9739;9740;9828;9829;10631;10632;10633;10634;10635;10683;10684;11430;11431	1495;1496;1497;1498;1499;1565;1566;1995;1996;1997;1998;1999;2000;2001;2167;2168;2508;2877;2878;3050;3051;3143;3144;3145;3146;3348;3349;3350;3351;3352;3353;3914;3915;4154;4800;6182;6183;6184;6865;6866;6867;6868;6869;7509;7510;8000;8001;8045;8465;8466;9243;9244;9245;9246;9247;9248;9332;10091;10092;10093;10094;10095;10144;10145;10886	1496;1498;1565;1996;2000;2168;2508;2877;3051;3143;3352;3915;4154;4800;6184;6868;7510;8000;8045;8465;9243;9248;9332;10091;10095;10145;10886	160	149
SPBC577.06c|stt4|II|1-phosphatidylinositol	SPBC577.06c|stt4|II|1-phosphatidylinositol	3	3	3	>SPBC577.06c|stt4|II|1-phosphatidylinositol 4-kinase Stt4 (predicted)	1	3	3	3	1	2	1	2	1	2	2.2	2.2	2.2	213.96	1877	1877	0	6.7354	By MS/MS	By MS/MS	0.9	1.3	7531700	1677400	5854300	1677400	0	1	2	3				716	180;1166;1289	True;True;True	188;1198;1324	477;2415;2685	442;2281;2538	442;2281;2538
SPBC582.03|cdc13|II|G2/M	SPBC582.03|cdc13|II|G2/M	7	7	7	>SPBC582.03|cdc13|II|G2/M B-type cyclin Cdc13	1	7	7	7	6	7	6	7	6	7	20.1	20.1	20.1	55.609	482	482	0	16.481	By MS/MS	By MS/MS	18.3	20.1	49235000	28840000	20395000	26901000	21308000	8	6	14				717	49;1562;1762;3617;3679;4003;5342	True;True;True;True;True;True;True	50;1599;1805;3736;3800;4136;5513	98;99;3341;3342;3755;3756;7871;7991;7992;7993;7994;7995;7996;7997;8746;8747;11591;11592	98;3141;3142;3553;3554;3555;7496;7610;7611;7612;7613;7614;8318;11036;11037	98;3141;3554;7496;7610;8318;11036
SPBC582.06c|mcp6|II|horsetail	SPBC582.06c|mcp6|II|horsetail	3	3	3	>SPBC582.06c|mcp6|II|horsetail movement protein Hrs1/Mcp6	1	3	3	3	2	3	2	3	2	3	8.6	8.6	8.6	38.103	327	327	0	9.1445	By MS/MS	By MS/MS	5.5	8.6	31909000	16964000	14945000	17656000	13501000	2	2	4				718	927;2432;4504	True;True;True	956;2492;4649	1944;1945;5096;9791;9792	1843;1844;4836;9298;9299	1844;4836;9298
SPBC646.04|pla1|II|poly(A)	SPBC646.04|pla1|II|poly(A)	1	1	1	>SPBC646.04|pla1|II|poly(A) polymerase Pla1	1	1	1	1	1	0	1	0	1	0	2.7	2.7	2.7	64.108	566	566	0	4.536	By MS/MS	By matching	2.7	0	2907100	2907100	0	2907100	0	1	0	1				719	2631	TRUE	2701	5501	5229	5229
SPBC646.05c|erg9|II|farnesyldiphosphate:farnesyldiphosphatefarnesyltransferase	SPBC646.05c|erg9|II|farnesyldiphosphate:farnesyldiphosphatefarnesyltransferase	3	3	3	>SPBC646.05c|erg9|II|farnesyldiphosphate:farnesyldiphosphatefarnesyltransferase (squalene synthase) Erg9	1	3	3	3	3	2	3	2	3	2	6.7	6.7	6.7	53.321	460	460	0	5.0324	By MS/MS	By MS/MS	6.7	4.6	23324000	16293000	7030900	10307000	12663000	4	1	5				720	1132;1645;3944	True;True;True	1164;1684;4076	2353;3511;3512;8631;8632	2220;2221;3311;8206;8207	2221;3311;8207
SPBC646.07c|tsc13|II|enoyl	SPBC646.07c|tsc13|II|enoyl	4	4	4	>SPBC646.07c|tsc13|II|enoyl reductase (predicted)	1	4	4	4	3	3	3	3	3	3	14.6	14.6	14.6	34.64	295	295	0	6.846	By MS/MS	By MS/MS	11.2	14.6	23656000	9652800	14003000	11116000	11836000	3	3	6				721	1124;4067;4068;5274	True;True;True;True	1156;4200;4201;5444	2335;2336;8892;8893;11453;11454	2201;2202;8458;8459;10908;10909	2202;8458;8459;10909
SPBC646.08c|SPBC646.08c|II|oxysterol	SPBC646.08c|SPBC646.08c|II|oxysterol	2	2	2	>SPBC646.08c|SPBC646.08c|II|oxysterol binding protein (predicted)	1	2	2	2	1	2	1	2	1	2	4.5	4.5	4.5	58.691	516	516	0	2.2117	By MS/MS	By MS/MS	1.7	4.5	9727200	2122300	7604900	0	7222300	1	1	2				722	4447;4879	True;True	4589;5041	9664;9665;10604	9172;10062	9172;10062
SPBC646.09c|int6|II|eIF3e	SPBC646.09c|int6|II|eIF3e	5	5	5	>SPBC646.09c|int6|II|eIF3e subunit Int6	1	5	5	5	4	5	4	5	4	5	16.2	16.2	16.2	57.114	501	501	0	14.121	By MS/MS	By MS/MS	14.6	16.2	46728000	21652000	25076000	23510000	21956000	4	4	8				723	241;1156;3955;4259;4372	True;True;True;True;True	250;1188;4087;4395;4510	589;590;2395;2396;8653;8654;9255;9472;9473	551;552;2262;2263;2264;8227;8228;8791;9003	551;2262;8228;8791;9003
SPBC646.10c|nop56|II|U3	SPBC646.10c|nop56|II|U3	1	1	1	>SPBC646.10c|nop56|II|U3 snoRNP protein Nop56 (predicted)	1	1	1	1	1	1	1	1	1	1	1.8	1.8	1.8	55.388	497	497	0.0086674	1.1086	By MS/MS	By MS/MS	1.8	1.8	4813300	1497300	3316000	0	3149100	1	1	2				724	3343	TRUE	3454	7269;7270	6916;6917	6916
SPBC646.11|cct6|II|chaperonin-containing	SPBC646.11|cct6|II|chaperonin-containing	6	6	6	>SPBC646.11|cct6|II|chaperonin-containing T-complex zeta subunit Cct6	1	6	6	6	5	6	5	6	5	6	18.9	18.9	18.9	58.548	535	535	0	13.825	By MS/MS	By MS/MS	16.1	18.9	110410000	53484000	56925000	56517000	51027000	4	7	11				725	1543;1598;3892;4371;4470;5080	True;True;True;True;True;True	1580;1636;4020;4509;4614;5245	3309;3310;3418;3419;8522;8523;9471;9716;9717;10967;10968;10969	3112;3113;3218;3219;8106;9002;9224;9225;10418;10419;10420	3112;3218;8106;9002;9224;10418
SPBC646.12c|gap1|II|GTPase	SPBC646.12c|gap1|II|GTPase	1	1	1	>SPBC646.12c|gap1|II|GTPase activating protein Gap1	1	1	1	1	0	1	0	1	0	1	1	1	1	87.539	766	766	0	2.6149	By matching	By MS/MS	0	1	2378900	0	2378900	0	2259200	0	1	1				726	1945	TRUE	1989	4114	3901	3901
SPBC646.13|sds23|II|PP2A-type	SPBC646.13|sds23|II|PP2A-type	6	6	6	>SPBC646.13|sds23|II|PP2A-type phosphatase inhibitor Sds23/Moc1	1	6	6	6	5	6	5	6	5	6	19.6	19.6	19.6	44.288	408	408	0	19.079	By MS/MS	By MS/MS	16.9	19.6	56603000	26493000	30111000	31355000	23734000	3	6	9				727	704;1308;2518;2835;3402;3760	True;True;True;True;True;True	726;1343;2585;2910;3513;3884	1496;1497;2724;2725;5287;5288;5912;7392;7393;8183;8184	1415;1416;2573;5019;5020;5628;7029;7030;7802	1415;2573;5019;5628;7030;7802
SPBC646.16|scl1|II|20S	SPBC646.16|scl1|II|20S	1	1	1	>SPBC646.16|scl1|II|20S proteasome complex subunit alpha 1 (predicted)	1	1	1	1	1	1	1	1	1	1	11.1	11.1	11.1	26.539	244	244	0.0095643	0.95572	By matching	By MS/MS	11.1	11.1	10129000	6701900	3426700	0	3254300	0	1	1				728	600	TRUE	619	1293;1294	1218	1218
SPBC649.02|rps1902|II|40S	SPBC649.02|rps1902|II|40S	3	1	1	>SPBC649.02|rps1902|II|40S ribosomal protein S19 (predicted)	1	3	1	1	3	3	1	1	1	1	28.7	11.9	11.9	16.062	143	143	0	2.1716	By MS/MS	By MS/MS	28.7	28.7	8072700	8072700	0	8072700	0	1	1	2				729	772;951;3290	True;False;False	798;980;3396	1641;1642;1995;1996;6961;6962	1552;1553;1883;6622;6623	1552;1883;6623
SPBC651.06|mug166|II|Schizosaccharomyces	SPBC651.06|mug166|II|Schizosaccharomyces	1	1	1	>SPBC651.06|mug166|II|Schizosaccharomyces specific protein Mug166	1	1	1	1	1	0	1	0	1	0	4.3	4.3	4.3	25.915	234	234	0	3.8858	By MS/MS	By matching	4.3	0	4129100	4129100	0	4129100	0	1	0	1				730	2999	TRUE	3078	6233	5925	5925
SPBC660.06|SPBC660.06|II|WW	SPBC660.06|SPBC660.06|II|WW	1	1	1	>SPBC660.06|SPBC660.06|II|WW domain containing conserved fungal protein	1	1	1	1	0	1	0	1	0	1	7.3	7.3	7.3	26.252	273	273	0	6.7922	By matching	By MS/MS	0	7.3	2431400	0	2431400	0	2309000	0	1	1				731	1588	TRUE	1625	3396	3198	3198
SPBC660.13c|ssb1|II|DNA	SPBC660.13c|ssb1|II|DNA	1	1	1	>SPBC660.13c|ssb1|II|DNA replication factor A subunit Ssb1	1	1	1	1	0	1	0	1	0	1	3.6	3.6	3.6	68.196	609	609	0	1.5828	By matching	By MS/MS	0	3.6	1502000	0	1502000	0	1426400	0	1	1				732	564	TRUE	581	1214	1142	1142
SPBC660.16|SPBC660.16|II|phosphogluconate	SPBC660.16|SPBC660.16|II|phosphogluconate	19	19	19	>SPBC660.16|SPBC660.16|II|phosphogluconate dehydrogenase, decarboxylating	1	19	19	19	18	17	18	17	18	17	55.5	55.5	55.5	53.679	492	492	0	77.57	By MS/MS	By MS/MS	53.5	45.9	450770000	202520000	248250000	188710000	228890000	16	17	33				733	149;803;864;1086;1559;1589;2117;2127;2412;2616;2942;3714;3896;4048;4699;5063;5172;5269;5309	True;True;True;True;True;True;True;True;True;True;True;True;True;True;True;True;True;True;True	157;830;893;1118;1596;1626;2164;2175;2470;2686;3020;3021;3836;4024;4181;4852;5228;5339;5438;5439;5479	420;421;1701;1702;1811;1812;2264;3335;3336;3397;3398;4447;4448;4477;4478;5051;5052;5476;6126;6127;6128;6129;6130;8074;8075;8530;8531;8844;8845;10238;10239;10934;10935;11147;11440;11441;11442;11526;11527	389;390;1611;1612;1714;1715;2133;3135;3136;3199;4221;4222;4248;4249;4795;4796;5205;5827;5828;5829;7685;7686;8113;8114;8406;8407;9712;9713;10384;10599;10895;10896;10980	390;1611;1715;2133;3135;3199;4221;4248;4796;5205;5829;7686;8114;8407;9712;10384;10599;10895;10980	161;162	145;363
SPBC685.06|rps001|II|40S	SPBC685.06|rps001|II|40S	4	2	2	>SPBC685.06|rps001|II|40S ribosomal protein S0A (p40)	1	4	2	2	3	4	1	2	1	2	17.1	8.6	8.6	31.759	292	292	0	5.2331	By MS/MS	By MS/MS	11.3	17.1	21195000	7975100	13220000	0	12555000	1	2	3				734	1142;1388;2790;4817	False;False;True;True	1174;1424;2864;4976	2367;2368;2957;2958;5829;5830;10477	2234;2784;2785;5543;5544;9936	2234;2784;5544;9936
SPCC74.05|rpl2702|III|60S;SPBC685.07c|rpl2701|II|60S	SPCC74.05|rpl2702|III|60S;SPBC685.07c|rpl2701|II|60S	3;3	3;3	3;3	>SPCC74.05|rpl2702|III|60S ribosomal protein L27 (predicted);>SPBC685.07c|rpl2701|II|60S ribosomal protein L27	2	3	3	3	3	3	3	3	3	3	24.3	24.3	24.3	15.305	136	136;136	0	9.6435	By MS/MS	By MS/MS	24.3	24.3	54566000	25417000	29149000	26362000	26737000	3	3	6				735	3899;4002;5195	True;True;True	4027;4135;5363	8538;8539;8744;8745;11189;11190	8120;8121;8316;8317;10638;10639	8121;8317;10639
SPBC691.03c|apl3|II|AP-2	SPBC691.03c|apl3|II|AP-2	6	6	6	>SPBC691.03c|apl3|II|AP-2 adaptor complex subunit Alp3 (predicted)	1	6	6	6	4	6	4	6	4	6	9.3	9.3	9.3	100.08	878	878	0	13.501	By MS/MS	By MS/MS	7.1	9.3	32095000	14763000	17332000	17211000	14012000	4	6	10				736	975;1228;2524;2787;4766;4892	True;True;True;True;True;True	1005;1262;2591;2861;4923;5054	2044;2045;2549;5301;5302;5825;5826;10372;10373;10624	1931;1932;2411;5033;5034;5035;5539;5540;9839;10083	1931;2411;5033;5540;9839;10083
SPBC6B1.07|prp1|II|U4/U6	SPBC6B1.07|prp1|II|U4/U6	1	1	1	>SPBC6B1.07|prp1|II|U4/U6 x U5 tri-snRNP complex subunit Prp1	1	1	1	1	1	1	1	1	1	1	1.1	1.1	1.1	103	906	906	0	2.0318	By MS/MS	By MS/MS	1.1	1.1	1215300	0	1215300	0	1154200	1	1	2				737	314	TRUE	325	720;721	681;682	682
SPBC713.02c|ubp15|II|ubiquitin	SPBC713.02c|ubp15|II|ubiquitin	16	16	16	>SPBC713.02c|ubp15|II|ubiquitin C-terminal hydrolase Ubp15	1	16	16	16	15	14	15	14	15	14	18.8	18.8	18.8	130.83	1129	1129	0	32.264	By MS/MS	By MS/MS	17.5	15.9	147420000	72734000	74686000	68682000	74981000	17	13	30				738	1107;1555;1683;2218;2589;2952;3204;3520;3538;3754;3881;4367;4429;4777;5086;5427	True;True;True;True;True;True;True;True;True;True;True;True;True;True;True;True	1139;1592;1725;2270;2659;3031;3284;3635;3654;3878;4009;4505;4571;4934;5252;5600	2306;3327;3328;3593;3594;4660;5435;5436;6151;6152;6653;6654;6655;7638;7639;7673;7674;8170;8171;8501;8502;9466;9608;9609;10393;10394;10982;10983;10984;11773;11774	2173;3127;3128;3391;3392;3393;4417;5164;5165;5849;5850;6325;6326;7271;7272;7304;7305;7787;7788;7789;8089;8090;8996;9123;9855;9856;10433;10434;11205;11206	2173;3127;3393;4417;5165;5850;6325;7272;7304;7787;8089;8996;9123;9856;10434;11206
SPBC713.04c|pwp2|II|U3	SPBC713.04c|pwp2|II|U3	1	1	1	>SPBC713.04c|pwp2|II|U3 snoRNP-associated protein Utp1 (predicted)	1	1	1	1	0	1	0	1	0	1	0.8	0.8	0.8	95.44	854	854	0	2.1444	By matching	By MS/MS	0	0.8	1576100	0	1576100	0	1496800	0	1	1				739	2364	TRUE	2420	4956	4702	4702
SPBC713.12|erg1|II|squalene	SPBC713.12|erg1|II|squalene	1	1	1	>SPBC713.12|erg1|II|squalene monooxygenase Erg1 (predicted)	1	1	1	1	0	1	0	1	0	1	1.8	1.8	1.8	50.338	457	457	0.0044004	1.2042	By matching	By MS/MS	0	1.8	2590500	0	2590500	0	2460200	0	1	1				740	2147	TRUE	2196	4514	4284	4284
SPBC725.09c|hob3|II|BAR	SPBC725.09c|hob3|II|BAR	3	3	3	>SPBC725.09c|hob3|II|BAR adaptor protein Hob3	1	3	3	3	2	3	2	3	2	3	15.2	15.2	15.2	30.094	264	264	0	5.1904	By MS/MS	By MS/MS	10.6	15.2	97145000	14970000	82175000	45939000	47072000	2	2	4				741	1947;3286;4980	True;True;True	1991;3390;5143	4117;4118;6950;10778;10779	3904;3905;6611;10240;10241	3905;6611;10240
SPBC725.16|res1|II|MBF	SPBC725.16|res1|II|MBF	9	9	9	>SPBC725.16|res1|II|MBF transcription factor complex subunit Res1	1	9	9	9	7	9	7	9	7	9	18.8	18.8	18.8	72.441	637	637	0	20.566	By MS/MS	By MS/MS	14.6	18.8	103010000	36902000	66112000	37551000	62136000	4	10	14				742	515;723;1779;2006;2456;3103;3142;3281;5436	True;True;True;True;True;True;True;True;True	530;747;1822;2051;2518;3183;3222;3385;5609	1107;1540;1541;3789;4233;4234;5153;5154;6440;6441;6519;6520;6940;6941;11794;11795	1035;1455;3588;4015;4891;6121;6122;6123;6198;6199;6597;6598;11225;11226	1035;1455;3588;4015;4891;6122;6199;6598;11226	163	159
SPBC776.02c|dis2|II|serine/threonine	SPBC776.02c|dis2|II|serine/threonine	1	1	1	>SPBC776.02c|dis2|II|serine/threonine protein phosphatase PP1, Dis2	1	1	1	1	1	1	1	1	1	1	4	4	4	37.636	327	327	0	2.1662	By MS/MS	By MS/MS	4	4	17284000	11296000	5987600	0	5686400	1	1	2				743	1722	TRUE	1764	3663;3664	3463;3464	3464
SPBC776.03|SPBC776.03|II|homoserine	SPBC776.03|SPBC776.03|II|homoserine	1	1	1	>SPBC776.03|SPBC776.03|II|homoserine dehydrogenase (predicted)	1	1	1	1	1	1	1	1	1	1	4	4	4	40.037	376	376	0	4.4327	By MS/MS	By MS/MS	4	4	9295100	3857200	5437900	0	5164300	1	1	2				744	1935	TRUE	1979	4095;4096	3884;3885	3885
SPBC776.04|sec2302|II|COPII	SPBC776.04|sec2302|II|COPII	4	4	4	>SPBC776.04|sec2302|II|COPII cargo receptor subunit Sec23b (predicted)	1	4	4	4	3	4	3	4	3	4	7.5	7.5	7.5	85.381	765	765	0	9.2788	By MS/MS	By MS/MS	5.6	7.5	16587000	8011400	8575900	0	8144400	3	4	7				745	2640;3014;3085;4321	True;True;True;True	2710;3093;3165;4458	5513;5514;6267;6268;6404;6405;9375	5242;5957;5958;5959;6091;6092;8906	5242;5959;6091;8906
SPBC776.09|ste13|II|ATP-dependent	SPBC776.09|ste13|II|ATP-dependent	4	4	4	>SPBC776.09|ste13|II|ATP-dependent RNA helicase Ste13	1	4	4	4	3	4	3	4	3	4	9.5	9.5	9.5	54.794	485	485	0	14.763	By MS/MS	By MS/MS	7.4	9.5	93459000	29151000	64308000	48551000	41672000	3	4	7				746	1682;2241;3689;4331	True;True;True;True	1724;2295;3810;4468	3591;3592;4710;8015;8016;9394;9395	3389;3390;4467;7630;7631;8926;8927	3390;4467;7631;8926
SPBC776.10c|cog6|II|Golgi	SPBC776.10c|cog6|II|Golgi	3	3	3	>SPBC776.10c|cog6|II|Golgi transport complex peripheral subunit Cog6 (predicted)	1	3	3	3	2	1	2	1	2	1	5.5	5.5	5.5	77.326	675	675	0	2.2562	By MS/MS	By MS/MS	3.6	1.9	5408600	2181700	3226900	2181700	0	2	1	3				747	386;3210;3569	True;True;True	398;3290;3686	846;6666;7752	798;6337;7377	798;6337;7377
SPBC776.11|rpl2801|II|60S	SPBC776.11|rpl2801|II|60S	9	3	3	>SPBC776.11|rpl2801|II|60S ribosomal protein L27/L28	1	9	3	3	8	9	2	3	2	3	56.1	15.5	15.5	16.685	148	148	0	13.341	By MS/MS	By MS/MS	54.7	56.1	190420000	71073000	119350000	85717000	98700000	3	3	6				748	146;1656;2963;3194;3487;3532;3623;3999;5280	False;True;True;True;False;False;False;False;False	154;1696;3042;3274;3600;3648;3742;4132;5450	414;415;3533;6170;6171;6635;6636;7561;7562;7661;7662;7880;7881;7882;7883;8737;8738;8739;8740;11466;11467	383;384;3332;5868;5869;6308;6309;6310;7196;7197;7198;7292;7293;7505;7506;7507;8307;8308;8309;8310;8311;10922;10923	384;3332;5868;6310;7196;7293;7507;8309;10922
SPBC776.15c|kgd2|II|dihydrolipoamide	SPBC776.15c|kgd2|II|dihydrolipoamide	2	2	2	>SPBC776.15c|kgd2|II|dihydrolipoamide S-succinyltransferase, e2 component of oxoglutarate dehydrogenase complex Kdg2 (predicted)	1	2	2	2	2	0	2	0	2	0	3.5	3.5	3.5	48.964	452	452	0	3.034	By MS/MS	By matching	3.5	0	6612000	6612000	0	6612000	0	2	0	2				749	846;2060	True;True	875;2105	1782;4330	1686;4111	1686;4111
SPBC800.05c|atb2|II|tubulin	SPBC800.05c|atb2|II|tubulin	3	1	1	>SPBC800.05c|atb2|II|tubulin alpha 2	1	3	1	1	2	3	1	1	1	1	9.4	3.6	3.6	50.535	449	449	0	5.0298	By matching	By MS/MS	6.9	9.4	13006000	5222800	7783500	0	7391800	0	1	1				750	2081;2591;4053	True;False;False	2126;2661;4186	4366;4367;5438;8854;8855	4143;5167;8417;8418	4143;5167;8418
SPBC83.08|rvb2|II|AAA	SPBC83.08|rvb2|II|AAA	5	5	5	>SPBC83.08|rvb2|II|AAA family ATPase Rvb2	1	5	5	5	5	4	5	4	5	4	14.8	14.8	14.8	51.561	465	465	0	7.5853	By MS/MS	By MS/MS	14.8	11.2	53179000	28144000	25035000	26687000	25232000	4	2	6				751	1117;1552;4280;4565;4867	True;True;True;True;True	1149;1589;4417;4713;5028	2321;3323;3324;9293;9294;9929;9930;10581;10582	2185;3124;8826;8827;9422;10041;10042	2185;3124;8826;9422;10042
SPBC83.16c|SPBC83.16c|II|conserved	SPBC83.16c|SPBC83.16c|II|conserved	2	2	2	>SPBC83.16c|SPBC83.16c|II|conserved eukaryotic protein	1	2	2	2	2	1	2	1	2	1	4.3	4.3	4.3	63.484	563	563	0	4.9732	By MS/MS	By MS/MS	4.3	2.5	17434000	13748000	3686000	8465800	8782900	4	2	6				752	1784;4370	True;True	1827;4508	3796;3797;3798;3799;9470	3595;3596;3597;3598;3599;9001	3595;9001
SPBC83.17|mbf1|II|transcriptional	SPBC83.17|mbf1|II|transcriptional	1	1	1	>SPBC83.17|mbf1|II|transcriptional coactivator, multiprotein bridging factor Mbf1 (predicted)	1	1	1	1	1	1	1	1	1	1	10.1	10.1	10.1	15.979	148	148	0	2.9986	By MS/MS	By MS/MS	10.1	10.1	15354000	9624900	5729500	0	5441300	2	1	3				753	2194	TRUE	2245	4605;4606	4364;4365;4366	4365
SPBC839.05c|rps1701|II|40S;SPCC24B10.09|rps1702|III|40S	SPBC839.05c|rps1701|II|40S;SPCC24B10.09|rps1702|III|40S	4;3	4;3	4;3	>SPBC839.05c|rps1701|II|40S ribosomal protein S17 (predicted);>SPCC24B10.09|rps1702|III|40S ribosomal protein S17 (predicted)	2	4	4	4	2	4	2	4	2	4	31.3	31.3	31.3	15.514	131	131;132	0	17.53	By MS/MS	By MS/MS	16	31.3	89918000	36037000	53880000	42757000	44450000	4	5	9				754	1936;2317;3107;4078	True;True;True;True	1980;2372;3187;4211	4097;4861;4862;6448;6449;8911	3886;4609;4610;4611;4612;6130;6131;6132;8476	3886;4611;6130;8476
SPBC839.08c|its8|II|pig-N	SPBC839.08c|its8|II|pig-N	1	1	1	>SPBC839.08c|its8|II|pig-N (predicted)	1	1	1	1	0	1	0	1	0	1	1.4	1.4	1.4	106.4	935	935	0	2.7992	By matching	By MS/MS	0	1.4	0	0	0	0	0	0	1	1				755	2669	TRUE	2741	5588	5315	5315
SPBC839.16|thf1|II|C1-5,6,7,8-tetrahydrofolate	SPBC839.16|thf1|II|C1-5,6,7,8-tetrahydrofolate	20	20	20	>SPBC839.16|thf1|II|C1-5,6,7,8-tetrahydrofolate (THF) synthase, trifunctional enzyme Thf1	1	20	20	20	17	18	17	18	17	18	27	27	27	101.2	937	937	0	51.478	By MS/MS	By MS/MS	23.2	23.6	493120000	226940000	266180000	247070000	232660000	17	21	38				756	297;599;875;1451;1727;1916;2593;2905;3021;3242;3379;3605;3750;3971;4251;4273;4333;4571;4942;5266	True;True;True;True;True;True;True;True;True;True;True;True;True;True;True;True;True;True;True;True	307;618;904;1487;1769;1960;2663;2981;3100;3334;3490;3724;3874;4103;4386;4409;4470;4719;5105;5435	695;696;1291;1292;1831;1832;3071;3072;3675;3676;4062;4063;5441;6051;6052;6279;6280;6825;6826;6827;7349;7350;7848;8163;8683;9232;9280;9281;9397;9398;9399;9400;9940;9941;10715;10716;11434;11435	654;655;1216;1217;1733;1734;2894;2895;3477;3478;3855;3856;5170;5753;5754;5755;5969;5970;6484;6485;6987;6988;6989;7472;7781;8254;8771;8812;8813;8814;8929;8930;8931;9433;9434;10176;10177;10889;10890	654;1217;1734;2895;3478;3855;5170;5755;5969;6485;6987;7472;7781;8254;8771;8813;8930;9434;10176;10890
SPBC839.17c|fkh1|II|FKBP12	SPBC839.17c|fkh1|II|FKBP12	1	1	1	>SPBC839.17c|fkh1|II|FKBP12 peptidyl-prolyl cis-trans isomerase Fkh1	1	1	1	1	1	1	1	1	1	1	10.7	10.7	10.7	12.043	112	112	0	5.2385	By MS/MS	By MS/MS	10.7	10.7	30958000	12538000	18420000	0	17493000	1	1	2				757	3105	TRUE	3185	6444;6445	6126;6127	6126
SPBC887.09c|sog2|II|leucine-rich	SPBC887.09c|sog2|II|leucine-rich	12	12	12	>SPBC887.09c|sog2|II|leucine-rich repeat protein Lrp1	1	12	12	12	10	7	10	7	10	7	20.9	20.9	20.9	96.992	886	886	0	30.519	By MS/MS	By MS/MS	18.1	9.5	51142000	36263000	14879000	34556000	15837000	10	4	14				758	710;815;990;1558;1900;2028;2637;2654;2896;3471;3688;4027	True;True;True;True;True;True;True;True;True;True;True;True	733;844;1021;1595;1943;2073;2707;2726;2972;3584;3809;4160	1511;1512;1726;2071;2072;3334;4029;4030;4277;5510;5562;5563;6036;7531;8014;8803;8804	1428;1635;1956;3134;3821;3822;4056;5239;5292;5739;7165;7629;8368;8369	1428;1635;1956;3134;3821;4056;5239;5292;5739;7165;7629;8368
SPBC887.15c|sur2|II|sphingosine	SPBC887.15c|sur2|II|sphingosine	2	2	2	>SPBC887.15c|sur2|II|sphingosine hydroxylase Sur2	1	2	2	2	2	2	2	2	2	2	9.2	9.2	9.2	34.19	293	293	0	5.6451	By MS/MS	By MS/MS	9.2	9.2	23961000	10433000	13528000	10673000	12607000	3	2	5				759	3442;5277	True;True	3553;5447	7477;7478;11458;11459;11460;11461	7112;7113;10915;10916;10917	7113;10915
SPBC887.17|SPBC887.17|II|transmembrane	SPBC887.17|SPBC887.17|II|transmembrane	1	1	1	>SPBC887.17|SPBC887.17|II|transmembrane transporter (predicted)	1	1	1	1	1	0	1	0	1	0	1.8	1.8	1.8	68.562	625	625	0.0095339	0.93088	By MS/MS	By matching	1.8	0	0	0	0	0	0	1	0	1				760	4737	TRUE	4894	10315	9783	9783
SPBC887.18c|hfi1|II|SAGA	SPBC887.18c|hfi1|II|SAGA	2	2	2	>SPBC887.18c|hfi1|II|SAGA complex subunit Hfi1	1	2	2	2	2	1	2	1	2	1	8.6	8.6	8.6	37.945	339	339	0	1.8525	By MS/MS	By MS/MS	8.6	5	3791000	1788600	2002400	0	1901600	1	1	2				761	948;3525	True;True	977;3641	1990;1991;7649	1879;7282	1879;7282
SPBC8D2.01|gsk31|II|serine/threonine	SPBC8D2.01|gsk31|II|serine/threonine	3	3	3	>SPBC8D2.01|gsk31|II|serine/threonine protein kinase Gsk31 (predicted)	1	3	3	3	2	3	2	3	2	3	8.7	8.7	8.7	43.381	381	381	0	3.981	By matching	By MS/MS	5	8.7	8096200	3872600	4223600	3864100	4019600	0	3	3				762	357;3149;3196	True;True;True	368;3229;3276	797;6532;6533;6639;6640	755;6210;6313	755;6210;6313
SPBC8D2.02c|vps68|II|vacuolar	SPBC8D2.02c|vps68|II|vacuolar	2	2	2	>SPBC8D2.02c|vps68|II|vacuolar sorting protein Vps68 (predicted)	1	2	2	2	2	1	2	1	2	1	14.1	14.1	14.1	18.816	170	170	0	2.8681	By MS/MS	By MS/MS	14.1	5.3	8817800	7421800	1396100	7421800	0	2	1	3				763	3051;4489	True;True	3130;4633	6335;9757;9758	6027;9265;9266	6027;9265
SPBC8D2.06|irs1|II|cytoplasmic	SPBC8D2.06|irs1|II|cytoplasmic	18	18	18	>SPBC8D2.06|irs1|II|cytoplasmic isoleucine-tRNA ligase Irs1 (predicted)	1	18	18	18	16	16	16	16	16	16	20	20	20	122.91	1064	1064	0	56.79	By MS/MS	By MS/MS	18.3	18.1	319280000	121610000	197660000	131680000	177650000	16	15	31				764	308;340;477;749;750;921;960;1072;2124;2182;2341;3208;3600;3921;4279;5145;5238;5285	True;True;True;True;True;True;True;True;True;True;True;True;True;True;True;True;True;True	319;351;492;773;774;950;989;1104;2172;2232;2397;3288;3719;4051;4416;5312;5407;5455	711;712;766;1035;1036;1597;1598;1599;1600;1601;1930;2012;2013;2237;2238;4464;4465;4580;4581;4912;6662;6663;7837;7838;8582;8583;9292;11103;11104;11384;11385;11477;11478	671;672;724;971;972;1509;1510;1511;1512;1513;1514;1828;1898;2110;2111;4236;4342;4343;4661;6333;6334;7461;7462;8162;8163;8825;10553;10554;10841;10842;10934;10935	671;724;972;1510;1514;1828;1898;2110;4236;4343;4661;6333;7462;8162;8825;10554;10842;10935
SPBC8D2.18c|SPBC8D2.18c|II|adenosylhomocysteinase	SPBC8D2.18c|SPBC8D2.18c|II|adenosylhomocysteinase	16	16	16	>SPBC8D2.18c|SPBC8D2.18c|II|adenosylhomocysteinase (predicted)	1	16	16	16	16	16	16	16	16	16	42	42	42	47.383	433	433	0	64.916	By MS/MS	By MS/MS	42	42	828810000	401720000	427090000	419250000	388070000	19	21	40				765	792;793;961;1061;1175;1477;1566;1821;1868;2799;3115;3958;4059;4652;4692;4954	True;True;True;True;True;True;True;True;True;True;True;True;True;True;True;True	819;820;990;1092;1207;1513;1603;1864;1911;2873;3195;4090;4192;4803;4845;5117	1680;1681;1682;1683;1684;1685;2014;2015;2016;2217;2218;2433;2434;3130;3131;3351;3352;3353;3354;3873;3874;3971;3972;5848;5849;6463;6464;8659;8660;8871;8872;8873;8874;10105;10106;10225;10226;10736;10737	1588;1589;1590;1591;1592;1593;1594;1899;1900;1901;2091;2092;2297;2298;2946;2947;3150;3151;3152;3153;3154;3155;3672;3673;3764;3765;5560;5561;6146;8233;8436;8437;8438;8439;9588;9589;9701;9702;10198;10199	1588;1592;1900;2091;2297;2947;3153;3672;3765;5561;6146;8233;8436;9589;9701;10199
SPBC8E4.01c|pho84|II|inorganic;SPBC1683.01|SPBC1683.01|II|inorganic	SPBC8E4.01c|pho84|II|inorganic	4;1	4;1	4;1	>SPBC8E4.01c|pho84|II|inorganic phosphate transmembrane transporter (predicted)	2	4	4	4	4	4	4	4	4	4	12.1	12.1	12.1	63.645	572	572;573	0	16.82	By MS/MS	By MS/MS	12.1	12.1	82050000	57475000	24575000	48187000	32626000	4	4	8				766	533;3003;3907;5201	True;True;True;True	549;3082;4035;5369	1148;1149;6241;6242;8552;8553;8554;8555;11199;11200	1078;1079;5932;5933;8132;8133;8134;10647	1078;5932;8133;10647
SPBC902.04|rmn1|II|RNA-binding	SPBC902.04|rmn1|II|RNA-binding	4	4	4	>SPBC902.04|rmn1|II|RNA-binding protein	1	4	4	4	4	3	4	3	4	3	10	10	10	66.898	589	589	0	5.423	By MS/MS	By MS/MS	10	5.6	29377000	13037000	16340000	11946000	16609000	4	2	6				767	2050;2914;3389;5321	True;True;True;True	2095;2992;3500;5491	4312;4313;6071;6072;7366;7367;11553	4092;4093;5775;5776;7006;7007;11001	4092;5776;7006;11001
SPBC902.05c|idh2|II|isocitrate	SPBC902.05c|idh2|II|isocitrate	1	1	1	>SPBC902.05c|idh2|II|isocitrate dehydrogenase (NAD+) subunit 2	1	1	1	1	1	1	1	1	1	1	4.5	4.5	4.5	41.188	379	379	0	5.8476	By MS/MS	By MS/MS	4.5	4.5	3960000	1636700	2323300	0	2206400	1	1	2				768	3835	TRUE	3963	8425;8426	8015;8016	8016
SPBC902.06|mto2|II|MT	SPBC902.06|mto2|II|MT	10	10	10	>SPBC902.06|mto2|II|MT organizer Mto2	1	10	10	10	10	10	10	10	10	10	44.8	44.8	44.8	44.017	397	397	0	186.24	By MS/MS	By MS/MS	44.8	44.8	9217500000	4926000000	4291500000	4846500000	4133500000	22	19	41				769	581;1088;2946;3223;3608;3931;4062;4170;5023;5024	True;True;True;True;True;True;True;True;True;True	600;1120;3025;3304;3727;4062;4195;4303;5188;5189	1258;1259;2269;2270;2271;2272;6136;6137;6690;6691;6692;6693;6694;6695;7853;7854;7855;7856;7857;8603;8604;8879;8880;8881;8882;9085;9086;9087;9088;10862;10863;10864;10865;10866;10867;10868;10869	1185;1186;2137;2138;2139;2140;5836;6358;6359;6360;6361;6362;6363;6364;6365;7477;7478;7479;7480;7481;7482;7483;8181;8182;8443;8444;8445;8446;8447;8448;8635;8636;8637;10314;10315;10316;10317;10318;10319;10320;10321	1185;2139;5836;6363;7478;8181;8443;8637;10314;10321
SPBC947.02|apl2|II|AP-1	SPBC947.02|apl2|II|AP-1	4	4	4	>SPBC947.02|apl2|II|AP-1 adaptor complex subunit beta subunit Apl2	1	4	4	4	2	4	2	4	2	4	6.6	6.6	6.6	76.681	683	683	0	5.2002	By MS/MS	By MS/MS	4	6.6	20537000	11007000	9529800	11890000	8167500	2	2	4				770	1993;2300;3388;5096	True;True;True;True	2038;2355;3499;5262	4210;4831;4832;7365;11004;11005	3994;4584;7005;10453	3994;4584;7005;10453
SPBC947.15c|nde1|II|mitochondrial	SPBC947.15c|nde1|II|mitochondrial	1	1	1	>SPBC947.15c|nde1|II|mitochondrial NADH dehydrogenase (ubiquinone) Nde1 (predicted)	1	1	1	1	1	1	1	1	1	1	1.6	1.6	1.6	60.78	551	551	0	1.7204	By MS/MS	By MS/MS	1.6	1.6	2582000	2582000	0	2582000	0	1	1	2				771	2032	TRUE	2077	4282;4283	4062;4063	4062
SPBC9B6.04c|tuf1|II|mitochondrial	SPBC9B6.04c|tuf1|II|mitochondrial	7	7	7	>SPBC9B6.04c|tuf1|II|mitochondrial translation elongation factor EF-Tu Tuf1	1	7	7	7	6	7	6	7	6	7	23	23	23	48.282	439	439	0	29.385	By MS/MS	By MS/MS	19.8	23	106580000	40974000	65607000	45645000	54568000	6	6	12				772	894;1438;1568;1619;2911;4385;5383	True;True;True;True;True;True;True	923;1474;1605;1657;2988;4523;5555	1869;1870;3042;3043;3357;3358;3359;3455;3456;6064;9499;9500;11678;11679	1773;1774;2866;2867;3159;3160;3257;3258;5766;9028;11124;11125	1774;2866;3159;3258;5766;9028;11125	164	235
SPBP16F5.03c|tra1|II|SAGA	SPBP16F5.03c|tra1|II|SAGA	60	60	58	>SPBP16F5.03c|tra1|II|SAGA complex phosphatidylinositol pseudokinase Tra1	1	60	60	58	50	51	50	51	48	50	18.2	18.2	17.8	422.33	3699	3699	0	152.47	By MS/MS	By MS/MS	15.2	15.8	658110000	359670000	298440000	344240000	298860000	46	50	96				773	269;304;490;549;571;882;942;966;989;1046;1054;1094;1139;1170;1434;1487;1497;1536;1613;1740;1944;2093;2314;2357;2374;2533;2753;2771;2792;2822;2892;2893;2898;2900;2980;2984;3017;3073;3184;3187;3215;3259;3372;3391;3416;3546;3622;3705;3710;4085;4137;4294;4319;4361;4396;4527;4839;4870;5143;5348	True;True;True;True;True;True;True;True;True;True;True;True;True;True;True;True;True;True;True;True;True;True;True;True;True;True;True;True;True;True;True;True;True;True;True;True;True;True;True;True;True;True;True;True;True;True;True;True;True;True;True;True;True;True;True;True;True;True;True;True	278;315;505;565;590;911;971;996;1020;1077;1085;1126;1171;1202;1470;1523;1533;1572;1651;1782;1988;2139;2369;2413;2430;2601;2827;2845;2866;2896;2968;2969;2974;2976;3059;3063;3096;3153;3264;3267;3295;3357;3483;3502;3527;3662;3741;3827;3832;4218;4270;4431;4456;4499;4535;4673;4999;5031;5310;5520	646;647;705;1058;1059;1186;1234;1235;1851;1971;1972;2028;2070;2188;2201;2202;2203;2204;2280;2281;2364;2421;2422;3037;3038;3148;3149;3166;3167;3252;3445;3446;3708;3709;4112;4113;4394;4395;4856;4943;4944;4974;4975;5326;5327;5760;5792;5793;5833;5890;5891;6028;6029;6030;6039;6040;6042;6043;6200;6209;6271;6272;6383;6384;6614;6615;6616;6617;6623;6624;6674;6675;6871;6872;7333;7334;7335;7336;7370;7371;74…	607;608;665;990;1115;1159;1756;1864;1865;1913;1955;2065;2077;2078;2079;2080;2148;2149;2231;2286;2287;2860;2861;2862;2964;2979;2980;3063;3246;3247;3509;3899;3900;4170;4171;4172;4605;4689;4690;4723;4724;5058;5059;5472;5505;5506;5547;5605;5606;5732;5733;5734;5742;5743;5745;5746;5895;5905;5962;5963;6071;6072;6289;6290;6291;6297;6298;6343;6344;6524;6972;6973;6974;7010;7011;7060;7061;7318;7319;7504;767…	608;665;990;1115;1159;1756;1865;1913;1955;2065;2077;2149;2231;2287;2861;2964;2980;3063;3246;3509;3900;4171;4605;4689;4723;5058;5472;5506;5547;5606;5732;5733;5742;5745;5895;5905;5962;6072;6291;6297;6344;6524;6972;7011;7060;7319;7504;7671;7679;8488;8576;8848;8903;8983;9048;9350;9984;10046;10550;11047	165	3691
SPBP16F5.08c|SPBP16F5.08c|II|flavin	SPBP16F5.08c|SPBP16F5.08c|II|flavin	5	5	5	>SPBP16F5.08c|SPBP16F5.08c|II|flavin dependent monooxygenase (predicted)	1	5	5	5	5	5	5	5	5	5	10.1	10.1	10.1	49.889	447	447	0	16.428	By MS/MS	By MS/MS	10.1	10.1	42714000	20463000	22251000	20927000	20667000	4	4	8				774	1200;1939;2370;2556;2557	True;True;True;True;True	1233;1983;2426;2625;2626	2485;2486;4102;4103;4967;4968;5375;5376;5377;5378	2351;2352;3890;4716;4717;5107;5108;5109	2352;3890;4717;5107;5109
SPBP19A11.03c|mts4|II|19S	SPBP19A11.03c|mts4|II|19S	6	6	6	>SPBP19A11.03c|mts4|II|19S proteasome regulatory subunit Mts4	1	6	6	6	4	6	4	6	4	6	7.5	7.5	7.5	97.998	891	891	0	13.464	By MS/MS	By MS/MS	5.7	7.5	33612000	11623000	21989000	16423000	16082000	3	5	8				775	1062;1692;1953;2031;2404;4796	True;True;True;True;True;True	1093;1734;1997;2076;2461;4954	2219;3607;3608;4130;4131;4281;5036;5037;10432;10433	2093;3404;3405;3917;3918;4061;4782;9891;9892	2093;3404;3917;4061;4782;9891
SPBP22H7.08|rps1002|II|40S	SPBP22H7.08|rps1002|II|40S	4	4	2	>SPBP22H7.08|rps1002|II|40S ribosomal protein S10 (predicted)	1	4	4	2	4	4	4	4	2	2	39.5	39.5	20.4	16.443	147	147	0	18.024	By MS/MS	By MS/MS	39.5	39.5	184990000	119700000	65296000	115800000	63380000	4	4	8				776	206;1131;1869;2391	True;True;True;True	214;1163;1912;2447	524;525;2350;2351;2352;3973;3974;5009;5010	489;490;2218;2219;3766;3767;4756;4757	489;2219;3766;4756
SPBP23A10.05|ssr4|II|SWI/SNF	SPBP23A10.05|ssr4|II|SWI/SNF	1	1	1	>SPBP23A10.05|ssr4|II|SWI/SNF and RSC complex subunit Ssr4	1	1	1	1	1	1	1	1	1	1	4.3	4.3	4.3	44.254	395	395	0	4.2627	By MS/MS	By matching	4.3	4.3	4625300	3068100	1557300	0	1478900	1	0	1				777	33	TRUE	34	66;67	66	66
SPBP23A10.07|rpa2|II|DNA-directed	SPBP23A10.07|rpa2|II|DNA-directed	6	6	6	>SPBP23A10.07|rpa2|II|DNA-directed RNA polymerase I complex subunit Rpa2	1	6	6	6	6	3	6	3	6	3	6.4	6.4	6.4	131.69	1174	1174	0	12.149	By MS/MS	By MS/MS	6.4	3.1	39835000	25360000	14475000	20581000	18526000	6	2	8				778	1440;1493;2574;3019;3829;5088	True;True;True;True;True;True	1476;1529;2644;3098;3957;5254	3046;3047;3159;5409;5410;6274;8414;10987;10988	2870;2871;2974;5139;5140;5965;8006;10437	2871;2974;5140;5965;8006;10437
SPBP23A10.08|alp5|II|actin-like	SPBP23A10.08|alp5|II|actin-like	1	1	1	>SPBP23A10.08|alp5|II|actin-like protein Arp4	1	1	1	1	1	1	1	1	1	1	1.6	1.6	1.6	48.772	433	433	0	1.7912	By MS/MS	By MS/MS	1.6	1.6	252890000	126790000	126100000	0	119760000	1	1	2				779	3010	TRUE	3089	6256;6257	5947;5948	5948
SPBP23A10.15c|qcr1|II|mitochondrial	SPBP23A10.15c|qcr1|II|mitochondrial	2	2	2	>SPBP23A10.15c|qcr1|II|mitochondrial processing peptidase (MPP) complex beta subunit Mas1 (predicted)	1	2	2	2	1	1	1	1	1	1	4.2	4.2	4.2	50.737	457	457	0	5.3364	By MS/MS	By MS/MS	2.4	1.8	0	0	0	0	0	1	1	2				780	861;2071	True;True	890;2116	1807;4350	1711;4128	1711;4128
SPBP23A10.16|sdh4|II|TIM22	SPBP23A10.16|sdh4|II|TIM22	1	1	1	>SPBP23A10.16|sdh4|II|TIM22 inner membrane protein import complex anchor subunit Tim18	1	1	1	1	1	1	1	1	1	1	8.8	8.8	8.8	17.744	159	159	0	2.7848	By MS/MS	By MS/MS	8.8	8.8	4895300	1993400	2901800	0	2755800	1	1	2				781	1696	TRUE	1738	3614;3615	3410;3411	3410
SPBP35G2.07|ilv1|II|acetolactate	SPBP35G2.07|ilv1|II|acetolactate	16	16	16	>SPBP35G2.07|ilv1|II|acetolactate synthase catalytic subunit	1	16	16	16	15	15	15	15	15	15	29.6	29.6	29.6	73.193	669	669	0	51.904	By MS/MS	By MS/MS	27.5	27.8	406550000	192820000	213740000	193710000	202080000	17	16	33				782	278;787;919;1051;1168;1317;1513;1640;1777;3007;3834;4163;4262;4418;5035;5098	True;True;True;True;True;True;True;True;True;True;True;True;True;True;True;True	287;814;948;1082;1200;1352;1549;1679;1820;3086;3962;4296;4398;4559;5200;5264	661;1672;1673;1925;1926;1927;2195;2196;2418;2419;2739;2740;3202;3203;3502;3503;3786;6248;6249;6250;6251;8423;8424;9068;9069;9070;9071;9258;9259;9586;9587;10888;10889;11008;11009;11010;11011	620;1579;1580;1823;1824;1825;2072;2073;2283;2284;2586;2587;3015;3016;3017;3302;3584;5940;5941;5942;8013;8014;8618;8619;8620;8621;8794;9105;10341;10342;10456;10457;10458	620;1580;1823;2073;2284;2587;3015;3302;3584;5940;8014;8619;8794;9105;10342;10456
SPBP4G3.02|pho1|II|acid	SPBP4G3.02|pho1|II|acid	2	2	2	>SPBP4G3.02|pho1|II|acid phosphatase Pho1	1	2	2	2	1	2	1	2	1	2	6.2	6.2	6.2	50.557	453	453	0	12.048	By MS/MS	By MS/MS	1.8	6.2	14347000	4652900	9694100	0	9206400	1	2	3				783	3490;4742	True;True	3603;4899	7569;10323;10324	7205;9791;9792	7205;9792
SPBP4H10.11c|lcf2|II|long-chain-fatty-acid-CoA	SPBP4H10.11c|lcf2|II|long-chain-fatty-acid-CoA	2	2	2	>SPBP4H10.11c|lcf2|II|long-chain-fatty-acid-CoA ligase	1	2	2	2	1	2	1	2	1	2	3.9	3.9	3.9	75.79	689	689	0	2.4932	By MS/MS	By MS/MS	1.6	3.9	6401000	3452600	2948500	0	2800100	1	2	3				784	203;1633	True;True	211;1672	518;519;3488	481;482;3289	482;3289
SPBP4H10.20|nhm1|II|m7G(5')pppN	SPBP4H10.20|nhm1|II|m7G(5')pppN	4	4	4	>SPBP4H10.20|nhm1|II|m7G(5)pppN diphosphatase Nhm1	1	4	4	4	3	4	3	4	3	4	15.5	15.5	15.5	35.106	304	304	0	9.9567	By MS/MS	By MS/MS	11.5	15.5	21629000	10857000	10773000	10888000	10199000	3	4	7				785	214;1639;2249;4337	True;True;True;True	222;1678;2303;4474	537;538;3500;3501;4725;9406;9407	503;504;3300;3301;4483;8936;8937	504;3300;4483;8937
SPBP8B7.02|rng9|II|contractile	SPBP8B7.02|rng9|II|contractile	12	12	12	>SPBP8B7.02|rng9|II|contractile ring myosin V regulator Rng9	1	12	12	12	12	12	12	12	12	12	65.9	65.9	65.9	30.025	261	261	0	146.21	By MS/MS	By MS/MS	65.9	65.9	461810000	251000000	210810000	234780000	216420000	14	16	30				786	83;2433;2434;2644;3036;3375;3589;3783;4082;4183;4186;5019	True;True;True;True;True;True;True;True;True;True;True;True	90;2493;2494;2716;3115;3486;3708;3908;4215;4318;4321;5184	186;187;5097;5098;5099;5100;5544;5545;6306;6307;6308;6309;7340;7341;7342;7343;7817;7818;8227;8228;8916;8917;8918;8919;9111;9112;9117;9118;10856;10857	181;182;183;4837;4838;4839;5273;5274;5997;5998;5999;6000;6001;6978;6979;6980;6981;7443;7444;7838;7839;8481;8482;8483;8484;8661;8662;8663;8667;10309	181;4837;4839;5273;5997;6979;7444;7838;8484;8661;8667;10309
SPBP8B7.05c|nce103|II|carbonic	SPBP8B7.05c|nce103|II|carbonic	1	1	1	>SPBP8B7.05c|nce103|II|carbonic anhydrase (predicted)	1	1	1	1	0	1	0	1	0	1	5.5	5.5	5.5	37.009	328	328	0	7.3943	By matching	By MS/MS	0	5.5	36970000	0	36970000	0	35110000	0	2	2				787	4957	TRUE	5120	10741	10204;10205	10205
SPBP8B7.17c|SPBP8B7.17c|II|phosphomethylpyrimidine	SPBP8B7.17c|SPBP8B7.17c|II|phosphomethylpyrimidine	2	2	2	>SPBP8B7.17c|SPBP8B7.17c|II|phosphomethylpyrimidine kinase (predicted)	1	2	2	2	2	2	2	2	2	2	5.1	5.1	5.1	55.753	506	506	0	2.924	By MS/MS	By MS/MS	5.1	5.1	5276400	2890200	2386200	0	2266100	2	1	3				788	96;4989	True;True	103;5152	326;327;10797;10798	304;10258;10259	304;10259
SPBP8B7.18c|SPBP8B7.18c|II|phosphomethylpyrimidine	SPBP8B7.18c|SPBP8B7.18c|II|phosphomethylpyrimidine	11	11	11	>SPBP8B7.18c|SPBP8B7.18c|II|phosphomethylpyrimidine kinase (predicted)	1	11	11	11	10	9	10	9	10	9	32.7	32.7	32.7	61.354	551	551	0	37.042	By MS/MS	By MS/MS	28.3	26.7	173730000	74077000	99650000	70514000	98199000	7	10	17				789	1030;1196;1432;1691;2349;3185;3498;3619;3643;4200;5179	True;True;True;True;True;True;True;True;True;True;True	1061;1229;1468;1733;2405;3265;3611;3738;3762;4335;5346	2158;2159;2480;3033;3034;3605;3606;4927;6618;6619;6620;7582;7874;7875;7920;7921;9141;9142;11158;11159	2039;2040;2346;2858;3403;4675;4676;6292;6293;6294;7216;7500;7542;7543;8690;8691;10609	2040;2346;2858;3403;4675;6292;7216;7500;7542;8691;10609
SPBP8B7.22|erd2|II|HDEL	SPBP8B7.22|erd2|II|HDEL	1	1	1	>SPBP8B7.22|erd2|II|HDEL receptor (predicted)	1	1	1	1	1	1	1	1	1	1	4.7	4.7	4.7	24.724	212	212	0.0044543	1.3085	By MS/MS	By MS/MS	4.7	4.7	3248700	1357200	1891500	0	1796400	1	1	2				790	1617	TRUE	1655	3452;3453	3254;3255	3254
SPBP8B7.23|rnf10|II|ubiquitin-protein	SPBP8B7.23|rnf10|II|ubiquitin-protein	1	1	1	>SPBP8B7.23|rnf10|II|ubiquitin-protein ligase E3 implicated in transcription (predicted)	1	1	1	1	1	0	1	0	1	0	1.8	1.8	1.8	76.459	673	673	0	2.1014	By MS/MS	By matching	1.8	0	1909400	1909400	0	1909400	0	1	0	1				791	2284	TRUE	2339	4801	4557	4557
SPBP8B7.25|cyp4|II|cyclophilin	SPBP8B7.25|cyp4|II|cyclophilin	1	1	1	>SPBP8B7.25|cyp4|II|cyclophilin family peptidyl-prolyl cis-trans isomerase Cyp4 (predicted)	1	1	1	1	1	1	1	1	1	1	4	4	4	22.156	201	201	0	2.0462	By MS/MS	By MS/MS	4	4	5964800	2907900	3056800	0	2903000	1	1	2				792	5039	TRUE	5204	10895;10896	10348;10349	10348
SPBPB2B2.12c|gal10|II|UDP-glucose	SPBPB2B2.12c|gal10|II|UDP-glucose	1	1	1	>SPBPB2B2.12c|gal10|II|UDP-glucose 4-epimerase/aldose 1-epimerase Gal10	1	1	1	1	1	0	1	0	1	0	1.3	1.3	1.3	80.665	713	713	0	3.0473	By MS/MS	By matching	1.3	0	1749100	1749100	0	1749100	0	1	0	1				793	3659	TRUE	3778	7950	7570	7570
SPBPB7E8.02|SPBPB7E8.02|II|PSP1	SPBPB7E8.02|SPBPB7E8.02|II|PSP1	2	2	2	>SPBPB7E8.02|SPBPB7E8.02|II|PSP1 family protein	1	2	2	2	1	1	1	1	1	1	5.2	5.2	5.2	82.21	749	749	0	3.2853	By MS/MS	By MS/MS	2.9	2.3	7810800	7810800	0	7810800	0	2	1	3				794	1367;2742	True;True	1403;2816	2835;5743	2680;2681;5456	2680;5456
SPBPJ4664.01|dps1|II|decaprenyl	SPBPJ4664.01|dps1|II|decaprenyl	1	1	1	>SPBPJ4664.01|dps1|II|decaprenyl diphosphate synthase subunit Dps1	1	1	1	1	1	1	1	1	1	1	2.9	2.9	2.9	42.046	378	378	0	1.8236	By MS/MS	By matching	2.9	2.9	3359200	1751000	1608200	0	1527300	1	0	1				795	4033	TRUE	4166	8814;8815	8378	8378
SPBPJ4664.04|cop1|II|coatomer	SPBPJ4664.04|cop1|II|coatomer	34	34	34	>SPBPJ4664.04|cop1|II|coatomer alpha subunit Cop1 (predicted)	1	34	34	34	30	30	30	30	30	30	38.3	38.3	38.3	136.37	1207	1207	0	161.42	By MS/MS	By MS/MS	33.4	35.1	744290000	384640000	359660000	374010000	335360000	32	28	60				796	6;725;802;1273;1416;1525;1537;1700;1717;1754;1921;1930;2198;2238;2368;2395;2416;2876;2934;3048;3521;3793;3998;4051;4147;4175;4441;4477;4678;4702;5102;5115;5199;5308	True;True;True;True;True;True;True;True;True;True;True;True;True;True;True;True;True;True;True;True;True;True;True;True;True;True;True;True;True;True;True;True;True;True	6;749;829;1308;1452;1561;1573;1742;1759;1797;1965;1974;2250;2291;2424;2451;2474;2951;3012;3127;3636;3918;4131;4184;4280;4308;4583;4621;4831;4855;5268;5281;5367;5478	11;12;1543;1544;1545;1699;1700;2654;2655;3006;3007;3225;3226;3253;3254;3620;3621;3622;3653;3654;3738;3739;4071;4072;4086;4087;4616;4617;4618;4701;4702;4965;5017;5059;5997;5998;5999;6110;6111;6331;7640;7641;8328;8329;8736;8850;8851;9040;9041;9096;9097;9098;9640;9641;9731;9732;10160;10161;10162;10163;10245;11017;11018;11040;11196;11524;11525	11;12;1457;1458;1459;1609;1610;2509;2510;2832;3037;3038;3064;3416;3417;3418;3419;3452;3453;3454;3537;3538;3862;3863;3875;3876;4379;4380;4456;4457;4714;4764;4803;5703;5704;5810;5811;5812;6023;7273;7274;7934;8306;8413;8414;8592;8593;8645;8646;9149;9150;9240;9241;9641;9642;9643;9719;10465;10466;10487;10645;10978;10979	11;1457;1610;2510;2832;3038;3064;3419;3452;3538;3862;3875;4379;4456;4714;4764;4803;5703;5811;6023;7273;7934;8306;8413;8592;8645;9149;9240;9643;9719;10465;10487;10645;10978
SPBPJ4664.06|gpt1|II|UDP-glucose-glycoprotein	SPBPJ4664.06|gpt1|II|UDP-glucose-glycoprotein	1	1	1	>SPBPJ4664.06|gpt1|II|UDP-glucose-glycoprotein glucosyltransferase Gpt1	1	1	1	1	1	0	1	0	1	0	1	1	1	165.47	1448	1448	0	3.106	By MS/MS	By matching	1	0	0	0	0	0	0	1	0	1				797	2139	TRUE	2188	4500	4268	4268
SPCC1020.06c|tal1|III|transaldolase	SPCC1020.06c|tal1|III|transaldolase	6	6	6	>SPCC1020.06c|tal1|III|transaldolase (predicted)	1	6	6	6	5	6	5	6	5	6	23	23	23	35.238	322	322	0	18.135	By MS/MS	By MS/MS	18	23	87195000	35066000	52128000	38385000	46186000	3	6	9				798	810;2130;2462;2839;3077;5388	True;True;True;True;True;True	839;2178;2524;2914;3157;5561	1718;1719;4483;4484;5164;5919;5920;6389;6390;11687;11688	1628;4252;4253;4902;5632;5633;6076;6077;11133	1628;4253;4902;5633;6077;11133
SPCC1020.10|oca2|III|serine/threonine	SPCC1020.10|oca2|III|serine/threonine	4	4	4	>SPCC1020.10|oca2|III|serine/threonine protein kinase Oca2	1	4	4	4	4	2	4	2	4	2	7.4	7.4	7.4	73.231	650	650	0	14.007	By MS/MS	By MS/MS	7.4	5.2	16913000	8995900	7917400	8320000	8194900	4	3	7				799	2096;4532;4827;4828	True;True;True;True	2142;4678;4986;4987	4399;4400;9856;10496;10497;10498	4176;4177;4178;9357;9957;9958;9959	4176;9357;9957;9959
SPCC1183.01|sec15|III|exocyst	SPCC1183.01|sec15|III|exocyst	5	5	5	>SPCC1183.01|sec15|III|exocyst complex subunit Sec15 (predicted)	1	5	5	5	4	5	4	5	4	5	7.9	7.9	7.9	88.549	768	768	0	15.141	By MS/MS	By MS/MS	6.4	7.9	22874000	12278000	10596000	12321000	10020000	4	4	8				800	193;1130;1824;3227;4238	True;True;True;True;True	201;1162;1867;3308;3309;4373	501;502;2348;2349;3879;3880;6700;6701;9211	466;467;2216;2217;3678;6369;6370;8751	467;2216;3678;6370;8751	166	1
SPCC1183.02|SPCC1183.02|III|glutathione	SPCC1183.02|SPCC1183.02|III|glutathione	2	2	2	>SPCC1183.02|SPCC1183.02|III|glutathione S-transferase, translational elongation factor eEF1 (predicted)	1	2	2	2	1	2	1	2	1	2	10.5	10.5	10.5	25.503	220	220	0	5.0641	By matching	By MS/MS	4.5	10.5	19090000	9999900	9089800	0	8632400	0	2	2				801	1386;2033	True;True	1422;2078	2954;4284;4285	2781;4064	2781;4064
SPCC1183.08c|rpl101|III|60S;SPBC30D10.18c|rpl102|II|60S	SPCC1183.08c|rpl101|III|60S;SPBC30D10.18c|rpl102|II|60S	4;2	4;2	4;2	>SPCC1183.08c|rpl101|III|60S ribosomal protein L10a;>SPBC30D10.18c|rpl102|II|60S ribosomal protein L10a	2	4	4	4	4	3	4	3	4	3	24.1	24.1	24.1	23.917	216	216;216	0	36.546	By MS/MS	By MS/MS	24.1	18.1	39640000	16682000	22958000	16736000	21749000	5	3	8				802	1325;1735;1797;2495	True;True;True;True	1360;1777;1840;2560	2753;2754;3694;3695;3821;3822;5235	2599;2600;3495;3496;3497;3622;3623;4966	2599;3497;3622;4966
SPCC11E10.01|SPCC11E10.01|III|cystathionine	SPCC11E10.01|SPCC11E10.01|III|cystathionine	3	3	3	>SPCC11E10.01|SPCC11E10.01|III|cystathionine beta-lyase (predicted)	1	3	3	3	0	3	0	3	0	3	7.9	7.9	7.9	42.773	390	390	0.0011325	1.4205	By matching	By MS/MS	0	7.9	4901000	0	4901000	0	4654500	0	3	3				803	2268;2885;4146	True;True;True	2323;2961;4279	4774;6018;9039	4530;5723;8591	4530;5723;8591
SPCC1223.01|SPCC1223.01|III|ubiquitin-protein	SPCC1223.01|SPCC1223.01|III|ubiquitin-protein	1	1	1	>SPCC1223.01|SPCC1223.01|III|ubiquitin-protein ligase E3 (predicted)	1	1	1	1	1	1	1	1	1	1	1.8	1.8	1.8	82.699	732	732	0	2.4534	By matching	By MS/MS	1.8	1.8	11643000	4858600	6783900	0	6442600	0	1	1				804	619	TRUE	639	1337;1338	1262	1262
SPCC1223.02|nmt1|III|4-amino-5-hydroxymethyl-2-methylpyrimidine	SPCC1223.02|nmt1|III|4-amino-5-hydroxymethyl-2-methylpyrimidine	12	12	12	>SPCC1223.02|nmt1|III|4-amino-5-hydroxymethyl-2-methylpyrimidine phosphate synthase Nmt1	1	12	12	12	11	12	11	12	11	12	44.5	44.5	44.5	38.965	346	346	0	49.037	By MS/MS	By MS/MS	42.5	44.5	921630000	413700000	507930000	392610000	503470000	9	12	21				805	336;509;896;1128;1226;1519;1750;2078;2236;2298;5126;5412	True;True;True;True;True;True;True;True;True;True;True;True	347;524;925;1160;1259;1555;1793;2123;2289;2353;5293;5585	760;761;1095;1096;1873;1874;1875;1876;2344;2345;2535;2536;3213;3214;3726;3727;3728;3729;4361;4362;4697;4698;4827;4828;11064;11065;11748	718;719;1023;1024;1776;1777;1778;2210;2211;2397;3025;3026;3527;3528;3529;3530;4139;4453;4580;4581;10513;10514;11182	719;1023;1776;2210;2397;3025;3529;4139;4453;4581;10513;11182
SPCC1223.06|tea1|III|cell	SPCC1223.06|tea1|III|cell	7	7	7	>SPCC1223.06|tea1|III|cell end marker Tea1	1	7	7	7	5	6	5	6	5	6	6.8	6.8	6.8	127.43	1147	1147	0	13.888	By MS/MS	By MS/MS	5.3	5.9	47727000	22886000	24841000	21181000	25297000	3	5	8				806	399;1098;1276;1490;2998;3042;3321	True;True;True;True;True;True;True	411;1130;1311;1526;3077;3121;3430	871;872;2287;2659;3154;6231;6232;6319;6320;7210;7211	821;822;2156;2514;2970;5924;6012;6862	821;2156;2514;2970;5924;6012;6862
SPCC1223.07c|drs1|III|cytoplasmic	SPCC1223.07c|drs1|III|cytoplasmic	6	6	6	>SPCC1223.07c|drs1|III|cytoplasmic aspartate-tRNA ligase Drs1 (predicted)	1	6	6	6	5	6	5	6	5	6	11.7	11.7	11.7	66.67	580	580	0	12.273	By MS/MS	By MS/MS	9.5	11.7	68596000	24227000	44369000	32078000	34286000	3	6	9				807	2080;3444;3753;4373;4757;5257	True;True;True;True;True;True	2125;3555;3877;4511;4914;5426	4364;4365;7481;7482;8168;8169;9474;10351;10352;11418;11419	4141;4142;7116;7117;7786;9004;9818;9819;10876	4142;7117;7786;9004;9818;10876
SPCC1223.08c|dfr1|III|dihydrofolate	SPCC1223.08c|dfr1|III|dihydrofolate	13	13	13	>SPCC1223.08c|dfr1|III|dihydrofolate reductase/ serine hydrolase family fusion protein Dfr1	1	13	13	13	11	12	11	12	11	12	30.4	30.4	30.4	51.522	461	461	0	32.268	By MS/MS	By MS/MS	27.8	27.8	469970000	199990000	269980000	200430000	237620000	8	12	20				808	81;589;1233;1411;1425;2187;2199;2506;3116;3517;4423;5191;5192	True;True;True;True;True;True;True;True;True;True;True;True;True	88;608;1267;1447;1461;2237;2238;2251;2572;3196;3632;4564;5359;5360	182;183;1270;1271;2558;2998;2999;3020;3021;4589;4590;4591;4592;4619;4620;5257;6465;6466;7632;7633;9596;9597;9598;11181;11182;11183	177;178;1197;2420;2825;2845;2846;4350;4351;4352;4353;4381;4990;6147;6148;7266;9113;9114;10629;10630;10631	177;1197;2420;2825;2846;4352;4381;4990;6148;7266;9113;10629;10631	167	290
SPCC1223.09|SPCC1223.09|III|uricase	SPCC1223.09|SPCC1223.09|III|uricase	11	11	11	>SPCC1223.09|SPCC1223.09|III|uricase (predicted)	1	11	11	11	11	11	11	11	11	11	44.3	44.3	44.3	33.61	296	296	0	38.841	By MS/MS	By MS/MS	44.3	44.3	427570000	250480000	177090000	238600000	180060000	10	13	23				809	508;1484;1485;1785;1819;2047;2476;3239;3464;3536;4243	True;True;True;True;True;True;True;True;True;True;True	523;1520;1521;1828;1862;2092;2539;3330;3576;3652;4378	1093;1094;3142;3143;3144;3145;3800;3801;3869;3870;4306;4307;5193;5194;6816;6817;6818;6819;7516;7517;7669;7670;9217;9218	1021;1022;2958;2959;2960;2961;3600;3601;3669;4085;4086;4929;6475;6476;6477;6478;6479;7149;7150;7300;7301;8756;8757	1021;2958;2961;3600;3669;4085;4929;6476;7150;7300;8757
SPCC1235.02|bio2|III|biotin	SPCC1235.02|bio2|III|biotin	3	3	3	>SPCC1235.02|bio2|III|biotin synthase	1	3	3	3	3	3	3	3	3	3	8	8	8	40.65	363	363	0	7.745	By MS/MS	By MS/MS	8	8	19282000	11424000	7857300	11209000	7676900	3	2	5				810	1052;2373;3382	True;True;True	1083;2429;3493	2197;2198;4972;4973;7355;7356	2074;4721;4722;6995;6996	2074;4722;6996
SPCC1235.10c|sec6|III|exocyst	SPCC1235.10c|sec6|III|exocyst	1	1	1	>SPCC1235.10c|sec6|III|exocyst complex subunit Sec6	1	1	1	1	1	1	1	1	1	1	2.4	2.4	2.4	85.853	752	752	0	7.1065	By MS/MS	By MS/MS	2.4	2.4	2090700	2090700	0	2090700	0	1	1	2				811	850	TRUE	879	1788;1789	1692;1693	1693
SPCC1235.14|ght5|III|hexose	SPCC1235.14|ght5|III|hexose	2	2	2	>SPCC1235.14|ght5|III|hexose transmembrane transporter Ght5	1	2	2	2	0	2	0	2	0	2	3.8	3.8	3.8	60.32	546	546	0	3.8369	By matching	By MS/MS	0	3.8	2285300	0	2285300	0	2170300	0	2	2				812	5332;5358	True;True	5503;5530	11571;11624	11017;11068	11017;11068
SPCC1259.02c|erm1|III|Endoplasmic	SPCC1259.02c|erm1|III|Endoplasmic	2	2	2	>SPCC1259.02c|erm1|III|Endoplasmic Reticulum metallopeptidase Erm1 (predicted)	1	2	2	2	1	1	1	1	1	1	2.8	2.8	2.8	91.841	822	822	0	4.3098	By MS/MS	By MS/MS	1.5	1.3	0	0	0	0	0	1	1	2				813	1897;4425	True;True	1940;4566	4024;9601	3816;9116	3816;9116
SPCC126.09|zip2|III|vacuolar	SPCC126.09|zip2|III|vacuolar	2	2	2	>SPCC126.09|zip2|III|vacuolar membrane zinc transmembrane transporter (predicted)	1	2	2	2	2	2	2	2	2	2	5.1	5.1	5.1	42.876	389	389	0	2.9917	By MS/MS	By MS/MS	5.1	5.1	10708000	7045100	3663300	6212700	4311400	2	1	3				814	1887;4836	True;True	1930;4995	4008;4009;10511;10512	3798;3799;9971	3799;9971
SPCC1281.01|ags1|III|alpha	SPCC1281.01|ags1|III|alpha	2	2	2	>SPCC1281.01|ags1|III|alpha glucan synthase Ags1	1	2	2	2	2	1	2	1	2	1	1	1	1	272.12	2410	2410	0	2.9598	By MS/MS	By MS/MS	1	0.4	5389300	2903800	2485500	0	2360500	1	0	1				815	4510;4732	True;True	4655;4889	9802;9803;10307	9308;9777	9308;9777
SPCC1281.06c|ole1|III|acyl-coA	SPCC1281.06c|ole1|III|acyl-coA	13	13	13	>SPCC1281.06c|ole1|III|acyl-coA desaturase (predicted)	1	13	13	13	11	12	11	12	11	12	41.3	41.3	41.3	54.438	479	479	0	75.598	By MS/MS	By MS/MS	38.6	37.2	522680000	251190000	271490000	220700000	209670000	11	13	24				816	563;1522;1826;2457;2958;3365;3923;4351;4451;4452;4783;5187;5400	True;True;True;True;True;True;True;True;True;True;True;True;True	580;1558;1869;2519;3037;3476;4053;4054;4489;4593;4594;4940;5355;5573	1212;1213;3219;3220;3883;3884;5155;6163;6164;7310;7311;8585;8586;8587;8588;9428;9429;9430;9671;9672;9673;10404;10405;11173;11174;11726	1141;3030;3681;3682;4892;5861;5862;5863;6954;6955;8165;8166;8167;8168;8958;8959;8960;9178;9179;9180;9865;10621;10622;11164	1141;3030;3681;4892;5863;6955;8166;8960;9179;9180;9865;10622;11164	168	199
SPCC132.04c|gdh2|III|NAD-dependent	SPCC132.04c|gdh2|III|NAD-dependent	33	33	33	>SPCC132.04c|gdh2|III|NAD-dependent glutamate dehydrogenase Gdh2 (predicted)	1	33	33	33	25	33	25	33	25	33	38.3	38.3	38.3	125.71	1106	1106	0	136.86	By MS/MS	By MS/MS	30.7	38.3	887090000	232580000	654510000	286410000	567740000	21	39	60				817	167;202;401;505;530;562;755;843;871;1311;1428;1529;1665;1922;2222;2588;2710;3057;3080;3189;3297;3888;4528;4586;4646;4747;4971;4972;4999;5289;5291;5341;5433	True;True;True;True;True;True;True;True;True;True;True;True;True;True;True;True;True;True;True;True;True;True;True;True;True;True;True;True;True;True;True;True;True	175;210;413;520;546;579;780;872;900;1346;1464;1565;1705;1966;2274;2658;2784;3137;3160;3269;3406;4016;4674;4735;4797;4904;5134;5135;5162;5459;5461;5512;5606	451;452;516;517;875;1088;1143;1210;1211;1610;1776;1777;1778;1824;1825;2729;2730;3026;3027;3236;3237;3548;3549;4073;4074;4666;4667;5433;5434;5674;5675;6347;6348;6349;6394;6395;6627;6628;6978;6979;6980;8513;8514;9849;9850;9967;9968;10095;10096;10330;10762;10763;10814;10815;11485;11486;11488;11489;11589;11590;11789	417;418;479;480;824;1016;1075;1139;1140;1523;1524;1680;1681;1726;1727;2577;2578;2851;2852;2853;3047;3346;3347;3864;4423;4424;4425;5162;5163;5393;5394;6036;6037;6038;6081;6082;6300;6301;6639;6640;8100;8101;9351;9352;9459;9460;9579;9580;9797;9798;10223;10224;10273;10274;10941;10942;10944;10945;11035;11220	417;480;824;1016;1075;1139;1524;1681;1727;2577;2852;3047;3347;3864;4423;5163;5394;6037;6081;6300;6639;8101;9352;9460;9580;9797;10223;10224;10273;10942;10945;11035;11220
SPCC1322.04|fyu1|III|UTP-glucose-1-phosphate	SPCC1322.04|fyu1|III|UTP-glucose-1-phosphate	9	9	9	>SPCC1322.04|fyu1|III|UTP-glucose-1-phosphate uridylyltransferase Fyu1	1	9	9	9	8	9	8	9	8	9	29.6	29.6	29.6	56.429	506	506	0	25.309	By MS/MS	By MS/MS	25.7	29.6	233320000	98015000	135300000	102000000	124510000	7	9	16				818	610;1010;1082;1834;1985;2825;3329;4651;5250	True;True;True;True;True;True;True;True;True	629;1041;1114;1877;2030;2899;3438;4802;5419	1318;1319;2118;2119;2256;2257;3900;4196;4197;5896;5897;7229;7230;7231;7232;10103;10104;11404;11405	1242;1243;2004;2005;2127;3697;3981;3982;5612;5613;6879;6880;6881;6882;9587;10864	1243;2004;2127;3697;3981;5612;6879;9587;10864
SPCC1322.05c|lap2|III|vacuolar	SPCC1322.05c|lap2|III|vacuolar	1	1	1	>SPCC1322.05c|lap2|III|vacuolar aminopeptidase	1	1	1	1	1	1	1	1	1	1	1.5	1.5	1.5	69.521	612	612	0.008658	1.1086	By matching	By MS/MS	1.5	1.5	2992900	1107500	1885500	0	1790600	0	1	1				819	101	TRUE	108	338;339	314	314
SPCC1322.06|kap113|III|karyopherin	SPCC1322.06|kap113|III|karyopherin	1	1	1	>SPCC1322.06|kap113|III|karyopherin Kap113	1	1	1	1	1	0	1	0	1	0	1.3	1.3	1.3	112.93	983	983	0	4.2502	By MS/MS	By matching	1.3	0	0	0	0	0	0	1	0	1				820	4580	TRUE	4728	9954	9445	9445
SPCC1322.08|srk1|III|MAPK-activated	SPCC1322.08|srk1|III|MAPK-activated	1	1	1	>SPCC1322.08|srk1|III|MAPK-activated protein kinase Srk1	1	1	1	1	1	0	1	0	1	0	2.4	2.4	2.4	66.135	580	580	0	2.1605	By MS/MS	By matching	2.4	0	1324500	1324500	0	1324500	0	1	0	1				821	680	TRUE	701	1452	1374	1374
SPCC1322.13|ade6|III|phosphoribosylaminoimidazole	SPCC1322.13|ade6|III|phosphoribosylaminoimidazole	3	3	3	>SPCC1322.13|ade6|III|phosphoribosylaminoimidazole carboxylase Ade6	1	3	3	3	3	3	3	3	3	3	7.6	7.6	7.6	60.013	552	552	0	10.758	By MS/MS	By MS/MS	7.6	7.6	12810000	4608900	8201000	4651400	7745800	2	3	5				822	162;916;4271	True;True;True	170;945;4407	442;443;1918;1919;9276;9277	409;410;1817;8808;8809	409;1817;8809
SPCC1322.14c|vtc4|III|vacuolar	SPCC1322.14c|vtc4|III|vacuolar	15	15	15	>SPCC1322.14c|vtc4|III|vacuolar transporter chaperone (VTC) complex subunit (predicted)	1	15	15	15	12	14	12	14	12	14	22.6	22.6	22.6	83.634	721	721	0	37.202	By MS/MS	By MS/MS	18.7	21.1	97859000	51136000	46723000	44193000	51315000	12	11	23				823	748;1049;1251;1328;1349;1669;1889;2272;2451;4338;4531;4639;5188;5417;5426	True;True;True;True;True;True;True;True;True;True;True;True;True;True;True	772;1080;1286;1363;1385;1710;1932;2327;2513;4475;4677;4790;5356;5590;5599	1595;1596;2193;2615;2616;2759;2760;2803;3559;3560;4011;4012;4782;5141;5142;9408;9409;9855;10080;10081;11175;11176;11755;11756;11771;11772	1507;1508;2070;2475;2476;2605;2606;2647;3358;3359;3801;3802;4537;4879;8938;8939;9356;9565;9566;10623;10624;11188;11189;11204	1508;2070;2475;2605;2647;3358;3801;4537;4879;8938;9356;9565;10624;11188;11204
SPCC1393.03|rps1501|III|40S;SPAC1071.07c|rps1502|I|40S	SPCC1393.03|rps1501|III|40S;SPAC1071.07c|rps1502|I|40S	2;1	2;1	2;1	>SPCC1393.03|rps1501|III|40S ribosomal protein S15 (predicted);>SPAC1071.07c|rps1502|I|40S ribosomal protein S15 (predicted)	2	2	2	2	2	2	2	2	2	2	22.9	22.9	22.9	17.519	153	153;154	0	25.434	By MS/MS	By MS/MS	22.9	22.9	36700000	25872000	10828000	21431000	14724000	2	2	4				824	1704;4389	True;True	1746;4527	3629;3630;9506;9507	3427;3428;9034;9035	3427;9034
SPCC13B11.01|adh1|III|alcohol	SPCC13B11.01|adh1|III|alcohol	18	18	18	>SPCC13B11.01|adh1|III|alcohol dehydrogenase Adh1	1	18	18	18	14	18	14	18	14	18	69.7	69.7	69.7	37.396	350	350	0	81.305	By MS/MS	By MS/MS	59.1	69.7	2440600000	955820000	1484800000	926600000	1348400000	16	25	41				825	34;813;1188;1616;1998;2332;2681;3273;3599;3702;3950;4313;4450;4794;4996;5062;5158;5403	True;True;True;True;True;True;True;True;True;True;True;True;True;True;True;True;True;True	35;842;1220;1654;2043;2388;2755;3375;3376;3718;3824;4082;4450;4592;4952;5159;5227;5325;5576	68;69;1723;2458;2459;2460;2461;3450;3451;4217;4218;4219;4896;5610;6918;6919;6920;6921;6922;7835;7836;8049;8050;8051;8052;8053;8054;8643;8644;9362;9669;9670;10426;10427;10809;10810;10930;10931;10932;10933;11125;11126;11730;11731;11732;11733	67;1632;2323;2324;2325;2326;3252;3253;4000;4001;4002;4640;5335;6575;6576;6577;6578;6579;7459;7460;7662;7663;7664;7665;7666;7667;8217;8893;9176;9177;9883;9884;9885;10270;10381;10382;10383;10576;10577;11168;11169	67;1632;2324;3253;4001;4640;5335;6575;7460;7662;8217;8893;9177;9884;10270;10382;10577;11168	169	63
SPCC1442.09|trp3|III|anthranilate	SPCC1442.09|trp3|III|anthranilate	1	1	1	>SPCC1442.09|trp3|III|anthranilate synthase component I (predicted)	1	1	1	1	1	1	1	1	1	1	2	2	2	54.959	489	489	0	4.1199	By matching	By MS/MS	2	2	3373000	1147600	2225500	0	2113500	0	1	1				826	222	TRUE	231	551;552	516	516
SPCC1442.12|pps1|III|phosphatidylserine	SPCC1442.12|pps1|III|phosphatidylserine	1	1	1	>SPCC1442.12|pps1|III|phosphatidylserine synthase Pps1	1	1	1	1	1	0	1	0	1	0	4.2	4.2	4.2	26.525	240	240	0.0065502	1.1538	By MS/MS	By matching	4.2	0	3479700	3479700	0	3479700	0	1	0	1				827	1312	TRUE	1347	2731	2579	2579
SPCC1442.14c|hnt1|III|adenosine	SPCC1442.14c|hnt1|III|adenosine	2	2	2	>SPCC1442.14c|hnt1|III|adenosine 5-monophosphoramidase (predicted)	1	2	2	2	2	2	2	2	2	2	17.3	17.3	17.3	14.58	133	133	0	4.6259	By MS/MS	By MS/MS	17.3	17.3	13440000	7247900	6192300	7247900	0	4	2	6				828	205;1523	True;True	213;1559	522;523;3221;3222	485;486;487;488;3031;3032	486;3032
SPCC1450.04|tef5|III|translation	SPCC1450.04|tef5|III|translation	2	2	2	>SPCC1450.04|tef5|III|translation elongation factor EF-1 beta subunit, guanyl-nucleotide exchange factor (eEF1B)	1	2	2	2	2	2	2	2	2	2	9.8	9.8	9.8	23.484	214	214	0	7.6286	By MS/MS	By MS/MS	9.8	9.8	18934000	8706200	10227000	8713200	9705800	3	2	5				829	1499;3723	True;True	1535;3846	3170;3171;8094;8095	2983;2984;7705;7706;7707	2984;7707
SPCC1494.05c|ubp12|III|CSN-associated	SPCC1494.05c|ubp12|III|CSN-associated	1	1	1	>SPCC1494.05c|ubp12|III|CSN-associated deubiquitinating enzyme Ubp12	1	1	1	1	0	1	0	1	0	1	0.8	0.8	0.8	111.97	979	979	0	2.4412	By matching	By MS/MS	0	0.8	1697700	0	1697700	0	1612300	0	1	1				830	794	TRUE	821	1686	1595	1595
SPCC1494.06c|dbp9|III|ATP-dependent	SPCC1494.06c|dbp9|III|ATP-dependent	1	1	1	>SPCC1494.06c|dbp9|III|ATP-dependent RNA helicase Dbp9 (predicted)	1	1	1	1	1	0	1	0	1	0	1.8	1.8	1.8	67.45	595	595	0	3.6495	By MS/MS	By matching	1.8	0	2180300	2180300	0	2180300	0	1	0	1				831	1547	TRUE	1584	3316	3118	3118
SPCC162.02c|SPCC162.02c|III|AMP-binding	SPCC162.02c|SPCC162.02c|III|AMP-binding	11	11	11	>SPCC162.02c|SPCC162.02c|III|AMP-binding dehydrogenase (predicted)	1	11	11	11	11	9	11	9	11	9	13.4	13.4	13.4	109.85	981	981	0	25.318	By MS/MS	By MS/MS	13.4	10.3	77236000	40059000	37178000	37918000	37448000	12	9	21				832	152;542;1006;1202;1281;2585;2915;2932;3360;3400;3523	True;True;True;True;True;True;True;True;True;True;True	160;558;1037;1235;1316;2655;2993;3010;3471;3511;3638	425;426;1171;1172;2106;2107;2489;2669;2670;5427;5428;6073;6106;6107;7299;7300;7388;7389;7644;7645	393;394;1099;1100;1993;1994;2355;2524;2525;5156;5157;5158;5777;5807;5808;6942;6943;7025;7026;7277;7278	393;1099;1994;2355;2524;5158;5777;5807;6942;7025;7278
[truncated: 120 more rows]

## Sheet: E160419_LFQ_summary
Accession No	Peptide count, strain KS7611	Peptide count, strain KS8573	Mol. weight [kDa]	Score	LFQ intensity, strain KS7611	LFQ intensity, strain KS8573	LFQ intensity sum (KS7611+KS8573)	LFQ ratio (KS7611/KS8573)	Protein Name
[truncated: 913 more rows]

[truncated: 2 more sheets: E161127_all, E161127_LFQ_summary]
