# Supplementary material for: Exportin Crm1 is repurposed as a docking protein to generate microtubule organizing centers at the nuclear pore
Source: eLife. 2018 May 29;7:e33465. doi: 10.7554/eLife.33465 (PMC6008054; doi:10.7554/eLife.33465)
Supplement: Supplementary file 6. [file elife-33465-supp6.xlsx]

## Sheet: E170214_all
Protein IDs	Majority protein IDs	Peptide counts (all)	Peptide counts (razor+unique)	Peptide counts (unique)	Fasta headers	Number of proteins	Peptides	Razor + unique peptides	Unique peptides	Peptides KS9021_PMG	Peptides KS9021_LowN	Peptides KS9077_PMG	Peptides KS9077_LowN	Razor + unique peptides KS9021_PMG	Razor + unique peptides KS9021_LowN	Razor + unique peptides KS9077_PMG	Razor + unique peptides KS9077_LowN	Unique peptides KS9021_PMG	Unique peptides KS9021_LowN	Unique peptides KS9077_PMG	Unique peptides KS9077_LowN	Sequence coverage [%]	Unique + razor sequence coverage [%]	Unique sequence coverage [%]	Mol. weight [kDa]	Sequence length	Sequence lengths	Q-value	Score	Identification type KS9021_PMG	Identification type KS9021_LowN	Identification type KS9077_PMG	Identification type KS9077_LowN	Sequence coverage KS9021_PMG [%]	Sequence coverage KS9021_LowN [%]	Sequence coverage KS9077_PMG [%]	Sequence coverage KS9077_LowN [%]	Intensity	Intensity KS9021_PMG	Intensity KS9021_LowN	Intensity KS9077_PMG	Intensity KS9077_LowN	LFQ intensity KS9021_PMG	LFQ intensity KS9021_LowN	LFQ intensity KS9077_PMG	LFQ intensity KS9077_LowN	MS/MS Count KS9021_PMG	MS/MS Count KS9021_LowN	MS/MS Count KS9077_PMG
SPAC1002.03c|gls2|I|glucosidase	SPAC1002.03c|gls2|I|glucosidase	7	7	7	>SPAC1002.03c|gls2|I|glucosidase II alpha subunit Gls2	1	7	7	7	4	4	4	2	4	4	4	2	4	4	4	2	9.1	9.1	9.1	106.28	923	923	0	22.814	By MS/MS	By MS/MS	By MS/MS	By MS/MS	5.2	5.1	5.1	2.9	38500000	6298400	13235000	15214000	3752800	10213000	6596900	0	0	4	3	4
SPAC1002.09c|dld1|I|dihydrolipoamide	SPAC1002.09c|dld1|I|dihydrolipoamide	8	8	8	>SPAC1002.09c|dld1|I|dihydrolipoamide dehydrogenase Dld1	1	8	8	8	5	8	6	5	5	8	6	5	5	8	6	5	22.3	22.3	22.3	54.731	511	511	0	29.199	By MS/MS	By MS/MS	By MS/MS	By MS/MS	13.9	22.3	16.6	14.7	161270000	37680000	57569000	39406000	26615000	29354000	42508000	27543000	39816000	3	8	1
SPAC1002.12c|SPAC1002.12c|I|succinate-semialdehyde	SPAC1002.12c|SPAC1002.12c|I|succinate-semialdehyde	1	1	1	>SPAC1002.12c|SPAC1002.12c|I|succinate-semialdehyde dehydrogenase [NAD(P)+] (predicted)	1	1	1	1	0	1	1	0	0	1	1	0	0	1	1	0	2.4	2.4	2.4	58.833	547	547	0	3.5216	By matching	By MS/MS	By MS/MS	By matching	0	2.4	2.4	0	2938400	0	0	2938400	0	0	0	2434000	0	0	1	1
SPAC1002.17c|urg2|I|uracil	SPAC1002.17c|urg2|I|uracil	9	9	9	>SPAC1002.17c|urg2|I|uracil phosphoribosyltransferase (predicted)	1	9	9	9	7	0	8	0	7	0	8	0	7	0	8	0	52.5	52.5	52.5	22.083	204	204	0	64.688	By MS/MS	By matching	By MS/MS	By matching	39.7	0	48.5	0	169580000	86636000	0	82945000	0	65421000	0	75222000	0	5	0	6
SPAC1002.18|urg3|I|DUF1688	SPAC1002.18|urg3|I|DUF1688	6	6	6	>SPAC1002.18|urg3|I|DUF1688 family protein	1	6	6	6	6	0	4	0	6	0	4	0	6	0	4	0	17	17	17	44.21	399	399	0	13.934	By MS/MS	By matching	By MS/MS	By matching	17	0	12.5	0	31945000	17631000	0	14314000	0	14284000	0	11561000	0	5	0	2
SPAC1002.19|urg1|I|GTP	SPAC1002.19|urg1|I|GTP	21	21	21	>SPAC1002.19|urg1|I|GTP cyclohydrolase II Urg1 (predicted)	1	21	21	21	20	0	20	0	20	0	20	0	20	0	20	0	59	59	59	49.034	439	439	0	115.7	By MS/MS	By matching	By MS/MS	By matching	56	0	57.4	0	837870000	408230000	0	429640000	0	297550000	0	358520000	0	27	0	21
SPAC1006.07|SPAC1006.07|I|translation	SPAC1006.07|SPAC1006.07|I|translation	13	13	12	>SPAC1006.07|SPAC1006.07|I|translation initiation factor eIF4A (predicted)	1	13	13	12	11	11	8	10	11	11	8	10	10	10	8	9	41.6	41.6	36.7	44.436	392	392	0	108.3	By MS/MS	By MS/MS	By MS/MS	By MS/MS	33.4	31.6	21.4	37	426680000	120880000	119540000	79167000	107090000	84721000	100110000	89855000	102950000	9	11	8
SPAC1006.09|win1|I|MAP	SPAC1006.09|win1|I|MAP	13	13	13	>SPAC1006.09|win1|I|MAP kinase kinase kinase Win1	1	13	13	13	10	8	10	8	10	8	10	8	10	8	10	8	13.4	13.4	13.4	163.27	1436	1436	0	48.371	By MS/MS	By MS/MS	By MS/MS	By MS/MS	9.5	8.8	10.4	8.6	190300000	53473000	42582000	45636000	48607000	42371000	42870000	35205000	47622000	9	8	9
SPAC105.03c|SPAC105.03c|I|transcription	SPAC105.03c|SPAC105.03c|I|transcription	2	2	2	>SPAC105.03c|SPAC105.03c|I|transcription factor (predicted)	1	2	2	2	0	2	1	2	0	2	1	2	0	2	1	2	2.4	2.4	2.4	80.989	708	708	0	3.9787	By matching	By MS/MS	By matching	By MS/MS	0	2.4	1	2.4	10023000	0	4599000	1700300	3724200	0	3971000	0	3777400	0	2	0
SPAC1071.02|mms19|I|Dos2	SPAC1071.02|mms19|I|Dos2	2	2	2	>SPAC1071.02|mms19|I|Dos2 silencing complex subunit Mms19	1	2	2	2	0	2	0	1	0	2	0	1	0	2	0	1	2.6	2.6	2.6	114.67	1018	1018	0	3.3218	By matching	By MS/MS	By matching	By matching	0	2.6	0	1.4	6219500	0	4481600	0	1737900	0	3921500	0	0	0	2	0
SPAC1071.10c|pma1|I|P-type;SPCC1020.01c|pma2|III|P-type	SPAC1071.10c|pma1|I|P-type	31;6	31;6	31;6	>SPAC1071.10c|pma1|I|P-type proton ATPase, P3-type Pma1	2	31	31	31	27	24	28	25	27	24	28	25	27	24	28	25	41	41	41	99.883	919	919;1010	0	323.31	By MS/MS	By MS/MS	By MS/MS	By MS/MS	36.2	32	33.7	34.4	6512700000	1725500000	1574100000	1907800000	1305300000	1293500000	1310400000	1487200000	1320900000	39	41	51
SPAC1093.01|ppr5|I|mitochondrial	SPAC1093.01|ppr5|I|mitochondrial	3	3	3	>SPAC1093.01|ppr5|I|mitochondrial PPR repeat protein Ppr5	1	3	3	3	0	0	0	3	0	0	0	3	0	0	0	3	2.6	2.6	2.6	141.95	1261	1261	0	7.9762	By matching	By matching	By matching	By MS/MS	0	0	0	2.6	2464400	0	0	0	2464400	0	0	0	2464400	0	0	0
SPAC10F6.01c|sir1|I|sulfite	SPAC10F6.01c|sir1|I|sulfite	38	38	38	>SPAC10F6.01c|sir1|I|sulfite reductase beta subunit Sir1	1	38	38	38	30	33	28	29	30	33	28	29	30	33	28	29	36.9	36.9	36.9	163.84	1473	1473	0	257.24	By MS/MS	By MS/MS	By MS/MS	By MS/MS	29.1	32.2	26.8	29.3	1030600000	243190000	302670000	211960000	272760000	191190000	247400000	197290000	275480000	28	28	24
SPAC10F6.03c|cts1|I|CTP	SPAC10F6.03c|cts1|I|CTP	11	11	11	>SPAC10F6.03c|cts1|I|CTP synthase Cts1 (predicted)	1	11	11	11	10	9	9	10	10	9	9	10	10	9	9	10	26.3	26.3	26.3	66.867	600	600	0	53.399	By MS/MS	By MS/MS	By MS/MS	By MS/MS	24.5	22.2	22.5	24.3	325100000	92249000	86706000	75276000	70874000	62172000	81229000	56195000	78200000	7	8	5
SPAC10F6.06|vip1|I|RNA-binding	SPAC10F6.06|vip1|I|RNA-binding	5	5	5	>SPAC10F6.06|vip1|I|RNA-binding protein Vip1	1	5	5	5	4	5	4	5	4	5	4	5	4	5	4	5	25.7	25.7	25.7	27.459	257	257	0	20.646	By MS/MS	By MS/MS	By MS/MS	By MS/MS	21.4	25.7	17.9	25.7	94672000	27689000	21416000	21534000	24033000	23595000	16652000	20573000	22781000	2	3	2
SPAC10F6.13c|caa1|I|cytoplasmic	SPAC10F6.13c|caa1|I|cytoplasmic	7	7	7	>SPAC10F6.13c|caa1|I|cytoplasmic aspartate aminotransferase Caa1 (predicted)	1	7	7	7	4	5	4	6	4	5	4	6	4	5	4	6	26.9	26.9	26.9	46.14	409	409	0	46.468	By MS/MS	By MS/MS	By MS/MS	By MS/MS	14.2	19.8	12.7	24	142040000	29042000	44691000	21208000	47103000	25621000	38326000	31270000	32674000	1	5	3
SPAC110.02|pds5|I|mitotic	SPAC110.02|pds5|I|mitotic	2	2	2	>SPAC110.02|pds5|I|mitotic and meiotic cohesin-associated protein Pds5	1	2	2	2	1	1	2	2	1	1	2	2	1	1	2	2	2.4	2.4	2.4	138.87	1205	1205	0.0016077	2.7873	By MS/MS	By matching	By MS/MS	By matching	1.4	1.4	2.4	2.4	207960000	31485000	23077000	131090000	22305000	0	0	0	22305000	1	0	1
SPAC110.03|cdc42|I|Rho	SPAC110.03|cdc42|I|Rho	3	3	3	>SPAC110.03|cdc42|I|Rho family GTPase Cdc42	1	3	3	3	3	3	3	2	3	3	3	2	3	3	3	2	15.1	15.1	15.1	21.329	192	192	0	11.476	By MS/MS	By MS/MS	By MS/MS	By MS/MS	15.1	15.1	15.1	9.9	105410000	26784000	32232000	22279000	24111000	21474000	18790000	24750000	27691000	4	4	2
SPAC110.04c|pss1|I|heat	SPAC110.04c|pss1|I|heat	29	29	29	>SPAC110.04c|pss1|I|heat shock protein Pss1	1	29	29	29	26	23	23	21	26	23	23	21	26	23	23	21	46.2	46.2	46.2	80.374	720	720	0	168.4	By MS/MS	By MS/MS	By MS/MS	By MS/MS	39.3	37.2	37.4	34.9	1263500000	358760000	304160000	308150000	292430000	288150000	261490000	267440000	279720000	26	23	23
SPAC1142.06|get3|I|GET	SPAC1142.06|get3|I|GET	4	4	4	>SPAC1142.06|get3|I|GET complex ATPase subunit Get3 (predicted)	1	4	4	4	3	2	3	1	3	2	3	1	3	2	3	1	17	17	17	36.548	329	329	0	10.354	By MS/MS	By MS/MS	By MS/MS	By MS/MS	10.6	7.9	12.2	3	46621000	11139000	10197000	17608000	7675900	8138200	10034000	0	0	2	2	2
SPAC11D3.02c|SPAC11D3.02c|I|ELLA	SPAC11D3.02c|SPAC11D3.02c|I|ELLA	1	1	1	>SPAC11D3.02c|SPAC11D3.02c|I|ELLA family acetyltransferase (predicted)	1	1	1	1	0	1	0	0	0	1	0	0	0	1	0	0	6	6	6	17.414	150	150	0.0090909	2.1719	By matching	By MS/MS	By matching	By matching	0	6	0	0	2157800	0	2157800	0	0	0	1888100	0	0	0	1	0
SPAC11D3.15|SPAC11D3.15|I|5-oxoprolinase	SPAC11D3.15|SPAC11D3.15|I|5-oxoprolinase	8	8	8	>SPAC11D3.15|SPAC11D3.15|I|5-oxoprolinase (ATP-hydrolizing) (predicted)	1	8	8	8	5	6	4	6	5	6	4	6	5	6	4	6	7.5	7.5	7.5	143.72	1317	1317	0	22.503	By MS/MS	By MS/MS	By MS/MS	By MS/MS	4.6	5.5	3.7	5.7	54247000	10414000	17527000	10011000	16294000	11798000	10099000	10850000	15823000	3	6	2
SPAC11E3.01c|swr1|I|SNF2	SPAC11E3.01c|swr1|I|SNF2	2	2	2	>SPAC11E3.01c|swr1|I|SNF2 family ATP-dependent DNA helicase Swr1	1	2	2	2	1	1	2	0	1	1	2	0	1	1	2	0	1.5	1.5	1.5	149.45	1288	1288	0	3.9084	By MS/MS	By MS/MS	By MS/MS	By matching	0.5	0.5	1.5	0	36908000	18711000	7110100	11087000	0	0	0	9183700	0	1	1	2
SPAC11E3.07|vma4|I|V-type	SPAC11E3.07|vma4|I|V-type	2	2	2	>SPAC11E3.07|vma4|I|V-type ATPase V1 subunit E (predicted)	1	2	2	2	1	1	2	0	1	1	2	0	1	1	2	0	7.9	7.9	7.9	25.741	227	227	0.008365	2.2111	By matching	By MS/MS	By MS/MS	By matching	4	4	7.9	0	10799000	934730	3174300	6690300	0	0	0	5541800	0	0	0	1
SPAC11E3.14|SPAC11E3.14|I|conserved	SPAC11E3.14|SPAC11E3.14|I|conserved	3	3	3	>SPAC11E3.14|SPAC11E3.14|I|conserved eukaryotic protein	1	3	3	3	2	3	2	2	2	3	2	2	2	3	2	2	6.5	6.5	6.5	67.09	588	588	0	9.6954	By MS/MS	By MS/MS	By MS/MS	By MS/MS	4.6	6.5	4.6	4.6	44544000	10605000	12769000	15045000	6124400	8832100	11695000	11843000	6195800	2	3	2
SPAC11E3.15|rpl22|I|60S	SPAC11E3.15|rpl22|I|60S	1	1	1	>SPAC11E3.15|rpl22|I|60S ribosomal protein L22 (predicted)	1	1	1	1	1	0	0	1	1	0	0	1	1	0	0	1	10.3	10.3	10.3	13.32	117	117	0.00082102	2.997	By MS/MS	By matching	By matching	By MS/MS	10.3	0	0	10.3	0	0	0	0	0	0	0	0	0	1	0	0
SPAC11G7.03|idh1|I|isocitrate	SPAC11G7.03|idh1|I|isocitrate	7	7	7	>SPAC11G7.03|idh1|I|isocitrate dehydrogenase (NAD+) subunit 1 Idh1	1	7	7	7	6	6	5	5	6	6	5	5	6	6	5	5	27.2	27.2	27.2	38.758	356	356	0	31.085	By MS/MS	By MS/MS	By MS/MS	By MS/MS	23.9	24.7	21.3	20.8	109310000	35905000	25958000	25563000	21883000	23990000	23858000	21942000	24051000	5	6	4
SPAC1805.12c|uep1|I|ribosomal-ubiquitin;SPAC11G7.04|ubi1|I|ribosomal-ubiquitin;SPAC6G10.11c|ubi3|I|ribosomal-ubiquitin;SPAC589.10c|ubi5|I|ribosomal-ubiquitin;SPBC337.08c|ubi4|II|ubiquitin	SPAC1805.12c|uep1|I|ribosomal-ubiquitin;SPAC11G7.04|ubi1|I|ribosomal-ubiquitin;SPAC6G10.11c|ubi3|I|ribosomal-ubiquitin;SPAC589.10c|ubi5|I|ribosomal-ubiquitin;SPBC337.08c|ubi4|II|ubiquitin	3;3;3;3;3	3;3;3;3;3	3;3;3;3;3	>SPAC1805.12c|uep1|I|ribosomal-ubiquitin fusion protein Ubi2;>SPAC11G7.04|ubi1|I|ribosomal-ubiquitin fusion protein Ubi1 (predicted);>SPAC6G10.11c|ubi3|I|ribosomal-ubiquitin fusion protein Ubi3 (predicted);>SPAC589.10c|ubi5|I|ribosomal-ubiquitin fusion pro	5	3	3	3	3	3	3	2	3	3	3	2	3	3	3	2	26.6	26.6	26.6	14.595	128	128;128;150;150;382	0	47.867	By MS/MS	By MS/MS	By MS/MS	By MS/MS	26.6	26.6	26.6	14.1	576220000	171680000	107670000	206690000	90179000	141200000	84801000	155070000	117080000	5	2	3
SPAC11H11.06|arp2|I|ARP2/3	SPAC11H11.06|arp2|I|ARP2/3	4	4	4	>SPAC11H11.06|arp2|I|ARP2/3 actin-organizing complex subunit Arp2	1	4	4	4	2	2	4	2	2	2	4	2	2	2	4	2	12.3	12.3	12.3	44.23	390	390	0	13.184	By MS/MS	By MS/MS	By MS/MS	By MS/MS	5.4	5.4	12.3	5.4	42510000	9401600	6400800	19258000	7449700	9415200	0	12809000	8983700	2	2	4
SPAC12B10.02c|SPAC12B10.02c|I|endoplasmic	SPAC12B10.02c|SPAC12B10.02c|I|endoplasmic	1	1	1	>SPAC12B10.02c|SPAC12B10.02c|I|endoplasmic reticulum resident protein required for packaging into COPII vesicles (predicted)	1	1	1	1	0	0	1	1	0	0	1	1	0	0	1	1	4.7	4.7	4.7	26.934	235	235	0.0039277	2.4768	By matching	By matching	By matching	By MS/MS	0	0	4.7	4.7	6661100	0	0	3395200	3265900	0	0	0	3265900	0	0	0
SPAC12B10.03|bun62|I|WD	SPAC12B10.03|bun62|I|WD	3	3	3	>SPAC12B10.03|bun62|I|WD repeat protein, human WDR20 family, Bun62	1	3	3	3	1	1	2	2	1	1	2	2	1	1	2	2	6.4	6.4	6.4	61.81	543	543	0	8.0145	By matching	By matching	By MS/MS	By MS/MS	3.3	1.5	5	4.8	11829000	1691300	2286100	2827100	5024300	0	0	0	5024300	0	0	1
SPAC12G12.04|mcp60|I|mitochondrial	SPAC12G12.04|mcp60|I|mitochondrial	25	25	25	>SPAC12G12.04|mcp60|I|mitochondrial heat shock protein Hsp60/Mcp60	1	25	25	25	24	21	23	19	24	21	23	19	24	21	23	19	44.5	44.5	44.5	62.167	582	582	0	239.34	By MS/MS	By MS/MS	By MS/MS	By MS/MS	42.4	36.9	44	34.7	1584100000	463770000	372960000	426960000	320430000	356550000	351000000	302350000	374030000	27	20	23
SPAC12G12.14c|pfs2|I|WD	SPAC12G12.14c|pfs2|I|WD	2	2	2	>SPAC12G12.14c|pfs2|I|WD repeat protein Pfs2	1	2	2	2	0	1	1	1	0	1	1	1	0	1	1	1	4.3	4.3	4.3	57.654	509	509	0	5.394	By matching	By MS/MS	By MS/MS	By matching	0	2	2.4	2	6258100	0	3857300	0	2400900	0	0	0	2400900	0	1	1
SPAC1327.01c|SPAC1327.01c|I|transcription	SPAC1327.01c|SPAC1327.01c|I|transcription	2	2	2	>SPAC1327.01c|SPAC1327.01c|I|transcription factor, zf-fungal binuclear cluster type (predicted)	1	2	2	2	2	0	1	0	2	0	1	0	2	0	1	0	1.9	1.9	1.9	107.81	977	977	0	4.9093	By MS/MS	By matching	By MS/MS	By matching	1.9	0	1.2	0	9362300	5186200	0	4176100	0	4306300	0	0	0	1	0	1
SPAC139.01c|ath2|I|Ath1	SPAC139.01c|ath2|I|Ath1	2	2	2	>SPAC139.01c|ath2|I|Ath1 complex protein Ath2 nuclease, XP-G family (predicted)	1	2	2	2	1	1	2	1	1	1	2	1	1	1	2	1	2.5	2.5	2.5	90.152	802	802	0	3.5786	By MS/MS	By MS/MS	By MS/MS	By MS/MS	1.1	1.1	2.5	1.1	6339600	1325400	1756100	1860700	1397500	0	0	0	1397500	1	1	2
SPAC139.02c|oac1|I|mitochondrial	SPAC139.02c|oac1|I|mitochondrial	7	7	7	>SPAC139.02c|oac1|I|mitochondrial anion transmembrane transporter (predicted)	1	7	7	7	6	7	3	6	6	7	3	6	6	7	3	6	23.4	23.4	23.4	35.547	320	320	0	19.916	By MS/MS	By MS/MS	By MS/MS	By MS/MS	20.9	23.4	12.2	18.4	71619000	17441000	24228000	12671000	17279000	11867000	17508000	16132000	17949000	3	6	3
SPAC13A11.01c|rga8|I|Rho-type	SPAC13A11.01c|rga8|I|Rho-type	1	1	1	>SPAC13A11.01c|rga8|I|Rho-type GTPase activating protein Rga8	1	1	1	1	1	1	1	1	1	1	1	1	1	1	1	1	1.3	1.3	1.3	88.207	777	777	0	5.9827	By MS/MS	By MS/MS	By MS/MS	By MS/MS	1.3	1.3	1.3	1.3	5191600	1369300	981050	1270100	1571200	0	0	0	1571200	1	1	1
SPAC13A11.02c|erg11|I|sterol	SPAC13A11.02c|erg11|I|sterol	11	11	11	>SPAC13A11.02c|erg11|I|sterol 14-demethylase Erg11 (predicted)	1	11	11	11	8	6	10	7	8	6	10	7	8	6	10	7	33.3	33.3	33.3	56.331	495	495	0	105.02	By MS/MS	By MS/MS	By MS/MS	By MS/MS	25.5	16.4	28.5	19.8	404310000	101530000	95795000	116380000	90599000	74122000	103470000	75610000	101930000	7	7	7
SPAC13A11.05|ysp2|I|peptidase	SPAC13A11.05|ysp2|I|peptidase	3	3	3	>SPAC13A11.05|ysp2|I|peptidase family M17 cytoplasmic leucyl aminopeptidase yspII (LAP yspII)	1	3	3	3	2	1	2	2	2	1	2	2	2	1	2	2	7.6	7.6	7.6	56.194	513	513	0	7.8602	By matching	By matching	By MS/MS	By MS/MS	4.7	1.8	5.8	4.7	38121000	16879000	1120400	16782000	3340100	0	0	0	3340100	0	0	2
SPCC1494.11c|Tf2-13|III|retrotransposable;SPBC1E8.04|Tf2-10|II|retrotransposable;SPCC1020.14|Tf2-12|III|retrotransposable;SPBC9B6.02c|Tf2-9|II|retrotransposable;SPBC1289.17|Tf2-11|II|retrotransposable;SPAPB15E9.03c|Tf2-5|I|retrotransposable;SPAC9.04|Tf2-1|I|retrotransposable;SPAC2E1P3.03c|Tf2-3|I|retrotransposable;SPAC27E2.08|Tf2-6|I|retrotransposable;SPAC26A3.13c|Tf2-4|I|retrotransposable;SPAC19…	SPCC1494.11c|Tf2-13|III|retrotransposable;SPBC1E8.04|Tf2-10|II|retrotransposable;SPCC1020.14|Tf2-12|III|retrotransposable;SPBC9B6.02c|Tf2-9|II|retrotransposable;SPBC1289.17|Tf2-11|II|retrotransposable;SPAPB15E9.03c|Tf2-5|I|retrotransposable;SPAC9.04|Tf2-1|I|retrotransposable;SPAC2E1P3.03c|Tf2-3|I|retrotransposable;SPAC27E2.08|Tf2-6|I|retrotransposable;SPAC26A3.13c|Tf2-4|I|retrotransposable;SPAC19…	5;5;5;5;5;5;5;5;5;5;5;5;5	5;5;5;5;5;5;5;5;5;5;5;5;5	5;5;5;5;5;5;5;5;5;5;5;5;5	>SPCC1494.11c|Tf2-13|III|retrotransposable element/transposon Tf2-type;>SPBC1E8.04|Tf2-10|II|retrotransposable element/transposon Tf2-type;>SPCC1020.14|Tf2-12|III|retrotransposable element/transposon Tf2-type;>SPBC9B6.02c|Tf2-9|II|retrotransposable element	13	5	5	5	0	2	2	3	0	2	2	3	0	2	2	3	3.6	3.6	3.6	154.8	1332	1332;1332;1333;1333;1333;1333;1333;1333;1333;1333;1333;1333;1333	0	8.0034	By matching	By MS/MS	By matching	By MS/MS	0	1.5	1.4	2.1	13280000	0	2274100	3035700	7970000	0	0	3983500	6501100	0	2	0
SPAC13F5.03c|gld1|I|mitochondrial	SPAC13F5.03c|gld1|I|mitochondrial	1	1	1	>SPAC13F5.03c|gld1|I|mitochondrial glycerol dehydrogenase Gld1	1	1	1	1	0	1	0	1	0	1	0	1	0	1	0	1	2.4	2.4	2.4	49.433	450	450	0.0016064	2.7814	By matching	By MS/MS	By matching	By matching	0	2.4	0	2.4	6771400	0	3665700	0	3105700	0	0	0	3105700	0	1	0
SPAC13F5.06c|sec10|I|exocyst	SPAC13F5.06c|sec10|I|exocyst	7	7	7	>SPAC13F5.06c|sec10|I|exocyst complex subunit Sec10	1	7	7	7	4	4	5	5	4	4	5	5	4	4	5	5	9.6	9.6	9.6	92.515	811	811	0	18.856	By MS/MS	By MS/MS	By MS/MS	By MS/MS	5.5	5.3	6.4	6.4	44285000	7091800	10831000	15131000	11231000	7805400	10623000	10752000	9949400	3	2	4
SPAC13G6.02c|rps101|I|40S	SPAC13G6.02c|rps101|I|40S	8	4	4	>SPAC13G6.02c|rps101|I|40S ribosomal protein S3a	1	8	4	4	8	5	6	6	4	2	3	3	4	2	3	3	31.7	22.6	22.6	28.488	252	252	0	18.763	By MS/MS	By MS/MS	By MS/MS	By MS/MS	31.7	21	25.8	24.6	62529000	15959000	16084000	15276000	15210000	13191000	14671000	13669000	13658000	2	2	4
SPAC13G6.03|gpi7|I|GPI	SPAC13G6.03|gpi7|I|GPI	2	2	2	>SPAC13G6.03|gpi7|I|GPI anchor biosynthesis protein Gpi7 (predicted)	1	2	2	2	0	1	0	1	0	1	0	1	0	1	0	1	4.2	4.2	4.2	85.645	758	758	0	3.9118	By matching	By MS/MS	By matching	By MS/MS	0	2.9	0	1.3	4135700	0	0	0	4135700	0	0	0	4135700	0	1	0
SPAC13G6.04|tim8|I|TIM22	SPAC13G6.04|tim8|I|TIM22	1	1	1	>SPAC13G6.04|tim8|I|TIM22 inner membrane protein import complex subunit Tim8 (predicted)	1	1	1	1	1	0	1	1	1	0	1	1	1	0	1	1	11.5	11.5	11.5	9.9873	87	87	0	3.71	By MS/MS	By matching	By MS/MS	By MS/MS	11.5	0	11.5	11.5	8513700	3825700	0	2947300	1740700	0	0	0	1740700	1	0	1
SPAC13G6.06c|gcv2|I|glycine	SPAC13G6.06c|gcv2|I|glycine	33	33	33	>SPAC13G6.06c|gcv2|I|glycine cleavage complex subunit P (predicted)	1	33	33	33	31	20	28	19	31	20	28	19	31	20	28	19	44.2	44.2	44.2	114.23	1031	1031	0	323.31	By MS/MS	By MS/MS	By MS/MS	By MS/MS	41.3	27.6	36.9	25.5	1392500000	526970000	252060000	397120000	216390000	416180000	233510000	326610000	222660000	37	20	29
SPAC13G6.11c|erg12|I|mevalonate	SPAC13G6.11c|erg12|I|mevalonate	5	5	5	>SPAC13G6.11c|erg12|I|mevalonate kinase Erg12 (predicted)	1	5	5	5	3	4	3	4	3	4	3	4	3	4	3	4	13.6	13.6	13.6	43.406	404	404	0	23.368	By MS/MS	By MS/MS	By MS/MS	By MS/MS	10.6	11.1	10.6	9.4	50615000	9379200	16510000	8961200	15764000	8661400	8992600	10357000	17410000	2	3	2
SPAC13G7.01c|erg7|I|lanosterol	SPAC13G7.01c|erg7|I|lanosterol	2	2	2	>SPAC13G7.01c|erg7|I|lanosterol synthase Erg7	1	2	2	2	2	2	1	1	2	2	1	1	2	2	1	1	4.3	4.3	4.3	82.818	721	721	0	6.0996	By matching	By MS/MS	By MS/MS	By MS/MS	4.3	4.3	1.8	1.8	21643000	6910500	8386500	2722100	3623700	0	7338300	0	0	0	1	0
SPAC13G7.02c|ssa1|I|heat	SPAC13G7.02c|ssa1|I|heat	20	2	2	>SPAC13G7.02c|ssa1|I|heat shock protein Ssa1 (predicted)	1	20	2	2	20	18	20	19	2	1	2	2	2	1	2	2	32.3	3.7	3.7	70.142	644	644	0	6.0568	By MS/MS	By MS/MS	By MS/MS	By MS/MS	32.3	29.3	32.3	30.9	32005000	8768700	5114900	11196000	6925600	7624900	0	8941900	6913800	1	1	1
SPAC13G7.06|met16|I|phosphoadenosine	SPAC13G7.06|met16|I|phosphoadenosine	2	2	2	>SPAC13G7.06|met16|I|phosphoadenosine phosphosulfate reductase	1	2	2	2	1	0	2	2	1	0	2	2	1	0	2	2	9.4	9.4	9.4	30.56	266	266	0	3.2707	By matching	By matching	By MS/MS	By MS/MS	4.5	0	9.4	9.4	12399000	1084500	0	3880800	7433600	0	0	4574000	6074200	0	0	1
SPAC13G7.12c|eki1|I|choline/ethanolamine	SPAC13G7.12c|eki1|I|choline/ethanolamine	3	3	3	>SPAC13G7.12c|eki1|I|choline/ethanolamine kinase Eki1 (predicted)	1	3	3	3	0	1	1	3	0	1	1	3	0	1	1	3	9	9	9	52.535	456	456	0	8.401	By matching	By MS/MS	By matching	By MS/MS	0	2.6	4.8	9	15463000	0	0	4126700	11336000	0	0	0	11336000	0	1	0
SPAC140.01|sdh2|I|succinate	SPAC140.01|sdh2|I|succinate	3	3	3	>SPAC140.01|sdh2|I|succinate dehydrogenase (ubiquinone) iron-sulfur protein subunit (predicted)	1	3	3	3	2	2	2	1	2	2	2	1	2	2	2	1	12	12	12	31.425	275	275	0	9.0515	By MS/MS	By MS/MS	By MS/MS	By MS/MS	7.6	7.6	8.4	3.6	29824000	11318000	8562000	6394100	3550400	9259200	7630300	0	0	2	2	2
SPAC140.02|gar2|I|nucleolar	SPAC140.02|gar2|I|nucleolar	2	2	2	>SPAC140.02|gar2|I|nucleolar protein required for rRNA processing	1	2	2	2	2	1	2	0	2	1	2	0	2	1	2	0	4.8	4.8	4.8	52.987	500	500	0	4.862	By MS/MS	By matching	By MS/MS	By matching	4.8	2.8	4.8	0	17132000	5643800	5780600	5707700	0	0	0	4727900	0	2	0	1
SPAC140.03|arb1|I|argonaute	SPAC140.03|arb1|I|argonaute	1	1	1	>SPAC140.03|arb1|I|argonaute inhibitor protein 1	1	1	1	1	0	0	1	0	0	0	1	0	0	0	1	0	2.3	2.3	2.3	45.631	399	399	0.0061538	2.2736	By matching	By matching	By MS/MS	By matching	0	0	2.3	0	239950000	0	0	239950000	0	0	0	198760000	0	0	0	2
SPAC1420.02c|cct5|I|chaperonin-containing	SPAC1420.02c|cct5|I|chaperonin-containing	7	7	7	>SPAC1420.02c|cct5|I|chaperonin-containing T-complex epsilon subunit Cct5	1	7	7	7	5	6	4	4	5	6	4	4	5	6	4	4	20.1	20.1	20.1	59.377	546	546	0	35.634	By MS/MS	By MS/MS	By MS/MS	By MS/MS	10.8	17	7.7	7.7	75039000	21290000	22325000	14030000	17394000	18194000	14116000	13792000	20126000	4	7	4
SPAPB8E5.02c|rpn502|I|19S;SPAC1420.03|rpn501|I|19S	SPAPB8E5.02c|rpn502|I|19S;SPAC1420.03|rpn501|I|19S	12;12	12;12	12;12	>SPAPB8E5.02c|rpn502|I|19S proteasome regulatory subunit Rpn502;>SPAC1420.03|rpn501|I|19S proteasome regulatory subunit Rpn501	2	12	12	12	11	11	10	11	11	11	10	11	11	11	10	11	29.8	29.8	29.8	51.618	443	443;443	0	78.24	By MS/MS	By MS/MS	By MS/MS	By MS/MS	27.1	27.1	26.9	27.3	451170000	115470000	117000000	120710000	97992000	91215000	95027000	95875000	114120000	11	11	9
SPAC144.03|ade2|I|adenylosuccinate	SPAC144.03|ade2|I|adenylosuccinate	7	7	7	>SPAC144.03|ade2|I|adenylosuccinate synthetase Ade2	1	7	7	7	6	7	5	5	6	7	5	5	6	7	5	5	21.9	21.9	21.9	47.876	434	434	0	29.937	By MS/MS	By MS/MS	By MS/MS	By MS/MS	19.6	21.9	16.6	16.6	134810000	30918000	51794000	23436000	28659000	24710000	39635000	20816000	33904000	3	5	3
SPAC31G5.03|rps1101|I|40S;SPAC144.11|rps1102|I|40S	SPAC31G5.03|rps1101|I|40S;SPAC144.11|rps1102|I|40S	8;8	8;8	8;8	>SPAC31G5.03|rps1101|I|40S ribosomal protein S11 (predicted);>SPAC144.11|rps1102|I|40S ribosomal protein S11 (predicted)	2	8	8	8	8	7	7	5	8	7	7	5	8	7	7	5	51.3	51.3	51.3	17.5	152	152;152	0	46.465	By MS/MS	By MS/MS	By MS/MS	By MS/MS	51.3	44.1	44.1	37.5	321870000	103270000	65993000	106050000	46560000	68724000	68203000	76826000	64144000	8	7	6
SPAC144.12|rki1|I|ribose	SPAC144.12|rki1|I|ribose	2	2	2	>SPAC144.12|rki1|I|ribose 5-phosphate isomerase Rki1 (predicted)	1	2	2	2	0	2	1	1	0	2	1	1	0	2	1	1	6.9	6.9	6.9	29.329	274	274	0	3.4439	By matching	By MS/MS	By matching	By MS/MS	0	6.9	3.3	3.3	5520100	0	2425900	2132600	961570	0	2122700	0	0	0	2	0
SPAC1486.01|sod2|I|mitochondrial	SPAC1486.01|sod2|I|mitochondrial	3	3	3	>SPAC1486.01|sod2|I|mitochondrial superoxide dismutase Sod2	1	3	3	3	2	3	1	2	2	3	1	2	2	3	1	2	22.9	22.9	22.9	24.346	218	218	0	15.633	By MS/MS	By MS/MS	By MS/MS	By matching	18.8	22.9	4.1	18.8	16284000	6416300	5304100	0	4563600	0	0	0	4563600	0	2	1
SPAC1486.04c|alm1|I|medial	SPAC1486.04c|alm1|I|medial	8	8	8	>SPAC1486.04c|alm1|I|medial ring protein Alm1	1	8	8	8	5	6	5	3	5	6	5	3	5	6	5	3	5	5	5	197.86	1727	1727	0	19.029	By MS/MS	By MS/MS	By MS/MS	By MS/MS	3.8	4.4	3	2	62629000	19598000	19339000	13310000	10381000	16273000	0	0	0	2	3	1
SPAC14C4.11|vtc2|I|polyphosphate	SPAC14C4.11|vtc2|I|polyphosphate	24	24	24	>SPAC14C4.11|vtc2|I|polyphosphate synthetase, VTC complex subunit Vtc2/3 (predicted)	1	24	24	24	23	16	22	16	23	16	22	16	23	16	22	16	39.1	39.1	39.1	85.444	734	734	0	127.1	By MS/MS	By MS/MS	By MS/MS	By MS/MS	37.7	28.2	37.1	27	792530000	204890000	183200000	234740000	169710000	150180000	174820000	175710000	172880000	28	17	19
SPAC14C4.14|atp1|I|F1-ATPase	SPAC14C4.14|atp1|I|F1-ATPase	13	13	13	>SPAC14C4.14|atp1|I|F1-ATPase alpha subunit	1	13	13	13	10	10	9	10	10	10	9	10	10	10	9	10	26.1	26.1	26.1	58.587	536	536	0	159	By MS/MS	By MS/MS	By MS/MS	By MS/MS	21.3	20.3	20.1	20.7	291610000	77979000	65954000	87623000	60057000	69822000	57245000	70000000	58029000	8	8	8
SPAC1527.03|SPAC1527.03|I|RNA-binding	SPAC1527.03|SPAC1527.03|I|RNA-binding	2	2	2	>SPAC1527.03|SPAC1527.03|I|RNA-binding protein (predicted)	1	2	2	2	1	1	2	2	1	1	2	2	1	1	2	2	6.3	6.3	6.3	53.232	475	475	0	3.9091	By MS/MS	By matching	By MS/MS	By matching	3.4	3.4	6.3	6.3	16667000	2618300	2323300	5756600	5968800	0	0	0	5968800	1	0	0
SPAC1556.01c|rad50|I|DNA	SPAC1556.01c|rad50|I|DNA	3	3	3	>SPAC1556.01c|rad50|I|DNA repair protein Rad50	1	3	3	3	2	2	1	2	2	2	1	2	2	2	1	2	2.9	2.9	2.9	149.03	1285	1285	0	8.5386	By MS/MS	By MS/MS	By matching	By MS/MS	1.6	2.1	0.8	2.1	18010000	5367700	4507700	1746800	6387700	0	4325900	0	6006100	1	0	0
SPAC1556.02c|sdh1|I|succinate	SPAC1556.02c|sdh1|I|succinate	18	18	18	>SPAC1556.02c|sdh1|I|succinate dehydrogenase Sdh1 (predicted)	1	18	18	18	14	15	15	13	14	15	15	13	14	15	15	13	38.8	38.8	38.8	70.465	641	641	0	88.135	By MS/MS	By MS/MS	By MS/MS	By MS/MS	33.1	30.6	33.2	30.6	402450000	100150000	129870000	80051000	92387000	76528000	107250000	66574000	105140000	11	18	10
SPAC1556.07|pmm1|I|phosphomannomutase	SPAC1556.07|pmm1|I|phosphomannomutase	5	5	5	>SPAC1556.07|pmm1|I|phosphomannomutase Pmm1	1	5	5	5	4	3	3	3	4	3	3	3	4	3	3	3	26.8	26.8	26.8	29.223	257	257	0	14.923	By MS/MS	By MS/MS	By MS/MS	By MS/MS	19.8	14.4	12.8	14.4	62209000	21095000	13892000	15731000	11491000	14105000	13717000	13999000	12372000	4	3	3
SPAC1556.08c|cbs2|I|AMP-activated	SPAC1556.08c|cbs2|I|AMP-activated	1	1	1	>SPAC1556.08c|cbs2|I|AMP-activated protein kinase gamma subunit cbs2	1	1	1	1	0	0	1	0	0	0	1	0	0	0	1	0	2.1	2.1	2.1	37.427	334	334	0.0090566	2.1473	By matching	By matching	By MS/MS	By matching	0	0	2.1	0	0	0	0	0	0	0	0	0	0	0	0	1
SPAC1565.05|utp8|I|t-UTP	SPAC1565.05|utp8|I|t-UTP	5	5	5	>SPAC1565.05|utp8|I|t-UTP complex subunit Utp8 (predicted)	1	5	5	5	2	4	1	4	2	4	1	4	2	4	1	4	7.1	7.1	7.1	86.679	773	773	0	11.193	By MS/MS	By MS/MS	By matching	By MS/MS	2.7	6.2	1.6	5.8	30320000	3819400	11655000	665760	14180000	6303900	10952000	0	10293000	1	2	0
SPAC1565.08|cdc48|I|AAA	SPAC1565.08|cdc48|I|AAA	11	11	11	>SPAC1565.08|cdc48|I|AAA family ATPase involved in ubiquitin-mediated protein degradation Cdc48	1	11	11	11	6	7	8	6	6	7	8	6	6	7	8	6	17.1	17.1	17.1	90.124	815	815	0	50.906	By MS/MS	By MS/MS	By MS/MS	By MS/MS	9.4	10.6	12.4	10.6	163270000	39729000	44119000	47008000	32416000	33535000	38626000	35199000	35586000	7	8	8
SPAC15A10.02|taf12|I|transcription	SPAC15A10.02|taf12|I|transcription	4	4	4	>SPAC15A10.02|taf12|I|transcription factor TFIID complex subunit A/ SAGA complex subunit Taf12	1	4	4	4	3	2	2	1	3	2	2	1	3	2	2	1	9.6	9.6	9.6	49.195	450	450	0	29.079	By MS/MS	By MS/MS	By MS/MS	By MS/MS	7.8	4.2	4.2	2.4	38625000	24292000	10587000	742490	3004200	20170000	0	0	0	3	1	2
SPAC15A10.11|ubr11|I|UBR	SPAC15A10.11|ubr11|I|UBR	8	8	8	>SPAC15A10.11|ubr11|I|UBR ubiquitin-protein ligase E3 Ubr11	1	8	8	8	4	8	4	6	4	8	4	6	4	8	4	6	4.1	4.1	4.1	234.04	2052	2052	0	23.347	By MS/MS	By MS/MS	By MS/MS	By MS/MS	2	4.1	2	3.2	75953000	13536000	31419000	11912000	19086000	16370000	18208000	13443000	19664000	4	6	2
SPAC15E1.04|hal3|I|thymidylate	SPAC15E1.04|hal3|I|thymidylate	2	2	2	>SPAC15E1.04|hal3|I|thymidylate synthase/ flavoprotein fusion protein Hal3	1	2	2	2	0	1	2	2	0	1	2	2	0	1	2	2	3.7	3.7	3.7	69.893	625	625	0	5.7037	By matching	By MS/MS	By MS/MS	By MS/MS	0	1.6	3.7	3.7	13926000	0	2049500	6162500	5714300	0	0	0	5714300	0	1	1
SPAC16.03c|ura2|I|dihydroorotase	SPAC16.03c|ura2|I|dihydroorotase	2	2	2	>SPAC16.03c|ura2|I|dihydroorotase Ura2 (predicted)	1	2	2	2	1	1	1	2	1	1	1	2	1	1	1	2	6.8	6.8	6.8	37.552	337	337	0	6.6667	By matching	By MS/MS	By MS/MS	By MS/MS	3.6	3.6	3.3	6.8	7173600	2855500	2238100	0	2080000	0	0	0	2080000	0	1	1
SPAC1635.01|SPAC1635.01|I|mitochondrial	SPAC1635.01|SPAC1635.01|I|mitochondrial	10	10	10	>SPAC1635.01|SPAC1635.01|I|mitochondrial outer membrane voltage-dependent anion-selective channel (predicted)	1	10	10	10	10	9	8	10	10	9	8	10	10	9	8	10	56.7	56.7	56.7	29.653	282	282	0	219.82	By MS/MS	By MS/MS	By MS/MS	By MS/MS	56.7	47.9	45	56.7	1296100000	374270000	306540000	335060000	280180000	309380000	271920000	298740000	256680000	16	14	11
SPAC1639.01c|SPAC1639.01c|I|GNS1/SUR4	SPAC1639.01c|SPAC1639.01c|I|GNS1/SUR4	1	1	1	>SPAC1639.01c|SPAC1639.01c|I|GNS1/SUR4 family protein (predicted)	1	1	1	1	1	1	1	1	1	1	1	1	1	1	1	1	3	3	3	41.54	365	365	0	4.5373	By MS/MS	By MS/MS	By MS/MS	By MS/MS	3	3	3	3	65971000	9768000	21247000	19359000	15597000	0	17945000	15858000	16422000	1	1	2
SPAC1687.01|rpc19|I|DNA-directed	SPAC1687.01|rpc19|I|DNA-directed	1	1	1	>SPAC1687.01|rpc19|I|DNA-directed RNA polymerase I and III subunit Rpc19	1	1	1	1	0	0	0	1	0	0	0	1	0	0	0	1	11.2	11.2	11.2	13.721	125	125	0.0024019	2.7186	By matching	By matching	By matching	By MS/MS	0	0	0	11.2	0	0	0	0	0	0	0	0	0	0	0	0
SPAC1687.06c|rpl44|I|60S	SPAC1687.06c|rpl44|I|60S	2	2	2	>SPAC1687.06c|rpl44|I|60S ribosomal protein L28/L44 (predicted)	1	2	2	2	2	2	2	2	2	2	2	2	2	2	2	2	17.2	17.2	17.2	14.755	134	134	0	12.51	By MS/MS	By MS/MS	By MS/MS	By MS/MS	17.2	17.2	17.2	17.2	45255000	12663000	10663000	12575000	9353500	0	0	0	9353500	0	1	1
SPAC1687.15|gsk3|I|serine/threonine	SPAC1687.15|gsk3|I|serine/threonine	4	4	4	>SPAC1687.15|gsk3|I|serine/threonine protein kinase Gsk3	1	4	4	4	3	2	2	3	3	2	2	3	3	2	2	3	9.6	9.6	9.6	44.165	387	387	0	12.487	By MS/MS	By MS/MS	By MS/MS	By MS/MS	8	5.2	5.2	9.6	36948000	10958000	7625400	6947200	11418000	9657500	8279900	7180900	7825100	4	2	2
SPAC1687.16c|erg31|I|C-5	SPAC1687.16c|erg31|I|C-5	1	1	1	>SPAC1687.16c|erg31|I|C-5 sterol desaturase Erg31	1	1	1	1	1	1	1	0	1	1	1	0	1	1	1	0	4	4	4	35.625	300	300	0	3.7386	By MS/MS	By MS/MS	By MS/MS	By matching	4	4	4	0	20125000	6238400	5384400	8502400	0	0	0	7042800	0	1	1	1
SPAC1687.21|SPAC1687.21|I|phosphoglycerate	SPAC1687.21|SPAC1687.21|I|phosphoglycerate	5	5	5	>SPAC1687.21|SPAC1687.21|I|phosphoglycerate mutase family (predicted)	1	5	5	5	3	3	3	3	3	3	3	3	3	3	3	3	36.8	36.8	36.8	23.698	209	209	0	23.515	By MS/MS	By MS/MS	By MS/MS	By MS/MS	23	20.6	20.1	24.4	57654000	12634000	26745000	11207000	7068200	11114000	20366000	11697000	0	2	2	2
SPAC16C9.02c|SPAC16C9.02c|I|S-methyl-5-thioadenosine	SPAC16C9.02c|SPAC16C9.02c|I|S-methyl-5-thioadenosine	1	1	1	>SPAC16C9.02c|SPAC16C9.02c|I|S-methyl-5-thioadenosine phosphorylase (predicted)	1	1	1	1	1	1	0	1	1	1	0	1	1	1	0	1	4.9	4.9	4.9	33.847	307	307	0.000819	2.9657	By matching	By MS/MS	By matching	By MS/MS	4.9	4.9	0	4.9	2555600	1158000	1397600	0	0	0	1222900	0	0	0	1	0
SPAC16C9.06c|upf1|I|ATP-dependent;SPAC6G9.10c|sen1|I|ATP-dependent;SPBC29A10.10c|dbl8|II|tRNA-splicing	SPAC16C9.06c|upf1|I|ATP-dependent	11;1;1	11;1;1	11;1;1	>SPAC16C9.06c|upf1|I|ATP-dependent RNA helicase Upf1	3	11	11	11	10	8	11	7	10	8	11	7	10	8	11	7	16.1	16.1	16.1	104.53	925	925;1687;1944	0	50.444	By MS/MS	By MS/MS	By MS/MS	By MS/MS	15.4	12	16.1	10.3	164990000	44991000	41418000	51229000	27356000	33594000	37180000	35254000	37362000	8	8	10
SPAC16E8.01|shd1|I|cytoskeletal	SPAC16E8.01|shd1|I|cytoskeletal	17	17	17	>SPAC16E8.01|shd1|I|cytoskeletal protein binding protein Sla1 family, Shd1 (predicted)	1	17	17	17	10	10	14	11	10	10	14	11	10	10	14	11	19	19	19	154.63	1420	1420	0	112.64	By MS/MS	By MS/MS	By MS/MS	By MS/MS	9	10.1	14.3	13.1	367340000	90473000	79920000	108470000	88477000	75751000	74799000	87147000	85684000	9	10	15
SPAC16E8.07c|vph1|I|V-type	SPAC16E8.07c|vph1|I|V-type	5	5	5	>SPAC16E8.07c|vph1|I|V-type ATPase V0 subunit a (predicted)	1	5	5	5	5	4	5	4	5	4	5	4	5	4	5	4	7.7	7.7	7.7	94.158	831	831	0	27.281	By MS/MS	By MS/MS	By MS/MS	By MS/MS	7.7	5.4	7.7	6.4	101170000	35292000	29699000	21048000	15132000	24084000	24981000	19342000	18789000	6	4	6
SPAC1751.03|tif313|I|translation	SPAC1751.03|tif313|I|translation	5	5	5	>SPAC1751.03|tif313|I|translation initiation factor eIF3m	1	5	5	5	5	5	5	4	5	5	5	4	5	5	5	4	15.9	15.9	15.9	45.085	402	402	0	21.578	By MS/MS	By MS/MS	By MS/MS	By MS/MS	15.9	15.9	15.9	12.7	124180000	37010000	34653000	32536000	19985000	35303000	28098000	35504000	9082400	6	4	5
SPAC1782.05|ypa2|I|protein	SPAC1782.05|ypa2|I|protein	3	3	3	>SPAC1782.05|ypa2|I|protein phosphatase type 2A regulator, PTPA family Ypa2	1	3	3	3	2	2	1	1	2	2	1	1	2	2	1	1	16.8	16.8	16.8	40.288	352	352	0	14.261	By MS/MS	By MS/MS	By MS/MS	By MS/MS	11.4	10.2	6.5	4.8	22727000	9541400	6068700	3882000	3234500	7922500	0	0	0	2	2	1
SPAC1782.07|qcr8|I|ubiquinol-cytochrome-c	SPAC1782.07|qcr8|I|ubiquinol-cytochrome-c	1	1	1	>SPAC1782.07|qcr8|I|ubiquinol-cytochrome-c reductase complex subunit 7	1	1	1	1	1	1	1	1	1	1	1	1	1	1	1	1	14.1	14.1	14.1	10.467	92	92	0.0008058	2.8104	By MS/MS	By MS/MS	By MS/MS	By MS/MS	14.1	14.1	14.1	14.1	10281000	2459000	2393700	2715300	2713300	0	0	0	2713300	0	0	0
SPAC1782.11|met14|I|adenylyl-sulfate	SPAC1782.11|met14|I|adenylyl-sulfate	3	3	3	>SPAC1782.11|met14|I|adenylyl-sulfate kinase (predicted)	1	3	3	3	3	3	2	3	3	3	2	3	3	3	2	3	19.8	19.8	19.8	22.669	202	202	0	51.126	By MS/MS	By MS/MS	By MS/MS	By MS/MS	19.8	19.8	15.8	19.8	87702000	19799000	29035000	18124000	20744000	16674000	24975000	16263000	19691000	3	4	2
SPAC1783.07c|pap1|I|transcription	SPAC1783.07c|pap1|I|transcription	1	1	1	>SPAC1783.07c|pap1|I|transcription factor Pap1/Caf3	1	1	1	1	1	0	1	0	1	0	1	0	1	0	1	0	2.5	2.5	2.5	61.531	552	552	0	3.2706	By matching	By matching	By MS/MS	By matching	2.5	0	2.5	0	3539300	1575900	0	1963500	0	0	0	1626400	0	0	0	1
SPAC1783.08c|rpl1502|I|60S	SPAC1783.08c|rpl1502|I|60S	9	1	1	>SPAC1783.08c|rpl1502|I|60S ribosomal protein L15b (predicted)	1	9	1	1	9	9	9	8	1	1	1	1	1	1	1	1	47.3	6	6	23.822	201	201	0	3.8823	By MS/MS	By MS/MS	By MS/MS	By MS/MS	47.3	47.3	47.3	43.8	33906000	7978000	9107100	8957000	7863500	5618400	7806600	7595600	7791900	3	2	3
SPAC1786.01c|ptl2|I|triacylglycerol	SPAC1786.01c|ptl2|I|triacylglycerol	3	3	3	>SPAC1786.01c|ptl2|I|triacylglycerol lipase ptl2	1	3	3	3	2	1	0	1	2	1	0	1	2	1	0	1	5.2	5.2	5.2	72.521	630	630	0	5.2971	By MS/MS	By MS/MS	By matching	By MS/MS	4	1.3	0	2.5	8392400	4093100	1882600	0	2416800	0	0	0	2416800	1	0	0
SPAC1786.03|cut11|I|spindle	SPAC1786.03|cut11|I|spindle	2	2	2	>SPAC1786.03|cut11|I|spindle pole body docking protein Cut11	1	2	2	2	1	0	1	1	1	0	1	1	1	0	1	1	2.7	2.7	2.7	69.354	601	601	0	3.4406	By MS/MS	By matching	By MS/MS	By MS/MS	1.3	0	1.3	1.3	3728500	2019100	0	1709400	0	0	0	1416000	0	0	0	0
SPAC17A2.01|bsu1|I|high-affinity	SPAC17A2.01|bsu1|I|high-affinity	2	2	2	>SPAC17A2.01|bsu1|I|high-affinity import carrier for pyridoxine, pyridoxal, and pyridoxamine Bsu1	1	2	2	2	2	2	1	1	2	2	1	1	2	2	1	1	4	4	4	58.484	526	526	0	5.9959	By MS/MS	By MS/MS	By MS/MS	By MS/MS	4	4	1.5	2.5	30970000	3275400	16610000	3751900	7332700	0	14534000	0	0	1	2	1
SPAC17A2.02c|SPAC17A2.02c|I|DUF887	SPAC17A2.02c|SPAC17A2.02c|I|DUF887	2	2	2	>SPAC17A2.02c|SPAC17A2.02c|I|DUF887 family protein	1	2	2	2	2	2	2	1	2	2	2	1	2	2	2	1	10	10	10	33.042	290	290	0	5.3862	By MS/MS	By matching	By MS/MS	By MS/MS	10	10	10	5.2	73720000	21333000	17861000	21003000	13522000	17681000	0	17430000	0	1	0	1
SPAC17A2.03c|vma6|I|V-type	SPAC17A2.03c|vma6|I|V-type	3	3	3	>SPAC17A2.03c|vma6|I|V-type ATPase V0 subunit d (predicted)	1	3	3	3	2	1	2	2	2	1	2	2	2	1	2	2	10.8	10.8	10.8	39.323	343	343	0	8.3474	By MS/MS	By MS/MS	By MS/MS	By MS/MS	8.2	3.2	5.8	8.2	21013000	6151700	6311200	3471400	5078900	0	0	0	5078900	2	1	2
SPAC17A2.13c|rad25|I|14-3-3	SPAC17A2.13c|rad25|I|14-3-3	10	10	8	>SPAC17A2.13c|rad25|I|14-3-3 protein Rad25	1	10	10	8	10	7	10	6	10	7	10	6	8	5	8	4	41.9	41.9	35.2	30.369	270	270	0	68.064	By MS/MS	By MS/MS	By MS/MS	By MS/MS	41.9	31.1	41.9	24.4	469080000	114480000	95801000	188700000	70090000	85305000	85662000	142410000	72339000	12	9	13
SPAC17A2.14|SPAC17A2.14|I|CorA	SPAC17A2.14|SPAC17A2.14|I|CorA	5	5	5	>SPAC17A2.14|SPAC17A2.14|I|CorA family magnesium ion transmembrane transporter	1	5	5	5	5	4	3	2	5	4	3	2	5	4	3	2	10.2	10.2	10.2	71.197	617	617	0	17.163	By MS/MS	By matching	By MS/MS	By MS/MS	10.2	8.8	6.2	4.5	45669000	15348000	12307000	10315000	7698100	11824000	8180500	9330600	10421000	4	0	2
SPAC17A5.01|pex6|I|peroxin-6	SPAC17A5.01|pex6|I|peroxin-6	1	1	1	>SPAC17A5.01|pex6|I|peroxin-6 (predicted)	1	1	1	1	0	0	0	1	0	0	0	1	0	0	0	1	1.4	1.4	1.4	106.5	948	948	0.0061586	2.2749	By matching	By matching	By matching	By MS/MS	0	0	0	1.4	1586900	0	0	0	1586900	0	0	0	1586900	0	0	0
SPAPB8E5.06c|rpl302|I|60S;SPAC17A5.03|rpl301|I|60S	SPAPB8E5.06c|rpl302|I|60S;SPAC17A5.03|rpl301|I|60S	15;15	15;15	15;15	>SPAPB8E5.06c|rpl302|I|60S ribosomal protein L3;>SPAC17A5.03|rpl301|I|60S ribosomal protein L3	2	15	15	15	10	12	12	12	10	12	12	12	10	12	12	12	38.1	38.1	38.1	43.816	388	388;388	0	85.957	By MS/MS	By MS/MS	By MS/MS	By MS/MS	27.6	30.2	33.5	31.4	362060000	72812000	109370000	84992000	94885000	65573000	89945000	70874000	92121000	10	7	10
SPAC17A5.14|exo2|I|exonuclease	SPAC17A5.14|exo2|I|exonuclease	20	20	20	>SPAC17A5.14|exo2|I|exonuclease II Exo2	1	20	20	20	15	18	16	15	15	18	16	15	15	18	16	15	19.1	19.1	19.1	152.59	1328	1328	0	71.259	By MS/MS	By MS/MS	By MS/MS	By MS/MS	13.6	17	14.5	15.1	405510000	85710000	126810000	95875000	97113000	78309000	100570000	77906000	101880000	12	16	11
SPAC17A5.15c|gus1|I|cytoplasmic	SPAC17A5.15c|gus1|I|cytoplasmic	7	7	7	>SPAC17A5.15c|gus1|I|cytoplasmic glutamate-tRNA ligase gus1 (predicted)	1	7	7	7	4	5	4	3	4	5	4	3	4	5	4	3	12	12	12	80.749	716	716	0	26.764	By MS/MS	By MS/MS	By MS/MS	By MS/MS	8.1	8.7	6.6	2.9	89151000	18687000	34333000	24046000	12086000	17925000	20206000	20771000	18660000	1	5	2
SPAC17A5.16|ftp105|I|Ubp5	SPAC17A5.16|ftp105|I|Ubp5	4	4	4	>SPAC17A5.16|ftp105|I|Ubp5 interacting protein Ftp105	1	4	4	4	1	3	1	3	1	3	1	3	1	3	1	3	5.2	5.2	5.2	104.83	925	925	0	11.4	By MS/MS	By MS/MS	By MS/MS	By MS/MS	1.4	3.8	1.4	3.8	11989000	2174200	0	2373400	7441200	0	0	0	7441200	1	3	1
SPAC17C9.03|tif471|I|translation	SPAC17C9.03|tif471|I|translation	16	16	16	>SPAC17C9.03|tif471|I|translation initiation factor eIF4G	1	16	16	16	14	9	12	7	14	9	12	7	14	9	12	7	17.5	17.5	17.5	154.03	1403	1403	0	77.921	By MS/MS	By MS/MS	By MS/MS	By MS/MS	14	9.4	13	6.7	356290000	105680000	76602000	97982000	76030000	77548000	71809000	72039000	90572000	15	8	9
SPAC17C9.07|alg8|I|glucosyltransferase	SPAC17C9.07|alg8|I|glucosyltransferase	2	2	2	>SPAC17C9.07|alg8|I|glucosyltransferase Alg8 (predicted)	1	2	2	2	1	2	2	2	1	2	2	2	1	2	2	2	4.8	4.8	4.8	57.605	501	501	0	12.357	By MS/MS	By MS/MS	By MS/MS	By MS/MS	1.6	4.8	4.8	4.8	14962000	2503200	5483800	2681400	4293500	0	4833600	0	4258300	1	2	2
SPAC17C9.09c|tim13|I|TIM22	SPAC17C9.09c|tim13|I|TIM22	2	2	2	>SPAC17C9.09c|tim13|I|TIM22 inner membrane protein import complex subunit Tim13 (predicted)	1	2	2	2	1	2	2	2	1	2	2	2	1	2	2	2	25.3	25.3	25.3	10.742	95	95	0	9.0465	By MS/MS	By MS/MS	By MS/MS	By MS/MS	14.7	25.3	25.3	25.3	59753000	14971000	13442000	18552000	12787000	0	0	0	12787000	0	0	1
SPAC17C9.10|stm1|I|G-protein	SPAC17C9.10|stm1|I|G-protein	2	2	2	>SPAC17C9.10|stm1|I|G-protein coupled receptor Stm1	1	2	2	2	2	2	1	2	2	2	1	2	2	2	1	2	7	7	7	30.614	271	271	0	19.74	By MS/MS	By MS/MS	By matching	By MS/MS	7	7	2.6	7	37776000	12063000	12646000	6976200	6090900	10128000	11164000	0	5879800	1	2	0
SPAC17C9.12|scs22|I|VAP	SPAC17C9.12|scs22|I|VAP	1	1	1	>SPAC17C9.12|scs22|I|VAP family protein Scs22	1	1	1	1	1	1	1	1	1	1	1	1	1	1	1	1	9.4	9.4	9.4	34.005	319	319	0	16.354	By MS/MS	By MS/MS	By matching	By matching	9.4	9.4	9.4	9.4	48778000	10941000	13392000	11633000	12811000	0	0	0	12811000	1	2	0
SPAC17D4.01|pex7|I|peroxin-7	SPAC17D4.01|pex7|I|peroxin-7	6	6	6	>SPAC17D4.01|pex7|I|peroxin-7 (predicted)	1	6	6	6	5	3	4	3	5	3	4	3	5	3	4	3	29.5	29.5	29.5	34.588	308	308	0	15.276	By MS/MS	By MS/MS	By MS/MS	By MS/MS	21.8	10.7	20.5	12.7	47261000	16284000	5350000	15381000	10246000	10994000	8015200	13008000	9171700	4	1	3
SPAC17D4.02|cdc45|I|DNA	SPAC17D4.02|cdc45|I|DNA	2	2	2	>SPAC17D4.02|cdc45|I|DNA replication pre-initiation complex subunit Cdc45	1	2	2	2	0	1	1	1	0	1	1	1	0	1	1	1	3.8	3.8	3.8	73.378	638	638	0.00082372	3.0569	By matching	By matching	By MS/MS	By MS/MS	0	1.7	1.7	2	5281000	0	2040200	1482800	1758000	0	0	0	1758000	0	0	1
SPAC17D4.03c|cis4|I|cation	SPAC17D4.03c|cis4|I|cation	2	2	2	>SPAC17D4.03c|cis4|I|cation diffusion family zinc transmembrane transporter Cis4	1	2	2	2	2	2	1	2	2	2	1	2	2	2	1	2	2.2	2.2	2.2	82.739	732	732	0	8.863	By MS/MS	By MS/MS	By MS/MS	By MS/MS	2.2	2.2	1.2	2.2	23768000	7302600	2537400	6343100	7584500	0	0	0	7584500	1	1	1
SPAC17G6.06|rps2401|I|40S	SPAC17G6.06|rps2401|I|40S	1	1	1	>SPAC17G6.06|rps2401|I|40S ribosomal protein S24 (predicted)	1	1	1	1	0	1	1	0	0	1	1	0	0	1	1	0	9	9	9	15.47	134	134	0	10.129	By matching	By MS/MS	By MS/MS	By matching	0	9	9	0	2349400	0	2349400	0	0	0	2055800	0	0	0	0	1
SPAC17G6.10|ssr1|I|SWI/SNF	SPAC17G6.10|ssr1|I|SWI/SNF	1	1	1	>SPAC17G6.10|ssr1|I|SWI/SNF and RSC complex subunit Ssr1	1	1	1	1	1	1	0	1	1	1	0	1	1	1	0	1	3.2	3.2	3.2	59.638	527	527	0	3.2605	By MS/MS	By MS/MS	By matching	By matching	3.2	3.2	0	3.2	12307000	5263500	4265500	0	2777700	0	0	0	2777700	1	1	0
SPAC17G6.12|cul1|I|cullin	SPAC17G6.12|cul1|I|cullin	2	2	2	>SPAC17G6.12|cul1|I|cullin 1	1	2	2	2	1	2	2	2	1	2	2	2	1	2	2	2	3	3	3	89.425	767	767	0	4.63	By matching	By MS/MS	By MS/MS	By MS/MS	1.8	3	3	3	25445000	3304700	8963200	5044600	8132700	0	7126200	5284800	7743100	0	1	1
SPAC17G6.13|slt1|I|Schizosaccharomyces	SPAC17G6.13|slt1|I|Schizosaccharomyces	9	9	9	>SPAC17G6.13|slt1|I|Schizosaccharomyces specific protein Slt1	1	9	9	9	7	6	7	6	7	6	7	6	7	6	7	6	32.6	32.6	32.6	49.136	433	433	0	117.34	By MS/MS	By MS/MS	By MS/MS	By MS/MS	26.6	19.2	22.4	23.3	312230000	66093000	61304000	112840000	71990000	55643000	63812000	89226000	65298000	6	9	9
SPAC17G6.14c|uap56|I|TREX	SPAC17G6.14c|uap56|I|TREX	5	5	5	>SPAC17G6.14c|uap56|I|TREX complex subunit, ATP-dependent RNA helicase Uap56	1	5	5	5	3	3	4	4	3	3	4	4	3	3	4	4	11.5	11.5	11.5	49.231	434	434	0	11.718	By MS/MS	By MS/MS	By MS/MS	By MS/MS	7.1	7.1	8.8	9.9	51676000	11998000	13209000	15756000	10712000	9923000	10814000	12516000	12031000	3	3	4
SPAC17G6.16c|ysh1|I|mRNA	SPAC17G6.16c|ysh1|I|mRNA	6	6	6	>SPAC17G6.16c|ysh1|I|mRNA cleavage and polyadenylation specificity factor complex endoribonuclease subunit Ysh1	1	6	6	6	6	5	4	4	6	5	4	4	6	5	4	4	9.5	9.5	9.5	85.989	757	757	0	12.078	By MS/MS	By MS/MS	By MS/MS	By MS/MS	9.5	8.2	5.3	5.3	70711000	23001000	17620000	17457000	12633000	12360000	15893000	16292000	17064000	3	4	3
SPAC17G8.06c|SPAC17G8.06c|I|dihydroxy-acid	SPAC17G8.06c|SPAC17G8.06c|I|dihydroxy-acid	3	3	3	>SPAC17G8.06c|SPAC17G8.06c|I|dihydroxy-acid dehydratase (predicted)	1	3	3	3	2	3	2	1	2	3	2	1	2	3	2	1	5.5	5.5	5.5	63.926	598	598	0	8.4511	By matching	By MS/MS	By MS/MS	By MS/MS	4	5.5	4	1.7	34954000	7882200	13859000	9927000	3285800	0	12127000	0	0	0	2	1
SPAC17G8.08c|SPAC17G8.08c|I|human	SPAC17G8.08c|SPAC17G8.08c|I|human	3	3	3	>SPAC17G8.08c|SPAC17G8.08c|I|human TMEM165 homolog, implicated in calcium tranport	1	3	3	3	2	3	3	3	2	3	3	3	2	3	3	3	17.1	17.1	17.1	31.302	287	287	0	40.414	By MS/MS	By MS/MS	By MS/MS	By MS/MS	13.6	17.1	17.1	17.1	73281000	17124000	19191000	17255000	19711000	14958000	16289000	13858000	19910000	1	2	1
SPAC17H9.04c|nrp1|I|RNA-binding	SPAC17H9.04c|nrp1|I|RNA-binding	10	10	10	>SPAC17H9.04c|nrp1|I|RNA-binding protein	1	10	10	10	9	10	9	7	9	10	9	7	9	10	9	7	22.7	22.7	22.7	66.396	604	604	0	112.43	By MS/MS	By MS/MS	By MS/MS	By MS/MS	20	22.7	20	15.1	353110000	105130000	84397000	106250000	57326000	82749000	67267000	76410000	73371000	8	6	8
SPAC17H9.12c|SPAC17H9.12c|I|mitochondrial	SPAC17H9.12c|SPAC17H9.12c|I|mitochondrial	3	3	3	>SPAC17H9.12c|SPAC17H9.12c|I|mitochondrial cytochrome c-heme linkage protein Cyc2 (predicted)	1	3	3	3	2	2	1	2	2	2	1	2	2	2	1	2	20.7	20.7	20.7	29.375	266	266	0	9.9856	By matching	By matching	By MS/MS	By MS/MS	12.8	15.4	7.9	12.8	32331000	15619000	7692700	1952300	7066500	10514000	0	0	9522200	0	0	1
SPAC17H9.13c|SPAC17H9.13c|I|glutamate	SPAC17H9.13c|SPAC17H9.13c|I|glutamate	13	13	13	>SPAC17H9.13c|SPAC17H9.13c|I|glutamate 5-kinase (predicted)	1	13	13	13	10	10	11	11	10	10	11	11	10	10	11	11	49.3	49.3	49.3	43.933	402	402	0	77.058	By MS/MS	By MS/MS	By MS/MS	By MS/MS	35.1	32.8	35.3	41.3	513780000	124100000	112230000	141600000	135850000	102870000	105030000	110180000	136310000	10	9	10
SPAC17H9.14c|pdi2|I|protein	SPAC17H9.14c|pdi2|I|protein	7	7	7	>SPAC17H9.14c|pdi2|I|protein disulfide isomerase	1	7	7	7	4	4	5	4	4	4	5	4	4	4	5	4	23.7	23.7	23.7	40.691	359	359	0	53.804	By MS/MS	By MS/MS	By MS/MS	By MS/MS	12.3	13.1	14.8	14.8	86147000	25670000	19470000	24803000	16204000	22706000	18008000	18114000	16272000	5	5	5
SPAC1805.01c|ppk6|I|serine/threonine	SPAC1805.01c|ppk6|I|serine/threonine	1	1	1	>SPAC1805.01c|ppk6|I|serine/threonine protein kinase Ppk6 (predicted)	1	1	1	1	0	1	0	1	0	1	0	1	0	1	0	1	2.1	2.1	2.1	88.612	775	775	0.009084	2.1659	By matching	By MS/MS	By matching	By MS/MS	0	2.1	0	2.1	5770800	0	3302100	0	2468700	0	0	0	2468700	0	1	0
SPAC1805.04|nup132|I|nucleoporin	SPAC1805.04|nup132|I|nucleoporin	2	2	2	>SPAC1805.04|nup132|I|nucleoporin Nup132	1	2	2	2	1	1	1	2	1	1	1	2	1	1	1	2	2.2	2.2	2.2	132.07	1162	1162	0.000815	2.9299	By MS/MS	By MS/MS	By MS/MS	By MS/MS	0.8	0.8	0.8	2.2	10273000	1462800	1638600	1872700	5299100	0	0	0	5299100	1	1	1
SPAC1805.05|cki3|I|serine/threonine	SPAC1805.05|cki3|I|serine/threonine	3	2	2	>SPAC1805.05|cki3|I|serine/threonine protein kinase Cki3	1	3	2	2	2	3	2	3	2	2	2	2	2	2	2	2	7.5	5.5	5.5	50.214	439	439	0	8.7051	By MS/MS	By MS/MS	By MS/MS	By MS/MS	5.5	7.5	5.5	7.5	35814000	11130000	8418100	7216100	9050100	7856800	7359400	5980900	9055600	3	2	4
SPAC1805.06c|hem2|I|porphobilinogen	SPAC1805.06c|hem2|I|porphobilinogen	3	3	3	>SPAC1805.06c|hem2|I|porphobilinogen synthase Hem2 (predicted)	1	3	3	3	0	2	3	1	0	2	3	1	0	2	3	1	9.4	9.4	9.4	36.12	329	329	0	7.9674	By matching	By MS/MS	By MS/MS	By MS/MS	0	6.1	9.4	3	10969000	0	1492600	6674600	2801500	0	0	5528800	0	0	2	0
SPAC1805.13|rpl14|I|60S	SPAC1805.13|rpl14|I|60S	3	3	3	>SPAC1805.13|rpl14|I|60S ribosomal protein L14 (predicted)	1	3	3	3	2	1	3	3	2	1	3	3	2	1	3	3	23.9	23.9	23.9	15.21	134	134	0	15.129	By MS/MS	By MS/MS	By MS/MS	By MS/MS	14.9	9	23.9	23.9	27352000	5354600	4916200	5812700	11269000	0	0	7779500	8303900	1	1	1
SPAC1805.16c|SPAC1805.16c|I|purine	SPAC1805.16c|SPAC1805.16c|I|purine	14	14	14	>SPAC1805.16c|SPAC1805.16c|I|purine nucleoside phosphorylase (predicted)	1	14	14	14	12	12	14	12	12	12	14	12	12	12	14	12	57.1	57.1	57.1	34.238	315	315	0	63.608	By MS/MS	By MS/MS	By MS/MS	By MS/MS	50.8	49.8	57.1	49.8	617090000	164980000	136330000	188640000	127140000	127520000	112700000	153030000	116910000	16	14	17
SPAC1805.17|crm1|I|importin	SPAC1805.17|crm1|I|importin	31	31	31	>SPAC1805.17|crm1|I|importin family nuclear export receptor Crm1	1	31	31	31	31	24	17	11	31	24	17	11	31	24	17	11	37.9	37.9	37.9	123.57	1078	1078	0	184.07	By MS/MS	By MS/MS	By MS/MS	By MS/MS	37.9	28.5	16.2	9.6	904430000	488680000	272410000	85562000	57777000	337030000	217250000	92362000	96527000	42	24	10
SPAC1834.01|sup45|I|translation	SPAC1834.01|sup45|I|translation	2	2	2	>SPAC1834.01|sup45|I|translation release factor eRF1	1	2	2	2	2	1	2	1	2	1	2	1	2	1	2	1	5.3	5.3	5.3	48.803	433	433	0	11.711	By MS/MS	By MS/MS	By MS/MS	By MS/MS	5.3	2.5	5.3	2.5	36122000	13433000	5843300	11738000	5107600	0	0	9722900	0	0	0	1
SPAC1834.02|aro1|I|pentafunctional	SPAC1834.02|aro1|I|pentafunctional	38	38	38	>SPAC1834.02|aro1|I|pentafunctional aromatic polypeptide Aro1 (predicted)	1	38	38	38	28	28	27	27	28	28	27	27	28	28	27	27	30.6	30.6	30.6	173.78	1573	1573	0	186.71	By MS/MS	By MS/MS	By MS/MS	By MS/MS	21.3	22.6	20.9	21.2	933760000	191660000	275390000	234710000	232000000	153430000	248810000	177290000	243100000	23	27	24
SPBC8D2.03c|hhf2|II|histone;SPBC1105.12|hhf3|II|histone;SPAC1834.03c|hhf1|I|histone	SPBC8D2.03c|hhf2|II|histone;SPBC1105.12|hhf3|II|histone;SPAC1834.03c|hhf1|I|histone	4;4;4	4;4;4	4;4;4	>SPBC8D2.03c|hhf2|II|histone H4 h4.2;>SPBC1105.12|hhf3|II|histone H4 h4.3;>SPAC1834.03c|hhf1|I|histone H4 h4.1	3	4	4	4	3	1	4	1	3	1	4	1	3	1	4	1	38.8	38.8	38.8	11.423	103	103;103;103	0	30.518	By MS/MS	By matching	By MS/MS	By matching	29.1	7.8	38.8	7.8	525200000	14678000	2631300	505950000	1945500	17773000	0	394910000	0	1	0	7
SPBC8D2.04|hht2|II|histone;SPBC1105.11c|hht3|II|histone;SPAC1834.04|hht1|I|histone	SPBC8D2.04|hht2|II|histone;SPBC1105.11c|hht3|II|histone;SPAC1834.04|hht1|I|histone	2;2;2	2;2;2	2;2;2	>SPBC8D2.04|hht2|II|histone H3 h3.2;>SPBC1105.11c|hht3|II|histone H3 h3.3;>SPAC1834.04|hht1|I|histone H3 h3.1	3	2	2	2	1	0	2	0	1	0	2	0	1	0	2	0	13.2	13.2	13.2	15.357	136	136;136;136	0	20.963	By matching	By matching	By MS/MS	By matching	5.1	0	13.2	0	149760000	7235800	0	142530000	0	0	0	116480000	0	0	0	2
SPAC1834.05|alg9|I|mannosyltransferase	SPAC1834.05|alg9|I|mannosyltransferase	3	3	3	>SPAC1834.05|alg9|I|mannosyltransferase complex subunit Alg9 (predicted)	1	3	3	3	2	2	3	2	2	2	3	2	2	2	3	2	5	5	5	66.27	577	577	0	8.2829	By MS/MS	By MS/MS	By MS/MS	By MS/MS	3.8	3.8	5	3.8	40477000	9616300	10507000	10481000	9872700	7540500	9377300	9104100	9711100	2	1	2
SPAC1834.08|mak1|I|histidine	SPAC1834.08|mak1|I|histidine	10	10	10	>SPAC1834.08|mak1|I|histidine kinase Mak1	1	10	10	10	9	6	7	7	9	6	7	7	9	6	7	7	7.3	7.3	7.3	184.58	1639	1639	0	29.016	By MS/MS	By MS/MS	By MS/MS	By MS/MS	6.7	4.6	5.3	5.3	97178000	24739000	19801000	31922000	20716000	21254000	17677000	24233000	21861000	7	4	5
SPAC1834.11c|sec18|I|secretory	SPAC1834.11c|sec18|I|secretory	5	4	4	>SPAC1834.11c|sec18|I|secretory pathway protein Sec18 (predicted)	1	5	4	4	4	3	3	4	3	2	2	3	3	2	2	3	8.3	6.8	6.8	87.553	792	792	0	18.103	By MS/MS	By MS/MS	By MS/MS	By MS/MS	7.1	5.8	4	7.1	45234000	8950200	16404000	6568500	13311000	7806300	13676000	0	13614000	3	2	1
SPAC1851.02|slc1|I|1-acylglycerol-3-phosphate	SPAC1851.02|slc1|I|1-acylglycerol-3-phosphate	4	4	4	>SPAC1851.02|slc1|I|1-acylglycerol-3-phosphate O-acyltransferase Slc1 (predicted)	1	4	4	4	4	4	3	3	4	4	3	3	4	4	3	3	15.4	15.4	15.4	31.393	279	279	0	13.578	By MS/MS	By MS/MS	By MS/MS	By MS/MS	15.4	15.4	11.8	11.8	56807000	17687000	16664000	10709000	11748000	11200000	13468000	9993700	14126000	3	2	1
SPAC1851.03|ckb1|I|CK2	SPAC1851.03|ckb1|I|CK2	2	2	2	>SPAC1851.03|ckb1|I|CK2 family regulatory subunit Ckb1	1	2	2	2	1	2	0	2	1	2	0	2	1	2	0	2	8.2	8.2	8.2	26.677	231	231	0	4.293	By MS/MS	By MS/MS	By matching	By MS/MS	4.3	8.2	0	8.2	9525600	3097400	3024800	0	3403300	0	0	0	3403300	1	1	0
SPAC18B11.11|SPAC18B11.11|I|GTPase	SPAC18B11.11|SPAC18B11.11|I|GTPase	1	1	1	>SPAC18B11.11|SPAC18B11.11|I|GTPase activating protein (predicted)	1	1	1	1	1	1	1	1	1	1	1	1	1	1	1	1	0.6	0.6	0.6	149.19	1294	1294	0	3.2063	By matching	By MS/MS	By MS/MS	By matching	0.6	0.6	0.6	0.6	7750800	1964000	1849200	1776200	2161400	0	0	0	2161400	0	1	1
SPAC18G6.03|ypt3|I|GTPase	SPAC18G6.03|ypt3|I|GTPase	2	2	2	>SPAC18G6.03|ypt3|I|GTPase Ypt3	1	2	2	2	0	0	2	0	0	0	2	0	0	0	2	0	8.4	8.4	8.4	23.861	214	214	0.0023603	2.5241	By matching	By matching	By MS/MS	By matching	0	0	8.4	0	2730200	0	0	2730200	0	0	0	2261500	0	0	0	2
SPAC18G6.04c|shm2|I|serine	SPAC18G6.04c|shm2|I|serine	8	7	7	>SPAC18G6.04c|shm2|I|serine hydroxymethyltransferase Shm2 (predicted)	1	8	7	7	8	7	7	4	7	6	7	3	7	6	7	3	20.9	19.1	19.1	53.978	488	488	0	30.135	By MS/MS	By MS/MS	By MS/MS	By MS/MS	20.9	18.4	19.1	11.7	120740000	45169000	22171000	37467000	15928000	30786000	19455000	27573000	26055000	5	6	6
SPAC18G6.05c|gcn1|I|translation	SPAC18G6.05c|gcn1|I|translation	27	27	27	>SPAC18G6.05c|gcn1|I|translation elongation regulator Gcn1 (predicted)	1	27	27	27	24	20	20	18	24	20	20	18	24	20	20	18	13.1	13.1	13.1	297.33	2670	2670	0	73.118	By MS/MS	By MS/MS	By MS/MS	By MS/MS	11.9	9.7	10.1	8.6	302470000	79657000	75511000	73011000	74288000	67285000	59113000	57402000	83181000	19	12	12
SPAC18G6.14c|rps7|I|40S	SPAC18G6.14c|rps7|I|40S	9	9	9	>SPAC18G6.14c|rps7|I|40S ribosomal protein S7 (predicted)	1	9	9	9	7	8	7	7	7	8	7	7	7	8	7	7	59.5	59.5	59.5	21.947	195	195	0	58.475	By MS/MS	By MS/MS	By MS/MS	By MS/MS	40	47.2	51.8	52.3	392650000	107400000	107790000	97623000	79840000	87285000	84237000	80360000	92316000	9	7	7
SPAC1952.06c|SPAC1952.06c|I|spliceosomal	SPAC1952.06c|SPAC1952.06c|I|spliceosomal	1	1	1	>SPAC1952.06c|SPAC1952.06c|I|spliceosomal complex subunit (predicted)	1	1	1	1	1	1	1	1	1	1	1	1	1	1	1	1	1.2	1.2	1.2	64.589	564	564	0.0090703	2.1526	By MS/MS	By MS/MS	By MS/MS	By MS/MS	1.2	1.2	1.2	1.2	6952800	0	3848000	0	3104900	0	0	0	3104900	1	1	1
SPAC1952.09c|SPAC1952.09c|I|acetyl-CoA	SPAC1952.09c|SPAC1952.09c|I|acetyl-CoA	2	2	2	>SPAC1952.09c|SPAC1952.09c|I|acetyl-CoA hydrolase (predicted)	1	2	2	2	1	2	1	1	1	2	1	1	1	2	1	1	5.8	5.8	5.8	57.915	521	521	0	8.2547	By MS/MS	By MS/MS	By matching	By MS/MS	3.1	5.8	3.1	3.1	18383000	2308900	6584800	4505400	4983700	0	5761800	0	0	0	2	0
SPAC1952.11c|ure2|I|ATP-independent,	SPAC1952.11c|ure2|I|ATP-independent,	10	10	10	>SPAC1952.11c|ure2|I|ATP-independent, nickel dependent urease Ure2	1	10	10	10	8	5	6	5	8	5	6	5	8	5	6	5	16.9	16.9	16.9	91.181	835	835	0	32.695	By MS/MS	By MS/MS	By MS/MS	By MS/MS	13.7	8.9	10.4	9.3	172820000	60792000	30866000	49193000	31972000	36512000	38142000	36660000	38891000	7	3	4
SPAC1952.16|rga9|I|RhoGAP,	SPAC1952.16|rga9|I|RhoGAP,	1	1	1	>SPAC1952.16|rga9|I|RhoGAP, GTPase activator towards Rho/Rac/Cdc42-like small GTPases (predicted)	1	1	1	1	1	0	1	1	1	0	1	1	1	0	1	1	1.8	1.8	1.8	76.867	670	670	0	3.9497	By MS/MS	By matching	By MS/MS	By MS/MS	1.8	0	1.8	1.8	2389600	922060	0	0	1467600	0	0	0	1467600	0	0	2
SPAC19A8.04|erg5|I|C-22	SPAC19A8.04|erg5|I|C-22	22	22	22	>SPAC19A8.04|erg5|I|C-22 sterol desaturase Erg5	1	22	22	22	20	17	18	15	20	17	18	15	20	17	18	15	46	46	46	62.27	543	543	0	127.05	By MS/MS	By MS/MS	By MS/MS	By MS/MS	40.9	36.8	35.9	33.1	540100000	151480000	139860000	146620000	102150000	101540000	113830000	107000000	120300000	17	14	12
SPAC19A8.06|SPAC19A8.06|I|short	SPAC19A8.06|SPAC19A8.06|I|short	1	1	1	>SPAC19A8.06|SPAC19A8.06|I|short chain dehydrogenase (predicted)	1	1	1	1	1	1	1	1	1	1	1	1	1	1	1	1	3.3	3.3	3.3	45.226	397	397	0.0023885	2.6263	By MS/MS	By MS/MS	By matching	By MS/MS	3.3	3.3	3.3	3.3	6059500	1634800	1104800	1910200	1409700	0	0	0	1409700	0	1	0
SPAC19A8.15|trp2|I|tryptophan	SPAC19A8.15|trp2|I|tryptophan	16	16	16	>SPAC19A8.15|trp2|I|tryptophan synthase (predicted)	1	16	16	16	13	15	13	13	13	15	13	13	13	15	13	13	30.4	30.4	30.4	75.436	697	697	0	111.09	By MS/MS	By MS/MS	By MS/MS	By MS/MS	25.3	30.3	23.1	24.8	515490000	137350000	163290000	86608000	128250000	105210000	134140000	89224000	128330000	13	14	11
SPAC19B12.03|bgs3|I|1,3-beta-glucan	SPAC19B12.03|bgs3|I|1,3-beta-glucan	6	6	6	>SPAC19B12.03|bgs3|I|1,3-beta-glucan synthase subunit Bgs3	1	6	6	6	3	6	3	5	3	6	3	5	3	6	3	5	3.5	3.5	3.5	210.83	1826	1826	0	14.034	By MS/MS	By MS/MS	By MS/MS	By MS/MS	1.5	3.5	1.8	2.7	48799000	4318900	19805000	4980000	19696000	9772000	11912000	10762000	12291000	3	6	3
SPAC19B12.06c|rbd4|I|rhomboid	SPAC19B12.06c|rbd4|I|rhomboid	1	1	1	>SPAC19B12.06c|rbd4|I|rhomboid family protease associated with COP1 coated vesicle (predicted)	1	1	1	1	1	1	1	1	1	1	1	1	1	1	1	1	3.5	3.5	3.5	28.593	258	258	0	5.262	By MS/MS	By MS/MS	By MS/MS	By MS/MS	3.5	3.5	3.5	3.5	29818000	6986100	7500900	6726900	8604200	0	0	0	8604200	0	0	0
SPAC19G12.05|mce1|I|mitochondrial	SPAC19G12.05|mce1|I|mitochondrial	3	3	3	>SPAC19G12.05|mce1|I|mitochondrial citrate transmembrane transporter (predicted)	1	3	3	3	2	3	1	2	2	3	1	2	2	3	1	2	5.8	5.8	5.8	31.573	291	291	0	5.1641	By MS/MS	By MS/MS	By MS/MS	By MS/MS	5.5	5.8	2.7	3.1	7432500	1218700	2187100	1409700	2617000	0	0	0	2617000	2	1	1
SPAC19G12.07c|rsd1|I|RNA-binding	SPAC19G12.07c|rsd1|I|RNA-binding	3	3	3	>SPAC19G12.07c|rsd1|I|RNA-binding protein Rsd1 (predicted)	1	3	3	3	3	2	2	1	3	2	2	1	3	2	2	1	6.8	6.8	6.8	69.362	603	603	0	7.8818	By MS/MS	By MS/MS	By matching	By matching	6.8	4	5.5	2.7	30399000	10011000	7613400	8610500	4163600	8312600	0	0	0	1	1	0
SPAC19G12.08|scs7|I|sphingosine	SPAC19G12.08|scs7|I|sphingosine	9	9	9	>SPAC19G12.08|scs7|I|sphingosine hydroxylase Scs7	1	9	9	9	7	8	8	9	7	8	8	9	7	8	8	9	37.5	37.5	37.5	40.229	347	347	0	70.787	By MS/MS	By MS/MS	By MS/MS	By MS/MS	30.8	32.6	28.5	37.5	347660000	93015000	84762000	90283000	79599000	72396000	83631000	81221000	66304000	3	8	5
SPAC19G12.09|SPAC19G12.09|I|NADH/NADPH	SPAC19G12.09|SPAC19G12.09|I|NADH/NADPH	3	3	3	>SPAC19G12.09|SPAC19G12.09|I|NADH/NADPH dependent indole-3-acetaldehyde reductase	1	3	3	3	2	1	0	2	2	1	0	2	2	1	0	2	15.1	15.1	15.1	31.569	284	284	0	13.59	By MS/MS	By MS/MS	By matching	By MS/MS	10.9	7	0	11.3	3249400	0	0	0	3249400	0	0	0	3249400	2	1	0
SPAC19G12.10c|cpy1|I|vacuolar	SPAC19G12.10c|cpy1|I|vacuolar	18	18	18	>SPAC19G12.10c|cpy1|I|vacuolar carboxypeptidase Y	1	18	18	18	16	15	17	8	16	15	17	8	16	15	17	8	21	21	21	114.24	1002	1002	0	109.68	By MS/MS	By MS/MS	By MS/MS	By MS/MS	18.6	17.4	19.5	10.7	666590000	193970000	169300000	228200000	75121000	127460000	146140000	146750000	153000000	14	13	20
SPAC19G12.15c|tpp1|I|trehalose-6-phosphate	SPAC19G12.15c|tpp1|I|trehalose-6-phosphate	7	7	7	>SPAC19G12.15c|tpp1|I|trehalose-6-phosphate phosphatase Tpp1	1	7	7	7	5	5	4	5	5	5	4	5	5	5	4	5	12	12	12	93.876	817	817	0	22.367	By MS/MS	By MS/MS	By MS/MS	By MS/MS	8.4	8.9	7	8.6	98840000	29527000	25193000	21182000	22939000	19549000	23421000	20047000	24028000	5	4	3
SPAC1A6.04c|plb1|I|phospholipase	SPAC1A6.04c|plb1|I|phospholipase	3	3	3	>SPAC1A6.04c|plb1|I|phospholipase B homolog Plb1	1	3	3	3	1	3	1	2	1	3	1	2	1	3	1	2	4.7	4.7	4.7	67.118	613	613	0	13.206	By MS/MS	By MS/MS	By MS/MS	By MS/MS	1.5	4.7	1.5	2.6	47468000	9992000	12831000	9357300	15288000	0	0	0	15288000	1	3	1
SPAC1A6.10|tcd1|I|tRNA	SPAC1A6.10|tcd1|I|tRNA	2	2	2	>SPAC1A6.10|tcd1|I|tRNA threonylcarbamoyladenosine dehydratase Tcd1 (predicted)	1	2	2	2	1	0	2	0	1	0	2	0	1	0	2	0	5.4	5.4	5.4	54.299	485	485	0	4.7081	By matching	By matching	By MS/MS	By matching	2.1	0	5.4	0	8128700	2209300	0	5919400	0	0	0	4903200	0	0	0	2
SPAC1B1.02c|SPAC1B1.02c|I|NAD/NADH	SPAC1B1.02c|SPAC1B1.02c|I|NAD/NADH	11	11	11	>SPAC1B1.02c|SPAC1B1.02c|I|NAD/NADH kinase (predicted)	1	11	11	11	10	9	9	8	10	9	9	8	10	9	9	8	25.3	25.3	25.3	60.708	537	537	0	41.376	By MS/MS	By MS/MS	By MS/MS	By MS/MS	21.8	19.6	21.8	21.8	165350000	53573000	40613000	35051000	36108000	42381000	33669000	32534000	36579000	11	9	8
SPAC1B2.03c|SPAC1B2.03c|I|GNS1/SUR4	SPAC1B2.03c|SPAC1B2.03c|I|GNS1/SUR4	4	4	4	>SPAC1B2.03c|SPAC1B2.03c|I|GNS1/SUR4 family protein (predicted)	1	4	4	4	4	3	4	3	4	3	4	3	4	3	4	3	24	24	24	38.337	334	334	0	98.836	By MS/MS	By MS/MS	By MS/MS	By MS/MS	24	16.8	24	16.8	328020000	84227000	81610000	89262000	72926000	61934000	78348000	67634000	76458000	5	4	6
SPAC1B3.01c|SPAC1B3.01c|I|uracil	SPAC1B3.01c|SPAC1B3.01c|I|uracil	1	1	1	>SPAC1B3.01c|SPAC1B3.01c|I|uracil phosphoribosyltransferase (predicted)	1	1	1	1	1	1	1	0	1	1	1	0	1	1	1	0	4.1	4.1	4.1	24.466	219	219	0	3.198	By MS/MS	By MS/MS	By MS/MS	By matching	4.1	4.1	4.1	0	4752300	2696200	2056200	0	0	0	1799200	0	0	1	1	1
SPAC1B3.03c|wis2|I|cyclophilin	SPAC1B3.03c|wis2|I|cyclophilin	5	5	5	>SPAC1B3.03c|wis2|I|cyclophilin family peptidyl-prolyl cis-trans isomerase Wis2	1	5	5	5	4	2	2	1	4	2	2	1	4	2	2	1	19.1	19.1	19.1	40.161	356	356	0	34.037	By MS/MS	By MS/MS	By MS/MS	By matching	14.3	7.3	7.3	2.5	21146000	17904000	1965000	0	1277500	14866000	0	0	0	3	1	2
SPAC1B3.13|nan1|I|U3	SPAC1B3.13|nan1|I|U3	11	11	11	>SPAC1B3.13|nan1|I|U3 snoRNP-associated protein Nan1 (predicted)	1	11	11	11	9	9	9	7	9	9	9	7	9	9	9	7	19.5	19.5	19.5	88.937	806	806	0	50.339	By MS/MS	By MS/MS	By MS/MS	By MS/MS	15.5	15.1	15.4	11.3	197240000	43083000	56267000	55070000	42816000	34600000	43154000	40344000	55342000	5	8	5
SPAC1B3.14|vma3|I|V-type	SPAC1B3.14|vma3|I|V-type	1	1	1	>SPAC1B3.14|vma3|I|V-type ATPase V0 subunit c (proteolipid subunit)	1	1	1	1	1	1	1	1	1	1	1	1	1	1	1	1	11.2	11.2	11.2	16.325	161	161	0	4.8268	By MS/MS	By MS/MS	By MS/MS	By MS/MS	11.2	11.2	11.2	11.2	84302000	23397000	22555000	17745000	20604000	0	0	0	16313000	2	1	2
SPAC1B3.16c|vht1|I|vitamin	SPAC1B3.16c|vht1|I|vitamin	3	3	3	>SPAC1B3.16c|vht1|I|vitamin H transmembrane transporter Vht1	1	3	3	3	2	3	2	2	2	3	2	2	2	3	2	2	6.5	6.5	6.5	62.821	568	568	0	24.026	By MS/MS	By MS/MS	By MS/MS	By MS/MS	3.3	6.5	3.3	3.3	58529000	17106000	19307000	10264000	11852000	12515000	17625000	8953900	12358000	1	3	1
SPAC1D4.04|cct2|I|chaperonin-containing	SPAC1D4.04|cct2|I|chaperonin-containing	11	11	11	>SPAC1D4.04|cct2|I|chaperonin-containing T-complex beta subunit Cct2	1	11	11	11	10	9	8	9	10	9	8	9	10	9	8	9	29.4	29.4	29.4	56.676	527	527	0	49.331	By MS/MS	By MS/MS	By MS/MS	By MS/MS	26.6	24.3	21.8	25	205140000	62496000	44147000	45325000	53176000	41145000	45384000	45924000	46056000	5	8	4
SPAC1D4.08|pis1|I|CDP-diacylglycerol--inositol	SPAC1D4.08|pis1|I|CDP-diacylglycerol--inositol	1	1	1	>SPAC1D4.08|pis1|I|CDP-diacylglycerol--inositol 3-phosphatidyltransferase Pis1 (predicted)	1	1	1	1	1	1	1	1	1	1	1	1	1	1	1	1	7.2	7.2	7.2	26.924	237	237	0	57.093	By MS/MS	By MS/MS	By MS/MS	By MS/MS	7.2	7.2	7.2	7.2	11151000	0	5795500	0	5355700	0	0	0	5355700	1	2	1
SPAC1F12.02c|tma19|I|translationally	SPAC1F12.02c|tma19|I|translationally	1	1	1	>SPAC1F12.02c|tma19|I|translationally controlled tumor protein homolog Tma19/Tpt1	1	1	1	1	1	1	1	0	1	1	1	0	1	1	1	0	9.5	9.5	9.5	19.048	168	168	0	3.2134	By MS/MS	By matching	By matching	By matching	9.5	9.5	9.5	0	23323000	7212900	9914700	6195300	0	0	0	5131800	0	1	0	0
SPAC1F12.07|ser1|I|phosphoserine	SPAC1F12.07|ser1|I|phosphoserine	10	10	10	>SPAC1F12.07|ser1|I|phosphoserine aminotransferase (predicted)	1	10	10	10	8	8	8	8	8	8	8	8	8	8	8	8	32.6	32.6	32.6	42.797	389	389	0	43.451	By MS/MS	By MS/MS	By MS/MS	By MS/MS	26.5	26.2	26.5	26.2	263240000	52664000	99697000	44320000	66554000	48829000	83607000	40479000	61316000	7	7	4
SPAC1F3.02c|mkh1|I|MEK	SPAC1F3.02c|mkh1|I|MEK	2	2	2	>SPAC1F3.02c|mkh1|I|MEK kinase (MEKK) Mkh1	1	2	2	2	0	1	1	1	0	1	1	1	0	1	1	1	1.5	1.5	1.5	125.13	1116	1116	0.0083714	2.2211	By matching	By matching	By MS/MS	By MS/MS	0	0.7	0.8	0.7	2996100	0	875410	0	2120700	0	0	0	2120700	0	0	1
SPAC1F3.06c|spo15|I|mitotic	SPAC1F3.06c|spo15|I|mitotic	15	15	15	>SPAC1F3.06c|spo15|I|mitotic and mieotic spindle pole body protein Spo15	1	15	15	15	13	8	12	8	13	8	12	8	13	8	12	8	10.1	10.1	10.1	222.78	1957	1957	0	77.859	By MS/MS	By MS/MS	By MS/MS	By MS/MS	8.7	5.5	7.9	5.3	205820000	77647000	30665000	70241000	27268000	45821000	38635000	43139000	49160000	12	7	8
SPAC1F3.09|mug161|I|CwfJ	SPAC1F3.09|mug161|I|CwfJ	5	5	5	>SPAC1F3.09|mug161|I|CwfJ family protein, splicing factor (predicted)	1	5	5	5	4	5	5	3	4	5	5	3	4	5	5	3	13.5	13.5	13.5	63.216	561	561	0	50.714	By MS/MS	By MS/MS	By MS/MS	By MS/MS	11.2	13.5	13.5	7.5	123680000	30241000	41213000	27943000	24285000	24842000	22645000	22895000	38221000	5	5	5
SPAC1F5.02|pdi1|I|protein	SPAC1F5.02|pdi1|I|protein	6	6	6	>SPAC1F5.02|pdi1|I|protein disulfide isomerase (predicted)	1	6	6	6	6	4	4	4	6	4	4	4	6	4	4	4	13.4	13.4	13.4	54.88	492	492	0	15.396	By MS/MS	By MS/MS	By MS/MS	By MS/MS	13.4	9.3	8.5	9.3	81718000	24832000	18168000	18553000	20166000	19016000	17126000	14855000	21053000	4	2	1
SPAC1F5.03c|SPAC1F5.03c|I|FAD-dependent	SPAC1F5.03c|SPAC1F5.03c|I|FAD-dependent	1	1	1	>SPAC1F5.03c|SPAC1F5.03c|I|FAD-dependent oxidoreductase involved in late endosome to Golgi transport (predicted)	1	1	1	1	1	1	1	1	1	1	1	1	1	1	1	1	3.4	3.4	3.4	41.501	382	382	0	3.4172	By matching	By matching	By matching	By MS/MS	3.4	3.4	3.4	3.4	14895000	3866700	4505000	2111000	4412000	0	0	0	4412000	0	0	0
SPAC1F5.06|lsh1|I|ER	SPAC1F5.06|lsh1|I|ER	3	3	3	>SPAC1F5.06|lsh1|I|ER heat shock protein Lsh1 (predicted)	1	3	3	3	2	3	1	1	2	3	1	1	2	3	1	1	4.7	4.7	4.7	94.897	848	848	0	12.237	By MS/MS	By MS/MS	By MS/MS	By matching	3.7	4.7	1.1	1.1	11728000	2683700	4192400	2859600	1992900	0	3668400	0	0	2	1	1
SPAC1F5.11c|tra2|I|NuA4	SPAC1F5.11c|tra2|I|NuA4	51	49	49	>SPAC1F5.11c|tra2|I|NuA4 complex phosphatidylinositol pseudokinase complex subunit Tra2	1	51	49	49	45	34	42	35	43	33	40	34	43	33	40	34	15.8	15.4	15.4	420.78	3655	3655	0	230.08	By MS/MS	By MS/MS	By MS/MS	By MS/MS	13.3	10	13.2	10.4	630700000	176430000	142490000	179300000	132480000	142540000	135650000	129550000	133440000	36	28	31
SPAC1F7.04|rho1|I|Rho;SPAC20H4.11c|rho5|I|Rho	SPAC1F7.04|rho1|I|Rho	5;2	5;2	5;2	>SPAC1F7.04|rho1|I|Rho family GTPase Rho1	2	5	5	5	2	3	4	2	2	3	4	2	2	3	4	2	36.6	36.6	36.6	22.523	202	202;200	0	23.188	By MS/MS	By MS/MS	By MS/MS	By MS/MS	16.8	24.8	24.8	16.3	59582000	12267000	17248000	19300000	10768000	11129000	0	15043000	0	1	3	4
SPAC1F7.05|cdc22|I|ribonucleoside	SPAC1F7.05|cdc22|I|ribonucleoside	11	11	11	>SPAC1F7.05|cdc22|I|ribonucleoside reductase large subunit Cdc22	1	11	11	11	9	8	8	5	9	8	8	5	9	8	8	5	18.2	18.2	18.2	91.998	811	811	0	99.349	By MS/MS	By MS/MS	By MS/MS	By MS/MS	15.7	12.9	13.8	9.2	257420000	77147000	67275000	68679000	44316000	54067000	54851000	50378000	64833000	7	7	9
SPAC1F7.07c|fip1|I|iron	SPAC1F7.07c|fip1|I|iron	1	1	1	>SPAC1F7.07c|fip1|I|iron permease Fip1	1	1	1	1	1	0	1	0	1	0	1	0	1	0	1	0	2.3	2.3	2.3	44.314	397	397	0.00082576	3.0831	By MS/MS	By matching	By MS/MS	By matching	2.3	0	2.3	0	15080000	0	0	15080000	0	0	0	12491000	0	1	0	1
SPAC1F7.08|fio1|I|iron	SPAC1F7.08|fio1|I|iron	4	4	4	>SPAC1F7.08|fio1|I|iron transport multicopper oxidase Fio1	1	4	4	4	4	3	4	3	4	3	4	3	4	3	4	3	8.2	8.2	8.2	69.907	622	622	0	85.346	By MS/MS	By MS/MS	By MS/MS	By MS/MS	8.2	5.5	8.2	5.5	104750000	30625000	22579000	28137000	23412000	26086000	19418000	22684000	23717000	5	3	4
SPAC1F7.12|yak3|I|aldose	SPAC1F7.12|yak3|I|aldose	2	2	2	>SPAC1F7.12|yak3|I|aldose reductase ARK13 family YakC	1	2	2	2	1	0	1	0	1	0	1	0	1	0	1	0	6.2	6.2	6.2	37.71	340	340	0	3.5239	By MS/MS	By matching	By MS/MS	By matching	3.8	0	2.4	0	0	0	0	0	0	0	0	0	0	1	0	1
SPBC839.04|rpl803|II|60S;SPBC2F12.07c|rpl802|II|60S;SPAC1F7.13c|rpl801|I|60S	SPBC839.04|rpl803|II|60S;SPBC2F12.07c|rpl802|II|60S;SPAC1F7.13c|rpl801|I|60S	7;7;7	7;7;7	7;7;7	>SPBC839.04|rpl803|II|60S ribosomal protein L8 (predicted);>SPBC2F12.07c|rpl802|II|60S ribosomal protein L8 (predicted);>SPAC1F7.13c|rpl801|I|60S ribosomal protein L8 (predicted)	3	7	7	7	7	7	7	7	7	7	7	7	7	7	7	7	39.5	39.5	39.5	27.1	253	253;253;253	0	94.49	By MS/MS	By MS/MS	By MS/MS	By MS/MS	39.5	39.5	39.5	39.5	1228500000	313320000	311740000	329700000	273760000	237170000	292720000	255430000	287010000	12	9	12
SPAC1F8.07c|pdc101|I|pyruvate	SPAC1F8.07c|pdc101|I|pyruvate	33	33	33	>SPAC1F8.07c|pdc101|I|pyruvate decarboxylase (predicted)	1	33	33	33	30	33	30	30	30	33	30	30	30	33	30	30	63.9	63.9	63.9	61.547	568	568	0	323.31	By MS/MS	By MS/MS	By MS/MS	By MS/MS	59.3	63.9	59.3	59.3	12726000000	3705300000	3396000000	3268500000	2356500000	2519900000	2590800000	2292000000	2407800000	68	67	67
SPAC20G4.06c|adf1|I|actin	SPAC20G4.06c|adf1|I|actin	1	1	1	>SPAC20G4.06c|adf1|I|actin depolymerizing factor, cofilin	1	1	1	1	1	0	1	0	1	0	1	0	1	0	1	0	10.2	10.2	10.2	15.62	137	137	0	3.6696	By MS/MS	By matching	By MS/MS	By matching	10.2	0	10.2	0	15192000	8526800	0	6665100	0	0	0	5520900	0	1	0	1
SPAC20G4.07c|erg4|I|C-24(28)	SPAC20G4.07c|erg4|I|C-24(28)	1	1	1	>SPAC20G4.07c|erg4|I|C-24(28) sterol reductase Erg4	1	1	1	1	1	1	1	1	1	1	1	1	1	1	1	1	2.4	2.4	2.4	52.545	453	453	0	3.389	By MS/MS	By MS/MS	By MS/MS	By MS/MS	2.4	2.4	2.4	2.4	13248000	3878200	3736300	2370200	3263700	0	0	0	3263700	1	1	1
SPAC20G4.08|pdc1|I|mRNA	SPAC20G4.08|pdc1|I|mRNA	1	1	1	>SPAC20G4.08|pdc1|I|mRNA decapping scaffolding protein	1	1	1	1	0	0	1	1	0	0	1	1	0	0	1	1	1.5	1.5	1.5	119.23	1076	1076	0	3.681	By matching	By matching	By matching	By MS/MS	0	0	1.5	1.5	5615900	0	0	1953200	3662600	0	0	0	3662600	0	0	0
SPAC20G8.03|itr2|I|MFS	SPAC20G8.03|itr2|I|MFS	3	3	3	>SPAC20G8.03|itr2|I|MFS myo-inositol transmembrane transporter	1	3	3	3	2	1	1	2	2	1	1	2	2	1	1	2	3.4	3.4	3.4	61.136	557	557	0	9.2692	By MS/MS	By MS/MS	By MS/MS	By MS/MS	3.2	1.6	1.6	1.8	24646000	9782300	6501200	4392300	3970200	8122500	0	0	0	2	1	1
SPAC20G8.05c|cdc15|I|extended	SPAC20G8.05c|cdc15|I|extended	1	1	1	>SPAC20G8.05c|cdc15|I|extended Fer/CIP4 (EFC) domain protein Cdc15	1	1	1	1	1	0	1	1	1	0	1	1	1	0	1	1	1.4	1.4	1.4	102.12	927	927	0	3.1175	By MS/MS	By matching	By matching	By matching	1.4	0	1.4	1.4	8454000	2909500	0	3076000	2468500	0	0	0	2468500	1	0	0
SPAC20G8.06|not1|I|CCR4-Not	SPAC20G8.06|not1|I|CCR4-Not	28	28	28	>SPAC20G8.06|not1|I|CCR4-Not complex subunit Not1 (predicted)	1	28	28	28	21	19	21	17	21	19	21	17	21	19	21	17	18.6	18.6	18.6	237.13	2100	2100	0	105.26	By MS/MS	By MS/MS	By MS/MS	By MS/MS	12.9	10.6	13	11	314550000	75833000	72401000	89733000	76582000	61555000	70574000	60537000	79435000	16	15	16
SPAC20G8.07c|erg2|I|C-8	SPAC20G8.07c|erg2|I|C-8	4	4	4	>SPAC20G8.07c|erg2|I|C-8 sterol isomerase Erg2	1	4	4	4	4	3	3	3	4	3	3	3	4	3	3	3	17.4	17.4	17.4	24.671	219	219	0	17.374	By MS/MS	By MS/MS	By MS/MS	By MS/MS	17.4	11.9	13.7	11.9	101190000	27416000	27510000	32328000	13939000	22792000	23915000	21321000	19525000	2	3	2
SPAC20G8.09c|nat10|I|ribosome	SPAC20G8.09c|nat10|I|ribosome	1	1	1	>SPAC20G8.09c|nat10|I|ribosome biogenesis ATPase	1	1	1	1	0	0	0	1	0	0	0	1	0	0	0	1	2.3	2.3	2.3	116.46	1033	1033	0.00081566	2.9326	By matching	By matching	By matching	By MS/MS	0	0	0	2.3	0	0	0	0	0	0	0	0	0	0	0	0
SPAC20G8.10c|atg6|I|autophagy	SPAC20G8.10c|atg6|I|autophagy	1	1	1	>SPAC20G8.10c|atg6|I|autophagy associated beclin family protein Atg6	1	1	1	1	1	1	0	0	1	1	0	0	1	1	0	0	3	3	3	53.959	464	464	0.0039124	2.4467	By MS/MS	By MS/MS	By matching	By matching	3	3	0	0	2491900	2491900	0	0	0	2069100	0	0	0	1	1	0
SPAC20H4.10|ufd2|I|ubiquitin-protein	SPAC20H4.10|ufd2|I|ubiquitin-protein	1	1	1	>SPAC20H4.10|ufd2|I|ubiquitin-protein ligase E4 Ufd2 (predicted)	1	1	1	1	1	1	1	0	1	1	1	0	1	1	1	0	1	1	1	115.28	1010	1010	0.0083841	2.2255	By matching	By MS/MS	By matching	By matching	1	1	1	0	5396700	1284300	1342600	2769800	0	0	0	2294300	0	0	0	0
SPAC750.07c|SPAC750.07c|I|S.;SPAC212.12|SPAC212.12|I|S.;SPAC212.08c|SPAC212.08c|I|S.	SPAC750.07c|SPAC750.07c|I|S.;SPAC212.12|SPAC212.12|I|S.;SPAC212.08c|SPAC212.08c|I|S.	1;1;1	1;1;1	1;1;1	>SPAC750.07c|SPAC750.07c|I|S. pombe specific protein;>SPAC212.12|SPAC212.12|I|S. pombe specific GPI anchored protein family 1;>SPAC212.08c|SPAC212.08c|I|S. pombe specific GPI anchored protein family 1	3	1	1	1	0	0	1	0	0	0	1	0	0	0	1	0	11.4	11.4	11.4	13.128	123	123;123;278	0.0024038	2.7201	By matching	By matching	By MS/MS	By matching	0	0	11.4	0	3174200	0	0	3174200	0	0	0	2629300	0	0	0	1
SPAC21E11.08|lcb2|I|serine	SPAC21E11.08|lcb2|I|serine	2	2	2	>SPAC21E11.08|lcb2|I|serine palmitoyltransferase Lcb2 (predicted)	1	2	2	2	2	2	2	2	2	2	2	2	2	2	2	2	6.3	6.3	6.3	67.518	603	603	0	5.2116	By MS/MS	By matching	By MS/MS	By matching	6.3	6.3	6.3	6.3	50535000	10061000	13263000	11825000	15385000	0	0	0	15385000	0	0	1
SPAC222.07c|hri2|I|eIF2	SPAC222.07c|hri2|I|eIF2	13	13	13	>SPAC222.07c|hri2|I|eIF2 alpha kinase Hri2	1	13	13	13	13	9	11	9	13	9	11	9	13	9	11	9	25.4	25.4	25.4	73.366	639	639	0	54.772	By MS/MS	By MS/MS	By MS/MS	By MS/MS	25.4	16	20.5	18.8	241890000	73213000	45505000	65033000	58136000	50652000	43722000	54109000	64132000	9	4	6
SPAC222.11|hem13|I|coproporphyrinogen	SPAC222.11|hem13|I|coproporphyrinogen	8	8	8	>SPAC222.11|hem13|I|coproporphyrinogen III oxidase Hem13 (predicted)	1	8	8	8	7	7	5	5	7	7	5	5	7	7	5	5	39.1	39.1	39.1	36.244	312	312	0	40.18	By MS/MS	By MS/MS	By MS/MS	By MS/MS	32.7	35.9	25.3	23.7	99676000	25985000	42784000	10215000	20692000	23813000	25004000	13069000	26281000	7	9	3
SPAC222.12c|atp2|I|F1-ATPase	SPAC222.12c|atp2|I|F1-ATPase	12	12	12	>SPAC222.12c|atp2|I|F1-ATPase beta subunit Atp2	1	12	12	12	11	9	10	9	11	9	10	9	11	9	10	9	35.4	35.4	35.4	56.875	525	525	0	99.446	By MS/MS	By MS/MS	By MS/MS	By MS/MS	32.6	27.4	30.1	26.1	302100000	85252000	68307000	86668000	61877000	64185000	69193000	57635000	73210000	7	8	10
SPAC222.13c|SPAC222.13c|I|6-phosphofructo-2-kinase	SPAC222.13c|SPAC222.13c|I|6-phosphofructo-2-kinase	2	2	2	>SPAC222.13c|SPAC222.13c|I|6-phosphofructo-2-kinase (predicted)	1	2	2	2	2	1	1	1	2	1	1	1	2	1	1	1	4.2	4.2	4.2	68.639	592	592	0	4.6526	By MS/MS	By MS/MS	By matching	By MS/MS	4.2	2.5	2.5	2.5	10989000	4085400	2327400	2520700	2055000	3392200	0	0	0	2	1	0
SPAC222.14c|sey1|I|GTP	SPAC222.14c|sey1|I|GTP	5	5	5	>SPAC222.14c|sey1|I|GTP binding protein Sey1 (predicted)	1	5	5	5	2	3	4	2	2	3	4	2	2	3	4	2	6.2	6.2	6.2	87.509	762	762	0	9.3596	By MS/MS	By MS/MS	By MS/MS	By MS/MS	2	3	5.1	2	18829000	4142100	4299800	5462300	4924800	0	0	4524600	0	1	2	3
SPAC227.06|yip5|I|Rab	SPAC227.06|yip5|I|Rab	1	1	1	>SPAC227.06|yip5|I|Rab GTPase binding Yip5 (predicted)	1	1	1	1	0	0	1	0	0	0	1	0	0	0	1	0	4	4	4	27.931	249	249	0.0097598	2.0915	By matching	By matching	By MS/MS	By matching	0	0	4	0	0	0	0	0	0	0	0	0	0	0	0	1
SPAC227.07c|pab1|I|protein	SPAC227.07c|pab1|I|protein	3	3	3	>SPAC227.07c|pab1|I|protein phosphatase PP2A regulatory subunit B-55 Pab1	1	3	3	3	2	3	3	3	2	3	3	3	2	3	3	3	8.6	8.6	8.6	52.795	463	463	0	11.618	By MS/MS	By MS/MS	By MS/MS	By MS/MS	5.2	8.6	8.6	8.6	39789000	6248100	12388000	9421300	11732000	7755700	9270700	6918500	11618000	3	2	2
SPAC227.18|lys3|I|saccharopine	SPAC227.18|lys3|I|saccharopine	8	8	8	>SPAC227.18|lys3|I|saccharopine dehydrogenase Lys3	1	8	8	8	6	8	6	6	6	8	6	6	6	8	6	6	28.8	28.8	28.8	41.392	368	368	0	32.801	By MS/MS	By MS/MS	By MS/MS	By MS/MS	20.1	28.8	20.1	20.7	327460000	80828000	93323000	68084000	85223000	70391000	86158000	56938000	76904000	6	8	5
SPAC5D6.01|rps2202|I|40S;SPAC22A12.04c|rps2201|I|40S	SPAC5D6.01|rps2202|I|40S;SPAC22A12.04c|rps2201|I|40S	5;5	5;5	5;5	>SPAC5D6.01|rps2202|I|40S ribosomal protein S15a (predicted);>SPAC22A12.04c|rps2201|I|40S ribosomal protein S15a (predicted)	2	5	5	5	5	5	4	3	5	5	4	3	5	5	4	3	44.6	44.6	44.6	14.76	130	130;130	0	46.118	By MS/MS	By MS/MS	By MS/MS	By MS/MS	44.6	44.6	32.3	21.5	319180000	86322000	98640000	83823000	50393000	62899000	68730000	68817000	77367000	4	3	3
SPAC22A12.07c|ogm1|I|protein	SPAC22A12.07c|ogm1|I|protein	16	16	16	>SPAC22A12.07c|ogm1|I|protein O-mannosyltransferase Ogm1	1	16	16	16	11	14	13	12	11	14	13	12	11	14	13	12	24.4	24.4	24.4	101.33	893	893	0	118.96	By MS/MS	By MS/MS	By MS/MS	By MS/MS	17.4	21.5	20.2	16.6	532610000	127390000	129070000	166920000	109230000	110240000	101270000	133520000	121190000	11	11	13
SPAC22A12.10|ept1|I|diacylglycerol	SPAC22A12.10|ept1|I|diacylglycerol	4	4	4	>SPAC22A12.10|ept1|I|diacylglycerol cholinephosphotransferase/ diacylglycerol ethanolaminesphotransferase Ept1 (predicted)	1	4	4	4	4	4	4	4	4	4	4	4	4	4	4	4	11.4	11.4	11.4	44.083	386	386	0	30.844	By MS/MS	By MS/MS	By MS/MS	By MS/MS	11.4	11.4	11.4	11.4	108140000	28105000	28223000	30068000	21744000	22082000	23990000	24069000	24541000	3	3	2
SPAC22A12.11|dak1|I|dihydroxyacetone	SPAC22A12.11|dak1|I|dihydroxyacetone	9	9	9	>SPAC22A12.11|dak1|I|dihydroxyacetone kinase Dak1	1	9	9	9	6	7	6	7	6	7	6	7	6	7	6	7	23.4	23.4	23.4	62.316	580	580	0	37.15	By MS/MS	By MS/MS	By MS/MS	By MS/MS	16.6	19.8	17.1	19.1	125810000	31700000	40822000	27072000	26215000	25617000	33823000	22132000	29108000	4	7	5
SPAC22A12.15c|bip1|I|ER	SPAC22A12.15c|bip1|I|ER	18	17	17	>SPAC22A12.15c|bip1|I|ER heat shock protein BiP	1	18	17	17	18	15	14	15	17	14	13	14	17	14	13	14	29.1	27.5	27.5	73.226	663	663	0	80.675	By MS/MS	By MS/MS	By MS/MS	By MS/MS	29.1	22.9	24	27.6	405140000	122950000	108860000	92689000	80640000	94262000	96108000	79308000	80555000	16	10	7
SPAC22A12.16|acl2|I|ATP-citrate	SPAC22A12.16|acl2|I|ATP-citrate	10	10	10	>SPAC22A12.16|acl2|I|ATP-citrate synthase subunit 2 (predicted)	1	10	10	10	8	7	9	7	8	7	9	7	8	7	9	7	26	26	26	53.942	492	492	0	49.514	By MS/MS	By MS/MS	By MS/MS	By MS/MS	17.9	17.1	24.4	17.1	169530000	33391000	45894000	43141000	47110000	36922000	39828000	25500000	48477000	8	4	3
SPAC22E12.05c|rer1|I|Rer1	SPAC22E12.05c|rer1|I|Rer1	2	2	2	>SPAC22E12.05c|rer1|I|Rer1 family protein (predicted)	1	2	2	2	1	2	1	1	1	2	1	1	1	2	1	1	9.2	9.2	9.2	22.386	184	184	0	6.6502	By MS/MS	By MS/MS	By MS/MS	By MS/MS	4.9	9.2	4.9	4.3	24153000	5886700	8203200	6161900	3901700	0	7177900	0	0	1	2	1
SPAC22E12.07|rna1|I|Ran	SPAC22E12.07|rna1|I|Ran	3	3	3	>SPAC22E12.07|rna1|I|Ran GAP Rna1	1	3	3	3	3	2	1	1	3	2	1	1	3	2	1	1	7.8	7.8	7.8	43.235	386	386	0	9.2771	By MS/MS	By MS/MS	By MS/MS	By MS/MS	7.8	5.7	2.1	2.1	13660000	6821000	5285600	0	1553400	5663700	0	0	0	1	1	1
SPAC22E12.17c|glo3|I|ARF	SPAC22E12.17c|glo3|I|ARF	2	2	2	>SPAC22E12.17c|glo3|I|ARF GTPase activating protein (predicted)	1	2	2	2	1	0	1	0	1	0	1	0	1	0	1	0	5.4	5.4	5.4	52.583	483	483	0	6.0938	By MS/MS	By matching	By MS/MS	By matching	2.5	0	2.9	0	1300000	1300000	0	0	0	1079400	0	0	0	0	0	1
SPAC22F3.06c|lon1|I|Lon	SPAC22F3.06c|lon1|I|Lon	10	10	10	>SPAC22F3.06c|lon1|I|Lon protease homolog Lon1 (predicted)	1	10	10	10	4	6	3	5	4	6	3	5	4	6	3	5	10.6	10.6	10.6	118.64	1067	1067	0	26.053	By MS/MS	By MS/MS	By MS/MS	By MS/MS	4.7	6.2	3.7	6.7	48955000	12977000	13615000	9549100	12814000	12749000	11025000	9721400	9916300	3	5	1
SPAC22F3.07c|atp20|I|F0-ATPase	SPAC22F3.07c|atp20|I|F0-ATPase	2	2	2	>SPAC22F3.07c|atp20|I|F0-ATPase subunit G (predicted)	1	2	2	2	2	2	2	1	2	2	2	1	2	2	2	1	22	22	22	13.64	118	118	0	8.9624	By MS/MS	By MS/MS	By MS/MS	By MS/MS	22	22	22	12.7	24753000	8186900	5137400	5546200	5883000	0	0	0	5883000	3	2	1
SPAC22F3.10c|gcs1|I|glutamate-cysteine	SPAC22F3.10c|gcs1|I|glutamate-cysteine	6	6	6	>SPAC22F3.10c|gcs1|I|glutamate-cysteine ligase Gcs1	1	6	6	6	3	5	3	5	3	5	3	5	3	5	3	5	11.7	11.7	11.7	76.522	669	669	0	19.182	By MS/MS	By MS/MS	By MS/MS	By MS/MS	5.4	9.7	6.3	8.8	69092000	10786000	23364000	13867000	21075000	11564000	17396000	13751000	19250000	2	5	3
SPAC22F3.13|tsc1|I|hamartin	SPAC22F3.13|tsc1|I|hamartin	7	7	7	>SPAC22F3.13|tsc1|I|hamartin	1	7	7	7	6	4	3	4	6	4	3	4	6	4	3	4	10	10	10	103.43	899	899	0	17.259	By MS/MS	By MS/MS	By MS/MS	By MS/MS	9	4.2	3.7	4.8	48623000	16719000	12207000	9085200	10611000	9591400	8877700	13102000	11130000	4	3	2
SPAC22F8.04|pet1|I|phosphoenolpyruvate	SPAC22F8.04|pet1|I|phosphoenolpyruvate	1	1	1	>SPAC22F8.04|pet1|I|phosphoenolpyruvate transmembrane transporter Pet1	1	1	1	1	1	0	1	0	1	0	1	0	1	0	1	0	4.2	4.2	4.2	42.626	383	383	0	3.8096	By MS/MS	By matching	By MS/MS	By matching	4.2	0	4.2	0	6982100	3663100	0	3319100	0	0	0	2749300	0	1	0	1
SPAC22F8.05|SPAC22F8.05|I|alpha,alpha-trehalose-phosphate	SPAC22F8.05|SPAC22F8.05|I|alpha,alpha-trehalose-phosphate	22	22	22	>SPAC22F8.05|SPAC22F8.05|I|alpha,alpha-trehalose-phosphate synthase (predicted)	1	22	22	22	20	21	20	18	20	21	20	18	20	21	20	18	37.1	37.1	37.1	100.66	891	891	0	188.22	By MS/MS	By MS/MS	By MS/MS	By MS/MS	34.9	36	33.2	31.9	1020600000	227680000	297470000	244660000	250830000	174160000	236150000	203300000	241490000	21	20	15
SPAC22F8.08|sec24|I|COPII	SPAC22F8.08|sec24|I|COPII	13	13	13	>SPAC22F8.08|sec24|I|COPII cargo receptor Sec24/Sfb2 subunit	1	13	13	13	11	8	9	8	11	8	9	8	11	8	9	8	17	17	17	101.9	926	926	0	48.012	By MS/MS	By MS/MS	By MS/MS	By MS/MS	13.5	11	11.7	11.9	213800000	58774000	48190000	52215000	54624000	46417000	45304000	44250000	52874000	8	5	6
SPAC22G7.04|pan2|I|ubiquitin	SPAC22G7.04|pan2|I|ubiquitin	1	1	1	>SPAC22G7.04|pan2|I|ubiquitin C-terminal hydrolase, poly(A)-specific ribonuclease complex subunit Pan2 (predicted)	1	1	1	1	1	1	0	1	1	1	0	1	1	1	0	1	0.8	0.8	0.8	123.87	1088	1088	0.0039062	2.4327	By MS/MS	By MS/MS	By matching	By MS/MS	0.8	0.8	0	0.8	1440000	1440000	0	0	0	1195700	0	0	0	1	1	0
SPAC22G7.06c|ura1|I|carbamoyl-phosphate	SPAC22G7.06c|ura1|I|carbamoyl-phosphate	80	80	78	>SPAC22G7.06c|ura1|I|carbamoyl-phosphate synthase (glutamine hydrolyzing), aspartate carbamoyltransferase Ura1	1	80	80	78	70	73	70	63	70	73	70	63	69	72	69	62	40.1	40.1	39.3	248.31	2244	2244	0	323.31	By MS/MS	By MS/MS	By MS/MS	By MS/MS	36.6	38.2	36.5	33.3	4409500000	1020500000	1234800000	1087800000	1066400000	816450000	1069200000	886220000	1061300000	69	73	65
SPAC22H10.08|SPAC22H10.08|I|DUF2009	SPAC22H10.08|SPAC22H10.08|I|DUF2009	1	1	1	>SPAC22H10.08|SPAC22H10.08|I|DUF2009 protein	1	1	1	1	1	0	1	0	1	0	1	0	1	0	1	0	2	2	2	56.534	492	492	0	3.4962	By MS/MS	By matching	By MS/MS	By matching	2	0	2	0	3724200	2232300	0	1492000	0	0	0	1235800	0	1	0	1
SPAC22H10.12c|gdi1|I|GDP	SPAC22H10.12c|gdi1|I|GDP	2	2	2	>SPAC22H10.12c|gdi1|I|GDP dissociation inhibitor Gdi1 (predicted)	1	2	2	2	2	2	2	2	2	2	2	2	2	2	2	2	4.8	4.8	4.8	49.555	440	440	0	5.3651	By MS/MS	By MS/MS	By MS/MS	By MS/MS	4.8	4.8	4.8	4.8	18380000	5046400	5846200	2360400	5126700	4107100	5162500	0	5162700	2	1	2
SPAC22H12.01c|mug35|I|Schizosaccharomyces	SPAC22H12.01c|mug35|I|Schizosaccharomyces	1	1	1	>SPAC22H12.01c|mug35|I|Schizosaccharomyces specific protein Mug35	1	1	1	1	1	1	1	0	1	1	1	0	1	1	1	0	5.6	5.6	5.6	27.521	234	234	0.0069071	2.2555	By matching	By MS/MS	By MS/MS	By matching	5.6	5.6	5.6	0	5874600	2362300	2221300	1291000	0	0	0	1069400	0	0	1	1
SPAC22H12.02|tfg3|I|transcription	SPAC22H12.02|tfg3|I|transcription	4	4	4	>SPAC22H12.02|tfg3|I|transcription factor TFIIF complex subunit Tfg3	1	4	4	4	4	2	4	1	4	2	4	1	4	2	4	1	29.5	29.5	29.5	27.638	241	241	0	56.888	By MS/MS	By MS/MS	By MS/MS	By MS/MS	29.5	11.6	29.5	4.1	45576000	15345000	9876200	13988000	6366800	8779100	9241500	9721000	11595000	4	2	5
SPAC22H12.04c|rps102|I|40S	SPAC22H12.04c|rps102|I|40S	10	10	6	>SPAC22H12.04c|rps102|I|40S ribosomal protein S3a (predicted)	1	10	10	6	8	9	8	8	8	9	8	8	4	6	5	5	32.1	32.1	23	28.521	252	252	0	38.99	By MS/MS	By MS/MS	By MS/MS	By MS/MS	31.7	29	29.4	29.4	510870000	140410000	111790000	149810000	108860000	102550000	107220000	110170000	108050000	11	8	10
SPAC23A1.03|apt1|I|adenine	SPAC23A1.03|apt1|I|adenine	1	1	1	>SPAC23A1.03|apt1|I|adenine phosphoribosyltransferase (APRT) (predicted)	1	1	1	1	0	0	0	1	0	0	0	1	0	0	0	1	12.2	12.2	12.2	20.746	188	188	0.00080775	2.837	By matching	By matching	By matching	By MS/MS	0	0	0	12.2	1902100	0	0	0	1902100	0	0	0	1902100	0	0	0
SPCC1322.15|rpl3402|III|60S;SPAC23A1.08c|rpl3401|I|60S	SPCC1322.15|rpl3402|III|60S;SPAC23A1.08c|rpl3401|I|60S	1;1	1;1	1;1	>SPCC1322.15|rpl3402|III|60S ribosomal protein L34;>SPAC23A1.08c|rpl3401|I|60S ribosomal protein L34	2	1	1	1	0	0	0	1	0	0	0	1	0	0	0	1	15.3	15.3	15.3	12.8	111	111;112	0.0031447	2.4944	By matching	By matching	By matching	By MS/MS	0	0	0	15.3	10884000	0	0	0	10884000	0	0	0	10884000	0	0	0
SPCC794.09c|tef101|III|translation;SPBC839.15c|tef103|II|translation;SPAC23A1.10|tef102|I|translation	SPCC794.09c|tef101|III|translation;SPBC839.15c|tef103|II|translation;SPAC23A1.10|tef102|I|translation	26;26;26	26;26;26	26;26;26	>SPCC794.09c|tef101|III|translation elongation factor EF-1 alpha Ef1a-a;>SPBC839.15c|tef103|II|translation elongation factor EF-1 alpha Ef1a-c;>SPAC23A1.10|tef102|I|translation elongation factor EF-1 alpha Ef1a-b	3	26	26	26	24	22	23	22	24	22	23	22	24	22	23	22	56.3	56.3	56.3	49.66	460	460;460;460	0	321.96	By MS/MS	By MS/MS	By MS/MS	By MS/MS	55.9	54.3	55.9	52.6	18281000000	5010800000	4531300000	4736500000	4002900000	3229400000	2980200000	3284700000	3450800000	51	47	42
SPBC839.13c|rpl1601|II|60S;SPAC23A1.11|rpl1602|I|60S;SPBC2G2.05|rpl1603|II|60S	SPBC839.13c|rpl1601|II|60S;SPAC23A1.11|rpl1602|I|60S;SPBC2G2.05|rpl1603|II|60S	4;4;2	4;4;2	4;4;2	>SPBC839.13c|rpl1601|II|60S ribosomal protein L13/L16 (predicted);>SPAC23A1.11|rpl1602|I|60S ribosomal protein L13/L16 (predicted);>SPBC2G2.05|rpl1603|II|60S ribosomal protein L13/L16 (predicted)	3	4	4	4	4	3	4	3	4	3	4	3	4	3	4	3	24.4	24.4	24.4	22.17	197	197;197;197	0	18.716	By MS/MS	By MS/MS	By MS/MS	By MS/MS	24.4	20.3	24.4	20.3	173510000	56927000	37810000	44040000	34729000	44758000	38333000	33926000	34542000	5	3	4
SPAC23A1.12c|frs1|I|cytoplasmic	SPAC23A1.12c|frs1|I|cytoplasmic	8	8	8	>SPAC23A1.12c|frs1|I|cytoplasmic phenylalanine-tRNA ligase beta subunit Frs1 (predicted)	1	8	8	8	6	8	5	7	6	8	5	7	6	8	5	7	18	18	18	66.849	589	589	0	25.385	By MS/MS	By MS/MS	By MS/MS	By MS/MS	10.4	18	8.5	13.4	132660000	27320000	47329000	28931000	29080000	30093000	30287000	31681000	25081000	5	8	4
SPAC23A1.14c|SPAC23A1.14c|I|uncharacterised	SPAC23A1.14c|SPAC23A1.14c|I|uncharacterised	4	4	4	>SPAC23A1.14c|SPAC23A1.14c|I|uncharacterised trans-sulfuration enzyme (predicted)	1	4	4	4	4	3	4	2	4	3	4	2	4	3	4	2	13.6	13.6	13.6	43.284	398	398	0	11.3	By MS/MS	By MS/MS	By MS/MS	By MS/MS	13.6	10.6	13.6	7.8	33541000	8850000	7527700	13667000	3495700	5405900	6082700	10681000	6582600	2	2	2
SPAC23A1.17|bbc1|I|WIP	SPAC23A1.17|bbc1|I|WIP	8	8	8	>SPAC23A1.17|bbc1|I|WIP family cytoskeletal protein Bbc1 (predicted)	1	8	8	8	8	7	8	7	8	7	8	7	8	7	8	7	7.7	7.7	7.7	170.53	1611	1611	0	56.479	By MS/MS	By MS/MS	By MS/MS	By MS/MS	7.7	6.8	7.7	6.8	332000000	85274000	74993000	98991000	72743000	71786000	66861000	79823000	72696000	7	6	8
SPBP4H10.13|rps2302|II|40S;SPAC23C11.02c|rps23|I|40S	SPBP4H10.13|rps2302|II|40S;SPAC23C11.02c|rps23|I|40S	3;3	3;3	3;3	>SPBP4H10.13|rps2302|II|40S ribosomal protein S23 (predicted);>SPAC23C11.02c|rps23|I|40S ribosomal protein S23 (predicted)	2	3	3	3	3	2	2	2	3	2	2	2	3	2	2	2	32.9	32.9	32.9	15.655	143	143;143	0	23.721	By MS/MS	By MS/MS	By MS/MS	By MS/MS	32.9	28	28	28	148600000	40487000	37456000	34116000	36541000	33617000	0	0	0	1	2	2
SPAC23C11.05|ipp1|I|inorganic	SPAC23C11.05|ipp1|I|inorganic	6	6	6	>SPAC23C11.05|ipp1|I|inorganic pyrophosphatase Ipp1 (predicted)	1	6	6	6	5	4	5	5	5	4	5	5	5	4	5	5	33.2	33.2	33.2	32.467	289	289	0	29.627	By MS/MS	By MS/MS	By MS/MS	By MS/MS	22.8	20.4	22.8	30.8	194570000	47127000	52663000	49479000	45302000	29514000	46921000	32272000	39611000	7	5	2
SPAC23C11.09|ala1|I|mitochondrial	SPAC23C11.09|ala1|I|mitochondrial	9	9	9	>SPAC23C11.09|ala1|I|mitochondrial and cytoplasmic alanine-tRNA ligase Ala1 (predicted)	1	9	9	9	2	6	4	6	2	6	4	6	2	6	4	6	13	13	13	107.38	959	959	0	20.714	By MS/MS	By MS/MS	By MS/MS	By MS/MS	2.5	9.1	4.2	9.3	54165000	6641900	21169000	11288000	15066000	11622000	14612000	9745000	12476000	1	6	3
SPAC23C11.11|cka1|I|serine/threonine	SPAC23C11.11|cka1|I|serine/threonine	9	9	9	>SPAC23C11.11|cka1|I|serine/threonine protein kinase Cka1	1	9	9	9	5	5	6	5	5	5	6	5	5	5	6	5	32.8	32.8	32.8	39.527	332	332	0	46.968	By MS/MS	By MS/MS	By MS/MS	By MS/MS	17.2	16.3	25	15.1	105740000	24029000	29640000	26994000	25073000	21021000	24747000	19598000	27954000	4	7	4
SPAC23C11.14|zhf1|I|zinc	SPAC23C11.14|zhf1|I|zinc	4	4	4	>SPAC23C11.14|zhf1|I|zinc ion transmembrane transporter Zhf1	1	4	4	4	4	4	4	3	4	4	4	3	4	4	4	3	15	15	15	42.941	387	387	0	59.283	By MS/MS	By MS/MS	By MS/MS	By MS/MS	15	15	15	11.1	301530000	99178000	67113000	87478000	47761000	74862000	57111000	72174000	57149000	4	4	3
SPAC23C11.15|pst2|I|Clr6	SPAC23C11.15|pst2|I|Clr6	11	11	11	>SPAC23C11.15|pst2|I|Clr6 histone deacetylase complex subunit Pst2	1	11	11	11	6	9	8	5	6	9	8	5	6	9	8	5	12.9	12.9	12.9	124.85	1075	1075	0	52.927	By MS/MS	By MS/MS	By MS/MS	By MS/MS	6.4	10.8	10.2	5.6	134720000	32020000	37312000	36762000	28623000	29060000	25142000	26757000	37351000	4	7	7
SPAC23C11.16|plo1|I|Polo	SPAC23C11.16|plo1|I|Polo	19	19	19	>SPAC23C11.16|plo1|I|Polo kinase Plo1	1	19	19	19	17	14	17	13	17	14	17	13	17	14	17	13	33.4	33.4	33.4	77.301	683	683	0	182.81	By MS/MS	By MS/MS	By MS/MS	By MS/MS	27.5	22.5	29.9	22.3	595100000	183210000	139330000	163840000	108720000	147360000	111440000	128210000	113780000	20	18	15
SPAC23C4.02|crn1|I|actin	SPAC23C4.02|crn1|I|actin	3	3	3	>SPAC23C4.02|crn1|I|actin binding protein, coronin Crn1	1	3	3	3	0	1	2	0	0	1	2	0	0	1	2	0	3	3	3	67.015	601	601	0	32.959	By matching	By MS/MS	By MS/MS	By matching	0	1.5	1.5	0	821370000	0	0	821370000	0	0	0	680370000	0	0	1	4
SPAC23C4.05c|SPAC23C4.05c|I|LEA	SPAC23C4.05c|SPAC23C4.05c|I|LEA	2	2	2	>SPAC23C4.05c|SPAC23C4.05c|I|LEA domain protein	1	2	2	2	2	2	2	2	2	2	2	2	2	2	2	2	5.1	5.1	5.1	49.532	431	431	0	3.2437	By MS/MS	By MS/MS	By MS/MS	By MS/MS	5.1	5.1	5.1	5.1	15709000	4466100	3322800	4920300	2999900	0	0	0	2999900	1	1	0
SPAC23C4.08|rho3|I|Rho	SPAC23C4.08|rho3|I|Rho	2	2	2	>SPAC23C4.08|rho3|I|Rho family GTPase Rho3	1	2	2	2	2	2	1	2	2	2	1	2	2	2	1	2	7.8	7.8	7.8	22.501	205	205	0	6.2029	By MS/MS	By MS/MS	By MS/MS	By MS/MS	7.8	7.8	3.4	7.8	5506000	0	3893700	0	1612400	0	3407000	0	0	2	1	1
SPAC23C4.12|hhp2|I|serine/threonine	SPAC23C4.12|hhp2|I|serine/threonine	15	15	14	>SPAC23C4.12|hhp2|I|serine/threonine protein kinase Hhp2	1	15	15	14	15	12	13	12	15	12	13	12	14	11	12	11	51.8	51.8	48.8	45.831	400	400	0	90.881	By MS/MS	By MS/MS	By MS/MS	By MS/MS	51.8	40	40	40.5	643820000	237950000	145440000	133810000	126620000	183150000	122370000	110050000	127550000	18	11	11
SPAC23C4.15|rpb5|I|DNA-directed	SPAC23C4.15|rpb5|I|DNA-directed	2	2	2	>SPAC23C4.15|rpb5|I|DNA-directed RNA polymerase I, II and III subunit Rpb5	1	2	2	2	2	1	2	1	2	1	2	1	2	1	2	1	10	10	10	23.915	210	210	0	4.0804	By MS/MS	By MS/MS	By MS/MS	By MS/MS	10	5.7	10	5.7	11234000	1636500	3162100	3856900	2578300	0	2642600	3084100	2813200	1	2	2
SPAC23D3.04c|gpd2|I|glycerol-3-phosphate	SPAC23D3.04c|gpd2|I|glycerol-3-phosphate	7	7	7	>SPAC23D3.04c|gpd2|I|glycerol-3-phosphate dehydrogenase Gpd2	1	7	7	7	5	6	5	5	5	6	5	5	5	6	5	5	27.9	27.9	27.9	40.874	373	373	0	26.265	By MS/MS	By MS/MS	By MS/MS	By MS/MS	21.7	24.9	20.1	20.4	122620000	32388000	38277000	21219000	30738000	33179000	30347000	18729000	26444000	5	8	6
SPAC23D3.06c|nup146|I|nucleoporin	SPAC23D3.06c|nup146|I|nucleoporin	29	29	29	>SPAC23D3.06c|nup146|I|nucleoporin Nup146	1	29	29	29	29	16	6	3	29	16	6	3	29	16	6	3	30.9	30.9	30.9	145.78	1325	1325	0	169.36	By MS/MS	By MS/MS	By MS/MS	By MS/MS	30.9	16.7	4.8	2.6	401990000	271480000	111090000	17557000	1857100	208370000	113830000	14972000	0	33	13	3
SPAC23G3.01|rpb2|I|RNA	SPAC23G3.01|rpb2|I|RNA	24	24	24	>SPAC23G3.01|rpb2|I|RNA polymerase II complex subunit Rpb2	1	24	24	24	17	21	17	15	17	21	17	15	17	21	17	15	25.4	25.4	25.4	137.85	1210	1210	0	118.72	By MS/MS	By MS/MS	By MS/MS	By MS/MS	18.2	23	17.7	16.1	486350000	89519000	155910000	113660000	127270000	81087000	117460000	97659000	133010000	9	19	13
SPAC23G3.02c|sib1|I|ferrichrome	SPAC23G3.02c|sib1|I|ferrichrome	15	15	15	>SPAC23G3.02c|sib1|I|ferrichrome synthetase Sib1	1	15	15	15	8	7	10	9	8	7	10	9	8	7	10	9	3.5	3.5	3.5	559.84	4924	4924	0	64.456	By MS/MS	By MS/MS	By MS/MS	By MS/MS	2.1	1.9	2.5	2.3	77817000	21064000	13183000	18485000	25085000	18876000	14729000	16862000	18955000	7	2	5
SPAC23G3.03|sib2|I|ornithine	SPAC23G3.03|sib2|I|ornithine	6	6	6	>SPAC23G3.03|sib2|I|ornithine N5 monooxygenase (predicted)	1	6	6	6	5	4	4	3	5	4	4	3	5	4	4	3	26.7	26.7	26.7	48.582	431	431	0	27.937	By MS/MS	By MS/MS	By MS/MS	By MS/MS	24.1	18.8	16.2	9.3	106970000	45028000	21195000	27891000	12854000	27225000	18532000	27213000	18920000	5	3	3
SPAC23G3.06|nop58|I|U3	SPAC23G3.06|nop58|I|U3	10	10	10	>SPAC23G3.06|nop58|I|U3 snoRNP protein Nop58 (predicted)	1	10	10	10	7	7	5	6	7	7	5	6	7	7	5	6	28.7	28.7	28.7	55.758	508	508	0	45.24	By MS/MS	By MS/MS	By MS/MS	By MS/MS	18.5	19.5	12.8	17.9	155180000	54203000	29617000	39266000	32092000	28807000	28431000	41618000	36684000	8	5	4
SPAC23G3.08c|ubp7|I|ubiquitin	SPAC23G3.08c|ubp7|I|ubiquitin	4	4	4	>SPAC23G3.08c|ubp7|I|ubiquitin C-terminal hydrolase Ubp7	1	4	4	4	2	2	1	4	2	2	1	4	2	2	1	4	5.1	5.1	5.1	98.376	875	875	0	13.518	By MS/MS	By MS/MS	By matching	By MS/MS	3.4	3.4	2.1	5.1	22498000	3720800	6454000	3411300	8912200	0	0	0	8912200	1	1	0
SPAC23G3.10c|ssr3|I|SWI/SNF	SPAC23G3.10c|ssr3|I|SWI/SNF	3	3	3	>SPAC23G3.10c|ssr3|I|SWI/SNF and RSC complex subunit Ssr3	1	3	3	3	3	1	1	3	3	1	1	3	3	1	1	3	5.4	5.4	5.4	49.759	425	425	0	20.92	By MS/MS	By MS/MS	By MS/MS	By MS/MS	5.4	1.6	1.6	5.4	7205600	4264700	0	1612100	1328900	3541100	0	0	0	3	1	0
SPAC23G3.11|rpn6|I|19S	SPAC23G3.11|rpn6|I|19S	2	2	2	>SPAC23G3.11|rpn6|I|19S proteasome regulatory subunit Rpn6 (predicted)	1	2	2	2	1	2	0	2	1	2	0	2	1	2	0	2	8.3	8.3	8.3	47.341	421	421	0	9.3161	By MS/MS	By MS/MS	By matching	By MS/MS	4	8.3	0	8.3	25098000	5577900	10030000	0	9490700	0	8887600	0	9379200	0	2	0
SPAC23H3.09c|gly1|I|threonine	SPAC23H3.09c|gly1|I|threonine	4	4	4	>SPAC23H3.09c|gly1|I|threonine aldolase Gly1 (predicted)	1	4	4	4	1	4	0	4	1	4	0	4	1	4	0	4	17.3	17.3	17.3	41.318	376	376	0	14.032	By matching	By MS/MS	By matching	By MS/MS	4	17.3	0	17.3	39483000	1179200	17963000	0	20341000	0	15752000	0	19563000	0	4	0
SPAC23H3.10|ssr2|I|SWI/SNF	SPAC23H3.10|ssr2|I|SWI/SNF	4	4	4	>SPAC23H3.10|ssr2|I|SWI/SNF and RSC complex subunit Ssr2	1	4	4	4	4	3	4	3	4	3	4	3	4	3	4	3	9.3	9.3	9.3	57.684	503	503	0	9.2061	By MS/MS	By MS/MS	By MS/MS	By MS/MS	9.3	8	9.3	8	77203000	24590000	15653000	24026000	12934000	17807000	15514000	18890000	14739000	3	1	3
SPAC23H4.01c|osh3|I|sterol	SPAC23H4.01c|osh3|I|sterol	10	10	10	>SPAC23H4.01c|osh3|I|sterol binding ankyrin repeat protein Osh3	1	10	10	10	7	8	9	7	7	8	9	7	7	8	9	7	15.2	15.2	15.2	106.81	945	945	0	48.844	By MS/MS	By MS/MS	By MS/MS	By MS/MS	9.6	12.2	14	9.4	152980000	43682000	32982000	45502000	30811000	37196000	27699000	31619000	36670000	5	6	6
SPAC23H4.03c|erv25|I|COPII-coated	SPAC23H4.03c|erv25|I|COPII-coated	1	1	1	>SPAC23H4.03c|erv25|I|COPII-coated vesicle component Erv25 (predicted)	1	1	1	1	1	1	1	1	1	1	1	1	1	1	1	1	3.7	3.7	3.7	24.485	216	216	0.00081833	2.9435	By MS/MS	By MS/MS	By MS/MS	By matching	3.7	3.7	3.7	3.7	11242000	3803200	3659700	1937200	1841600	0	0	0	1841600	1	1	1
SPAC23H4.06|gln1|I|glutamate-ammonia	SPAC23H4.06|gln1|I|glutamate-ammonia	7	7	7	>SPAC23H4.06|gln1|I|glutamate-ammonia ligase Gln1	1	7	7	7	7	5	5	3	7	5	5	3	7	5	5	3	29.2	29.2	29.2	40.018	359	359	0	30.88	By MS/MS	By MS/MS	By MS/MS	By MS/MS	29.2	20.9	22.8	12.8	114690000	50719000	23768000	25085000	15119000	27226000	24582000	25912000	21089000	4	4	3
SPAC23H4.09|cdb4|I|curved	SPAC23H4.09|cdb4|I|curved	1	1	1	>SPAC23H4.09|cdb4|I|curved DNA-binding protein Cdb4, peptidase family	1	1	1	1	0	0	0	1	0	0	0	1	0	0	0	1	4.2	4.2	4.2	41.597	381	381	0	11.002	By matching	By matching	By matching	By MS/MS	0	0	0	4.2	0	0	0	0	0	0	0	0	0	0	0	0
SPAC23H4.10c|thi4|I|bifunctional	SPAC23H4.10c|thi4|I|bifunctional	14	14	14	>SPAC23H4.10c|thi4|I|bifunctional thiamine-phosphate dipyrophosphorylase/hydroxyethylthiazole kinase	1	14	14	14	13	13	12	12	13	13	12	12	13	13	12	12	36.1	36.1	36.1	55.565	518	518	0	93.741	By MS/MS	By MS/MS	By MS/MS	By MS/MS	32.2	33.2	29.5	32.8	522640000	158760000	152000000	110370000	101510000	115580000	125630000	108440000	108110000	14	15	12
SPAC24B11.05|SPAC24B11.05|I|pyrimidine	SPAC24B11.05|SPAC24B11.05|I|pyrimidine	2	2	2	>SPAC24B11.05|SPAC24B11.05|I|pyrimidine 5-nucleotidase (predicted)	1	2	2	2	1	2	2	0	1	2	2	0	1	2	2	0	10.2	10.2	10.2	26.513	226	226	0	4.9878	By MS/MS	By MS/MS	By MS/MS	By matching	3.1	10.2	10.2	0	8128800	1061300	3336400	3731100	0	0	2919400	0	0	1	1	2
SPAC24B11.06c|sty1|I|MAP	SPAC24B11.06c|sty1|I|MAP	6	5	5	>SPAC24B11.06c|sty1|I|MAP kinase Sty1	1	6	5	5	3	4	4	3	2	3	3	3	2	3	3	3	18.1	15.8	15.8	40.222	349	349	0	12.073	By MS/MS	By MS/MS	By MS/MS	By MS/MS	8	10.6	10.6	9.5	27217000	4556300	5589800	10476000	6594800	0	5623300	7150200	7390500	2	1	3
SPAC24B11.08c|SPAC24B11.08c|I|COPII-coated	SPAC24B11.08c|SPAC24B11.08c|I|COPII-coated	5	5	5	>SPAC24B11.08c|SPAC24B11.08c|I|COPII-coated vesicle component Erv46 (predicted)	1	5	5	5	3	3	4	4	3	3	4	4	3	3	4	4	15.4	15.4	15.4	43.707	390	390	0	13.346	By MS/MS	By MS/MS	By MS/MS	By MS/MS	10.5	9.7	12.6	13.3	47182000	15264000	6386700	12716000	12815000	11119000	8735400	12859000	8897700	1	2	1
SPAC24B11.09|mpc2|I|mitochondrial	SPAC24B11.09|mpc2|I|mitochondrial	2	2	2	>SPAC24B11.09|mpc2|I|mitochondrial pyruvate transmembrane transporter Mpc2 (predicted)	1	2	2	2	1	1	2	1	1	1	2	1	1	1	2	1	14.4	14.4	14.4	13.536	118	118	0	5.6207	By MS/MS	By MS/MS	By MS/MS	By MS/MS	7.6	7.6	14.4	7.6	14839000	2327400	3899400	3949500	4662200	2014800	3508200	0	4483800	2	2	2
SPAC24B11.11c|sid2|I|NDR	SPAC24B11.11c|sid2|I|NDR	6	6	6	>SPAC24B11.11c|sid2|I|NDR kinase Sid2	1	6	6	6	6	5	6	5	6	5	6	5	6	5	6	5	12.5	12.5	12.5	70.491	607	607	0	21.436	By MS/MS	By MS/MS	By MS/MS	By MS/MS	12.5	10.5	12.5	10.5	90819000	20727000	22953000	26427000	20712000	18356000	22743000	18224000	20574000	6	5	5
SPAC24C9.03|mvd1|I|diphosphomevalonate	SPAC24C9.03|mvd1|I|diphosphomevalonate	1	1	1	>SPAC24C9.03|mvd1|I|diphosphomevalonate decarboxylase mvd1 (predicted)	1	1	1	1	0	1	0	0	0	1	0	0	0	1	0	0	4.1	4.1	4.1	42.755	393	393	0	3.5955	By matching	By MS/MS	By matching	By matching	0	4.1	0	0	2703100	0	2703100	0	0	0	2365300	0	0	0	1	0
SPAC24C9.06c|aco1|I|aconitate	SPAC24C9.06c|aco1|I|aconitate	11	11	11	>SPAC24C9.06c|aco1|I|aconitate hydratase Aco1 (predicted)	1	11	11	11	9	5	9	8	9	5	9	8	9	5	9	8	17.1	17.1	17.1	86.112	789	789	0	36.211	By MS/MS	By MS/MS	By MS/MS	By MS/MS	13.4	9.4	14.2	12.9	160410000	48360000	32042000	43968000	36043000	40173000	34200000	39583000	26699000	7	4	8
SPAC24C9.08|cps1|I|vacuolar	SPAC24C9.08|cps1|I|vacuolar	1	1	1	>SPAC24C9.08|cps1|I|vacuolar carboxypeptidase (predicted)	1	1	1	1	1	1	1	0	1	1	1	0	1	1	1	0	2.5	2.5	2.5	66.606	596	596	0	5.3056	By matching	By MS/MS	By MS/MS	By matching	2.5	2.5	2.5	0	15061000	6943000	3936900	4181100	0	0	0	3463400	0	0	1	1
SPAC24C9.12c|shm1|I|serine	SPAC24C9.12c|shm1|I|serine	30	30	29	>SPAC24C9.12c|shm1|I|serine hydroxymethyltransferase Shm1 (predicted)	1	30	30	29	30	22	27	19	30	22	27	19	29	21	27	18	68.3	68.3	66.4	51.86	467	467	0	323.31	By MS/MS	By MS/MS	By MS/MS	By MS/MS	68.3	52.7	66.4	46.5	7369000000	2864400000	1191100000	2163900000	1149500000	1900700000	963190000	1414500000	1067100000	52	37	49
SPAC24C9.16c|cox8|I|cytochrome	SPAC24C9.16c|cox8|I|cytochrome	1	1	1	>SPAC24C9.16c|cox8|I|cytochrome c oxidase subunit VIII (predicted)	1	1	1	1	1	1	0	1	1	1	0	1	1	1	0	1	16.7	16.7	16.7	7.5018	66	66	0	4.0275	By matching	By MS/MS	By matching	By matching	16.7	16.7	0	16.7	7206700	1572700	3094000	0	2540000	0	0	0	2540000	0	1	0
SPAC24H6.01c|SPAC24H6.01c|I|membrane	SPAC24H6.01c|SPAC24H6.01c|I|membrane	1	1	1	>SPAC24H6.01c|SPAC24H6.01c|I|membrane bound O-acyltransferase, MBOAT (predicted)	1	1	1	1	1	1	0	1	1	1	0	1	1	1	0	1	3.1	3.1	3.1	68.233	583	583	0	3.6322	By MS/MS	By MS/MS	By matching	By MS/MS	3.1	3.1	0	3.1	6250100	1764400	2526900	0	1958700	0	0	0	1958700	0	1	0
SPAC24H6.04|hxk1|I|hexokinase	SPAC24H6.04|hxk1|I|hexokinase	10	10	10	>SPAC24H6.04|hxk1|I|hexokinase 1	1	10	10	10	6	7	9	8	6	7	9	8	6	7	9	8	21.5	21.5	21.5	53.597	484	484	0	38.63	By MS/MS	By MS/MS	By MS/MS	By MS/MS	12	14.7	19.2	16.9	235670000	29521000	67481000	59647000	79018000	34878000	55102000	42583000	79422000	4	6	9
SPAC24H6.07|rps901|I|40S	SPAC24H6.07|rps901|I|40S	13	13	1	>SPAC24H6.07|rps901|I|40S ribosomal protein S9	1	13	13	1	13	9	12	9	13	9	12	9	1	1	1	0	46.6	46.6	4.2	22.161	191	191	0	63.847	By MS/MS	By MS/MS	By MS/MS	By MS/MS	46.6	33	46.6	32.5	408220000	137940000	84572000	123470000	62241000	97844000	83215000	90531000	77762000	11	8	13
SPAC24H6.10c|SPAC24H6.10c|I|phospho-2-dehydro-3-deoxyheptonate	SPAC24H6.10c|SPAC24H6.10c|I|phospho-2-dehydro-3-deoxyheptonate	5	5	5	>SPAC24H6.10c|SPAC24H6.10c|I|phospho-2-dehydro-3-deoxyheptonate aldolase (predicted)	1	5	5	5	3	5	3	4	3	5	3	4	3	5	3	4	21.5	21.5	21.5	39.76	368	368	0	29.2	By MS/MS	By MS/MS	By MS/MS	By MS/MS	13.6	21.5	13.6	17.1	92468000	13269000	39631000	15800000	23767000	15222000	28287000	15205000	23837000	3	5	2
SPAC24H6.13|SPAC24H6.13|I|DUF221	SPAC24H6.13|SPAC24H6.13|I|DUF221	2	2	2	>SPAC24H6.13|SPAC24H6.13|I|DUF221 family protein implicated in Golgi to plasma membrane transport (predicted)	1	2	2	2	2	1	0	1	2	1	0	1	2	1	0	1	2.9	2.9	2.9	98.441	871	871	0	7.2081	By MS/MS	By MS/MS	By matching	By MS/MS	2.9	1.3	0	1.3	10310000	2823500	4650100	0	2836600	0	0	0	2836600	2	1	0
SPAC25A8.01c|fft3|I|SMARCAD1	SPAC25A8.01c|fft3|I|SMARCAD1	2	2	2	>SPAC25A8.01c|fft3|I|SMARCAD1 family ATP-dependent DNA helicase Fft3	1	2	2	2	0	1	1	2	0	1	1	2	0	1	1	2	2.5	2.5	2.5	104.5	922	922	0	6.4326	By matching	By MS/MS	By matching	By MS/MS	0	1.4	1.4	2.5	3990400	0	1774500	2215900	0	0	0	1835500	0	0	1	0
SPAC25B8.04c|mss51|I|mitochondrial	SPAC25B8.04c|mss51|I|mitochondrial	2	2	2	>SPAC25B8.04c|mss51|I|mitochondrial splicing suppressor Mss51 (predicted)	1	2	2	2	2	1	1	2	2	1	1	2	2	1	1	2	6.3	6.3	6.3	43.599	378	378	0	6.7933	By MS/MS	By MS/MS	By MS/MS	By MS/MS	6.3	2.1	2.1	6.3	20107000	9242100	1692100	1749700	7423400	7488200	0	0	7609200	2	1	1
SPAC25B8.11|SPAC25B8.11|I|transcription	SPAC25B8.11|SPAC25B8.11|I|transcription	1	1	1	>SPAC25B8.11|SPAC25B8.11|I|transcription factor (predicted)	1	1	1	1	1	0	0	0	1	0	0	0	1	0	0	0	1.5	1.5	1.5	74.715	654	654	0	3.2091	By MS/MS	By matching	By matching	By matching	1.5	0	0	0	3591800	3591800	0	0	0	2982400	0	0	0	1	0	0
SPAC25B8.12c|SPAC25B8.12c|I|unknown	SPAC25B8.12c|SPAC25B8.12c|I|unknown	9	9	9	>SPAC25B8.12c|SPAC25B8.12c|I|unknown HAD superfamily hydrolase	1	9	9	9	8	9	6	6	8	9	6	6	8	9	6	6	47.2	47.2	47.2	33.85	303	303	0	41.304	By MS/MS	By MS/MS	By MS/MS	By MS/MS	40.3	47.2	28.4	35.6	251440000	65665000	71812000	56984000	56979000	45263000	61091000	42789000	72398000	6	6	4
SPAC25G10.05c|his1|I|ATP	SPAC25G10.05c|his1|I|ATP	3	3	3	>SPAC25G10.05c|his1|I|ATP phosphoribosyltransferase	1	3	3	3	1	2	1	1	1	2	1	1	1	2	1	1	11.3	11.3	11.3	34.029	310	310	0	7.7598	By MS/MS	By MS/MS	By MS/MS	By MS/MS	3.2	8.1	2.3	2.3	8826200	0	3066800	2627100	3132200	0	0	0	3132200	1	2	1
SPCC285.15c|rps2802|III|40S;SPAC25G10.06|rps2801|I|40S	SPCC285.15c|rps2802|III|40S;SPAC25G10.06|rps2801|I|40S	1;1	1;1	1;1	>SPCC285.15c|rps2802|III|40S ribosomal protein S28, Rps2802;>SPAC25G10.06|rps2801|I|40S ribosomal protein S28 (predicted)	2	1	1	1	1	1	1	1	1	1	1	1	1	1	1	1	23.5	23.5	23.5	7.6638	68	68;68	0	3.5313	By MS/MS	By MS/MS	By MS/MS	By MS/MS	23.5	23.5	23.5	23.5	18152000	4542200	4796800	4137500	4675800	0	0	0	4675800	1	1	2
SPAC25G10.08|SPAC25G10.08|I|translation	SPAC25G10.08|SPAC25G10.08|I|translation	20	20	20	>SPAC25G10.08|SPAC25G10.08|I|translation initiation factor eIF3b (p84)	1	20	20	20	13	12	15	12	13	12	15	12	13	12	15	12	31.7	31.7	31.7	84.034	725	725	0	73.371	By MS/MS	By MS/MS	By MS/MS	By MS/MS	22.6	21	26.2	19	303640000	91789000	70841000	78591000	62418000	66214000	63713000	61336000	72210000	10	9	11
SPAC25G10.09c|pan1|I|actin	SPAC25G10.09c|pan1|I|actin	1	1	1	>SPAC25G10.09c|pan1|I|actin cortical patch component, with EF hand and WH2 motif Panl (predicted)	1	1	1	1	1	0	1	0	1	0	1	0	1	0	1	0	0.6	0.6	0.6	193.28	1794	1794	0.0023734	2.5615	By MS/MS	By matching	By MS/MS	By matching	0.6	0	0.6	0	0	0	0	0	0	0	0	0	0	1	0	1
SPAC25H1.07|emc1|I|ER	SPAC25H1.07|emc1|I|ER	4	4	4	>SPAC25H1.07|emc1|I|ER membrane protein complex subunit Emc1 (predicted)	1	4	4	4	3	4	3	3	3	4	3	3	3	4	3	3	4.9	4.9	4.9	100.92	885	885	0	8.7388	By MS/MS	By MS/MS	By MS/MS	By MS/MS	3.7	4.9	3.7	3.7	405970000	16179000	13743000	370550000	5502300	25144000	23746000	269670000	18445000	2	2	3
SPAC3A12.10|rpl2001|I|60S;SPAC26A3.04|rpl2002|I|60S	SPAC3A12.10|rpl2001|I|60S;SPAC26A3.04|rpl2002|I|60S	4;4	4;4	4;4	>SPAC3A12.10|rpl2001|I|60S ribosomal protein L20a (predicted);>SPAC26A3.04|rpl2002|I|60S ribosomal protein L20 (predicted)	2	4	4	4	3	3	3	2	3	3	3	2	3	3	3	2	22.2	22.2	22.2	20.599	176	176;176	0	7.6123	By MS/MS	By MS/MS	By MS/MS	By MS/MS	15.3	17	15.3	10.2	47511000	17008000	6949800	18877000	4675400	12977000	7624400	14114000	5800500	2	3	2
SPAC26A3.05|chc1|I|clathrin	SPAC26A3.05|chc1|I|clathrin	39	39	39	>SPAC26A3.05|chc1|I|clathrin heavy chain Chc1 (predicted)	1	39	39	39	29	33	34	30	29	33	34	30	29	33	34	30	32.6	32.6	32.6	190.02	1666	1666	0	294.48	By MS/MS	By MS/MS	By MS/MS	By MS/MS	25.9	29.2	29.2	25.3	1453400000	289760000	457780000	326290000	379540000	250860000	379430000	274110000	374410000	25	31	29
SPBC17G9.10|rpl1102|II|60S;SPAC26A3.07c|rpl1101|I|60S	SPBC17G9.10|rpl1102|II|60S;SPAC26A3.07c|rpl1101|I|60S	4;4	4;4	4;4	>SPBC17G9.10|rpl1102|II|60S ribosomal protein L11 (predicted);>SPAC26A3.07c|rpl1101|I|60S ribosomal protein L11 (predicted)	2	4	4	4	4	3	4	4	4	3	4	4	4	3	4	4	26.4	26.4	26.4	19.891	174	174;174	0	31.424	By MS/MS	By MS/MS	By MS/MS	By MS/MS	26.4	21.8	26.4	26.4	164250000	42221000	40489000	37394000	44143000	33427000	0	32096000	44652000	3	1	2
SPAC26A3.09c|rga2|I|Rho-type	SPAC26A3.09c|rga2|I|Rho-type	1	1	1	>SPAC26A3.09c|rga2|I|Rho-type GTPase activating protein Rga2	1	1	1	1	0	1	1	1	0	1	1	1	0	1	1	1	0.6	0.6	0.6	143.59	1275	1275	0.003885	2.3906	By matching	By MS/MS	By MS/MS	By MS/MS	0	0.6	0.6	0.6	76891000	0	22367000	39316000	15208000	0	0	0	15208000	0	1	1
SPAC26A3.10|cnt6|I|centaurin	SPAC26A3.10|cnt6|I|centaurin	3	3	3	>SPAC26A3.10|cnt6|I|centaurin ADOP ribosylation factor GTPase activating protein family (predicted)	1	3	3	3	0	3	1	2	0	3	1	2	0	3	1	2	4.4	4.4	4.4	104.5	923	923	0	8.9141	By matching	By MS/MS	By MS/MS	By MS/MS	0	4.4	1.7	2.7	15477000	0	7426400	4762900	3287700	0	6498200	0	0	0	3	1
SPAC26A3.15c|nsp1|I|nucleoporin	SPAC26A3.15c|nsp1|I|nucleoporin	12	12	12	>SPAC26A3.15c|nsp1|I|nucleoporin Nsp1	1	12	12	12	11	9	3	7	11	9	3	7	11	9	3	7	27.9	27.9	27.9	60.73	598	598	0	52.507	By MS/MS	By MS/MS	By MS/MS	By MS/MS	25.9	22.2	6	14.9	226400000	112210000	73809000	20632000	19747000	82506000	59181000	27394000	25515000	11	7	2
SPAC26F1.03|pda1|I|pyruvate	SPAC26F1.03|pda1|I|pyruvate	3	3	3	>SPAC26F1.03|pda1|I|pyruvate dehydrogenase e1 component alpha subunit Pda1 (predicted)	1	3	3	3	3	3	2	1	3	3	2	1	3	3	2	1	12.2	12.2	12.2	45.137	409	409	0	5.7123	By MS/MS	By matching	By MS/MS	By matching	12.2	12.2	6.4	4.2	28854000	11964000	8575100	6702000	1613700	9230800	6216900	7540800	0	3	0	2
SPAC26F1.06|gpm1|I|monomeric	SPAC26F1.06|gpm1|I|monomeric	16	16	16	>SPAC26F1.06|gpm1|I|monomeric 2,3-bisphosphoglycerate (BPG)-dependent phosphoglycerate mutase (PGAM), Gpm1	1	16	16	16	14	15	14	14	14	15	14	14	14	15	14	14	78.7	78.7	78.7	23.765	211	211	0	151.39	By MS/MS	By MS/MS	By MS/MS	By MS/MS	76.8	72.5	76.8	72.5	1751000000	465200000	438050000	425990000	421760000	339980000	350250000	311370000	415450000	20	21	16
SPAC26F1.07|SPAC26F1.07|I|glucose	SPAC26F1.07|SPAC26F1.07|I|glucose	4	4	4	>SPAC26F1.07|SPAC26F1.07|I|glucose 1-dehydrogenase (NADP+) (predicted)	1	4	4	4	2	1	1	3	2	1	1	3	2	1	1	3	14.3	14.3	14.3	36.192	321	321	0	8.181	By MS/MS	By MS/MS	By MS/MS	By MS/MS	7.8	2.5	2.8	11.5	10216000	3871900	1281200	736060	4327200	0	0	0	4327200	1	1	1
SPAC26F1.09|gyp51|I|GTPase	SPAC26F1.09|gyp51|I|GTPase	1	1	1	>SPAC26F1.09|gyp51|I|GTPase activating protein Gyp51 (predicted)	1	1	1	1	1	1	1	1	1	1	1	1	1	1	1	1	1.5	1.5	1.5	116.29	1031	1031	0.0008071	2.8222	By MS/MS	By matching	By matching	By matching	1.5	1.5	1.5	1.5	8749600	2471800	3370500	2029500	877830	0	0	0	877830	1	0	0
SPAC26F1.13c|lrs1|I|cytoplasmic	SPAC26F1.13c|lrs1|I|cytoplasmic	19	19	19	>SPAC26F1.13c|lrs1|I|cytoplasmic leucine-tRNA ligase Lrs1 (predicted)	1	19	19	19	14	13	14	11	14	13	14	11	14	13	14	11	22.1	22.1	22.1	126.45	1111	1111	0	125.59	By MS/MS	By MS/MS	By MS/MS	By MS/MS	18.3	16.9	15.7	14.9	343530000	84677000	102890000	80566000	75400000	60501000	85279000	68886000	87809000	10	14	10
SPAC26H5.07c|SPAC26H5.07c|I|seven	SPAC26H5.07c|SPAC26H5.07c|I|seven	5	5	5	>SPAC26H5.07c|SPAC26H5.07c|I|seven transmembrane receptor protein (predicted)	1	5	5	5	5	5	4	5	5	5	4	5	5	5	4	5	11.9	11.9	11.9	56.858	505	505	0	25.666	By MS/MS	By MS/MS	By MS/MS	By MS/MS	11.9	11.9	8.1	11.9	276380000	75655000	73866000	63263000	63600000	59721000	61719000	58281000	63057000	6	4	4
SPAC26H5.09c|SPAC26H5.09c|I|oxidoreductase	SPAC26H5.09c|SPAC26H5.09c|I|oxidoreductase	7	7	7	>SPAC26H5.09c|SPAC26H5.09c|I|oxidoreductase involved in NADPH regeneration (predicted)	1	7	7	7	6	7	6	5	6	7	6	5	6	7	6	5	24.7	24.7	24.7	41.432	369	369	0	38.874	By MS/MS	By MS/MS	By MS/MS	By MS/MS	21.4	24.7	21.4	17.6	188170000	65235000	46018000	46061000	30858000	44028000	35900000	33638000	38032000	6	7	3
SPAC26H5.10c|tif51|I|translation	SPAC26H5.10c|tif51|I|translation	3	3	2	>SPAC26H5.10c|tif51|I|translation elongation factor eIF5A (predicted)	1	3	3	2	2	3	3	1	2	3	3	1	1	2	2	0	21.7	21.7	14	17.152	157	157	0	33.779	By MS/MS	By MS/MS	By MS/MS	By MS/MS	19.1	21.7	21.7	7.6	202760000	52135000	61192000	53425000	36011000	40408000	44886000	38031000	53772000	6	6	5
SPAC26H5.12|rpo41|I|mitochondrial	SPAC26H5.12|rpo41|I|mitochondrial	1	1	1	>SPAC26H5.12|rpo41|I|mitochondrial RNA polymerase Rpo41	1	1	1	1	0	1	0	1	0	1	0	1	0	1	0	1	0.6	0.6	0.6	131.5	1154	1154	0.0090498	2.1473	By matching	By MS/MS	By matching	By MS/MS	0	0.6	0	0.6	0	0	0	0	0	0	0	0	0	0	1	0
SPAC27D7.02c|grp1|I|GRIP	SPAC27D7.02c|grp1|I|GRIP	7	7	7	>SPAC27D7.02c|grp1|I|GRIP domain protein Grp1 (predicted)	1	7	7	7	6	3	4	4	6	3	4	4	6	3	4	4	12	12	12	87.264	750	750	0	40.668	By MS/MS	By MS/MS	By MS/MS	By MS/MS	9.7	4	6.3	6.4	36246000	15865000	4574600	6733700	9072500	7891600	11189000	5654300	7091300	4	3	3
SPAC27D7.14c|tpr1|I|RNA	SPAC27D7.14c|tpr1|I|RNA	9	9	9	>SPAC27D7.14c|tpr1|I|RNA polymerase II associated Paf1 complex subunit Tpr1	1	9	9	9	7	7	5	4	7	7	5	4	7	7	5	4	10.2	10.2	10.2	119.15	1039	1039	0	25.278	By MS/MS	By MS/MS	By MS/MS	By MS/MS	7.6	8.5	5.1	4.3	59043000	19850000	16491000	13241000	9460900	14177000	12901000	11985000	12279000	5	7	6
SPAC27E2.03c|SPAC27E2.03c|I|Obg-Like	SPAC27E2.03c|SPAC27E2.03c|I|Obg-Like	5	5	5	>SPAC27E2.03c|SPAC27E2.03c|I|Obg-Like ATPase (predicted)	1	5	5	5	4	3	3	3	4	3	3	3	4	3	3	3	17.6	17.6	17.6	44.332	392	392	0	16.062	By MS/MS	By MS/MS	By MS/MS	By MS/MS	15.1	9.9	9.9	10.7	79163000	32051000	13476000	15791000	17846000	18103000	15332000	16889000	19006000	4	5	3
SPAC27E2.09|mak2|I|histidine	SPAC27E2.09|mak2|I|histidine	6	6	6	>SPAC27E2.09|mak2|I|histidine kinase Mak2	1	6	6	6	3	3	4	5	3	3	4	5	3	3	4	5	2.9	2.9	2.9	264.62	2310	2310	0	13.522	By MS/MS	By MS/MS	By MS/MS	By MS/MS	1.6	1.4	2	2.4	48672000	13496000	5702600	15611000	13862000	11925000	0	14342000	11733000	2	1	3
SPAC29A4.02c|SPAC29A4.02c|I|translation	SPAC29A4.02c|SPAC29A4.02c|I|translation	18	18	18	>SPAC29A4.02c|SPAC29A4.02c|I|translation elongation factor EF-1 gamma subunit	1	18	18	18	18	17	16	17	18	17	16	17	18	17	16	17	59.2	59.2	59.2	45.701	409	409	0	248.6	By MS/MS	By MS/MS	By MS/MS	By MS/MS	59.2	57	57.5	57	2399700000	629590000	646070000	576350000	547730000	485290000	571620000	464740000	587970000	22	22	18
SPAC29A4.04c|cbf5|I|pseudouridylate	SPAC29A4.04c|cbf5|I|pseudouridylate	3	3	3	>SPAC29A4.04c|cbf5|I|pseudouridylate synthase Cbf5 (predicted)	1	3	3	3	1	3	2	1	1	3	2	1	1	3	2	1	8	8	8	53.11	474	474	0	8.8674	By MS/MS	By MS/MS	By MS/MS	By MS/MS	2.7	8	5.3	2.3	16926000	3033300	7703400	3789100	2400000	0	6740600	0	0	1	1	1
SPAC29A4.11|rga3|I|Rho-type	SPAC29A4.11|rga3|I|Rho-type	5	5	5	>SPAC29A4.11|rga3|I|Rho-type GTPase activating protein Rga3	1	5	5	5	3	3	3	4	3	3	3	4	3	3	3	4	7.5	7.5	7.5	108.65	969	969	0	39.439	By MS/MS	By MS/MS	By MS/MS	By MS/MS	4.4	3.8	3.8	6.4	30464000	6335800	6862400	7905600	9360500	0	6155700	6233800	9524100	2	1	1
SPAC29A4.15|srs1|I|cytoplasmic	SPAC29A4.15|srs1|I|cytoplasmic	11	11	11	>SPAC29A4.15|srs1|I|cytoplasmic serine-tRNA ligase Srs1 (predicted)	1	11	11	11	8	9	10	7	8	9	10	7	8	9	10	7	31.1	31.1	31.1	51.642	450	450	0	87.729	By MS/MS	By MS/MS	By MS/MS	By MS/MS	17.6	25.1	24.7	19.8	298270000	80187000	82166000	68107000	67813000	81296000	60527000	62829000	58053000	7	6	11
SPAC29A4.16|hal4|I|serine/threonine	SPAC29A4.16|hal4|I|serine/threonine	4	4	4	>SPAC29A4.16|hal4|I|serine/threonine protein kinase Hal4	1	4	4	4	2	1	3	2	2	1	3	2	2	1	3	2	8.5	8.5	8.5	69.114	636	636	0	18.009	By MS/MS	By MS/MS	By MS/MS	By MS/MS	3.3	1.1	5.8	3.8	167180000	42636000	35893000	40959000	47694000	42692000	0	26637000	0	2	1	2
SPAC29A4.18|prw1|I|Clr6	SPAC29A4.18|prw1|I|Clr6	10	10	10	>SPAC29A4.18|prw1|I|Clr6 histone deacetylase complex subunit Prw1	1	10	10	10	9	10	9	8	9	10	9	8	9	10	9	8	36.7	36.7	36.7	48.476	431	431	0	46.347	By MS/MS	By MS/MS	By MS/MS	By MS/MS	32.3	36.7	29.9	29.7	432210000	108910000	101870000	115120000	106300000	93515000	84353000	90973000	112400000	9	9	10
SPAC29A4.20|elp3|I|elongator	SPAC29A4.20|elp3|I|elongator	8	8	8	>SPAC29A4.20|elp3|I|elongator complex subunit Elp3 (predicted)	1	8	8	8	5	6	4	7	5	6	4	7	5	6	4	7	16.5	16.5	16.5	61.849	544	544	0	21.281	By MS/MS	By MS/MS	By MS/MS	By MS/MS	10.5	10.8	7.5	14.9	72735000	19167000	17447000	15021000	21100000	15701000	16441000	13089000	19492000	4	4	2
SPAC29B12.01|ino80|I|SNF2	SPAC29B12.01|ino80|I|SNF2	8	8	8	>SPAC29B12.01|ino80|I|SNF2 family ATP-dependent 3 to 5 DNA helicase Ino80	1	8	8	8	3	5	7	5	3	5	7	5	3	5	7	5	5.2	5.2	5.2	183.05	1604	1604	0	26.116	By MS/MS	By MS/MS	By MS/MS	By MS/MS	2.1	3.2	4.7	3.2	51175000	7198100	10439000	16133000	17404000	8447800	11399000	10888000	15144000	3	4	7
SPAC29B12.04|snz1|I|pyridoxine	SPAC29B12.04|snz1|I|pyridoxine	9	9	9	>SPAC29B12.04|snz1|I|pyridoxine biosynthesis protein	1	9	9	9	9	7	9	6	9	7	9	6	9	7	9	6	31.8	31.8	31.8	31.403	296	296	0	38.693	By MS/MS	By MS/MS	By MS/MS	By MS/MS	31.8	26.7	31.8	22	238440000	66462000	66303000	69077000	36595000	46209000	55257000	50067000	48116000	11	7	7
SPAC29B12.07|sec16|I|multidomain	SPAC29B12.07|sec16|I|multidomain	2	2	2	>SPAC29B12.07|sec16|I|multidomain vesicle coat component Sec16 (predicted)	1	2	2	2	0	2	1	2	0	2	1	2	0	2	1	2	1.2	1.2	1.2	218.09	1995	1995	0	6.449	By matching	By MS/MS	By matching	By MS/MS	0	1.2	0.6	1.2	14774000	0	4947000	1746000	8081300	0	4339500	0	8070600	0	1	0
SPAC29B12.08|clr5|I|Clr5	SPAC29B12.08|clr5|I|Clr5	1	1	1	>SPAC29B12.08|clr5|I|Clr5 protein	1	1	1	1	1	1	1	1	1	1	1	1	1	1	1	1	1.9	1.9	1.9	75.679	689	689	0	4.0474	By MS/MS	By MS/MS	By MS/MS	By MS/MS	1.9	1.9	1.9	1.9	20985000	5428000	4780900	5008200	5768300	0	0	0	5768300	1	1	1
SPAC29E6.06c|SPAC29E6.06c|I|cytoplasmic	SPAC29E6.06c|SPAC29E6.06c|I|cytoplasmic	3	3	3	>SPAC29E6.06c|SPAC29E6.06c|I|cytoplasmic cysteine-tRNA ligase Crs1 (predicted)	1	3	3	3	1	3	1	3	1	3	1	3	1	3	1	3	5.3	5.3	5.3	85.554	754	754	0	5.593	By matching	By MS/MS	By matching	By matching	2.1	5.3	2.1	5.3	153160000	46735000	48402000	35132000	22895000	0	37631000	0	27616000	0	3	0
SPAC29E6.08|tbp1|I|TATA-binding	SPAC29E6.08|tbp1|I|TATA-binding	2	2	2	>SPAC29E6.08|tbp1|I|TATA-binding protein (TBP)	1	2	2	2	2	1	1	2	2	1	1	2	2	1	1	2	11.7	11.7	11.7	25.442	231	231	0	4.9919	By MS/MS	By MS/MS	By matching	By MS/MS	11.7	8.7	8.7	11.7	14204000	2334800	3518200	2921100	5429700	0	0	0	5429700	1	0	0
SPAC2C4.10c|csc4|I|SIP/FAR	SPAC2C4.10c|csc4|I|SIP/FAR	1	1	1	>SPAC2C4.10c|csc4|I|SIP/FAR complex subunit, Csc4	1	1	1	1	1	0	1	0	1	0	1	0	1	0	1	0	4.8	4.8	4.8	19.686	166	166	0.0039093	2.4411	By MS/MS	By matching	By MS/MS	By matching	4.8	0	4.8	0	10038000	4726200	0	5311900	0	0	0	4400000	0	1	0	1
SPAC2C4.13|vma16|I|V-type	SPAC2C4.13|vma16|I|V-type	1	1	1	>SPAC2C4.13|vma16|I|V-type ATPase V0 subunit c (predicted)	1	1	1	1	1	1	1	1	1	1	1	1	1	1	1	1	6	6	6	20.885	199	199	0	3.4038	By MS/MS	By MS/MS	By MS/MS	By matching	6	6	6	6	10973000	2778200	2146100	2281900	3766600	0	0	0	3766600	1	1	1
SPAC521.05|rps802|I|40S;SPAC2C4.16c|rps801|I|40S	SPAC521.05|rps802|I|40S;SPAC2C4.16c|rps801|I|40S	6;6	6;6	6;6	>SPAC521.05|rps802|I|40S ribosomal protein S8 (predicted);>SPAC2C4.16c|rps801|I|40S ribosomal protein S8 (predicted)	2	6	6	6	4	5	5	4	4	5	5	4	4	5	5	4	41.5	41.5	41.5	22.564	200	200;200	0	47.777	By MS/MS	By MS/MS	By MS/MS	By MS/MS	27.5	34.5	34.5	27.5	132990000	35169000	41371000	43756000	12692000	26956000	29994000	28391000	28997000	3	3	4
SPAC2E1P3.04|cao1|I|copper	SPAC2E1P3.04|cao1|I|copper	24	24	23	>SPAC2E1P3.04|cao1|I|copper amine oxidase Cao1	1	24	24	23	21	22	22	19	21	22	22	19	20	21	21	18	47.5	47.5	45.8	81.24	712	712	0	168.28	By MS/MS	By MS/MS	By MS/MS	By MS/MS	39.5	41	39.6	34	1495100000	396840000	348920000	437480000	311830000	296560000	282340000	370950000	355220000	23	25	27
SPAC2F3.06c|kap104|I|karyopherin	SPAC2F3.06c|kap104|I|karyopherin	1	1	1	>SPAC2F3.06c|kap104|I|karyopherin Kap104	1	1	1	1	1	1	1	0	1	1	1	0	1	1	1	0	1.1	1.1	1.1	101.72	910	910	0.00081699	2.9382	By MS/MS	By MS/MS	By MS/MS	By matching	1.1	1.1	1.1	0	3817700	2633800	0	1183900	0	0	0	980670	0	1	1	1
SPAC2F3.09|hem1|I|5-aminolevulinate	SPAC2F3.09|hem1|I|5-aminolevulinate	12	12	12	>SPAC2F3.09|hem1|I|5-aminolevulinate synthase Hem1	1	12	12	12	9	11	6	9	9	11	6	9	9	11	6	9	33.2	33.2	33.2	60.959	558	558	0	104.3	By MS/MS	By MS/MS	By MS/MS	By MS/MS	26.5	31.4	19.4	22.8	361310000	82816000	121120000	75211000	82165000	61546000	83602000	64214000	98342000	7	12	4
SPAC2F3.10|vps54|I|GARP	SPAC2F3.10|vps54|I|GARP	3	3	3	>SPAC2F3.10|vps54|I|GARP complex subunit Vps54 (predicted)	1	3	3	3	0	2	0	1	0	2	0	1	0	2	0	1	4.4	4.4	4.4	107.95	949	949	0	4.6109	By matching	By MS/MS	By matching	By MS/MS	0	2.7	0	1.7	1263400	0	0	0	1263400	0	0	0	1263400	0	2	0
SPAC2F7.03c|pom1|I|DYRK	SPAC2F7.03c|pom1|I|DYRK	6	6	6	>SPAC2F7.03c|pom1|I|DYRK family protein kinase Pom1	1	6	6	6	2	2	2	6	2	2	2	6	2	2	2	6	8.8	8.8	8.8	121.14	1087	1087	0	21.47	By MS/MS	By MS/MS	By MS/MS	By MS/MS	3.8	3.8	3.8	8.8	41257000	9495100	7646700	9755600	14360000	9737900	7773700	8652400	10852000	2	2	2
SPAC2F7.04|pmc2|I|mediator	SPAC2F7.04|pmc2|I|mediator	1	1	1	>SPAC2F7.04|pmc2|I|mediator complex subunit Med1	1	1	1	1	1	0	0	1	1	0	0	1	1	0	0	1	2.9	2.9	2.9	51.389	454	454	0	3.4662	By matching	By matching	By matching	By MS/MS	2.9	0	0	2.9	5781100	1674100	0	0	4107000	0	0	0	4107000	0	0	0
SPAC2F7.05c|tif5|I|translation	SPAC2F7.05c|tif5|I|translation	2	2	2	>SPAC2F7.05c|tif5|I|translation initiation factor eIF5, Tif5(predicted)	1	2	2	2	2	2	2	1	2	2	2	1	2	2	2	1	4.6	4.6	4.6	44.944	395	395	0	8.4552	By MS/MS	By MS/MS	By MS/MS	By matching	4.6	4.6	4.6	2	14361000	5825000	3124300	4038700	1373500	4860000	0	3322000	0	1	1	3
SPAC2F7.08c|snf5|I|SWI/SNF	SPAC2F7.08c|snf5|I|SWI/SNF	2	2	2	>SPAC2F7.08c|snf5|I|SWI/SNF complex subunit Snf5	1	2	2	2	2	1	1	1	2	1	1	1	2	1	1	1	2.5	2.5	2.5	71.915	632	632	0	5.3123	By MS/MS	By MS/MS	By MS/MS	By MS/MS	2.5	1.1	1.1	1.1	11480000	5142100	1822100	1973000	2542500	4269600	0	0	0	2	1	1
SPAC2F7.13c|wrs1|I|cytoplasmic	SPAC2F7.13c|wrs1|I|cytoplasmic	5	5	5	>SPAC2F7.13c|wrs1|I|cytoplasmic tryptophan-tRNA ligase Wrs1 (predicted)	1	5	5	5	4	5	3	3	4	5	3	3	4	5	3	3	17.5	17.5	17.5	44.91	395	395	0	16.675	By MS/MS	By MS/MS	By MS/MS	By MS/MS	11.4	17.5	8.1	8.1	46030000	10157000	13988000	11055000	10830000	9405900	10106000	9679300	11469000	3	4	3
SPAC2F7.16c|pld1|I|phospholipase	SPAC2F7.16c|pld1|I|phospholipase	1	1	1	>SPAC2F7.16c|pld1|I|phospholipase D, Pld1	1	1	1	1	1	1	1	0	1	1	1	0	1	1	1	0	0.9	0.9	0.9	157.73	1369	1369	0	3.8217	By MS/MS	By matching	By MS/MS	By matching	0.9	0.9	0.9	0	12846000	3196700	3225500	6423500	0	0	0	5320800	0	1	0	0
SPAC2G11.02|urb2|I|ribosome	SPAC2G11.02|urb2|I|ribosome	6	6	6	>SPAC2G11.02|urb2|I|ribosome biogenesis protein Urb2 (predicted)	1	6	6	6	4	4	4	3	4	4	4	3	4	4	4	3	5	5	5	151.57	1318	1318	0	13.126	By MS/MS	By MS/MS	By MS/MS	By MS/MS	3.2	3.3	3.5	2.6	32675000	4998300	11480000	7924000	8272100	5804300	9751800	6893500	6582100	4	3	3
SPAC2G11.06|vps4|I|AAA	SPAC2G11.06|vps4|I|AAA	1	1	1	>SPAC2G11.06|vps4|I|AAA family ATPase Vps4 (predicted)	1	1	1	1	1	1	1	1	1	1	1	1	1	1	1	1	3.5	3.5	3.5	48.401	432	432	0	3.5814	By matching	By MS/MS	By MS/MS	By matching	3.5	3.5	3.5	3.5	14301000	3313800	4151500	2677800	4158300	0	0	0	4158300	0	1	0
SPAC2G11.07c|ptc3|I|protein	SPAC2G11.07c|ptc3|I|protein	2	2	2	>SPAC2G11.07c|ptc3|I|protein phosphatase 2c homolog 3	1	2	2	2	2	2	1	1	2	2	1	1	2	2	1	1	5.1	5.1	5.1	44.856	414	414	0	4.6802	By MS/MS	By MS/MS	By MS/MS	By matching	5.1	5.1	2.4	2.7	13742000	5911200	3135700	3066500	1628600	4908300	0	0	0	2	2	1
SPAC2G11.09|SPAC2G11.09|I|calcium	SPAC2G11.09|SPAC2G11.09|I|calcium	3	3	3	>SPAC2G11.09|SPAC2G11.09|I|calcium ion transmembrane transporter (predicted)	1	3	3	3	0	2	2	0	0	2	2	0	0	2	2	0	4.2	4.2	4.2	90.572	793	793	0	7.8191	By matching	By MS/MS	By MS/MS	By matching	0	2.5	2.9	0	5411300	0	4074300	1337000	0	0	0	1107500	0	0	2	2
SPAC30.01c|sec72|I|Sec7	SPAC30.01c|sec72|I|Sec7	11	11	11	>SPAC30.01c|sec72|I|Sec7 domain protein, ARF GEF Sec72	1	11	11	11	11	7	7	5	11	7	7	5	11	7	7	5	7.5	7.5	7.5	206.8	1822	1822	0	54.938	By MS/MS	By MS/MS	By MS/MS	By MS/MS	7.5	4.2	4.7	3.2	82518000	22347000	19009000	27816000	13346000	16004000	20535000	16730000	18307000	8	5	7
SPAC30.04c|abc4|I|glutathione	SPAC30.04c|abc4|I|glutathione	5	5	5	>SPAC30.04c|abc4|I|glutathione S-conjugate-exporting ATPase Abc4	1	5	5	5	5	4	4	4	5	4	4	4	5	4	4	4	3.7	3.7	3.7	164.79	1469	1469	0	17.063	By MS/MS	By MS/MS	By MS/MS	By MS/MS	3.7	3	3	3	65946000	20573000	14401000	15720000	15252000	14196000	14071000	16122000	13568000	4	3	3
SPAC30C2.04|asc1|I|cofactor	SPAC30C2.04|asc1|I|cofactor	4	4	4	>SPAC30C2.04|asc1|I|cofactor for cytoplasmic methionyl-and glutamyl-tRNA synthetases Asc1 (predicted)	1	4	4	4	4	4	3	2	4	4	3	2	4	4	3	2	11.8	11.8	11.8	50.606	450	450	0	11.553	By MS/MS	By MS/MS	By MS/MS	By MS/MS	11.8	11.8	7.8	4	52310000	14176000	17083000	15637000	5414300	12843000	11239000	15588000	0	1	3	2
SPAC30C2.05|erv14|I|cornichon	SPAC30C2.05|erv14|I|cornichon	1	1	1	>SPAC30C2.05|erv14|I|cornichon family protein Erv14 (predicted)	1	1	1	1	1	1	1	1	1	1	1	1	1	1	1	1	8	8	8	15.99	137	137	0	3.919	By MS/MS	By MS/MS	By MS/MS	By MS/MS	8	8	8	8	10940000	1940400	2825300	3081000	3093100	0	0	0	3093100	1	1	1
SPAC30C2.08|SPAC30C2.08|I|conserved	SPAC30C2.08|SPAC30C2.08|I|conserved	5	5	5	>SPAC30C2.08|SPAC30C2.08|I|conserved fungal protein	1	5	5	5	3	3	3	3	3	3	3	3	3	3	3	3	10.9	10.9	10.9	52.69	457	457	0	11.149	By MS/MS	By MS/MS	By MS/MS	By MS/MS	7.7	5.5	5.7	5.5	41815000	12240000	10025000	13458000	6091400	9539600	9987800	9121900	7525300	3	3	1
SPAC30D11.09|cwf19|I|complexed	SPAC30D11.09|cwf19|I|complexed	1	1	1	>SPAC30D11.09|cwf19|I|complexed with Cdc5 protein Cwf19	1	1	1	1	1	0	1	1	1	0	1	1	1	0	1	1	1.6	1.6	1.6	74.419	639	639	0	4.3838	By MS/MS	By matching	By MS/MS	By MS/MS	1.6	0	1.6	1.6	12473000	4913800	0	7559100	0	0	0	6261500	0	1	0	1
SPAC30D11.11|SPAC30D11.11|I|Haemolysin-III	SPAC30D11.11|SPAC30D11.11|I|Haemolysin-III	3	3	3	>SPAC30D11.11|SPAC30D11.11|I|Haemolysin-III family protein (predicted)	1	3	3	3	2	2	2	2	2	2	2	2	2	2	2	2	7.7	7.7	7.7	51.056	442	442	0	10.96	By MS/MS	By MS/MS	By MS/MS	By MS/MS	3.4	5.9	5.9	3.4	20760000	3957400	2257400	10332000	4212900	3286900	0	0	4211900	2	2	1
SPAC30D11.12|rpl3802|I|60S	SPAC30D11.12|rpl3802|I|60S	2	1	1	>SPAC30D11.12|rpl3802|I|60S ribosomal protein L38 (predicted)	1	2	1	1	2	2	2	2	1	1	1	1	1	1	1	1	33.8	18.9	18.9	8.3388	74	74	0.0038941	2.4163	By matching	By matching	By matching	By MS/MS	33.8	33.8	33.8	33.8	23182000	4654100	7200400	5759700	5568000	0	0	0	5568000	0	0	0
SPAC31A2.04c|pre1|I|20S	SPAC31A2.04c|pre1|I|20S	2	2	2	>SPAC31A2.04c|pre1|I|20S proteasome complex subunit beta 4 Pre1 (predicted)	1	2	2	2	1	2	0	2	1	2	0	2	1	2	0	2	14.4	14.4	14.4	21.967	194	194	0	8.0981	By matching	By MS/MS	By matching	By MS/MS	6.7	14.4	0	14.4	26267000	7674300	11810000	0	6783300	0	10027000	0	7089700	0	1	0
SPAC31G5.04|lys12|I|homoisocitrate	SPAC31G5.04|lys12|I|homoisocitrate	6	6	6	>SPAC31G5.04|lys12|I|homoisocitrate dehydrogenase Lys12	1	6	6	6	5	6	5	5	5	6	5	5	5	6	5	5	16.9	16.9	16.9	39.256	362	362	0	23.03	By MS/MS	By MS/MS	By MS/MS	By MS/MS	14.4	16.9	14.4	16.6	157270000	46241000	48898000	29823000	32307000	35239000	41305000	26665000	34983000	5	7	4
SPAC31G5.05c|SPAC31G5.05c|I|ribulose	SPAC31G5.05c|SPAC31G5.05c|I|ribulose	1	1	1	>SPAC31G5.05c|SPAC31G5.05c|I|ribulose phosphate 3-epimerase (predicted)	1	1	1	1	1	1	1	1	1	1	1	1	1	1	1	1	6.6	6.6	6.6	25.205	228	228	0.0023678	2.5446	By matching	By MS/MS	By matching	By MS/MS	6.6	6.6	6.6	6.6	29252000	9905300	7402000	6325900	5618600	0	0	0	5618600	0	1	0
SPAC31G5.13|rpn11|I|19S	SPAC31G5.13|rpn11|I|19S	3	3	3	>SPAC31G5.13|rpn11|I|19S proteasome regulatory subunit Rpn11	1	3	3	3	2	2	2	2	2	2	2	2	2	2	2	2	14.3	14.3	14.3	34.572	308	308	0	10.483	By MS/MS	By MS/MS	By MS/MS	By MS/MS	10.1	10.1	8.4	10.1	51368000	11375000	9289900	18110000	12593000	9526700	9163500	0	11477000	1	1	2
SPAC31G5.14|gcv1|I|glycine	SPAC31G5.14|gcv1|I|glycine	4	4	4	>SPAC31G5.14|gcv1|I|glycine decarboxylase T subunit (predicted)	1	4	4	4	2	3	4	3	2	3	4	3	2	3	4	3	12.1	12.1	12.1	42.408	387	387	0	12.565	By MS/MS	By MS/MS	By MS/MS	By MS/MS	5.2	7.8	12.1	7.8	33018000	9997800	5823400	12646000	4551200	11420000	5979200	5633600	5390400	2	2	3
SPAC31G5.16c|dpm1|I|dolichol-phosphate	SPAC31G5.16c|dpm1|I|dolichol-phosphate	1	1	1	>SPAC31G5.16c|dpm1|I|dolichol-phosphate mannosyltransferase catalytic subunit Dpm1	1	1	1	1	1	1	1	1	1	1	1	1	1	1	1	1	5.1	5.1	5.1	26.672	236	236	0	3.4003	By MS/MS	By MS/MS	By matching	By MS/MS	5.1	5.1	5.1	5.1	5767700	2224700	0	1699200	1843800	0	0	0	1843800	1	1	0
SPAC31G5.17c|rps1001|I|40S	SPAC31G5.17c|rps1001|I|40S	5	5	3	>SPAC31G5.17c|rps1001|I|40S ribosomal protein S10 (predicted)	1	5	5	3	5	4	4	4	5	4	4	4	3	2	2	2	40.3	40.3	20.8	16.275	144	144	0	25.916	By MS/MS	By MS/MS	By MS/MS	By MS/MS	40.3	39.6	39.6	40.3	274700000	75838000	57358000	65757000	75748000	69356000	46970000	62391000	64659000	6	5	4
SPAC323.04|SPAC323.04|I|mitochondrial	SPAC323.04|SPAC323.04|I|mitochondrial	4	4	4	>SPAC323.04|SPAC323.04|I|mitochondrial ATPase (predicted)	1	4	4	4	3	3	3	4	3	3	3	4	3	3	3	4	9	9	9	54.841	487	487	0	17.688	By MS/MS	By MS/MS	By MS/MS	By MS/MS	7.6	7.6	7.6	9	65834000	14250000	21662000	10508000	19414000	13204000	20530000	0	16467000	2	1	1
SPAC323.07c|SPAC323.07c|I|MatE	SPAC323.07c|SPAC323.07c|I|MatE	2	2	2	>SPAC323.07c|SPAC323.07c|I|MatE family transmembrane transporter (predicted)	1	2	2	2	2	1	2	1	2	1	2	1	2	1	2	1	4.7	4.7	4.7	58.597	533	533	0	15.096	By MS/MS	By MS/MS	By MS/MS	By MS/MS	4.7	1.5	4.7	1.5	37617000	13756000	7473300	16387000	0	11882000	0	13115000	0	2	1	2
SPAC328.03|tps1|I|alpha,alpha-trehalose-phosphate	SPAC328.03|tps1|I|alpha,alpha-trehalose-phosphate	15	15	15	>SPAC328.03|tps1|I|alpha,alpha-trehalose-phosphate synthase [UDP-forming]	1	15	15	15	14	14	14	12	14	14	14	12	14	14	14	12	32	32	32	58.493	513	513	0	200.4	By MS/MS	By MS/MS	By MS/MS	By MS/MS	30	32	32	30	812880000	221920000	205310000	206080000	179570000	163280000	189900000	159860000	201160000	14	12	13
SPAC328.06|ubp2|I|ubiquitin	SPAC328.06|ubp2|I|ubiquitin	20	20	20	>SPAC328.06|ubp2|I|ubiquitin C-terminal hydrolase Ubp2	1	20	20	20	13	13	12	13	13	13	12	13	13	13	12	13	23.9	23.9	23.9	130.3	1141	1141	0	76.207	By MS/MS	By MS/MS	By MS/MS	By MS/MS	15.2	15.1	14	16	308100000	68454000	80802000	74645000	84204000	53667000	74454000	56592000	88863000	10	12	7
SPAC328.10c|rps502|I|40S;SPAC8C9.08|rps5|I|40S	SPAC328.10c|rps502|I|40S;SPAC8C9.08|rps5|I|40S	9;8	9;8	9;8	>SPAC328.10c|rps502|I|40S ribosomal protein S5 (predicted);>SPAC8C9.08|rps5|I|40S ribosomal protein S5 (predicted)	2	9	9	9	9	8	9	8	9	8	9	8	9	8	9	8	39.9	39.9	39.9	22.357	203	203;203	0	116.41	By MS/MS	By MS/MS	By MS/MS	By MS/MS	39.9	34.5	39.9	34.5	499750000	135900000	119390000	143580000	100880000	116120000	113330000	113600000	94064000	10	7	11
SPAC343.04c|gid7|I|GID	SPAC343.04c|gid7|I|GID	3	3	3	>SPAC343.04c|gid7|I|GID complex subunit Gid7 (predicted)	1	3	3	3	3	2	2	2	3	2	2	2	3	2	2	2	7.5	7.5	7.5	58.403	507	507	0	10.604	By MS/MS	By MS/MS	By MS/MS	By MS/MS	7.5	5.1	5.1	5.1	22511000	4530000	6074300	6702600	5203900	3995300	5112000	5211800	5513200	2	2	1
SPAC343.05|vma1|I|V-type	SPAC343.05|vma1|I|V-type	13	13	13	>SPAC343.05|vma1|I|V-type ATPase V1 domain, subunit A	1	13	13	13	10	8	10	7	10	8	10	7	10	8	10	7	29.1	29.1	29.1	68.805	619	619	0	64.434	By MS/MS	By MS/MS	By MS/MS	By MS/MS	23.4	21.5	21.6	18.1	214820000	56808000	53887000	59234000	44892000	43549000	44753000	46942000	53036000	7	7	8
SPAC343.16|lys2|I|homoaconitate	SPAC343.16|lys2|I|homoaconitate	3	3	3	>SPAC343.16|lys2|I|homoaconitate hydratase Lys2	1	3	3	3	3	3	3	1	3	3	3	1	3	3	3	1	4.9	4.9	4.9	78.024	721	721	0	8.7938	By MS/MS	By MS/MS	By MS/MS	By MS/MS	4.9	4.9	4.9	1.2	75056000	21756000	24857000	26189000	2253500	17695000	23692000	20122000	0	3	2	4
SPAC3A11.07|nde2|I|mitochondrial	SPAC3A11.07|nde2|I|mitochondrial	14	14	14	>SPAC3A11.07|nde2|I|mitochondrial NADH dehydrogenase (ubiquinone) Nde2 (predicted)	1	14	14	14	13	12	13	10	13	12	13	10	13	12	13	10	31.8	31.8	31.8	61.674	551	551	0	82.383	By MS/MS	By MS/MS	By MS/MS	By MS/MS	31.8	28.5	29.8	22.7	394060000	94240000	99742000	112710000	87364000	79990000	90257000	82500000	82345000	13	13	15
SPAC3A11.10c|dpe1|I|dipeptidyl	SPAC3A11.10c|dpe1|I|dipeptidyl	7	7	7	>SPAC3A11.10c|dpe1|I|dipeptidyl peptidase (predicted)	1	7	7	7	6	6	4	5	6	6	4	5	6	6	4	5	22.5	22.5	22.5	46.047	409	409	0	35.476	By MS/MS	By MS/MS	By MS/MS	By MS/MS	20.8	18.1	14.7	16.4	122380000	39924000	37766000	17848000	26840000	28467000	33440000	20337000	25577000	6	3	3
SPAC3A11.12c|rpt5|I|19S	SPAC3A11.12c|rpt5|I|19S	4	4	4	>SPAC3A11.12c|rpt5|I|19S proteasome regulatory subunit Rpt5 (predicted)	1	4	4	4	2	4	3	2	2	4	3	2	2	4	3	2	14.6	14.6	14.6	48.835	438	438	0	15.191	By MS/MS	By MS/MS	By MS/MS	By matching	8.2	14.6	11.9	9.6	38361000	7538800	11154000	9146000	10522000	8995800	7024000	0	0	2	3	2
SPAC3A12.05c|taf2|I|TATA-binding	SPAC3A12.05c|taf2|I|TATA-binding	2	2	2	>SPAC3A12.05c|taf2|I|TATA-binding protein associated factor Taf2 (predicted)	1	2	2	2	1	0	0	1	1	0	0	1	1	0	0	1	2.5	2.5	2.5	133.91	1172	1172	0	11.576	By MS/MS	By matching	By matching	By MS/MS	1.2	0	0	1.3	0	0	0	0	0	0	0	0	0	1	0	0
SPAC3A12.18|zwf1|I|glucose-6-phosphate	SPAC3A12.18|zwf1|I|glucose-6-phosphate	8	8	8	>SPAC3A12.18|zwf1|I|glucose-6-phosphate 1-dehydrogenase (predicted)	1	8	8	8	7	5	7	5	7	5	7	5	7	5	7	5	18.8	18.8	18.8	57.204	500	500	0	38.391	By MS/MS	By MS/MS	By MS/MS	By MS/MS	16.4	10.4	16.8	12.4	161430000	52188000	30618000	51451000	27175000	32062000	36846000	34145000	36864000	7	3	5
SPAC3C7.04|SPAC3C7.04|I|transcription	SPAC3C7.04|SPAC3C7.04|I|transcription	2	2	2	>SPAC3C7.04|SPAC3C7.04|I|transcription factor (predicted)	1	2	2	2	1	1	1	0	1	1	1	0	1	1	1	0	2.7	2.7	2.7	87.957	783	783	0	5.427	By matching	By MS/MS	By MS/MS	By matching	1.3	1.3	1.4	0	18227000	1904600	3669400	12653000	0	0	3210700	0	0	0	1	0
SPAC3C7.05c|mug191|I|alpha-1,6-	SPAC3C7.05c|mug191|I|alpha-1,6-	1	1	1	>SPAC3C7.05c|mug191|I|alpha-1,6- mannanase (predicted)	1	1	1	1	1	0	0	0	1	0	0	0	1	0	0	0	2.5	2.5	2.5	49.78	442	442	0.0069018	2.2545	By MS/MS	By matching	By matching	By matching	2.5	0	0	0	0	0	0	0	0	0	0	0	0	1	0	0
SPAC3C7.08c|elf1|I|AAA	SPAC3C7.08c|elf1|I|AAA	31	31	31	>SPAC3C7.08c|elf1|I|AAA family ATPase Elf1	1	31	31	31	21	25	24	20	21	25	24	20	21	25	24	20	42.9	42.9	42.9	116.7	1057	1057	0	187.82	By MS/MS	By MS/MS	By MS/MS	By MS/MS	28	35	31.1	30.8	809840000	193500000	217700000	199290000	199360000	156590000	195950000	150190000	212860000	17	22	16
SPAC3C7.11c|cnx1|I|calnexin	SPAC3C7.11c|cnx1|I|calnexin	5	5	5	>SPAC3C7.11c|cnx1|I|calnexin Cnx1	1	5	5	5	3	3	5	3	3	3	5	3	3	3	5	3	12.5	12.5	12.5	63.465	560	560	0	26.422	By MS/MS	By MS/MS	By MS/MS	By MS/MS	6.8	6.8	12.5	6.8	101080000	24772000	25525000	30015000	20768000	24272000	24292000	14158000	25812000	3	2	5
SPAC3C7.14c|obr1|I|ubiquitinated	SPAC3C7.14c|obr1|I|ubiquitinated	3	3	3	>SPAC3C7.14c|obr1|I|ubiquitinated protein Uhp1	1	3	3	3	3	1	3	1	3	1	3	1	3	1	3	1	17.8	17.8	17.8	21.898	202	202	0	7.2419	By MS/MS	By MS/MS	By MS/MS	By MS/MS	17.8	8.4	17.8	8.4	42104000	16719000	9383000	10382000	5620200	13074000	0	9407800	0	2	1	2
SPAC3F10.03|grs1|I|mitochondrial	SPAC3F10.03|grs1|I|mitochondrial	7	7	7	>SPAC3F10.03|grs1|I|mitochondrial and cytoplasmic glycine-tRNA ligase Grs1	1	7	7	7	6	6	4	5	6	6	4	5	6	6	4	5	13.8	13.8	13.8	74.004	652	652	0	43.21	By MS/MS	By MS/MS	By MS/MS	By MS/MS	10.6	12.4	7.2	10.4	100420000	24066000	34422000	13508000	28428000	24731000	20863000	17626000	26499000	7	6	4
SPAC3F10.04|gsa1|I|glutathione	SPAC3F10.04|gsa1|I|glutathione	2	2	2	>SPAC3F10.04|gsa1|I|glutathione synthetase large and small subunit Gsa1	1	2	2	2	1	2	0	0	1	2	0	0	1	2	0	0	4.8	4.8	4.8	56.152	498	498	0	5.058	By MS/MS	By MS/MS	By matching	By matching	1.8	4.8	0	0	9075800	3007800	6068000	0	0	0	5309600	0	0	0	1	0
SPAC3F10.11c|abc2|I|glutathione	SPAC3F10.11c|abc2|I|glutathione	9	9	9	>SPAC3F10.11c|abc2|I|glutathione S-conjugate-exporting ATPase Abc2	1	9	9	9	6	5	6	5	6	5	6	5	6	5	6	5	8.8	8.8	8.8	166.94	1478	1478	0	33.799	By MS/MS	By MS/MS	By MS/MS	By MS/MS	6	4.9	6.2	4.6	62134000	14841000	20356000	7915100	19021000	11979000	15810000	11169000	16755000	5	4	6
SPAC3F10.13|ucp6|I|UBA	SPAC3F10.13|ucp6|I|UBA	6	6	6	>SPAC3F10.13|ucp6|I|UBA domain protein Ucp6	1	6	6	6	6	6	3	6	6	6	3	6	6	6	3	6	10.5	10.5	10.5	68.72	612	612	0	22.672	By MS/MS	By MS/MS	By MS/MS	By MS/MS	10.5	10.5	6.5	10.5	99514000	24936000	26652000	19985000	27940000	22043000	19712000	22105000	24661000	4	5	2
SPCC1322.11|rpl2302|III|60S;SPAC3G9.03|rpl2301|I|60S	SPCC1322.11|rpl2302|III|60S;SPAC3G9.03|rpl2301|I|60S	3;3	3;3	3;3	>SPCC1322.11|rpl2302|III|60S ribosomal protein L23;>SPAC3G9.03|rpl2301|I|60S ribosomal protein L23	2	3	3	3	2	2	2	2	2	2	2	2	2	2	2	2	20.9	20.9	20.9	14.882	139	139;139	0	20.404	By MS/MS	By matching	By MS/MS	By MS/MS	15.1	15.1	15.1	15.1	82721000	23443000	14084000	22367000	22828000	18310000	0	19682000	0	1	0	1
SPAC3G9.05|spa2|I|cell	SPAC3G9.05|spa2|I|cell	4	4	4	>SPAC3G9.05|spa2|I|cell polarity protein Spa2	1	4	4	4	4	0	3	1	4	0	3	1	4	0	3	1	7.9	7.9	7.9	73.872	659	659	0	11.828	By MS/MS	By matching	By MS/MS	By matching	7.9	0	5	1.7	16168000	10426000	0	3768600	1973300	8657300	0	0	0	4	0	2
SPAC3G9.06|frs2|I|cytoplasmic	SPAC3G9.06|frs2|I|cytoplasmic	6	6	6	>SPAC3G9.06|frs2|I|cytoplasmic phenylalanine-tRNA ligase alpha subunit Frs2 (predicted)	1	6	6	6	4	4	5	4	4	4	5	4	4	4	5	4	17.2	17.2	17.2	56.266	499	499	0	26.589	By MS/MS	By MS/MS	By MS/MS	By MS/MS	9.8	12	15	12.4	72492000	16718000	18313000	15337000	22124000	12496000	17133000	16030000	19075000	3	3	3
SPAC3G9.09c|tif211|I|translation	SPAC3G9.09c|tif211|I|translation	6	6	6	>SPAC3G9.09c|tif211|I|translation initiation factor eIF2 alpha subunit	1	6	6	6	5	4	5	2	5	4	5	2	5	4	5	2	21.2	21.2	21.2	34.525	306	306	0	20.483	By MS/MS	By MS/MS	By MS/MS	By MS/MS	21.2	17	16	10.8	177730000	27498000	14883000	123400000	11957000	42555000	26317000	45358000	35794000	6	2	4
SPAC3H1.05|ste24|I|CAAX	SPAC3H1.05|ste24|I|CAAX	14	14	14	>SPAC3H1.05|ste24|I|CAAX prenyl protease (predicted)	1	14	14	14	12	10	12	11	12	10	12	11	12	10	12	11	33.1	33.1	33.1	54.001	474	474	0	47.033	By MS/MS	By MS/MS	By MS/MS	By MS/MS	28.7	19.8	25.1	26.2	335580000	88576000	73546000	86914000	86541000	65292000	80371000	73059000	77713000	12	9	10
SPAC3H1.07|aru1|I|arginase	SPAC3H1.07|aru1|I|arginase	14	14	9	>SPAC3H1.07|aru1|I|arginase Aru1	1	14	14	9	9	10	9	11	9	10	9	11	5	6	6	8	51.4	51.4	39.9	35.703	323	323	0	65.931	By MS/MS	By MS/MS	By MS/MS	By MS/MS	32.8	36.2	33.4	41.8	751670000	148200000	250680000	170260000	182530000	115290000	192590000	136180000	214470000	9	11	10
SPAC3H1.09c|avt3|I|vacuolar	SPAC3H1.09c|avt3|I|vacuolar	3	3	3	>SPAC3H1.09c|avt3|I|vacuolar amino acid transmembrane transporter Avt3	1	3	3	3	3	3	3	3	3	3	3	3	3	3	3	3	6.1	6.1	6.1	73.06	656	656	0	17.079	By MS/MS	By MS/MS	By MS/MS	By MS/MS	6.1	6.1	6.1	6.1	69815000	16914000	22369000	15083000	15450000	15228000	18649000	13498000	14185000	2	2	3
SPBC18H10.13|rps1402|II|40S;SPAC3H5.05c|rps1401|I|40S	SPBC18H10.13|rps1402|II|40S;SPAC3H5.05c|rps1401|I|40S	4;4	4;4	4;4	>SPBC18H10.13|rps1402|II|40S ribosomal protein S14 (predicted);>SPAC3H5.05c|rps1401|I|40S ribosomal protein S14 (predicted)	2	4	4	4	2	1	4	1	2	1	4	1	2	1	4	1	38.1	38.1	38.1	14.699	139	139;139	0	15.097	By MS/MS	By MS/MS	By MS/MS	By MS/MS	13.7	7.2	38.1	7.2	58958000	9991100	2862400	43443000	2662200	23484000	0	20797000	0	2	1	4
SPAC3H5.07|rpl702|I|60S	SPAC3H5.07|rpl702|I|60S	3	2	2	>SPAC3H5.07|rpl702|I|60S ribosomal protein L7	1	3	2	2	2	2	2	1	1	2	1	1	1	2	1	1	13.6	9.6	9.6	28.449	250	250	0	9.0929	By MS/MS	By MS/MS	By MS/MS	By MS/MS	10	9.6	10	6	22743000	5670200	6838100	5531500	4703200	0	0	0	4703200	1	2	1
SPAC3H5.08c|SPAC3H5.08c|I|WD	SPAC3H5.08c|SPAC3H5.08c|I|WD	2	2	2	>SPAC3H5.08c|SPAC3H5.08c|I|WD repeat protein, human WDR44 family	1	2	2	2	1	2	1	1	1	2	1	1	1	2	1	1	2.3	2.3	2.3	103.69	933	933	0	3.7969	By MS/MS	By MS/MS	By matching	By MS/MS	1.1	2.3	1.1	1.2	15532000	3374400	4418400	5417600	2321900	0	3866100	0	0	0	1	0
SPBC11C11.09c|rpl502|II|60S;SPAC3H5.12c|rpl501|I|60S	SPBC11C11.09c|rpl502|II|60S;SPAC3H5.12c|rpl501|I|60S	8;8	8;8	8;8	>SPBC11C11.09c|rpl502|II|60S ribosomal protein L5;>SPAC3H5.12c|rpl501|I|60S ribosomal protein L5 (predicted)	2	8	8	8	8	7	5	7	8	7	5	7	8	7	5	7	48	48	48	33.485	294	294;294	0	99.222	By MS/MS	By MS/MS	By MS/MS	By MS/MS	48	41.8	29.9	41.8	364070000	89265000	109360000	68520000	96928000	80405000	78727000	75216000	89147000	8	10	3
SPAC3H8.02|csr102|I|sec14	SPAC3H8.02|csr102|I|sec14	3	3	3	>SPAC3H8.02|csr102|I|sec14 cytosolic factor family, glycerophospholipid-transfer protein Crs102 (predicted)	1	3	3	3	3	2	1	0	3	2	1	0	3	2	1	0	6.3	6.3	6.3	51.473	444	444	0	5.5544	By MS/MS	By MS/MS	By matching	By matching	6.3	4.3	2.3	0	7716200	3669200	1464100	2583000	0	3046600	0	0	0	3	1	0
SPAC3H8.10|spo20|I|sec14	SPAC3H8.10|spo20|I|sec14	3	3	3	>SPAC3H8.10|spo20|I|sec14 cytosolic factor family, glycerophospholipid-transfer protein Spo20/Sec14	1	3	3	3	1	1	2	2	1	1	2	2	1	1	2	2	15.4	15.4	15.4	32.746	286	286	0	11.122	By MS/MS	By MS/MS	By MS/MS	By MS/MS	3.1	5.2	8.4	12.2	26119000	4906100	4088800	9631700	7492100	0	0	7978300	0	0	1	1
SPAC458.02c|SPAC458.02c|I|mRNP	SPAC458.02c|SPAC458.02c|I|mRNP	5	5	5	>SPAC458.02c|SPAC458.02c|I|mRNP complex (predicted)	1	5	5	5	3	4	1	1	3	4	1	1	3	4	1	1	17.7	17.7	17.7	53.735	468	468	0	19.031	By MS/MS	By MS/MS	By MS/MS	By MS/MS	9	14.3	2.8	4.7	36776000	15257000	18488000	0	3031000	16140000	12706000	0	0	3	2	1
SPAC458.03|tel2|I|Tel2/Rad-5/Clk-2	SPAC458.03|tel2|I|Tel2/Rad-5/Clk-2	2	2	2	>SPAC458.03|tel2|I|Tel2/Rad-5/Clk-2 family protein Tel2	1	2	2	2	1	2	1	1	1	2	1	1	1	2	1	1	3.9	3.9	3.9	99.049	868	868	0	4.678	By MS/MS	By MS/MS	By MS/MS	By MS/MS	2.5	3.9	1.4	2.5	23152000	5040400	7628400	2912800	7569900	0	6675000	0	0	1	1	1
SPAC4A8.05c|myp2|I|myosin	SPAC4A8.05c|myp2|I|myosin	8	8	8	>SPAC4A8.05c|myp2|I|myosin II heavy chain Myo3	1	8	8	8	2	7	3	3	2	7	3	3	2	7	3	3	3.3	3.3	3.3	242.57	2104	2104	0	13.673	By MS/MS	By MS/MS	By MS/MS	By MS/MS	1	2.9	1.4	1.6	66618000	18873000	18381000	15924000	13441000	0	13718000	0	0	2	3	2
SPAC4A8.11c|fas2|I|fatty	SPAC4A8.11c|fas2|I|fatty	60	60	60	>SPAC4A8.11c|fas2|I|fatty acid synthase alpha subunit Fas2	1	60	60	60	44	51	49	47	44	51	49	47	44	51	49	47	45.6	45.6	45.6	202.17	1842	1842	0	323.31	By MS/MS	By MS/MS	By MS/MS	By MS/MS	34.4	39.9	36.4	37.8	2472000000	533590000	756350000	552620000	629450000	463120000	640070000	453290000	596350000	48	47	44
SPAC4A8.13c|pts1|I|20S	SPAC4A8.13c|pts1|I|20S	2	2	2	>SPAC4A8.13c|pts1|I|20S proteasome complex subunit beta 5	1	2	2	2	2	2	2	2	2	2	2	2	2	2	2	2	8.5	8.5	8.5	29.986	272	272	0	5.2927	By MS/MS	By MS/MS	By MS/MS	By MS/MS	8.5	8.5	8.5	8.5	19151000	3201100	4583500	6563200	4803300	0	3781000	5737000	4732400	1	2	1
SPAC4A8.16c|tif33|I|translation	SPAC4A8.16c|tif33|I|translation	17	17	17	>SPAC4A8.16c|tif33|I|translation initiation factor eIF3c	1	17	17	17	14	11	12	11	14	11	12	11	14	11	12	11	26.9	26.9	26.9	104.37	918	918	0	75.448	By MS/MS	By MS/MS	By MS/MS	By MS/MS	20.4	17	19.7	18.8	400960000	112240000	105460000	106510000	76759000	89487000	89646000	81312000	83051000	12	13	9
SPAC4D7.01c|sec71|I|Sec7	SPAC4D7.01c|sec71|I|Sec7	5	5	5	>SPAC4D7.01c|sec71|I|Sec7 domain protein, ARF GEF (predicted)	1	5	5	5	2	2	3	3	2	2	3	3	2	2	3	3	3.3	3.3	3.3	206.93	1811	1811	0	8.053	By MS/MS	By MS/MS	By MS/MS	By MS/MS	1.7	0.9	1.6	1.4	22718000	4145700	3239800	9439400	5892800	0	0	5711100	8000600	2	2	2
SPAC4D7.02c|pgc1|I|phosphatidylglycerol	SPAC4D7.02c|pgc1|I|phosphatidylglycerol	1	1	1	>SPAC4D7.02c|pgc1|I|phosphatidylglycerol phospholipase C Pgc1 (predicted)	1	1	1	1	1	0	0	0	1	0	0	0	1	0	0	0	2.9	2.9	2.9	35.585	311	311	0.0097671	2.1058	By MS/MS	By matching	By matching	By matching	2.9	0	0	0	0	0	0	0	0	0	0	0	0	1	0	0
SPAC4D7.05|sum1|I|translation	SPAC4D7.05|sum1|I|translation	6	6	6	>SPAC4D7.05|sum1|I|translation initiation factor eIF3i	1	6	6	6	5	4	5	4	5	4	5	4	5	4	5	4	20.7	20.7	20.7	36.811	328	328	0	25.848	By MS/MS	By MS/MS	By MS/MS	By MS/MS	17.4	13.7	17.1	13.7	84582000	25460000	18231000	20302000	20590000	18659000	18073000	17276000	20490000	6	3	5
SPAC4D7.08c|ade4|I|amidophosphoribosyltransferase	SPAC4D7.08c|ade4|I|amidophosphoribosyltransferase	15	15	15	>SPAC4D7.08c|ade4|I|amidophosphoribosyltransferase Ade4	1	15	15	15	9	13	9	12	9	13	9	12	9	13	9	12	37.7	37.7	37.7	59.831	533	533	0	93.889	By MS/MS	By MS/MS	By MS/MS	By MS/MS	19.9	30.4	23.5	29.6	398680000	112880000	86459000	113030000	86315000	80773000	82407000	69162000	116980000	4	10	5
SPAC4D7.09|tif223|I|translation	SPAC4D7.09|tif223|I|translation	3	3	3	>SPAC4D7.09|tif223|I|translation initiation factor eIF2B gamma subunit	1	3	3	3	3	3	2	2	3	3	2	2	3	3	2	2	9	9	9	50.461	458	458	0	9.7493	By MS/MS	By MS/MS	By MS/MS	By MS/MS	9	9	6.3	6.1	59778000	17007000	15414000	15631000	11727000	12202000	11299000	14442000	14339000	2	4	2
SPAC4D7.10c|spt20|I|SAGA	SPAC4D7.10c|spt20|I|SAGA	12	12	12	>SPAC4D7.10c|spt20|I|SAGA complex subunit Spt20	1	12	12	12	12	10	8	8	12	10	8	8	12	10	8	8	29	29	29	54.028	473	473	0	150.48	By MS/MS	By MS/MS	By MS/MS	By MS/MS	29	24.7	19	17.8	523280000	241870000	106410000	120420000	54577000	180180000	91690000	106950000	69445000	16	12	11
SPAC4F10.02|aap1|I|aspartyl	SPAC4F10.02|aap1|I|aspartyl	1	1	1	>SPAC4F10.02|aap1|I|aspartyl metalloaminopeptidase Aap1	1	1	1	1	1	0	1	1	1	0	1	1	1	0	1	1	2.8	2.8	2.8	51.74	467	467	0	3.4348	By MS/MS	By matching	By MS/MS	By MS/MS	2.8	0	2.8	2.8	7327600	1861300	0	2159500	3306800	0	0	0	3306800	1	0	1
SPAC4F10.09c|noc1|I|ribosome	SPAC4F10.09c|noc1|I|ribosome	11	11	11	>SPAC4F10.09c|noc1|I|ribosome biogenesis protein Noc1 (predicted)	1	11	11	11	8	9	7	6	8	9	7	6	8	9	7	6	15.1	15.1	15.1	97.992	860	860	0	161.19	By MS/MS	By MS/MS	By MS/MS	By MS/MS	11	12.7	9.4	8.3	108100000	36448000	33827000	23390000	14437000	20980000	27487000	18685000	26523000	6	5	4
SPAC4F10.10c|mnn9|I|mannosyltransferase	SPAC4F10.10c|mnn9|I|mannosyltransferase	7	7	7	>SPAC4F10.10c|mnn9|I|mannosyltransferase complex subunit, Anp family Mnn9 (predicted)	1	7	7	7	5	5	5	5	5	5	5	5	5	5	5	5	32.6	32.6	32.6	38.296	337	337	0	41.484	By MS/MS	By MS/MS	By MS/MS	By MS/MS	25.5	24.9	27.9	24.9	137110000	30127000	38056000	25088000	43843000	25306000	34690000	21299000	41644000	3	3	3
SPAC4F10.11|spn1|I|mitotic	SPAC4F10.11|spn1|I|mitotic	3	3	3	>SPAC4F10.11|spn1|I|mitotic septin Spn1	1	3	3	3	2	2	1	2	2	2	1	2	2	2	1	2	6.8	6.8	6.8	53.737	469	469	0	5.5689	By MS/MS	By MS/MS	By MS/MS	By MS/MS	3.8	4.9	1.9	4.9	26606000	4847500	8922900	3179500	9655800	0	0	0	9655800	1	1	1
SPAC4F10.13c|mpd2|I|GYF	SPAC4F10.13c|mpd2|I|GYF	1	1	1	>SPAC4F10.13c|mpd2|I|GYF domain protein	1	1	1	1	1	0	1	0	1	0	1	0	1	0	1	0	1.1	1.1	1.1	106.14	992	992	0.003882	2.3895	By MS/MS	By matching	By MS/MS	By matching	1.1	0	1.1	0	3026400	1444900	0	1581500	0	0	0	1310000	0	1	0	0
SPAC4F10.14c|btf3|I|nascent	SPAC4F10.14c|btf3|I|nascent	2	2	2	>SPAC4F10.14c|btf3|I|nascent polypeptide-associated complex beta subunit	1	2	2	2	2	2	2	2	2	2	2	2	2	2	2	2	26.5	26.5	26.5	16.202	151	151	0	7.7241	By MS/MS	By MS/MS	By MS/MS	By MS/MS	26.5	26.5	26.5	26.5	35290000	9974400	8615400	10298000	6401700	6911200	7645200	8593300	7603000	2	4	2
SPAC4F10.18|nup37|I|WD	SPAC4F10.18|nup37|I|WD	1	1	1	>SPAC4F10.18|nup37|I|WD repeat protein, nucleoporin Nup37	1	1	1	1	1	1	1	1	1	1	1	1	1	1	1	1	3.3	3.3	3.3	42.776	391	391	0	3.2186	By MS/MS	By MS/MS	By MS/MS	By MS/MS	3.3	3.3	3.3	3.3	6109300	0	3051800	0	3057500	0	0	0	3057500	1	1	1
SPAC4F10.20|grx1|I|glutaredoxin	SPAC4F10.20|grx1|I|glutaredoxin	1	1	1	>SPAC4F10.20|grx1|I|glutaredoxin Grx1	1	1	1	1	1	1	0	1	1	1	0	1	1	1	0	1	9.9	9.9	9.9	11.261	101	101	0	7.9195	By MS/MS	By MS/MS	By matching	By MS/MS	9.9	9.9	0	9.9	5099100	3260900	0	0	1838200	0	0	0	1838200	1	1	0
SPAC4F8.07c|hxk2|I|hexokinase	SPAC4F8.07c|hxk2|I|hexokinase	16	16	16	>SPAC4F8.07c|hxk2|I|hexokinase 2	1	16	16	16	14	12	16	13	14	12	16	13	14	12	16	13	40.9	40.9	40.9	50.92	455	455	0	77.558	By MS/MS	By MS/MS	By MS/MS	By MS/MS	37.6	29.9	40.9	33.2	595920000	153480000	141030000	171830000	129590000	133220000	121210000	117510000	141220000	14	11	15
SPAC4F8.12c|spp42|I|U5	SPAC4F8.12c|spp42|I|U5	6	6	6	>SPAC4F8.12c|spp42|I|U5 snRNP complex subunit Spp42	1	6	6	6	2	5	4	5	2	5	4	5	2	5	4	5	2.4	2.4	2.4	274.55	2363	2363	0	14.292	By MS/MS	By MS/MS	By MS/MS	By MS/MS	0.8	1.9	1.6	2	28555000	4158100	9055800	5791600	9549300	0	8221700	0	9251500	1	3	2
SPAC4F8.14c|hcs1|I|3-hydroxy-3-methylglutaryl-CoA	SPAC4F8.14c|hcs1|I|3-hydroxy-3-methylglutaryl-CoA	5	5	5	>SPAC4F8.14c|hcs1|I|3-hydroxy-3-methylglutaryl-CoA synthase	1	5	5	5	3	5	4	3	3	5	4	3	3	5	4	3	20.6	20.6	20.6	49.238	447	447	0	36.055	By MS/MS	By MS/MS	By MS/MS	By MS/MS	9.6	20.6	15.4	13	102030000	19007000	32562000	28419000	22040000	21642000	21815000	19529000	26869000	3	6	4
SPAC4G8.02c|sss1|I|translocon	SPAC4G8.02c|sss1|I|translocon	1	1	1	>SPAC4G8.02c|sss1|I|translocon gamma subunit Sss1 (predicted)	1	1	1	1	1	1	1	0	1	1	1	0	1	1	1	0	17.1	17.1	17.1	7.7912	70	70	0	6.1516	By MS/MS	By MS/MS	By MS/MS	By matching	17.1	17.1	17.1	0	8069200	2622800	0	5446300	0	0	0	4511400	0	1	1	1
SPAC4G9.03|adk1|I|adenylate	SPAC4G9.03|adk1|I|adenylate	2	2	2	>SPAC4G9.03|adk1|I|adenylate kinase Adk1	1	2	2	2	0	1	1	1	0	1	1	1	0	1	1	1	9.5	9.5	9.5	24.375	220	220	0	3.8105	By matching	By MS/MS	By MS/MS	By MS/MS	0	5	4.5	5	5951300	0	3271000	0	2680300	0	0	0	2680300	0	1	1
SPAC4G9.08c|rpc2|I|DNA-directed	SPAC4G9.08c|rpc2|I|DNA-directed	3	3	3	>SPAC4G9.08c|rpc2|I|DNA-directed RNA polymerase III complex subunit Rpc2	1	3	3	3	2	1	2	2	2	1	2	2	2	1	2	2	4.2	4.2	4.2	130.24	1165	1165	0	8.3038	By MS/MS	By MS/MS	By MS/MS	By MS/MS	2.1	1.3	2.1	3.3	18270000	1501800	3055000	5913700	7799400	0	0	0	7799400	1	1	1
SPAC4G9.09c|arg11|I|N-acetyl-gamma-glutamyl-phosphate	SPAC4G9.09c|arg11|I|N-acetyl-gamma-glutamyl-phosphate	13	13	13	>SPAC4G9.09c|arg11|I|N-acetyl-gamma-glutamyl-phosphate reductase/acetylglutamate kinase	1	13	13	13	11	10	10	8	11	10	10	8	11	10	10	8	18.8	18.8	18.8	97.704	885	885	0	69.139	By MS/MS	By MS/MS	By MS/MS	By MS/MS	15.6	15.8	15.8	12.7	555900000	137140000	159530000	121570000	137650000	112920000	132000000	91470000	140630000	13	8	9
SPAC4G9.11c|cmb1|I|cytosine-mismatch	SPAC4G9.11c|cmb1|I|cytosine-mismatch	1	1	1	>SPAC4G9.11c|cmb1|I|cytosine-mismatch binding protein 1	1	1	1	1	1	0	1	1	1	0	1	1	1	0	1	1	4.9	4.9	4.9	26.304	223	223	0	3.2805	By MS/MS	By matching	By MS/MS	By MS/MS	4.9	0	4.9	4.9	7706000	3161200	0	2471500	2073300	0	0	0	2073300	1	0	1
SPAC4G9.15|ifa38|I|ketoreductase	SPAC4G9.15|ifa38|I|ketoreductase	2	2	2	>SPAC4G9.15|ifa38|I|ketoreductase involved in fatty acid elongation (predicted)	1	2	2	2	2	2	1	2	2	2	1	2	2	2	1	2	5.3	5.3	5.3	37.307	341	341	0	9.2082	By MS/MS	By MS/MS	By MS/MS	By MS/MS	5.3	5.3	2.9	5.3	31458000	8221200	7667600	5395000	10175000	6202800	7182900	0	10324000	1	1	1
SPAC4G9.16c|rpl901|I|60S	SPAC4G9.16c|rpl901|I|60S	4	4	1	>SPAC4G9.16c|rpl901|I|60S ribosomal protein L9	1	4	4	1	3	3	4	3	3	3	4	3	1	1	1	0	23.7	23.7	6.3	21.513	190	190	0	21.295	By MS/MS	By MS/MS	By MS/MS	By MS/MS	23.2	12.1	23.7	17.4	170430000	42925000	41160000	53344000	33002000	36315000	34891000	41807000	35832000	3	3	2
SPAC4H3.10c|pyk1|I|pyruvate	SPAC4H3.10c|pyk1|I|pyruvate	34	34	34	>SPAC4H3.10c|pyk1|I|pyruvate kinase	1	34	34	34	34	32	31	28	34	32	31	28	34	32	31	28	73.3	73.3	73.3	55.514	509	509	0	323.31	By MS/MS	By MS/MS	By MS/MS	By MS/MS	73.3	71.3	70.3	70.7	5847000000	1395700000	1522400000	1557300000	1371600000	993290000	1196400000	1092700000	1220800000	55	50	56
SPAC4H3.14c|rng8|I|contractile	SPAC4H3.14c|rng8|I|contractile	12	12	12	>SPAC4H3.14c|rng8|I|contractile ring myosin V regulator Rng8	1	12	12	12	12	12	10	7	12	12	10	7	12	12	10	7	44.6	44.6	44.6	39.799	345	345	0	74.004	By MS/MS	By MS/MS	By MS/MS	By MS/MS	44.6	44.6	36.8	25.8	360530000	123680000	78307000	106680000	51865000	84957000	66578000	87780000	66698000	11	8	6
SPCP31B10.07|eft202|III|translation;SPAC513.01c|eft201|I|translation	SPCP31B10.07|eft202|III|translation;SPAC513.01c|eft201|I|translation	43;43	43;43	42;42	>SPCP31B10.07|eft202|III|translation elongation factor 2 (EF-2) Eft2,B;>SPAC513.01c|eft201|I|translation elongation factor 2 (EF-2) Eft2,A	2	43	43	42	42	38	40	33	42	38	40	33	41	37	39	32	56.7	56.7	55.5	93.23	842	842;842	0	323.31	By MS/MS	By MS/MS	By MS/MS	By MS/MS	55.7	51.4	53.2	44.5	3238200000	943220000	727440000	913950000	653570000	671620000	596150000	686470000	731590000	51	39	57
SPAC513.05|ams1|I|alpha-mannosidase	SPAC513.05|ams1|I|alpha-mannosidase	7	7	7	>SPAC513.05|ams1|I|alpha-mannosidase Ams1 (predicted)	1	7	7	7	4	5	6	3	4	5	6	3	4	5	6	3	7.8	7.8	7.8	122.44	1077	1077	0	19.736	By MS/MS	By MS/MS	By MS/MS	By MS/MS	4.5	5.4	6.9	3.6	42980000	10187000	12795000	14107000	5891700	10129000	10408000	8078800	8615500	2	5	5
SPAC513.07|SPAC513.07|I|flavonol	SPAC513.07|SPAC513.07|I|flavonol	1	1	1	>SPAC513.07|SPAC513.07|I|flavonol reductase/cinnamoyl-CoA reductase family	1	1	1	1	0	0	0	1	0	0	0	1	0	0	0	1	3.9	3.9	3.9	37.461	336	336	0.00081037	2.879	By matching	By matching	By matching	By MS/MS	0	0	0	3.9	0	0	0	0	0	0	0	0	0	0	0	0
SPAC521.03|SPAC521.03|I|short	SPAC521.03|SPAC521.03|I|short	7	7	7	>SPAC521.03|SPAC521.03|I|short chain dehydrogenase (predicted)	1	7	7	7	6	2	6	4	6	2	6	4	6	2	6	4	32.4	32.4	32.4	28.148	259	259	0	29.654	By MS/MS	By MS/MS	By MS/MS	By MS/MS	24.7	11.2	25.9	20.8	70301000	26691000	4558300	31518000	7533500	18547000	12994000	18953000	9297900	4	1	3
SPAC521.04c|sst1|I|calcium	SPAC521.04c|sst1|I|calcium	2	2	2	>SPAC521.04c|sst1|I|calcium permease (predicted)	1	2	2	2	2	1	2	1	2	1	2	1	2	1	2	1	3	3	3	98.857	881	881	0	6.4161	By MS/MS	By MS/MS	By MS/MS	By MS/MS	3	0.8	3	0.8	11246000	4753700	0	5044000	1447900	3931300	0	4194000	0	1	1	2
SPAC56E4.03|SPAC56E4.03|I|aromatic	SPAC56E4.03|SPAC56E4.03|I|aromatic	9	9	9	>SPAC56E4.03|SPAC56E4.03|I|aromatic aminotransferase (predicted)	1	9	9	9	6	8	5	6	6	8	5	6	6	8	5	6	29.7	29.7	29.7	53.166	474	474	0	51.368	By MS/MS	By MS/MS	By MS/MS	By MS/MS	20.5	25.1	17.7	19.4	244620000	60739000	86301000	47360000	50224000	56229000	50435000	67008000	41730000	6	6	2
SPAC56E4.04c|cut6|I|acetyl-CoA/biotin	SPAC56E4.04c|cut6|I|acetyl-CoA/biotin	112	112	112	>SPAC56E4.04c|cut6|I|acetyl-CoA/biotin carboxylase	1	112	112	112	104	99	94	87	104	99	94	87	104	99	94	87	63.5	63.5	63.5	256.84	2280	2280	0	323.31	By MS/MS	By MS/MS	By MS/MS	By MS/MS	60.5	57.7	53.9	53.4	10924000000	2445700000	3979200000	1933800000	2565300000	1749900000	3114000000	1416900000	2588000000	143	141	124
SPAC56F8.02|SPAC56F8.02|I|AMP	SPAC56F8.02|SPAC56F8.02|I|AMP	5	5	5	>SPAC56F8.02|SPAC56F8.02|I|AMP binding enzyme (predicted)	1	5	5	5	1	4	2	4	1	4	2	4	1	4	2	4	3.3	3.3	3.3	170.69	1517	1517	0	10.549	By MS/MS	By MS/MS	By MS/MS	By MS/MS	0.6	2.6	1.4	2.4	15713000	1793900	7470700	2464800	3983500	0	4400100	0	6120400	1	3	1
SPAC56F8.03|tif52|I|translation	SPAC56F8.03|tif52|I|translation	4	4	4	>SPAC56F8.03|tif52|I|translation initiation factor eIF5B Tif52 (predicted)	1	4	4	4	3	3	3	4	3	3	3	4	3	3	3	4	3.7	3.7	3.7	119.93	1079	1079	0	10.216	By MS/MS	By MS/MS	By MS/MS	By MS/MS	2.9	2.9	2.9	3.7	34541000	7860600	6864200	9035200	10781000	6825400	0	0	10482000	1	1	1
SPAC56F8.05c|mug64|I|BAR	SPAC56F8.05c|mug64|I|BAR	3	3	3	>SPAC56F8.05c|mug64|I|BAR domain protein (predicted)	1	3	3	3	3	2	0	1	3	2	0	1	3	2	0	1	10.8	10.8	10.8	31.747	286	286	0	7.9618	By MS/MS	By MS/MS	By matching	By MS/MS	10.8	8	0	3.1	14556000	7183800	5318300	0	2054300	0	4653500	0	0	2	0	0
SPAC56F8.10|met9|I|methylenetetrahydrofolate	SPAC56F8.10|met9|I|methylenetetrahydrofolate	1	1	1	>SPAC56F8.10|met9|I|methylenetetrahydrofolate reductase Met9	1	1	1	1	1	1	1	1	1	1	1	1	1	1	1	1	1.8	1.8	1.8	69.011	603	603	0	3.3892	By MS/MS	By MS/MS	By MS/MS	By matching	1.8	1.8	1.8	1.8	13625000	4291800	2358700	5953300	1020800	0	0	0	1020800	1	1	1
SPAC57A10.05c|pof1|I|F-box/WD	SPAC57A10.05c|pof1|I|F-box/WD	3	3	3	>SPAC57A10.05c|pof1|I|F-box/WD repeat protein protein Pof1	1	3	3	3	1	3	2	2	1	3	2	2	1	3	2	2	6.1	6.1	6.1	67.11	605	605	0	8.5812	By MS/MS	By MS/MS	By MS/MS	By MS/MS	1.3	6.1	3.1	4.3	21048000	2408100	9194400	2913900	6531300	0	7470000	0	7106500	1	3	2
SPAC57A10.12c|ura3|I|dihydroorotate	SPAC57A10.12c|ura3|I|dihydroorotate	3	3	3	>SPAC57A10.12c|ura3|I|dihydroorotate dehydrogenase Ura3	1	3	3	3	1	1	2	2	1	1	2	2	1	1	2	2	10.6	10.6	10.6	48.295	443	443	0	4.4784	By matching	By matching	By MS/MS	By MS/MS	1.8	1.8	7.4	5	13092000	1950200	1591900	6996800	2552500	0	0	5795700	0	0	0	0
SPAC57A7.04c|pabp|I|mRNA	SPAC57A7.04c|pabp|I|mRNA	10	10	10	>SPAC57A7.04c|pabp|I|mRNA export shuttling protein	1	10	10	10	7	9	9	7	7	9	9	7	7	9	9	7	15.6	15.6	15.6	71.512	653	653	0	34.769	By MS/MS	By MS/MS	By MS/MS	By MS/MS	11.9	14.1	13.3	11.8	183160000	39763000	51560000	51493000	40345000	34452000	42470000	39599000	44609000	4	5	7
SPAC57A7.08|pzh1|I|serine/threonine	SPAC57A7.08|pzh1|I|serine/threonine	9	9	9	>SPAC57A7.08|pzh1|I|serine/threonine protein phosphatase Pzh1	1	9	9	9	7	6	7	7	7	6	7	7	7	6	7	7	23.7	23.7	23.7	57.131	515	515	0	49.404	By MS/MS	By MS/MS	By MS/MS	By MS/MS	19.4	15.3	19.4	18.4	173480000	45067000	39496000	42063000	46854000	33818000	35867000	29665000	47075000	7	4	3
SPAC57A7.10c|sec21|I|coatomer	SPAC57A7.10c|sec21|I|coatomer	26	26	26	>SPAC57A7.10c|sec21|I|coatomer gamma subunit Sec21 (predicted)	1	26	26	26	20	21	17	21	20	21	17	21	20	21	17	21	36.4	36.4	36.4	100.93	905	905	0	103.2	By MS/MS	By MS/MS	By MS/MS	By MS/MS	26.7	29.5	20.7	27.1	408440000	98932000	107830000	98329000	103350000	74476000	95307000	86549000	104960000	14	21	13
SPAC57A7.11|mip1|I|WD	SPAC57A7.11|mip1|I|WD	1	1	1	>SPAC57A7.11|mip1|I|WD repeat protein, Raptor homolog Mip1	1	1	1	1	1	1	1	1	1	1	1	1	1	1	1	1	1	1	1	148.53	1313	1313	0	3.2284	By matching	By matching	By MS/MS	By MS/MS	1	1	1	1	12626000	1952800	5116900	3597200	1958600	0	0	0	1958600	0	0	1
SPAC57A7.12|ssz1|I|heat	SPAC57A7.12|ssz1|I|heat	8	8	8	>SPAC57A7.12|ssz1|I|heat shock protein Ssz1 (predicted)	1	8	8	8	4	7	4	4	4	7	4	4	4	7	4	4	23.3	23.3	23.3	61.285	566	566	0	31.638	By MS/MS	By MS/MS	By MS/MS	By MS/MS	12	21.4	12	10.2	80513000	18823000	28289000	15652000	17749000	15925000	22139000	11648000	21384000	4	8	3
SPAC589.06c|SPAC589.06c|I|pho88	SPAC589.06c|SPAC589.06c|I|pho88	2	2	2	>SPAC589.06c|SPAC589.06c|I|pho88 family protein (predicted)	1	2	2	2	2	1	2	1	2	1	2	1	2	1	2	1	14.9	14.9	14.9	21.742	202	202	0	7.5379	By MS/MS	By MS/MS	By MS/MS	By MS/MS	14.9	6.9	14.9	6.9	36212000	13806000	5604000	13132000	3670100	0	0	10878000	0	2	1	1
SPAC589.12|cwh43|I|glycosylceramide	SPAC589.12|cwh43|I|glycosylceramide	5	5	5	>SPAC589.12|cwh43|I|glycosylceramide biosynthesis protein Cwh43 (predicted)	1	5	5	5	3	4	3	4	3	4	3	4	3	4	3	4	7.8	7.8	7.8	110.03	971	971	0	20.088	By MS/MS	By MS/MS	By MS/MS	By MS/MS	5.1	6.9	6.1	7	58827000	11602000	19139000	14579000	13507000	9363700	16474000	11741000	14384000	1	4	2
SPAC5D6.09c|mug86|I|acetate	SPAC5D6.09c|mug86|I|acetate	1	1	1	>SPAC5D6.09c|mug86|I|acetate transmembrane transporter (predicted)	1	1	1	1	1	0	0	0	1	0	0	0	1	0	0	0	4.9	4.9	4.9	33.919	304	304	0	3.3239	By MS/MS	By matching	By matching	By matching	4.9	0	0	0	3168700	3168700	0	0	0	2631100	0	0	0	1	0	0
SPAC5H10.03|SPAC5H10.03|I|phosphoglycerate	SPAC5H10.03|SPAC5H10.03|I|phosphoglycerate	3	3	3	>SPAC5H10.03|SPAC5H10.03|I|phosphoglycerate mutase family	1	3	3	3	3	3	2	1	3	3	2	1	3	3	2	1	18.3	18.3	18.3	24.716	219	219	0	9.1444	By MS/MS	By MS/MS	By MS/MS	By MS/MS	18.3	18.3	11.9	5.9	46218000	10429000	17101000	13626000	5061100	8695600	14904000	11310000	0	2	4	2
SPAC5H10.06c|adh4|I|alcohol	SPAC5H10.06c|adh4|I|alcohol	5	5	5	>SPAC5H10.06c|adh4|I|alcohol dehydrogenase Adh4	1	5	5	5	2	3	3	5	2	3	3	5	2	3	3	5	16.9	16.9	16.9	40.674	379	379	0	15.374	By MS/MS	By MS/MS	By MS/MS	By MS/MS	6.1	11.1	11.1	16.9	58101000	2930800	17577000	14739000	22854000	0	17265000	13822000	19356000	1	0	1
SPAC5H10.10|SPAC5H10.10|I|NADPH	SPAC5H10.10|SPAC5H10.10|I|NADPH	2	2	2	>SPAC5H10.10|SPAC5H10.10|I|NADPH dehydrogenase (predicted)	1	2	2	2	0	1	0	2	0	1	0	2	0	1	0	2	6.1	6.1	6.1	44.983	392	392	0	4.772	By matching	By MS/MS	By matching	By MS/MS	0	3.8	0	6.1	7901300	0	2160500	0	5740700	0	0	0	5740700	0	1	0
SPAC607.03c|snu13|I|U3	SPAC607.03c|snu13|I|U3	1	1	1	>SPAC607.03c|snu13|I|U3 snoRNP-associated protein Snu13	1	1	1	1	1	0	0	1	1	0	0	1	1	0	0	1	19.2	19.2	19.2	13.535	125	125	0.00082237	3.0416	By MS/MS	By matching	By matching	By MS/MS	19.2	0	0	19.2	0	0	0	0	0	0	0	0	0	1	0	0
SPAC607.05|rpn9|I|19S	SPAC607.05|rpn9|I|19S	2	2	2	>SPAC607.05|rpn9|I|19S proteasome regulatory subunit Rpn9	1	2	2	2	2	2	2	1	2	2	2	1	2	2	2	1	7.9	7.9	7.9	43.457	381	381	0	6.6164	By MS/MS	By MS/MS	By MS/MS	By MS/MS	7.9	7.9	7.9	5	26235000	7135900	6925700	7179300	4994100	6229100	5528200	6174800	0	2	2	1
SPAC607.06c|SPAC607.06c|I|metallopeptidase	SPAC607.06c|SPAC607.06c|I|metallopeptidase	2	2	2	>SPAC607.06c|SPAC607.06c|I|metallopeptidase (predicted)	1	2	2	2	2	1	1	1	2	1	1	1	2	1	1	1	2.8	2.8	2.8	68.57	612	612	0.00080645	2.8159	By MS/MS	By MS/MS	By MS/MS	By matching	2.8	1.1	1.6	1.1	4656600	3300400	593220	0	762950	2740400	0	0	0	1	1	1
SPAC630.03|arp3|I|Arp2/3	SPAC630.03|arp3|I|Arp2/3	6	6	6	>SPAC630.03|arp3|I|Arp2/3 protein complex, actin-like protein subunit Arp3	1	6	6	6	5	5	3	3	5	5	3	3	5	5	3	3	21.8	21.8	21.8	47.373	427	427	0	30.147	By MS/MS	By MS/MS	By MS/MS	By MS/MS	19	19	8.2	11.9	66224000	14350000	21171000	14169000	16534000	13466000	12640000	14632000	17973000	4	3	1
SPAC630.08c|erg25|I|C-4	SPAC630.08c|erg25|I|C-4	7	7	7	>SPAC630.08c|erg25|I|C-4 methylsterol oxidase Erg25 (predicted)	1	7	7	7	7	6	7	4	7	6	7	4	7	6	7	4	21.7	21.7	21.7	35.802	300	300	0	27.294	By MS/MS	By MS/MS	By MS/MS	By MS/MS	21.7	18.7	21.7	16	372410000	104100000	88417000	102550000	77334000	76279000	79271000	82810000	87730000	4	6	5
SPAC630.09c|mug58|I|GLYK	SPAC630.09c|mug58|I|GLYK	2	2	2	>SPAC630.09c|mug58|I|GLYK family kinase of unknown specificity (predicted)	1	2	2	2	1	1	1	0	1	1	1	0	1	1	1	0	11.9	11.9	11.9	31.809	277	277	0	3.4467	By MS/MS	By matching	By MS/MS	By matching	4.7	4.7	7.2	0	9503200	3805100	3537800	2160300	0	0	3095600	0	0	0	0	0
SPAC630.11|vps55|I|vacuolar	SPAC630.11|vps55|I|vacuolar	1	1	1	>SPAC630.11|vps55|I|vacuolar sorting protein Vps55 (predicted)	1	1	1	1	0	1	0	1	0	1	0	1	0	1	0	1	15.6	15.6	15.6	14.096	128	128	0	5.7816	By matching	By MS/MS	By matching	By MS/MS	0	15.6	0	15.6	9886200	0	4613100	0	5273200	0	0	0	5273200	0	1	0
SPAC630.12|SPAC630.12|I|mannose-ethanolamine	SPAC630.12|SPAC630.12|I|mannose-ethanolamine	2	2	2	>SPAC630.12|SPAC630.12|I|mannose-ethanolamine phosphate phosphodiesterase (predicted)	1	2	2	2	1	2	0	1	1	2	0	1	1	2	0	1	4.7	4.7	4.7	49.26	422	422	0	5.4146	By matching	By MS/MS	By matching	By MS/MS	2.4	4.7	0	2.4	4886400	681340	3328100	0	876990	0	2912100	0	0	0	1	0
SPAC630.13c|tsc2|I|tuberin	SPAC630.13c|tsc2|I|tuberin	4	4	4	>SPAC630.13c|tsc2|I|tuberin	1	4	4	4	2	3	3	3	2	3	3	3	2	3	3	3	2.9	2.9	2.9	154.81	1339	1339	0	7.1317	By MS/MS	By matching	By MS/MS	By MS/MS	1.4	2.2	2.2	2.2	18261000	3443700	3718500	6702300	4396400	0	3675400	5060700	4465700	0	0	1
SPAC630.14c|tup12|I|transcriptional	SPAC630.14c|tup12|I|transcriptional	1	1	1	>SPAC630.14c|tup12|I|transcriptional corepressor Tup12	1	1	1	1	0	1	1	1	0	1	1	1	0	1	1	1	2.7	2.7	2.7	65.56	598	598	0	3.1818	By matching	By MS/MS	By matching	By MS/MS	0	2.7	2.7	2.7	9206100	0	2784500	3256400	3165200	0	0	0	3165200	0	1	0
SPAC637.03|SPAC637.03|I|conserved	SPAC637.03|SPAC637.03|I|conserved	1	1	1	>SPAC637.03|SPAC637.03|I|conserved fungal protein	1	1	1	1	0	1	1	0	0	1	1	0	0	1	1	0	7.4	7.4	7.4	30.6	269	269	0.0076394	2.2301	By matching	By MS/MS	By MS/MS	By matching	0	7.4	7.4	0	9600300	0	4595500	5004700	0	0	0	4145600	0	0	1	1
SPAC637.04|ypp1|I|cargo-transport	SPAC637.04|ypp1|I|cargo-transport	7	7	7	>SPAC637.04|ypp1|I|cargo-transport protein Ypp1 (predicted)	1	7	7	7	3	6	4	6	3	6	4	6	3	6	4	6	7.5	7.5	7.5	98.306	862	862	0	16.871	By MS/MS	By MS/MS	By MS/MS	By MS/MS	3.6	6.4	5	6.4	50447000	6095300	14271000	10230000	19850000	0	11468000	10760000	18584000	2	3	2
SPAC637.05c|vma2|I|V-type	SPAC637.05c|vma2|I|V-type	4	4	4	>SPAC637.05c|vma2|I|V-type ATPase V1 subunit B	1	4	4	4	3	2	3	2	3	2	3	2	3	2	3	2	13.5	13.5	13.5	55.841	503	503	0	13.806	By MS/MS	By MS/MS	By MS/MS	By MS/MS	10.3	8.2	10.3	7.2	42314000	8686300	17191000	10860000	5575900	7316300	14939000	0	0	2	3	2
SPAC637.07|moe1|I|translation	SPAC637.07|moe1|I|translation	2	2	2	>SPAC637.07|moe1|I|translation initiation factor eIF3d Moe1	1	2	2	2	1	2	2	1	1	2	2	1	1	2	2	1	5.1	5.1	5.1	62.636	567	567	0	5.8352	By MS/MS	By MS/MS	By matching	By MS/MS	2.6	5.1	5.1	2.6	27859000	4462200	9726800	9160700	4509300	0	0	7588100	0	1	1	0
SPAC644.13c|SPAC644.13c|I|Rab	SPAC644.13c|SPAC644.13c|I|Rab	2	2	2	>SPAC644.13c|SPAC644.13c|I|Rab GTPase binding (predicted)	1	2	2	2	1	2	1	2	1	2	1	2	1	2	1	2	7.1	7.1	7.1	25.309	225	225	0	5.5952	By MS/MS	By MS/MS	By MS/MS	By MS/MS	3.6	7.1	3.6	7.1	29527000	3832600	9992100	5416200	10286000	0	8740600	0	10289000	1	2	1
SPBC18H10.14|rps1601|II|40S;SPAC664.04c|rps1602|I|40S	SPBC18H10.14|rps1601|II|40S;SPAC664.04c|rps1602|I|40S	6;6	6;6	6;6	>SPBC18H10.14|rps1601|II|40S ribosomal protein S16 (predicted);>SPAC664.04c|rps1602|I|40S ribosomal protein S16 (predicted)	2	6	6	6	5	4	6	4	5	4	6	4	5	4	6	4	50.7	50.7	50.7	15.395	140	140;140	0	47.178	By MS/MS	By MS/MS	By MS/MS	By MS/MS	45.7	40	50.7	40	288230000	82329000	74711000	79190000	52000000	65264000	62605000	63398000	60062000	5	4	7
SPAC664.05|rpl13|I|60S	SPAC664.05|rpl13|I|60S	6	6	6	>SPAC664.05|rpl13|I|60S ribosomal protein L13 (predicted)	1	6	6	6	5	6	5	5	5	6	5	5	5	6	5	5	46.2	46.2	46.2	23.529	208	208	0	41.824	By MS/MS	By MS/MS	By MS/MS	By MS/MS	41.8	46.2	41.8	41.8	116910000	31080000	33958000	27625000	24246000	25285000	28808000	23527000	25029000	2	7	4
SPAC664.11|ssc1|I|mitochondrial	SPAC664.11|ssc1|I|mitochondrial	19	19	19	>SPAC664.11|ssc1|I|mitochondrial heat shock protein Hsp70	1	19	19	19	16	17	16	15	16	17	16	15	16	17	16	15	38	38	38	72.976	674	674	0	97.861	By MS/MS	By MS/MS	By MS/MS	By MS/MS	30.4	34.6	30.7	30.3	945200000	286900000	246610000	222590000	189100000	231270000	211620000	188450000	196150000	16	14	12
SPAC688.11|end4|I|Huntingtin-interacting	SPAC688.11|end4|I|Huntingtin-interacting	10	10	10	>SPAC688.11|end4|I|Huntingtin-interacting protein homolog	1	10	10	10	6	6	8	3	6	6	8	3	6	6	8	3	13.3	13.3	13.3	124.37	1102	1102	0	35.07	By MS/MS	By MS/MS	By MS/MS	By MS/MS	8.7	8.2	11.1	5.4	91646000	26353000	21137000	28587000	15568000	20579000	20841000	18031000	20174000	7	4	1
SPAC688.12c|SPAC688.12c|I|Schizosaccharomyces	SPAC688.12c|SPAC688.12c|I|Schizosaccharomyces	1	1	1	>SPAC688.12c|SPAC688.12c|I|Schizosaccharomyces specific protein	1	1	1	1	0	1	0	0	0	1	0	0	0	1	0	0	6.6	6.6	6.6	19.353	167	167	0.00081169	2.8963	By matching	By MS/MS	By matching	By matching	0	6.6	0	0	0	0	0	0	0	0	0	0	0	0	1	0
SPAC694.02|SPAC694.02|I|DEAD/DEAH	SPAC694.02|SPAC694.02|I|DEAD/DEAH	47	47	47	>SPAC694.02|SPAC694.02|I|DEAD/DEAH box helicase	1	47	47	47	35	41	39	39	35	41	39	39	35	41	39	39	33.1	33.1	33.1	195.06	1717	1717	0	269.31	By MS/MS	By MS/MS	By MS/MS	By MS/MS	23.6	30.2	27.1	28.6	1611200000	318190000	530720000	366610000	395660000	274580000	438480000	302630000	410940000	36	47	36
SPAC694.04c|SPAC694.04c|I|conserved	SPAC694.04c|SPAC694.04c|I|conserved	2	2	2	>SPAC694.04c|SPAC694.04c|I|conserved eukaryotic protein	1	2	2	2	0	2	0	2	0	2	0	2	0	2	0	2	7.4	7.4	7.4	36.672	324	324	0	4.0067	By matching	By MS/MS	By matching	By MS/MS	0	7.4	0	7.4	7563700	0	4551300	0	3012300	0	0	0	3012300	0	1	0
SPAC6B12.04c|SPAC6B12.04c|I|2-aminoadipate	SPAC6B12.04c|SPAC6B12.04c|I|2-aminoadipate	3	3	3	>SPAC6B12.04c|SPAC6B12.04c|I|2-aminoadipate transaminase (predicted)	1	3	3	3	2	2	2	2	2	2	2	2	2	2	2	2	7.4	7.4	7.4	47.569	421	421	0	7.8142	By MS/MS	By MS/MS	By MS/MS	By MS/MS	4.3	4.3	4.3	5.5	15855000	4953200	5351300	3976500	1574100	4170200	4524300	3394600	0	2	2	2
SPAC6B12.06c|rrg9|I|mitochondrial	SPAC6B12.06c|rrg9|I|mitochondrial	1	1	1	>SPAC6B12.06c|rrg9|I|mitochondrial genome maintenance protein Rrg9 (predicted)	1	1	1	1	1	0	1	0	1	0	1	0	1	0	1	0	10.3	10.3	10.3	13.827	117	117	0	3.0999	By matching	By matching	By MS/MS	By matching	10.3	0	10.3	0	119220000	73415000	0	45809000	0	0	0	37945000	0	0	0	1
SPAC6B12.07c|SPAC6B12.07c|I|ubiquitin-protein	SPAC6B12.07c|SPAC6B12.07c|I|ubiquitin-protein	2	2	2	>SPAC6B12.07c|SPAC6B12.07c|I|ubiquitin-protein ligase E3 (predicted)	1	2	2	2	2	2	2	2	2	2	2	2	2	2	2	2	4	4	4	53.403	470	470	0	8.3542	By MS/MS	By MS/MS	By MS/MS	By MS/MS	4	4	4	4	28889000	6232500	5834700	9365100	7456400	4920100	4983400	8048500	7542300	1	1	1
SPAC6B12.10c|spp1|I|DNA	SPAC6B12.10c|spp1|I|DNA	1	1	1	>SPAC6B12.10c|spp1|I|DNA primase catalytic subunit Spp1	1	1	1	1	0	0	0	1	0	0	0	1	0	0	0	1	2.6	2.6	2.6	52.009	454	454	0.0023753	2.5813	By matching	By matching	By matching	By MS/MS	0	0	0	2.6	1046200	0	0	0	1046200	0	0	0	1046200	0	0	0
SPAC6B12.12|tom70|I|mitochondrial	SPAC6B12.12|tom70|I|mitochondrial	4	4	4	>SPAC6B12.12|tom70|I|mitochondrial TOM complex subunit Tom70 (predicted)	1	4	4	4	3	1	3	1	3	1	3	1	3	1	3	1	6.2	6.2	6.2	69.516	625	625	0	8.5181	By MS/MS	By MS/MS	By MS/MS	By matching	5.1	2.4	4.8	1.1	13823000	3196900	0	6794700	3831400	0	0	5628300	0	2	1	2
SPAC6B12.14c|SPAC6B12.14c|I|conserved	SPAC6B12.14c|SPAC6B12.14c|I|conserved	3	3	3	>SPAC6B12.14c|SPAC6B12.14c|I|conserved fungal protein	1	3	3	3	2	0	2	2	2	0	2	2	2	0	2	2	44.2	44.2	44.2	17.397	154	154	0	50.109	By MS/MS	By matching	By MS/MS	By MS/MS	25.3	0	25.3	31.2	37856000	9880900	0	9549200	18426000	7815700	0	8298600	0	1	0	2
SPAC6B12.15|cpc2|I|RACK1	SPAC6B12.15|cpc2|I|RACK1	21	21	21	>SPAC6B12.15|cpc2|I|RACK1 ortholog Cpc2	1	21	21	21	19	21	19	20	19	21	19	20	19	21	19	20	83.1	83.1	83.1	34.851	314	314	0	323.31	By MS/MS	By MS/MS	By MS/MS	By MS/MS	73.6	83.1	80.9	83.1	4596800000	933980000	1629600000	917120000	1116100000	756470000	1347400000	729630000	1174200000	23	29	18
SPAC6C3.04|cit1|I|citrate	SPAC6C3.04|cit1|I|citrate	10	10	10	>SPAC6C3.04|cit1|I|citrate synthase Cit1	1	10	10	10	7	8	7	4	7	8	7	4	7	8	7	4	27.1	27.1	27.1	54.16	483	483	0	35.989	By MS/MS	By MS/MS	By MS/MS	By MS/MS	17.8	21.3	18.2	11.8	171300000	41259000	41232000	61985000	26822000	34033000	37716000	36776000	39979000	5	7	7
SPAC6C3.06c|SPAC6C3.06c|I|P-type	SPAC6C3.06c|SPAC6C3.06c|I|P-type	1	1	1	>SPAC6C3.06c|SPAC6C3.06c|I|P-type ATPase, calcium transporting (predicted)	1	1	1	1	1	0	1	1	1	0	1	1	1	0	1	1	0.8	0.8	0.8	116.59	1033	1033	0	5.2939	By MS/MS	By matching	By MS/MS	By MS/MS	0.8	0	0.8	0.8	2473200	1152300	0	1320900	0	0	0	1094200	0	1	0	1
SPAC6F12.05c|tnr3|I|thiamine	SPAC6F12.05c|tnr3|I|thiamine	6	6	6	>SPAC6F12.05c|tnr3|I|thiamine diphosphokinase Tnr3/ Nudix hydrolase fusion protein	1	6	6	6	3	5	2	4	3	5	2	4	3	5	2	4	18.3	18.3	18.3	64.235	569	569	0	31.823	By MS/MS	By MS/MS	By MS/MS	By MS/MS	8.1	16.2	4.9	11.2	62533000	8153900	30092000	8738400	15548000	8631600	15244000	13428000	18585000	3	6	2
SPAC6F12.08c|exo84|I|exocyst	SPAC6F12.08c|exo84|I|exocyst	1	1	1	>SPAC6F12.08c|exo84|I|exocyst complex subunit Exo84 (predicted)	1	1	1	1	0	1	0	0	0	1	0	0	0	1	0	0	2.1	2.1	2.1	68.592	584	584	0	4.2329	By matching	By MS/MS	By matching	By matching	0	2.1	0	0	0	0	0	0	0	0	0	0	0	0	1	0
SPAC6F12.10c|ade3|I|phosphoribosylformylglycinamidine	SPAC6F12.10c|ade3|I|phosphoribosylformylglycinamidine	20	20	20	>SPAC6F12.10c|ade3|I|phosphoribosylformylglycinamidine synthase Ade3 (predicted)	1	20	20	20	14	16	16	15	14	16	16	15	14	16	16	15	20.9	20.9	20.9	144.86	1323	1323	0	96.652	By MS/MS	By MS/MS	By MS/MS	By MS/MS	13.8	16.9	16.4	16.2	401690000	66812000	127980000	85085000	121810000	59805000	115930000	69766000	111850000	8	17	11
SPAC6F12.12|par2|I|protein	SPAC6F12.12|par2|I|protein	3	3	3	>SPAC6F12.12|par2|I|protein phosphatase PP2A regulatory subunit B-56 Par2	1	3	3	3	3	1	2	2	3	1	2	2	3	1	2	2	4.1	4.1	4.1	72.464	627	627	0	6.5758	By MS/MS	By MS/MS	By MS/MS	By MS/MS	4.1	2.1	3.3	3.3	19426000	4163600	2434400	9095000	3733300	0	0	0	3733300	1	1	1
SPAC6F12.13c|fps1|I|geranyltranstransferase	SPAC6F12.13c|fps1|I|geranyltranstransferase	7	7	7	>SPAC6F12.13c|fps1|I|geranyltranstransferase Fps1	1	7	7	7	5	6	6	7	5	6	6	7	5	6	6	7	23.1	23.1	23.1	39.516	347	347	0	28.971	By MS/MS	By MS/MS	By MS/MS	By MS/MS	13.8	20.7	20.7	23.1	154470000	26401000	42248000	42092000	43729000	30832000	36101000	33002000	37549000	4	7	5
SPAC6F12.14|cut23|I|anaphase-promoting	SPAC6F12.14|cut23|I|anaphase-promoting	2	2	2	>SPAC6F12.14|cut23|I|anaphase-promoting complex, TPR lobe subcomplex subunit Apc8	1	2	2	2	2	2	1	2	2	2	1	2	2	2	1	2	4.8	4.8	4.8	65.854	565	565	0	6.1695	By MS/MS	By MS/MS	By matching	By MS/MS	4.8	4.8	2.5	4.8	24588000	6740900	6317000	4511900	7017700	0	0	0	7017700	0	1	0
SPAC6F12.15c|cut9|I|anaphase-promoting	SPAC6F12.15c|cut9|I|anaphase-promoting	4	4	4	>SPAC6F12.15c|cut9|I|anaphase-promoting complex, TPR lobe subcomplex subunit Cut9/Apc6	1	4	4	4	2	3	2	3	2	3	2	3	2	3	2	3	7.7	7.7	7.7	75.888	671	671	0	9.5129	By MS/MS	By MS/MS	By MS/MS	By MS/MS	3.7	6	4	6	41111000	9080800	9620900	8937900	13471000	9046200	8147000	0	12237000	2	2	0
SPAC6F12.16c|mtr4|I|ATP-dependent;SPAC17H9.02|mtl1|I|TRAMP	SPAC6F12.16c|mtr4|I|ATP-dependent;SPAC17H9.02|mtl1|I|TRAMP	2;1	2;1	2;1	>SPAC6F12.16c|mtr4|I|ATP-dependent RNA helicase, TRAMP complex subunit Mtr4;>SPAC17H9.02|mtl1|I|TRAMP complex ATP-dependent RNA helicase (predicted)	2	2	2	2	0	0	0	2	0	0	0	2	0	0	0	2	2.6	2.6	2.6	126.19	1117	1117;1030	0.0023641	2.5402	By matching	By matching	By matching	By MS/MS	0	0	0	2.6	2908900	0	0	0	2908900	0	0	0	2908900	0	0	0
SPAC6F6.03c|nog2|I|ribosome	SPAC6F6.03c|nog2|I|ribosome	2	2	2	>SPAC6F6.03c|nog2|I|ribosome export GTPase Nog2 (predicted)	1	2	2	2	2	0	0	1	2	0	0	1	2	0	0	1	4.5	4.5	4.5	59.913	537	537	0	6.8016	By MS/MS	By matching	By matching	By MS/MS	4.5	0	0	2.6	2642800	2642800	0	0	0	2194400	0	0	0	2	0	0
SPAC6F6.07c|rps13|I|40S	SPAC6F6.07c|rps13|I|40S	7	7	7	>SPAC6F6.07c|rps13|I|40S ribosomal protein S13	1	7	7	7	7	6	7	6	7	6	7	6	7	6	7	6	47	47	47	16.953	151	151	0	26.37	By MS/MS	By MS/MS	By MS/MS	By MS/MS	47	39.7	47	39.7	293780000	60944000	82185000	103730000	46924000	61724000	67690000	75776000	44005000	5	5	5
SPAC6G10.02c|tea3|I|cell	SPAC6G10.02c|tea3|I|cell	32	32	32	>SPAC6G10.02c|tea3|I|cell end marker Tea3	1	32	32	32	25	24	28	22	25	24	28	22	25	24	28	22	33.5	33.5	33.5	127.75	1125	1125	0	323.31	By MS/MS	By MS/MS	By MS/MS	By MS/MS	27.9	27.3	31.1	23.3	1029300000	346810000	212980000	295620000	173940000	229900000	201220000	220030000	239090000	32	30	29
SPAC6G10.03c|cld1|I|mitochondrial	SPAC6G10.03c|cld1|I|mitochondrial	4	4	4	>SPAC6G10.03c|cld1|I|mitochondrial cardiolipin-specific phospholipase Cld1 (predicted)	1	4	4	4	1	3	3	2	1	3	3	2	1	3	3	2	11	11	11	48.72	428	428	0	14.53	By MS/MS	By MS/MS	By MS/MS	By MS/MS	2.3	7.2	8.4	4.7	38155000	2705700	8468800	16300000	10681000	0	8137100	12021000	11435000	2	3	3
SPAC6G10.05c|trs120|I|TRAPP	SPAC6G10.05c|trs120|I|TRAPP	5	5	5	>SPAC6G10.05c|trs120|I|TRAPP complex subunit Trs120 (predicted)	1	5	5	5	4	2	3	2	4	2	3	2	4	2	3	2	5	5	5	137.76	1210	1210	0	10.336	By MS/MS	By matching	By MS/MS	By matching	4.2	2.2	3.3	2.4	30430000	11225000	5038700	7088300	7077700	6496200	6737400	6367600	0	2	0	3
SPAC6G10.08|idp1|I|isocitrate	SPAC6G10.08|idp1|I|isocitrate	9	9	9	>SPAC6G10.08|idp1|I|isocitrate dehydrogenase Idp1 (predicted)	1	9	9	9	9	7	7	3	9	7	7	3	9	7	7	3	22.1	22.1	22.1	49.478	439	439	0	23.484	By MS/MS	By MS/MS	By MS/MS	By MS/MS	22.1	17.3	17.3	7.5	88712000	30365000	26168000	20239000	11940000	19494000	22853000	19548000	14920000	5	6	5
SPAC6G10.09|SPAC6G10.09|I|alpha	SPAC6G10.09|SPAC6G10.09|I|alpha	4	4	4	>SPAC6G10.09|SPAC6G10.09|I|alpha glucosidase I Gls1 (predicted)	1	4	4	4	3	2	3	4	3	2	3	4	3	2	3	4	6.2	6.2	6.2	92.888	808	808	0	11.148	By MS/MS	By MS/MS	By MS/MS	By MS/MS	4.7	3.7	4.7	6.2	4715100	0	0	0	4715100	0	0	0	4715100	3	2	3
SPAC6G10.10c|SPAC6G10.10c|I|human	SPAC6G10.10c|SPAC6G10.10c|I|human	2	2	2	>SPAC6G10.10c|SPAC6G10.10c|I|human hmmtag2 homolog	1	2	2	2	1	2	1	0	1	2	1	0	1	2	1	0	16.5	16.5	16.5	22.398	194	194	0	7.7474	By MS/MS	By MS/MS	By MS/MS	By matching	10.3	16.5	6.2	0	26428000	3748100	15699000	6980100	0	0	13737000	0	0	1	1	1
SPAC6G9.06c|pcp1|I|pericentrin	SPAC6G9.06c|pcp1|I|pericentrin	1	1	1	>SPAC6G9.06c|pcp1|I|pericentrin Pcp1	1	1	1	1	1	1	1	0	1	1	1	0	1	1	1	0	0.8	0.8	0.8	140.76	1208	1208	0.003888	2.403	By MS/MS	By matching	By MS/MS	By matching	0.8	0.8	0.8	0	6515400	2568300	2062900	1884200	0	0	0	1560700	0	1	0	0
SPAC6G9.07c|arc4|I|ARP2/3	SPAC6G9.07c|arc4|I|ARP2/3	1	1	1	>SPAC6G9.07c|arc4|I|ARP2/3 actin-organizing complex subunit Arc4	1	1	1	1	0	1	0	1	0	1	0	1	0	1	0	1	4.8	4.8	4.8	19.614	168	168	0	3.2462	By matching	By MS/MS	By matching	By MS/MS	0	4.8	0	4.8	3293600	0	1913100	0	1380600	0	0	0	1380600	0	1	0
SPCC330.14c|rpl2402|III|60S;SPAC6G9.09c|rpl2401|I|60S	SPCC330.14c|rpl2402|III|60S;SPAC6G9.09c|rpl2401|I|60S	1;1	1;1	1;1	>SPCC330.14c|rpl2402|III|60S ribosomal protein L24 (predicted);>SPAC6G9.09c|rpl2401|I|60S ribosomal protein L24 (predicted)	2	1	1	1	1	1	1	1	1	1	1	1	1	1	1	1	7.4	7.4	7.4	16.912	149	149;149	0	3.7445	By MS/MS	By MS/MS	By MS/MS	By MS/MS	7.4	7.4	7.4	7.4	48662000	12570000	12771000	12477000	10844000	0	0	0	10844000	1	1	1
SPAC732.01|vma11|I|V-type	SPAC732.01|vma11|I|V-type	1	1	1	>SPAC732.01|vma11|I|V-type ATPase V0 proteolipid subunit (predicted)	1	1	1	1	1	1	0	1	1	1	0	1	1	1	0	1	9.3	9.3	9.3	16.785	162	162	0	3.5988	By MS/MS	By MS/MS	By matching	By MS/MS	9.3	9.3	0	9.3	20448000	5963800	9617200	0	4867100	0	0	0	4867100	1	1	0
SPAC767.01c|vps1|I|dynamin;SPBC12C2.08|dnm1|II|mitochondrial	SPAC767.01c|vps1|I|dynamin	39;2	39;2	39;2	>SPAC767.01c|vps1|I|dynamin family protein Vps1	2	39	39	39	31	30	34	31	31	30	34	31	31	30	34	31	64.5	64.5	64.5	75.79	678	678;781	0	323.31	By MS/MS	By MS/MS	By MS/MS	By MS/MS	53.4	55.2	59.4	54.6	3972600000	952470000	1141300000	976350000	902440000	774920000	992870000	750890000	850070000	33	35	32
SPAC7D4.04|atg11|I|autophagy	SPAC7D4.04|atg11|I|autophagy	2	2	2	>SPAC7D4.04|atg11|I|autophagy protein Atg11	1	2	2	2	2	2	1	1	2	2	1	1	2	2	1	1	2.3	2.3	2.3	106.77	926	926	0.00081103	2.8905	By matching	By MS/MS	By matching	By matching	2.3	2.3	1.3	1.3	15038000	4672300	4428900	2575900	3361100	0	3875400	0	0	0	0	0
SPAC7D4.06c|alg3|I|dolichol-P-Man	SPAC7D4.06c|alg3|I|dolichol-P-Man	1	1	1	>SPAC7D4.06c|alg3|I|dolichol-P-Man dependent alpha(1-3) mannosyltransferase Alg3 (predicted)	1	1	1	1	1	0	0	0	1	0	0	0	1	0	0	0	3.7	3.7	3.7	46.991	406	406	0	4.0195	By MS/MS	By matching	By matching	By matching	3.7	0	0	0	7206500	7206500	0	0	0	5983800	0	0	0	0	0	0
SPAC7D4.07c|trx1|I|cytosolic	SPAC7D4.07c|trx1|I|cytosolic	2	2	2	>SPAC7D4.07c|trx1|I|cytosolic thioredoxin Trx1	1	2	2	2	1	1	2	1	1	1	2	1	1	1	2	1	33	33	33	11.297	103	103	0	10.693	By MS/MS	By MS/MS	By MS/MS	By MS/MS	24.3	24.3	33	24.3	23518000	5519200	0	4829800	13169000	0	0	0	13169000	1	1	1
SPAC7D4.10|vma13|I|V-type	SPAC7D4.10|vma13|I|V-type	4	4	4	>SPAC7D4.10|vma13|I|V-type ATPase V1 subunit H (predicted)	1	4	4	4	2	3	2	3	2	3	2	3	2	3	2	3	9.8	9.8	9.8	51.436	450	450	0	9.3149	By MS/MS	By MS/MS	By MS/MS	By MS/MS	4.9	7.6	4.2	7.6	34499000	4651600	12141000	7022100	10685000	0	10213000	7374200	9537700	1	3	1
SPAC806.02c|SPAC806.02c|I|Par	SPAC806.02c|SPAC806.02c|I|Par	3	3	3	>SPAC806.02c|SPAC806.02c|I|Par A family ATPase/WD repeat iron cluster assembly fusion protein (predicted)	1	3	3	3	3	3	1	3	3	3	1	3	3	3	1	3	7.9	7.9	7.9	67.68	608	608	0	11.907	By MS/MS	By MS/MS	By MS/MS	By MS/MS	7.9	7.9	3.1	7.9	36327000	10795000	10912000	3294200	11325000	8062700	9715300	0	12059000	1	3	1
SPAC806.04c|SPAC806.04c|I|protein-glutamate	SPAC806.04c|SPAC806.04c|I|protein-glutamate	6	6	6	>SPAC806.04c|SPAC806.04c|I|protein-glutamate O-methyltransferase (predicted)	1	6	6	6	4	5	3	3	4	5	3	3	4	5	3	3	17.1	17.1	17.1	49.894	438	438	0	26.037	By MS/MS	By MS/MS	By MS/MS	By MS/MS	9.8	14.2	8.2	8.2	62412000	11391000	29003000	11649000	10369000	10948000	18387000	15151000	0	2	4	2
SPAC821.03c|slf1|I|cell	SPAC821.03c|slf1|I|cell	1	1	1	>SPAC821.03c|slf1|I|cell cortex node protein Slf1	1	1	1	1	0	0	1	0	0	0	1	0	0	0	1	0	2.9	2.9	2.9	53.991	485	485	0	5.5706	By matching	By matching	By MS/MS	By matching	0	0	2.9	0	3568500	0	0	3568500	0	0	0	2955900	0	0	0	0
SPAC821.05|tif38|I|translation	SPAC821.05|tif38|I|translation	4	4	4	>SPAC821.05|tif38|I|translation initiation factor eIF3h (p40)	1	4	4	4	3	4	4	3	3	4	4	3	3	4	4	3	17.1	17.1	17.1	39.78	357	357	0	31.791	By MS/MS	By MS/MS	By MS/MS	By MS/MS	11.8	17.1	17.1	13.2	125950000	28448000	31463000	40049000	25988000	28852000	21980000	31316000	27106000	4	3	2
SPAC821.11|pro1|I|gamma-glutamyl	SPAC821.11|pro1|I|gamma-glutamyl	6	6	6	>SPAC821.11|pro1|I|gamma-glutamyl phosphate reductase Pro1 (predicted)	1	6	6	6	2	4	2	4	2	4	2	4	2	4	2	4	21.5	21.5	21.5	48.706	451	451	0	30.893	By MS/MS	By MS/MS	By MS/MS	By MS/MS	4.7	13.7	4.7	16.4	53668000	7128800	16067000	7463300	23009000	0	14139000	0	22928000	1	2	1
SPAC823.03|ppk15|I|serine/threonine	SPAC823.03|ppk15|I|serine/threonine	6	6	6	>SPAC823.03|ppk15|I|serine/threonine protein kinase Ppk15 (predicted)	1	6	6	6	5	4	5	5	5	4	5	5	5	4	5	5	17.8	17.8	17.8	61.49	534	534	0	36.671	By MS/MS	By MS/MS	By MS/MS	By MS/MS	15.7	12.4	14.8	15.7	119680000	37907000	26212000	26046000	29516000	28397000	25949000	20764000	30391000	4	5	5
SPAC823.11|sgp1|I|sphingosine-1-phosphate	SPAC823.11|sgp1|I|sphingosine-1-phosphate	2	2	2	>SPAC823.11|sgp1|I|sphingosine-1-phosphate phosphatase	1	2	2	2	0	2	0	1	0	2	0	1	0	2	0	1	5.8	5.8	5.8	46.846	411	411	0	6.7957	By matching	By MS/MS	By matching	By MS/MS	0	5.8	0	1.9	4925000	0	4925000	0	0	0	4309400	0	0	0	2	0
SPAC823.12|vps11|I|HOPs/CORVET	SPAC823.12|vps11|I|HOPs/CORVET	2	2	2	>SPAC823.12|vps11|I|HOPs/CORVET complex biquitin protein ligase E3 subunit Vps11 (predicted)	1	2	2	2	0	1	1	2	0	1	1	2	0	1	1	2	1.7	1.7	1.7	102.52	906	906	0	4.461	By matching	By MS/MS	By matching	By MS/MS	0	0.9	0.9	1.7	3260100	0	1662000	1598000	0	0	0	1323700	0	0	1	0
SPAC824.07|glo2|I|glyoxalase	SPAC824.07|glo2|I|glyoxalase	4	4	4	>SPAC824.07|glo2|I|glyoxalase II	1	4	4	4	4	3	3	2	4	3	3	2	4	3	3	2	21.1	21.1	21.1	28.483	256	256	0	17.552	By MS/MS	By MS/MS	By MS/MS	By MS/MS	21.1	16.4	16.4	12.1	89465000	19248000	24258000	25110000	20849000	0	0	0	20849000	3	2	2
SPAC824.08|gda1|I|guanosine-diphosphatase	SPAC824.08|gda1|I|guanosine-diphosphatase	2	2	2	>SPAC824.08|gda1|I|guanosine-diphosphatase Gda1	1	2	2	2	1	1	2	0	1	1	2	0	1	1	2	0	4.1	4.1	4.1	61.588	556	556	0.001609	2.8031	By MS/MS	By matching	By MS/MS	By matching	2.3	1.8	4.1	0	12149000	4151500	2069500	5927700	0	0	0	4910100	0	0	0	1
SPAC890.02c|alp7|I|centrosomal	SPAC890.02c|alp7|I|centrosomal	18	18	18	>SPAC890.02c|alp7|I|centrosomal transforming acidic coiled-coil (TACC) protein ortholog Alp7	1	18	18	18	17	10	15	10	17	10	15	10	17	10	15	10	57	57	57	53.175	474	474	0	189.69	By MS/MS	By MS/MS	By MS/MS	By MS/MS	49.4	27.6	50	32.5	536640000	207810000	77280000	174710000	76843000	141670000	72992000	135490000	89935000	21	8	17
SPAC890.06|nup155|I|nucleoporin	SPAC890.06|nup155|I|nucleoporin	6	6	6	>SPAC890.06|nup155|I|nucleoporin Nup155	1	6	6	6	5	4	3	3	5	4	3	3	5	4	3	3	6.2	6.2	6.2	147.63	1315	1315	0	18.255	By MS/MS	By MS/MS	By MS/MS	By MS/MS	5.7	3.9	1.9	3	33620000	12448000	10742000	2361400	8068700	8828600	9144100	0	9831300	4	3	2
SPAC890.07c|rmt1|I|type	SPAC890.07c|rmt1|I|type	4	4	4	>SPAC890.07c|rmt1|I|type I protein arginine N-methyltransferase Rmt1	1	4	4	4	4	4	2	2	4	4	2	2	4	4	2	2	12.6	12.6	12.6	39.018	340	340	0	10.642	By MS/MS	By MS/MS	By MS/MS	By MS/MS	12.6	12.6	7.4	8.2	41324000	9757300	16527000	5477700	9562200	7431200	10561000	0	14133000	2	2	1
SPAC890.08|rpl31|I|60S	SPAC890.08|rpl31|I|60S	3	3	3	>SPAC890.08|rpl31|I|60S ribosomal protein L31 (predicted)	1	3	3	3	3	1	1	2	3	1	1	2	3	1	1	2	25.7	25.7	25.7	13.261	113	113	0	23.728	By MS/MS	By MS/MS	By MS/MS	By MS/MS	25.7	18.6	18.6	18.6	41729000	8908200	13125000	8789100	10907000	0	0	0	10907000	3	1	1
SPAC8C9.14|prr1|I|transcription	SPAC8C9.14|prr1|I|transcription	31	31	31	>SPAC8C9.14|prr1|I|transcription factor Prr1	1	31	31	31	29	31	28	29	29	31	28	29	29	31	28	29	67.5	67.5	67.5	60.045	539	539	0	323.31	By MS/MS	By MS/MS	By MS/MS	By MS/MS	67.5	67.5	61.4	67.5	7356500000	2293000000	1983200000	1710400000	1369900000	1596100000	1486900000	1370600000	1321300000	43	47	35
SPAC8C9.15c|tif225|I|translation	SPAC8C9.15c|tif225|I|translation	3	3	3	>SPAC8C9.15c|tif225|I|translation initiation factor eIF2B epsilon subunit	1	3	3	3	3	3	2	3	3	3	2	3	3	3	2	3	5.6	5.6	5.6	76.325	678	678	0	9.953	By MS/MS	By MS/MS	By MS/MS	By MS/MS	5.6	5.6	3.5	5.6	32062000	6766600	8651400	7826000	8818000	4984500	7564600	8517100	7423000	3	2	1
SPAC8E11.01c|SPAC8E11.01c|I|beta-fructofuranosidase	SPAC8E11.01c|SPAC8E11.01c|I|beta-fructofuranosidase	1	1	1	>SPAC8E11.01c|SPAC8E11.01c|I|beta-fructofuranosidase (predicted)	1	1	1	1	0	1	0	1	0	1	0	1	0	1	0	1	2.4	2.4	2.4	58.053	508	508	0.0068913	2.2437	By matching	By matching	By matching	By MS/MS	0	2.4	0	2.4	4661500	0	2358700	0	2302800	0	0	0	2302800	0	0	0
SPAC8E11.02c|rad24|I|14-3-3	SPAC8E11.02c|rad24|I|14-3-3	7	5	5	>SPAC8E11.02c|rad24|I|14-3-3 protein Rad24	1	7	5	5	6	6	6	5	4	4	4	3	4	4	4	3	34.1	27.4	27.4	30.082	270	270	0	64.639	By MS/MS	By MS/MS	By MS/MS	By MS/MS	30	28.9	30	24.4	287200000	82723000	63632000	80152000	60691000	71814000	49718000	68990000	59607000	5	5	6
SPAC8E11.10|SPAC8E11.10|I|sorbose	SPAC8E11.10|SPAC8E11.10|I|sorbose	3	3	3	>SPAC8E11.10|SPAC8E11.10|I|sorbose reductase (predicted)	1	3	3	3	3	3	3	1	3	3	3	1	3	3	3	1	16.9	16.9	16.9	27.437	255	255	0	33.296	By MS/MS	By MS/MS	By MS/MS	By matching	16.9	16.9	16.9	4.3	167520000	49304000	59572000	38634000	20009000	37195000	55099000	32773000	0	1	3	1
SPAC8F11.08c|SPAC8F11.08c|I|esterase/lipase	SPAC8F11.08c|SPAC8F11.08c|I|esterase/lipase	3	3	3	>SPAC8F11.08c|SPAC8F11.08c|I|esterase/lipase (predicted)	1	3	3	3	3	3	2	1	3	3	2	1	3	3	2	1	8.5	8.5	8.5	41.754	376	376	0	6.4655	By MS/MS	By MS/MS	By MS/MS	By MS/MS	8.5	8.5	5.3	2.7	24988000	9171400	9624600	4422600	1769900	0	8421600	0	0	0	0	1
SPAC8F11.10c|pvg1|I|pyruvyltransferase	SPAC8F11.10c|pvg1|I|pyruvyltransferase	5	5	5	>SPAC8F11.10c|pvg1|I|pyruvyltransferase Pvg1	1	5	5	5	1	5	1	4	1	5	1	4	1	5	1	4	19.2	19.2	19.2	44.871	401	401	0	23.062	By MS/MS	By MS/MS	By MS/MS	By MS/MS	5.2	19.2	5.2	16.2	76659000	8767000	34217000	11244000	22431000	0	28360000	0	24011000	1	4	1
SPAC9.02c|SPAC9.02c|I|polyamine	SPAC9.02c|SPAC9.02c|I|polyamine	1	1	1	>SPAC9.02c|SPAC9.02c|I|polyamine N-acetyltransferase (predicted)	1	1	1	1	1	1	1	1	1	1	1	1	1	1	1	1	15.8	15.8	15.8	18.791	165	165	0	12.951	By MS/MS	By MS/MS	By MS/MS	By MS/MS	15.8	15.8	15.8	15.8	29191000	7516500	8708100	7117700	5848900	0	0	0	5848900	1	2	1
SPAC9.03c|brr2|I|U5	SPAC9.03c|brr2|I|U5	69	69	69	>SPAC9.03c|brr2|I|U5 snRNP complex subunit Brr2	1	69	69	69	62	56	57	50	62	56	57	50	62	56	57	50	40.2	40.2	40.2	248.81	2176	2176	0	323.31	By MS/MS	By MS/MS	By MS/MS	By MS/MS	35.3	33.4	31.5	29	2245500000	630820000	553820000	554050000	506800000	478090000	491310000	439710000	539560000	59	55	46
SPAC9.07c|SPAC9.07c|I|GTPase	SPAC9.07c|SPAC9.07c|I|GTPase	5	5	5	>SPAC9.07c|SPAC9.07c|I|GTPase Rbg1 (predicted)	1	5	5	5	3	2	4	3	3	2	4	3	3	2	4	3	20.2	20.2	20.2	40.375	366	366	0	17.343	By MS/MS	By MS/MS	By MS/MS	By MS/MS	11.7	8.5	16.9	13.1	39190000	7700900	8003300	13455000	10031000	5162700	8780300	9926900	10703000	3	1	3
SPAC9.09|met26|I|homocysteine	SPAC9.09|met26|I|homocysteine	51	51	51	>SPAC9.09|met26|I|homocysteine methyltransferase Met26	1	51	51	51	44	39	46	36	44	39	46	36	44	39	46	36	72	72	72	85.339	764	764	0	323.31	By MS/MS	By MS/MS	By MS/MS	By MS/MS	61.4	58.2	68.2	55	6056500000	2087400000	1040500000	2023600000	904990000	1555900000	1005600000	1452700000	1051900000	58	38	55
SPAC9.10|thi9|I|thiamine	SPAC9.10|thi9|I|thiamine	2	2	2	>SPAC9.10|thi9|I|thiamine transmembrane transporter Thi9	1	2	2	2	2	1	2	1	2	1	2	1	2	1	2	1	5.1	5.1	5.1	65.069	591	591	0	6.7853	By MS/MS	By MS/MS	By MS/MS	By matching	5.1	2.5	5.1	2.5	52033000	20278000	3614700	23613000	4527000	16963000	0	19434000	0	3	1	2
SPAC922.03|SPAC922.03|I|deaminase	SPAC922.03|SPAC922.03|I|deaminase	1	1	1	>SPAC922.03|SPAC922.03|I|deaminase (predicted)	1	1	1	1	0	0	0	1	0	0	0	1	0	0	0	1	3	3	3	36.687	338	338	0.0024	2.6766	By matching	By matching	By matching	By MS/MS	0	0	0	3	1776900	0	0	0	1776900	0	0	0	1776900	0	0	0
SPAC926.04c|hsp90|I|Hsp90	SPAC926.04c|hsp90|I|Hsp90	38	38	38	>SPAC926.04c|hsp90|I|Hsp90 chaperone	1	38	38	38	37	32	37	27	37	32	37	27	37	32	37	27	57.1	57.1	57.1	80.595	704	704	0	323.31	By MS/MS	By MS/MS	By MS/MS	By MS/MS	57.1	52.8	57.1	46.4	7105500000	2080100000	1676200000	2003600000	1345600000	1618200000	1460100000	1593900000	1362200000	53	42	49
SPAC926.09c|fas1|I|fatty	SPAC926.09c|fas1|I|fatty	74	74	74	>SPAC926.09c|fas1|I|fatty acid synthase beta subunit Fas1	1	74	74	74	64	66	62	59	64	66	62	59	64	66	62	59	45.9	45.9	45.9	230.56	2073	2073	0	323.31	By MS/MS	By MS/MS	By MS/MS	By MS/MS	41.3	42.7	40.6	37.7	4640100000	1012400000	1509200000	1069300000	1049200000	783440000	1271800000	855960000	1073600000	62	80	67
SPAC959.03c|utp7|I|U3	SPAC959.03c|utp7|I|U3	2	2	2	>SPAC959.03c|utp7|I|U3 snoRNP-associated protein Utp7 (predicted)	1	2	2	2	1	1	1	1	1	1	1	1	1	1	1	1	6.9	6.9	6.9	59.757	520	520	0	5.6424	By MS/MS	By MS/MS	By matching	By MS/MS	3.7	3.7	3.7	3.3	18630000	6385600	5673100	6571500	0	0	0	5443300	0	1	1	0
SPAC959.08|rpl2102|I|60S	SPAC959.08|rpl2102|I|60S	3	1	1	>SPAC959.08|rpl2102|I|60S ribosomal protein L21 (predicted)	1	3	1	1	2	1	2	2	1	1	1	1	1	1	1	1	28.1	18.8	18.8	18.353	160	160	0.00081967	2.9883	By matching	By matching	By matching	By MS/MS	23.8	18.8	23.8	23.1	44559000	10473000	12957000	9515200	11614000	0	0	0	11614000	0	0	0
SPAC959.09c|apc5|I|anaphase-promoting	SPAC959.09c|apc5|I|anaphase-promoting	2	2	2	>SPAC959.09c|apc5|I|anaphase-promoting complex, platform subcomplex scaffold TPR subunit Apc5	1	2	2	2	0	2	1	0	0	2	1	0	0	2	1	0	3.6	3.6	3.6	86.048	744	744	0	4.9537	By matching	By MS/MS	By MS/MS	By matching	0	3.6	2.3	0	8711400	0	5194600	3516800	0	0	0	2913100	0	0	2	1
SPAC977.14c|SPAC977.14c|I|aldo/keto;SPAC750.01|SPAC750.01|I|aldo/keto	SPAC977.14c|SPAC977.14c|I|aldo/keto;SPAC750.01|SPAC750.01|I|aldo/keto	9;6	9;6	9;6	>SPAC977.14c|SPAC977.14c|I|aldo/keto reductase, predicted calcium channel regulator;>SPAC750.01|SPAC750.01|I|aldo/keto reductase family protein	2	9	9	9	7	4	5	6	7	4	5	6	7	4	5	6	26.2	26.2	26.2	39.914	351	351;325	0	36.467	By MS/MS	By MS/MS	By MS/MS	By MS/MS	23.4	10.8	16.2	19.9	107100000	31899000	25013000	25302000	24889000	23006000	26387000	23575000	21252000	7	4	3
SPAC9E9.03|leu2|I|3-isopropylmalate	SPAC9E9.03|leu2|I|3-isopropylmalate	22	22	22	>SPAC9E9.03|leu2|I|3-isopropylmalate dehydratase Leu2 (predicted)	1	22	22	22	15	19	16	18	15	19	16	18	15	19	16	18	36.8	36.8	36.8	82.782	758	758	0	136.13	By MS/MS	By MS/MS	By MS/MS	By MS/MS	24.7	32.8	29.2	34.4	542610000	118310000	174560000	98743000	150990000	103500000	125190000	92640000	138680000	14	18	12
SPAC9E9.04|SPAC9E9.04|I|bcap	SPAC9E9.04|SPAC9E9.04|I|bcap	4	4	4	>SPAC9E9.04|SPAC9E9.04|I|bcap family homolog (predicted)	1	4	4	4	4	2	4	1	4	2	4	1	4	2	4	1	29.3	29.3	29.3	21.238	188	188	0	21.3	By MS/MS	By MS/MS	By MS/MS	By matching	29.3	16	29.3	7.4	166140000	54661000	35276000	57960000	18243000	40442000	41418000	42404000	0	4	2	7
SPAC9E9.06c|SPAC9E9.06c|I|threonine	SPAC9E9.06c|SPAC9E9.06c|I|threonine	4	4	4	>SPAC9E9.06c|SPAC9E9.06c|I|threonine synthase (predicted)	1	4	4	4	4	4	2	1	4	4	2	1	4	4	2	1	10.5	10.5	10.5	57.631	514	514	0	18.415	By MS/MS	By MS/MS	By MS/MS	By MS/MS	10.5	10.5	5.3	2.7	35920000	14358000	13791000	5507200	2264500	9779100	10380000	8391100	0	1	4	1
SPAC9E9.09c|atd1|I|aldehyde	SPAC9E9.09c|atd1|I|aldehyde	24	24	24	>SPAC9E9.09c|atd1|I|aldehyde dehydrogenase (predicted)	1	24	24	24	23	21	20	21	23	21	20	21	23	21	20	21	62.4	62.4	62.4	54.768	503	503	0	312.45	By MS/MS	By MS/MS	By MS/MS	By MS/MS	60.2	58.1	56.5	56.7	2951300000	635880000	812380000	718690000	784380000	510490000	674310000	598850000	783740000	24	30	28
SPAC9E9.11|plr1|I|pyridoxal	SPAC9E9.11|plr1|I|pyridoxal	8	8	8	>SPAC9E9.11|plr1|I|pyridoxal reductase Plr1	1	8	8	8	6	6	6	6	6	6	6	6	6	6	6	6	27	27	27	36.814	333	333	0	38.478	By MS/MS	By MS/MS	By MS/MS	By MS/MS	19.8	19.2	20.1	20.1	144210000	31851000	45041000	34908000	32414000	28694000	35232000	31736000	31525000	6	5	6
SPAC9E9.13|wos2|I|p23	SPAC9E9.13|wos2|I|p23	1	1	1	>SPAC9E9.13|wos2|I|p23 homolog, predicted co-chaperone Wos2	1	1	1	1	1	0	1	0	1	0	1	0	1	0	1	0	4.3	4.3	4.3	20.951	186	186	0.0068966	2.2543	By MS/MS	By matching	By MS/MS	By matching	4.3	0	4.3	0	3150700	1972600	0	1178100	0	0	0	975830	0	1	0	1
SPAC9G1.02|wis4|I|MAP	SPAC9G1.02|wis4|I|MAP	13	13	13	>SPAC9G1.02|wis4|I|MAP kinase kinase kinase Wis4	1	13	13	13	10	9	10	9	10	9	10	9	10	9	10	9	12.7	12.7	12.7	160.54	1401	1401	0	43.527	By MS/MS	By MS/MS	By MS/MS	By MS/MS	9.9	9.1	9.7	8.4	192710000	47966000	42092000	53750000	48900000	38203000	41572000	44189000	46117000	9	7	7
SPAC9G1.03c|rpl3001|I|60S	SPAC9G1.03c|rpl3001|I|60S	3	3	3	>SPAC9G1.03c|rpl3001|I|60S ribosomal protein L30 (predicted)	1	3	3	3	2	3	2	2	2	3	2	2	2	3	2	2	44	44	44	11.591	109	109	0	12.96	By MS/MS	By MS/MS	By MS/MS	By MS/MS	26.6	44	26.6	28.4	51099000	14384000	14220000	12985000	9509900	11600000	9027000	10401000	13625000	3	3	2
SPAC9G1.05|aip1|I|actin	SPAC9G1.05|aip1|I|actin	4	4	4	>SPAC9G1.05|aip1|I|actin cortical patch component Aip1	1	4	4	4	4	4	3	3	4	4	3	3	4	4	3	3	6.2	6.2	6.2	65.266	595	595	0	8.7299	By MS/MS	By MS/MS	By MS/MS	By MS/MS	6.2	6.2	5	5	28357000	7108000	8183900	8619900	4445500	4940300	7815500	7447300	0	2	2	1
SPAC9G1.11c|spn4|I|mitotic	SPAC9G1.11c|spn4|I|mitotic	2	2	2	>SPAC9G1.11c|spn4|I|mitotic septin Spn4	1	2	2	2	1	1	1	1	1	1	1	1	1	1	1	1	5	5	5	44.773	380	380	0.0016103	2.806	By MS/MS	By matching	By MS/MS	By MS/MS	2.4	2.4	2.6	2.4	9309800	1994500	1434700	3819300	2061300	0	0	0	2061300	1	0	1
SPACUNK4.07c|cta4|I|P-type	SPACUNK4.07c|cta4|I|P-type	14	14	14	>SPACUNK4.07c|cta4|I|P-type ATPase, calcium transporting Cta4	1	14	14	14	8	12	11	7	8	12	11	7	8	12	11	7	16	16	16	136.26	1211	1211	0	62.685	By MS/MS	By MS/MS	By MS/MS	By MS/MS	9.1	14	12.5	8.4	168660000	33890000	46529000	57791000	30447000	29723000	37024000	42518000	35838000	7	7	10
SPACUNK4.10|SPACUNK4.10|I|glyoxylate	SPACUNK4.10|SPACUNK4.10|I|glyoxylate	8	8	8	>SPACUNK4.10|SPACUNK4.10|I|glyoxylate reductase (predicted)	1	8	8	8	6	7	6	7	6	7	6	7	6	7	6	7	32.6	32.6	32.6	36.701	334	334	0	24.868	By MS/MS	By MS/MS	By MS/MS	By MS/MS	22.2	27.5	22.2	26.6	131220000	31238000	38247000	31081000	30650000	27953000	32269000	26804000	28544000	4	6	7
SPACUNK4.12c|iph1|I|insulinase	SPACUNK4.12c|iph1|I|insulinase	1	1	1	>SPACUNK4.12c|iph1|I|insulinase pombe homologue 1	1	1	1	1	0	1	1	0	0	1	1	0	0	1	1	0	1.4	1.4	1.4	112.14	969	969	0.0090772	2.1594	By matching	By MS/MS	By MS/MS	By matching	0	1.4	1.4	0	4488600	0	2665200	1823400	0	0	0	1510400	0	0	0	0
SPACUNK4.16c|SPACUNK4.16c|I|alpha,alpha-trehalose-phosphate	SPACUNK4.16c|SPACUNK4.16c|I|alpha,alpha-trehalose-phosphate	29	29	29	>SPACUNK4.16c|SPACUNK4.16c|I|alpha,alpha-trehalose-phosphate synthase (predicted)	1	29	29	29	24	26	24	21	24	26	24	21	24	26	24	21	44.6	44.6	44.6	106.82	944	944	0	297.94	By MS/MS	By MS/MS	By MS/MS	By MS/MS	40.3	41	41.1	34	1729600000	351130000	489660000	413740000	475030000	306960000	407890000	325070000	432650000	31	28	25
SPAP11E10.01|SPAP11E10.01|I|ornithine	SPAP11E10.01|SPAP11E10.01|I|ornithine	9	9	9	>SPAP11E10.01|SPAP11E10.01|I|ornithine cyclodeaminase family (predicted)	1	9	9	9	7	6	5	5	7	6	5	5	7	6	5	5	36.4	36.4	36.4	35.799	330	330	0	26.65	By MS/MS	By MS/MS	By MS/MS	By MS/MS	27	23	21.2	18.5	82766000	24126000	19983000	20576000	18080000	15526000	18224000	19932000	18960000	5	3	5
SPAP27G11.10c|nup184|I|nucleoporin	SPAP27G11.10c|nup184|I|nucleoporin	6	6	6	>SPAP27G11.10c|nup184|I|nucleoporin Nup184	1	6	6	6	4	4	3	5	4	4	3	5	4	4	3	5	3.9	3.9	3.9	176.96	1564	1564	0	20.728	By MS/MS	By MS/MS	By MS/MS	By MS/MS	2.7	2.5	1.9	3.3	30280000	11067000	4905700	4006400	10300000	7521200	6607400	5991200	6981100	4	4	2
SPAP7G5.02c|gua2|I|GMP	SPAP7G5.02c|gua2|I|GMP	12	12	12	>SPAP7G5.02c|gua2|I|GMP synthase [glutamine-hydrolyzing] Gua2 (predicted)	1	12	12	12	9	11	9	10	9	11	9	10	9	11	9	10	26.3	26.3	26.3	60.044	539	539	0	59.565	By MS/MS	By MS/MS	By MS/MS	By MS/MS	21	23.7	19.9	24.3	307840000	50840000	111750000	59871000	85372000	55864000	82942000	54841000	81317000	8	13	7
SPAP7G5.04c|lys1|I|aminoadipate-semialdehyde	SPAP7G5.04c|lys1|I|aminoadipate-semialdehyde	44	44	44	>SPAP7G5.04c|lys1|I|aminoadipate-semialdehyde dehydrogenase	1	44	44	44	33	38	29	36	33	38	29	36	33	38	29	36	45.2	45.2	45.2	156.89	1419	1419	0	289.97	By MS/MS	By MS/MS	By MS/MS	By MS/MS	32.4	39.4	27.1	38.3	1625700000	302890000	598870000	259640000	464320000	285250000	479710000	252340000	437610000	27	46	23
SPAP7G5.05|rpl1002|I|60S	SPAP7G5.05|rpl1002|I|60S	9	1	1	>SPAP7G5.05|rpl1002|I|60S ribosomal protein L10	1	9	1	1	8	8	8	8	1	1	1	1	1	1	1	1	45.7	5	5	25.359	221	221	0	6.5484	By MS/MS	By MS/MS	By MS/MS	By MS/MS	32.6	40.7	32.6	40.7	25180000	7420700	4039600	7514700	6204900	0	0	0	4304300	1	1	1
SPAP8A3.05|ski7|I|ski	SPAP8A3.05|ski7|I|ski	2	2	2	>SPAP8A3.05|ski7|I|ski complex interacting GTPase Ski7	1	2	2	2	2	2	2	2	2	2	2	2	2	2	2	2	2.2	2.2	2.2	77.881	695	695	0.0039032	2.4263	By MS/MS	By MS/MS	By MS/MS	By MS/MS	2.2	2.2	2.2	2.2	3976700000	689480000	1341600000	666230000	1279400000	753430000	870730000	849420000	998940000	2	2	1
SPAP8A3.07c|SPAP8A3.07c|I|phospho-2-dehydro-3-deoxyheptonate	SPAP8A3.07c|SPAP8A3.07c|I|phospho-2-dehydro-3-deoxyheptonate	4	4	4	>SPAP8A3.07c|SPAP8A3.07c|I|phospho-2-dehydro-3-deoxyheptonate aldolase (predicted)	1	4	4	4	4	4	4	3	4	4	4	3	4	4	4	3	13.4	13.4	13.4	40.638	372	372	0	17.224	By MS/MS	By MS/MS	By MS/MS	By MS/MS	13.4	13.4	13.4	9.7	117330000	36442000	31309000	23587000	25989000	29548000	26364000	20900000	26369000	3	2	4
SPAP8A3.09c|paa1|I|protein	SPAP8A3.09c|paa1|I|protein	3	3	3	>SPAP8A3.09c|paa1|I|protein phosphatase regulatory subunit Paa1	1	3	3	3	3	2	2	2	3	2	2	2	3	2	2	2	5.9	5.9	5.9	66.616	590	590	0	6.3143	By MS/MS	By MS/MS	By matching	By MS/MS	5.9	3.2	3.2	3.2	32453000	15650000	5977500	5669800	5155500	6096200	8436700	6597900	6946500	1	2	0
SPAP8A3.12c|tpp2|I|tripeptidyl-peptidase	SPAP8A3.12c|tpp2|I|tripeptidyl-peptidase	3	3	3	>SPAP8A3.12c|tpp2|I|tripeptidyl-peptidase II Tpp2	1	3	3	3	1	1	2	3	1	1	2	3	1	1	2	3	3.5	3.5	3.5	142.92	1274	1274	0	7.8883	By matching	By matching	By MS/MS	By MS/MS	1	1	1.9	3.5	25843000	3172700	3911500	5977800	12781000	0	0	7332400	10400000	0	0	0
SPAPB17E12.11|ost3|I|oligosaccharyltransferase	SPAPB17E12.11|ost3|I|oligosaccharyltransferase	5	5	5	>SPAPB17E12.11|ost3|I|oligosaccharyltransferase gamma subunit Ost3 (predicted)	1	5	5	5	5	3	4	2	5	3	4	2	5	3	4	2	23	23	23	34.983	309	309	0	32.764	By MS/MS	By MS/MS	By MS/MS	By MS/MS	23	16.8	20.7	9.1	115880000	38377000	32344000	30924000	14237000	23008000	29118000	22013000	25881000	7	4	4
SPAPB17E12.13|rpl1802|I|60S;SPBC11C11.07|rpl1801|II|60S	SPAPB17E12.13|rpl1802|I|60S;SPBC11C11.07|rpl1801|II|60S	2;1	2;1	2;1	>SPAPB17E12.13|rpl1802|I|60S ribosomal protein L18 (predicted);>SPBC11C11.07|rpl1801|II|60S ribosomal protein L18	2	2	2	2	1	1	2	1	1	1	2	1	1	1	2	1	8	8	8	21.184	187	187;187	0	4.009	By MS/MS	By MS/MS	By MS/MS	By matching	4.3	4.3	8	4.3	10447000	2217900	3238100	2600300	2391100	0	0	0	2391100	1	1	1
SPAPB17E12.14c|SPAPB17E12.14c|I|6-phosphofructo-2-kinase/fructose-2,6-bisphosphate	SPAPB17E12.14c|SPAPB17E12.14c|I|6-phosphofructo-2-kinase/fructose-2,6-bisphosphate	7	7	7	>SPAPB17E12.14c|SPAPB17E12.14c|I|6-phosphofructo-2-kinase/fructose-2,6-bisphosphate 2-phosphatase (predicted)	1	7	7	7	6	5	7	5	6	5	7	5	6	5	7	5	13.6	13.6	13.6	76.392	668	668	0	33.405	By MS/MS	By MS/MS	By MS/MS	By MS/MS	10.6	7.5	13.6	9	165830000	47593000	32529000	55500000	30210000	34668000	29942000	35652000	30078000	5	6	4
SPAPB1A10.12c|alo1|I|D-arabinono-1,4-lactone	SPAPB1A10.12c|alo1|I|D-arabinono-1,4-lactone	4	4	4	>SPAPB1A10.12c|alo1|I|D-arabinono-1,4-lactone oxidase (predicted)	1	4	4	4	3	3	2	2	3	3	2	2	3	3	2	2	9.1	9.1	9.1	52.027	461	461	0	12.69	By MS/MS	By MS/MS	By MS/MS	By MS/MS	6.9	6.7	4.6	4.6	37469000	9335200	14785000	6383600	6964900	6932900	10003000	6896900	9108200	4	5	3
SPAPB1A10.16|SPAPB1A10.16|I|conserved	SPAPB1A10.16|SPAPB1A10.16|I|conserved	5	5	5	>SPAPB1A10.16|SPAPB1A10.16|I|conserved fungal protein	1	5	5	5	4	4	4	4	4	4	4	4	4	4	4	4	39.9	39.9	39.9	16.838	143	143	0	18.059	By MS/MS	By MS/MS	By MS/MS	By MS/MS	39.2	30.1	39.2	30.1	105030000	28171000	21086000	30657000	25116000	19761000	20343000	24827000	27421000	2	2	3
SPAPB1E7.05|gde1|I|glycerophosphoryl	SPAPB1E7.05|gde1|I|glycerophosphoryl	2	2	2	>SPAPB1E7.05|gde1|I|glycerophosphoryl diester phosphodiesterase Gde1 (predicted)	1	2	2	2	0	0	1	2	0	0	1	2	0	0	1	2	1.7	1.7	1.7	118.13	1076	1076	0	5.66	By matching	By matching	By matching	By MS/MS	0	0	0.7	1.7	9632800	0	0	3112000	6520800	0	0	0	6520800	0	0	0
SPAPB1E7.07|glt1|I|glutamate	SPAPB1E7.07|glt1|I|glutamate	61	61	61	>SPAPB1E7.07|glt1|I|glutamate synthase Glt1 (predicted)	1	61	61	61	54	54	52	48	54	54	52	48	54	54	52	48	39.5	39.5	39.5	232.85	2111	2111	0	323.31	By MS/MS	By MS/MS	By MS/MS	By MS/MS	33.5	36.2	33.1	30.8	2579300000	586010000	755280000	583180000	654790000	442730000	638580000	481650000	663930000	50	57	53
SPAPB1E7.09|ogm2|I|protein	SPAPB1E7.09|ogm2|I|protein	13	13	13	>SPAPB1E7.09|ogm2|I|protein O-mannosyltransferase Ogm2	1	13	13	13	10	12	10	10	10	12	10	10	10	12	10	10	26.3	26.3	26.3	85.036	739	739	0	153.01	By MS/MS	By MS/MS	By MS/MS	By MS/MS	18.7	24.4	17.5	18.1	461690000	90441000	136050000	123830000	111370000	90616000	99594000	96926000	120940000	9	10	10
SPAPB1E7.12|rps602|I|40S;SPAC13G6.07c|rps601|I|40S	SPAPB1E7.12|rps602|I|40S;SPAC13G6.07c|rps601|I|40S	4;3	4;3	4;3	>SPAPB1E7.12|rps602|I|40S ribosomal protein S6;>SPAC13G6.07c|rps601|I|40S ribosomal protein S6	2	4	4	4	4	3	4	2	4	3	4	2	4	3	4	2	23.4	23.4	23.4	27.475	239	239;239	0	16.79	By MS/MS	By MS/MS	By MS/MS	By MS/MS	23.4	19.7	23.4	12.6	72337000	23301000	20469000	16532000	12036000	14301000	15997000	12241000	0	3	2	3
SPAPB21F2.02|dop1|I|Dopey	SPAPB21F2.02|dop1|I|Dopey	3	3	3	>SPAPB21F2.02|dop1|I|Dopey family protein Dop1	1	3	3	3	1	1	2	2	1	1	2	2	1	1	2	2	2.3	2.3	2.3	192.65	1687	1687	0	4.268	By matching	By MS/MS	By MS/MS	By MS/MS	0.9	0.9	1.4	1.7	11881000	1742200	1851000	4331600	3955900	0	0	0	3955900	0	1	1
SPAPB8E5.03|mae1|I|malic	SPAPB8E5.03|mae1|I|malic	2	2	2	>SPAPB8E5.03|mae1|I|malic acid transport protein Mae1	1	2	2	2	2	2	2	2	2	2	2	2	2	2	2	2	4.1	4.1	4.1	49.304	438	438	0	8.9801	By MS/MS	By MS/MS	By MS/MS	By MS/MS	4.1	4.1	4.1	4.1	51704000	12023000	12396000	15432000	11853000	10021000	10807000	12710000	11928000	2	2	2
SPAPB8E5.07c|rrp12|I|rRNA	SPAPB8E5.07c|rrp12|I|rRNA	6	6	6	>SPAPB8E5.07c|rrp12|I|rRNA processing protein Rrp12 (predicted)	1	6	6	6	6	5	5	3	6	5	5	3	6	5	5	3	6.2	6.2	6.2	130.53	1163	1163	0	18.081	By MS/MS	By MS/MS	By MS/MS	By MS/MS	6.2	5.2	5.2	2.5	72776000	27108000	16468000	16420000	12779000	18444000	16670000	15405000	0	4	4	3
SPAPB8E5.09|rvb1|I|AAA	SPAPB8E5.09|rvb1|I|AAA	4	4	4	>SPAPB8E5.09|rvb1|I|AAA family ATPase Rvb1	1	4	4	4	2	3	3	4	2	3	3	4	2	3	3	4	11.6	11.6	11.6	50.052	456	456	0	42.168	By MS/MS	By MS/MS	By MS/MS	By MS/MS	6.4	9.4	9.4	11.6	57319000	11537000	20071000	10868000	14843000	0	16322000	0	16083000	1	2	2
SPAPJ696.01c|vps17|I|retromer	SPAPJ696.01c|vps17|I|retromer	6	6	6	>SPAPJ696.01c|vps17|I|retromer complex subunit Vps17	1	6	6	6	6	4	6	4	6	4	6	4	6	4	6	4	13.8	13.8	13.8	60.92	549	549	0	19.983	By MS/MS	By MS/MS	By MS/MS	By MS/MS	13.8	8.9	13.8	8.9	139680000	46035000	26896000	42898000	23851000	24670000	31935000	28646000	35892000	4	4	5
SPAPJ698.02c|rps002|I|40S	SPAPJ698.02c|rps002|I|40S	9	9	8	>SPAPJ698.02c|rps002|I|40S ribosomal protein S0B	1	9	9	8	7	7	8	5	7	7	8	5	6	6	7	4	40.1	40.1	35.5	31.42	287	287	0	59.893	By MS/MS	By MS/MS	By MS/MS	By MS/MS	29.3	27.2	38.3	27.2	222580000	54317000	65381000	58665000	44212000	45596000	47606000	49988000	51926000	7	6	8
SPAPYUG7.05|SPAPYUG7.05|I|delta-1-pyrroline-5-carboxylate	SPAPYUG7.05|SPAPYUG7.05|I|delta-1-pyrroline-5-carboxylate	1	1	1	>SPAPYUG7.05|SPAPYUG7.05|I|delta-1-pyrroline-5-carboxylate reductase (predicted)	1	1	1	1	1	0	1	0	1	0	1	0	1	0	1	0	5	5	5	29.875	282	282	0.00081633	2.9373	By MS/MS	By matching	By matching	By matching	5	0	5	0	7313300	2323100	0	4990100	0	0	0	4133500	0	1	0	0
SPAPYUK71.03c|syn1|I|synaptotagmin	SPAPYUK71.03c|syn1|I|synaptotagmin	3	3	3	>SPAPYUK71.03c|syn1|I|synaptotagmin family C2 domain protein, Syn1	1	3	3	3	2	2	2	2	2	2	2	2	2	2	2	2	3.2	3.2	3.2	135.78	1225	1225	0	12.84	By MS/MS	By MS/MS	By MS/MS	By MS/MS	2	2	2	2.4	30611000	7368100	7657400	8829900	6755300	6487400	6363400	7281600	0	1	2	2
SPBC106.03|SPBC106.03|II|DUF1776	SPBC106.03|SPBC106.03|II|DUF1776	5	5	5	>SPBC106.03|SPBC106.03|II|DUF1776 family protein	1	5	5	5	4	4	2	4	4	4	2	4	4	4	2	4	18.8	18.8	18.8	40.006	357	357	0	16.155	By MS/MS	By MS/MS	By MS/MS	By MS/MS	16	13.2	5.6	13.2	75357000	23329000	15734000	24197000	12097000	21768000	12536000	0	10931000	4	3	1
SPBC106.04|ada1|II|adenosine	SPBC106.04|ada1|II|adenosine	23	23	23	>SPBC106.04|ada1|II|adenosine deaminase Ada1	1	23	23	23	21	17	20	16	21	17	20	16	21	17	20	16	35.7	35.7	35.7	95.886	831	831	0	191	By MS/MS	By MS/MS	By MS/MS	By MS/MS	32.3	24.3	29	24.2	944910000	292080000	202680000	263390000	186760000	213240000	190460000	203420000	211050000	20	15	17
SPBC106.06|cct4|II|chaperonin-containing	SPBC106.06|cct4|II|chaperonin-containing	19	19	19	>SPBC106.06|cct4|II|chaperonin-containing T-complex delta subunit Cct4	1	19	19	19	16	14	17	14	16	14	17	14	16	14	17	14	40.4	40.4	40.4	56.968	527	527	0	128.43	By MS/MS	By MS/MS	By MS/MS	By MS/MS	34.2	32.4	38.1	30.4	1705200000	1023200000	300060000	138340000	243550000	349630000	350780000	348230000	421690000	19	15	15
SPBC106.09|cut4|II|anaphase-promoting	SPBC106.09|cut4|II|anaphase-promoting	1	1	1	>SPBC106.09|cut4|II|anaphase-promoting complex, platform subcomplex scaffold subunit Apc1	1	1	1	1	1	1	1	1	1	1	1	1	1	1	1	1	0.5	0.5	0.5	165.41	1458	1458	0	3.2506	By MS/MS	By MS/MS	By MS/MS	By MS/MS	0.5	0.5	0.5	0.5	27935000	8173100	5856200	6975400	6929800	0	0	0	6929800	1	1	1
SPBC106.10|pka1|II|cAMP-dependent	SPBC106.10|pka1|II|cAMP-dependent	3	3	3	>SPBC106.10|pka1|II|cAMP-dependent protein kinase catalytic subunit Pka1	1	3	3	3	2	2	2	2	2	2	2	2	2	2	2	2	9.6	9.6	9.6	57.577	512	512	0	5.9015	By MS/MS	By matching	By matching	By MS/MS	5.5	5.5	5.5	6.2	29341000	5030300	4871800	4718900	14720000	0	0	0	14720000	0	0	0
SPBC106.11c|plg7|II|phospholipase	SPBC106.11c|plg7|II|phospholipase	1	1	1	>SPBC106.11c|plg7|II|phospholipase A2, PAF family homolog	1	1	1	1	0	1	1	1	0	1	1	1	0	1	1	1	3.4	3.4	3.4	49.846	438	438	0	3.1672	By matching	By MS/MS	By matching	By MS/MS	0	3.4	3.4	3.4	3879600	0	0	2218100	1661500	0	0	0	1661500	0	1	0
SPBC106.13|gid9|II|GID	SPBC106.13|gid9|II|GID	2	2	2	>SPBC106.13|gid9|II|GID complex subunit Gid9 (predicted)	1	2	2	2	0	1	1	1	0	1	1	1	0	1	1	1	6.7	6.7	6.7	45.857	404	404	0	3.7609	By matching	By MS/MS	By MS/MS	By matching	0	3.2	3.5	3.2	5971100	0	727130	4301600	942380	0	0	3563200	0	0	1	0
SPBC106.16|pre6|II|20S	SPBC106.16|pre6|II|20S	2	2	2	>SPBC106.16|pre6|II|20S proteasome complex subunit alpha 4 Pre6	1	2	2	2	1	0	2	1	1	0	2	1	1	0	2	1	9.7	9.7	9.7	28.277	259	259	0	5.9697	By MS/MS	By matching	By MS/MS	By MS/MS	5.4	0	9.7	5.4	20763000	4466900	0	9179500	7116600	0	0	7603600	0	1	0	1
SPBC106.17c|cys2|II|homoserine	SPBC106.17c|cys2|II|homoserine	4	4	4	>SPBC106.17c|cys2|II|homoserine O-acetyltransferase (predicted)	1	4	4	4	3	2	1	2	3	2	1	2	3	2	1	2	10.7	10.7	10.7	56.362	504	504	0	15.103	By MS/MS	By MS/MS	By MS/MS	By MS/MS	8.1	4.6	2	4.6	36312000	6566300	13512000	3908600	12325000	0	14563000	0	9585600	2	3	1
SPBC1105.02c|lys4|II|homocitrate	SPBC1105.02c|lys4|II|homocitrate	13	13	13	>SPBC1105.02c|lys4|II|homocitrate synthase	1	13	13	13	11	11	11	10	11	11	11	10	11	11	11	10	40.9	40.9	40.9	46.292	418	418	0	170.34	By MS/MS	By MS/MS	By MS/MS	By MS/MS	32.5	33.3	32.5	34.9	566470000	143610000	182730000	113780000	126350000	104280000	148360000	101200000	118390000	11	13	10
SPBC115.02c|afg1|II|AFG1	SPBC115.02c|afg1|II|AFG1	2	2	2	>SPBC115.02c|afg1|II|AFG1 family mitochondrial ATPase Afg1 (predicted)	1	2	2	2	2	0	1	1	2	0	1	1	2	0	1	1	5.5	5.5	5.5	51.552	454	454	0	6.3336	By MS/MS	By matching	By MS/MS	By MS/MS	5.5	0	3.1	3.1	5791900	1640900	0	2172300	1978800	0	0	0	1978800	2	0	1
SPBC119.01|rpn3|II|19S	SPBC119.01|rpn3|II|19S	8	8	8	>SPBC119.01|rpn3|II|19S proteasome regulatory subunit Rpn3	1	8	8	8	6	5	6	5	6	5	6	5	6	5	6	5	17.7	17.7	17.7	57.346	497	497	0	25.449	By MS/MS	By MS/MS	By MS/MS	By MS/MS	11.9	10.3	13.3	11.3	71865000	15458000	20056000	16497000	19855000	13215000	18901000	15200000	16588000	5	3	5
SPBC119.02|ubc4|II|ubiquitin	SPBC119.02|ubc4|II|ubiquitin	1	1	1	>SPBC119.02|ubc4|II|ubiquitin conjugating enzyme E2 Ubc4/UbcP1	1	1	1	1	1	1	1	1	1	1	1	1	1	1	1	1	7.5	7.5	7.5	16.476	147	147	0	4.2616	By MS/MS	By MS/MS	By MS/MS	By MS/MS	7.5	7.5	7.5	7.5	103110000	25382000	26470000	34200000	17060000	0	0	0	17060000	1	1	1
SPBC119.07|ppk19|II|serine/threonine	SPBC119.07|ppk19|II|serine/threonine	2	2	2	>SPBC119.07|ppk19|II|serine/threonine protein kinase Ppk19	1	2	2	2	1	1	1	2	1	1	1	2	1	1	1	2	0.9	0.9	0.9	191.09	1706	1706	0	3.6865	By MS/MS	By matching	By MS/MS	By MS/MS	0.4	0.4	0.4	0.9	108830000	22952000	28282000	24282000	33319000	0	0	0	33319000	1	0	1
SPBC119.08|pmk1|II|MAP	SPBC119.08|pmk1|II|MAP	8	8	7	>SPBC119.08|pmk1|II|MAP kinase Pmk1	1	8	8	7	7	7	7	7	7	7	7	7	6	6	6	7	21.3	21.3	19.4	48.261	422	422	0	23.339	By MS/MS	By MS/MS	By MS/MS	By MS/MS	17.5	17.5	17.5	19.4	133040000	30828000	37751000	30315000	34143000	24894000	35468000	23917000	33606000	6	5	5
SPBC119.10|asn1|II|asparagine	SPBC119.10|asn1|II|asparagine	32	32	32	>SPBC119.10|asn1|II|asparagine synthetase	1	32	32	32	29	27	29	23	29	27	29	23	29	27	29	23	72.9	72.9	72.9	63.24	557	557	0	323.31	By MS/MS	By MS/MS	By MS/MS	By MS/MS	65.2	63.7	65.9	59.2	4199000000	1156400000	1074300000	970630000	997630000	987640000	884700000	859040000	970510000	28	29	29
SPBC1198.02|dea2|II|adenine	SPBC1198.02|dea2|II|adenine	3	3	3	>SPBC1198.02|dea2|II|adenine deaminase Dea2	1	3	3	3	2	2	3	2	2	2	3	2	2	2	3	2	10.1	10.1	10.1	41.198	367	367	0	13.034	By MS/MS	By MS/MS	By MS/MS	By MS/MS	5.4	5.4	10.1	7.4	121230000	28033000	29228000	36615000	27353000	0	0	26684000	26371000	2	1	3
SPBC1198.08|dug1|II|dipeptidase	SPBC1198.08|dug1|II|dipeptidase	5	5	5	>SPBC1198.08|dug1|II|dipeptidase Dug1 (predicted)	1	5	5	5	5	5	4	5	5	5	4	5	5	5	4	5	12.6	12.6	12.6	52.84	476	476	0	16.87	By MS/MS	By MS/MS	By MS/MS	By MS/MS	12.6	12.6	10.7	12.6	117990000	27637000	34165000	26104000	30088000	26793000	26422000	24399000	26939000	5	5	3
SPBC11B10.01|alg2|II|mannosyltransferase	SPBC11B10.01|alg2|II|mannosyltransferase	2	2	2	>SPBC11B10.01|alg2|II|mannosyltransferase complex subunit Alg2 (predicted)	1	2	2	2	2	2	2	2	2	2	2	2	2	2	2	2	4.9	4.9	4.9	57.166	506	506	0	6.392	By MS/MS	By MS/MS	By MS/MS	By MS/MS	4.9	4.9	4.9	4.9	43224000	8535100	11425000	11004000	12260000	7117300	9967500	9085600	12289000	1	2	2
SPBC11B10.02c|his3|II|histidinol-phosphate	SPBC11B10.02c|his3|II|histidinol-phosphate	6	6	6	>SPBC11B10.02c|his3|II|histidinol-phosphate aminotransferase imidazole acetol phosphate transaminase His3	1	6	6	6	4	6	4	4	4	6	4	4	4	6	4	4	17.2	17.2	17.2	42.733	384	384	0	16.585	By MS/MS	By MS/MS	By MS/MS	By MS/MS	11.2	17.2	11.2	11.2	51824000	11065000	18472000	10310000	11978000	9471800	14107000	8843800	13446000	0	4	1
SPBC11B10.03|cog8|II|Golgi	SPBC11B10.03|cog8|II|Golgi	2	2	2	>SPBC11B10.03|cog8|II|Golgi transport complex subunit Cog8 (predicted)	1	2	2	2	2	1	2	1	2	1	2	1	2	1	2	1	6.9	6.9	6.9	44.08	378	378	0	4.9697	By MS/MS	By MS/MS	By matching	By MS/MS	6.9	3.4	6.9	3.4	18620000	6404900	2919700	5500600	3794600	0	0	4556300	0	1	2	0
SPBC11B10.05c|rsp1|II|random	SPBC11B10.05c|rsp1|II|random	7	7	7	>SPBC11B10.05c|rsp1|II|random septum position protein Rsp1	1	7	7	7	5	3	4	3	5	3	4	3	5	3	4	3	21.1	21.1	21.1	56.288	494	494	0	53.547	By MS/MS	By MS/MS	By MS/MS	By MS/MS	16	9.3	11.3	9.3	92011000	35200000	14737000	27747000	14328000	20037000	20452000	17535000	21410000	4	2	4
SPBC11B10.09|cdc2|II|cyclin-dependent	SPBC11B10.09|cdc2|II|cyclin-dependent	3	3	2	>SPBC11B10.09|cdc2|II|cyclin-dependent protein kinase Cdk1/Cdc2	1	3	3	2	2	3	2	2	2	3	2	2	1	2	1	1	10.1	10.1	7.4	34.358	297	297	0	10.455	By MS/MS	By MS/MS	By MS/MS	By MS/MS	6.1	10.1	6.1	6.1	21573000	5749300	4498800	7576500	3748800	0	4013500	6201200	3746500	2	3	2
SPBC11B10.10c|pht1|II|histone	SPBC11B10.10c|pht1|II|histone	2	2	1	>SPBC11B10.10c|pht1|II|histone H2A variant H2A.Z, Pht1	1	2	2	1	2	2	2	2	2	2	2	2	1	1	1	1	11.5	11.5	6.5	15.025	139	139	0	15.367	By MS/MS	By MS/MS	By MS/MS	By MS/MS	11.5	11.5	11.5	11.5	359930000	15900000	8917900	324080000	11038000	13933000	8350500	266750000	11458000	1	2	2
SPBC11C11.06c|SPBC11C11.06c|II|Schizosaccharomyces	SPBC11C11.06c|SPBC11C11.06c|II|Schizosaccharomyces	2	2	2	>SPBC11C11.06c|SPBC11C11.06c|II|Schizosaccharomyces specific protein	1	2	2	2	2	1	2	0	2	1	2	0	2	1	2	0	18	18	18	19.126	178	178	0	8.6286	By MS/MS	By MS/MS	By MS/MS	By matching	18	10.7	18	0	24284000	3778100	5935800	14570000	0	0	0	12069000	0	1	2	3
SPBC1215.01|shy1|II|cytochrome	SPBC1215.01|shy1|II|cytochrome	1	1	1	>SPBC1215.01|shy1|II|cytochrome c oxidase assembly protein Shy1 (predicted)	1	1	1	1	1	1	1	1	1	1	1	1	1	1	1	1	3.4	3.4	3.4	33.38	290	290	0	3.2434	By MS/MS	By MS/MS	By MS/MS	By MS/MS	3.4	3.4	3.4	3.4	8841900	2216700	2428100	2002600	2194500	0	0	0	2194500	1	1	1
SPBC1215.02c|naa25|II|NatB	SPBC1215.02c|naa25|II|NatB	16	16	16	>SPBC1215.02c|naa25|II|NatB N-acetyltransferase complex regulatory subunit Naa25	1	16	16	16	9	13	11	15	9	13	11	15	9	13	11	15	25.8	25.8	25.8	92.456	811	811	0	60.583	By MS/MS	By MS/MS	By MS/MS	By MS/MS	13.3	19.6	16.8	24.4	252320000	34212000	71324000	62333000	84449000	41892000	63264000	56100000	65643000	6	13	11
SPBC1271.02|stt3|II|oligosaccharyltransferase	SPBC1271.02|stt3|II|oligosaccharyltransferase	10	10	10	>SPBC1271.02|stt3|II|oligosaccharyltransferase subunit Stt3	1	10	10	10	7	8	7	6	7	8	7	6	7	8	7	6	13.3	13.3	13.3	84.973	752	752	0	33.6	By MS/MS	By MS/MS	By MS/MS	By MS/MS	10.8	10.5	10.8	8.9	141810000	36557000	40320000	38574000	26360000	28591000	31151000	33206000	31000000	6	9	4
SPBC1271.12|kes1|II|oxysterol	SPBC1271.12|kes1|II|oxysterol	4	4	4	>SPBC1271.12|kes1|II|oxysterol binding protein (predicted)	1	4	4	4	4	3	3	2	4	3	3	2	4	3	3	2	9.5	9.5	9.5	44.591	388	388	0	12.466	By MS/MS	By MS/MS	By MS/MS	By MS/MS	9.5	7	7	4.9	33986000	7798200	10864000	9073800	6250400	7774700	7547900	6212100	8213100	4	4	3
SPBC1289.03c|spi1|II|Ran	SPBC1289.03c|spi1|II|Ran	8	8	8	>SPBC1289.03c|spi1|II|Ran GTPase Spi1	1	8	8	8	7	8	8	6	7	8	8	6	7	8	8	6	34.3	34.3	34.3	24.555	216	216	0	24.98	By MS/MS	By MS/MS	By MS/MS	By MS/MS	29.6	34.3	34.3	30.1	379140000	89666000	100140000	101970000	87361000	72179000	81882000	88572000	91274000	6	6	6
SPBC1289.06c|ppr8|II|mitochondrial	SPBC1289.06c|ppr8|II|mitochondrial	5	5	5	>SPBC1289.06c|ppr8|II|mitochondrial PPR repeat protein Ppr8	1	5	5	5	4	3	3	3	4	3	3	3	4	3	3	3	15.8	15.8	15.8	54.652	481	481	0	13.132	By MS/MS	By MS/MS	By MS/MS	By MS/MS	13.5	8.3	8.5	8.3	55753000	17949000	15943000	9744900	12115000	13463000	13362000	10503000	11714000	4	3	2
SPBC1289.07c|rpc40|II|DNA-directed	SPBC1289.07c|rpc40|II|DNA-directed	1	1	1	>SPBC1289.07c|rpc40|II|DNA-directed RNA polymerase I and III subunit Rpc40	1	1	1	1	1	1	1	1	1	1	1	1	1	1	1	1	5.2	5.2	5.2	39.154	348	348	0.0054096	2.3125	By matching	By MS/MS	By matching	By MS/MS	5.2	5.2	5.2	5.2	9751500	1428500	3030100	2165600	3127300	0	0	0	3127300	0	1	0
SPBC1289.09|tim21|II|TIM23	SPBC1289.09|tim21|II|TIM23	4	4	4	>SPBC1289.09|tim21|II|TIM23 translocase complex subunit Tim21 (predicted)	1	4	4	4	4	3	3	3	4	3	3	3	4	3	3	3	16.1	16.1	16.1	25.568	223	223	0	11.745	By MS/MS	By MS/MS	By MS/MS	By MS/MS	16.1	16.1	16.1	16.1	49710000	13629000	17381000	7554100	11145000	10104000	12041000	9566600	12216000	4	4	3
SPBC1289.11|spf38|II|U5	SPBC1289.11|spf38|II|U5	1	1	1	>SPBC1289.11|spf38|II|U5 snRNP complex subunit Spf38	1	1	1	1	0	1	0	0	0	1	0	0	0	1	0	0	2.9	2.9	2.9	37.427	340	340	0.0083523	2.1999	By matching	By MS/MS	By matching	By matching	0	2.9	0	0	0	0	0	0	0	0	0	0	0	0	1	0
SPBC1289.13c|gmh6|II|alpha-1,2-galactosyltransferase	SPBC1289.13c|gmh6|II|alpha-1,2-galactosyltransferase	2	2	2	>SPBC1289.13c|gmh6|II|alpha-1,2-galactosyltransferase Gmh6	1	2	2	2	2	2	2	2	2	2	2	2	2	2	2	2	4.5	4.5	4.5	43.117	375	375	0	9.9119	By MS/MS	By MS/MS	By MS/MS	By MS/MS	4.5	4.5	4.5	4.5	9770000	1114300	1869000	2950100	3836500	0	0	2439100	3841100	1	2	1
SPBC1289.14|SPBC1289.14|II|adducin	SPBC1289.14|SPBC1289.14|II|adducin	1	1	1	>SPBC1289.14|SPBC1289.14|II|adducin (predicted)	1	1	1	1	1	0	0	0	1	0	0	0	1	0	0	0	4.6	4.6	4.6	35.932	324	324	0	3.3877	By MS/MS	By matching	By matching	By matching	4.6	0	0	0	0	0	0	0	0	0	0	0	0	1	0	0
SPBC1289.16c|cao2|II|copper	SPBC1289.16c|cao2|II|copper	17	16	16	>SPBC1289.16c|cao2|II|copper amine oxidase-like protein Cao2	1	17	16	16	10	9	15	11	9	8	14	10	9	8	14	10	26.8	25.3	25.3	90.126	794	794	0	67.859	By MS/MS	By MS/MS	By MS/MS	By MS/MS	19	15.6	25.6	18.4	250620000	66374000	40275000	94048000	49922000	53037000	47643000	57297000	60201000	9	7	15
SPBC12C2.04|SPBC12C2.04|II|NAD	SPBC12C2.04|SPBC12C2.04|II|NAD	3	3	3	>SPBC12C2.04|SPBC12C2.04|II|NAD binding dehydrogenase family protein	1	3	3	3	2	2	3	2	2	2	3	2	2	2	3	2	10.7	10.7	10.7	43.031	384	384	0	10.948	By MS/MS	By MS/MS	By MS/MS	By MS/MS	7	7.3	10.7	7.3	42670000	9890000	11955000	9275200	11549000	0	11524000	0	10486000	2	2	2
SPBC12C2.06|dbp5|II|cytoplasmic	SPBC12C2.06|dbp5|II|cytoplasmic	4	4	4	>SPBC12C2.06|dbp5|II|cytoplasmic ATP-dependent RNA helicase Dbp5 (predicted)	1	4	4	4	4	4	1	0	4	4	1	0	4	4	1	0	9.9	9.9	9.9	56.304	503	503	0	13.109	By MS/MS	By MS/MS	By matching	By matching	9.9	9.9	3.2	0	31301000	14694000	14417000	2189800	0	12247000	12569000	0	0	3	4	0
SPBC12C2.07c|srm1|II|spermidine	SPBC12C2.07c|srm1|II|spermidine	6	6	6	>SPBC12C2.07c|srm1|II|spermidine synthase Srm1 (predicted)	1	6	6	6	6	6	2	4	6	6	2	4	6	6	2	4	28.2	28.2	28.2	33.149	298	298	0	18.044	By MS/MS	By MS/MS	By MS/MS	By MS/MS	28.2	28.2	6.7	15.1	112980000	34682000	49303000	11501000	17497000	23371000	28589000	21604000	25399000	4	6	1
SPBC12C2.11|SPBC12C2.11|II|glutamine-fructose-6-phosphate	SPBC12C2.11|SPBC12C2.11|II|glutamine-fructose-6-phosphate	17	17	17	>SPBC12C2.11|SPBC12C2.11|II|glutamine-fructose-6-phosphate transaminase (predicted)	1	17	17	17	13	15	15	10	13	15	15	10	13	15	15	10	27.2	27.2	27.2	77.321	696	696	0	88.481	By MS/MS	By MS/MS	By MS/MS	By MS/MS	20.7	22.7	23.1	14.5	257980000	57048000	68414000	70693000	61826000	46094000	62560000	48477000	70484000	6	13	8
SPBC12C2.13c|fnx1|II|vacuolar	SPBC12C2.13c|fnx1|II|vacuolar	1	1	1	>SPBC12C2.13c|fnx1|II|vacuolar membrane amino acid transmembrane transporter Fnx1	1	1	1	1	0	1	1	0	0	1	1	0	0	1	1	0	2.1	2.1	2.1	58.058	531	531	0.00080841	2.8487	By matching	By MS/MS	By MS/MS	By matching	0	2.1	2.1	0	8305700	0	3736200	4569500	0	0	0	3785000	0	0	1	1
SPBC12D12.03|cct1|II|chaperonin-containing	SPBC12D12.03|cct1|II|chaperonin-containing	9	9	9	>SPBC12D12.03|cct1|II|chaperonin-containing T-complex alpha subunit Cct1	1	9	9	9	6	6	6	4	6	6	6	4	6	6	6	4	22.1	22.1	22.1	60.046	556	556	0	49.82	By MS/MS	By MS/MS	By MS/MS	By MS/MS	13.8	13.8	12.6	11.9	88768000	27247000	22772000	20145000	18605000	21360000	17575000	20302000	18604000	3	5	4
SPBC12D12.04c|pck2|II|protein	SPBC12D12.04c|pck2|II|protein	8	8	8	>SPBC12D12.04c|pck2|II|protein kinase C (PKC)-like Pck2	1	8	8	8	6	7	7	6	6	7	7	6	6	7	7	6	9.7	9.7	9.7	116	1016	1016	0	30.181	By MS/MS	By MS/MS	By MS/MS	By MS/MS	6.4	7.8	7.8	7.9	80521000	18400000	19666000	23707000	18748000	18606000	13031000	19922000	19313000	4	3	5
SPBC13A2.02|nup82|II|nucleoporin;REV__SPAC323.05c|mtq2|I|protein	SPBC13A2.02|nup82|II|nucleoporin	13;1	13;1	13;1	>SPBC13A2.02|nup82|II|nucleoporin Nup82	2	13	13	13	13	10	10	9	13	10	10	9	13	10	10	9	19.1	19.1	19.1	90.611	803	803;231	0	52.951	By MS/MS	By MS/MS	By MS/MS	By MS/MS	19.1	13.4	13.4	12.6	304920000	141750000	74453000	47226000	41491000	113190000	65227000	40294000	44744000	12	9	5
SPBC13A2.03|SPBC13A2.03|II|phosphatidate	SPBC13A2.03|SPBC13A2.03|II|phosphatidate	1	1	1	>SPBC13A2.03|SPBC13A2.03|II|phosphatidate cytidylyltransferase (predicted)	1	1	1	1	1	1	1	1	1	1	1	1	1	1	1	1	2.1	2.1	2.1	49.936	439	439	0	3.4546	By MS/MS	By MS/MS	By MS/MS	By MS/MS	2.1	2.1	2.1	2.1	14577000	3742600	3360900	3742600	3730900	0	0	0	3730900	1	1	1
SPBC13G1.02|mpg2|II|mannose-1-phosphate	SPBC13G1.02|mpg2|II|mannose-1-phosphate	14	14	14	>SPBC13G1.02|mpg2|II|mannose-1-phosphate guanyltransferase (predicted)	1	14	14	14	9	14	12	11	9	14	12	11	9	14	12	11	47.8	47.8	47.8	46.096	414	414	0	101.92	By MS/MS	By MS/MS	By MS/MS	By MS/MS	31.4	47.8	35	38.2	497750000	88534000	160630000	118780000	129810000	90181000	126840000	107130000	113410000	7	15	8
SPBC146.01|med15|II|mediator	SPBC146.01|med15|II|mediator	15	15	15	>SPBC146.01|med15|II|mediator complex subunit Med15	1	15	15	15	15	12	12	11	15	12	12	11	15	12	12	11	18	18	18	118.45	1063	1063	0	136.09	By MS/MS	By MS/MS	By MS/MS	By MS/MS	18	15.2	13	13.7	459340000	173890000	103280000	86410000	95763000	134960000	81551000	92189000	93389000	16	9	11
SPBC146.13c|myo1|II|myosin	SPBC146.13c|myo1|II|myosin	6	6	6	>SPBC146.13c|myo1|II|myosin type I	1	6	6	6	5	4	5	4	5	4	5	4	5	4	5	4	5.2	5.2	5.2	135.71	1217	1217	0	16.192	By MS/MS	By MS/MS	By MS/MS	By MS/MS	4.5	3.5	4.2	3.5	61407000	16628000	10608000	22272000	11899000	13682000	11325000	17676000	10753000	3	3	4
SPBC146.14c|sec26|II|coatomer	SPBC146.14c|sec26|II|coatomer	10	10	10	>SPBC146.14c|sec26|II|coatomer beta subunit (predicted)	1	10	10	10	6	6	7	5	6	6	7	5	6	6	7	5	16.5	16.5	16.5	104.7	940	940	0	34.413	By MS/MS	By MS/MS	By MS/MS	By MS/MS	8.6	10.4	11.2	7	136560000	34264000	37879000	30873000	33542000	28120000	30249000	26365000	35976000	5	4	5
SPBC14C8.03|fma2|II|methionine	SPBC14C8.03|fma2|II|methionine	2	2	2	>SPBC14C8.03|fma2|II|methionine aminopeptidase Fma2 (predicted)	1	2	2	2	1	2	0	1	1	2	0	1	1	2	0	1	6.1	6.1	6.1	47.271	426	426	0	6.3075	By MS/MS	By MS/MS	By matching	By MS/MS	2.3	6.1	0	2.3	8370400	0	6417400	0	1953000	0	5615300	0	0	1	1	0
SPBC14C8.04|ilv6|II|acetolactate	SPBC14C8.04|ilv6|II|acetolactate	2	2	2	>SPBC14C8.04|ilv6|II|acetolactate synthase regulatory unit Ilv6 (predicted)	1	2	2	2	0	0	1	1	0	0	1	1	0	0	1	1	12.1	12.1	12.1	31.834	289	289	0	4.7479	By matching	By matching	By MS/MS	By MS/MS	0	0	5.9	6.2	1953600	0	0	0	1953600	0	0	0	1953600	0	0	1
SPBC14C8.06|arc1|II|ARP2/3	SPBC14C8.06|arc1|II|ARP2/3	2	2	2	>SPBC14C8.06|arc1|II|ARP2/3 actin-organizing complex subunit Sop2	1	2	2	2	1	1	2	2	1	1	2	2	1	1	2	2	4.8	4.8	4.8	41.596	377	377	0	8.3269	By MS/MS	By MS/MS	By MS/MS	By MS/MS	2.9	2.9	4.8	4.8	13383000	2759200	2420700	5196700	3006600	0	0	0	3006600	0	1	1
SPBC14C8.14c|pol5|II|DNA	SPBC14C8.14c|pol5|II|DNA	3	3	3	>SPBC14C8.14c|pol5|II|DNA polymerase phi	1	3	3	3	0	3	2	0	0	3	2	0	0	3	2	0	3.4	3.4	3.4	109.72	959	959	0	4.4672	By matching	By MS/MS	By MS/MS	By matching	0	3.4	2.6	0	7650800	0	3367500	4283300	0	0	2871100	3623500	0	0	2	1
SPBC14F5.03c|kap123|II|karyopherin	SPBC14F5.03c|kap123|II|karyopherin	9	9	9	>SPBC14F5.03c|kap123|II|karyopherin Kap123	1	9	9	9	7	6	5	7	7	6	5	7	7	6	5	7	12.7	12.7	12.7	117.83	1067	1067	0	34.359	By MS/MS	By MS/MS	By MS/MS	By MS/MS	10.4	7.4	6.9	9.7	120650000	26026000	31418000	20255000	42947000	23626000	31808000	18948000	34444000	6	6	5
SPBC14F5.04c|pgk1|II|phosphoglycerate	SPBC14F5.04c|pgk1|II|phosphoglycerate	34	34	34	>SPBC14F5.04c|pgk1|II|phosphoglycerate kinase Pgk1 (predicted)	1	34	34	34	31	31	32	25	31	31	32	25	31	31	32	25	79.5	79.5	79.5	43.963	414	414	0	323.31	By MS/MS	By MS/MS	By MS/MS	By MS/MS	71.3	72.7	73.4	55.6	6488800000	1904200000	1589700000	1786400000	1208400000	1476000000	1407300000	1351100000	1309800000	45	39	44
SPBC14F5.05c|sam1|II|S-adenosylmethionine	SPBC14F5.05c|sam1|II|S-adenosylmethionine	21	21	21	>SPBC14F5.05c|sam1|II|S-adenosylmethionine synthetase	1	21	21	21	19	18	18	13	19	18	18	13	19	18	18	13	79.8	79.8	79.8	41.831	382	382	0	272.89	By MS/MS	By MS/MS	By MS/MS	By MS/MS	76.2	67.5	74.6	49.7	1993800000	686870000	371140000	627480000	308320000	537120000	310050000	492990000	338310000	25	18	26
SPBC14F5.06|rli1|II|iron-sulfur	SPBC14F5.06|rli1|II|iron-sulfur	5	5	5	>SPBC14F5.06|rli1|II|iron-sulfur ATPase involved in ribosome biogenesis and translation Rli1 (predicted)	1	5	5	5	5	3	4	2	5	3	4	2	5	3	4	2	9.1	9.1	9.1	66.589	593	593	0	12.975	By MS/MS	By MS/MS	By MS/MS	By MS/MS	9.1	6.2	7.4	4.2	45768000	14808000	12506000	11717000	6737100	9753400	9936800	10237000	9753700	4	2	3
SPBC14F5.09c|ade8|II|adenylosuccinate	SPBC14F5.09c|ade8|II|adenylosuccinate	10	10	10	>SPBC14F5.09c|ade8|II|adenylosuccinate lyase Ade8	1	10	10	10	6	8	6	6	6	8	6	6	6	8	6	6	34.2	34.2	34.2	54.307	482	482	0	49.921	By MS/MS	By MS/MS	By MS/MS	By MS/MS	21.6	26.8	19.5	22.2	123200000	27215000	49156000	21640000	25185000	26265000	34172000	19906000	28376000	6	7	3
SPBC14F5.13c|pho8|II|vacuolar	SPBC14F5.13c|pho8|II|vacuolar	2	2	2	>SPBC14F5.13c|pho8|II|vacuolar membrane alkaline phosphatase (predicted)	1	2	2	2	2	2	2	1	2	2	2	1	2	2	2	1	5.1	5.1	5.1	58.666	532	532	0	5.7848	By MS/MS	By MS/MS	By MS/MS	By MS/MS	5.1	5.1	5.1	2.1	16000000	5364100	3794200	4465600	2375700	5003800	2919900	3549300	0	3	1	1
SPBC1539.03c|arg41|II|argininosuccinate;SPBC1773.14|arg7|II|argininosuccinate	SPBC1539.03c|arg41|II|argininosuccinate	4;1	4;1	4;1	>SPBC1539.03c|arg41|II|argininosuccinate lyase (predicted)	2	4	4	4	3	2	2	1	3	2	2	1	3	2	2	1	10.9	10.9	10.9	51.571	460	460;461	0	9.6594	By MS/MS	By MS/MS	By MS/MS	By matching	8.3	6.3	4.6	2.6	19054000	6062800	6112000	4130100	2749500	3222300	0	5232900	0	1	1	2
SPBC1539.04|tts1|II|tetra	SPBC1539.04|tts1|II|tetra	6	6	6	>SPBC1539.04|tts1|II|tetra spanning protein 1, Tts1	1	6	6	6	6	6	6	5	6	6	6	5	6	6	6	5	24	24	24	31.57	279	279	0	20.216	By MS/MS	By MS/MS	By MS/MS	By MS/MS	24	24	24	20.8	157930000	37998000	45465000	34955000	39514000	31383000	36189000	34243000	37986000	6	4	6
SPBC1539.05|cog3|II|Golgi	SPBC1539.05|cog3|II|Golgi	2	2	2	>SPBC1539.05|cog3|II|Golgi transport complex subunit Cog3 (predicted)	1	2	2	2	1	1	1	1	1	1	1	1	1	1	1	1	3.3	3.3	3.3	85.998	735	735	0	3.3555	By MS/MS	By matching	By MS/MS	By MS/MS	1.6	1.6	1.6	1.6	38843000	0	14788000	0	24054000	0	0	0	24054000	1	0	1
SPBC1539.07c|fmd1|II|glutathione-dependent	SPBC1539.07c|fmd1|II|glutathione-dependent	2	2	2	>SPBC1539.07c|fmd1|II|glutathione-dependent formaldehyde dehydrogenase (predicted)	1	2	2	2	1	2	1	1	1	2	1	1	1	2	1	1	6.3	6.3	6.3	40.444	378	378	0	8.7138	By MS/MS	By MS/MS	By MS/MS	By MS/MS	3.4	6.3	3.4	3.4	6161700	1641600	4520000	0	0	0	3955100	0	0	1	2	1
SPBC1539.09c|trp1|II|anthranilate	SPBC1539.09c|trp1|II|anthranilate	6	6	6	>SPBC1539.09c|trp1|II|anthranilate synthase component II, multifunctional enzyme Trp1	1	6	6	6	1	6	3	4	1	6	3	4	1	6	3	4	9.1	9.1	9.1	83.039	759	759	0	17.736	By MS/MS	By MS/MS	By MS/MS	By MS/MS	1.3	9.1	6.1	5.3	34330000	6305800	13275000	7867300	6881900	0	7125600	6879600	11009000	1	4	3
SPBC15C4.04c|SPBC15C4.04c|II|amino	SPBC15C4.04c|SPBC15C4.04c|II|amino	1	1	1	>SPBC15C4.04c|SPBC15C4.04c|II|amino acid transmembrane transporter (predicted)	1	1	1	1	1	0	1	0	1	0	1	0	1	0	1	0	2.6	2.6	2.6	59.726	542	542	0.0039154	2.4499	By MS/MS	By matching	By MS/MS	By matching	2.6	0	2.6	0	5563200	3057000	0	2506200	0	0	0	2076000	0	1	0	1
SPBC15D4.03|slm9|II|hira	SPBC15D4.03|slm9|II|hira	1	1	1	>SPBC15D4.03|slm9|II|hira protein Slm9	1	1	1	1	1	1	0	1	1	1	0	1	1	1	0	1	1.4	1.4	1.4	90.432	807	807	0	3.2148	By MS/MS	By MS/MS	By matching	By matching	1.4	1.4	0	1.4	4064900	1771900	0	0	2293000	0	0	0	2293000	1	1	0
SPBC15D4.04|gpt2|II|UDP-N-acetylglucosamine--dolichyl-phosphate	SPBC15D4.04|gpt2|II|UDP-N-acetylglucosamine--dolichyl-phosphate	1	1	1	>SPBC15D4.04|gpt2|II|UDP-N-acetylglucosamine--dolichyl-phosphate N-acetylglucosaminephosphotransferase	1	1	1	1	0	1	0	1	0	1	0	1	0	1	0	1	4.7	4.7	4.7	49.855	446	446	0	5.0946	By matching	By MS/MS	By matching	By MS/MS	0	4.7	0	4.7	9727400	0	5778900	0	3948500	0	0	0	3948500	0	1	0
SPBC15D4.14|taf73|II|transcription	SPBC15D4.14|taf73|II|transcription	4	4	4	>SPBC15D4.14|taf73|II|transcription factor TFIID complex subunit Taf5-like	1	4	4	4	1	3	3	3	1	3	3	3	1	3	3	3	7.3	7.3	7.3	72.25	642	642	0	10.132	By MS/MS	By MS/MS	By MS/MS	By MS/MS	1.7	4.4	5.9	5.9	19646000	2011400	7003800	4552700	6078200	0	6128400	0	0	1	3	2
SPBC15D4.15|pho2|II|4-nitrophenylphosphatase	SPBC15D4.15|pho2|II|4-nitrophenylphosphatase	3	3	3	>SPBC15D4.15|pho2|II|4-nitrophenylphosphatase	1	3	3	3	3	2	1	3	3	2	1	3	3	2	1	3	11.7	11.7	11.7	32.793	298	298	0	5.2851	By MS/MS	By MS/MS	By matching	By MS/MS	11.7	8.7	5	11.7	21434000	10434000	3276500	1495600	6227900	0	0	0	6227900	1	0	0
SPBC1604.03c|SPBC1604.03c|II|conserved	SPBC1604.03c|SPBC1604.03c|II|conserved	2	2	2	>SPBC1604.03c|SPBC1604.03c|II|conserved fungal protein	1	2	2	2	0	2	1	1	0	2	1	1	0	2	1	1	7.9	7.9	7.9	37.372	330	330	0	4.1697	By matching	By MS/MS	By matching	By MS/MS	0	7.9	3.9	3.9	5808700	0	2148100	1039900	2620800	0	0	0	2620800	0	1	0
SPBC1604.04|SPBC1604.04|II|mitochondrial	SPBC1604.04|SPBC1604.04|II|mitochondrial	3	3	3	>SPBC1604.04|SPBC1604.04|II|mitochondrial thiamine pyrophosphate transmembrane transporter (predicted)	1	3	3	3	3	1	1	2	3	1	1	2	3	1	1	2	11.3	11.3	11.3	31.025	283	283	0	13.213	By MS/MS	By MS/MS	By MS/MS	By MS/MS	11.3	2.5	2.5	6	7168000	2086600	1964500	1534000	1583000	0	0	0	1583000	3	1	1
SPBC1604.05|pgi1|II|glucose-6-phosphate	SPBC1604.05|pgi1|II|glucose-6-phosphate	23	23	23	>SPBC1604.05|pgi1|II|glucose-6-phosphate isomerase (predicted)	1	23	23	23	21	22	20	20	21	22	20	20	21	22	20	20	47.5	47.5	47.5	60.883	550	550	0	280.18	By MS/MS	By MS/MS	By MS/MS	By MS/MS	46.4	46.2	46.4	44	2489000000	510500000	848490000	483590000	646440000	398660000	739190000	382140000	679830000	24	33	21
SPBC1604.07|atp4|II|F0-ATPase	SPBC1604.07|atp4|II|F0-ATPase	4	4	4	>SPBC1604.07|atp4|II|F0-ATPase subunit (predicted)	1	4	4	4	3	1	2	1	3	1	2	1	3	1	2	1	21.3	21.3	21.3	26.7	244	244	0	7.89	By MS/MS	By matching	By MS/MS	By MS/MS	16.8	6.6	11.1	6.6	9962300	2592700	2478800	2776100	2114700	0	0	0	2114700	2	0	1
SPBC1604.11|atp17|II|F0-ATPase	SPBC1604.11|atp17|II|F0-ATPase	1	1	1	>SPBC1604.11|atp17|II|F0-ATPase subunit F (predicted)	1	1	1	1	1	1	0	0	1	1	0	0	1	1	0	0	11.5	11.5	11.5	10.872	96	96	0	4.0614	By matching	By MS/MS	By matching	By matching	11.5	11.5	0	0	5374200	2484600	2889700	0	0	0	2528500	0	0	0	1	0
SPBC1604.14c|shk1|II|PAK-related	SPBC1604.14c|shk1|II|PAK-related	4	4	4	>SPBC1604.14c|shk1|II|PAK-related kinase Shk1	1	4	4	4	4	3	2	3	4	3	2	3	4	3	2	3	12.3	12.3	12.3	72.357	658	658	0	12.37	By MS/MS	By MS/MS	By MS/MS	By MS/MS	12.3	7.8	5.9	10.5	51939000	16468000	10622000	9903500	14946000	9694800	10800000	12869000	12754000	5	3	2
SPBC1604.21c|ptr3|II|ubiquitin	SPBC1604.21c|ptr3|II|ubiquitin	13	13	13	>SPBC1604.21c|ptr3|II|ubiquitin activating enzyme E1	1	13	13	13	11	13	13	10	11	13	13	10	11	13	13	10	16.6	16.6	16.6	112.95	1012	1012	0	49.024	By MS/MS	By MS/MS	By MS/MS	By MS/MS	13.7	16.6	16.6	12.9	231590000	57925000	60330000	63736000	49600000	54807000	45805000	50502000	52168000	10	9	10
SPBC1652.02|SPBC1652.02|II|APC	SPBC1652.02|SPBC1652.02|II|APC	1	1	1	>SPBC1652.02|SPBC1652.02|II|APC amino acid transmembrane transporter (predicted)	1	1	1	1	0	0	1	0	0	0	1	0	0	0	1	0	1.9	1.9	1.9	65.277	594	594	0.0054012	2.3043	By matching	By matching	By MS/MS	By matching	0	0	1.9	0	1817100	0	0	1817100	0	0	0	1505100	0	0	0	1
SPBC1677.03c|tda1|II|threonine	SPBC1677.03c|tda1|II|threonine	2	2	2	>SPBC1677.03c|tda1|II|threonine ammonia-lyase Tda1	1	2	2	2	2	2	2	2	2	2	2	2	2	2	2	2	5	5	5	66.543	600	600	0	8.3217	By MS/MS	By MS/MS	By MS/MS	By MS/MS	5	5	5	5	34736000	7896600	10482000	8451500	7906100	6552100	9152900	6856000	8074600	1	2	1
SPBC1683.03c|SPBC1683.03c|II|transmembrane	SPBC1683.03c|SPBC1683.03c|II|transmembrane	1	1	1	>SPBC1683.03c|SPBC1683.03c|II|transmembrane transporter (predicted)	1	1	1	1	1	0	1	0	1	0	1	0	1	0	1	0	2.7	2.7	2.7	56.954	519	519	0	5.5275	By MS/MS	By matching	By MS/MS	By matching	2.7	0	2.7	0	2914400	2914400	0	0	0	2419900	0	0	0	0	0	1
SPBC1685.09|rps29|II|40S	SPBC1685.09|rps29|II|40S	2	2	2	>SPBC1685.09|rps29|II|40S ribosomal protein S29 (predicted)	1	2	2	2	2	1	2	1	2	1	2	1	2	1	2	1	37.5	37.5	37.5	6.6575	56	56	0	8.0281	By MS/MS	By MS/MS	By matching	By MS/MS	37.5	19.6	37.5	19.6	33176000	12884000	2862100	14986000	2444600	11260000	0	11850000	0	2	1	0
SPBC1685.10|rps27|II|40S	SPBC1685.10|rps27|II|40S	4	4	4	>SPBC1685.10|rps27|II|40S ribosomal protein S27 (predicted)	1	4	4	4	4	3	4	3	4	3	4	3	4	3	4	3	37.3	37.3	37.3	9.1718	83	83	0	11.879	By MS/MS	By MS/MS	By MS/MS	By MS/MS	37.3	36.1	37.3	28.9	164040000	48588000	25841000	44111000	45501000	33595000	0	29308000	39500000	4	3	4
SPBC1685.13|fhn1|II|plasma	SPBC1685.13|fhn1|II|plasma	1	1	1	>SPBC1685.13|fhn1|II|plasma membrane organization protein Fhn1	1	1	1	1	1	1	1	1	1	1	1	1	1	1	1	1	5.5	5.5	5.5	20.273	183	183	0	3.4851	By MS/MS	By MS/MS	By MS/MS	By MS/MS	5.5	5.5	5.5	5.5	52116000	12993000	13603000	16548000	8973100	0	0	0	8973100	1	1	1
SPBC1685.15c|klp6|II|kinesin-like	SPBC1685.15c|klp6|II|kinesin-like	2	2	2	>SPBC1685.15c|klp6|II|kinesin-like protein Klp6	1	2	2	2	1	1	1	1	1	1	1	1	1	1	1	1	2.9	2.9	2.9	87.795	784	784	0	5.0127	By matching	By MS/MS	By MS/MS	By matching	1.7	1.3	1.7	1.3	8147000	3028000	1685400	1858300	1575400	0	0	1539300	0	0	0	1
SPBC16A3.08c|oga1|II|Stm1	SPBC16A3.08c|oga1|II|Stm1	1	1	1	>SPBC16A3.08c|oga1|II|Stm1 homolog Oga1	1	1	1	1	1	1	0	1	1	1	0	1	1	1	0	1	4.2	4.2	4.2	30.949	284	284	0.0023828	2.5993	By matching	By MS/MS	By matching	By matching	4.2	4.2	0	4.2	5471000	2121500	1569000	0	1780500	0	0	0	1780500	0	1	0
SPBC16A3.12c|SPBC16A3.12c|II|triglyceride	SPBC16A3.12c|SPBC16A3.12c|II|triglyceride	4	4	4	>SPBC16A3.12c|SPBC16A3.12c|II|triglyceride lipase-cholesterol esterase (predicted)	1	4	4	4	4	4	4	4	4	4	4	4	4	4	4	4	10.4	10.4	10.4	51.547	443	443	0	14.056	By MS/MS	By MS/MS	By MS/MS	By MS/MS	10.4	10.4	10.4	10.4	91369000	17711000	23603000	24022000	26033000	18161000	19048000	20355000	23725000	3	4	5
SPBC16A3.13|meu7|II|alpha-amylase	SPBC16A3.13|meu7|II|alpha-amylase	2	2	2	>SPBC16A3.13|meu7|II|alpha-amylase homolog Aah4	1	2	2	2	1	1	2	1	1	1	2	1	1	1	2	1	4.4	4.4	4.4	89.458	774	774	0.0097744	2.1077	By MS/MS	By MS/MS	By MS/MS	By matching	3.2	3.2	4.4	3.2	374420000	94880000	104850000	111450000	63239000	0	0	78440000	0	1	1	1
SPBC16A3.15c|nda2|II|tubulin	SPBC16A3.15c|nda2|II|tubulin	5	2	2	>SPBC16A3.15c|nda2|II|tubulin alpha 1	1	5	2	2	4	5	5	5	2	2	2	2	2	2	2	2	14.7	6.6	6.6	51.152	455	455	0	10.408	By MS/MS	By MS/MS	By MS/MS	By MS/MS	12.7	14.7	14.7	14.7	62931000	16032000	18599000	15552000	12747000	13063000	17102000	13523000	11527000	1	2	2
SPBC16C6.07c|rpt1|II|19S	SPBC16C6.07c|rpt1|II|19S	5	5	5	>SPBC16C6.07c|rpt1|II|19S proteasome regulatory subunit Rpt1 (predicted)	1	5	5	5	3	2	1	3	3	2	1	3	3	2	1	3	14.6	14.6	14.6	48.965	438	438	0	10.601	By MS/MS	By MS/MS	By MS/MS	By MS/MS	9.1	4.6	1.8	7.3	32823000	18691000	4679200	3220200	6232600	0	4309100	0	6017900	1	1	0
SPBC16C6.09|ogm4|II|protein	SPBC16C6.09|ogm4|II|protein	13	13	13	>SPBC16C6.09|ogm4|II|protein O-mannosyltransferase Ogm4	1	13	13	13	12	12	11	10	12	12	11	10	12	12	11	10	19.5	19.5	19.5	90.09	778	778	0	60.657	By MS/MS	By MS/MS	By MS/MS	By MS/MS	19.5	17.7	17.1	16.6	348560000	90189000	96914000	84472000	76988000	65848000	82980000	69444000	87578000	10	11	7
SPBC16C6.11|rpl3201|II|60S;SPAC3H5.10|rpl3202|I|60S	SPBC16C6.11|rpl3201|II|60S;SPAC3H5.10|rpl3202|I|60S	2;1	2;1	2;1	>SPBC16C6.11|rpl3201|II|60S ribosomal protein L32;>SPAC3H5.10|rpl3202|I|60S ribosomal protein L32 (predicted)	2	2	2	2	2	2	2	2	2	2	2	2	2	2	2	2	20.5	20.5	20.5	14.445	127	127;127	0	8.466	By MS/MS	By MS/MS	By MS/MS	By MS/MS	20.5	20.5	20.5	20.5	73948000	15421000	20124000	22537000	15867000	13106000	13573000	15032000	10474000	2	3	3
SPBC16C6.13c|sec27|II|coatomer	SPBC16C6.13c|sec27|II|coatomer	15	15	15	>SPBC16C6.13c|sec27|II|coatomer beta subunit (predicted)	1	15	15	15	10	13	12	11	10	13	12	11	10	13	12	11	28.3	28.3	28.3	89.802	796	796	0	74.94	By MS/MS	By MS/MS	By MS/MS	By MS/MS	18.7	23.7	23.2	21.5	290640000	55739000	85113000	77114000	72675000	59768000	62454000	52420000	82667000	9	8	8
SPBC16D10.02|trm11|II|tRNA	SPBC16D10.02|trm11|II|tRNA	2	2	2	>SPBC16D10.02|trm11|II|tRNA (guanine-N2-)-methyltransferase catalytic subunit Trm11 (predicted)	1	2	2	2	1	2	0	2	1	2	0	2	1	2	0	2	4.5	4.5	4.5	53.589	469	469	0.00080906	2.8684	By matching	By MS/MS	By matching	By MS/MS	2.3	4.5	0	4.5	7685500	2219500	1897900	0	3568100	0	0	0	3568100	0	2	0
SPBC16D10.06|zrt1|II|ZIP	SPBC16D10.06|zrt1|II|ZIP	6	6	6	>SPBC16D10.06|zrt1|II|ZIP zinc transmembrane transporter Zrt1	1	6	6	6	6	5	6	4	6	5	6	4	6	5	6	4	25.7	25.7	25.7	45.271	408	408	0	49.951	By MS/MS	By MS/MS	By MS/MS	By MS/MS	25.7	21.1	25.7	14.7	303430000	71101000	64726000	104260000	63345000	50696000	52751000	71804000	63338000	10	7	10
SPBC16D10.08c|hsp104|II|heat	SPBC16D10.08c|hsp104|II|heat	11	11	11	>SPBC16D10.08c|hsp104|II|heat shock protein Hsp104	1	11	11	11	9	9	9	7	9	9	9	7	9	9	9	7	14.8	14.8	14.8	100.51	905	905	0	45.7	By MS/MS	By MS/MS	By MS/MS	By MS/MS	11.8	12.7	11.8	9.8	91645000	27822000	21862000	26813000	15149000	19822000	19414000	20876000	19477000	7	4	7
SPCC1259.01c|rps1802|III|40S;SPBC16D10.11c|rps1801|II|40S	SPCC1259.01c|rps1802|III|40S;SPBC16D10.11c|rps1801|II|40S	5;5	5;5	5;5	>SPCC1259.01c|rps1802|III|40S ribosomal protein S18 (predicted);>SPBC16D10.11c|rps1801|II|40S ribosomal protein S18 (predicted)	2	5	5	5	5	3	5	3	5	3	5	3	5	3	5	3	34.9	34.9	34.9	17.435	152	152;152	0	30.344	By MS/MS	By MS/MS	By MS/MS	By MS/MS	34.9	21.7	34.9	21.7	345770000	106350000	83725000	88521000	67173000	79860000	80857000	66312000	75035000	5	3	5
SPBC16E9.05|erg6|II|sterol	SPBC16E9.05|erg6|II|sterol	6	6	6	>SPBC16E9.05|erg6|II|sterol 24-C-methyltransferase Erg6	1	6	6	6	4	2	3	3	4	2	3	3	4	2	3	3	22.5	22.5	22.5	42.867	378	378	0	18.009	By MS/MS	By MS/MS	By MS/MS	By MS/MS	10.8	5.6	7.7	12.4	43822000	19026000	3384900	8407300	13003000	12818000	4933800	15794000	5181700	4	2	3
SPBC16E9.09c|erp5|II|COPII	SPBC16E9.09c|erp5|II|COPII	2	2	2	>SPBC16E9.09c|erp5|II|COPII vesicle coat component Erp5/Erp6 (predicted)	1	2	2	2	1	1	1	1	1	1	1	1	1	1	1	1	12.6	12.6	12.6	24.845	215	215	0	7.2637	By MS/MS	By MS/MS	By matching	By matching	5.6	7	7	7	17876000	3505900	3805900	5213100	5351100	0	0	0	5351100	1	1	0
SPBC16E9.14c|zrg17|II|cation	SPBC16E9.14c|zrg17|II|cation	4	4	4	>SPBC16E9.14c|zrg17|II|cation diffusion family zinc transmembrane transporter Zrg17	1	4	4	4	3	2	4	4	3	2	4	4	3	2	4	4	13	13	13	43.089	386	386	0	15.044	By MS/MS	By MS/MS	By MS/MS	By MS/MS	9.1	6	13	13	52018000	12030000	5991100	19100000	14897000	13473000	6392500	12535000	13549000	2	2	3
SPBC16G5.01|rpn12|II|19S	SPBC16G5.01|rpn12|II|19S	2	2	2	>SPBC16G5.01|rpn12|II|19S proteasome regulatory subunit Rpn12	1	2	2	2	1	1	2	1	1	1	2	1	1	1	2	1	9.6	9.6	9.6	30.899	270	270	0	6.5684	By MS/MS	By MS/MS	By MS/MS	By MS/MS	6.7	6.7	9.6	6.7	27746000	10039000	6692600	5586700	5427500	0	0	4627700	0	1	1	2
SPBC16G5.05c|scs2|II|VAP	SPBC16G5.05c|scs2|II|VAP	2	2	2	>SPBC16G5.05c|scs2|II|VAP family protein Scs2	1	2	2	2	1	1	2	2	1	1	2	2	1	1	2	2	8.6	8.6	8.6	41.234	383	383	0	12.032	By MS/MS	By MS/MS	By MS/MS	By MS/MS	4.2	4.2	8.6	8.6	86674000	17268000	16468000	29364000	23574000	0	0	24783000	23115000	1	1	3
SPBC16G5.14c|rps3|II|40S	SPBC16G5.14c|rps3|II|40S	11	11	11	>SPBC16G5.14c|rps3|II|40S ribosomal protein S3 (predicted)	1	11	11	11	10	10	9	7	10	10	9	7	10	10	9	7	51.8	51.8	51.8	27.553	249	249	0	68.733	By MS/MS	By MS/MS	By MS/MS	By MS/MS	45	46.6	42.2	36.5	559280000	168420000	132800000	163860000	94199000	143080000	80330000	144900000	73600000	12	11	11
SPBC16G5.18|erg24|II|C-14	SPBC16G5.18|erg24|II|C-14	1	1	1	>SPBC16G5.18|erg24|II|C-14 sterol reductase Erg24 (predicted)	1	1	1	1	0	1	1	1	0	1	1	1	0	1	1	1	3.1	3.1	3.1	48.56	424	424	0.00080972	2.8766	By matching	By MS/MS	By MS/MS	By MS/MS	0	3.1	3.1	3.1	6191500	0	2797800	3393700	0	0	0	2811100	0	0	1	1
SPBC16H5.02|pfk1|II|6-phosphofructokinase	SPBC16H5.02|pfk1|II|6-phosphofructokinase	43	43	43	>SPBC16H5.02|pfk1|II|6-phosphofructokinase pfk1	1	43	43	43	37	40	37	35	37	40	37	35	37	40	37	35	58.5	58.5	58.5	102.55	942	942	0	323.31	By MS/MS	By MS/MS	By MS/MS	By MS/MS	54.4	56.4	53.7	45.9	5378100000	1311200000	1542100000	1286500000	1238300000	965250000	1276500000	1009600000	1279500000	52	56	47
SPBC16H5.04|SPBC16H5.04|II|pho88	SPBC16H5.04|SPBC16H5.04|II|pho88	1	1	1	>SPBC16H5.04|SPBC16H5.04|II|pho88 family protein (predicted)	1	1	1	1	1	1	1	1	1	1	1	1	1	1	1	1	8.8	8.8	8.8	21.964	194	194	0	11.896	By MS/MS	By MS/MS	By MS/MS	By MS/MS	8.8	8.8	8.8	8.8	33771000	10710000	9769000	6865200	6426100	0	0	0	6426100	0	1	0
SPBC16H5.07c|ppa2|II|serine/threonine	SPBC16H5.07c|ppa2|II|serine/threonine	1	1	1	>SPBC16H5.07c|ppa2|II|serine/threonine protein phosphatase Ppa2	1	1	1	1	0	1	1	1	0	1	1	1	0	1	1	1	5.9	5.9	5.9	36.489	322	322	0	3.8945	By matching	By MS/MS	By matching	By matching	0	5.9	5.9	5.9	5656500	0	1695100	2191600	1769800	0	0	0	1769800	0	1	0
SPBC16H5.08c|SPBC16H5.08c|II|ribosome	SPBC16H5.08c|SPBC16H5.08c|II|ribosome	10	10	10	>SPBC16H5.08c|SPBC16H5.08c|II|ribosome biogenesis ATPase, Arb family ABCF2-like (predicted)	1	10	10	10	6	8	6	7	6	8	6	7	6	8	6	7	20.6	20.6	20.6	69.212	618	618	0	48.673	By MS/MS	By MS/MS	By MS/MS	By MS/MS	15.4	17.6	10	16	190230000	35649000	54975000	43251000	56356000	34619000	42051000	46717000	46499000	5	8	6
SPBC16H5.11c|skb1|II|type	SPBC16H5.11c|skb1|II|type	4	4	4	>SPBC16H5.11c|skb1|II|type II protein arginine N-methyltransferase Skb1	1	4	4	4	2	3	1	1	2	3	1	1	2	3	1	1	7.3	7.3	7.3	73.166	645	645	0	9.6366	By MS/MS	By MS/MS	By MS/MS	By MS/MS	2.6	5.9	1.2	1.2	19527000	2223000	12345000	2679500	2279800	0	10802000	0	0	3	0	0
SPBC16H5.12c|SPBC16H5.12c|II|conserved	SPBC16H5.12c|SPBC16H5.12c|II|conserved	2	2	2	>SPBC16H5.12c|SPBC16H5.12c|II|conserved fungal protein	1	2	2	2	1	0	1	1	1	0	1	1	1	0	1	1	3	3	3	82.52	737	737	0	5.181	By MS/MS	By matching	By MS/MS	By MS/MS	1.4	0	1.6	1.4	6326800	0	0	4470800	1856000	0	0	3703300	0	1	0	1
SPBC1703.02|rsc9|II|RSC	SPBC1703.02|rsc9|II|RSC	4	4	4	>SPBC1703.02|rsc9|II|RSC complex subunit Rsc9	1	4	4	4	1	2	2	4	1	2	2	4	1	2	2	4	8.7	8.7	8.7	87.994	780	780	0	12.146	By MS/MS	By MS/MS	By matching	By MS/MS	1.4	3.5	3.5	8.7	25137000	3627900	5878100	6104700	9526600	0	6091600	6035500	7599600	1	1	0
SPBC1703.07|acl1|II|ATP	SPBC1703.07|acl1|II|ATP	18	18	18	>SPBC1703.07|acl1|II|ATP citrate synthase subunit 1 (predicted)	1	18	18	18	15	17	14	14	15	17	14	14	15	17	14	14	38.2	38.2	38.2	67.203	615	615	0	180.18	By MS/MS	By MS/MS	By MS/MS	By MS/MS	31.1	38	29.6	26.5	510880000	134120000	175560000	109750000	91448000	100110000	130800000	96110000	120310000	13	15	7
SPBC1703.10|ypt1|II|GTPase	SPBC1703.10|ypt1|II|GTPase	4	4	4	>SPBC1703.10|ypt1|II|GTPase Ypt1	1	4	4	4	3	3	3	2	3	3	3	2	3	3	3	2	19.7	19.7	19.7	22.816	203	203	0	18.838	By MS/MS	By MS/MS	By MS/MS	By MS/MS	15.8	15.8	15.8	11.8	48390000	14226000	10405000	15309000	8451000	12495000	6124200	14547000	8881400	3	1	3
SPBC1703.13c|SPBC1703.13c|II|mitochondrial	SPBC1703.13c|SPBC1703.13c|II|mitochondrial	9	9	9	>SPBC1703.13c|SPBC1703.13c|II|mitochondrial inorganic phosphate transmembrane transporter (predicted)	1	9	9	9	9	9	9	9	9	9	9	9	9	9	9	9	29.6	29.6	29.6	33.843	311	311	0	106.2	By MS/MS	By MS/MS	By MS/MS	By MS/MS	29.6	29.6	29.6	29.6	971620000	233450000	263430000	231390000	243350000	187660000	229140000	206460000	236090000	8	9	7
SPBC1703.15c|vps33|II|HOPS/CORVET	SPBC1703.15c|vps33|II|HOPS/CORVET	1	1	1	>SPBC1703.15c|vps33|II|HOPS/CORVET complex subunit, vacuolar sorting protein Vps33	1	1	1	1	0	0	1	0	0	0	1	0	0	0	1	0	1.7	1.7	1.7	67.599	592	592	0.0039216	2.4648	By matching	By matching	By MS/MS	By matching	0	0	1.7	0	2490000	0	0	2490000	0	0	0	2062500	0	0	0	1
SPBC1706.03|fzo1|II|mitochondrial	SPBC1706.03|fzo1|II|mitochondrial	3	3	3	>SPBC1706.03|fzo1|II|mitochondrial dynamin family fusion GTPase protein (predicted)	1	3	3	3	1	2	3	2	1	2	3	2	1	2	3	2	5	5	5	87.101	758	758	0	7.6316	By MS/MS	By MS/MS	By MS/MS	By MS/MS	1.6	3.6	5	3.6	27436000	3556900	6738800	10590000	6550500	0	6913200	7045100	7260500	1	2	2
SPBC1709.02c|vrs1|II|cytoplasmic	SPBC1709.02c|vrs1|II|cytoplasmic	23	23	23	>SPBC1709.02c|vrs1|II|cytoplasmic valine-tRNA ligase Vrs1/Vas1	1	23	23	23	18	17	21	12	18	17	21	12	18	17	21	12	31.9	31.9	31.9	111.32	980	980	0	107.1	By MS/MS	By MS/MS	By MS/MS	By MS/MS	23.6	24.7	27.6	17.1	491420000	100150000	144140000	150330000	96794000	91891000	122430000	95919000	120370000	13	19	19
SPBC1709.05|sks2|II|heat	SPBC1709.05|sks2|II|heat	32	32	32	>SPBC1709.05|sks2|II|heat shock protein, ribosome associated molecular chaperone Sks2	1	32	32	32	29	26	29	27	29	26	29	27	29	26	29	27	66.4	66.4	66.4	67.205	613	613	0	323.31	By MS/MS	By MS/MS	By MS/MS	By MS/MS	63	58.1	63.1	63.3	9838900000	3101400000	2375900000	2241200000	2120400000	2353100000	1951600000	1725300000	2122100000	54	48	47
SPBC1709.08|cft1|II|cleavage	SPBC1709.08|cft1|II|cleavage	6	6	6	>SPBC1709.08|cft1|II|cleavage factor one Cft1 (predicted)	1	6	6	6	2	4	3	4	2	4	3	4	2	4	3	4	5.3	5.3	5.3	160.3	1441	1441	0	15.321	By MS/MS	By MS/MS	By MS/MS	By MS/MS	2	3.1	2.7	3.3	25483000	3801400	9667000	3023700	8990800	0	6019500	4791800	9143000	1	2	2
SPBC1709.15c|cft2|II|cleavage	SPBC1709.15c|cft2|II|cleavage	1	1	1	>SPBC1709.15c|cft2|II|cleavage factor two Cft2/polyadenylation factor CPSF-73 (predicted)	1	1	1	1	1	1	1	1	1	1	1	1	1	1	1	1	1.3	1.3	1.3	89.45	797	797	0.0076278	2.2278	By MS/MS	By MS/MS	By MS/MS	By MS/MS	1.3	1.3	1.3	1.3	7604400	2221400	2195200	1793000	1394700	0	0	0	1394700	1	1	1
SPBC1711.04|mtd1|II|methylenetetrahydrofolate	SPBC1711.04|mtd1|II|methylenetetrahydrofolate	2	2	2	>SPBC1711.04|mtd1|II|methylenetetrahydrofolate reductase Mtd1 (predicted)	1	2	2	2	1	2	0	2	1	2	0	2	1	2	0	2	9.7	9.7	9.7	35.814	320	320	0	4.2034	By MS/MS	By MS/MS	By matching	By MS/MS	5.6	9.7	0	9.7	15751000	2595500	6417400	0	6737900	0	0	0	6737900	0	0	0
SPBC1711.05|SPBC1711.05|II|nucleocytoplasmic	SPBC1711.05|SPBC1711.05|II|nucleocytoplasmic	5	5	5	>SPBC1711.05|SPBC1711.05|II|nucleocytoplasmic transport chaperone Srp40 (predicted)	1	5	5	5	5	5	5	3	5	5	5	3	5	5	5	3	15.3	15.3	15.3	47.427	451	451	0	14.905	By MS/MS	By MS/MS	By MS/MS	By MS/MS	15.3	15.3	15.3	8.2	148550000	40721000	39101000	40452000	28276000	31545000	35847000	30362000	32055000	3	4	4
SPBC1711.06|rpl401|II|60S	SPBC1711.06|rpl401|II|60S	7	2	2	>SPBC1711.06|rpl401|II|60S ribosomal protein L4 (predicted)	1	7	2	2	6	7	6	5	1	2	1	0	1	2	1	0	24.8	7.4	7.4	39.91	363	363	0	3.5058	By matching	By MS/MS	By matching	By matching	22.6	24.8	22.6	17.4	8241600	2846700	2335900	3059000	0	0	0	2533900	0	0	1	0
SPBC1711.08|aha1|II|chaperone	SPBC1711.08|aha1|II|chaperone	2	2	2	>SPBC1711.08|aha1|II|chaperone activator Aha1 (predicted)	1	2	2	2	1	2	2	2	1	2	2	2	1	2	2	2	9.5	9.5	9.5	37.419	336	336	0	7.6954	By MS/MS	By MS/MS	By matching	By MS/MS	6.8	9.5	9.5	9.5	29731000	6211800	8998700	6784300	7736200	0	6927400	6660500	7642000	1	1	0
SPBC1711.12|ppp16|II|serine-type	SPBC1711.12|ppp16|II|serine-type	5	5	5	>SPBC1711.12|ppp16|II|serine-type peptidase activity	1	5	5	5	3	3	3	3	3	3	3	3	3	3	3	3	8.9	8.9	8.9	77.765	683	683	0	10.7	By MS/MS	By MS/MS	By MS/MS	By MS/MS	5.7	5.7	5.3	5.4	25811000	7264000	7956700	3537500	7052500	5295400	7698300	0	0	1	3	1
SPBC1711.13|his2|II|histidinol	SPBC1711.13|his2|II|histidinol	18	18	18	>SPBC1711.13|his2|II|histidinol dehydrogenase His2 (predicted)	1	18	18	18	18	15	16	13	18	15	16	13	18	15	16	13	48.1	48.1	48.1	47.553	439	439	0	178.2	By MS/MS	By MS/MS	By MS/MS	By MS/MS	48.1	37.4	41.5	34.2	1576300000	537670000	449580000	349600000	239470000	427170000	359520000	290020000	269060000	20	20	17
SPBC1718.04|SPBC1718.04|II|glycerol-3-phosphate	SPBC1718.04|SPBC1718.04|II|glycerol-3-phosphate	3	3	3	>SPBC1718.04|SPBC1718.04|II|glycerol-3-phosphate O-acyltransferase (predicted)	1	3	3	3	2	2	2	3	2	2	2	3	2	2	2	3	6.5	6.5	6.5	76.627	675	675	0	9.8001	By MS/MS	By MS/MS	By matching	By MS/MS	3.3	3.3	4.6	6.5	16481000	3118100	4129900	5820100	3413300	0	4828100	0	2198900	2	2	0
SPBC1734.04|anp1|II|mannosyltransferase	SPBC1734.04|anp1|II|mannosyltransferase	3	3	3	>SPBC1734.04|anp1|II|mannosyltransferase complex subunit, Anp family (predicted)	1	3	3	3	3	3	3	3	3	3	3	3	3	3	3	3	7.4	7.4	7.4	48.99	430	430	0	10.094	By MS/MS	By MS/MS	By MS/MS	By MS/MS	7.4	7.4	7.4	7.4	55891000	16101000	14000000	12322000	13468000	12572000	12202000	8979200	15540000	3	3	3
SPBC1734.08|hse1|II|STAM	SPBC1734.08|hse1|II|STAM	2	2	2	>SPBC1734.08|hse1|II|STAM like protein Hse1	1	2	2	2	2	1	1	0	2	1	1	0	2	1	1	0	6.2	6.2	6.2	42.497	373	373	0	9.2224	By MS/MS	By MS/MS	By MS/MS	By matching	6.2	3.5	2.7	0	7960400	6643100	0	1317200	0	5516000	0	0	0	3	1	1
SPBC1734.11|mas5|II|DNAJ	SPBC1734.11|mas5|II|DNAJ	11	11	11	>SPBC1734.11|mas5|II|DNAJ domain protein Mas5 (predicted)	1	11	11	11	9	9	10	8	9	9	10	8	9	9	10	8	33.4	33.4	33.4	44.821	407	407	0	104.04	By MS/MS	By MS/MS	By MS/MS	By MS/MS	31.7	30.7	31.7	26.5	793510000	202350000	218860000	178390000	193910000	164610000	193930000	154780000	186190000	8	8	10
SPBC1734.16c|pst3|II|SIN3	SPBC1734.16c|pst3|II|SIN3	3	3	3	>SPBC1734.16c|pst3|II|SIN3 family co-repressor Pst3	1	3	3	3	2	1	2	3	2	1	2	3	2	1	2	3	2.9	2.9	2.9	132.88	1154	1154	0	12.612	By MS/MS	By matching	By MS/MS	By MS/MS	1.9	0.8	1.9	2.9	16124000	6690800	2369600	5136100	1927900	5604500	0	4205500	0	2	0	1
SPBC1773.01|far8|II|SIP/FAR	SPBC1773.01|far8|II|SIP/FAR	5	5	5	>SPBC1773.01|far8|II|SIP/FAR complex striatin subunit, Far8/Csc3	1	5	5	5	5	4	5	1	5	4	5	1	5	4	5	1	11.3	11.3	11.3	69.494	612	612	0	14.488	By MS/MS	By MS/MS	By MS/MS	By MS/MS	11.3	9.2	11.3	2.8	34557000	11334000	9867200	11820000	1536600	8805000	9044000	9986400	0	2	3	2
SPBC1773.04|SPBC1773.04|II|methylglyoxyl	SPBC1773.04|SPBC1773.04|II|methylglyoxyl	2	2	2	>SPBC1773.04|SPBC1773.04|II|methylglyoxyl reductase (NADPH-dependent) (predicted)	1	2	2	2	2	1	1	1	2	1	1	1	2	1	1	1	5.4	5.4	5.4	37.806	336	336	0	5.1985	By MS/MS	By MS/MS	By MS/MS	By MS/MS	5.4	2.4	2.4	2.4	9929300	2525400	2866000	2084400	2453500	0	0	0	2453500	2	1	1
SPBC1773.09c|mug184|II|Hsp70	SPBC1773.09c|mug184|II|Hsp70	4	4	4	>SPBC1773.09c|mug184|II|Hsp70 protein binding protein Mug184	1	4	4	4	1	3	1	2	1	3	1	2	1	3	1	2	12.5	12.5	12.5	63.757	551	551	0	12.59	By matching	By MS/MS	By MS/MS	By MS/MS	3.4	9.1	4.7	6	23768000	5201000	7972500	4068600	6525800	0	6976000	0	0	0	3	2
SPBC1773.10c|nrs1|II|cytoplasmic	SPBC1773.10c|nrs1|II|cytoplasmic	14	14	14	>SPBC1773.10c|nrs1|II|cytoplasmic asparagine-tRNA ligase Nrs1 (predicted)	1	14	14	14	10	10	11	7	10	10	11	7	10	10	11	7	30.8	30.8	30.8	63.869	568	568	0	113.49	By MS/MS	By MS/MS	By MS/MS	By MS/MS	25.7	24.8	21.3	17.1	264960000	66508000	89348000	57002000	52099000	50634000	69830000	51250000	61005000	8	8	10
SPBC1778.01c|zuo1|II|zuotin	SPBC1778.01c|zuo1|II|zuotin	3	3	3	>SPBC1778.01c|zuo1|II|zuotin (predicted)	1	3	3	3	3	2	1	2	3	2	1	2	3	2	1	2	8.1	8.1	8.1	50.209	442	442	0	7.4862	By MS/MS	By MS/MS	By matching	By MS/MS	8.1	5.9	2.3	5.9	30247000	11425000	10227000	3140100	5455700	9486300	0	0	0	1	1	0
SPBC1778.06c|fim1|II|fimbrin	SPBC1778.06c|fim1|II|fimbrin	6	6	6	>SPBC1778.06c|fim1|II|fimbrin	1	6	6	6	3	2	6	2	3	2	6	2	3	2	6	2	10.9	10.9	10.9	68.617	614	614	0	28.679	By MS/MS	By MS/MS	By MS/MS	By MS/MS	5.4	5.2	10.9	3.6	51001000	14972000	4666400	24094000	7268800	12022000	11905000	11650000	0	3	2	4
SPBC17A3.04c|rar1|II|cytoplasmic	SPBC17A3.04c|rar1|II|cytoplasmic	22	22	22	>SPBC17A3.04c|rar1|II|cytoplasmic methionine-tRNA ligase Mrs1 (predicted)	1	22	22	22	16	21	18	18	16	21	18	18	16	21	18	18	40.3	40.3	40.3	88.88	782	782	0	209.55	By MS/MS	By MS/MS	By MS/MS	By MS/MS	27.7	38.4	33	31.1	869590000	190740000	295250000	180620000	202990000	172200000	215660000	166460000	207130000	14	24	17
SPBC17A3.05c|SPBC17A3.05c|II|DNAJ/DUF1977	SPBC17A3.05c|SPBC17A3.05c|II|DNAJ/DUF1977	1	1	1	>SPBC17A3.05c|SPBC17A3.05c|II|DNAJ/DUF1977 DNAJB12 homolog (predicted)	1	1	1	1	1	1	1	1	1	1	1	1	1	1	1	1	2.7	2.7	2.7	46.399	403	403	0	3.3822	By MS/MS	By MS/MS	By matching	By MS/MS	2.7	2.7	2.7	2.7	13063000	2800700	2759600	3979800	3522600	0	0	0	3522600	1	1	0
SPBC17D11.05|tif32|II|translation	SPBC17D11.05|tif32|II|translation	24	24	24	>SPBC17D11.05|tif32|II|translation initiation factor eIF3a	1	24	24	24	23	20	21	17	23	20	21	17	23	20	21	17	32.4	32.4	32.4	107.07	932	932	0	113.02	By MS/MS	By MS/MS	By MS/MS	By MS/MS	31.1	28.1	29.5	22.5	769920000	215690000	194120000	203620000	156490000	167530000	163750000	167950000	174880000	23	20	21
SPBC17D11.06|spp2|II|DNA	SPBC17D11.06|spp2|II|DNA	1	1	1	>SPBC17D11.06|spp2|II|DNA primase large subunit Spp2	1	1	1	1	0	1	0	1	0	1	0	1	0	1	0	1	3.5	3.5	3.5	53.053	459	459	0.0023622	2.5328	By matching	By matching	By matching	By MS/MS	0	3.5	0	3.5	6377100	0	1134300	0	5242800	0	0	0	5242800	0	0	0
SPBC17D11.07c|rpn2|II|19S	SPBC17D11.07c|rpn2|II|19S	12	12	12	>SPBC17D11.07c|rpn2|II|19S proteasome regulatory subunit Rpn2 (predicted)	1	12	12	12	10	7	9	7	10	7	9	7	10	7	9	7	15.8	15.8	15.8	107.28	965	965	0	46.428	By MS/MS	By MS/MS	By MS/MS	By MS/MS	13	8.8	12.1	8.6	145800000	51089000	29761000	40868000	24084000	26481000	30899000	31205000	37812000	7	5	6
SPBC17F3.02|nak1|II|PAK-related	SPBC17F3.02|nak1|II|PAK-related	3	3	3	>SPBC17F3.02|nak1|II|PAK-related kinase Nak1	1	3	3	3	2	2	2	1	2	2	2	1	2	2	2	1	5.8	5.8	5.8	71.119	652	652	0	10.244	By MS/MS	By MS/MS	By MS/MS	By MS/MS	3.4	3.4	4	1.8	13301000	4586900	3318200	3933900	1461400	0	2903500	0	0	2	1	2
SPBC17G9.02c|cdc73|II|RNA	SPBC17G9.02c|cdc73|II|RNA	3	3	3	>SPBC17G9.02c|cdc73|II|RNA polymerase II accessory factor, Cdc73 family (predicted)	1	3	3	3	1	1	1	2	1	1	1	2	1	1	1	2	11.1	11.1	11.1	42.629	371	371	0	12.663	By MS/MS	By MS/MS	By matching	By MS/MS	2.7	5.7	2.7	8.4	23295000	1690000	11405000	1475600	8725200	0	0	0	8725200	0	1	0
SPBC17G9.03c|krs1|II|cytoplasmic	SPBC17G9.03c|krs1|II|cytoplasmic	13	13	13	>SPBC17G9.03c|krs1|II|cytoplasmic lysine-tRNA ligase Krs1 (predicted)	1	13	13	13	11	7	12	4	11	7	12	4	11	7	12	4	23.2	23.2	23.2	67.493	591	591	0	56.644	By MS/MS	By MS/MS	By MS/MS	By MS/MS	19.6	13.5	21.5	7.1	154490000	50168000	41844000	41450000	21033000	31886000	35666000	32988000	33097000	7	6	10
SPBC17G9.06c|SPBC17G9.06c|II|siderophore-iron	SPBC17G9.06c|SPBC17G9.06c|II|siderophore-iron	12	12	12	>SPBC17G9.06c|SPBC17G9.06c|II|siderophore-iron biosynthesis protein (predicted)	1	12	12	12	8	11	10	9	8	11	10	9	8	11	10	9	45.2	45.2	45.2	39.775	334	334	0	92.473	By MS/MS	By MS/MS	By MS/MS	By MS/MS	34.7	39.2	41.3	37.4	397450000	90385000	117480000	97424000	92165000	71137000	88889000	72593000	97133000	10	12	10
SPBC17G9.07|rps2402|II|40S	SPBC17G9.07|rps2402|II|40S	1	1	1	>SPBC17G9.07|rps2402|II|40S ribosomal protein S24 (predicted)	1	1	1	1	1	1	1	0	1	1	1	0	1	1	1	0	9	9	9	15.539	134	134	0.0038971	2.421	By MS/MS	By MS/MS	By matching	By matching	9	9	9	0	7157800	3683200	0	3474600	0	0	0	2878100	0	1	1	0
SPBC17G9.08c|cnt5|II|Centaurin	SPBC17G9.08c|cnt5|II|Centaurin	6	6	6	>SPBC17G9.08c|cnt5|II|Centaurin Cnt5	1	6	6	6	4	4	3	3	4	4	3	3	4	4	3	3	8.4	8.4	8.4	99.081	870	870	0	17.822	By MS/MS	By MS/MS	By MS/MS	By MS/MS	6.1	5.9	3.6	4.5	39397000	13289000	8254900	9311900	8541900	7426800	7998000	8530600	10557000	4	3	2
SPBC17G9.09|tif213|II|translation	SPBC17G9.09|tif213|II|translation	9	9	9	>SPBC17G9.09|tif213|II|translation initiation factor eIF2 gamma subunit	1	9	9	9	6	7	8	7	6	7	8	7	6	7	8	7	27.8	27.8	27.8	48.78	446	446	0	50.41	By MS/MS	By MS/MS	By MS/MS	By MS/MS	21.5	23.1	26.2	23.5	147440000	36383000	45610000	28435000	37015000	28225000	37534000	31361000	33568000	5	6	7
SPBC17G9.11c|pyr1|II|pyruvate	SPBC17G9.11c|pyr1|II|pyruvate	70	70	70	>SPBC17G9.11c|pyr1|II|pyruvate carboxylase Pyr1	1	70	70	70	67	67	63	60	67	67	63	60	67	67	63	60	67.2	67.2	67.2	130.86	1185	1185	0	323.31	By MS/MS	By MS/MS	By MS/MS	By MS/MS	64.8	65.1	63.4	60.5	24346000000	5859100000	9092900000	3670000000	5724200000	4020600000	7226100000	2559100000	5259000000	112	136	92
SPBC1815.01|eno101|II|enolase	SPBC1815.01|eno101|II|enolase	23	23	23	>SPBC1815.01|eno101|II|enolase (predicted)	1	23	23	23	23	23	22	22	23	23	22	22	23	23	22	22	67.4	67.4	67.4	47.435	439	439	0	323.31	By MS/MS	By MS/MS	By MS/MS	By MS/MS	67.4	67.4	63.3	65.4	7261900000	1955000000	1911000000	1758300000	1637500000	1541200000	1662700000	1355100000	1594300000	40	42	36
SPBC1861.03|mak10|II|NatC	SPBC1861.03|mak10|II|NatC	3	3	3	>SPBC1861.03|mak10|II|NatC N-acetyltransferase complex subunit Mak10 (predicted)	1	3	3	3	1	2	1	3	1	2	1	3	1	2	1	3	4.7	4.7	4.7	80.455	708	708	0	6.0231	By MS/MS	By MS/MS	By MS/MS	By MS/MS	2	3.2	2	4.7	19088000	2659900	5721900	2333200	8373100	0	6962100	0	6417700	1	1	1
SPBC18E5.01|SPBC18E5.01|II|cycloisomerase	SPBC18E5.01|SPBC18E5.01|II|cycloisomerase	11	11	11	>SPBC18E5.01|SPBC18E5.01|II|cycloisomerase 2 family	1	11	11	11	8	8	6	8	8	8	6	8	8	8	6	8	48.8	48.8	48.8	38.22	342	342	0	160.81	By MS/MS	By MS/MS	By MS/MS	By MS/MS	35.7	37.1	35.7	39.2	648480000	151110000	163700000	144250000	189430000	119380000	133660000	119920000	140080000	7	7	4
SPBC18E5.02c|lcb1|II|serine	SPBC18E5.02c|lcb1|II|serine	4	4	4	>SPBC18E5.02c|lcb1|II|serine palmitoyltransferase complex subunit (predicted)	1	4	4	4	4	3	2	2	4	3	2	2	4	3	2	2	9.6	9.6	9.6	57.468	509	509	0	20.868	By MS/MS	By MS/MS	By MS/MS	By MS/MS	9.6	6.5	4.1	4.3	42438000	12910000	13404000	8020400	8103900	8927500	9687300	8402400	10178000	4	3	2
SPBC18E5.04|rpl1001|II|60S	SPBC18E5.04|rpl1001|II|60S	9	9	1	>SPBC18E5.04|rpl1001|II|60S ribosomal protein L10	1	9	9	1	8	8	8	8	8	8	8	8	1	1	1	1	45.7	45.7	5	25.373	221	221	0	87.056	By MS/MS	By MS/MS	By MS/MS	By MS/MS	32.6	40.7	32.6	40.7	428700000	74081000	156360000	86452000	111810000	68320000	91548000	83553000	90195000	9	8	7
SPBC18E5.06|rps21|II|40S	SPBC18E5.06|rps21|II|40S	2	2	2	>SPBC18E5.06|rps21|II|40S ribosomal protein S21	1	2	2	2	1	2	2	2	1	2	2	2	1	2	2	2	29.9	29.9	29.9	9.6166	87	87	0	5.5259	By matching	By MS/MS	By MS/MS	By MS/MS	11.5	29.9	29.9	29.9	44724000	9058400	11914000	14751000	9000700	0	10377000	11239000	10028000	0	2	1
SPBC18E5.11c|edc3|II|enhancer	SPBC18E5.11c|edc3|II|enhancer	1	1	1	>SPBC18E5.11c|edc3|II|enhancer of mRNA decapping Edc3	1	1	1	1	0	0	0	1	0	0	0	1	0	0	0	1	4.6	4.6	4.6	49.218	454	454	0	6.6135	By matching	By matching	By matching	By MS/MS	0	0	0	4.6	2732900	0	0	0	2732900	0	0	0	2732900	0	0	0
SPBC18E5.12c|mas2|II|mitochondrial	SPBC18E5.12c|mas2|II|mitochondrial	1	1	1	>SPBC18E5.12c|mas2|II|mitochondrial processing peptidase(MPP) complex alpha subunit Mas2 (predicted)	1	1	1	1	1	1	1	1	1	1	1	1	1	1	1	1	2	2	2	55.577	502	502	0.0039185	2.4585	By MS/MS	By MS/MS	By MS/MS	By MS/MS	2	2	2	2	6698800	1791800	1449500	1618300	1839200	0	0	0	1839200	1	1	0
SPBC18H10.02|lcf1|II|long-chain-fatty-acid-CoA	SPBC18H10.02|lcf1|II|long-chain-fatty-acid-CoA	15	15	15	>SPBC18H10.02|lcf1|II|long-chain-fatty-acid-CoA ligase Lcf1	1	15	15	15	15	12	12	11	15	12	12	11	15	12	12	11	25.6	25.6	25.6	75.965	676	676	0	80.984	By MS/MS	By MS/MS	By MS/MS	By MS/MS	25.6	21.7	19.5	20.3	385590000	110600000	102450000	94696000	77840000	78658000	91135000	83577000	84390000	13	11	10
SPBC18H10.03|tif35|II|translation	SPBC18H10.03|tif35|II|translation	2	2	2	>SPBC18H10.03|tif35|II|translation initiation factor eIF3g	1	2	2	2	2	2	1	1	2	2	1	1	2	2	1	1	11.7	11.7	11.7	31.494	282	282	0	12.534	By MS/MS	By MS/MS	By MS/MS	By MS/MS	11.7	11.7	5	5	22393000	8259000	7990500	3333900	2809400	0	6991800	0	0	2	1	1
SPBC18H10.04c|sce3|II|translation	SPBC18H10.04c|sce3|II|translation	2	2	2	>SPBC18H10.04c|sce3|II|translation initiation factor (predicted)	1	2	2	2	2	1	1	1	2	1	1	1	2	1	1	1	7	7	7	42.513	388	388	0	6.1922	By MS/MS	By matching	By MS/MS	By MS/MS	7	4.6	2.3	4.6	27614000	13831000	2975200	7301000	3507000	11484000	0	0	0	1	0	1
SPBC18H10.12c|rpl701|II|60S	SPBC18H10.12c|rpl701|II|60S	5	5	4	>SPBC18H10.12c|rpl701|II|60S ribosomal protein L7	1	5	5	4	4	4	4	3	4	4	4	3	3	4	3	3	22.7	22.7	18.7	28.73	251	251	0	14.474	By MS/MS	By MS/MS	By MS/MS	By MS/MS	18.3	18.7	18.3	14.7	53933000	9642200	17514000	10426000	16349000	9332800	11414000	10534000	17038000	3	3	4
SPBC1921.01c|rpl35b|II|60S	SPBC1921.01c|rpl35b|II|60S	4	4	3	>SPBC1921.01c|rpl35b|II|60S ribosomal protein L35a (predicted)	1	4	4	3	3	4	3	2	3	4	3	2	2	3	3	2	48.1	48.1	33.3	12.187	108	108	0	25.433	By MS/MS	By MS/MS	By MS/MS	By MS/MS	40.7	48.1	33.3	25.9	69612000	13275000	26139000	14292000	15905000	9678000	14376000	8366900	13974000	4	4	3
SPBC1921.05|ape2|II|aminopeptidase	SPBC1921.05|ape2|II|aminopeptidase	12	12	12	>SPBC1921.05|ape2|II|aminopeptidase Ape2 (predicted)	1	12	12	12	8	10	9	10	8	10	9	10	8	10	9	10	17.8	17.8	17.8	99.445	882	882	0	51.408	By MS/MS	By MS/MS	By MS/MS	By MS/MS	11.7	14.5	12.9	15.4	233480000	52402000	58048000	61330000	61701000	45170000	52927000	48618000	60091000	9	8	8
SPBC19C2.07|fba1|II|fructose-bisphosphate	SPBC19C2.07|fba1|II|fructose-bisphosphate	20	20	20	>SPBC19C2.07|fba1|II|fructose-bisphosphate aldolase Fba1	1	20	20	20	18	19	18	20	18	19	18	20	18	19	18	20	74.9	74.9	74.9	39.57	358	358	0	323.31	By MS/MS	By MS/MS	By MS/MS	By MS/MS	72.6	74.6	74.6	74.9	7683600000	1721600000	2612100000	1583600000	1766300000	1314300000	2229500000	1283600000	1611600000	33	43	36
SPBC19C2.10|SPBC19C2.10|II|BAR	SPBC19C2.10|SPBC19C2.10|II|BAR	3	3	3	>SPBC19C2.10|SPBC19C2.10|II|BAR adaptor protein, human endophilin-A2 ortholog, implicated in endocytosis	1	3	3	3	2	0	1	0	2	0	1	0	2	0	1	0	6.4	6.4	6.4	56.732	501	501	0	6.0153	By MS/MS	By matching	By MS/MS	By matching	4.2	0	2.2	0	0	0	0	0	0	0	0	0	0	2	0	1
SPBC19C7.02|ubr1|II|N-end-recognizing	SPBC19C7.02|ubr1|II|N-end-recognizing	7	7	7	>SPBC19C7.02|ubr1|II|N-end-recognizing protein, UBR ubiquitin-protein ligase E3 Ubr1	1	7	7	7	2	3	3	7	2	3	3	7	2	3	3	7	4.7	4.7	4.7	225.76	1958	1958	0	26.404	By MS/MS	By MS/MS	By MS/MS	By MS/MS	1.4	2.1	2	4.7	41318000	4867900	9079400	11291000	16079000	0	11437000	10464000	11475000	2	3	4
SPBC19C7.06|prs1|II|cytoplasmic	SPBC19C7.06|prs1|II|cytoplasmic	17	17	17	>SPBC19C7.06|prs1|II|cytoplasmic proline-tRNA ligase Prs1 (predicted)	1	17	17	17	13	16	13	15	13	16	13	15	13	16	13	15	38	38	38	78.874	716	716	0	121.8	By MS/MS	By MS/MS	By MS/MS	By MS/MS	28.1	35.2	27	33.2	478140000	105710000	140230000	101960000	130250000	92816000	106610000	94174000	131570000	10	18	12
SPBC19C7.12c|omh1|II|alpha-1,2-mannosyltransferase	SPBC19C7.12c|omh1|II|alpha-1,2-mannosyltransferase	3	3	3	>SPBC19C7.12c|omh1|II|alpha-1,2-mannosyltransferase Omh1	1	3	3	3	2	3	2	1	2	3	2	1	2	3	2	1	7.2	7.2	7.2	46.514	390	390	0	7.3548	By MS/MS	By MS/MS	By MS/MS	By MS/MS	4.4	7.2	5.4	2.6	35982000	11104000	11590000	5350100	7938600	0	10141000	0	0	1	2	2
SPBC19F5.03|sac11|II|inositol	SPBC19F5.03|sac11|II|inositol	10	10	10	>SPBC19F5.03|sac11|II|inositol polyphosphate phosphatase (predicted)	1	10	10	10	9	10	9	10	9	10	9	10	9	10	9	10	19.9	19.9	19.9	68.712	598	598	0	46.445	By MS/MS	By MS/MS	By MS/MS	By MS/MS	18.1	19.9	18.1	19.9	306700000	65158000	91780000	75391000	74374000	52573000	74462000	60124000	84074000	10	10	10
SPBC19F5.04|SPBC19F5.04|II|aspartate	SPBC19F5.04|SPBC19F5.04|II|aspartate	3	3	3	>SPBC19F5.04|SPBC19F5.04|II|aspartate kinase (predicted)	1	3	3	3	3	3	2	3	3	3	2	3	3	3	2	3	9.2	9.2	9.2	56.812	519	519	0	17.577	By MS/MS	By MS/MS	By MS/MS	By MS/MS	9.2	9.2	5.6	9.2	85616000	20551000	29116000	14904000	21045000	17697000	20298000	15944000	21992000	2	3	1
SPBC19F8.07|mcs6|II|TFIIH	SPBC19F8.07|mcs6|II|TFIIH	2	2	2	>SPBC19F8.07|mcs6|II|TFIIH associated cyclin-dependent protein kinase Mcs6	1	2	2	2	1	1	1	1	1	1	1	1	1	1	1	1	7.5	7.5	7.5	38.537	335	335	0	4.8059	By MS/MS	By matching	By matching	By MS/MS	2.7	4.8	2.7	4.8	11199000	2195000	3570100	2157700	3275900	0	0	0	3275900	1	0	0
SPBC19F8.08|rps401|II|40S;SPAC959.07|rps403|I|40S	SPBC19F8.08|rps401|II|40S;SPAC959.07|rps403|I|40S	16;15	16;15	1;1	>SPBC19F8.08|rps401|II|40S ribosomal protein S4 (predicted);>SPAC959.07|rps403|I|40S ribosomal protein S4 (predicted)	2	16	16	1	15	15	16	13	15	15	16	13	1	1	1	1	57.6	57.6	4.6	29.688	262	262;262	0	142.08	By MS/MS	By MS/MS	By MS/MS	By MS/MS	57.6	57.6	57.6	51.1	1793100000	372180000	594200000	362700000	464030000	288080000	478700000	272590000	473000000	18	22	18
SPBC19G7.01c|msh2|II|MutS	SPBC19G7.01c|msh2|II|MutS	10	10	10	>SPBC19G7.01c|msh2|II|MutS protein homolog 2	1	10	10	10	6	6	7	8	6	6	7	8	6	6	7	8	10.3	10.3	10.3	109.74	982	982	0	37.674	By MS/MS	By MS/MS	By MS/MS	By MS/MS	5.6	6.4	6.3	9.6	115650000	29324000	25506000	28502000	32319000	24936000	24746000	23699000	29214000	5	7	5
SPBC19G7.05c|bgs1|II|1,3-beta-glucan	SPBC19G7.05c|bgs1|II|1,3-beta-glucan	4	3	3	>SPBC19G7.05c|bgs1|II|1,3-beta-glucan synthase catalytic subunit Bgs1	1	4	3	3	4	4	3	4	3	3	2	3	3	3	2	3	2.6	2.1	2.1	199.67	1729	1729	0	11.178	By MS/MS	By MS/MS	By MS/MS	By MS/MS	2.6	2.6	1.7	2.6	29760000	6253700	8539900	5635100	9331100	6116800	6288200	6418100	7840800	2	3	1
SPBC19G7.10c|pdc2|II|topoisomerase	SPBC19G7.10c|pdc2|II|topoisomerase	1	1	1	>SPBC19G7.10c|pdc2|II|topoisomerase II-associated deadenylation-dependent mRNA-decapping factor Pdc2 (predicted)	1	1	1	1	0	1	0	1	0	1	0	1	0	1	0	1	1.3	1.3	1.3	84.116	754	754	0.00081433	2.9242	By matching	By MS/MS	By matching	By MS/MS	0	1.3	0	1.3	1606200	0	0	0	1606200	0	0	0	1606200	0	1	0
SPBC19G7.15|nup44|II|nucleoporin	SPBC19G7.15|nup44|II|nucleoporin	10	10	10	>SPBC19G7.15|nup44|II|nucleoporin Nup44	1	10	10	10	7	8	4	8	7	8	4	8	7	8	4	8	31.5	31.5	31.5	44.483	403	403	0	75.64	By MS/MS	By MS/MS	By MS/MS	By MS/MS	22.8	26.8	11.7	26.8	130880000	43202000	46861000	16967000	23853000	32576000	32229000	25467000	24511000	6	7	2
SPBC19G7.17|SPBC19G7.17|II|translocon	SPBC19G7.17|SPBC19G7.17|II|translocon	8	8	8	>SPBC19G7.17|SPBC19G7.17|II|translocon subunit Sec61 homolog (predicted)	1	8	8	8	6	4	7	6	6	4	7	6	6	4	7	6	17.9	17.9	17.9	52.438	475	475	0	45.325	By MS/MS	By MS/MS	By MS/MS	By MS/MS	14.3	10.3	16.4	14.1	159620000	31365000	43829000	39636000	44786000	28384000	37420000	27393000	48815000	5	4	5
SPBC1A4.02c|leu1|II|3-isopropylmalate	SPBC1A4.02c|leu1|II|3-isopropylmalate	6	6	6	>SPBC1A4.02c|leu1|II|3-isopropylmalate dehydrogenase Leu1	1	6	6	6	5	5	4	5	5	5	4	5	5	5	4	5	27.8	27.8	27.8	39.732	371	371	0	27.088	By MS/MS	By MS/MS	By MS/MS	By MS/MS	22.9	21.8	17	22.9	102250000	27837000	28375000	18473000	27566000	21976000	23867000	19317000	25650000	4	4	3
SPBC1A4.08c|cct3|II|chaperonin-containing	SPBC1A4.08c|cct3|II|chaperonin-containing	14	14	14	>SPBC1A4.08c|cct3|II|chaperonin-containing T-complex gamma subunit Cct3	1	14	14	14	11	6	7	7	11	6	7	7	11	6	7	7	39	39	39	58.48	528	528	0	86.21	By MS/MS	By MS/MS	By MS/MS	By MS/MS	25.2	20.3	17.4	22.5	230960000	73443000	35322000	47230000	74970000	50145000	40343000	44290000	58162000	9	5	5
SPBC1A4.10c|med14|II|mediator	SPBC1A4.10c|med14|II|mediator	10	10	10	>SPBC1A4.10c|med14|II|mediator complex subunit Med14	1	10	10	10	7	5	4	5	7	5	4	5	7	5	4	5	14.9	14.9	14.9	100.83	879	879	0	28.361	By MS/MS	By MS/MS	By MS/MS	By MS/MS	11	6.9	4.7	6.9	46275000	15979000	14400000	7420900	8475500	10609000	10622000	8190600	11069000	8	3	2
SPBC1E8.02|SPBC1E8.02|II|ubiquitin	SPBC1E8.02|SPBC1E8.02|II|ubiquitin	8	8	8	>SPBC1E8.02|SPBC1E8.02|II|ubiquitin family protein (predicted)	1	8	8	8	6	4	6	4	6	4	6	4	6	4	6	4	21.6	21.6	21.6	66.566	603	603	0	35.211	By MS/MS	By MS/MS	By MS/MS	By MS/MS	12.3	6.6	10.9	13.3	85743000	31000000	13989000	23975000	16778000	20931000	17168000	20848000	15672000	4	4	3
SPBC20F10.10|psl1|II|cyclin	SPBC20F10.10|psl1|II|cyclin	1	1	1	>SPBC20F10.10|psl1|II|cyclin pho85 family Psl1 (predicted)	1	1	1	1	1	0	0	0	1	0	0	0	1	0	0	0	4.1	4.1	4.1	27.936	243	243	0.002381	2.5982	By MS/MS	By matching	By matching	By matching	4.1	0	0	0	920760	920760	0	0	0	764530	0	0	0	0	0	0
SPBC21.05c|ral2|II|Ras1-Scd	SPBC21.05c|ral2|II|Ras1-Scd	1	1	1	>SPBC21.05c|ral2|II|Ras1-Scd pathway protein Ral2	1	1	1	1	0	0	1	1	0	0	1	1	0	0	1	1	2	2	2	69.847	611	611	0.0083587	2.2067	By matching	By matching	By matching	By MS/MS	0	0	2	2	4075400	0	0	1591900	2483500	0	0	0	2483500	0	0	0
SPBC211.04c|mcm6|II|MCM	SPBC211.04c|mcm6|II|MCM	1	1	1	>SPBC211.04c|mcm6|II|MCM complex subunit Mcm6	1	1	1	1	1	1	0	0	1	1	0	0	1	1	0	0	1.5	1.5	1.5	99.549	892	892	0.0053971	2.2876	By MS/MS	By MS/MS	By matching	By matching	1.5	1.5	0	0	0	0	0	0	0	0	0	0	0	1	1	0
SPBC215.01|SPBC215.01|II|GTPase	SPBC215.01|SPBC215.01|II|GTPase	1	1	1	>SPBC215.01|SPBC215.01|II|GTPase activating protein (predicted)	1	1	1	1	0	1	0	0	0	1	0	0	0	1	0	0	1.3	1.3	1.3	95.005	834	834	0	4.4731	By matching	By MS/MS	By matching	By matching	0	1.3	0	0	0	0	0	0	0	0	0	0	0	0	1	0
SPBC215.05|gpd1|II|glycerol-3-phosphate	SPBC215.05|gpd1|II|glycerol-3-phosphate	15	15	15	>SPBC215.05|gpd1|II|glycerol-3-phosphate dehydrogenase Gpd1	1	15	15	15	14	14	14	11	14	14	14	11	14	14	14	11	57.1	57.1	57.1	41.995	385	385	0	257.6	By MS/MS	By MS/MS	By MS/MS	By MS/MS	52.2	52.2	51.9	45.2	1089200000	276050000	304100000	283500000	225600000	215010000	254120000	219770000	266820000	20	20	18
SPBC215.08c|arg4|II|arginine	SPBC215.08c|arg4|II|arginine	12	11	11	>SPBC215.08c|arg4|II|arginine specific carbamoyl-phosphate synthase Arg4 (predicted)	1	12	11	11	8	11	5	10	7	10	4	9	7	10	4	9	10.9	10.3	10.3	127.48	1160	1160	0	62.519	By MS/MS	By MS/MS	By MS/MS	By MS/MS	7.2	10.1	4.1	9.1	125790000	29842000	51180000	20673000	24093000	25156000	28463000	32448000	24713000	5	9	3
SPBC215.09c|erg10|II|acetyl-CoA	SPBC215.09c|erg10|II|acetyl-CoA	10	10	10	>SPBC215.09c|erg10|II|acetyl-CoA C-acetyltransferase Erg10 (predicted)	1	10	10	10	10	10	8	9	10	10	8	9	10	10	8	9	35.4	35.4	35.4	40.997	395	395	0	64.392	By MS/MS	By MS/MS	By MS/MS	By MS/MS	35.4	35.4	23.5	30.4	424880000	133790000	107450000	95567000	88071000	106130000	95578000	83146000	81885000	9	8	8
SPBC215.12|cwf10|II|U5	SPBC215.12|cwf10|II|U5	4	3	3	>SPBC215.12|cwf10|II|U5 snRNP GTPase subunit Cwf10	1	4	3	3	2	3	3	1	1	2	2	0	1	2	2	0	5.1	4.1	4.1	111.31	984	984	0	7.4954	By matching	By MS/MS	By MS/MS	By matching	2.2	3.8	3.6	1	9440700	652430	5376900	3411400	0	0	4704900	0	0	0	2	1
SPBC215.15|sec13|II|COPII-coated	SPBC215.15|sec13|II|COPII-coated	4	4	4	>SPBC215.15|sec13|II|COPII-coated vesicle component Sec13	1	4	4	4	3	4	3	3	3	4	3	3	3	4	3	3	16.5	16.5	16.5	32.568	297	297	0	12.816	By MS/MS	By MS/MS	By MS/MS	By MS/MS	14.1	16.5	11.1	14.1	77742000	17604000	32130000	6127500	21881000	13308000	24944000	11757000	19678000	1	4	3
SPBC216.07c|tor2|II|serine/threonine	SPBC216.07c|tor2|II|serine/threonine	14	14	14	>SPBC216.07c|tor2|II|serine/threonine protein kinase Tor2	1	14	14	14	3	8	9	4	3	8	9	4	3	8	9	4	8.4	8.4	8.4	266.38	2337	2337	0	43.411	By MS/MS	By MS/MS	By MS/MS	By MS/MS	1.8	5.3	5.5	2.5	61222000	4876000	19657000	26443000	10246000	0	15759000	18115000	15475000	2	5	7
SPBC21B10.03c|ath1|II|ataxin-2	SPBC21B10.03c|ath1|II|ataxin-2	1	1	1	>SPBC21B10.03c|ath1|II|ataxin-2 homolog	1	1	1	1	1	0	0	0	1	0	0	0	1	0	0	0	2.1	2.1	2.1	85.523	791	791	0	5.1266	By MS/MS	By matching	By matching	By matching	2.1	0	0	0	2569000	2569000	0	0	0	2133100	0	0	0	0	0	0
SPBC21B10.04c|nrf1|II|GTPase	SPBC21B10.04c|nrf1|II|GTPase	2	2	2	>SPBC21B10.04c|nrf1|II|GTPase regulator Nrf1	1	2	2	2	2	2	2	2	2	2	2	2	2	2	2	2	18.9	18.9	18.9	13.388	122	122	0	14.693	By MS/MS	By MS/MS	By MS/MS	By MS/MS	18.9	18.9	18.9	18.9	126550000	29810000	33010000	36033000	27692000	25224000	27543000	27902000	30507000	1	1	1
SPBC21B10.10|rps402|II|40S	SPBC21B10.10|rps402|II|40S	16	1	1	>SPBC21B10.10|rps402|II|40S ribosomal protein S4 (predicted)	1	16	1	1	15	15	16	13	1	1	1	1	1	1	1	1	57.6	4.6	4.6	29.658	262	262	0	5.2885	By MS/MS	By MS/MS	By MS/MS	By MS/MS	57.6	57.6	57.6	51.1	107250000	21886000	42377000	20659000	22326000	0	0	0	22326000	1	1	1
SPBC21C3.12c|SPBC21C3.12c|II|DUF953	SPBC21C3.12c|SPBC21C3.12c|II|DUF953	1	1	1	>SPBC21C3.12c|SPBC21C3.12c|II|DUF953 thioredoxin family protein	1	1	1	1	1	1	1	1	1	1	1	1	1	1	1	1	8.9	8.9	8.9	13.932	124	124	0.0076453	2.2353	By MS/MS	By MS/MS	By matching	By MS/MS	8.9	8.9	8.9	8.9	7411900	2138100	1402700	2349500	1521700	0	0	0	1521700	1	1	0
SPBC21C3.13|rps1901|II|40S	SPBC21C3.13|rps1901|II|40S	4	4	2	>SPBC21C3.13|rps1901|II|40S ribosomal protein S19 (predicted)	1	4	4	2	4	4	3	4	4	4	3	4	2	2	1	2	24.3	24.3	7.6	16.15	144	144	0	20.569	By MS/MS	By MS/MS	By MS/MS	By MS/MS	24.3	24.3	23.6	24.3	332870000	86647000	90193000	80206000	75827000	61924000	68981000	61685000	66383000	4	4	2
SPBC21C3.15c|SPBC21C3.15c|II|aldehyde	SPBC21C3.15c|SPBC21C3.15c|II|aldehyde	2	2	2	>SPBC21C3.15c|SPBC21C3.15c|II|aldehyde dehydrogenase (predicted)	1	2	2	2	0	0	1	1	0	0	1	1	0	0	1	1	5	5	5	57.571	522	522	0	5.5475	By matching	By matching	By MS/MS	By MS/MS	0	0	2.7	2.3	1819800	0	0	0	1819800	0	0	0	1819800	0	0	1
SPBC21D10.09c|rkr1|II|RQC	SPBC21D10.09c|rkr1|II|RQC	8	8	8	>SPBC21D10.09c|rkr1|II|RQC complex ubiquitin-protein ligase E3 Rkr1 (predicted)	1	8	8	8	6	3	6	4	6	3	6	4	6	3	6	4	6.5	6.5	6.5	184.37	1610	1610	0	21.392	By MS/MS	By MS/MS	By MS/MS	By MS/MS	5.1	3.1	4.3	2.5	50382000	13390000	12769000	13095000	11128000	10793000	11970000	9526500	11976000	5	3	4
SPBC21D10.11c|nfs1|II|mitochondrial	SPBC21D10.11c|nfs1|II|mitochondrial	1	1	1	>SPBC21D10.11c|nfs1|II|mitochondrial cysteine desulfurase Nfs1 (predicted)	1	1	1	1	1	1	1	1	1	1	1	1	1	1	1	1	3.4	3.4	3.4	55.543	501	501	0	12.326	By MS/MS	By MS/MS	By MS/MS	By MS/MS	3.4	3.4	3.4	3.4	2893500	0	2893500	0	0	0	2531900	0	0	1	1	1
SPBC21D10.12|hob1|II|BAR	SPBC21D10.12|hob1|II|BAR	1	1	1	>SPBC21D10.12|hob1|II|BAR adaptor protein Hob1	1	1	1	1	1	1	1	1	1	1	1	1	1	1	1	1	2.1	2.1	2.1	51.391	466	466	0	3.5589	By MS/MS	By MS/MS	By matching	By MS/MS	2.1	2.1	2.1	2.1	20975000	6081700	5728200	5258000	3907100	0	0	0	3907100	1	1	0
SPBC21H7.02|taf10|II|SAGA	SPBC21H7.02|taf10|II|SAGA	1	1	1	>SPBC21H7.02|taf10|II|SAGA complex/transcription factor TFIID complex subunit Taf10	1	1	1	1	1	1	0	0	1	1	0	0	1	1	0	0	6.5	6.5	6.5	23.526	215	215	0	3.2493	By MS/MS	By MS/MS	By matching	By matching	6.5	6.5	0	0	11376000	6943400	4432700	0	0	0	3878700	0	0	1	1	0
SPBC21H7.07c|his5|II|imidazoleglycerol-phosphate	SPBC21H7.07c|his5|II|imidazoleglycerol-phosphate	8	8	8	>SPBC21H7.07c|his5|II|imidazoleglycerol-phosphate dehydratase His5	1	8	8	8	7	6	8	5	7	6	8	5	7	6	8	5	48.1	48.1	48.1	23.52	216	216	0	29.908	By MS/MS	By MS/MS	By MS/MS	By MS/MS	47.7	41.2	48.1	38	173580000	48946000	34017000	56493000	34120000	38877000	35617000	37580000	39247000	7	5	4
SPBC23E6.04c|utp10|II|U3	SPBC23E6.04c|utp10|II|U3	6	6	6	>SPBC23E6.04c|utp10|II|U3 snoRNP-associated protein Utp10 (predicted)	1	6	6	6	4	5	4	5	4	5	4	5	4	5	4	5	4.8	4.8	4.8	186.41	1649	1649	0	12.386	By MS/MS	By MS/MS	By MS/MS	By MS/MS	3.5	4	2.4	4	89955000	6409300	30006000	25921000	27619000	0	22858000	26284000	26203000	2	2	3
SPBC23E6.09|ssn6|II|transcriptional	SPBC23E6.09|ssn6|II|transcriptional	1	1	1	>SPBC23E6.09|ssn6|II|transcriptional corepressor Ssn6	1	1	1	1	0	1	0	1	0	1	0	1	0	1	0	1	0.8	0.8	0.8	121.52	1102	1102	0	12.3	By matching	By MS/MS	By matching	By matching	0	0.8	0	0.8	5225900	0	3582200	0	1643700	0	0	0	1643700	0	0	0
SPBC23G7.04c|nif1|II|SEL1	SPBC23G7.04c|nif1|II|SEL1	4	4	4	>SPBC23G7.04c|nif1|II|SEL1 repeat protein Nif1	1	4	4	4	1	2	3	3	1	2	3	3	1	2	3	3	10.3	10.3	10.3	75.449	681	681	0	34.127	By MS/MS	By MS/MS	By MS/MS	By MS/MS	3.4	6.3	7.3	7.3	29088000	2686400	6237000	7515400	12649000	0	0	0	12649000	1	2	3
SPBC23G7.08c|rga7|II|Rho-type	SPBC23G7.08c|rga7|II|Rho-type	2	2	2	>SPBC23G7.08c|rga7|II|Rho-type GTPase activating protein Rga7	1	2	2	2	1	1	2	1	1	1	2	1	1	1	2	1	3	3	3	76.678	695	695	0	4.5626	By MS/MS	By matching	By MS/MS	By matching	1	2	3	1	8831900	1084100	2293800	4410100	1044000	0	0	3653000	0	1	0	1
SPBC23G7.12c|rpt6|II|19S	SPBC23G7.12c|rpt6|II|19S	12	12	11	>SPBC23G7.12c|rpt6|II|19S proteasome regulatory subunit Rpt6 (predicted)	1	12	12	11	6	6	10	8	6	6	10	8	5	5	9	7	39.2	39.2	36.2	45.069	403	403	0	68.188	By MS/MS	By MS/MS	By MS/MS	By MS/MS	22.6	22.3	29.8	29.8	176610000	21712000	23650000	70442000	60808000	20582000	27717000	52324000	57257000	4	5	8
SPBC244.01c|sid4|II|SIN	SPBC244.01c|sid4|II|SIN	1	1	1	>SPBC244.01c|sid4|II|SIN component scaffold protein Sid4	1	1	1	1	1	0	1	0	1	0	1	0	1	0	1	0	1.5	1.5	1.5	74.472	660	660	0.0023943	2.6522	By MS/MS	By matching	By MS/MS	By matching	1.5	0	1.5	0	4690000	2548500	0	2141500	0	0	0	1773900	0	2	0	1
SPBC24C6.04|SPBC24C6.04|II|delta-1-pyrroline-5-carboxylate	SPBC24C6.04|SPBC24C6.04|II|delta-1-pyrroline-5-carboxylate	19	19	19	>SPBC24C6.04|SPBC24C6.04|II|delta-1-pyrroline-5-carboxylate dehydrogenase (predicted)	1	19	19	19	18	15	18	12	18	15	18	12	18	15	18	12	46.7	46.7	46.7	60.218	548	548	0	207.48	By MS/MS	By MS/MS	By MS/MS	By MS/MS	45.1	38.9	44.7	29.2	1061600000	275960000	261560000	312690000	211420000	207540000	243110000	241600000	236200000	19	18	18
SPBC25B2.09c|mrs1|II|mitochondrial	SPBC25B2.09c|mrs1|II|mitochondrial	12	12	12	>SPBC25B2.09c|mrs1|II|mitochondrial and cytoplasmic arginine-tRNA ligase Rrs1/Mrs1 (predicted)	1	12	12	12	11	9	9	9	11	9	9	9	11	9	9	9	23.1	23.1	23.1	70.689	618	618	0	53.075	By MS/MS	By MS/MS	By MS/MS	By MS/MS	19.7	15.4	15.4	16.7	158220000	46393000	41863000	37975000	31987000	35293000	34970000	31975000	35249000	8	6	6
SPBC25D12.03c|mcm7|II|MCM	SPBC25D12.03c|mcm7|II|MCM	4	4	4	>SPBC25D12.03c|mcm7|II|MCM complex subunit Mcm7	1	4	4	4	1	2	2	1	1	2	2	1	1	2	2	1	7.6	7.6	7.6	85.621	760	760	0	8.4714	By MS/MS	By MS/MS	By MS/MS	By MS/MS	2.1	4.7	2.9	2.1	8080900	0	3128800	1352100	3600000	0	0	0	3600000	1	2	2
SPBC25D12.04|suc22|II|ribonucleotide	SPBC25D12.04|suc22|II|ribonucleotide	18	18	18	>SPBC25D12.04|suc22|II|ribonucleotide reductase small subunit Suc22	1	18	18	18	15	13	15	10	15	13	15	10	15	13	15	10	49.9	49.9	49.9	45.405	391	391	0	92.012	By MS/MS	By MS/MS	By MS/MS	By MS/MS	38.9	38.9	38.9	30.9	728280000	188140000	236130000	206140000	97877000	147310000	189850000	157630000	126440000	15	16	14
SPBC25D12.05|trm1|II|tRNA	SPBC25D12.05|trm1|II|tRNA	2	2	2	>SPBC25D12.05|trm1|II|tRNA (guanine-N2-)-methyltransferase Trm1	1	2	2	2	1	1	0	1	1	1	0	1	1	1	0	1	3.8	3.8	3.8	60.297	548	548	0	4.7573	By MS/MS	By MS/MS	By matching	By MS/MS	1.5	2.4	0	2.4	5552500	0	1948700	0	3603700	0	0	0	3603700	1	1	0
SPBC25H2.02|trs1|II|cytoplasmic	SPBC25H2.02|trs1|II|cytoplasmic	25	25	25	>SPBC25H2.02|trs1|II|cytoplasmic threonine-tRNA ligase Trs1 (predicted)	1	25	25	25	23	22	24	21	23	22	24	21	23	22	24	21	45	45	45	80.137	703	703	0	203.14	By MS/MS	By MS/MS	By MS/MS	By MS/MS	40.4	40.5	43.8	38.4	1062600000	249460000	302120000	277290000	233690000	203460000	250060000	203000000	254520000	22	25	21
SPBC25H2.05|egd2|II|nascent	SPBC25H2.05|egd2|II|nascent	1	1	1	>SPBC25H2.05|egd2|II|nascent polypeptide-associated complex alpha subunit Egd2	1	1	1	1	1	1	1	1	1	1	1	1	1	1	1	1	7.5	7.5	7.5	18.785	173	173	0	3.4667	By MS/MS	By MS/MS	By MS/MS	By MS/MS	7.5	7.5	7.5	7.5	17127000	5154800	3874700	3335000	4762100	0	0	0	4762100	1	1	2
SPBC25H2.11c|spt7|II|SAGA	SPBC25H2.11c|spt7|II|SAGA	2	2	2	>SPBC25H2.11c|spt7|II|SAGA complex bromodomain subunit Spt7	1	2	2	2	2	2	1	1	2	2	1	1	2	2	1	1	1.9	1.9	1.9	112.9	992	992	0	4.0578	By MS/MS	By MS/MS	By MS/MS	By matching	1.9	1.9	1.7	1.7	83863000	31565000	12623000	33760000	5915300	26209000	0	0	0	1	1	1
SPBC25H2.12c|cct7|II|chaperonin-containing	SPBC25H2.12c|cct7|II|chaperonin-containing	7	7	7	>SPBC25H2.12c|cct7|II|chaperonin-containing T-complex eta subunit Cct7	1	7	7	7	4	2	2	2	4	2	2	2	4	2	2	2	15.4	15.4	15.4	60.686	558	558	0	21.579	By MS/MS	By MS/MS	By MS/MS	By MS/MS	10.2	5.6	5.6	3.9	17231000	5185400	6924900	5120400	0	4305600	0	0	0	3	1	1
SPBC25H2.16c|gga22|II|Golgi	SPBC25H2.16c|gga22|II|Golgi	4	4	4	>SPBC25H2.16c|gga22|II|Golgi localized Arf binding gamma-adaptin ortholog Gga22	1	4	4	4	3	2	3	2	3	2	3	2	3	2	3	2	8.3	8.3	8.3	59.481	533	533	0	24.374	By MS/MS	By MS/MS	By MS/MS	By MS/MS	4.9	3.4	6.8	3.4	22567000	8399300	2561400	6831700	4774300	6954700	0	5925500	4527200	3	2	3
SPBC26H8.01|thi2|II|thiazole	SPBC26H8.01|thi2|II|thiazole	11	11	11	>SPBC26H8.01|thi2|II|thiazole biosynthetic enzyme	1	11	11	11	10	9	11	9	10	9	11	9	10	9	11	9	45.4	45.4	45.4	35.274	328	328	0	201.29	By MS/MS	By MS/MS	By MS/MS	By MS/MS	39	36.9	45.4	36.9	2232600000	609720000	571390000	584950000	466570000	478110000	452760000	484070000	445920000	16	15	16
SPBC26H8.03|cho2|II|phosphatidylethanolamine	SPBC26H8.03|cho2|II|phosphatidylethanolamine	17	17	17	>SPBC26H8.03|cho2|II|phosphatidylethanolamine N-methyltransferase Cho2	1	17	17	17	15	10	16	8	15	10	16	8	15	10	16	8	24.5	24.5	24.5	102.76	905	905	0	134.21	By MS/MS	By MS/MS	By MS/MS	By MS/MS	21.9	16.8	24.1	12.3	341520000	128580000	59212000	103570000	50164000	93576000	61836000	69440000	69674000	16	9	12
SPBC26H8.07c|nda3|II|tubulin	SPBC26H8.07c|nda3|II|tubulin	8	8	7	>SPBC26H8.07c|nda3|II|tubulin beta Nda3	1	8	8	7	8	7	6	5	8	7	6	5	7	6	5	4	25.2	25.2	23	49.471	448	448	0	61.565	By MS/MS	By MS/MS	By MS/MS	By MS/MS	25.2	22.8	19.4	15.6	277780000	74842000	62778000	91641000	48514000	53435000	46998000	54217000	51887000	8	8	9
SPBC26H8.11c|SPBC26H8.11c|II|thioesterase	SPBC26H8.11c|SPBC26H8.11c|II|thioesterase	2	2	2	>SPBC26H8.11c|SPBC26H8.11c|II|thioesterase superfamily protein	1	2	2	2	2	2	1	1	2	2	1	1	2	2	1	1	10.9	10.9	10.9	19.59	175	175	0	5.0008	By MS/MS	By MS/MS	By MS/MS	By MS/MS	10.9	10.9	6.3	6.3	60109000	19273000	17290000	12008000	11538000	16018000	15113000	0	0	3	3	1
SPBC27.08c|sua1|II|sulfate	SPBC27.08c|sua1|II|sulfate	11	11	11	>SPBC27.08c|sua1|II|sulfate adenylyltransferase	1	11	11	11	9	10	9	8	9	10	9	8	9	10	9	8	26.5	26.5	26.5	54.754	490	490	0	46.944	By MS/MS	By MS/MS	By MS/MS	By MS/MS	21.4	23.5	22.9	18.6	183120000	36511000	61983000	45531000	39091000	36730000	46749000	34457000	41807000	9	12	5
SPBC27B12.03c|erg32|II|C-5	SPBC27B12.03c|erg32|II|C-5	4	4	4	>SPBC27B12.03c|erg32|II|C-5 sterol desaturase Erg32	1	4	4	4	2	2	2	1	2	2	2	1	2	2	2	1	13.1	13.1	13.1	39.063	329	329	0	20.495	By MS/MS	By MS/MS	By MS/MS	By MS/MS	6.4	6.4	6.7	3.6	36188000	9736300	10480000	14186000	1784900	0	9170300	0	0	2	2	2
SPBC27B12.04c|far11|II|SIP/FAR	SPBC27B12.04c|far11|II|SIP/FAR	2	2	2	>SPBC27B12.04c|far11|II|SIP/FAR complex subunit, Far11/Csc2	1	2	2	2	0	1	1	2	0	1	1	2	0	1	1	2	2.7	2.7	2.7	95.092	817	817	0	5.659	By matching	By MS/MS	By matching	By MS/MS	0	1.6	1.6	2.7	5930200	0	3554300	2375900	0	0	0	1968000	0	0	1	0
SPBC27B12.08|sip1|II|Pof6	SPBC27B12.08|sip1|II|Pof6	8	8	8	>SPBC27B12.08|sip1|II|Pof6 interacting protein Sip1, predicted AP-1 accessory protein	1	8	8	8	7	3	4	5	7	3	4	5	7	3	4	5	4.1	4.1	4.1	217.69	1919	1919	0	15.93	By MS/MS	By MS/MS	By MS/MS	By MS/MS	3.7	1.5	1.9	2.7	105040000	29680000	20638000	33318000	21408000	21486000	22955000	24216000	23052000	5	1	1
SPBC27B12.11c|pho7|II|transcription	SPBC27B12.11c|pho7|II|transcription	3	3	3	>SPBC27B12.11c|pho7|II|transcription factor Pho7	1	3	3	3	3	1	0	0	3	1	0	0	3	1	0	0	9.8	9.8	9.8	81.928	738	738	0	6.0312	By MS/MS	By matching	By matching	By matching	9.8	3.9	0	0	29455000	19849000	9605700	0	0	16481000	0	0	0	4	0	0
SPBC27B12.13|tom40|II|mitochondrial	SPBC27B12.13|tom40|II|mitochondrial	4	4	4	>SPBC27B12.13|tom40|II|mitochondrial TOM complex subunit Tom40 (predicted)	1	4	4	4	1	2	2	1	1	2	2	1	1	2	2	1	11.6	11.6	11.6	37.552	344	344	0	10.501	By MS/MS	By MS/MS	By MS/MS	By MS/MS	2	7.6	4.1	4.9	21104000	1815200	3942800	12679000	2666300	0	0	0	2666300	1	2	2
SPBC28E12.06c|lvs1|II|beige	SPBC28E12.06c|lvs1|II|beige	7	7	7	>SPBC28E12.06c|lvs1|II|beige protein homolog Lvs1 (predicted)	1	7	7	7	7	6	3	5	7	6	3	5	7	6	3	5	3.8	3.8	3.8	295.65	2609	2609	0	19.074	By MS/MS	By MS/MS	By MS/MS	By MS/MS	3.8	3.3	1.6	2.8	67105000	20872000	20266000	9776900	16190000	14652000	16002000	14423000	14276000	3	2	3
SPBC28F2.03|ppi1|II|cyclophilin	SPBC28F2.03|ppi1|II|cyclophilin	8	8	8	>SPBC28F2.03|ppi1|II|cyclophilin family peptidyl-prolyl cis-trans isomerase Cyp2	1	8	8	8	8	7	8	6	8	7	8	6	8	7	8	6	69.8	69.8	69.8	17.402	162	162	0	65.099	By MS/MS	By MS/MS	By MS/MS	By MS/MS	69.8	48.8	69.8	60.5	842640000	297020000	184370000	201830000	159430000	179950000	153020000	142440000	152800000	13	8	11
SPBC28F2.12|rpb1|II|RNA	SPBC28F2.12|rpb1|II|RNA	3	2	2	>SPBC28F2.12|rpb1|II|RNA polymerase II large subunit Rpb1	1	3	2	2	2	2	2	1	1	2	1	1	1	2	1	1	1.8	1.3	1.3	194.16	1752	1752	0	6.0674	By MS/MS	By MS/MS	By MS/MS	By MS/MS	1	1.3	1	0.5	8568800	1753500	4808000	2007300	0	0	4207100	0	0	1	2	1
SPBC29A10.01|ccr1|II|NADPH-cytochrome	SPBC29A10.01|ccr1|II|NADPH-cytochrome	7	7	7	>SPBC29A10.01|ccr1|II|NADPH-cytochrome p450 reductase	1	7	7	7	5	4	5	3	5	4	5	3	5	4	5	3	14.6	14.6	14.6	76.774	678	678	0	29.931	By MS/MS	By MS/MS	By MS/MS	By MS/MS	10.9	8.7	10.3	6.9	65948000	15804000	26325000	11653000	12166000	12107000	16916000	9535200	19418000	3	3	3
SPBC29A10.07|pom152|II|nucleoporin	SPBC29A10.07|pom152|II|nucleoporin	2	2	2	>SPBC29A10.07|pom152|II|nucleoporin Pom152	1	2	2	2	1	2	0	1	1	2	0	1	1	2	0	1	1.3	1.3	1.3	139.58	1250	1250	0	3.1929	By MS/MS	By MS/MS	By matching	By MS/MS	0.6	1.3	0	0.6	1904700	0	1904700	0	0	0	1666600	0	0	1	2	0
SPBC29A3.01|ccc2|II|copper	SPBC29A3.01|ccc2|II|copper	2	2	2	>SPBC29A3.01|ccc2|II|copper transporting ATPase Ccc2 (predicted)	1	2	2	2	1	2	1	1	1	2	1	1	1	2	1	1	2.3	2.3	2.3	97.894	904	904	0	6.1222	By MS/MS	By MS/MS	By MS/MS	By MS/MS	0.9	2.3	0.9	0.9	8625400	2340000	2587200	1939300	1758800	0	2263900	0	0	1	2	1
SPBC29A3.03c|gid2|II|GID	SPBC29A3.03c|gid2|II|GID	1	1	1	>SPBC29A3.03c|gid2|II|GID complex ubiquitin-protein ligase E3 subunit Gid2/Rmd5 (predicted)	1	1	1	1	1	0	0	1	1	0	0	1	1	0	0	1	2	2	2	45.63	398	398	0	4.3251	By MS/MS	By matching	By matching	By MS/MS	2	0	0	2	2256300	1392700	0	0	863550	0	0	0	863550	1	0	0
SPBC29A3.04|rpl8|II|60S	SPBC29A3.04|rpl8|II|60S	6	6	6	>SPBC29A3.04|rpl8|II|60S ribosomal protein L7a/L8 (predicted)	1	6	6	6	6	6	4	5	6	6	4	5	6	6	4	5	21.6	21.6	21.6	28.606	259	259	0	21.124	By MS/MS	By MS/MS	By MS/MS	By MS/MS	21.6	21.6	16.6	17.4	186400000	56227000	48230000	43685000	38257000	40576000	42483000	41393000	38878000	6	4	5
SPBC29A3.09c|gcn20|II|AAA	SPBC29A3.09c|gcn20|II|AAA	4	4	4	>SPBC29A3.09c|gcn20|II|AAA family ATPase Gcn20 (predicted)	1	4	4	4	3	3	3	4	3	3	3	4	3	3	3	4	7.1	7.1	7.1	83.761	736	736	0	12.274	By MS/MS	By MS/MS	By MS/MS	By MS/MS	5.7	5.7	5.7	7.1	77184000	18488000	20402000	14872000	23422000	16167000	18171000	13065000	21540000	3	2	3
SPBC29A3.18|cyt1|II|cytochrome	SPBC29A3.18|cyt1|II|cytochrome	9	9	9	>SPBC29A3.18|cyt1|II|cytochrome c1 Cyt1 (predicted)	1	9	9	9	9	7	9	8	9	7	9	8	9	7	9	8	36.5	36.5	36.5	34.34	307	307	0	146.71	By MS/MS	By MS/MS	By MS/MS	By MS/MS	36.5	31.6	36.5	31.6	572960000	138740000	153710000	150790000	129730000	106010000	146710000	103330000	148270000	8	7	9
SPBC29B5.03c|rpl26|II|60S	SPBC29B5.03c|rpl26|II|60S	2	2	2	>SPBC29B5.03c|rpl26|II|60S ribosomal protein L26 (predicted)	1	2	2	2	1	2	1	1	1	2	1	1	1	2	1	1	13.5	13.5	13.5	14.341	126	126	0	9.6487	By MS/MS	By MS/MS	By MS/MS	By MS/MS	5.6	13.5	5.6	5.6	11112000	0	5985200	5127100	0	0	5237100	0	0	1	2	1
SPBC2A9.02|SPBC2A9.02|II|NAD	SPBC2A9.02|SPBC2A9.02|II|NAD	2	2	2	>SPBC2A9.02|SPBC2A9.02|II|NAD dependent epimerase/dehydratase family protein	1	2	2	2	1	1	1	2	1	1	1	2	1	1	1	2	8.1	8.1	8.1	31.516	295	295	0	4.7033	By MS/MS	By matching	By MS/MS	By MS/MS	3.4	3.4	3.4	8.1	10070000	1406400	1978900	1813900	4871100	0	0	0	4871100	1	0	1
SPBC2A9.06c|nus1|II|di-trans,poly-cis-decaprenylcistransferase	SPBC2A9.06c|nus1|II|di-trans,poly-cis-decaprenylcistransferase	3	3	3	>SPBC2A9.06c|nus1|II|di-trans,poly-cis-decaprenylcistransferase Nus1	1	3	3	3	0	2	1	0	0	2	1	0	0	2	1	0	16.3	16.3	16.3	29.862	258	258	0	4.191	By matching	By MS/MS	By MS/MS	By matching	0	12.4	3.9	0	6488800	0	0	6488800	0	0	0	5374800	0	0	2	1
SPBC2D10.05|exg3|II|glucan	SPBC2D10.05|exg3|II|glucan	10	10	10	>SPBC2D10.05|exg3|II|glucan 1,3-beta-glucosidase Exg3	1	10	10	10	9	7	8	5	9	7	8	5	9	7	8	5	24.1	24.1	24.1	53.701	464	464	0	37.712	By MS/MS	By MS/MS	By MS/MS	By MS/MS	21.3	17.5	19.4	12.7	157580000	44132000	39754000	34626000	39071000	31274000	29539000	36581000	37511000	9	9	9
SPBC2D10.10c|fib1|II|fibrillarin,	SPBC2D10.10c|fib1|II|fibrillarin,	3	3	3	>SPBC2D10.10c|fib1|II|fibrillarin, rRNA methyltransferase	1	3	3	3	2	3	2	2	2	3	2	2	2	3	2	2	12.5	12.5	12.5	32.04	305	305	0	8.417	By matching	By MS/MS	By MS/MS	By MS/MS	8.9	12.5	9.8	8.9	30747000	4519800	12563000	7274500	6389500	4949400	9343400	0	6842600	0	2	1
SPBC2D10.14c|myo51|II|myosin	SPBC2D10.14c|myo51|II|myosin	21	21	20	>SPBC2D10.14c|myo51|II|myosin type V	1	21	21	20	18	14	15	17	18	14	15	17	17	13	14	16	19.4	19.4	18.6	167.66	1471	1471	0	156.49	By MS/MS	By MS/MS	By MS/MS	By MS/MS	16.6	13.4	15	16.2	338630000	104790000	63439000	82779000	87623000	82079000	65651000	70769000	80213000	13	12	12
SPBC2F12.05c|SPBC2F12.05c|II|sterol	SPBC2F12.05c|SPBC2F12.05c|II|sterol	9	9	9	>SPBC2F12.05c|SPBC2F12.05c|II|sterol binding ankyrin repeat protein (predicted)	1	9	9	9	5	7	7	6	5	7	7	6	5	7	7	6	8.5	8.5	8.5	148.47	1310	1310	0	59.207	By MS/MS	By MS/MS	By MS/MS	By MS/MS	4.5	6.1	6.9	4.9	97601000	28632000	25189000	21546000	22234000	25225000	18499000	16882000	21293000	2	6	5
SPBC2F12.14c|gua1|II|IMP	SPBC2F12.14c|gua1|II|IMP	10	10	10	>SPBC2F12.14c|gua1|II|IMP dehydrogenase Gua1	1	10	10	10	8	7	9	3	8	7	9	3	8	7	9	3	24.6	24.6	24.6	57.026	524	524	0	47.105	By MS/MS	By MS/MS	By MS/MS	By MS/MS	20.4	17.4	20.6	8.2	115690000	43736000	21726000	45713000	4517500	25103000	21241000	26719000	24646000	8	4	7
SPBC2G2.02|syj1|II|inositol-polyphosphate	SPBC2G2.02|syj1|II|inositol-polyphosphate	3	3	3	>SPBC2G2.02|syj1|II|inositol-polyphosphate 5-phosphatase (synaptojanin homolog 1)	1	3	3	3	0	1	0	2	0	1	0	2	0	1	0	2	3.1	3.1	3.1	121.82	1076	1076	0	14.896	By matching	By MS/MS	By matching	By MS/MS	0	0.9	0	2.1	1628500	0	1628500	0	0	0	1424900	0	0	0	1	0
SPBC2G2.04c|mmf1|II|mitochondrial	SPBC2G2.04c|mmf1|II|mitochondrial	3	3	3	>SPBC2G2.04c|mmf1|II|mitochondrial matrix protein, YjgF family protein Mmf1	1	3	3	3	1	1	0	2	1	1	0	2	1	1	0	2	15.4	15.4	15.4	17.543	162	162	0	9.1654	By MS/MS	By MS/MS	By matching	By MS/MS	6.2	8	0	15.4	6691700	1991100	3623000	0	1077500	1653300	0	0	0	1	1	0
SPBC2G2.11|myr1|II|N-myristoyltransferase	SPBC2G2.11|myr1|II|N-myristoyltransferase	2	2	2	>SPBC2G2.11|myr1|II|N-myristoyltransferase Myr1 (predicted)	1	2	2	2	2	2	2	2	2	2	2	2	2	2	2	2	3.4	3.4	3.4	53.696	466	466	0	4.94	By MS/MS	By MS/MS	By MS/MS	By MS/MS	3.4	3.4	3.4	3.4	18679000	5556400	4407900	2551500	6163100	4887600	3980100	0	5765900	2	2	2
SPBC2G2.12|hrs1|II|mitochondrial	SPBC2G2.12|hrs1|II|mitochondrial	3	3	3	>SPBC2G2.12|hrs1|II|mitochondrial and cytoplasmic histidine-tRNA ligase Hrs1 (predicted)	1	3	3	3	2	3	2	3	2	3	2	3	2	3	2	3	5.3	5.3	5.3	63.304	563	563	0	9.4924	By MS/MS	By MS/MS	By MS/MS	By MS/MS	4.1	5.3	4.1	5.3	32458000	6396500	8781900	8416800	8862900	5642500	8177100	7810300	7200400	2	2	1
SPBC2G2.13c|dcd1|II|deoxycytidylate	SPBC2G2.13c|dcd1|II|deoxycytidylate	5	5	5	>SPBC2G2.13c|dcd1|II|deoxycytidylate deaminase (predicted)	1	5	5	5	3	4	3	4	3	4	3	4	3	4	3	4	17.7	17.7	17.7	35.974	322	322	0	14.572	By MS/MS	By MS/MS	By MS/MS	By MS/MS	8.7	11.8	8.7	13.7	29064000	7413700	6494600	7412600	7742900	5867600	0	7655400	6515800	1	3	2
SPBC2G5.01|SPBC2G5.01|II|ER	SPBC2G5.01|SPBC2G5.01|II|ER	3	3	3	>SPBC2G5.01|SPBC2G5.01|II|ER protein involved in ER-nucleus signaling (predicted)	1	3	3	3	3	2	2	1	3	2	2	1	3	2	2	1	7.5	7.5	7.5	43.097	374	374	0	8.2119	By MS/MS	By MS/MS	By MS/MS	By MS/MS	7.5	5.6	5.6	2.7	26480000	8111400	7366900	7278700	3722500	6660800	6490600	6059000	0	3	1	2
SPBC2G5.05|SPBC2G5.05|II|transketolase	SPBC2G5.05|SPBC2G5.05|II|transketolase	31	31	31	>SPBC2G5.05|SPBC2G5.05|II|transketolase (predicted)	1	31	31	31	30	30	28	25	30	30	28	25	30	30	28	25	63.6	63.6	63.6	75.181	685	685	0	323.31	By MS/MS	By MS/MS	By MS/MS	By MS/MS	63.6	62.5	59.9	53.6	3387200000	743340000	1174000000	690120000	779770000	562100000	967020000	527600000	844360000	35	38	31
SPBC2G5.06c|hmt2|II|sulfide-quinone	SPBC2G5.06c|hmt2|II|sulfide-quinone	10	10	10	>SPBC2G5.06c|hmt2|II|sulfide-quinone oxidoreductase	1	10	10	10	6	8	7	9	6	8	7	9	6	8	7	9	30.1	30.1	30.1	51.574	459	459	0	37.827	By MS/MS	By MS/MS	By MS/MS	By MS/MS	17.4	21.4	19.2	28.5	185500000	38516000	47399000	53362000	46224000	37417000	42054000	40824000	41750000	6	6	6
SPBC30B4.03c|adn1|II|adhesion	SPBC30B4.03c|adn1|II|adhesion	1	1	1	>SPBC30B4.03c|adn1|II|adhesion defective protein	1	1	1	1	1	0	1	0	1	0	1	0	1	0	1	0	2.6	2.6	2.6	43.837	391	391	0	6.6568	By MS/MS	By matching	By MS/MS	By matching	2.6	0	2.6	0	5496500	5496500	0	0	0	4563900	0	0	0	1	0	1
SPBC30B4.04c|sol1|II|SWI/SNF	SPBC30B4.04c|sol1|II|SWI/SNF	6	6	6	>SPBC30B4.04c|sol1|II|SWI/SNF complex subunit Sol1	1	6	6	6	6	2	2	3	6	2	2	3	6	2	2	3	10.5	10.5	10.5	96.017	865	865	0	16.698	By MS/MS	By MS/MS	By MS/MS	By MS/MS	10.5	3.2	3.9	4.5	38378000	22922000	5958400	3064600	6433000	13201000	10111000	0	7368200	5	2	1
SPBC30B4.05|kap109|II|karyopherin	SPBC30B4.05|kap109|II|karyopherin	7	7	7	>SPBC30B4.05|kap109|II|karyopherin Kap109	1	7	7	7	4	5	3	2	4	5	3	2	4	5	3	2	8.8	8.8	8.8	109.42	967	967	0	22.562	By MS/MS	By MS/MS	By MS/MS	By MS/MS	6.4	4.8	3.2	2.1	38949000	13599000	14253000	7539200	3558300	7484900	11272000	7537800	7271500	4	5	2
SPBC30D10.03c|isn1|II|IMP	SPBC30D10.03c|isn1|II|IMP	2	2	2	>SPBC30D10.03c|isn1|II|IMP 5-nucleotidase Isn1 (predicted)	1	2	2	2	0	1	0	2	0	1	0	2	0	1	0	2	4	4	4	45.805	405	405	0	7.0839	By matching	By matching	By matching	By MS/MS	0	1.7	0	4	5022500	0	2140500	0	2882000	0	0	0	2882000	0	0	0
SPBC30D10.05c|SPBC30D10.05c|II|sepiapterin	SPBC30D10.05c|SPBC30D10.05c|II|sepiapterin	4	4	4	>SPBC30D10.05c|SPBC30D10.05c|II|sepiapterin reductase (predicted)	1	4	4	4	2	2	2	3	2	2	2	3	2	2	2	3	21.1	21.1	21.1	26.645	247	247	0	12.69	By MS/MS	By MS/MS	By MS/MS	By MS/MS	12.1	12.1	13.8	15.8	32309000	7787100	6129200	6821000	11572000	0	0	0	11572000	1	2	2
SPBC30D10.07c|bpl1|II|biotin-protein	SPBC30D10.07c|bpl1|II|biotin-protein	2	2	2	>SPBC30D10.07c|bpl1|II|biotin-protein ligase Bpl1 (predicted)	1	2	2	2	2	1	1	1	2	1	1	1	2	1	1	1	4.3	4.3	4.3	70.631	631	631	0	5.8	By MS/MS	By MS/MS	By MS/MS	By MS/MS	4.3	2.4	1.9	2.4	16521000	7050600	2842500	3973600	2654400	5854400	0	0	0	1	1	1
SPBC30D10.10c|tor1|II|serine/threonine	SPBC30D10.10c|tor1|II|serine/threonine	5	5	5	>SPBC30D10.10c|tor1|II|serine/threonine protein kinase Tor1	1	5	5	5	2	0	2	3	2	0	2	3	2	0	2	3	2.1	2.1	2.1	266.18	2335	2335	0	10.602	By MS/MS	By matching	By MS/MS	By MS/MS	0.9	0	0.9	1.3	4857200	1775100	0	1692300	1389800	0	0	1401800	0	2	0	2
SPBC30D10.13c|pdb1|II|pyruvate	SPBC30D10.13c|pdb1|II|pyruvate	5	5	5	>SPBC30D10.13c|pdb1|II|pyruvate dehydrogenase e1 component beta subunit Pdb1	1	5	5	5	3	3	2	3	3	3	2	3	3	3	2	3	26.2	26.2	26.2	39.623	366	366	0	20.523	By MS/MS	By MS/MS	By MS/MS	By MS/MS	14.2	15.8	8.2	14.5	54634000	15272000	20147000	10913000	8302100	11779000	13397000	9657600	12817000	1	2	2
SPBC30D10.18c|rpl102|II|60S	SPBC30D10.18c|rpl102|II|60S	4	1	1	>SPBC30D10.18c|rpl102|II|60S ribosomal protein L10a	1	4	1	1	4	3	4	3	1	1	1	1	1	1	1	1	26.4	10.2	10.2	23.884	216	216	0	8.256	By matching	By MS/MS	By MS/MS	By MS/MS	26.4	19.9	26.4	19.9	36305000	5615000	6005200	11764000	12921000	0	0	0	6646500	0	0	2
SPBC31A8.01c|rtn1|II|reticulon-like	SPBC31A8.01c|rtn1|II|reticulon-like	7	7	7	>SPBC31A8.01c|rtn1|II|reticulon-like protein Rtn1	1	7	7	7	7	6	6	5	7	6	6	5	7	6	6	5	30.2	30.2	30.2	33.659	308	308	0	129.88	By MS/MS	By MS/MS	By MS/MS	By MS/MS	30.2	27.9	27.9	24	670170000	165660000	202290000	154060000	148160000	127470000	160130000	134180000	168560000	10	9	6
SPBC31E1.02c|pmr1|II|P-type	SPBC31E1.02c|pmr1|II|P-type	2	2	2	>SPBC31E1.02c|pmr1|II|P-type ATPase, calcium transporting Pmr1	1	2	2	2	2	0	1	1	2	0	1	1	2	0	1	1	2.8	2.8	2.8	98.358	899	899	0	26.292	By MS/MS	By matching	By MS/MS	By MS/MS	2.8	0	2	0.8	5709200	1194000	0	3280400	1234700	0	0	2717200	0	1	0	1
SPBC31E1.05|gle1|II|RNA	SPBC31E1.05|gle1|II|RNA	2	2	2	>SPBC31E1.05|gle1|II|RNA export factor, cytoplasmic nucleoporin Gle1	1	2	2	2	1	1	0	0	1	1	0	0	1	1	0	0	4.6	4.6	4.6	56.294	480	480	0	11.693	By MS/MS	By MS/MS	By matching	By matching	2.7	1.9	0	0	0	0	0	0	0	0	0	0	0	1	1	0
SPBC31F10.04c|srb4|II|mediator	SPBC31F10.04c|srb4|II|mediator	1	1	1	>SPBC31F10.04c|srb4|II|mediator complex subunit Med17	1	1	1	1	0	0	1	1	0	0	1	1	0	0	1	1	2.6	2.6	2.6	62.479	545	545	0.0083397	2.1862	By matching	By matching	By matching	By MS/MS	0	0	2.6	2.6	3441100	0	0	1964900	1476200	0	0	0	1476200	0	0	0
SPBC31F10.06c|sar1|II|ADP-ribosylation	SPBC31F10.06c|sar1|II|ADP-ribosylation	8	8	8	>SPBC31F10.06c|sar1|II|ADP-ribosylation factor Sar1	1	8	8	8	6	4	5	5	6	4	5	5	6	4	5	5	52.6	52.6	52.6	21.28	190	190	0	47.632	By MS/MS	By MS/MS	By MS/MS	By MS/MS	37.4	21.6	30.5	33.2	152370000	48640000	39220000	39226000	25286000	29524000	34514000	31638000	32957000	6	4	4
SPBC31F10.13c|hip1|II|hira	SPBC31F10.13c|hip1|II|hira	6	6	6	>SPBC31F10.13c|hip1|II|hira protein, histone chaperone Hip1	1	6	6	6	5	4	1	4	5	4	1	4	5	4	1	4	8.9	8.9	8.9	103.69	932	932	0	18.834	By MS/MS	By MS/MS	By matching	By MS/MS	7.7	5.9	1.2	6.1	35360000	12844000	10246000	3576000	8694900	12018000	7132700	0	9173400	3	3	0
SPBC31F10.16|cfp1|II|ChAPs	SPBC31F10.16|cfp1|II|ChAPs	9	9	9	>SPBC31F10.16|cfp1|II|ChAPs family protein Cfp1	1	9	9	9	7	7	7	7	7	7	7	7	7	7	7	7	14	14	14	74.094	649	649	0	19.016	By MS/MS	By MS/MS	By MS/MS	By MS/MS	10.5	10.5	9.9	11.4	93378000	17680000	28227000	24990000	22481000	14794000	20126000	21056000	26584000	4	4	4
SPBC32C12.03c|ppk25|II|serine/threonine	SPBC32C12.03c|ppk25|II|serine/threonine	4	4	4	>SPBC32C12.03c|ppk25|II|serine/threonine protein kinase Ppk25 (predicted)	1	4	4	4	2	0	3	2	2	0	3	2	2	0	3	2	10.9	10.9	10.9	47.673	423	423	0	11.021	By MS/MS	By matching	By MS/MS	By MS/MS	5	0	8.3	5.9	12320000	5402200	0	5020800	1897200	4485600	0	0	0	1	0	3
SPBC32F12.02|rec14|II|Ski	SPBC32F12.02|rec14|II|Ski	2	2	2	>SPBC32F12.02|rec14|II|Ski complex subunit Rec14	1	2	2	2	0	2	0	2	0	2	0	2	0	2	0	2	10.6	10.6	10.6	32.935	302	302	0	6.6205	By matching	By matching	By matching	By MS/MS	0	10.6	0	10.6	8579300	0	3805000	0	4774300	0	3541900	0	4561800	0	0	0
SPBC32F12.03c|gpx1|II|glutathione	SPBC32F12.03c|gpx1|II|glutathione	3	3	3	>SPBC32F12.03c|gpx1|II|glutathione peroxidase Gpx1	1	3	3	3	3	2	1	2	3	2	1	2	3	2	1	2	23.4	23.4	23.4	18.06	158	158	0	8.0893	By MS/MS	By MS/MS	By MS/MS	By MS/MS	23.4	17.1	10.1	13.3	27155000	11612000	8666300	3218300	3659000	7636500	7723800	0	0	3	1	1
SPBC32F12.10|SPBC32F12.10|II|phosphoglucomutase	SPBC32F12.10|SPBC32F12.10|II|phosphoglucomutase	7	7	7	>SPBC32F12.10|SPBC32F12.10|II|phosphoglucomutase (predicted)	1	7	7	7	5	5	6	3	5	5	6	3	5	5	6	3	16.6	16.6	16.6	60.598	554	554	0	22.61	By MS/MS	By MS/MS	By MS/MS	By MS/MS	11.6	12.1	13.2	6.7	73223000	22079000	15779000	24830000	10535000	16995000	15949000	15197000	15100000	3	4	3
SPBC32F12.11|tdh1|II|glyceraldehyde-3-phosphate	SPBC32F12.11|tdh1|II|glyceraldehyde-3-phosphate	27	27	15	>SPBC32F12.11|tdh1|II|glyceraldehyde-3-phosphate dehydrogenase Tdh1	1	27	27	15	25	24	23	25	25	24	23	25	14	14	12	14	71.1	71.1	39.9	35.869	336	336	0	323.31	By MS/MS	By MS/MS	By MS/MS	By MS/MS	71.1	71.1	71.1	71.1	17269000000	5231800000	4630000000	4356900000	3050400000	3819400000	3636300000	3333500000	3128000000	55	47	46
SPBC32H8.03|bem46|II|esterase/lipase	SPBC32H8.03|bem46|II|esterase/lipase	2	2	2	>SPBC32H8.03|bem46|II|esterase/lipase (predicted)	1	2	2	2	1	1	2	2	1	1	2	2	1	1	2	2	8	8	8	33.133	299	299	0	7.5052	By MS/MS	By MS/MS	By MS/MS	By MS/MS	3.3	3.3	8	8	15633000	2540900	2635900	5658600	4798000	0	0	0	4798000	1	1	1
SPBC32H8.12c|act1|II|actin	SPBC32H8.12c|act1|II|actin	24	24	24	>SPBC32H8.12c|act1|II|actin Act1	1	24	24	24	22	20	19	18	22	20	19	18	22	20	19	18	74.1	74.1	74.1	41.764	375	375	0	323.31	By MS/MS	By MS/MS	By MS/MS	By MS/MS	72.3	71.5	72.8	62.7	6724700000	1693000000	1867200000	1732800000	1431600000	1234500000	1301300000	1227700000	1362100000	42	36	34
SPBC336.04|cdc6|II|DNA	SPBC336.04|cdc6|II|DNA	1	1	1	>SPBC336.04|cdc6|II|DNA polymerase delta catalytic subunit Cdc6	1	1	1	1	1	1	1	1	1	1	1	1	1	1	1	1	1.1	1.1	1.1	123.57	1086	1086	0.00081766	2.9407	By MS/MS	By matching	By matching	By MS/MS	1.1	1.1	1.1	1.1	8946600	1532200	3406500	2073000	1934900	0	0	0	1934900	1	0	0
SPBC336.10c|tif512|II|translation	SPBC336.10c|tif512|II|translation	2	1	1	>SPBC336.10c|tif512|II|translation elongation factor eIF5A (predicted)	1	2	1	1	2	1	1	1	1	0	0	0	1	0	0	0	17.8	10.7	10.7	18.563	169	169	0	3.9945	By MS/MS	By matching	By matching	By matching	17.8	7.1	7.1	7.1	0	0	0	0	0	0	0	0	0	1	0	0
SPBC337.05c|cct8|II|chaperonin-containing	SPBC337.05c|cct8|II|chaperonin-containing	13	13	13	>SPBC337.05c|cct8|II|chaperonin-containing T-complex theta subunit Cct8	1	13	13	13	10	8	12	11	10	8	12	11	10	8	12	11	30.4	30.4	30.4	59.955	546	546	0	74.848	By MS/MS	By MS/MS	By MS/MS	By MS/MS	22.5	20.7	27.5	26.9	280040000	71947000	69281000	78998000	59815000	67676000	65506000	56833000	55599000	10	8	11
SPBC337.09|erg28|II|Erg28	SPBC337.09|erg28|II|Erg28	1	1	1	>SPBC337.09|erg28|II|Erg28 protein (predicted)	1	1	1	1	0	1	0	1	0	1	0	1	0	1	0	1	10.3	10.3	10.3	15.252	136	136	0	3.8015	By matching	By MS/MS	By matching	By MS/MS	0	10.3	0	10.3	6427900	0	3366400	0	3061500	0	0	0	3061500	0	1	0
SPBC337.16|cho1|II|phosphatidyl-N-dimethylethanolamine	SPBC337.16|cho1|II|phosphatidyl-N-dimethylethanolamine	4	4	4	>SPBC337.16|cho1|II|phosphatidyl-N-dimethylethanolamine N-methyltransferase	1	4	4	4	4	3	4	2	4	3	4	2	4	3	4	2	17.6	17.6	17.6	24.767	221	221	0	18	By MS/MS	By MS/MS	By MS/MS	By MS/MS	17.6	17.6	17.6	13.6	62684000	20355000	12361000	18050000	11918000	0	0	12817000	14052000	3	1	3
SPBC342.02|qrs1|II|cytoplasmic	SPBC342.02|qrs1|II|cytoplasmic	2	2	2	>SPBC342.02|qrs1|II|cytoplasmic glutaminyl-tRNA ligase Qrs1 (predicted)	1	2	2	2	2	1	1	2	2	1	1	2	2	1	1	2	2.5	2.5	2.5	92.072	811	811	0	6.9339	By MS/MS	By MS/MS	By matching	By MS/MS	2.5	1	1	2.5	14041000	5474700	2919500	1518100	4128400	4411200	0	0	4262900	2	1	0
SPBC354.02c|sec61|II|translocon	SPBC354.02c|sec61|II|translocon	4	4	4	>SPBC354.02c|sec61|II|translocon alpha subunit Sec61	1	4	4	4	3	4	4	4	3	4	4	4	3	4	4	4	10.2	10.2	10.2	53.253	479	479	0	23.344	By MS/MS	By MS/MS	By MS/MS	By MS/MS	7.9	10.2	10.2	10.2	105630000	23584000	30524000	24675000	26845000	19978000	27565000	19719000	26312000	3	4	4
SPBC354.05c|sre2|II|membrane-tethered	SPBC354.05c|sre2|II|membrane-tethered	2	2	2	>SPBC354.05c|sre2|II|membrane-tethered transcription factor Sre2	1	2	2	2	0	1	0	1	0	1	0	1	0	1	0	1	5.3	5.3	5.3	86.833	793	793	0.0054222	2.3225	By matching	By MS/MS	By matching	By MS/MS	0	2.5	0	2.8	8394900	0	2999300	0	5395500	0	2624500	0	0	0	1	0
SPBC354.07c|SPBC354.07c|II|oxysterol	SPBC354.07c|SPBC354.07c|II|oxysterol	2	2	2	>SPBC354.07c|SPBC354.07c|II|oxysterol binding protein (predicted)	1	2	2	2	1	2	2	2	1	2	2	2	1	2	2	2	4.8	4.8	4.8	45.066	397	397	0	4.1107	By MS/MS	By MS/MS	By MS/MS	By MS/MS	2.8	4.8	4.8	4.8	26935000	8866500	4691100	7622400	5755300	0	0	0	5755300	0	1	1
SPBC354.12|gpd3|II|glyceraldehyde	SPBC354.12|gpd3|II|glyceraldehyde	14	2	2	>SPBC354.12|gpd3|II|glyceraldehyde 3-phosphate dehydrogenase Gpd3	1	14	2	2	13	11	12	12	2	1	1	1	2	1	1	1	41.8	8.1	8.1	35.674	335	335	0	5.2986	By MS/MS	By MS/MS	By MS/MS	By matching	41.8	37.9	37.9	37.9	33698000	12494000	7126200	8379500	5697600	0	0	0	5697600	1	0	1
SPBC354.14c|vac8|II|vacuolar	SPBC354.14c|vac8|II|vacuolar	2	2	2	>SPBC354.14c|vac8|II|vacuolar protein Vac8 (predicted)	1	2	2	2	1	1	1	1	1	1	1	1	1	1	1	1	5.1	5.1	5.1	60.232	550	550	0	5.5593	By MS/MS	By matching	By MS/MS	By MS/MS	2.2	2.2	2.9	2.2	4521100	1219900	1018900	2282200	0	0	0	1890400	0	1	0	1
SPBC359.02|alr2|II|alanine	SPBC359.02|alr2|II|alanine	5	5	5	>SPBC359.02|alr2|II|alanine racemase Alr2 (predicted)	1	5	5	5	5	3	3	3	5	3	3	3	5	3	3	3	14.9	14.9	14.9	41.147	370	370	0	15.084	By MS/MS	By MS/MS	By MS/MS	By MS/MS	14.9	10.3	12.7	10.3	68152000	23107000	14944000	17497000	12603000	15888000	13739000	16190000	13543000	4	1	3
SPBC359.03c|aat1|II|amino;SPAC869.11|cat1|I|cationic	SPBC359.03c|aat1|II|amino;SPAC869.11|cat1|I|cationic	5;3	5;3	4;2	>SPBC359.03c|aat1|II|amino acid transmembrane transporter Aat1;>SPAC869.11|cat1|I|cationic amino acid transmembrane transporter Cat1	2	5	5	4	4	3	4	3	4	3	4	3	3	2	3	2	7.9	7.9	6.4	63.259	579	579;587	0	11.201	By MS/MS	By MS/MS	By MS/MS	By MS/MS	6.6	5.2	6.6	5.5	70349000	19313000	14864000	12736000	23436000	0	0	0	23436000	2	1	3
SPBC36.03c|mfs3|II|MFS	SPBC36.03c|mfs3|II|MFS	3	3	3	>SPBC36.03c|mfs3|II|MFS family transmembrane transporter Mfs3	1	3	3	3	2	1	3	2	2	1	3	2	2	1	3	2	5.9	5.9	5.9	59.169	538	538	0	12.118	By MS/MS	By MS/MS	By MS/MS	By MS/MS	3.7	2	5.9	4.3	36079000	10739000	6253800	11589000	7497100	8944100	0	9572500	0	0	1	3
SPBC36.05c|clr6|II|histone	SPBC36.05c|clr6|II|histone	7	7	7	>SPBC36.05c|clr6|II|histone deacetylase (class I) Clr6	1	7	7	7	5	5	4	7	5	5	4	7	5	5	4	7	22.2	22.2	22.2	46.111	405	405	0	26.433	By MS/MS	By MS/MS	By MS/MS	By MS/MS	14.3	15.6	10.9	22.2	123790000	30338000	30637000	27790000	35029000	24036000	28395000	29108000	28508000	3	4	3
SPBC36.07|elp1|II|elongator	SPBC36.07|elp1|II|elongator	7	7	7	>SPBC36.07|elp1|II|elongator subunit Elp1 (predicted)	1	7	7	7	4	5	5	5	4	5	5	5	4	5	5	5	5.7	5.7	5.7	141.61	1253	1253	0	23.115	By MS/MS	By MS/MS	By MS/MS	By MS/MS	3.4	3.9	4.5	3.9	83787000	16044000	24226000	19037000	24480000	14269000	20339000	15333000	24827000	3	3	4
SPBC365.03c|rpl2101|II|60S	SPBC365.03c|rpl2101|II|60S	3	3	1	>SPBC365.03c|rpl2101|II|60S ribosomal protein L21 (predicted)	1	3	3	1	2	1	2	2	2	1	2	2	1	1	1	1	23.8	23.8	14.4	18.38	160	160	0	18.789	By MS/MS	By MS/MS	By matching	By MS/MS	19.4	14.4	19.4	18.8	148800000	38126000	37264000	43446000	29962000	0	0	35988000	0	1	1	0
SPBC365.08c|der1|II|Der1-like	SPBC365.08c|der1|II|Der1-like	1	1	1	>SPBC365.08c|der1|II|Der1-like (degradation in the ER) family (predicted)	1	1	1	1	0	0	1	0	0	0	1	0	0	0	1	0	3.1	3.1	3.1	25.112	224	224	0.0023715	2.5505	By matching	By matching	By MS/MS	By matching	0	0	3.1	0	2063200	0	0	2063200	0	0	0	1709000	0	0	0	1
SPBC365.14c|uge1|II|UDP-glucose	SPBC365.14c|uge1|II|UDP-glucose	2	2	2	>SPBC365.14c|uge1|II|UDP-glucose 4-epimerase Uge1	1	2	2	2	2	1	1	1	2	1	1	1	2	1	1	1	8.5	8.5	8.5	39.233	355	355	0	5.4196	By MS/MS	By matching	By matching	By matching	8.5	3.9	3.9	3.9	22993000	6421300	4774800	8111900	3685500	5331800	0	0	0	0	0	0
SPBC365.15|alp4|II|gamma	SPBC365.15|alp4|II|gamma	5	5	5	>SPBC365.15|alp4|II|gamma tubulin complex Spc97/GCP2 subunit Alp4	1	5	5	5	4	3	3	4	4	3	3	4	4	3	3	4	5.9	5.9	5.9	90.157	784	784	0	12.876	By MS/MS	By MS/MS	By MS/MS	By MS/MS	4.6	3.6	3.6	4.6	39027000	13823000	6295000	9147800	9761400	9036400	8825100	8100900	8362200	2	2	3
SPBC36B7.02|SPBC36B7.02|II|Svf1	SPBC36B7.02|SPBC36B7.02|II|Svf1	4	4	4	>SPBC36B7.02|SPBC36B7.02|II|Svf1 family protein Svf2	1	4	4	4	1	1	1	1	1	1	1	1	1	1	1	1	12.7	12.7	12.7	40.333	353	353	0	8.168	By MS/MS	By MS/MS	By MS/MS	By MS/MS	3.4	4	2.3	3.1	3092200	0	3092200	0	0	0	2705700	0	0	1	1	1
SPBC36B7.03|sec63|II|ER	SPBC36B7.03|sec63|II|ER	2	2	2	>SPBC36B7.03|sec63|II|ER protein translocation subcomplex subunit Sec63 (predicted)	1	2	2	2	1	1	1	0	1	1	1	0	1	1	1	0	5.9	5.9	5.9	69.725	611	611	0	5.0206	By MS/MS	By matching	By MS/MS	By matching	2.1	2.1	3.8	0	6100800	2776200	3324600	0	0	0	2909100	0	0	1	0	1
SPBC36B7.09|gcn2|II|eIF2	SPBC36B7.09|gcn2|II|eIF2	1	1	1	>SPBC36B7.09|gcn2|II|eIF2 alpha kinase Gcn2	1	1	1	1	0	0	0	1	0	0	0	1	0	0	0	1	1	1	1	181.19	1576	1576	0	3.1426	By matching	By matching	By matching	By MS/MS	0	0	0	1	1783100	0	0	0	1783100	0	0	0	1783100	0	0	0
SPBC3B8.03|lys9|II|saccharopine	SPBC3B8.03|lys9|II|saccharopine	12	12	12	>SPBC3B8.03|lys9|II|saccharopine dehydrogenase (predicted)	1	12	12	12	9	10	9	7	9	10	9	7	9	10	9	7	37.6	37.6	37.6	49.938	450	450	0	107.49	By MS/MS	By MS/MS	By MS/MS	By MS/MS	28	34.9	30.7	26.2	443270000	105620000	139210000	110450000	87995000	82075000	111040000	78883000	108650000	7	12	10
SPBC3B8.06|SPBC3B8.06|II|conserved	SPBC3B8.06|SPBC3B8.06|II|conserved	1	1	1	>SPBC3B8.06|SPBC3B8.06|II|conserved fungal protein	1	1	1	1	1	1	1	1	1	1	1	1	1	1	1	1	3.5	3.5	3.5	57.703	511	511	0	4.3638	By matching	By MS/MS	By MS/MS	By MS/MS	3.5	3.5	3.5	3.5	19021000	5359500	5345900	3168700	5147400	0	0	0	5147400	0	1	0
SPBC3B8.07c|dsd1|II|dihydroceramide	SPBC3B8.07c|dsd1|II|dihydroceramide	1	1	1	>SPBC3B8.07c|dsd1|II|dihydroceramide delta-4 desaturase	1	1	1	1	1	1	1	1	1	1	1	1	1	1	1	1	3.3	3.3	3.3	41.81	362	362	0	4.1939	By MS/MS	By MS/MS	By MS/MS	By MS/MS	3.3	3.3	3.3	3.3	26946000	5736900	6769400	5176400	9263000	0	0	0	9263000	0	0	0
SPBC3B9.01|fes1|II|Hsp70	SPBC3B9.01|fes1|II|Hsp70	2	2	2	>SPBC3B9.01|fes1|II|Hsp70 nucleotide exchange factor Fes1 (predicted)	1	2	2	2	1	2	1	2	1	2	1	2	1	2	1	2	5.9	5.9	5.9	32.744	287	287	0	4.0858	By matching	By MS/MS	By MS/MS	By MS/MS	3.5	5.9	2.4	5.9	9765500	2409100	3517600	0	3838900	0	0	0	3838900	0	1	1
SPBC3B9.03|srp101|II|signal	SPBC3B9.03|srp101|II|signal	2	2	2	>SPBC3B9.03|srp101|II|signal recognition particle receptor alpha subunit Srp101 (predicted)	1	2	2	2	2	2	1	1	2	2	1	1	2	2	1	1	4.8	4.8	4.8	61.077	547	547	0	7.891	By MS/MS	By MS/MS	By MS/MS	By matching	4.8	4.8	3.3	3.3	22046000	6238800	6640300	3919800	5246600	5180300	0	0	0	1	1	0
SPBC3B9.08c|mnh1|II|Mago-nashi	SPBC3B9.08c|mnh1|II|Mago-nashi	1	1	1	>SPBC3B9.08c|mnh1|II|Mago-nashi homolog Mnh1 (predicted)	1	1	1	1	0	0	0	1	0	0	0	1	0	0	0	1	11.6	11.6	11.6	17.267	147	147	0	3.9288	By matching	By matching	By matching	By MS/MS	0	0	0	11.6	3269600	0	0	0	3269600	0	0	0	3269600	0	0	0
SPBC3B9.16c|nup120|II|nucleoporin	SPBC3B9.16c|nup120|II|nucleoporin	5	5	5	>SPBC3B9.16c|nup120|II|nucleoporin Nup120	1	5	5	5	5	3	2	2	5	3	2	2	5	3	2	2	4	4	4	129.78	1136	1136	0	12.659	By MS/MS	By MS/MS	By MS/MS	By MS/MS	4	2.6	1.7	1.5	34520000	14640000	10285000	5331600	4262500	8400400	7287500	6480900	7665900	3	2	1
SPBC3B9.19|mge1|II|mitochondrial	SPBC3B9.19|mge1|II|mitochondrial	2	2	2	>SPBC3B9.19|mge1|II|mitochondrial GrpE domain chaperone protein (predicted)	1	2	2	2	1	1	0	1	1	1	0	1	1	1	0	1	8.1	8.1	8.1	25.334	223	223	0	4.9262	By MS/MS	By matching	By matching	By MS/MS	4.9	3.1	0	3.1	3939700	0	1546100	0	2393600	0	0	0	2393600	1	0	0
SPBC3D6.02|but2|II|But2	SPBC3D6.02|but2|II|But2	3	3	3	>SPBC3D6.02|but2|II|But2 family protein But2	1	3	3	3	1	2	3	1	1	2	3	1	1	2	3	1	10	10	10	43.625	390	390	0	8.7961	By MS/MS	By MS/MS	By MS/MS	By matching	2.3	6.2	10	2.3	30339000	3530100	6534400	16710000	3564700	0	8569500	10989000	0	1	1	3
SPBC3D6.05|ptp4|II|phosphatidate	SPBC3D6.05|ptp4|II|phosphatidate	1	1	1	>SPBC3D6.05|ptp4|II|phosphatidate cytidylyltransferase Ptp4 (predicted)	1	1	1	1	1	1	1	1	1	1	1	1	1	1	1	1	3.7	3.7	3.7	24.397	218	218	0	3.2301	By MS/MS	By MS/MS	By MS/MS	By MS/MS	3.7	3.7	3.7	3.7	12875000	3398600	3278500	3189300	3008800	0	0	0	3008800	1	1	1
SPBC3D6.06c|prs5|II|ribose-phosphate	SPBC3D6.06c|prs5|II|ribose-phosphate	2	2	2	>SPBC3D6.06c|prs5|II|ribose-phosphate pyrophosphokinase Prs5 (predicted)	1	2	2	2	2	2	2	2	2	2	2	2	2	2	2	2	8.5	8.5	8.5	37.338	341	341	0	6.3247	By MS/MS	By MS/MS	By MS/MS	By matching	8.5	8.5	8.5	8.5	26130000	7736800	6098300	6586900	5707700	5937800	5604700	5556300	5825200	1	1	2
SPBC3D6.12|dip2|II|U3	SPBC3D6.12|dip2|II|U3	6	6	6	>SPBC3D6.12|dip2|II|U3 snoRNA associated protein Dip2 (predicted)	1	6	6	6	1	3	3	4	1	3	3	4	1	3	3	4	7.3	7.3	7.3	103.43	922	922	0	11.862	By matching	By MS/MS	By MS/MS	By MS/MS	1.3	3.5	3.1	5.1	17185000	2413700	6444600	4303500	4023100	0	0	0	4023100	0	3	2
SPBC3E7.05c|mic60|II|MICOS	SPBC3E7.05c|mic60|II|MICOS	4	4	4	>SPBC3E7.05c|mic60|II|MICOS complex subunit Mic60 (predicted)	1	4	4	4	3	0	2	0	3	0	2	0	3	0	2	0	8.9	8.9	8.9	63.214	550	550	0	7.0548	By MS/MS	By matching	By MS/MS	By matching	7.5	0	4.5	0	18439000	13812000	0	4626800	0	11469000	0	0	0	2	0	2
SPBC3E7.10|fma1|II|methionine	SPBC3E7.10|fma1|II|methionine	8	8	8	>SPBC3E7.10|fma1|II|methionine aminopeptidase Fma1 (predicted)	1	8	8	8	5	5	5	5	5	5	5	5	5	5	5	5	30.9	30.9	30.9	42.139	379	379	0	67.674	By MS/MS	By MS/MS	By MS/MS	By MS/MS	24.5	24.5	19.5	25.6	158300000	42481000	42474000	32866000	40475000	35930000	38276000	27942000	37989000	4	6	5
SPBC3E7.15c|lac1|II|sphingosine	SPBC3E7.15c|lac1|II|sphingosine	2	2	2	>SPBC3E7.15c|lac1|II|sphingosine N-acyltransferase Lac1	1	2	2	2	2	2	2	2	2	2	2	2	2	2	2	2	9.6	9.6	9.6	45.335	384	384	0	9.313	By MS/MS	By MS/MS	By MS/MS	By matching	9.6	9.6	9.6	9.6	50672000	12380000	16633000	8159000	13499000	10089000	14331000	8563200	12108000	1	2	1
SPBC3E7.16c|leu3|II|2-isopropylmalate	SPBC3E7.16c|leu3|II|2-isopropylmalate	8	8	8	>SPBC3E7.16c|leu3|II|2-isopropylmalate synthase Leu3	1	8	8	8	6	4	5	4	6	4	5	4	6	4	5	4	21.6	21.6	21.6	64.041	584	584	0	44.717	By MS/MS	By MS/MS	By MS/MS	By MS/MS	17	11.1	10.4	11.5	124290000	28511000	48459000	20799000	26518000	23219000	33370000	22900000	30334000	2	4	4
SPBC3F6.02c|erg26|II|3	SPBC3F6.02c|erg26|II|3	5	5	5	>SPBC3F6.02c|erg26|II|3 beta-hydroxysteroid dehydrogenase/delta 5-->4-isomerase Erg26 (predicted)	1	5	5	5	4	5	4	5	4	5	4	5	4	5	4	5	16.2	16.2	16.2	38.317	340	340	0	28.404	By MS/MS	By MS/MS	By MS/MS	By MS/MS	13.2	16.2	12.6	16.2	120160000	21758000	36190000	27165000	35042000	21428000	31279000	25201000	29369000	5	8	2
SPBC3F6.03|trr1|II|thioredoxin	SPBC3F6.03|trr1|II|thioredoxin	2	2	2	>SPBC3F6.03|trr1|II|thioredoxin reductase Trr1	1	2	2	2	1	2	1	2	1	2	1	2	1	2	1	2	9.6	9.6	9.6	34.618	322	322	0	14.342	By MS/MS	By MS/MS	By MS/MS	By MS/MS	3.7	9.6	3.7	9.6	21028000	2217300	6879500	5486100	6445100	0	6026400	0	6438300	1	2	1
SPBC3H7.01|spo14|II|GDP/GTP	SPBC3H7.01|spo14|II|GDP/GTP	2	2	2	>SPBC3H7.01|spo14|II|GDP/GTP exchange factor, WD repeat protein Spo14	1	2	2	2	1	2	1	1	1	2	1	1	1	2	1	1	6.1	6.1	6.1	45.077	395	395	0	6.9994	By MS/MS	By MS/MS	By MS/MS	By MS/MS	3.5	6.1	3.5	3.5	11460000	3312000	4050800	2786700	1310300	0	3544500	0	0	1	2	1
SPBC3H7.03c|kgd1|II|2-oxoglutarate	SPBC3H7.03c|kgd1|II|2-oxoglutarate	27	27	27	>SPBC3H7.03c|kgd1|II|2-oxoglutarate dehydrogenase (lipoamide) (e1 component of oxoglutarate dehydrogenase complex) (predicted)	1	27	27	27	25	24	25	21	25	24	25	21	25	24	25	21	39.8	39.8	39.8	114.16	1009	1009	0	253.26	By MS/MS	By MS/MS	By MS/MS	By MS/MS	37.1	34.6	38.5	31.7	1256000000	331990000	315550000	282400000	326110000	247690000	267100000	236140000	298450000	31	26	26
SPBC3H7.06c|pof9|II|F-box	SPBC3H7.06c|pof9|II|F-box	3	3	3	>SPBC3H7.06c|pof9|II|F-box protein Pof9	1	3	3	3	3	1	2	0	3	1	2	0	3	1	2	0	11.3	11.3	11.3	52.419	467	467	0	9.6166	By MS/MS	By MS/MS	By MS/MS	By matching	11.3	3.2	7.9	0	15529000	7761500	4041900	3726000	0	6444600	0	0	0	1	2	2
SPBC3H7.15|hhp1|II|serine/threonine;SPBP35G2.05c|cki2|II|serine/threonine;SPBC1347.06c|cki1|II|serine/threonine	SPBC3H7.15|hhp1|II|serine/threonine	10;1;1	9;1;1	8;0;0	>SPBC3H7.15|hhp1|II|serine/threonine protein kinase Hhp1	3	10	9	8	8	8	7	5	7	7	6	4	7	6	6	3	28.2	24.9	22.5	42.45	365	365;435;446	0	28.544	By MS/MS	By MS/MS	By MS/MS	By MS/MS	21.9	22.5	20.8	16.4	162830000	51842000	44814000	35261000	30911000	38144000	25836000	33536000	28678000	7	5	7
SPBC4.03c|SPBC4.03c|II|COPII-coated	SPBC4.03c|SPBC4.03c|II|COPII-coated	3	3	3	>SPBC4.03c|SPBC4.03c|II|COPII-coated vesicle component Sfb3 (predicted)	1	3	3	3	1	2	3	2	1	2	3	2	1	2	3	2	3.8	3.8	3.8	98.068	891	891	0	8.342	By MS/MS	By MS/MS	By MS/MS	By MS/MS	0.8	2.4	3.8	2.4	67378000	16502000	16730000	19907000	14238000	0	14461000	14372000	16534000	1	1	2
SPBC4.05|mlo2|II|ubiquitin	SPBC4.05|mlo2|II|ubiquitin	1	1	1	>SPBC4.05|mlo2|II|ubiquitin protein ligase E3 component human N-recognin 7 homolog Mlo2	1	1	1	1	1	1	1	1	1	1	1	1	1	1	1	1	2.1	2.1	2.1	38.078	329	329	0.0054138	2.3138	By MS/MS	By matching	By MS/MS	By matching	2.1	2.1	2.1	2.1	39211000	10966000	10908000	10480000	6857400	0	0	0	6857400	1	0	1
SPBC4.06|SPBC4.06|II|acid	SPBC4.06|SPBC4.06|II|acid	2	2	2	>SPBC4.06|SPBC4.06|II|acid phosphatase (predicted)	1	2	2	2	0	1	1	1	0	1	1	1	0	1	1	1	3.5	3.5	3.5	51.975	462	462	0	4.5261	By matching	By MS/MS	By matching	By MS/MS	0	1.9	1.9	1.5	7783600	0	2784100	3473200	1526300	0	0	2877000	0	0	1	0
SPBC4.07c|rpt2|II|19S	SPBC4.07c|rpt2|II|19S	6	6	6	>SPBC4.07c|rpt2|II|19S proteasome regulatory subunit Rpt2	1	6	6	6	3	5	4	5	3	5	4	5	3	5	4	5	16.7	16.7	16.7	50.06	448	448	0	24.233	By MS/MS	By MS/MS	By MS/MS	By MS/MS	7.4	14.7	10	12.9	75017000	6802400	25581000	16752000	25882000	0	0	16288000	23470000	1	1	2
SPBC405.01|ade1|II|phosphoribosylamine-glycine	SPBC405.01|ade1|II|phosphoribosylamine-glycine	11	11	11	>SPBC405.01|ade1|II|phosphoribosylamine-glycine ligase/phosphoribosylformylglycinamidine cyclo-ligase	1	11	11	11	7	10	10	9	7	10	10	9	7	10	10	9	19.7	19.7	19.7	85.23	788	788	0	43.612	By MS/MS	By MS/MS	By MS/MS	By MS/MS	10.9	16.2	18.3	17.1	164580000	25595000	52029000	43299000	43658000	27390000	39827000	34132000	44953000	2	10	8
SPCC970.05|rpl3601|III|60S;SPBC405.07|rpl3602|II|60S	SPCC970.05|rpl3601|III|60S;SPBC405.07|rpl3602|II|60S	2;2	2;2	2;2	>SPCC970.05|rpl3601|III|60S ribosomal protein L36;>SPBC405.07|rpl3602|II|60S ribosomal protein L36	2	2	2	2	2	0	1	0	2	0	1	0	2	0	1	0	22.2	22.2	22.2	11.263	99	99;99	0	5.6138	By MS/MS	By matching	By matching	By matching	22.2	0	10.1	0	6747600	4297400	0	2450200	0	3568300	0	0	0	1	0	0
SPBC409.18|SPBC409.18|II|phosphatidic	SPBC409.18|SPBC409.18|II|phosphatidic	1	1	1	>SPBC409.18|SPBC409.18|II|phosphatidic acid phosphatase (predicted)	1	1	1	1	1	1	0	1	1	1	0	1	1	1	0	1	2.9	2.9	2.9	31.192	279	279	0.0053929	2.2844	By matching	By MS/MS	By matching	By MS/MS	2.9	2.9	0	2.9	11000000	3017300	3562500	0	4420200	0	0	0	4420200	0	1	0
SPBC409.20c|psh3|II|ER	SPBC409.20c|psh3|II|ER	2	2	2	>SPBC409.20c|psh3|II|ER chaperone SHR3 homologue Psh3	1	2	2	2	2	1	1	1	2	1	1	1	2	1	1	1	14	14	14	24.06	215	215	0	13.006	By MS/MS	By MS/MS	By MS/MS	By MS/MS	14	4.2	4.2	4.2	69263000	19630000	18221000	15559000	15853000	16299000	0	0	0	1	0	0
SPBC418.01c|his4|II|imidazoleglycerol-phosphate	SPBC418.01c|his4|II|imidazoleglycerol-phosphate	7	7	7	>SPBC418.01c|his4|II|imidazoleglycerol-phosphate synthase (predicted)	1	7	7	7	5	6	4	4	5	6	4	4	5	6	4	4	14.6	14.6	14.6	59.399	541	541	0	20.042	By MS/MS	By MS/MS	By MS/MS	By MS/MS	10	12.9	8.1	8.3	68715000	18092000	22873000	9017700	18732000	13629000	13869000	12628000	21112000	4	5	2
SPBC428.02c|eca39|II|branched	SPBC428.02c|eca39|II|branched	8	8	8	>SPBC428.02c|eca39|II|branched chain amino acid aminotransferase Eca39	1	8	8	8	8	6	6	7	8	6	6	7	8	6	6	7	23.2	23.2	23.2	47.855	427	427	0	26.232	By MS/MS	By MS/MS	By MS/MS	By MS/MS	23.2	15.2	16.9	21.3	200660000	50897000	65166000	27540000	57058000	32771000	58031000	27507000	60843000	5	5	4
SPBC428.03c|pho4|II|thiamine-repressible	SPBC428.03c|pho4|II|thiamine-repressible	2	2	2	>SPBC428.03c|pho4|II|thiamine-repressible acid phosphatase Pho4	1	2	2	2	1	1	1	2	1	1	1	2	1	1	1	2	3.2	3.2	3.2	52.118	463	463	0	3.976	By matching	By matching	By MS/MS	By MS/MS	1.5	1.5	1.5	3.2	11680000	4374000	2234900	1672500	3398700	0	0	0	3398700	0	0	1
SPBC428.05c|arg12|II|argininosuccinate	SPBC428.05c|arg12|II|argininosuccinate	6	6	6	>SPBC428.05c|arg12|II|argininosuccinate synthase Arg12	1	6	6	6	6	5	4	4	6	5	4	4	6	5	4	4	19	19	19	46.084	410	410	0	22.126	By MS/MS	By MS/MS	By MS/MS	By MS/MS	19	16.8	12.4	13.2	190920000	53001000	66876000	40626000	30414000	38304000	57419000	33667000	37202000	5	6	3
SPBC428.11|met17|II|homocysteine	SPBC428.11|met17|II|homocysteine	11	11	11	>SPBC428.11|met17|II|homocysteine synthase Met17	1	11	11	11	5	10	6	6	5	10	6	6	5	10	6	6	46.6	46.6	46.6	46.408	429	429	0	89.775	By MS/MS	By MS/MS	By MS/MS	By MS/MS	18.6	42.9	22.4	22.1	232260000	40043000	86991000	47580000	57650000	39984000	65654000	45484000	55307000	4	11	5
SPBC428.14|SPBC428.14|II|1-acylglycerol-3-phosphate	SPBC428.14|SPBC428.14|II|1-acylglycerol-3-phosphate	5	5	5	>SPBC428.14|SPBC428.14|II|1-acylglycerol-3-phosphate acyltransferase (predicted)	1	5	5	5	3	5	3	2	3	5	3	2	3	5	3	2	12.6	12.6	12.6	41.354	350	350	0	20.869	By MS/MS	By MS/MS	By MS/MS	By MS/MS	10.6	12.6	10	4.9	33261000	8382800	8127300	10305000	6446700	0	0	8535600	0	2	4	2
SPBC428.16c|rhb1|II|Rheb	SPBC428.16c|rhb1|II|Rheb	1	1	1	>SPBC428.16c|rhb1|II|Rheb GTPase Rhb1	1	1	1	1	1	1	1	1	1	1	1	1	1	1	1	1	5.9	5.9	5.9	20.515	185	185	0	6.5632	By matching	By MS/MS	By matching	By MS/MS	5.9	5.9	5.9	5.9	13386000	2380800	5110000	2152100	3743100	0	0	0	3743100	0	1	0
SPBC428.20c|alp6|II|gamma	SPBC428.20c|alp6|II|gamma	1	1	1	>SPBC428.20c|alp6|II|gamma tubulin complex Spc98/GCP3 subunit Alp6	1	1	1	1	1	1	0	0	1	1	0	0	1	1	0	0	1.6	1.6	1.6	95.996	832	832	0.00082169	3.0371	By MS/MS	By MS/MS	By matching	By matching	1.6	1.6	0	0	0	0	0	0	0	0	0	0	0	1	1	0
SPBC460.02c|SPBC460.02c|AB325691|eukaryotic	SPBC460.02c|SPBC460.02c|AB325691|eukaryotic	1	1	1	>SPBC460.02c|SPBC460.02c|AB325691|eukaryotic translation elongation factor, glutathione S-transferase (predicted)	1	1	1	1	0	1	0	1	0	1	0	1	0	1	0	1	4.1	4.1	4.1	25.717	220	220	0	4.9928	By matching	By MS/MS	By matching	By MS/MS	0	4.1	0	4.1	8217600	0	2820800	0	5396800	0	0	0	5396800	0	1	0
SPBC4B4.01c|ptk1|II|fumble	SPBC4B4.01c|ptk1|II|fumble	1	1	1	>SPBC4B4.01c|ptk1|II|fumble family pantothenate kinase (predicted)	1	1	1	1	0	1	0	1	0	1	0	1	0	1	0	1	3	3	3	44.861	403	403	0	3.3857	By matching	By matching	By matching	By MS/MS	0	3	0	3	3457100	0	1658100	0	1799000	0	0	0	1799000	0	0	0
SPBC4B4.03|rsc1|II|RSC	SPBC4B4.03|rsc1|II|RSC	2	2	2	>SPBC4B4.03|rsc1|II|RSC complex subunit Rsc1	1	2	2	2	2	2	2	2	2	2	2	2	2	2	2	2	2.5	2.5	2.5	90.131	803	803	0	4.5354	By MS/MS	By MS/MS	By MS/MS	By MS/MS	2.5	2.5	2.5	2.5	18939000	3812700	4941300	5486800	4697800	3632300	4539200	4215600	4345200	1	2	1
SPBC4B4.04|eif21|II|translation	SPBC4B4.04|eif21|II|translation	1	1	1	>SPBC4B4.04|eif21|II|translation initiation factor eIF2A (predicted)	1	1	1	1	0	1	1	1	0	1	1	1	0	1	1	1	1.7	1.7	1.7	63.496	576	576	0.0097965	2.1229	By matching	By MS/MS	By MS/MS	By MS/MS	0	1.7	1.7	1.7	5066300	0	0	2889700	2176600	0	0	0	2176600	0	1	2
SPBC4B4.08|ght2|II|hexose	SPBC4B4.08|ght2|II|hexose	3	3	3	>SPBC4B4.08|ght2|II|hexose transmembrane transporter Ght2	1	3	3	3	2	3	2	2	2	3	2	2	2	3	2	2	7.3	7.3	7.3	58.845	531	531	0	16.798	By MS/MS	By MS/MS	By MS/MS	By MS/MS	7.3	7.3	7.3	7.3	95849000	26288000	27873000	25746000	15941000	22099000	24349000	21469000	15566000	2	3	2
SPBC4B4.09|usp105|II|U1	SPBC4B4.09|usp105|II|U1	7	7	7	>SPBC4B4.09|usp105|II|U1 snRNP-associated protein Usp105	1	7	7	7	5	7	3	4	5	7	3	4	5	7	3	4	13.4	13.4	13.4	71.246	612	612	0	20.913	By MS/MS	By MS/MS	By MS/MS	By MS/MS	9	13.4	4.4	7.4	255280000	73765000	59126000	77687000	44698000	61822000	59202000	53685000	47326000	5	5	2
SPBC4C3.05c|nuc1|II|DNA-directed	SPBC4C3.05c|nuc1|II|DNA-directed	22	22	21	>SPBC4C3.05c|nuc1|II|DNA-directed RNA polymerase I complex large subunit Nuc1	1	22	22	21	12	19	15	15	12	19	15	15	11	19	14	15	19.1	19.1	18.5	189.24	1689	1689	0	80.061	By MS/MS	By MS/MS	By MS/MS	By MS/MS	10.1	16.2	13	12.6	267730000	43931000	107670000	51446000	64690000	43346000	74237000	46221000	74187000	8	19	11
SPBC4C3.07|eif6|II|translation	SPBC4C3.07|eif6|II|translation	8	8	8	>SPBC4C3.07|eif6|II|translation initiation factor eIF3f	1	8	8	8	7	8	7	7	7	8	7	7	7	8	7	7	34.8	34.8	34.8	33.251	302	302	0	75.219	By MS/MS	By MS/MS	By MS/MS	By MS/MS	29.8	34.8	29.8	29.8	327130000	55903000	99284000	69880000	102060000	60786000	83974000	62050000	86425000	7	9	6
SPBC4C3.09|SPBC4C3.09|II|acetylglucosaminyltransferase	SPBC4C3.09|SPBC4C3.09|II|acetylglucosaminyltransferase	1	1	1	>SPBC4C3.09|SPBC4C3.09|II|acetylglucosaminyltransferase (predicted)	1	1	1	1	1	1	1	0	1	1	1	0	1	1	1	0	2.1	2.1	2.1	44.095	376	376	0.0054054	2.3052	By matching	By matching	By MS/MS	By matching	2.1	2.1	2.1	0	6931300	2191000	2855300	1885000	0	0	0	1561400	0	0	0	1
SPBC4C3.10c|pre3|II|20S	SPBC4C3.10c|pre3|II|20S	1	1	1	>SPBC4C3.10c|pre3|II|20S proteasome complex subunit beta 1 Pre3 (predicted)	1	1	1	1	1	0	0	1	1	0	0	1	1	0	0	1	7.1	7.1	7.1	24.564	226	226	0	10.228	By MS/MS	By matching	By matching	By MS/MS	7.1	0	0	7.1	4674500	4674500	0	0	0	3881300	0	0	0	2	0	0
SPBC4F6.05c|SPBC4F6.05c|II|lectin	SPBC4F6.05c|SPBC4F6.05c|II|lectin	1	1	1	>SPBC4F6.05c|SPBC4F6.05c|II|lectin family glycoprotein receptor (predicted)	1	1	1	1	0	0	0	1	0	0	0	1	0	0	0	1	2.3	2.3	2.3	42.768	384	384	0.00081367	2.9125	By matching	By matching	By matching	By MS/MS	0	0	0	2.3	2559300	0	0	0	2559300	0	0	0	2559300	0	0	0
SPBC4F6.06|kin1|II|microtubule	SPBC4F6.06|kin1|II|microtubule	1	1	1	>SPBC4F6.06|kin1|II|microtubule affinity-regulating kinase Kin1	1	1	1	1	1	1	1	1	1	1	1	1	1	1	1	1	1.5	1.5	1.5	98.748	891	891	0.0076511	2.2376	By matching	By matching	By MS/MS	By MS/MS	1.5	1.5	1.5	1.5	14024000	2879900	4702700	2843400	3597800	0	0	0	3597800	0	0	0
SPBC4F6.07c|mak5|II|ATP-dependent	SPBC4F6.07c|mak5|II|ATP-dependent	4	4	4	>SPBC4F6.07c|mak5|II|ATP-dependent RNA helicase Mak5 (predicted)	1	4	4	4	2	2	2	2	2	2	2	2	2	2	2	2	7.1	7.1	7.1	73.249	648	648	0	11.875	By MS/MS	By MS/MS	By MS/MS	By MS/MS	3.5	3.4	3.5	3.7	12217000	1247200	2970000	0	8000200	0	0	0	8000200	2	2	2
SPBC4F6.17c|SPBC4F6.17c|II|mitochondrial	SPBC4F6.17c|SPBC4F6.17c|II|mitochondrial	3	3	3	>SPBC4F6.17c|SPBC4F6.17c|II|mitochondrial heatshock protein Hsp78 (predicted)	1	3	3	3	2	1	2	2	2	1	2	2	2	1	2	2	6	6	6	90.153	803	803	0	5.2011	By MS/MS	By MS/MS	By MS/MS	By matching	4.7	1.9	3.1	4.7	44884000	15005000	7319700	13144000	9416100	0	0	0	9416100	2	1	0
SPBC4F6.18c|arf1|II|ADP-ribosylation	SPBC4F6.18c|arf1|II|ADP-ribosylation	10	10	10	>SPBC4F6.18c|arf1|II|ADP-ribosylation factor, Arf family Arf1	1	10	10	10	7	5	9	4	7	5	9	4	7	5	9	4	65.6	65.6	65.6	20.618	180	180	0	54.699	By MS/MS	By MS/MS	By MS/MS	By MS/MS	52.2	35	64.4	35.6	170980000	46354000	37361000	42642000	44624000	33918000	37304000	34064000	35747000	5	7	10
SPBC530.03c|bag102|II|BAG	SPBC530.03c|bag102|II|BAG	1	1	1	>SPBC530.03c|bag102|II|BAG family molecular chaperone regulator Bag102	1	1	1	1	0	1	1	0	0	1	1	0	0	1	1	0	10.2	10.2	10.2	23.325	206	206	0	6.6561	By matching	By MS/MS	By MS/MS	By matching	0	10.2	10.2	0	10075000	0	1891100	8183500	0	0	0	4671600	0	0	1	2
SPBC530.05|prt1|II|transcription	SPBC530.05|prt1|II|transcription	3	3	3	>SPBC530.05|prt1|II|transcription factor (predicted)	1	3	3	3	1	3	1	3	1	3	1	3	1	3	1	3	5.9	5.9	5.9	85.198	762	762	0	8.832	By matching	By MS/MS	By matching	By MS/MS	2.6	5.9	2.1	5.9	22976000	3562800	7505300	2794400	9113000	0	5428800	0	10251000	0	0	0
SPBC530.07c|SPBC530.07c|II|TENA/THI	SPBC530.07c|SPBC530.07c|II|TENA/THI	11	11	11	>SPBC530.07c|SPBC530.07c|II|TENA/THI family protein	1	11	11	11	9	7	9	6	9	7	9	6	9	7	9	6	40.5	40.5	40.5	27.839	242	242	0	78.247	By MS/MS	By MS/MS	By MS/MS	By MS/MS	36	33.1	39.7	27.7	246230000	66535000	62017000	62746000	54933000	54965000	53531000	55301000	52621000	7	5	6
SPBC530.10c|anc1|II|mitochondrial	SPBC530.10c|anc1|II|mitochondrial	8	8	8	>SPBC530.10c|anc1|II|mitochondrial adenine nucleotide carrier Anc1	1	8	8	8	7	6	7	6	7	6	7	6	7	6	7	6	30.4	30.4	30.4	35.02	322	322	0	90.591	By MS/MS	By MS/MS	By MS/MS	By MS/MS	26.1	23.6	26.1	24.5	382680000	109560000	89695000	112590000	70828000	93072000	77597000	90425000	68990000	5	5	6
SPBC530.14c|dsk1|II|SR	SPBC530.14c|dsk1|II|SR	3	3	3	>SPBC530.14c|dsk1|II|SR protein-specific kinase Dsk1	1	3	3	3	1	0	1	1	1	0	1	1	1	0	1	1	8.3	8.3	8.3	61.055	544	544	0	12.334	By MS/MS	By matching	By MS/MS	By MS/MS	2.2	0	2.9	3.1	1381500	0	0	1381500	0	0	0	1144300	0	1	0	1
SPBC543.02c|SPBC543.02c|II|DNAJ/TPR	SPBC543.02c|SPBC543.02c|II|DNAJ/TPR	5	5	5	>SPBC543.02c|SPBC543.02c|II|DNAJ/TPR domain protein DNAJC7 family	1	5	5	5	2	2	3	3	2	2	3	3	2	2	3	3	14.9	14.9	14.9	53.304	476	476	0	15.329	By MS/MS	By MS/MS	By MS/MS	By MS/MS	5.5	4.4	6.9	9.2	39674000	9587900	6093000	13141000	10852000	0	0	0	10852000	2	2	3
SPBC543.04|npr3|II|SEA/Iml1/Npr2/3	SPBC543.04|npr3|II|SEA/Iml1/Npr2/3	2	2	2	>SPBC543.04|npr3|II|SEA/Iml1/Npr2/3 complex subunit Npr3 (predicted)	1	2	2	2	1	1	1	1	1	1	1	1	1	1	1	1	3.6	3.6	3.6	66.868	585	585	0	5.3129	By MS/MS	By matching	By MS/MS	By matching	2.1	2.1	1.5	1.5	8154800	1628400	3265100	1183100	2078100	0	2857000	0	0	0	0	1
SPCC1682.14|rpl1902|III|60S;SPBC56F2.02|rpl1901|II|60S	SPCC1682.14|rpl1902|III|60S;SPBC56F2.02|rpl1901|II|60S	1;1	1;1	1;1	>SPCC1682.14|rpl1902|III|60S ribosomal protein L19;>SPBC56F2.02|rpl1901|II|60S ribosomal protein L19	2	1	1	1	1	0	1	1	1	0	1	1	1	0	1	1	4.1	4.1	4.1	22.753	193	193;193	0.0090634	2.1513	By MS/MS	By matching	By MS/MS	By MS/MS	4.1	0	4.1	4.1	6453600	2382300	0	2397100	1674200	0	0	0	1674200	1	0	1
SPBC56F2.04|utp20|II|U3	SPBC56F2.04|utp20|II|U3	3	3	3	>SPBC56F2.04|utp20|II|U3 snoRNP protein Utp20 (predicted)	1	3	3	3	1	0	0	3	1	0	0	3	1	0	0	3	1.3	1.3	1.3	285.22	2493	2493	0	4.751	By MS/MS	By matching	By matching	By MS/MS	0.4	0	0	1.3	1189500	0	0	0	1189500	0	0	0	1189500	1	0	0
SPBC56F2.08c|puf1|II|pumilio	SPBC56F2.08c|puf1|II|pumilio	3	3	3	>SPBC56F2.08c|puf1|II|pumilio family RNA-binding protein Puf1 (predicted)	1	3	3	3	2	3	2	3	2	3	2	3	2	3	2	3	6.1	6.1	6.1	72.822	661	661	0	9.8862	By MS/MS	By MS/MS	By MS/MS	By MS/MS	3.8	6.1	3.8	6.1	36020000	5284400	11898000	6843600	11994000	5717800	10554000	6459200	9730100	0	4	0
SPBC56F2.09c|arg5|II|arginine	SPBC56F2.09c|arg5|II|arginine	5	5	5	>SPBC56F2.09c|arg5|II|arginine specific carbamoyl-phosphate synthase subunit Arg5 (predicted)	1	5	5	5	5	4	3	4	5	4	3	4	5	4	3	4	22.4	22.4	22.4	45.661	415	415	0	20.11	By MS/MS	By MS/MS	By MS/MS	By MS/MS	22.4	13.5	8.9	13.5	96972000	31992000	24478000	17592000	22910000	20075000	21614000	19003000	24772000	3	2	1
SPBC56F2.12|ilv5|II|acetohydroxyacid	SPBC56F2.12|ilv5|II|acetohydroxyacid	27	27	27	>SPBC56F2.12|ilv5|II|acetohydroxyacid reductoisomerase (predicted)	1	27	27	27	27	25	27	22	27	25	27	22	27	25	27	22	59.4	59.4	59.4	45.188	404	404	0	323.31	By MS/MS	By MS/MS	By MS/MS	By MS/MS	59.4	58.9	59.4	51.2	4350900000	1430000000	1018500000	1110400000	792060000	976420000	918460000	768080000	1040900000	36	32	30
SPBC577.02|rpl3801|II|60S	SPBC577.02|rpl3801|II|60S	2	2	1	>SPBC577.02|rpl3801|II|60S ribosomal protein L38 (predicted)	1	2	2	1	2	2	1	2	2	2	1	2	1	1	0	1	24.3	24.3	9.5	8.4919	74	74	0	7.5524	By MS/MS	By MS/MS	By matching	By MS/MS	24.3	24.3	14.9	24.3	54835000	12396000	14511000	12480000	15449000	0	0	0	15449000	1	1	0
SPBC577.06c|stt4|II|1-phosphatidylinositol	SPBC577.06c|stt4|II|1-phosphatidylinositol	5	5	5	>SPBC577.06c|stt4|II|1-phosphatidylinositol 4-kinase Stt4 (predicted)	1	5	5	5	4	1	5	3	4	1	5	3	4	1	5	3	3.4	3.4	3.4	213.96	1877	1877	0	33.773	By MS/MS	By MS/MS	By MS/MS	By MS/MS	2.5	0.4	3.4	1.8	22426000	7199100	1253600	6881500	7091800	4780900	0	0	8288500	4	1	3
SPBC582.03|cdc13|II|G2/M	SPBC582.03|cdc13|II|G2/M	7	7	7	>SPBC582.03|cdc13|II|G2/M B-type cyclin Cdc13	1	7	7	7	6	7	4	5	6	7	4	5	6	7	4	5	21.8	21.8	21.8	55.609	482	482	0	26.868	By MS/MS	By MS/MS	By MS/MS	By MS/MS	17.6	21.8	11.2	15.8	114960000	39325000	32901000	20602000	22136000	26014000	24897000	24642000	25090000	8	6	5
SPBC582.06c|mcp6|II|horsetail	SPBC582.06c|mcp6|II|horsetail	3	3	3	>SPBC582.06c|mcp6|II|horsetail movement protein Hrs1/Mcp6	1	3	3	3	2	2	1	2	2	2	1	2	2	2	1	2	16.2	16.2	16.2	38.103	327	327	0	8.2914	By MS/MS	By MS/MS	By matching	By MS/MS	9.2	13.1	6.1	13.1	31654000	13234000	9693000	3790500	4936600	0	8469500	0	4948600	1	1	0
SPBC582.07c|rpn7|II|19S	SPBC582.07c|rpn7|II|19S	3	3	3	>SPBC582.07c|rpn7|II|19S proteasome regulatory subunit Rpn7	1	3	3	3	3	2	3	1	3	2	3	1	3	2	3	1	8.1	8.1	8.1	46.68	409	409	0	8.0503	By MS/MS	By MS/MS	By MS/MS	By MS/MS	8.1	4.9	8.1	2.4	19544000	5706300	4654900	6295200	2887100	4569600	5004100	4452100	0	1	1	1
SPBC582.09|pex11|II|peroxisomal	SPBC582.09|pex11|II|peroxisomal	4	4	4	>SPBC582.09|pex11|II|peroxisomal biogenesis factor 11 (predicted)	1	4	4	4	4	4	4	3	4	4	4	3	4	4	4	3	16.8	16.8	16.8	26.478	238	238	0	10.225	By MS/MS	By MS/MS	By MS/MS	By MS/MS	16.8	16.8	16.8	13.9	64305000	19148000	15434000	14743000	14980000	15097000	12416000	13539000	15545000	3	4	2
SPBC646.02|cwf11|II|complexed	SPBC646.02|cwf11|II|complexed	4	4	4	>SPBC646.02|cwf11|II|complexed with Cdc5 protein Cwf11	1	4	4	4	1	2	1	1	1	2	1	1	1	2	1	1	2.9	2.9	2.9	148.37	1284	1284	0	5.8196	By MS/MS	By MS/MS	By MS/MS	By MS/MS	0.8	1.4	0.8	0.7	5270200	0	3275500	1994700	0	0	2866100	0	0	1	0	0
SPBC646.04|pla1|II|poly(A)	SPBC646.04|pla1|II|poly(A)	3	3	3	>SPBC646.04|pla1|II|poly(A) polymerase Pla1	1	3	3	3	2	3	2	2	2	3	2	2	2	3	2	2	6.2	6.2	6.2	64.108	566	566	0	10.966	By MS/MS	By MS/MS	By MS/MS	By MS/MS	4.8	6.2	4.8	4.1	18555000	5092400	6400900	3549500	3512400	4227500	5601700	0	0	2	2	2
SPBC646.05c|erg9|II|farnesyldiphosphate:farnesyldiphosphatefarnesyltransferase	SPBC646.05c|erg9|II|farnesyldiphosphate:farnesyldiphosphatefarnesyltransferase	6	6	6	>SPBC646.05c|erg9|II|farnesyldiphosphate:farnesyldiphosphatefarnesyltransferase (squalene synthase) Erg9	1	6	6	6	3	4	4	5	3	4	4	5	3	4	4	5	15.9	15.9	15.9	53.321	460	460	0	26.104	By MS/MS	By MS/MS	By MS/MS	By MS/MS	7.4	10.9	8.9	13.7	90921000	9866100	21096000	23897000	36063000	25857000	18154000	23356000	15141000	4	6	3
SPBC646.07c|tsc13|II|enoyl	SPBC646.07c|tsc13|II|enoyl	7	7	7	>SPBC646.07c|tsc13|II|enoyl reductase (predicted)	1	7	7	7	4	7	7	5	4	7	7	5	4	7	7	5	25.8	25.8	25.8	34.64	295	295	0	25.606	By MS/MS	By MS/MS	By MS/MS	By MS/MS	15.3	25.8	25.8	18.3	160200000	29292000	54083000	43950000	32875000	30148000	34537000	30301000	45940000	3	6	5
SPBC646.08c|SPBC646.08c|II|oxysterol	SPBC646.08c|SPBC646.08c|II|oxysterol	2	2	2	>SPBC646.08c|SPBC646.08c|II|oxysterol binding protein (predicted)	1	2	2	2	1	1	0	1	1	1	0	1	1	1	0	1	5	5	5	58.691	516	516	0	5.0932	By MS/MS	By matching	By matching	By MS/MS	2.7	2.7	0	2.3	6565900	2628100	3937700	0	0	0	3445600	0	0	1	0	0
SPBC646.09c|int6|II|eIF3e	SPBC646.09c|int6|II|eIF3e	8	8	8	>SPBC646.09c|int6|II|eIF3e subunit Int6	1	8	8	8	7	6	4	6	7	6	4	6	7	6	4	6	24	24	24	57.114	501	501	0	69.351	By MS/MS	By MS/MS	By MS/MS	By MS/MS	23.6	18	11	19.4	144560000	29853000	46490000	28414000	39800000	26512000	36240000	30685000	35366000	6	6	3
SPBC646.10c|nop56|II|U3	SPBC646.10c|nop56|II|U3	1	1	1	>SPBC646.10c|nop56|II|U3 snoRNP protein Nop56 (predicted)	1	1	1	1	1	1	1	1	1	1	1	1	1	1	1	1	2.4	2.4	2.4	55.388	497	497	0	3.2084	By MS/MS	By MS/MS	By MS/MS	By MS/MS	2.4	2.4	2.4	2.4	13590000	3609800	3676800	2836900	3466600	0	0	0	3466600	1	1	1
SPBC646.11|cct6|II|chaperonin-containing	SPBC646.11|cct6|II|chaperonin-containing	7	7	7	>SPBC646.11|cct6|II|chaperonin-containing T-complex zeta subunit Cct6	1	7	7	7	6	6	5	5	6	6	5	5	6	6	5	5	18.7	18.7	18.7	58.548	535	535	0	59.405	By MS/MS	By MS/MS	By MS/MS	By MS/MS	17	17	15.3	14	120630000	37717000	28369000	29381000	25163000	24186000	29683000	20930000	30842000	5	5	3
SPBC646.13|sds23|II|PP2A-type	SPBC646.13|sds23|II|PP2A-type	7	7	7	>SPBC646.13|sds23|II|PP2A-type phosphatase inhibitor Sds23/Moc1	1	7	7	7	6	5	6	6	6	5	6	6	6	5	6	6	19.1	19.1	19.1	44.288	408	408	0	21.025	By MS/MS	By MS/MS	By MS/MS	By MS/MS	15.7	13.5	15.7	16.9	152520000	38966000	37206000	37653000	38693000	29626000	34743000	32377000	38046000	4	4	5
SPBC646.16|scl1|II|20S	SPBC646.16|scl1|II|20S	4	4	4	>SPBC646.16|scl1|II|20S proteasome complex subunit alpha 1 (predicted)	1	4	4	4	1	3	1	3	1	3	1	3	1	3	1	3	17.6	17.6	17.6	26.539	244	244	0	8.889	By MS/MS	By MS/MS	By MS/MS	By MS/MS	3.7	13.1	3.7	11.1	18433000	3382300	7125600	4374400	3550200	0	4685900	0	5099400	0	2	1
SPBC649.02|rps1902|II|40S	SPBC649.02|rps1902|II|40S	4	2	2	>SPBC649.02|rps1902|II|40S ribosomal protein S19 (predicted)	1	4	2	2	4	3	3	4	2	1	1	2	2	1	1	2	28.7	11.9	11.9	16.062	143	143	0	6.2779	By MS/MS	By MS/MS	By matching	By MS/MS	28.7	28	28.7	28.7	19025000	5926200	5417400	1320600	6361000	4920700	0	0	0	2	1	0
SPBC651.01c|nog1|II|GTP	SPBC651.01c|nog1|II|GTP	3	3	3	>SPBC651.01c|nog1|II|GTP binding protein Nog1 (predicted)	1	3	3	3	3	2	1	3	3	2	1	3	3	2	1	3	4.8	4.8	4.8	72.798	642	642	0	7.3711	By MS/MS	By matching	By matching	By MS/MS	4.8	3.6	1.6	4.8	28346000	6720900	9748800	3654900	8221600	6374100	0	0	7428000	2	0	0
SPBC660.07|ntp1|II|alpha,alpha-trehalase	SPBC660.07|ntp1|II|alpha,alpha-trehalase	8	8	8	>SPBC660.07|ntp1|II|alpha,alpha-trehalase Ntp1	1	8	8	8	4	3	4	6	4	3	4	6	4	3	4	6	12.7	12.7	12.7	84.602	735	735	0	20.722	By MS/MS	By MS/MS	By MS/MS	By MS/MS	6.5	4.2	6.4	8.7	54271000	11146000	11716000	16013000	15396000	10081000	12243000	12694000	13148000	2	2	2
SPBC660.15|msi2|II|mRNA	SPBC660.15|msi2|II|mRNA	1	1	1	>SPBC660.15|msi2|II|mRNA cleavage factor complex subunit Msi2	1	1	1	1	1	1	1	1	1	1	1	1	1	1	1	1	1.7	1.7	1.7	52.818	474	474	0.0023659	2.5403	By MS/MS	By MS/MS	By MS/MS	By MS/MS	1.7	1.7	1.7	1.7	9505000	1522100	3219800	2117200	2645900	0	0	0	2645900	1	1	1
SPBC660.16|SPBC660.16|II|phosphogluconate	SPBC660.16|SPBC660.16|II|phosphogluconate	23	23	23	>SPBC660.16|SPBC660.16|II|phosphogluconate dehydrogenase, decarboxylating	1	23	23	23	21	20	18	18	21	20	18	18	21	20	18	18	65	65	65	53.679	492	492	0	175.02	By MS/MS	By MS/MS	By MS/MS	By MS/MS	55.3	61.4	48.6	54.1	1645600000	411880000	490130000	358340000	385280000	330740000	412470000	298200000	361840000	22	24	20
SPBC685.06|rps001|II|40S	SPBC685.06|rps001|II|40S	6	5	5	>SPBC685.06|rps001|II|40S ribosomal protein S0A (p40)	1	6	5	5	4	4	3	5	3	3	2	4	3	3	2	4	27.1	22.6	22.6	31.759	292	292	0	35.865	By MS/MS	By MS/MS	By MS/MS	By MS/MS	22.9	22.9	13	17.1	107700000	29543000	23986000	38728000	15442000	24362000	19023000	24014000	13319000	3	3	2
SPBC685.07c|rpl2701|II|60S	SPBC685.07c|rpl2701|II|60S	4	1	1	>SPBC685.07c|rpl2701|II|60S ribosomal protein L27	1	4	1	1	3	2	4	2	1	0	1	1	1	0	1	1	25.7	8.1	8.1	15.389	136	136	0	3.159	By MS/MS	By matching	By matching	By MS/MS	15.4	16.9	25.7	18.4	4406900	1550700	0	1736400	1119800	0	0	0	1119800	1	0	0
SPBC691.03c|apl3|II|AP-2	SPBC691.03c|apl3|II|AP-2	9	9	9	>SPBC691.03c|apl3|II|AP-2 adaptor complex subunit Alp3 (predicted)	1	9	9	9	4	3	4	7	4	3	4	7	4	3	4	7	11.8	11.8	11.8	100.08	878	878	0	34.585	By MS/MS	By MS/MS	By MS/MS	By MS/MS	4.4	3.5	4.7	9.8	46082000	8216800	8844700	10969000	18051000	9365600	10828000	8637600	12868000	4	3	3
SPBC6B1.08c|ofd1|II|2-oxoglutarate	SPBC6B1.08c|ofd1|II|2-oxoglutarate	3	3	3	>SPBC6B1.08c|ofd1|II|2-oxoglutarate and Fe(II) dioxygenase domain containing protein 1	1	3	3	3	2	3	3	2	2	3	3	2	2	3	3	2	8.5	8.5	8.5	59.177	515	515	0	10.101	By MS/MS	By MS/MS	By MS/MS	By MS/MS	4.9	8.5	8.5	6.4	39194000	5154000	16520000	9277300	8243300	0	12394000	7220300	10769000	0	2	2
SPBC713.02c|ubp15|II|ubiquitin	SPBC713.02c|ubp15|II|ubiquitin	24	24	24	>SPBC713.02c|ubp15|II|ubiquitin C-terminal hydrolase Ubp15	1	24	24	24	18	21	18	17	18	21	18	17	18	21	18	17	28.4	28.4	28.4	130.83	1129	1129	0	109.43	By MS/MS	By MS/MS	By MS/MS	By MS/MS	19.9	24.5	20.6	17.4	542650000	112760000	180810000	108270000	140820000	106600000	121940000	99885000	132670000	17	20	18
SPBC713.03|SPBC713.03|II|mitochondrial	SPBC713.03|SPBC713.03|II|mitochondrial	2	2	2	>SPBC713.03|SPBC713.03|II|mitochondrial D-lactate dehydrogenase, cytochrome (predicted)	1	2	2	2	0	2	0	0	0	2	0	0	0	2	0	0	4.6	4.6	4.6	58.472	526	526	0	5.9913	By matching	By MS/MS	By matching	By matching	0	4.6	0	0	2102000	0	2102000	0	0	0	1839200	0	0	0	1	0
SPBC713.04c|pwp2|II|U3	SPBC713.04c|pwp2|II|U3	5	5	5	>SPBC713.04c|pwp2|II|U3 snoRNP-associated protein Utp1 (predicted)	1	5	5	5	2	5	1	3	2	5	1	3	2	5	1	3	7.8	7.8	7.8	95.44	854	854	0	13.303	By MS/MS	By MS/MS	By MS/MS	By MS/MS	2	7.8	0.9	4.7	23571000	3590900	11790000	1180600	7009300	7145600	6511600	0	6650200	1	5	1
SPBC713.12|erg1|II|squalene	SPBC713.12|erg1|II|squalene	10	10	10	>SPBC713.12|erg1|II|squalene monooxygenase Erg1 (predicted)	1	10	10	10	8	9	9	9	8	9	9	9	8	9	9	9	33.7	33.7	33.7	50.338	457	457	0	53.715	By MS/MS	By MS/MS	By MS/MS	By MS/MS	26.7	30.4	28.2	30.4	313890000	80209000	75015000	73617000	85044000	67435000	71060000	60860000	78907000	6	7	8
SPBC725.01|maa1|II|mitochondrial	SPBC725.01|maa1|II|mitochondrial	2	2	2	>SPBC725.01|maa1|II|mitochondrial aspartate aminotransferase Maa1 (predicted)	1	2	2	2	1	0	1	2	1	0	1	2	1	0	1	2	6.4	6.4	6.4	48.243	437	437	0	4.7918	By MS/MS	By matching	By matching	By MS/MS	3.4	0	3.4	6.4	7568400	1997200	0	2043100	3528200	0	0	0	3528200	1	0	0
SPBC725.09c|hob3|II|BAR	SPBC725.09c|hob3|II|BAR	4	4	4	>SPBC725.09c|hob3|II|BAR adaptor protein Hob3	1	4	4	4	4	3	3	2	4	3	3	2	4	3	3	2	17.4	17.4	17.4	30.094	264	264	0	11.688	By MS/MS	By MS/MS	By MS/MS	By MS/MS	17.4	13.3	14.8	10.6	52220000	17959000	11824000	12486000	9950500	11353000	13247000	10322000	10629000	4	2	3
SPBC725.15|ura5|II|orotate	SPBC725.15|ura5|II|orotate	1	1	1	>SPBC725.15|ura5|II|orotate phosphoribosyltransferase Ura5	1	1	1	1	0	0	0	1	0	0	0	1	0	0	0	1	4.7	4.7	4.7	23.716	215	215	0	5.8029	By matching	By matching	By matching	By MS/MS	0	0	0	4.7	0	0	0	0	0	0	0	0	0	0	0	0
SPBC725.16|res1|II|MBF	SPBC725.16|res1|II|MBF	12	12	12	>SPBC725.16|res1|II|MBF transcription factor complex subunit Res1	1	12	12	12	8	11	9	7	8	11	9	7	8	11	9	7	25.3	25.3	25.3	72.441	637	637	0	64.999	By MS/MS	By MS/MS	By MS/MS	By MS/MS	17	23.7	20.1	16.2	281760000	77406000	74949000	70007000	59400000	64048000	48659000	53103000	60170000	8	9	7
SPBC776.02c|dis2|II|serine/threonine	SPBC776.02c|dis2|II|serine/threonine	1	1	1	>SPBC776.02c|dis2|II|serine/threonine protein phosphatase PP1, Dis2	1	1	1	1	1	1	1	1	1	1	1	1	1	1	1	1	4	4	4	37.636	327	327	0	3.4502	By matching	By matching	By matching	By MS/MS	4	4	4	4	27226000	4927400	5701400	7995700	8601600	0	0	0	8601600	0	0	0
SPBC776.03|SPBC776.03|II|homoserine	SPBC776.03|SPBC776.03|II|homoserine	4	4	4	>SPBC776.03|SPBC776.03|II|homoserine dehydrogenase (predicted)	1	4	4	4	3	3	2	4	3	3	2	4	3	3	2	4	21.3	21.3	21.3	40.037	376	376	0	19.901	By MS/MS	By MS/MS	By MS/MS	By MS/MS	15.4	15.4	9.8	21.3	50682000	13269000	16474000	8473500	12465000	11044000	13386000	0	13468000	2	1	1
SPBC776.04|sec2302|II|COPII	SPBC776.04|sec2302|II|COPII	5	5	5	>SPBC776.04|sec2302|II|COPII cargo receptor subunit Sec23b (predicted)	1	5	5	5	2	2	4	3	2	2	4	3	2	2	4	3	8.9	8.9	8.9	85.381	765	765	0	18.224	By MS/MS	By MS/MS	By MS/MS	By MS/MS	3.1	3.7	7.5	5.1	43002000	5258700	8785600	8287500	20670000	8372900	8147200	7796400	15272000	1	1	4
SPBC776.08c|utp22|II|small-subunit	SPBC776.08c|utp22|II|small-subunit	4	4	4	>SPBC776.08c|utp22|II|small-subunit processome, UTP-C complex subunit Utp22 (predicted)	1	4	4	4	2	2	2	1	2	2	2	1	2	2	2	1	4.2	4.2	4.2	126.08	1097	1097	0	8.835	By MS/MS	By MS/MS	By MS/MS	By MS/MS	1.6	1.8	2.4	1.1	13662000	1929700	2624100	6167500	2940600	0	0	5108700	0	2	2	2
SPBC776.09|ste13|II|ATP-dependent	SPBC776.09|ste13|II|ATP-dependent	8	8	8	>SPBC776.09|ste13|II|ATP-dependent RNA helicase Ste13	1	8	8	8	6	5	7	7	6	5	7	7	6	5	7	7	20.8	20.8	20.8	54.794	485	485	0	48.261	By MS/MS	By MS/MS	By MS/MS	By MS/MS	15.7	12.8	17.9	18.6	175780000	47404000	36242000	51493000	40637000	39681000	31736000	39888000	32184000	5	6	6
SPBC776.11|rpl2801|II|60S	SPBC776.11|rpl2801|II|60S	9	3	3	>SPBC776.11|rpl2801|II|60S ribosomal protein L27/L28	1	9	3	3	9	9	9	9	3	3	3	3	3	3	3	3	56.1	15.5	15.5	16.685	148	148	0	10.621	By MS/MS	By MS/MS	By MS/MS	By MS/MS	56.1	56.1	56.1	56.1	259340000	66407000	64727000	70578000	57624000	55533000	55361000	58845000	58124000	3	4	3
SPBC776.13|cnd1|II|condensin	SPBC776.13|cnd1|II|condensin	2	2	2	>SPBC776.13|cnd1|II|condensin complex non-SMC subunit Cnd1	1	2	2	2	1	2	1	1	1	2	1	1	1	2	1	1	1.7	1.7	1.7	131.32	1158	1158	0	3.16	By MS/MS	By matching	By MS/MS	By MS/MS	1	1.7	0.7	0.7	8814800	1818000	4356800	1655800	984180	0	3812300	0	0	0	0	1
SPBC776.15c|kgd2|II|dihydrolipoamide	SPBC776.15c|kgd2|II|dihydrolipoamide	1	1	1	>SPBC776.15c|kgd2|II|dihydrolipoamide S-succinyltransferase, e2 component of oxoglutarate dehydrogenase complex Kdg2 (predicted)	1	1	1	1	1	1	1	1	1	1	1	1	1	1	1	1	1.8	1.8	1.8	48.964	452	452	0	3.1533	By MS/MS	By MS/MS	By MS/MS	By MS/MS	1.8	1.8	1.8	1.8	12463000	6377700	3535100	0	2550100	0	0	0	2550100	1	1	1
SPBC800.03|clr3|II|histone	SPBC800.03|clr3|II|histone	2	2	2	>SPBC800.03|clr3|II|histone deacetylase (class II) Clr3	1	2	2	2	1	1	0	1	1	1	0	1	1	1	0	1	3.1	3.1	3.1	76.791	687	687	0	3.461	By MS/MS	By MS/MS	By matching	By MS/MS	1.3	1.7	0	1.7	1462000	0	1462000	0	0	0	1279300	0	0	1	1	0
SPBC800.05c|atb2|II|tubulin	SPBC800.05c|atb2|II|tubulin	7	7	4	>SPBC800.05c|atb2|II|tubulin alpha 2	1	7	7	4	5	6	5	5	5	6	5	5	3	3	2	2	22.3	22.3	14	50.535	449	449	0	35.875	By MS/MS	By MS/MS	By MS/MS	By MS/MS	15.6	17.6	16.5	14.9	139880000	37098000	40875000	27553000	34349000	27578000	32100000	29131000	34933000	3	6	4
SPBC83.08|rvb2|II|AAA	SPBC83.08|rvb2|II|AAA	9	9	9	>SPBC83.08|rvb2|II|AAA family ATPase Rvb2	1	9	9	9	7	6	7	4	7	6	7	4	7	6	7	4	24.9	24.9	24.9	51.561	465	465	0	36.552	By MS/MS	By MS/MS	By MS/MS	By MS/MS	19.6	16.8	19.6	12.7	88894000	24751000	17434000	25713000	20997000	16339000	15870000	17863000	28029000	2	3	1
SPBC83.16c|SPBC83.16c|II|conserved	SPBC83.16c|SPBC83.16c|II|conserved	6	6	6	>SPBC83.16c|SPBC83.16c|II|conserved eukaryotic protein	1	6	6	6	6	4	4	3	6	4	4	3	6	4	4	3	12.8	12.8	12.8	63.484	563	563	0	36.249	By MS/MS	By MS/MS	By MS/MS	By MS/MS	12.8	8.3	9.1	7.3	73819000	27017000	16692000	19692000	10419000	16423000	15615000	15917000	15813000	4	4	3
SPBC83.17|mbf1|II|transcriptional	SPBC83.17|mbf1|II|transcriptional	2	2	2	>SPBC83.17|mbf1|II|transcriptional coactivator, multiprotein bridging factor Mbf1 (predicted)	1	2	2	2	2	0	2	0	2	0	2	0	2	0	2	0	18.2	18.2	18.2	15.979	148	148	0	8.1175	By MS/MS	By matching	By MS/MS	By matching	18.2	0	18.2	0	9973000	4781900	0	5191100	0	0	0	4299900	0	2	0	2
SPBC839.05c|rps1701|II|40S	SPBC839.05c|rps1701|II|40S	5	5	2	>SPBC839.05c|rps1701|II|40S ribosomal protein S17 (predicted)	1	5	5	2	4	5	4	2	4	5	4	2	1	2	1	0	30.5	30.5	14.5	15.514	131	131	0	16.697	By MS/MS	By MS/MS	By MS/MS	By MS/MS	23.7	30.5	23.7	7.6	140220000	47763000	37144000	43833000	11479000	35264000	27179000	33769000	23736000	2	3	3
SPBC839.08c|its8|II|pig-N	SPBC839.08c|its8|II|pig-N	5	5	5	>SPBC839.08c|its8|II|pig-N (predicted)	1	5	5	5	4	5	4	4	4	5	4	4	4	5	4	4	6.4	6.4	6.4	106.4	935	935	0	15.193	By MS/MS	By MS/MS	By MS/MS	By MS/MS	5.7	6.4	5.7	5.5	1017600000	325500000	182480000	497740000	11832000	172070000	269700000	165290000	247010000	3	5	2
SPBC839.16|thf1|II|C1-5,6,7,8-tetrahydrofolate	SPBC839.16|thf1|II|C1-5,6,7,8-tetrahydrofolate	25	25	25	>SPBC839.16|thf1|II|C1-5,6,7,8-tetrahydrofolate (THF) synthase, trifunctional enzyme Thf1	1	25	25	25	25	19	25	17	25	19	25	17	25	19	25	17	33.7	33.7	33.7	101.2	937	937	0	165.85	By MS/MS	By MS/MS	By MS/MS	By MS/MS	33.7	25.8	33.7	22.7	750440000	292960000	133830000	226300000	97351000	214800000	135130000	168040000	127190000	24	14	19
SPBC839.17c|fkh1|II|FKBP12	SPBC839.17c|fkh1|II|FKBP12	1	1	1	>SPBC839.17c|fkh1|II|FKBP12 peptidyl-prolyl cis-trans isomerase Fkh1	1	1	1	1	1	1	1	1	1	1	1	1	1	1	1	1	10.7	10.7	10.7	12.043	112	112	0.0083778	2.2215	By matching	By MS/MS	By matching	By MS/MS	10.7	10.7	10.7	10.7	23704000	7399600	6612900	4788000	4903100	0	0	0	4903100	0	0	0
SPBC887.04c|lub1|II|WD	SPBC887.04c|lub1|II|WD	1	1	1	>SPBC887.04c|lub1|II|WD repeat protein Lub1	1	1	1	1	1	1	1	1	1	1	1	1	1	1	1	1	1.1	1.1	1.1	79.221	718	718	0.0039246	2.4699	By MS/MS	By MS/MS	By matching	By MS/MS	1.1	1.1	1.1	1.1	8126600	1432900	1949300	2140600	2603900	0	0	0	2603900	1	1	0
SPBC887.09c|sog2|II|leucine-rich	SPBC887.09c|sog2|II|leucine-rich	3	3	3	>SPBC887.09c|sog2|II|leucine-rich repeat protein Lrp1	1	3	3	3	3	3	3	2	3	3	3	2	3	3	3	2	3.3	3.3	3.3	96.992	886	886	0	6.1507	By MS/MS	By MS/MS	By MS/MS	By MS/MS	3.3	3.3	3.3	2.4	33875000	11099000	7760600	11897000	3118100	8184000	6798500	7978800	6017700	2	1	2
SPBC887.15c|sur2|II|sphingosine	SPBC887.15c|sur2|II|sphingosine	2	2	2	>SPBC887.15c|sur2|II|sphingosine hydroxylase Sur2	1	2	2	2	2	2	2	2	2	2	2	2	2	2	2	2	9.2	9.2	9.2	34.19	293	293	0	5.6659	By MS/MS	By MS/MS	By MS/MS	By MS/MS	9.2	9.2	9.2	9.2	121670000	26713000	31401000	26893000	36663000	24872000	27887000	23570000	32267000	1	2	3
SPBC887.17|SPBC887.17|II|transmembrane	SPBC887.17|SPBC887.17|II|transmembrane	2	2	2	>SPBC887.17|SPBC887.17|II|transmembrane transporter (predicted)	1	2	2	2	1	1	0	2	1	1	0	2	1	1	0	2	3.7	3.7	3.7	68.562	625	625	0	7.1954	By matching	By MS/MS	By matching	By MS/MS	1.9	1.8	0	3.7	14566000	2571000	7252500	0	4742300	0	0	0	4742300	0	1	0
SPBC887.18c|hfi1|II|SAGA	SPBC887.18c|hfi1|II|SAGA	4	4	4	>SPBC887.18c|hfi1|II|SAGA complex subunit Hfi1	1	4	4	4	4	2	2	2	4	2	2	2	4	2	2	2	17.7	17.7	17.7	37.945	339	339	0	17.444	By MS/MS	By MS/MS	By MS/MS	By MS/MS	17.7	9.7	9.7	9.7	59012000	27053000	12767000	11398000	7794400	17485000	14143000	10470000	8772000	4	1	2
SPBC8D2.01|gsk31|II|serine/threonine	SPBC8D2.01|gsk31|II|serine/threonine	4	4	4	>SPBC8D2.01|gsk31|II|serine/threonine protein kinase Gsk31 (predicted)	1	4	4	4	1	4	1	3	1	4	1	3	1	4	1	3	10.2	10.2	10.2	43.381	381	381	0	12.283	By MS/MS	By MS/MS	By MS/MS	By MS/MS	2.1	10.2	2.1	8.1	20773000	2946000	6860600	2626800	8339200	0	6907000	0	7435300	1	3	1
SPBC8D2.02c|vps68|II|vacuolar	SPBC8D2.02c|vps68|II|vacuolar	2	2	2	>SPBC8D2.02c|vps68|II|vacuolar sorting protein Vps68 (predicted)	1	2	2	2	2	2	2	1	2	2	2	1	2	2	2	1	14.1	14.1	14.1	18.816	170	170	0	7.1998	By MS/MS	By MS/MS	By MS/MS	By MS/MS	14.1	14.1	14.1	5.3	32687000	5497500	13105000	8466000	5619300	0	11247000	7231900	0	2	1	2
SPBC8D2.06|irs1|II|cytoplasmic	SPBC8D2.06|irs1|II|cytoplasmic	44	44	44	>SPBC8D2.06|irs1|II|cytoplasmic isoleucine-tRNA ligase Irs1 (predicted)	1	44	44	44	38	38	36	33	38	38	36	33	38	38	36	33	46.6	46.6	46.6	122.91	1064	1064	0	323.31	By MS/MS	By MS/MS	By MS/MS	By MS/MS	41.9	39.8	40	39.9	3161000000	656770000	1108700000	636070000	759470000	502960000	853710000	514180000	778670000	35	47	31
SPBC8D2.18c|SPBC8D2.18c|II|adenosylhomocysteinase	SPBC8D2.18c|SPBC8D2.18c|II|adenosylhomocysteinase	19	19	19	>SPBC8D2.18c|SPBC8D2.18c|II|adenosylhomocysteinase (predicted)	1	19	19	19	18	16	19	14	18	16	19	14	18	16	19	14	51.5	51.5	51.5	47.383	433	433	0	323.31	By MS/MS	By MS/MS	By MS/MS	By MS/MS	50.1	42.7	51.5	40	1948400000	685400000	383160000	613860000	266010000	538490000	345590000	450980000	332390000	26	22	24
SPBC8D2.20c|sec31|II|COPII-coated	SPBC8D2.20c|sec31|II|COPII-coated	7	7	7	>SPBC8D2.20c|sec31|II|COPII-coated vesicle component Sec31 (predicted)	1	7	7	7	2	4	4	5	2	4	4	5	2	4	4	5	8.5	8.5	8.5	132.5	1224	1224	0	21.164	By matching	By MS/MS	By MS/MS	By MS/MS	2.5	4.8	4.6	6.4	54052000	5886300	13653000	12598000	21915000	0	14894000	0	18967000	0	1	3
SPBC8E4.01c|pho84|II|inorganic;SPBC1683.01|SPBC1683.01|II|inorganic	SPBC8E4.01c|pho84|II|inorganic	4;1	4;1	4;1	>SPBC8E4.01c|pho84|II|inorganic phosphate transmembrane transporter (predicted)	2	4	4	4	3	2	4	1	3	2	4	1	3	2	4	1	8.9	8.9	8.9	63.645	572	572;573	0	14.546	By MS/MS	By MS/MS	By MS/MS	By MS/MS	7.5	4.5	8.9	2.4	67551000	22714000	15366000	25880000	3591500	17468000	17876000	18398000	0	3	1	3
SPBC8E4.03|SPBC8E4.03|II|agmatinase	SPBC8E4.03|SPBC8E4.03|II|agmatinase	1	1	1	>SPBC8E4.03|SPBC8E4.03|II|agmatinase 2 (predicted)	1	1	1	1	0	1	0	0	0	1	0	0	0	1	0	0	3.9	3.9	3.9	45.901	413	413	0	3.6377	By matching	By MS/MS	By matching	By matching	0	3.9	0	0	3489500	0	3489500	0	0	0	3053400	0	0	0	1	0
SPBC902.04|rmn1|II|RNA-binding	SPBC902.04|rmn1|II|RNA-binding	4	4	4	>SPBC902.04|rmn1|II|RNA-binding protein	1	4	4	4	3	1	2	1	3	1	2	1	3	1	2	1	8	8	8	66.898	589	589	0	23.844	By MS/MS	By MS/MS	By MS/MS	By MS/MS	5.6	2	4.6	2	18684000	8135600	2586100	5624900	2337500	6755200	0	0	0	3	1	2
SPBC902.05c|idh2|II|isocitrate	SPBC902.05c|idh2|II|isocitrate	2	2	2	>SPBC902.05c|idh2|II|isocitrate dehydrogenase (NAD+) subunit 2	1	2	2	2	1	1	2	1	1	1	2	1	1	1	2	1	7.9	7.9	7.9	41.188	379	379	0	5.6019	By MS/MS	By MS/MS	By MS/MS	By MS/MS	4.5	4.5	7.9	4.5	12378000	2997400	3626700	2168600	3584900	0	0	0	3584900	0	1	2
SPBC902.06|mto2|II|MT	SPBC902.06|mto2|II|MT	12	12	12	>SPBC902.06|mto2|II|MT organizer Mto2	1	12	12	12	12	12	12	12	12	12	12	12	12	12	12	12	54.2	54.2	54.2	44.017	397	397	0	323.31	By MS/MS	By MS/MS	By MS/MS	By MS/MS	54.2	54.2	54.2	54.2	25076000000	6953700000	6941000000	5822100000	5359400000	5970500000	5742200000	5019300000	5042400000	36	34	33
SPBC947.02|apl2|II|AP-1	SPBC947.02|apl2|II|AP-1	6	6	6	>SPBC947.02|apl2|II|AP-1 adaptor complex subunit beta subunit Apl2	1	6	6	6	3	5	2	4	3	5	2	4	3	5	2	4	10.7	10.7	10.7	76.681	683	683	0	29.75	By MS/MS	By MS/MS	By MS/MS	By MS/MS	5.4	9.2	2.9	6.6	47235000	13290000	14497000	3339900	16109000	13225000	11972000	0	14631000	3	4	2
SPBC947.15c|nde1|II|mitochondrial	SPBC947.15c|nde1|II|mitochondrial	2	2	2	>SPBC947.15c|nde1|II|mitochondrial NADH dehydrogenase (ubiquinone) Nde1 (predicted)	1	2	2	2	1	2	0	0	1	2	0	0	1	2	0	0	5.3	5.3	5.3	60.78	551	551	0.003879	2.3832	By MS/MS	By MS/MS	By matching	By matching	2.7	5.3	0	0	21605000	10423000	11182000	0	0	0	9784700	0	0	1	1	0
SPBC9B6.04c|tuf1|II|mitochondrial	SPBC9B6.04c|tuf1|II|mitochondrial	14	14	14	>SPBC9B6.04c|tuf1|II|mitochondrial translation elongation factor EF-Tu Tuf1	1	14	14	14	11	8	10	9	11	8	10	9	11	8	10	9	36	36	36	48.282	439	439	0	84.568	By MS/MS	By MS/MS	By MS/MS	By MS/MS	33.3	23.9	29.8	21.4	248090000	73849000	68908000	61886000	43447000	46936000	61150000	45018000	61737000	12	10	6
SPBC9B6.10|cdc37|II|Hsp90	SPBC9B6.10|cdc37|II|Hsp90	1	1	1	>SPBC9B6.10|cdc37|II|Hsp90 co-chaperone Cdc37	1	1	1	1	1	0	1	1	1	0	1	1	1	0	1	1	2.6	2.6	2.6	52.553	466	466	0	3.3605	By matching	By matching	By matching	By MS/MS	2.6	0	2.6	2.6	6271300	2058900	0	2127900	2084600	0	0	0	2084600	0	0	0
SPBC9B6.11c|SPBC9B6.11c|II|CCR4/nocturin	SPBC9B6.11c|SPBC9B6.11c|II|CCR4/nocturin	1	1	1	>SPBC9B6.11c|SPBC9B6.11c|II|CCR4/nocturin family endoribonuclease (predicted)	1	1	1	1	0	1	0	0	0	1	0	0	0	1	0	0	2.6	2.6	2.6	57.65	502	502	0.0008244	3.0759	By matching	By MS/MS	By matching	By matching	0	2.6	0	0	1649400	0	1649400	0	0	0	1443200	0	0	0	1	0
SPBP16F5.03c|tra1|II|SAGA	SPBP16F5.03c|tra1|II|SAGA	137	137	135	>SPBP16F5.03c|tra1|II|SAGA complex phosphatidylinositol pseudokinase Tra1	1	137	137	135	134	110	119	90	134	110	119	90	132	109	117	89	43.1	43.1	42.7	422.33	3699	3699	0	323.31	By MS/MS	By MS/MS	By MS/MS	By MS/MS	42	35.3	38.1	29.4	5989100000	2459600000	1375200000	1330400000	823840000	1861200000	1239400000	1073100000	941250000	138	103	106
SPBP16F5.08c|SPBP16F5.08c|II|flavin	SPBP16F5.08c|SPBP16F5.08c|II|flavin	10	10	10	>SPBP16F5.08c|SPBP16F5.08c|II|flavin dependent monooxygenase (predicted)	1	10	10	10	7	8	7	6	7	8	7	6	7	8	7	6	31.5	31.5	31.5	49.889	447	447	0	43.62	By MS/MS	By MS/MS	By MS/MS	By MS/MS	21.3	23	18.8	21.3	187290000	44239000	47055000	66282000	29717000	40845000	45080000	34165000	42436000	5	6	3
SPBP19A11.03c|mts4|II|19S	SPBP19A11.03c|mts4|II|19S	19	19	19	>SPBP19A11.03c|mts4|II|19S proteasome regulatory subunit Mts4	1	19	19	19	15	13	16	14	15	13	16	14	15	13	16	14	29	29	29	97.998	891	891	0	102.33	By MS/MS	By MS/MS	By MS/MS	By MS/MS	20.8	20.7	23.9	22.3	474690000	113390000	129240000	123830000	108230000	97147000	107680000	98439000	107620000	14	10	13
SPBP19A11.04c|mor2|II|morphogenesis	SPBP19A11.04c|mor2|II|morphogenesis	2	2	2	>SPBP19A11.04c|mor2|II|morphogenesis protein Mor2	1	2	2	2	1	1	0	2	1	1	0	2	1	1	0	2	1	1	1	251.19	2196	2196	0	4.2617	By MS/MS	By MS/MS	By matching	By MS/MS	0.5	0.5	0	1	4898000	1040800	1702700	0	2154500	0	0	0	2154500	0	1	0
SPBP22H7.07|prp5|II|WD	SPBP22H7.07|prp5|II|WD	2	2	2	>SPBP22H7.07|prp5|II|WD repeat protein Prp5	1	2	2	2	1	0	2	2	1	0	2	2	1	0	2	2	6.6	6.6	6.6	52.418	473	473	0	4.8342	By MS/MS	By matching	By MS/MS	By MS/MS	4.2	0	6.6	6.6	12330000	2770000	0	4520000	5040500	0	0	4241600	4543000	0	0	1
SPBP22H7.08|rps1002|II|40S	SPBP22H7.08|rps1002|II|40S	5	3	3	>SPBP22H7.08|rps1002|II|40S ribosomal protein S10 (predicted)	1	5	3	3	4	5	4	4	2	3	2	2	2	3	2	2	40.1	21.1	21.1	16.443	147	147	0	13.776	By MS/MS	By MS/MS	By MS/MS	By MS/MS	39.5	40.1	39.5	39.5	131100000	40862000	28767000	37660000	23808000	35147000	24289000	31502000	23165000	3	3	2
SPBP23A10.05|ssr4|II|SWI/SNF	SPBP23A10.05|ssr4|II|SWI/SNF	1	1	1	>SPBP23A10.05|ssr4|II|SWI/SNF and RSC complex subunit Ssr4	1	1	1	1	1	1	1	1	1	1	1	1	1	1	1	1	2.5	2.5	2.5	44.254	395	395	0.0039002	2.4239	By MS/MS	By matching	By MS/MS	By MS/MS	2.5	2.5	2.5	2.5	5670300	1703900	663540	2285300	1017600	0	0	0	1017600	1	0	1
SPBP23A10.07|rpa2|II|DNA-directed	SPBP23A10.07|rpa2|II|DNA-directed	12	12	12	>SPBP23A10.07|rpa2|II|DNA-directed RNA polymerase I complex subunit Rpa2	1	12	12	12	6	8	9	8	6	8	9	8	6	8	9	8	14.7	14.7	14.7	131.69	1174	1174	0	54.71	By MS/MS	By MS/MS	By MS/MS	By MS/MS	6.6	10.5	10.6	10	146300000	21647000	40569000	42560000	41526000	22788000	33148000	30733000	43584000	4	6	7
SPBP23A10.15c|qcr1|II|mitochondrial	SPBP23A10.15c|qcr1|II|mitochondrial	5	5	5	>SPBP23A10.15c|qcr1|II|mitochondrial processing peptidase (MPP) complex beta subunit Mas1 (predicted)	1	5	5	5	4	3	4	5	4	3	4	5	4	3	4	5	18.6	18.6	18.6	50.737	457	457	0	53.16	By MS/MS	By MS/MS	By MS/MS	By MS/MS	12.9	10.5	12.9	18.6	90376000	26030000	22058000	13309000	28978000	24123000	20966000	16600000	19230000	4	3	3
SPBP23A10.16|sdh4|II|TIM22	SPBP23A10.16|sdh4|II|TIM22	4	4	4	>SPBP23A10.16|sdh4|II|TIM22 inner membrane protein import complex anchor subunit Tim18	1	4	4	4	3	4	4	4	3	4	4	4	3	4	4	4	28.3	28.3	28.3	17.744	159	159	0	13.697	By MS/MS	By MS/MS	By MS/MS	By MS/MS	19.5	28.3	28.3	28.3	195320000	40446000	61067000	44379000	49423000	31943000	45767000	29305000	43852000	5	5	3
SPBP26C9.02c|car1|II|arginase	SPBP26C9.02c|car1|II|arginase	6	1	1	>SPBP26C9.02c|car1|II|arginase Car1	1	6	1	1	5	4	4	3	1	0	1	0	1	0	1	0	14.2	2.8	2.8	35.72	323	323	0	3.5466	By MS/MS	By matching	By matching	By matching	13.9	8	10.5	5.6	13115000	6346600	0	6768000	0	0	0	5606100	0	1	0	0
SPBP35G2.07|ilv1|II|acetolactate	SPBP35G2.07|ilv1|II|acetolactate	16	16	16	>SPBP35G2.07|ilv1|II|acetolactate synthase catalytic subunit	1	16	16	16	16	16	16	15	16	16	16	15	16	16	16	15	28.1	28.1	28.1	73.193	669	669	0	110.64	By MS/MS	By MS/MS	By MS/MS	By MS/MS	28.1	28.1	28.1	25.6	1115600000	304420000	321910000	224800000	264460000	252580000	270700000	184680000	254850000	20	21	17
SPBP35G2.14|puf2|II|pumilio	SPBP35G2.14|puf2|II|pumilio	4	4	4	>SPBP35G2.14|puf2|II|pumilio family RNA-binding protein Puf2	1	4	4	4	4	3	2	3	4	3	2	3	4	3	2	3	4.2	4.2	4.2	114.23	1065	1065	0	11.09	By MS/MS	By MS/MS	By matching	By MS/MS	4.2	3.1	2.3	3.3	32402000	11718000	7493100	6899500	6291600	6708400	8049100	6732000	6803800	3	2	0
SPBP4H10.08|qcr10|II|Reiske	SPBP4H10.08|qcr10|II|Reiske	1	1	1	>SPBP4H10.08|qcr10|II|Reiske ISP-associated protein, ubiquinol-cytochrome-c reductase complex subunit Qcr10 (predicted)	1	1	1	1	1	1	1	1	1	1	1	1	1	1	1	1	19	19	19	9.1247	79	79	0	4.9392	By MS/MS	By MS/MS	By MS/MS	By MS/MS	19	19	19	19	18889000	4376200	4634300	5645400	4232700	0	0	0	4232700	1	1	1
SPBP4H10.11c|lcf2|II|long-chain-fatty-acid-CoA	SPBP4H10.11c|lcf2|II|long-chain-fatty-acid-CoA	10	10	10	>SPBP4H10.11c|lcf2|II|long-chain-fatty-acid-CoA ligase	1	10	10	10	9	6	6	6	9	6	6	6	9	6	6	6	18.7	18.7	18.7	75.79	689	689	0	34.106	By MS/MS	By MS/MS	By MS/MS	By MS/MS	15.5	8.6	10.2	9.7	121280000	33196000	31471000	27699000	28917000	23454000	25855000	26883000	30769000	7	6	6
SPBP4H10.15|aco2|II|aconitate	SPBP4H10.15|aco2|II|aconitate	9	9	9	>SPBP4H10.15|aco2|II|aconitate hydratase/mitochondrial ribosomal protein subunit L21, fusion protein	1	9	9	9	7	5	6	9	7	5	6	9	7	5	6	9	14.6	14.6	14.6	99.9	918	918	0	63.718	By MS/MS	By MS/MS	By MS/MS	By MS/MS	12.1	8.3	10.7	14.6	126990000	33396000	33287000	29656000	30650000	25052000	33738000	24401000	28880000	6	6	6
SPBP4H10.20|nhm1|II|m7G(5')pppN	SPBP4H10.20|nhm1|II|m7G(5')pppN	8	8	8	>SPBP4H10.20|nhm1|II|m7G(5)pppN diphosphatase Nhm1	1	8	8	8	7	8	6	6	7	8	6	6	7	8	6	6	25.3	25.3	25.3	35.106	304	304	0	25.59	By MS/MS	By MS/MS	By MS/MS	By MS/MS	23	25.3	20.1	22	81873000	23050000	22294000	14396000	22132000	17392000	17433000	15075000	22804000	5	7	5
SPBP8B7.02|rng9|II|contractile	SPBP8B7.02|rng9|II|contractile	9	9	9	>SPBP8B7.02|rng9|II|contractile ring myosin V regulator Rng9	1	9	9	9	9	6	8	5	9	6	8	5	9	6	8	5	54.4	54.4	54.4	30.025	261	261	0	103.75	By MS/MS	By MS/MS	By MS/MS	By MS/MS	54.4	34.5	49.4	30.7	376830000	120820000	68130000	100480000	87394000	81962000	74023000	76217000	95846000	13	8	9
SPBP8B7.03c|rpl402|II|60S	SPBP8B7.03c|rpl402|II|60S	9	9	4	>SPBP8B7.03c|rpl402|II|60S ribosomal protein L4 (predicted)	1	9	9	4	8	8	7	7	8	8	7	7	3	3	2	2	28.9	28.9	11.6	39.767	363	363	0	48.419	By MS/MS	By MS/MS	By MS/MS	By MS/MS	28.7	28.7	26.4	23.7	275080000	74009000	83125000	64298000	53648000	56727000	69075000	52119000	63174000	6	6	5
SPBP8B7.05c|nce103|II|carbonic	SPBP8B7.05c|nce103|II|carbonic	2	2	2	>SPBP8B7.05c|nce103|II|carbonic anhydrase (predicted)	1	2	2	2	1	2	1	2	1	2	1	2	1	2	1	2	8.5	8.5	8.5	37.009	328	328	0	6.7629	By MS/MS	By MS/MS	By MS/MS	By MS/MS	5.5	8.5	5.5	8.5	62002000	14215000	20294000	12478000	15015000	0	18542000	0	14231000	1	1	1
SPBP8B7.17c|SPBP8B7.17c|II|phosphomethylpyrimidine	SPBP8B7.17c|SPBP8B7.17c|II|phosphomethylpyrimidine	2	2	2	>SPBP8B7.17c|SPBP8B7.17c|II|phosphomethylpyrimidine kinase (predicted)	1	2	2	2	2	2	1	2	2	2	1	2	2	2	1	2	4.3	4.3	4.3	55.753	506	506	0	5.666	By MS/MS	By MS/MS	By MS/MS	By MS/MS	4.3	4.3	2.8	4.3	27134000	10130000	6285800	4638600	6079700	7819600	6257300	0	5913900	2	1	1
SPBP8B7.18c|SPBP8B7.18c|II|phosphomethylpyrimidine	SPBP8B7.18c|SPBP8B7.18c|II|phosphomethylpyrimidine	19	19	19	>SPBP8B7.18c|SPBP8B7.18c|II|phosphomethylpyrimidine kinase (predicted)	1	19	19	19	15	14	15	15	15	14	15	15	15	14	15	15	41.7	41.7	41.7	61.354	551	551	0	240.18	By MS/MS	By MS/MS	By MS/MS	By MS/MS	35.9	31.6	37.2	33.9	657270000	161030000	182100000	163050000	151080000	123170000	169250000	119770000	167010000	14	15	12
SPBP8B7.21|ubp3|II|ubiquitin	SPBP8B7.21|ubp3|II|ubiquitin	3	3	3	>SPBP8B7.21|ubp3|II|ubiquitin C-terminal hydrolase Ubp3	1	3	3	3	1	1	3	1	1	1	3	1	1	1	3	1	6.2	6.2	6.2	58.081	512	512	0	14.036	By MS/MS	By MS/MS	By MS/MS	By MS/MS	2.3	2.3	6.2	2.3	19348000	0	6922300	7280000	5145600	0	0	6030200	0	1	1	3
SPBP8B7.22|erd2|II|HDEL	SPBP8B7.22|erd2|II|HDEL	2	2	2	>SPBP8B7.22|erd2|II|HDEL receptor (predicted)	1	2	2	2	1	2	1	1	1	2	1	1	1	2	1	1	8	8	8	24.724	212	212	0	4.0836	By MS/MS	By MS/MS	By MS/MS	By MS/MS	3.3	8	3.3	3.3	11655000	1908900	6327700	1925300	1493100	0	5536800	0	0	1	2	1
SPBP8B7.25|cyp4|II|cyclophilin	SPBP8B7.25|cyp4|II|cyclophilin	2	2	2	>SPBP8B7.25|cyp4|II|cyclophilin family peptidyl-prolyl cis-trans isomerase Cyp4 (predicted)	1	2	2	2	2	1	2	2	2	1	2	2	2	1	2	2	9.5	9.5	9.5	22.156	201	201	0	5.3907	By MS/MS	By MS/MS	By MS/MS	By MS/MS	9.5	5.5	9.5	9.5	24617000	9106400	2972700	6257400	6280400	7802000	0	5347200	5875800	2	1	1
SPBPB21E7.07|aes1|II|enhancer	SPBPB21E7.07|aes1|II|enhancer	1	1	1	>SPBPB21E7.07|aes1|II|enhancer of RNA-mediated gene silencing	1	1	1	1	1	0	0	0	1	0	0	0	1	0	0	0	4.7	4.7	4.7	32.228	296	296	0	19.631	By MS/MS	By matching	By matching	By matching	4.7	0	0	0	0	0	0	0	0	0	0	0	0	1	0	0
SPBPB7E8.02|SPBPB7E8.02|II|PSP1	SPBPB7E8.02|SPBPB7E8.02|II|PSP1	3	3	3	>SPBPB7E8.02|SPBPB7E8.02|II|PSP1 family protein	1	3	3	3	3	3	2	2	3	3	2	2	3	3	2	2	7.7	7.7	7.7	82.21	749	749	0	13.684	By MS/MS	By MS/MS	By MS/MS	By MS/MS	7.7	7.7	4.8	4.8	48907000	19325000	9675600	12896000	7010000	12939000	8318500	12801000	8146300	2	4	1
SPBPJ4664.04|cop1|II|coatomer	SPBPJ4664.04|cop1|II|coatomer	55	55	55	>SPBPJ4664.04|cop1|II|coatomer alpha subunit Cop1 (predicted)	1	55	55	55	47	46	47	48	47	46	47	48	47	46	47	48	60.8	60.8	60.8	136.37	1207	1207	0	323.31	By MS/MS	By MS/MS	By MS/MS	By MS/MS	51.9	51	51	53.9	3138000000	691380000	842050000	702340000	902240000	551620000	721450000	571180000	885760000	44	48	49
SPBPJ4664.05|SPBPJ4664.05|II|conserved	SPBPJ4664.05|SPBPJ4664.05|II|conserved	1	1	1	>SPBPJ4664.05|SPBPJ4664.05|II|conserved fungal protein	1	1	1	1	1	0	0	0	1	0	0	0	1	0	0	0	6.7	6.7	6.7	25.21	223	223	0.0016051	2.7557	By MS/MS	By matching	By matching	By matching	6.7	0	0	0	0	0	0	0	0	0	0	0	0	1	0	0
SPCC1020.03|mmt1|III|mitochondrial	SPCC1020.03|mmt1|III|mitochondrial	3	3	3	>SPCC1020.03|mmt1|III|mitochondrial iron ion transmembrane transporter Mmt1 (predicted)	1	3	3	3	2	1	3	2	2	1	3	2	2	1	3	2	7.8	7.8	7.8	43.225	397	397	0	10.577	By MS/MS	By MS/MS	By MS/MS	By MS/MS	4.3	2.3	7.8	4.3	19785000	8135500	5583900	0	6066100	6859600	0	0	5961700	1	1	3
SPCC1020.06c|tal1|III|transaldolase	SPCC1020.06c|tal1|III|transaldolase	7	7	7	>SPCC1020.06c|tal1|III|transaldolase (predicted)	1	7	7	7	6	5	7	3	6	5	7	3	6	5	7	3	30.1	30.1	30.1	35.238	322	322	0	38.976	By MS/MS	By MS/MS	By MS/MS	By MS/MS	26.4	22.7	30.1	10.6	167500000	58144000	40211000	44895000	24250000	39593000	40447000	31711000	33151000	7	4	7
SPCC1020.10|oca2|III|serine/threonine	SPCC1020.10|oca2|III|serine/threonine	11	11	11	>SPCC1020.10|oca2|III|serine/threonine protein kinase Oca2	1	11	11	11	9	11	7	10	9	11	7	10	9	11	7	10	22.8	22.8	22.8	73.231	650	650	0	88.691	By MS/MS	By MS/MS	By MS/MS	By MS/MS	22.5	22.8	16.8	19.2	301960000	89783000	63345000	79180000	69648000	71421000	47648000	77602000	68541000	9	10	7
SPCC1183.01|sec15|III|exocyst	SPCC1183.01|sec15|III|exocyst	2	2	2	>SPCC1183.01|sec15|III|exocyst complex subunit Sec15 (predicted)	1	2	2	2	1	1	2	1	1	1	2	1	1	1	2	1	3.3	3.3	3.3	88.549	768	768	0.0023772	2.5814	By MS/MS	By matching	By MS/MS	By MS/MS	2.1	2.1	3.3	2.1	4915500	1280200	1191500	1056600	1387200	0	0	0	1387200	1	0	2
SPCC1183.02|SPCC1183.02|III|glutathione	SPCC1183.02|SPCC1183.02|III|glutathione	3	3	3	>SPCC1183.02|SPCC1183.02|III|glutathione S-transferase, translational elongation factor eEF1 (predicted)	1	3	3	3	2	3	1	2	2	3	1	2	2	3	1	2	17.3	17.3	17.3	25.503	220	220	0	9.2084	By MS/MS	By MS/MS	By MS/MS	By MS/MS	10.5	17.3	4.5	11.4	41203000	7098800	14971000	7231600	11902000	7205800	11788000	0	0	2	2	1
SPCC1183.07|rrp5|III|U3	SPCC1183.07|rrp5|III|U3	2	2	2	>SPCC1183.07|rrp5|III|U3 snoRNP-associated protein Rrp5 (predicted)	1	2	2	2	2	1	1	1	2	1	1	1	2	1	1	1	1.4	1.4	1.4	187.52	1690	1690	0	4.2207	By MS/MS	By MS/MS	By MS/MS	By MS/MS	1.4	0.5	0.5	0.5	48129000	43114000	1634500	1834600	1545900	27113000	0	0	0	2	0	1
SPCC1183.08c|rpl101|III|60S	SPCC1183.08c|rpl101|III|60S	7	7	4	>SPCC1183.08c|rpl101|III|60S ribosomal protein L10a	1	7	7	4	6	6	5	5	6	6	5	5	3	4	2	3	41.7	41.7	25.5	23.917	216	216	0	37.175	By MS/MS	By MS/MS	By MS/MS	By MS/MS	35.2	35.2	25	25	292150000	80182000	74440000	81923000	55606000	57394000	60662000	72439000	64684000	6	7	4
SPCC1183.11|msy1|III|MS	SPCC1183.11|msy1|III|MS	2	2	2	>SPCC1183.11|msy1|III|MS calcium ion channel protein Msy1	1	2	2	2	1	2	2	1	1	2	2	1	1	2	2	1	2.3	2.3	2.3	114.27	1011	1011	0	5.5215	By matching	By MS/MS	By MS/MS	By MS/MS	1.2	2.3	2.3	1.1	16351000	3409100	5472200	6139300	1330800	0	4742000	5131600	0	0	1	2
SPCC11E10.01|SPCC11E10.01|III|cystathionine	SPCC11E10.01|SPCC11E10.01|III|cystathionine	7	7	7	>SPCC11E10.01|SPCC11E10.01|III|cystathionine beta-lyase (predicted)	1	7	7	7	5	5	7	5	5	5	7	5	5	5	7	5	25.4	25.4	25.4	42.773	390	390	0	40.683	By MS/MS	By MS/MS	By MS/MS	By MS/MS	21	19.2	25.4	18.5	101680000	22711000	22824000	24730000	31414000	18750000	24200000	20211000	27568000	4	4	6
SPCC11E10.07c|tif221|III|translation	SPCC11E10.07c|tif221|III|translation	1	1	1	>SPCC11E10.07c|tif221|III|translation initiation factor eIF2B alpha subunit	1	1	1	1	1	1	1	1	1	1	1	1	1	1	1	1	3.2	3.2	3.2	37.773	341	341	0.0023904	2.6324	By matching	By matching	By matching	By MS/MS	3.2	3.2	3.2	3.2	7521700	2010500	1757100	2126100	1628000	0	0	0	1628000	0	0	0
SPCC1223.01|SPCC1223.01|III|ubiquitin-protein	SPCC1223.01|SPCC1223.01|III|ubiquitin-protein	6	6	6	>SPCC1223.01|SPCC1223.01|III|ubiquitin-protein ligase E3 (predicted)	1	6	6	6	5	2	5	4	5	2	5	4	5	2	5	4	10	10	10	82.699	732	732	0	24.466	By MS/MS	By MS/MS	By MS/MS	By MS/MS	8.1	4.6	9	6.7	46872000	14915000	7040600	14154000	10763000	10082000	9790200	11167000	9992300	4	2	6
SPCC1223.02|nmt1|III|4-amino-5-hydroxymethyl-2-methylpyrimidine	SPCC1223.02|nmt1|III|4-amino-5-hydroxymethyl-2-methylpyrimidine	13	13	13	>SPCC1223.02|nmt1|III|4-amino-5-hydroxymethyl-2-methylpyrimidine phosphate synthase Nmt1	1	13	13	13	12	11	13	11	12	11	13	11	12	11	13	11	50.3	50.3	50.3	38.965	346	346	0	225.53	By MS/MS	By MS/MS	By MS/MS	By MS/MS	48.3	45.1	50.3	45.1	1065300000	266060000	253930000	285740000	259590000	198480000	230070000	203750000	265440000	13	13	13
SPCC1223.06|tea1|III|cell	SPCC1223.06|tea1|III|cell	2	2	2	>SPCC1223.06|tea1|III|cell end marker Tea1	1	2	2	2	2	2	2	2	2	2	2	2	2	2	2	2	2.5	2.5	2.5	127.43	1147	1147	0	6.3447	By MS/MS	By matching	By MS/MS	By MS/MS	2.5	2.5	2.5	2.5	24204000	5091600	5269700	7278500	6564100	0	0	0	6564100	1	0	1
SPCC1223.07c|drs1|III|cytoplasmic	SPCC1223.07c|drs1|III|cytoplasmic	8	8	8	>SPCC1223.07c|drs1|III|cytoplasmic aspartate-tRNA ligase Drs1 (predicted)	1	8	8	8	7	5	4	5	7	5	4	5	7	5	4	5	14.8	14.8	14.8	66.67	580	580	0	30.78	By MS/MS	By MS/MS	By MS/MS	By MS/MS	12.6	10.3	6.4	10.5	155140000	37259000	53709000	22510000	41658000	29034000	37610000	37562000	34031000	7	4	4
SPCC1223.08c|dfr1|III|dihydrofolate	SPCC1223.08c|dfr1|III|dihydrofolate	12	12	12	>SPCC1223.08c|dfr1|III|dihydrofolate reductase/ serine hydrolase family fusion protein Dfr1	1	12	12	12	10	8	10	9	10	8	10	9	10	8	10	9	35.4	35.4	35.4	51.522	461	461	0	63.027	By MS/MS	By MS/MS	By MS/MS	By MS/MS	30.6	24.1	28.9	25.2	623490000	159940000	153250000	176400000	133900000	125030000	131960000	150760000	131160000	9	7	10
SPCC1223.09|SPCC1223.09|III|uricase	SPCC1223.09|SPCC1223.09|III|uricase	9	9	9	>SPCC1223.09|SPCC1223.09|III|uricase (predicted)	1	9	9	9	8	4	8	5	8	4	8	5	8	4	8	5	36.5	36.5	36.5	33.61	296	296	0	60.21	By MS/MS	By MS/MS	By MS/MS	By MS/MS	32.8	13.9	31.8	19.3	207640000	96017000	14148000	84737000	12742000	74587000	14092000	68001000	18358000	9	1	7
SPCC1223.11|ptc2|III|protein	SPCC1223.11|ptc2|III|protein	1	1	1	>SPCC1223.11|ptc2|III|protein phosphatase 2C Ptc2	1	1	1	1	1	1	0	1	1	1	0	1	1	1	0	1	3.2	3.2	3.2	40.878	370	370	0	3.3419	By MS/MS	By MS/MS	By matching	By matching	3.2	3.2	0	3.2	17506000	3467300	6649600	0	7389100	0	0	0	7389100	1	1	0
SPCC1235.02|bio2|III|biotin	SPCC1235.02|bio2|III|biotin	3	3	3	>SPCC1235.02|bio2|III|biotin synthase	1	3	3	3	2	2	3	2	2	2	3	2	2	2	3	2	9.4	9.4	9.4	40.65	363	363	0	16.448	By MS/MS	By MS/MS	By MS/MS	By MS/MS	5.2	5.2	9.4	5.2	25627000	5214400	8369400	4648200	7395400	4376100	7356300	3890700	7275500	2	2	2
SPCC1235.10c|sec6|III|exocyst	SPCC1235.10c|sec6|III|exocyst	3	3	3	>SPCC1235.10c|sec6|III|exocyst complex subunit Sec6	1	3	3	3	2	2	2	2	2	2	2	2	2	2	2	2	2.9	2.9	2.9	85.853	752	752	0	4.2634	By matching	By MS/MS	By MS/MS	By MS/MS	1.9	1.9	2	1.9	15150000	3569800	4064600	4515000	3000100	0	0	3739900	0	0	1	1
SPCC1235.11|mpc1|III|mitochondrial	SPCC1235.11|mpc1|III|mitochondrial	1	1	1	>SPCC1235.11|mpc1|III|mitochondrial pyruvate transmembrane transporter subunit Mpc1 (predicted)	1	1	1	1	0	1	1	1	0	1	1	1	0	1	1	1	5.7	5.7	5.7	16.055	141	141	0	3.151	By matching	By MS/MS	By MS/MS	By MS/MS	0	5.7	5.7	5.7	4950400	0	2564300	2386100	0	0	0	1976500	0	0	1	1
SPCC1235.14|ght5|III|hexose	SPCC1235.14|ght5|III|hexose	7	7	7	>SPCC1235.14|ght5|III|hexose transmembrane transporter Ght5	1	7	7	7	6	6	4	6	6	6	4	6	6	6	4	6	11.2	11.2	11.2	60.32	546	546	0	28.637	By MS/MS	By MS/MS	By MS/MS	By MS/MS	10.4	11.2	9.2	11.2	371580000	106950000	124270000	45878000	94483000	96153000	109150000	43555000	81172000	5	5	3
SPCC1235.15|dga1|III|diacylglycerol	SPCC1235.15|dga1|III|diacylglycerol	1	1	1	>SPCC1235.15|dga1|III|diacylglycerol O-acyltransferase Dga1	1	1	1	1	0	1	0	1	0	1	0	1	0	1	0	1	4.3	4.3	4.3	39.485	345	345	0.0038911	2.4129	By matching	By matching	By matching	By MS/MS	0	4.3	0	4.3	6186100	0	2807900	0	3378200	0	0	0	3378200	0	0	0
SPCC1259.02c|erm1|III|Endoplasmic	SPCC1259.02c|erm1|III|Endoplasmic	5	5	5	>SPCC1259.02c|erm1|III|Endoplasmic Reticulum metallopeptidase Erm1 (predicted)	1	5	5	5	4	5	5	4	4	5	5	4	4	5	5	4	7.5	7.5	7.5	91.841	822	822	0	24.084	By MS/MS	By MS/MS	By MS/MS	By MS/MS	6.1	7.5	7.5	6.1	90006000	16852000	31416000	24596000	17141000	18588000	20909000	17047000	17790000	3	4	5
SPCC1259.09c|pdx1|III|pyruvate	SPCC1259.09c|pdx1|III|pyruvate	3	3	3	>SPCC1259.09c|pdx1|III|pyruvate dehydrogenase protein x component, Pdx1 (predicted)	1	3	3	3	3	1	1	1	3	1	1	1	3	1	1	1	9	9	9	50.883	456	456	0	7.234	By MS/MS	By MS/MS	By matching	By MS/MS	9	3.3	3.3	3.3	16163000	6897800	3399900	2099100	3766100	5727400	0	0	0	3	1	0
SPCC126.08c|SPCC126.08c|III|lectin	SPCC126.08c|SPCC126.08c|III|lectin	1	1	1	>SPCC126.08c|SPCC126.08c|III|lectin family glycoprotein receptor (predicted)	1	1	1	1	0	1	1	0	0	1	1	0	0	1	1	0	6.1	6.1	6.1	35.128	312	312	0	4.5701	By matching	By MS/MS	By MS/MS	By matching	0	6.1	6.1	0	2807000	0	0	2807000	0	0	0	2325100	0	0	1	1
SPCC126.09|zip2|III|vacuolar	SPCC126.09|zip2|III|vacuolar	3	3	3	>SPCC126.09|zip2|III|vacuolar membrane zinc transmembrane transporter (predicted)	1	3	3	3	2	1	1	2	2	1	1	2	2	1	1	2	7.7	7.7	7.7	42.876	389	389	0	7.1705	By MS/MS	By MS/MS	By MS/MS	By MS/MS	5.1	2.1	2.1	4.6	27243000	9644800	5708400	7316100	4573500	8008300	0	0	0	2	1	1
SPCC1281.01|ags1|III|alpha;SPBC16D10.05|mok13|II|alpha-1,3-glucan	SPCC1281.01|ags1|III|alpha	11;1	11;1	11;1	>SPCC1281.01|ags1|III|alpha glucan synthase Ags1	2	11	11	11	6	9	7	8	6	9	7	8	6	9	7	8	5.2	5.2	5.2	272.12	2410	2410;2358	0	26.444	By MS/MS	By MS/MS	By MS/MS	By MS/MS	3	4.4	3.1	4	108270000	20350000	33819000	23671000	30426000	21282000	25884000	22017000	27338000	4	8	5
SPCC1281.06c|ole1|III|acyl-coA	SPCC1281.06c|ole1|III|acyl-coA	16	16	16	>SPCC1281.06c|ole1|III|acyl-coA desaturase (predicted)	1	16	16	16	11	11	13	10	11	11	13	10	11	11	13	10	51.1	51.1	51.1	54.438	479	479	0	181.69	By MS/MS	By MS/MS	By MS/MS	By MS/MS	35.1	37.8	43.8	33.8	1292400000	326980000	349990000	309020000	306450000	279630000	241380000	241920000	284410000	10	14	15
SPCC132.04c|gdh2|III|NAD-dependent	SPCC132.04c|gdh2|III|NAD-dependent	30	30	30	>SPCC132.04c|gdh2|III|NAD-dependent glutamate dehydrogenase Gdh2 (predicted)	1	30	30	30	21	23	25	20	21	23	25	20	21	23	25	20	34.5	34.5	34.5	125.71	1106	1106	0	153.92	By MS/MS	By MS/MS	By MS/MS	By MS/MS	25.5	26.5	28.8	23.4	806350000	168760000	247170000	178910000	211520000	131380000	216270000	136050000	227890000	20	21	20
SPCC1322.04|fyu1|III|UTP-glucose-1-phosphate	SPCC1322.04|fyu1|III|UTP-glucose-1-phosphate	18	18	18	>SPCC1322.04|fyu1|III|UTP-glucose-1-phosphate uridylyltransferase Fyu1	1	18	18	18	17	16	15	12	17	16	15	12	17	16	15	12	56.3	56.3	56.3	56.429	506	506	0	121.61	By MS/MS	By MS/MS	By MS/MS	By MS/MS	52.4	50.8	42.7	41.3	629670000	183340000	176980000	145970000	123370000	131500000	157350000	120160000	131150000	15	17	14
SPCC1322.05c|lap2|III|vacuolar	SPCC1322.05c|lap2|III|vacuolar	6	6	6	>SPCC1322.05c|lap2|III|vacuolar aminopeptidase	1	6	6	6	4	6	2	4	4	6	2	4	4	6	2	4	13.7	13.7	13.7	69.521	612	612	0	15.397	By MS/MS	By MS/MS	By matching	By MS/MS	10	13.7	3.4	10	47088000	11276000	16510000	4697300	14605000	10167000	11042000	0	17205000	3	5	0
SPCC1322.06|kap113|III|karyopherin	SPCC1322.06|kap113|III|karyopherin	2	2	2	>SPCC1322.06|kap113|III|karyopherin Kap113	1	2	2	2	2	0	1	0	2	0	1	0	2	0	1	0	2.4	2.4	2.4	112.93	983	983	0	4.4796	By MS/MS	By matching	By MS/MS	By matching	2.4	0	1.1	0	3313300	1732700	0	1580500	0	0	0	1309200	0	2	0	1
SPCC1322.08|srk1|III|MAPK-activated	SPCC1322.08|srk1|III|MAPK-activated	5	5	5	>SPCC1322.08|srk1|III|MAPK-activated protein kinase Srk1	1	5	5	5	2	4	3	4	2	4	3	4	2	4	3	4	10.3	10.3	10.3	66.135	580	580	0	15.906	By MS/MS	By MS/MS	By MS/MS	By MS/MS	3.6	8.6	6	8.6	28604000	3460600	9467700	6371500	9303700	0	9117600	5745900	8002300	0	3	1
SPCC1322.13|ade6|III|phosphoribosylaminoimidazole	SPCC1322.13|ade6|III|phosphoribosylaminoimidazole	5	5	5	>SPCC1322.13|ade6|III|phosphoribosylaminoimidazole carboxylase Ade6	1	5	5	5	3	4	4	3	3	4	4	3	3	4	4	3	11.8	11.8	11.8	60.013	552	552	0	38.801	By MS/MS	By MS/MS	By MS/MS	By MS/MS	6.3	9.6	8.5	6.3	49078000	14113000	14641000	8919300	11405000	10731000	11282000	10628000	10682000	1	2	3
SPCC1322.14c|vtc4|III|vacuolar	SPCC1322.14c|vtc4|III|vacuolar	18	18	18	>SPCC1322.14c|vtc4|III|vacuolar transporter chaperone (VTC) complex subunit (predicted)	1	18	18	18	10	13	15	14	10	13	15	14	10	13	15	14	26.8	26.8	26.8	83.634	721	721	0	96.327	By MS/MS	By MS/MS	By MS/MS	By MS/MS	15.3	18.4	23.4	19.6	266520000	65628000	67131000	74052000	59714000	54276000	56866000	61640000	61505000	9	10	13
SPCC1393.13|SPCC1393.13|III|protein	SPCC1393.13|SPCC1393.13|III|protein	2	2	2	>SPCC1393.13|SPCC1393.13|III|protein carboxyl methyltransferase, implicated in DNA damage response	1	2	2	2	1	2	0	2	1	2	0	2	1	2	0	2	3.6	3.6	3.6	50.117	442	442	0.00082034	2.9924	By matching	By MS/MS	By matching	By MS/MS	1.6	3.6	0	3.6	8987900	1713000	3818600	0	3456400	0	0	0	3456400	0	0	0
SPCC13B11.01|adh1|III|alcohol	SPCC13B11.01|adh1|III|alcohol	22	22	22	>SPCC13B11.01|adh1|III|alcohol dehydrogenase Adh1	1	22	22	22	22	21	22	20	22	21	22	20	22	21	22	20	70	70	70	37.396	350	350	0	323.31	By MS/MS	By MS/MS	By MS/MS	By MS/MS	70	66	70	63.4	20531000000	5147000000	6124000000	4711100000	4548500000	3849400000	4969000000	3376900000	4859300000	53	50	48
SPCC1442.08c|cox12|III|cytochrome	SPCC1442.08c|cox12|III|cytochrome	1	1	1	>SPCC1442.08c|cox12|III|cytochrome c oxidase subunit VIb (predicted)	1	1	1	1	1	1	1	1	1	1	1	1	1	1	1	1	14	14	14	10.264	86	86	0	3.4136	By MS/MS	By MS/MS	By MS/MS	By matching	14	14	14	14	20002000	4842300	4144500	3970600	7044300	0	0	0	7044300	1	1	1
SPCC1442.09|trp3|III|anthranilate	SPCC1442.09|trp3|III|anthranilate	3	3	3	>SPCC1442.09|trp3|III|anthranilate synthase component I (predicted)	1	3	3	3	3	3	2	3	3	3	2	3	3	3	2	3	6.5	6.5	6.5	54.959	489	489	0	9.6391	By MS/MS	By MS/MS	By MS/MS	By MS/MS	6.5	6.5	4.5	6.5	35330000	10169000	9349900	5431500	10379000	7691500	6901800	6104700	10805000	1	2	0
SPCC1442.12|pps1|III|phosphatidylserine	SPCC1442.12|pps1|III|phosphatidylserine	2	2	2	>SPCC1442.12|pps1|III|phosphatidylserine synthase Pps1	1	2	2	2	1	1	1	0	1	1	1	0	1	1	1	0	7.9	7.9	7.9	26.525	240	240	0	4.2557	By MS/MS	By MS/MS	By MS/MS	By matching	3.8	4.2	3.8	0	11489000	4257600	4105300	3126500	0	0	0	2589800	0	1	0	1
SPCC1442.14c|hnt1|III|adenosine	SPCC1442.14c|hnt1|III|adenosine	1	1	1	>SPCC1442.14c|hnt1|III|adenosine 5-monophosphoramidase (predicted)	1	1	1	1	1	1	0	1	1	1	0	1	1	1	0	1	11.3	11.3	11.3	14.58	133	133	0	11.291	By MS/MS	By MS/MS	By matching	By MS/MS	11.3	11.3	0	11.3	21863000	8246200	6631200	0	6985700	0	0	0	6985700	1	1	0
SPCC1442.16c|zta1|III|NADPH	SPCC1442.16c|zta1|III|NADPH	5	5	5	>SPCC1442.16c|zta1|III|NADPH quinone oxidoreductase/ARE-binding protein (predicted)	1	5	5	5	4	3	3	5	4	3	3	5	4	3	3	5	18.5	18.5	18.5	34.947	329	329	0	12.319	By MS/MS	By MS/MS	By MS/MS	By MS/MS	14.6	10.3	10.3	18.5	39126000	10547000	6830400	7141400	14608000	7170200	7562700	8245400	12279000	3	2	1
SPCC1450.04|tef5|III|translation	SPCC1450.04|tef5|III|translation	3	3	3	>SPCC1450.04|tef5|III|translation elongation factor EF-1 beta subunit, guanyl-nucleotide exchange factor (eEF1B)	1	3	3	3	2	3	3	1	2	3	3	1	2	3	3	1	14.5	14.5	14.5	23.484	214	214	0	12.047	By MS/MS	By MS/MS	By MS/MS	By matching	8.9	14.5	14.5	4.7	31425000	9169000	7131200	11674000	3451100	8246200	6918800	8358000	0	2	3	3
SPCC1450.12|SPCC1450.12|III|PXA	SPCC1450.12|SPCC1450.12|III|PXA	5	5	5	>SPCC1450.12|SPCC1450.12|III|PXA domain protein	1	5	5	5	2	2	4	3	2	2	4	3	2	2	4	3	7.4	7.4	7.4	96.106	821	821	0	10.872	By MS/MS	By MS/MS	By MS/MS	By MS/MS	2.2	3.5	5.2	4.4	19880000	2323900	5429500	5502500	6624700	0	0	0	6624700	1	0	3
SPCC1450.15|SPCC1450.15|III|pig-F/3-ketosphinganine	SPCC1450.15|SPCC1450.15|III|pig-F/3-ketosphinganine	3	3	3	>SPCC1450.15|SPCC1450.15|III|pig-F/3-ketosphinganine reductase fusion protein (predicted)	1	3	3	3	2	3	1	1	2	3	1	1	2	3	1	1	7.3	7.3	7.3	55.643	494	494	0	8.2843	By MS/MS	By MS/MS	By MS/MS	By MS/MS	4.9	7.3	2.6	2.6	22776000	3494800	11835000	3368100	4078800	4434500	5092700	4283100	6315600	3	3	3
SPCC1494.04c|tyr1|III|prephenate	SPCC1494.04c|tyr1|III|prephenate	2	2	2	>SPCC1494.04c|tyr1|III|prephenate dehydrogenase [NADP+] Tyr1 (predicted)	1	2	2	2	1	2	0	2	1	2	0	2	1	2	0	2	6.3	6.3	6.3	48.905	431	431	0	7.2312	By MS/MS	By MS/MS	By matching	By MS/MS	3.7	6.3	0	6.3	9769200	0	5823000	0	3946200	0	5242800	0	3798600	1	2	0
SPCC1494.05c|ubp12|III|CSN-associated	SPCC1494.05c|ubp12|III|CSN-associated	2	2	2	>SPCC1494.05c|ubp12|III|CSN-associated deubiquitinating enzyme Ubp12	1	2	2	2	0	1	2	1	0	1	2	1	0	1	2	1	1.9	1.9	1.9	111.97	979	979	0	5.507	By matching	By MS/MS	By MS/MS	By MS/MS	0	1.1	1.9	1.1	6835000	0	3872100	2962900	0	0	0	2454300	0	0	1	1
SPCC1494.06c|dbp9|III|ATP-dependent	SPCC1494.06c|dbp9|III|ATP-dependent	2	2	2	>SPCC1494.06c|dbp9|III|ATP-dependent RNA helicase Dbp9 (predicted)	1	2	2	2	1	0	0	1	1	0	0	1	1	0	0	1	4	4	4	67.45	595	595	0	21.2	By MS/MS	By matching	By matching	By MS/MS	1.8	0	0	2.2	2858100	0	0	0	2858100	0	0	0	2858100	1	0	0
SPCC1494.07|trm72|III|tRNA	SPCC1494.07|trm72|III|tRNA	4	4	4	>SPCC1494.07|trm72|III|tRNA 2-O-methylase subunit Trm72 (predicted)	1	4	4	4	2	4	2	3	2	4	2	3	2	4	2	3	3.1	3.1	3.1	171.17	1502	1502	0	11.667	By MS/MS	By MS/MS	By MS/MS	By MS/MS	1.3	3.1	1.3	2.3	17825000	3428600	4359700	3520200	6516600	3262700	4376700	3348500	5106200	2	4	2
SPCC14G10.02|urb1|III|ribosome	SPCC14G10.02|urb1|III|ribosome	2	2	2	>SPCC14G10.02|urb1|III|ribosome biogenesis protein Urb1 (predicted)	1	2	2	2	2	1	2	0	2	1	2	0	2	1	2	0	1.4	1.4	1.4	179.23	1568	1568	0.0023962	2.6655	By MS/MS	By MS/MS	By MS/MS	By matching	1.4	0.6	1.4	0	6725200	3174500	1808600	1742100	0	2635900	0	0	0	1	1	1
SPCC14G10.04|SPCC14G10.04|III|Schizosaccharomyces	SPCC14G10.04|SPCC14G10.04|III|Schizosaccharomyces	2	2	2	>SPCC14G10.04|SPCC14G10.04|III|Schizosaccharomyces specific protein	1	2	2	2	2	1	0	0	2	1	0	0	2	1	0	0	5.8	5.8	5.8	52.624	497	497	0	6.624	By MS/MS	By matching	By matching	By matching	5.8	3.6	0	0	9962300	4694600	5267700	0	0	3898000	0	0	0	1	0	0
SPCC162.02c|SPCC162.02c|III|AMP-binding	SPCC162.02c|SPCC162.02c|III|AMP-binding	27	27	27	>SPCC162.02c|SPCC162.02c|III|AMP-binding dehydrogenase (predicted)	1	27	27	27	25	22	25	21	25	22	25	21	25	22	25	21	33.6	33.6	33.6	109.85	981	981	0	115.7	By MS/MS	By MS/MS	By MS/MS	By MS/MS	30.4	27	30.1	26.3	671600000	160640000	178580000	173020000	159370000	124960000	155900000	136450000	175010000	23	21	22
SPCC162.09c|hmg1|III|3-hydroxy-3-methylglutaryl-CoA	SPCC162.09c|hmg1|III|3-hydroxy-3-methylglutaryl-CoA	7	7	7	>SPCC162.09c|hmg1|III|3-hydroxy-3-methylglutaryl-CoA reductase Hmg1	1	7	7	7	6	6	5	4	6	6	5	4	6	6	5	4	7.7	7.7	7.7	114.88	1053	1053	0	23.735	By MS/MS	By MS/MS	By MS/MS	By MS/MS	6.6	6.6	5.2	4.3	86065000	22820000	22750000	21651000	18844000	15952000	19774000	17000000	22907000	6	7	5
SPCC162.11c|urk1|III|uridine	SPCC162.11c|urk1|III|uridine	8	8	8	>SPCC162.11c|urk1|III|uridine kinase/uracil phosphoribosyltransferase (predicted)	1	8	8	8	7	3	5	2	7	3	5	2	7	3	5	2	25.1	25.1	25.1	51.389	454	454	0	22.555	By MS/MS	By MS/MS	By MS/MS	By MS/MS	21.4	9.3	15.6	6.8	41861000	14939000	6748100	16480000	3693700	10005000	7734000	11332000	6581700	6	1	3
SPCC1620.06c|SPCC1620.06c|III|ribose-phosphate	SPCC1620.06c|SPCC1620.06c|III|ribose-phosphate	4	4	4	>SPCC1620.06c|SPCC1620.06c|III|ribose-phosphate pyrophosphokinase (predicted)	1	4	4	4	4	2	4	2	4	2	4	2	4	2	4	2	16.2	16.2	16.2	34.779	321	321	0	16.438	By MS/MS	By matching	By MS/MS	By MS/MS	16.2	8.1	16.2	8.1	78508000	27413000	12422000	28257000	10416000	19883000	0	26286000	0	2	0	2
SPCC1620.08|SPCC1620.08|III|succinate-CoA	SPCC1620.08|SPCC1620.08|III|succinate-CoA	3	3	3	>SPCC1620.08|SPCC1620.08|III|succinate-CoA ligase beta subunit (predicted)	1	3	3	3	3	1	1	1	3	1	1	1	3	1	1	1	9.2	9.2	9.2	47.287	433	433	0	9.1222	By MS/MS	By MS/MS	By MS/MS	By MS/MS	9.2	1.6	5.1	1.6	12515000	10466000	2049200	0	0	8689900	0	0	0	3	1	1
SPCC1620.11|nup97|III|nucleoporin	SPCC1620.11|nup97|III|nucleoporin	3	3	3	>SPCC1620.11|nup97|III|nucleoporin Nic96 homolog	1	3	3	3	2	0	1	0	2	0	1	0	2	0	1	0	4.5	4.5	4.5	97.563	851	851	0	6.8681	By MS/MS	By matching	By MS/MS	By matching	3.3	0	1.2	0	11504000	4674100	0	6830000	0	3881000	0	0	0	1	0	1
SPCC1620.14c|snf22|III|ATP-dependent	SPCC1620.14c|snf22|III|ATP-dependent	8	8	8	>SPCC1620.14c|snf22|III|ATP-dependent DNA helicase Snf22	1	8	8	8	7	5	4	4	7	5	4	4	7	5	4	4	6.5	6.5	6.5	189.91	1680	1680	0	44.369	By MS/MS	By MS/MS	By MS/MS	By MS/MS	5.7	4	3	3.2	82910000	34583000	15817000	16477000	16034000	23467000	13346000	16945000	18479000	6	4	1
SPCC1672.02c|sap1|III|switch-activating	SPCC1672.02c|sap1|III|switch-activating	5	5	5	>SPCC1672.02c|sap1|III|switch-activating protein Sap1	1	5	5	5	4	1	4	2	4	1	4	2	4	1	4	2	22.4	22.4	22.4	29.127	254	254	0	15.376	By MS/MS	By matching	By MS/MS	By MS/MS	17.3	5.5	16.9	10.6	151550000	39653000	24337000	55586000	31977000	38224000	0	41590000	31131000	4	0	2
SPCC1672.03c|gud1|III|guanine	SPCC1672.03c|gud1|III|guanine	6	6	6	>SPCC1672.03c|gud1|III|guanine deaminase Gud1 (predicted)	1	6	6	6	2	5	3	6	2	5	3	6	2	5	3	6	19.5	19.5	19.5	58.046	527	527	0	30.723	By MS/MS	By MS/MS	By MS/MS	By MS/MS	6.3	15.4	9.7	19.5	106010000	10229000	38835000	16476000	40466000	17268000	31525000	20101000	27696000	2	4	2
SPCC1672.05c|yrs1|III|cytoplasmic	SPCC1672.05c|yrs1|III|cytoplasmic	2	2	2	>SPCC1672.05c|yrs1|III|cytoplasmic tyrosine-tRNA ligase Yrs1 (predicted)	1	2	2	2	1	0	2	0	1	0	2	0	1	0	2	0	5.2	5.2	5.2	44.575	401	401	0	4.9048	By MS/MS	By matching	By MS/MS	By matching	3.2	0	5.2	0	8712300	6302300	0	2409900	0	5233000	0	0	0	1	0	2
SPCC1672.06c|asp1|III|inositol	SPCC1672.06c|asp1|III|inositol	3	3	3	>SPCC1672.06c|asp1|III|inositol hexakisphosphate kinase/inositol pyrophosphate synthase (predicted)	1	3	3	3	2	1	0	2	2	1	0	2	2	1	0	2	3.2	3.2	3.2	105.68	920	920	0	11.09	By MS/MS	By MS/MS	By matching	By MS/MS	2.2	1.1	0	2.1	2239600	0	2239600	0	0	0	1959700	0	0	2	1	0
SPCC1672.07|utp21|III|U3	SPCC1672.07|utp21|III|U3	5	5	5	>SPCC1672.07|utp21|III|U3 snoRNP-associated protein Utp21 (predicted)	1	5	5	5	2	4	2	3	2	4	2	3	2	4	2	3	6.7	6.7	6.7	100.57	902	902	0	9.5262	By MS/MS	By MS/MS	By MS/MS	By MS/MS	2.8	5.3	2.8	4.9	24947000	4196700	9761900	4018300	6970700	5261900	7165500	0	6569700	1	3	0
SPCC1672.11c|SPCC1672.11c|III|P-type	SPCC1672.11c|SPCC1672.11c|III|P-type	2	2	2	>SPCC1672.11c|SPCC1672.11c|III|P-type ATPase P5 type (predicted)	1	2	2	2	1	2	1	1	1	2	1	1	1	2	1	1	1.3	1.3	1.3	148.78	1315	1315	0	3.3068	By MS/MS	By MS/MS	By MS/MS	By matching	0.6	1.3	0.6	0.6	6853800	1194900	2903300	1568000	1187700	0	2540400	0	0	0	1	0
SPCC1682.01|qcr9|III|ubiquinol-cytochrome-c	SPCC1682.01|qcr9|III|ubiquinol-cytochrome-c	1	1	1	>SPCC1682.01|qcr9|III|ubiquinol-cytochrome-c reductase complex subunit 9 (predicted)	1	1	1	1	1	1	1	1	1	1	1	1	1	1	1	1	15.3	15.3	15.3	9.7879	85	85	0	8.9796	By MS/MS	By MS/MS	By MS/MS	By MS/MS	15.3	15.3	15.3	15.3	27992000	0	11338000	8587200	8066300	0	0	0	8066300	1	1	1
SPCC1682.02c|mcm3|III|MCM	SPCC1682.02c|mcm3|III|MCM	6	6	6	>SPCC1682.02c|mcm3|III|MCM complex subunit Mcm3	1	6	6	6	4	2	2	4	4	2	2	4	4	2	2	4	8.2	8.2	8.2	97.48	879	879	0	19.294	By MS/MS	By MS/MS	By MS/MS	By MS/MS	4.6	3.9	2.7	6.4	34752000	8101700	2269900	12721000	11659000	4683500	0	11465000	0	1	1	2
SPCC1682.05c|srp68|III|signal	SPCC1682.05c|srp68|III|signal	5	5	5	>SPCC1682.05c|srp68|III|signal recognition particle subunit (predicted)	1	5	5	5	3	4	3	3	3	4	3	3	3	4	3	3	8.5	8.5	8.5	67.859	597	597	0	20.381	By MS/MS	By MS/MS	By MS/MS	By MS/MS	5.5	6.4	4.9	4.9	26981000	2247500	9736100	8411600	6585600	0	7659000	8265500	6147900	2	2	2
SPCC1682.07|ssl1|III|transcription	SPCC1682.07|ssl1|III|transcription	3	3	3	>SPCC1682.07|ssl1|III|transcription factor TFIIH complex subunit Ssl1	1	3	3	3	1	1	1	2	1	1	1	2	1	1	1	2	7.8	7.8	7.8	47.066	421	421	0	9.3883	By MS/MS	By MS/MS	By MS/MS	By MS/MS	2.6	3.1	2.1	5.2	8103600	0	3355700	0	4747900	0	0	0	4747900	1	1	1
SPCC1682.10|rpn8|III|19S	SPCC1682.10|rpn8|III|19S	1	1	1	>SPCC1682.10|rpn8|III|19S proteasome regulatory subunit Rpn8 (predicted)	1	1	1	1	1	0	0	0	1	0	0	0	1	0	0	0	4.6	4.6	4.6	35.595	324	324	0	3.5251	By MS/MS	By matching	By matching	By matching	4.6	0	0	0	4349200	4349200	0	0	0	3611300	0	0	0	1	0	0
SPCC1682.16|rpt4|III|19S	SPCC1682.16|rpt4|III|19S	2	1	1	>SPCC1682.16|rpt4|III|19S proteasome regulatory subunit Rpt4 (predicted)	1	2	1	1	2	1	2	2	1	1	1	1	1	1	1	1	6.2	3.1	3.1	43.608	388	388	0.0097892	2.1098	By matching	By matching	By MS/MS	By matching	6.2	3.1	6.2	6.2	14146000	3589200	2945300	4985800	2625600	0	0	0	2625600	0	0	1
SPCC16A11.10c|oca8|III|cytochrome	SPCC16A11.10c|oca8|III|cytochrome	4	4	4	>SPCC16A11.10c|oca8|III|cytochrome b5 (predicted)	1	4	4	4	4	4	4	3	4	4	4	3	4	4	4	3	29.5	29.5	29.5	14.252	129	129	0	13.179	By MS/MS	By MS/MS	By MS/MS	By MS/MS	29.5	29.5	29.5	29.5	195170000	47404000	58341000	36813000	52610000	37460000	49756000	31055000	55242000	3	2	3
SPCC16C4.01|sif2|III|mitochondrial	SPCC16C4.01|sif2|III|mitochondrial	1	1	1	>SPCC16C4.01|sif2|III|mitochondrial conserved protein (predicted)	1	1	1	1	0	1	1	0	0	1	1	0	0	1	1	0	2.4	2.4	2.4	44.641	382	382	0.0023697	2.5451	By matching	By MS/MS	By matching	By matching	0	2.4	2.4	0	5192000	0	3005800	2186200	0	0	0	1810900	0	0	1	0
SPCC16C4.02c|SPCC16C4.02c|III|DUF1941	SPCC16C4.02c|SPCC16C4.02c|III|DUF1941	1	1	1	>SPCC16C4.02c|SPCC16C4.02c|III|DUF1941 family protein, human neurochondrin ortholog	1	1	1	1	0	1	0	1	0	1	0	1	0	1	0	1	2	2	2	63.036	548	548	0	6.197	By matching	By MS/MS	By matching	By MS/MS	0	2	0	2	4348600	0	0	0	4348600	0	0	0	4348600	0	1	0
SPCC16C4.03|pin1|III|peptidyl-prolyl	SPCC16C4.03|pin1|III|peptidyl-prolyl	4	4	4	>SPCC16C4.03|pin1|III|peptidyl-prolyl cis-trans isomerase Pin1	1	4	4	4	3	2	3	3	3	2	3	3	3	2	3	3	24.6	24.6	24.6	19.773	175	175	0	14.362	By MS/MS	By MS/MS	By MS/MS	By MS/MS	24.6	17.7	24.6	17.7	63733000	21543000	15660000	15238000	11293000	15896000	14256000	14808000	10545000	4	0	4
SPCC16C4.07|scw1|III|RNA-binding	SPCC16C4.07|scw1|III|RNA-binding	5	5	5	>SPCC16C4.07|scw1|III|RNA-binding protein Scw1	1	5	5	5	4	5	3	5	4	5	3	5	4	5	3	5	13.9	13.9	13.9	60.393	561	561	0	22.5	By MS/MS	By MS/MS	By MS/MS	By MS/MS	11.8	13.9	7	13.9	91581000	23026000	24771000	17734000	26050000	18510000	19324000	23046000	20653000	3	4	2
SPCC16C4.09|sts5|III|RNB-like	SPCC16C4.09|sts5|III|RNB-like	19	19	19	>SPCC16C4.09|sts5|III|RNB-like protein	1	19	19	19	16	12	14	11	16	12	14	11	16	12	14	11	23.2	23.2	23.2	117.6	1066	1066	0	148.94	By MS/MS	By MS/MS	By MS/MS	By MS/MS	18.4	16.7	17.9	13.9	406300000	126760000	90560000	104170000	84811000	86675000	84510000	83057000	101350000	14	11	13
SPCC16C4.11|pef1|III|Pho85/PhoA-like;SPBC18H10.15|cdk11|II|serine/threonine	SPCC16C4.11|pef1|III|Pho85/PhoA-like	3;1	2;0	2;0	>SPCC16C4.11|pef1|III|Pho85/PhoA-like cyclin-dependent kinase Pef1	2	3	2	2	2	2	1	2	1	1	0	1	1	1	0	1	9.4	6.6	6.6	32.736	288	288;398	0	3.636	By MS/MS	By MS/MS	By matching	By MS/MS	6.6	5.6	2.8	5.6	2697600	1263200	0	0	1434400	0	0	0	1434400	1	1	0
SPCC31H12.04c|rpl1202|III|60S;SPCC16C4.13c|rpl1201|III|60S	SPCC31H12.04c|rpl1202|III|60S;SPCC16C4.13c|rpl1201|III|60S	4;4	4;4	4;4	>SPCC31H12.04c|rpl1202|III|60S ribosomal protein L12.1/L12A;>SPCC16C4.13c|rpl1201|III|60S ribosomal protein L12.1/L12A	2	4	4	4	3	2	4	3	3	2	4	3	3	2	4	3	41.2	41.2	41.2	17.666	165	165;165	0	5.4181	By MS/MS	By matching	By MS/MS	By MS/MS	35.8	21.8	41.2	35.8	100700000	38748000	9049500	38458000	14441000	31185000	0	25727000	21559000	2	0	2
SPCC16C4.14c|sfc4|III|transcription	SPCC16C4.14c|sfc4|III|transcription	2	2	2	>SPCC16C4.14c|sfc4|III|transcription factor TFIIIC complex subunit Sfc4	1	2	2	2	1	1	2	0	1	1	2	0	1	1	2	0	1.9	1.9	1.9	116.4	1006	1006	0.0061444	2.2612	By matching	By matching	By MS/MS	By matching	1	1	1.9	0	7180800	1103200	378280	5699300	0	0	0	4720900	0	0	0	2
SPCC1739.12|ppe1|III|serine/threonine	SPCC1739.12|ppe1|III|serine/threonine	1	1	1	>SPCC1739.12|ppe1|III|serine/threonine protein phosphatase Ppe1	1	1	1	1	1	1	1	0	1	1	1	0	1	1	1	0	4.3	4.3	4.3	35.259	305	305	0	3.1742	By matching	By matching	By MS/MS	By matching	4.3	4.3	4.3	0	7120000	2860100	1557100	2702800	0	0	0	2238800	0	0	0	1
SPCC1739.13|ssa2|III|heat	SPCC1739.13|ssa2|III|heat	39	39	21	>SPCC1739.13|ssa2|III|heat shock protein Ssa2	1	39	39	21	39	38	39	36	39	38	39	36	21	21	21	19	59.2	59.2	32.6	70.232	647	647	0	323.31	By MS/MS	By MS/MS	By MS/MS	By MS/MS	59.2	57.8	59.2	57.8	19937000000	6209400000	4273900000	5404000000	4049700000	4646100000	3790800000	3928100000	4236300000	88	77	84
SPCC1739.14|npp106|III|nucleoporin	SPCC1739.14|npp106|III|nucleoporin	4	4	4	>SPCC1739.14|npp106|III|nucleoporin Npp106	1	4	4	4	3	2	0	1	3	2	0	1	3	2	0	1	4.5	4.5	4.5	105.71	933	933	0	12.244	By MS/MS	By MS/MS	By matching	By MS/MS	3	2.3	0	0.8	2430600	0	1354200	0	1076400	0	0	0	1076400	3	2	0
SPCC1795.02c|vcx1|III|CaCA	SPCC1795.02c|vcx1|III|CaCA	3	3	3	>SPCC1795.02c|vcx1|III|CaCA proton/calcium exchanger (predicted)	1	3	3	3	2	1	3	1	2	1	3	1	2	1	3	1	10.2	10.2	10.2	45.108	412	412	0	8.3294	By MS/MS	By matching	By MS/MS	By MS/MS	6.3	3.4	10.2	3.4	30686000	13003000	3283700	12313000	2085800	7658700	0	10188000	0	1	0	3
SPCC1795.03|gms1|III|UDP-galactose	SPCC1795.03|gms1|III|UDP-galactose	2	2	2	>SPCC1795.03|gms1|III|UDP-galactose transmembrane transporter Gms1	1	2	2	2	2	2	2	2	2	2	2	2	2	2	2	2	6.2	6.2	6.2	39.101	353	353	0	9.2298	By MS/MS	By MS/MS	By MS/MS	By MS/MS	6.2	6.2	6.2	6.2	68187000	15702000	17080000	21522000	13883000	0	0	0	13883000	0	1	1
SPCC1795.10c|SPCC1795.10c|III|Sed5	SPCC1795.10c|SPCC1795.10c|III|Sed5	2	2	2	>SPCC1795.10c|SPCC1795.10c|III|Sed5 Vesicle Protein Svp26 (predicted)	1	2	2	2	2	2	2	2	2	2	2	2	2	2	2	2	8.8	8.8	8.8	25.801	227	227	0	5.2688	By MS/MS	By MS/MS	By MS/MS	By MS/MS	8.8	8.8	8.8	8.8	26280000	6860600	7412100	6194900	5812700	5628300	6612000	5088200	5797800	1	2	0
SPCC1795.11|sum3|III|translation;SPBP8B7.16c|dbp2|II|ATP-dependent	SPCC1795.11|sum3|III|translation	30;1	30;1	30;1	>SPCC1795.11|sum3|III|translation initiation RNA helicase Sum3	2	30	30	30	23	21	28	23	23	21	28	23	23	21	28	23	61.6	61.6	61.6	69.758	636	636;550	0	323.31	By MS/MS	By MS/MS	By MS/MS	By MS/MS	46.1	46.2	55.8	50.6	1275500000	228560000	258410000	456740000	331830000	205400000	241340000	309800000	324710000	13	20	29
SPCC18.03|SPCC18.03|III|shuttle	SPCC18.03|SPCC18.03|III|shuttle	1	1	1	>SPCC18.03|SPCC18.03|III|shuttle craft like ubiquitin-protein ligase E3 (predicted)	1	1	1	1	0	0	0	1	0	0	0	1	0	0	0	1	1.2	1.2	1.2	121.09	1077	1077	0	3.1953	By matching	By matching	By matching	By MS/MS	0	0	0	1.2	0	0	0	0	0	0	0	0	0	0	0	0
SPCC18.04|pof6|III|F-box	SPCC18.04|pof6|III|F-box	2	2	2	>SPCC18.04|pof6|III|F-box protein Pof6	1	2	2	2	1	1	0	1	1	1	0	1	1	1	0	1	1.7	1.7	1.7	99.911	872	872	0.00081301	2.9123	By MS/MS	By MS/MS	By matching	By MS/MS	0.9	0.8	0	0.8	8510600	0	5159000	0	3351600	0	0	0	3351600	1	1	0
SPCC18.05c|SPCC18.05c|III|notchless-like	SPCC18.05c|SPCC18.05c|III|notchless-like	3	3	3	>SPCC18.05c|SPCC18.05c|III|notchless-like protein (predicted)	1	3	3	3	2	2	1	3	2	2	1	3	2	2	1	3	10.2	10.2	10.2	56.003	502	502	0	12.433	By MS/MS	By MS/MS	By matching	By MS/MS	7.6	7.6	3.2	10.2	33452000	7404500	8036600	2751800	15259000	7566400	8709900	0	12163000	2	1	0
SPCC18.14c|rpp0|III|60S	SPCC18.14c|rpp0|III|60S	2	2	2	>SPCC18.14c|rpp0|III|60S acidic ribosomal protein Rpp0 (predicted)	1	2	2	2	2	2	2	1	2	2	2	1	2	2	2	1	10.9	10.9	10.9	33.565	312	312	0	39.758	By MS/MS	By MS/MS	By MS/MS	By matching	10.9	10.9	10.9	6.7	92120000	26861000	25957000	29316000	9986800	0	0	24283000	0	1	1	0
SPCC18.15|dph7|III|WD	SPCC18.15|dph7|III|WD	3	3	3	>SPCC18.15|dph7|III|WD repeat protein, involved in diphthamide biosynthesis Dph7 (predicted)	1	3	3	3	2	3	3	1	2	3	3	1	2	3	3	1	15.3	15.3	15.3	37.04	326	326	0	16.087	By MS/MS	By MS/MS	By MS/MS	By MS/MS	8.6	15.3	15.3	4.6	38408000	6264500	15571000	11431000	5141800	10091000	10224000	7980400	0	2	2	3
SPCC18.18c|fum1|III|fumarate	SPCC18.18c|fum1|III|fumarate	10	10	10	>SPCC18.18c|fum1|III|fumarate hydratase (predicted)	1	10	10	10	9	10	9	8	9	10	9	8	9	10	9	8	24	24	24	56.321	520	520	0	110.8	By MS/MS	By MS/MS	By MS/MS	By MS/MS	19	24	19	19	491540000	140440000	134970000	112520000	103620000	105530000	115100000	93503000	109130000	10	10	8
SPCC1827.03c|SPCC1827.03c|III|acetyl-CoA	SPCC1827.03c|SPCC1827.03c|III|acetyl-CoA	11	11	11	>SPCC1827.03c|SPCC1827.03c|III|acetyl-CoA ligase (predicted)	1	11	11	11	10	11	9	9	10	11	9	9	10	11	9	9	23.2	23.2	23.2	56.274	512	512	0	67.037	By MS/MS	By MS/MS	By MS/MS	By MS/MS	22.9	23.2	21.5	21.1	300960000	67154000	102530000	59531000	71743000	52784000	82575000	54938000	76236000	9	11	10
SPCC1827.06c|SPCC1827.06c|III|aspartate	SPCC1827.06c|SPCC1827.06c|III|aspartate	5	5	5	>SPCC1827.06c|SPCC1827.06c|III|aspartate semialdehyde dehydrogenase (predicted)	1	5	5	5	5	4	3	4	5	4	3	4	5	4	3	4	21	21	21	38.55	357	357	0	16.928	By MS/MS	By MS/MS	By MS/MS	By MS/MS	21	17.6	11.5	17.6	123660000	36922000	42151000	21439000	23144000	26659000	31163000	26317000	24303000	3	1	2
SPCC1840.02c|bgs4|III|1,3-beta-glucan;SPAC24C9.07c|bgs2|I|1,3-beta-glucan	SPCC1840.02c|bgs4|III|1,3-beta-glucan	11;1	11;1	10;0	>SPCC1840.02c|bgs4|III|1,3-beta-glucan synthase subunit Bgs4	2	11	11	10	8	7	6	9	8	7	6	9	7	6	5	8	6.2	6.2	5.8	225.18	1955	1955;1894	0	46.455	By MS/MS	By MS/MS	By MS/MS	By MS/MS	4.2	3.9	3.2	5.2	115440000	24167000	31413000	24329000	35530000	24127000	28125000	23489000	27495000	7	8	5
SPCC1840.03|sal3|III|karyopherin	SPCC1840.03|sal3|III|karyopherin	6	6	6	>SPCC1840.03|sal3|III|karyopherin Sal3	1	6	6	6	3	5	2	6	3	5	2	6	3	5	2	6	7.3	7.3	7.3	121.87	1095	1095	0	15.734	By MS/MS	By MS/MS	By MS/MS	By MS/MS	3.9	5.4	2.6	7.3	55603000	13981000	19129000	8086200	14406000	12570000	14781000	0	15402000	2	2	1
SPCC1840.05c|SPCC1840.05c|III|phosphoglucomutase	SPCC1840.05c|SPCC1840.05c|III|phosphoglucomutase	10	10	10	>SPCC1840.05c|SPCC1840.05c|III|phosphoglucomutase (predicted)	1	10	10	10	10	8	9	9	10	8	9	9	10	8	9	9	20.1	20.1	20.1	65.494	587	587	0	67.344	By MS/MS	By MS/MS	By MS/MS	By MS/MS	20.1	14.7	17.7	18.9	244090000	63738000	56268000	56390000	67697000	44950000	57227000	47026000	67362000	8	6	8
SPCC188.02|par1|III|protein	SPCC188.02|par1|III|protein	6	6	6	>SPCC188.02|par1|III|protein phosphatase PP2A regulatory subunit B-56 Par1	1	6	6	6	6	4	6	4	6	4	6	4	6	4	6	4	12.2	12.2	12.2	63.345	548	548	0	18.206	By MS/MS	By MS/MS	By MS/MS	By MS/MS	12.2	8.8	12.2	8.8	43017000	12992000	8259400	12025000	9739800	9556200	7870500	9566300	10723000	7	3	5
SPCC188.06c|srp54|III|signal	SPCC188.06c|srp54|III|signal	3	3	3	>SPCC188.06c|srp54|III|signal recognition particle subunit Srp54	1	3	3	3	3	2	2	1	3	2	2	1	3	2	2	1	8	8	8	56.697	522	522	0	11.838	By MS/MS	By matching	By MS/MS	By MS/MS	8	5.6	5.6	3.3	49872000	15552000	11898000	13396000	9026500	0	0	11097000	0	2	0	0
SPCC188.08c|ubp5|III|ubiquitin	SPCC188.08c|ubp5|III|ubiquitin	4	4	4	>SPCC188.08c|ubp5|III|ubiquitin C-terminal hydrolase Ubp5	1	4	4	4	3	2	1	2	3	2	1	2	3	2	1	2	4	4	4	128.67	1108	1108	0	8.6076	By MS/MS	By MS/MS	By MS/MS	By MS/MS	3.2	2.3	1.2	1.9	32239000	22544000	3178000	2124700	4392000	18719000	0	0	0	2	2	1
SPCC18B5.01c|bfr1|III|brefeldin	SPCC18B5.01c|bfr1|III|brefeldin	16	16	16	>SPCC18B5.01c|bfr1|III|brefeldin A transmembrane transporter Bfr1	1	16	16	16	11	11	9	13	11	11	9	13	11	11	9	13	13	13	13	171.75	1530	1530	0	56.386	By MS/MS	By MS/MS	By MS/MS	By MS/MS	8.2	8.8	7.6	10.7	238190000	59365000	59692000	59303000	59835000	43324000	56311000	50546000	60300000	8	8	11
SPCC18B5.11c|cds1|III|replication	SPCC18B5.11c|cds1|III|replication	5	5	5	>SPCC18B5.11c|cds1|III|replication checkpoint kinase Cds1	1	5	5	5	3	2	3	3	3	2	3	3	3	2	3	3	17.2	17.2	17.2	52.013	460	460	0	11.275	By MS/MS	By MS/MS	By MS/MS	By MS/MS	9.3	5.9	8	11.5	47498000	7520500	10234000	7463800	22280000	9555800	9125700	9630700	15349000	2	2	2
SPCC1902.02|mug72|III|oxidoreductase	SPCC1902.02|mug72|III|oxidoreductase	1	1	1	>SPCC1902.02|mug72|III|oxidoreductase (predicted)	1	1	1	1	0	1	0	0	0	1	0	0	0	1	0	0	2.8	2.8	2.8	62.846	574	574	0.0023981	2.667	By matching	By MS/MS	By matching	By matching	0	2.8	0	0	0	0	0	0	0	0	0	0	0	0	1	0
SPCC1906.01|mpg1|III|mannose-1-phosphate	SPCC1906.01|mpg1|III|mannose-1-phosphate	12	12	12	>SPCC1906.01|mpg1|III|mannose-1-phosphate guanyltransferase Mpg1	1	12	12	12	10	11	10	10	10	11	10	10	10	11	10	10	53.7	53.7	53.7	39.718	363	363	0	132.56	By MS/MS	By MS/MS	By MS/MS	By MS/MS	46.3	50.4	44.6	46.3	579360000	152210000	164740000	125710000	136700000	120560000	142860000	104370000	139010000	10	12	11
SPCC191.02c|acs1|III|acetyl-CoA	SPCC191.02c|acs1|III|acetyl-CoA	29	29	29	>SPCC191.02c|acs1|III|acetyl-CoA ligase (predicted)	1	29	29	29	27	24	27	26	27	24	27	26	27	24	27	26	56.5	56.5	56.5	73.035	662	662	0	323.31	By MS/MS	By MS/MS	By MS/MS	By MS/MS	50	47.9	50	52.4	2093900000	438670000	643910000	440870000	570480000	367740000	540640000	367630000	578910000	22	27	22
SPCC191.07|cyc1|III|cytochrome	SPCC191.07|cyc1|III|cytochrome	6	6	6	>SPCC191.07|cyc1|III|cytochrome c	1	6	6	6	6	5	6	5	6	5	6	5	6	5	6	5	44	44	44	12.021	109	109	0	76.34	By MS/MS	By MS/MS	By MS/MS	By MS/MS	44	31.2	44	31.2	822870000	252190000	202780000	184230000	183670000	187000000	182880000	160930000	192290000	7	6	4
SPCC1919.05|ski3|III|Ski	SPCC1919.05|ski3|III|Ski	22	22	22	>SPCC1919.05|ski3|III|Ski complex TPR repeat subunit Ski3 (predicted)	1	22	22	22	11	15	17	17	11	15	17	17	11	15	17	17	23.3	23.3	23.3	157.87	1389	1389	0	79.484	By MS/MS	By MS/MS	By MS/MS	By MS/MS	11.3	16	18.3	18.8	310870000	57720000	71550000	97083000	84521000	57498000	64787000	72557000	80630000	9	10	14
SPCC1919.10c|myo52|III|myosin	SPCC1919.10c|myo52|III|myosin	2	1	1	>SPCC1919.10c|myo52|III|myosin type V	1	2	1	1	2	1	2	1	1	0	1	0	1	0	1	0	1.6	0.9	0.9	175.15	1516	1516	0.0076336	2.2294	By MS/MS	By matching	By MS/MS	By matching	1.6	0.8	1.6	0.8	7186500	3641600	0	3544900	0	0	0	2936300	0	1	0	1
SPCC1919.15|brl1|III|ubiquitin-protein	SPCC1919.15|brl1|III|ubiquitin-protein	3	3	3	>SPCC1919.15|brl1|III|ubiquitin-protein ligase E3 Brl1	1	3	3	3	3	3	3	3	3	3	3	3	3	3	3	3	5.6	5.6	5.6	80.722	692	692	0	7.814	By MS/MS	By MS/MS	By MS/MS	By MS/MS	5.6	5.6	5.6	5.6	48912000	14862000	10564000	15435000	8050400	13647000	7603200	15094000	6075900	2	1	2
SPCC23B6.01c|SPCC23B6.01c|III|oxysterol	SPCC23B6.01c|SPCC23B6.01c|III|oxysterol	13	13	13	>SPCC23B6.01c|SPCC23B6.01c|III|oxysterol binding protein (predicted)	1	13	13	13	9	7	10	3	9	7	10	3	9	7	10	3	34	34	34	54.647	479	479	0	37.641	By MS/MS	By MS/MS	By MS/MS	By MS/MS	24.4	19.4	26.3	9.2	127480000	39317000	22625000	46710000	18826000	19990000	22386000	29417000	25734000	6	5	6
SPCC23B6.04c|SPCC23B6.04c|III|sec14	SPCC23B6.04c|SPCC23B6.04c|III|sec14	23	23	23	>SPCC23B6.04c|SPCC23B6.04c|III|sec14 cytosolic factor family, glycerophospholipid-transfer protein (predicted)	1	23	23	23	17	14	17	10	17	14	17	10	17	14	17	10	33	33	33	110.72	1008	1008	0	182.63	By MS/MS	By MS/MS	By MS/MS	By MS/MS	25.1	21.6	21.5	15.7	412390000	146330000	72481000	125040000	68540000	99100000	68850000	94187000	86430000	18	11	23
SPCC24B10.09|rps1702|III|40S	SPCC24B10.09|rps1702|III|40S	4	1	1	>SPCC24B10.09|rps1702|III|40S ribosomal protein S17 (predicted)	1	4	1	1	4	4	4	3	1	1	1	1	1	1	1	1	32.6	16.7	16.7	15.534	132	132	0	8.2868	By MS/MS	By matching	By matching	By matching	32.6	32.6	32.6	24.2	43549000	12793000	13555000	7729400	9471500	0	0	0	9471500	1	0	0
SPCC24B10.21|tpi1|III|triosephosphate	SPCC24B10.21|tpi1|III|triosephosphate	14	14	14	>SPCC24B10.21|tpi1|III|triosephosphate isomerase	1	14	14	14	13	8	13	10	13	8	13	10	13	8	13	10	82.7	82.7	82.7	27.227	249	249	0	142.71	By MS/MS	By MS/MS	By MS/MS	By MS/MS	74.7	47.4	74.7	68.7	771080000	246010000	158640000	242030000	124400000	165010000	168820000	156670000	157530000	14	10	15
SPCC285.08|ret2|III|coatomer	SPCC285.08|ret2|III|coatomer	1	1	1	>SPCC285.08|ret2|III|coatomer delta subunit Ret2 (predicted)	1	1	1	1	1	1	0	1	1	1	0	1	1	1	0	1	7.1	7.1	7.1	27.097	240	240	0	3.1269	By matching	By MS/MS	By matching	By MS/MS	7.1	7.1	0	7.1	9294600	2867700	2788900	0	3637900	0	0	0	3637900	0	1	0
SPCC285.09c|cgs2|III|cAMP-specific	SPCC285.09c|cgs2|III|cAMP-specific	2	2	2	>SPCC285.09c|cgs2|III|cAMP-specific phosphodiesterase Cgs2	1	2	2	2	1	1	0	1	1	1	0	1	1	1	0	1	6.1	6.1	6.1	38.65	346	346	0	4.6361	By MS/MS	By MS/MS	By matching	By MS/MS	4	2	0	2	4464900	1758000	1666500	0	1040400	1459700	0	0	0	1	0	0
SPCC285.16c|msh6|III|MutS	SPCC285.16c|msh6|III|MutS	2	2	2	>SPCC285.16c|msh6|III|MutS protein homolog	1	2	2	2	1	2	1	1	1	2	1	1	1	2	1	1	1.4	1.4	1.4	141.51	1254	1254	0	5.7394	By matching	By MS/MS	By matching	By MS/MS	0.8	1.4	0.8	0.8	9521400	1947200	2923400	2399100	2251800	0	0	0	2251800	0	2	0
SPCC290.03c|nup186|III|nucleoporin	SPCC290.03c|nup186|III|nucleoporin	2	2	2	>SPCC290.03c|nup186|III|nucleoporin Nup186	1	2	2	2	0	2	2	0	0	2	2	0	0	2	2	0	1.4	1.4	1.4	186.41	1647	1647	0	4.8885	By matching	By MS/MS	By MS/MS	By matching	0	1.4	1.4	0	13191000	0	6494400	6696500	0	0	5679900	5549600	0	0	2	1
SPCC306.02c|yip3|III|Rab	SPCC306.02c|yip3|III|Rab	3	3	3	>SPCC306.02c|yip3|III|Rab GTPase binding involved in ER to Golgi vesicle transport Yip3 (predicted)	1	3	3	3	1	3	3	3	1	3	3	3	1	3	3	3	14	14	14	18.84	171	171	0	12.023	By matching	By MS/MS	By MS/MS	By MS/MS	5.3	14	14	14	16689000	4014600	4620100	3633400	4421200	0	4047100	0	4416800	0	4	2
SPCC306.09c|cap1|III|adenylyl	SPCC306.09c|cap1|III|adenylyl	1	1	1	>SPCC306.09c|cap1|III|adenylyl cyclase-associated protein Cap1	1	1	1	1	1	1	1	1	1	1	1	1	1	1	1	1	2	2	2	60.243	551	551	0	3.6717	By MS/MS	By MS/MS	By matching	By MS/MS	2	2	2	2	16692000	3061500	4457300	3581200	5591800	0	0	0	5591800	1	1	0
SPCC31H12.05c|sds21|III|serine/threonine	SPCC31H12.05c|sds21|III|serine/threonine	1	1	1	>SPCC31H12.05c|sds21|III|serine/threonine protein phosphatase PP1 subfamily, Sds21	1	1	1	1	1	1	1	1	1	1	1	1	1	1	1	1	3.4	3.4	3.4	36.829	322	322	0.00081235	2.9086	By MS/MS	By MS/MS	By MS/MS	By MS/MS	3.4	3.4	3.4	3.4	13582000	2781300	2989000	3372100	4439500	0	0	0	4439500	1	1	0
SPCC31H12.07|sec231|III|COPII	SPCC31H12.07|sec231|III|COPII	6	6	6	>SPCC31H12.07|sec231|III|COPII cargo receptor subunit Sec23a (predicted)	1	6	6	6	5	6	5	6	5	6	5	6	5	6	5	6	11.2	11.2	11.2	84.844	759	759	0	35.983	By MS/MS	By MS/MS	By MS/MS	By MS/MS	9.6	11.2	9.6	11.2	146420000	29515000	45663000	30763000	40476000	24002000	37626000	25773000	43020000	4	5	4
SPCC31H12.08c|ccr4|III|CCR4-Not	SPCC31H12.08c|ccr4|III|CCR4-Not	3	3	3	>SPCC31H12.08c|ccr4|III|CCR4-Not complex subunit Ccr4 (predicted)	1	3	3	3	1	1	2	3	1	1	2	3	1	1	2	3	6.4	6.4	6.4	76.455	690	690	0	12.604	By MS/MS	By matching	By MS/MS	By MS/MS	1.7	2.8	4.6	6.4	21840000	0	2399600	13343000	6097400	0	0	0	6097400	1	0	1
SPCC320.08|SPCC320.08|III|transmembrane	SPCC320.08|SPCC320.08|III|transmembrane	1	1	1	>SPCC320.08|SPCC320.08|III|transmembrane transporter (predicted)	1	1	1	1	0	1	0	0	0	1	0	0	0	1	0	0	7.5	7.5	7.5	56.779	505	505	0.0024058	2.7286	By matching	By MS/MS	By matching	By matching	0	7.5	0	0	6750300	0	6750300	0	0	0	5906600	0	0	0	1	0
SPCC320.10|srp72|III|signal	SPCC320.10|srp72|III|signal	1	1	1	>SPCC320.10|srp72|III|signal recognition particle subunit Srp72 (predicted)	1	1	1	1	1	1	0	1	1	1	0	1	1	1	0	1	1.6	1.6	1.6	63.28	561	561	0	3.5398	By matching	By MS/MS	By matching	By matching	1.6	1.6	0	1.6	4812200	1441100	1827100	0	1544000	0	0	0	1544000	0	0	0
SPCC330.06c|pmp20|III|thioredoxin	SPCC330.06c|pmp20|III|thioredoxin	3	3	3	>SPCC330.06c|pmp20|III|thioredoxin peroxidase Pmp20	1	3	3	3	3	3	3	0	3	3	3	0	3	3	3	0	33.3	33.3	33.3	16.675	156	156	0	17.779	By MS/MS	By MS/MS	By MS/MS	By matching	33.3	33.3	33.3	0	65403000	19685000	12877000	32840000	0	15372000	0	28176000	0	2	1	1
SPCC330.08|alg11|III|alpha-1,2-mannosyltransferase	SPCC330.08|alg11|III|alpha-1,2-mannosyltransferase	5	5	5	>SPCC330.08|alg11|III|alpha-1,2-mannosyltransferase Alg11	1	5	5	5	3	4	2	2	3	4	2	2	3	4	2	2	11	11	11	53.277	471	471	0	13.548	By MS/MS	By MS/MS	By MS/MS	By MS/MS	7	9.6	4.2	4.7	50047000	16563000	15990000	4936900	12556000	0	13992000	0	0	1	3	2
SPCC330.12c|sdh3|III|succinate	SPCC330.12c|sdh3|III|succinate	1	1	1	>SPCC330.12c|sdh3|III|succinate dehydrogenase (ubiquinone) cytochrome b subunit (predicted)	1	1	1	1	1	1	1	0	1	1	1	0	1	1	1	0	8.9	8.9	8.9	20.136	180	180	0	3.9341	By MS/MS	By MS/MS	By MS/MS	By matching	8.9	8.9	8.9	0	22668000	8804800	6167000	7696200	0	0	0	6375000	0	1	1	1
SPCC338.07c|naa15|III|NatA	SPCC338.07c|naa15|III|NatA	6	6	6	>SPCC338.07c|naa15|III|NatA N-acetyltransferase complex regulatory subunit Naa15 (predicted)	1	6	6	6	6	2	6	4	6	2	6	4	6	2	6	4	8.6	8.6	8.6	83.677	729	729	0	16.221	By MS/MS	By MS/MS	By MS/MS	By MS/MS	8.6	2.7	8.6	6	70291000	20832000	10346000	24696000	14417000	12783000	16516000	14999000	16926000	4	2	5
SPCC338.10c|cox5|III|cytochrome	SPCC338.10c|cox5|III|cytochrome	2	2	2	>SPCC338.10c|cox5|III|cytochrome c oxidase subunit V (predicted)	1	2	2	2	2	1	1	1	2	1	1	1	2	1	1	1	12.4	12.4	12.4	20.735	186	186	0	4.1162	By MS/MS	By matching	By MS/MS	By MS/MS	12.4	7	5.4	7	8489900	2000300	3395500	0	3094100	0	0	0	3094100	1	0	1
[truncated: 105 more rows]
[truncated: 14 more columns]

## Sheet: E170214_LFQ_summary
Accession No	Peptide count, strain KS9021, PMG medium	Peptide count, strain KS9077, PMG medium	Peptide count, strain KS9021, LowN medium	Peptide count, strain KS9077, LowN medium	Mol. weight [kDa]	Score	LFQ intensity, strain KS9021, PMG medium	LFQ intensity, strain KS9077, PMG medium	LFQ intensity sum (KS9021+KS9077), PMG medium	LFQ ratio (KS9021/KS9077), PMG medium	LFQ intensity, strain KS9021, LowN medium	LFQ intensity, strain KS9077, LowN medium	LFQ intensity sum (KS9021+KS9077), LowN medium	LFQ ratio (KS9021/KS9077), LowN medium	Protein Name
[truncated: 1,270 more rows]

[truncated: 2 more sheets: E170306_all, E170306_LFQ_summary]
